# Supplementary material for: Mesoamerican Origin and Pre- and Post-Columbian Expansions of the Ranges of Acanthoscelides obtectus Say, a Cosmopolitan Insect Pest of the Common Bean
Source: PubMed Central journal article supplement (PMC3729460; doi:10.1371/journal.pone.0070039), 2013-07-31
Supplement: pone.0070039.s001.pdf [file pone.0070039.s001.pdf]

**Table S1**

Sampling sites of *Acanthoscelides obtectus*. Sites where the bean bruchid was sampled for this study are listed, together with the abbreviation code, sample sizes for the COI, rRNA 16S, and rRNA 12S genes, and the geographical coordinates.

| Site                           | Code | Sample size |           |           | Latitude (S) | Longitude (W)   |
|--------------------------------|------|-------------|-----------|-----------|--------------|-----------------|
|                                |      | COI         | 16S       | 12S       |              |                 |
| Aquidauana, MS                 | AQU  | 5           | 2         |           | 20°28'28.59" | 55°47'14.99"    |
| Bom Jesus do Amparo, MG        | BJA  | 3           | 2         | 1         | 19°42'01.84" | 43°28'41.16"    |
| Campos dos Goytacazes, RJ      | CAM  | 2           |           |           | 21°45'08.20" | 41°20'00.42"    |
| Campo Mourão, PR               | CMO  | 4           | 2         |           | 24°08'20.04" | 52°36'51.60"    |
| Coimbra, MG                    | COI  | 1           |           |           | 20°50'58.84" | 42°47'27.04"    |
| Córrego São João, SP           | CSJ  | 1           | 1         |           | 21°08'42.91" | 51°05'27.09"    |
| Ervália- MG                    | ERV  | 2           |           |           | 20°50'35.05" | 42°39'32.19"    |
| Governador Valadares, MG       | GOV  | 2           |           |           | 18°40'17.30" | 42°20'41.42"    |
| Hematita, MG                   | HEM  | 2           |           |           | 19°31'00.00" | 43°06'17.14"    |
| Herculândia, PR                | HER  | 2           |           |           | 23°16'11.49" | 53°24'04.54"    |
| Herval, RS                     | HEV  | 4           | 2         | 1         | 32°00'46.44" | 53°24'11.24"    |
| Jaboticabal, SP                | JAB  | 2           |           |           | 21°15'19.40" | 48°19'20.70"    |
| Lavras, MG                     | LAV  | 2           | 1         |           | 21°14'44.65" | 44°59'59.20"    |
| Macaé, RJ                      | MAC  | 3           | 3         |           | 22°35'58.78" | 42°20'00.42"    |
| Maringá, PR                    | MAR  | 4           | 1         |           | 23°29'47.84" | 52°06'41.81"    |
| Montes Claros, MG              | MOC  | 7           | 3         | 1         | 16°44'13.25" | 43°51'53.06"    |
| Piratuba, SC                   | PIT  | 5           | 3         | 3         | 27°24'29.08" | 51°45'07.43"    |
| Cacoal, RO                     | RON  | 5           | 4         | 1         | 11°24'31.37" | 61° 26'38.20"   |
| Sto. Antônio de Goiás, GO      | SGO  | 2           |           |           | 16°29'11.36" | 49°18'46.37"    |
| São João, PE                   | SJA  | 7           | 5         |           | 7°37'59.92"  | 37°38'59.80"    |
| Santa Maria, ES                | SMA  | 7           | 3         |           | 21°11'07.18" | 41°06'17.14"    |
| São Miguel do Anta, MG         | SMI  | 2           |           |           | 20°42'51.40" | 42°45'14.52"    |
| Sobradinho, RS                 | SOB  | 6           | 3         | 1         | 29°25'21.92" | 53°01'57.12"    |
| Taparuba, MG                   | TAP  | 2           |           |           | 19°46'00.74" | 41°37'21.42"    |
| Toledo, PR                     | TOL  | 3           | 2         | 1         | 24°43'11.50" | 53°44'35.81"    |
| Viçosa, MG                     | VIC  | 1           |           |           | 20°40'20.22" | 42°59'40.72"    |
| Xanxerê, SC                    | XAN  | 1           |           |           | 26°53'09.07" | 52°24'53.16"    |
| Xaxim, SC                      | XAX  | 1           |           |           | 26°56'55.98" | 52°31'38.23"    |
| Pietermaritzburg, South Africa | AFR  | 9           | 7         | 2         | 29°36'12.63" | 30°22'46.62"(E) |
| Argelia, Colombia              | CL1  | 9           | 9         | 9         | 4°43'52"(N)  | 76°7'0"         |
| Villa de Leyva, Colombia       | CL2  | 8           | 2         | 7         | 5°35'43"(N)  | 73°31'58"       |
| Cuenca, Ecuador                | ECU  | 5           | 1         | 4         | 2°54'00"     | 78°59'00"       |
| Marcará, Peru                  | AOPE | 7           | 4         | 4         | 9°19'21"     | 77°36'13"       |
| Chimbote, Peru                 | PE2  | 7           | 6         | 7         | 9°4'28"      | 78°35'34"       |
| Pangoa, Peru                   | PE3  | 1           |           |           | 12°7'0"      | 73°0'0"         |
| Huanuco, Peru                  | PE4  | 4           |           |           | 9°55'46"     | 76°14'23"       |
| <b>Total</b>                   |      | <b>139</b>  | <b>66</b> | <b>42</b> |              |                 |

## datasetS1

#NEXUS

```
begin data;  
  dimensions ntax=56 nchar=378;  
  format datatype=dna gap=- interleave=no;  
  matrix
```

afr19

```
CGGGCGATGTGTACATATTTTAGAGCTTTAATCATCTTAAAAAATCTAAAAAATT  
ACTCTCAAATCCAAATTCAAATTTTTTTAACAAAAATTATTTTAAAATAAATTTATT  
GTAACCCATTTCTTCTTTATTATAAACTACACCTTGATCTGATTTATTTTTTAATAA  
AAAATTTTAAATATTTATAATTCTATTAATAATTTTAACTACGACGATATATAAAC  
TAATAAATAAAGTGATCTAATCGTGGACTATCGATTATAGAACAGGTTCCCTCTG  
AAAAGACTAAAATACCGCCAAATTTTTTAATTTTCAAGAACATAACTAATACTAAT  
TAAGTAAAAAATTTACATTTTTTAATAATAGGGTATCTAA
```

afr9

```
CGGGCGATGTGTACATATTTTAGAGCTTTAATCATCTTAAAAAATCTAAAAAATT  
ACTCTCAAATCCAAATTCAAATTTTTTTAACAAAAATTATTTTAAAATAAATTTATT  
GTAACCCATTTCTTCTTTATTATAAACTACACCTTGATCTGATTTATTTTTTAATAA  
AAAATTTTAAATATTTATAATTCTATTAATAATTTTAACTACGACGATATATAAAC  
TAATAAATAAAGTGATCTAATCGTGGACTATCGATTATAGAACAGGTTCCCTCTG  
AAAAGACTAAAATACCGCCAAATTTTTTAATTTTCAAGAACATAACTAATACTAAT  
TAAGTAAAAAATTTACATTTTTTAATAATAGGGTATCTAA
```

AOPE\_12

```
CGGGCGATGTGTACATATTTTAGAGCTTTAATCATCTTAAAAAATCTAAAAAATT  
ACTCTCAAATCCAAATTCAAATTTTTTTAACAAAAATTATTTTCAAATAAATTTATT  
GTAACCCATTTCTTCTTTATTATAAACTACACCTTGATCTGATTTATTTTTTAATAA  
AAAATTTTAAATATTTATAATTCTATTAATAATTTTAACTACGACGATATATAAAC  
TAATAAATAAAGTGATCTAATCGTGGACTATCGATTATAGAACAGGTTCCCTCTG  
AAAAGACTAAAATACCGCCAAATTTTTTAATTTTCAAGAACATAACTAATACTAAT  
TAAGTAAAAAATTTACATTTTTTAATAATAGGGTATCTAA
```

AOPE\_13

```
CGGGCGATGTGTACATATTTTAGAGCTTTAATCATCTTAAAAAATCTAAAAAATT  
ACTCTCAAATCCAAATTCAAATTTTTTTAACAAAAATTATTTTCAAATAAATTTATT  
GTAACCCATTTCTTCTTTATTATAAACTACACCTTGATCTGATTTATTTTTTAATAA  
AAAATTTTAAATATTTATAATTCTATTAATAATTTTAACTACGACGATATATAAAC  
TAATAAATAAAGTGATCTAATCGTGGACTATCGATTATAGAACAGGTTCCCTCTG  
AAAAGACTAAAATACCGCCAAATTTTTTAATTTTCAAGAACATAACTAATACTAAT  
TAAGTAAAAAATTTACATTTTTTAATAATAGGGTATCTAA
```

AOPE\_14

```
CGGGCGATGTGTACATATTTTAGAGCTTTAATCATCTTAAAAAATCTAAAAAATT  
ACTCTCAAATCCAAATTCAAATTTTTTTAACAAAAATTATTTTCAAATAAATTTATT  
GTAACCCATTTCTTCTTTATTATAAACTACACCTTGATCTGATTTATTTTTTAATAA  
AAAATTTTAAATATTTATAATTCTATTAATAATTTTAACTACGACGATATATAAAC  
TAATAAATAAAGTGATCTAATCGTGGACTATCGATTATAGAACAGGTTCCCTCTG  
AAAAGACTAAAATACCGCCAAATTTTTTAATTTTCAAGAACATAACTAATACTAAT  
TAAGTAAAAAATTTACATTTTTTAATAATAGGGTATCTAA
```

AOPE\_4

CGGGCGATGTGTACATATTTTAGAGCTTTAATCATCTTAAAAAATCTAAAAAATT  
ACTCTCAAATCCAAATTCAAATTTTTTTAACAAAAATTATTTTCAAATAAATTTATT  
GTAACCCATTTCTTCTTTATTATAAACTACACCTTGATCTGATTTATTTTTTAATAA  
AAAATTTTAAATATTTATAATTCTATTAATAATTTAAACTACGACGATATATAAAC  
TAATAAATAAAGTGCATCTAATCGTGGACTATCGATTATAGAACAGGTTCCCTCTG  
AAAAGACTAAAATACCGCCAAATTTTTTAATTTTCAAGAACATAACTAATACTAAT  
TAAGTAAAAAATTTACATTTTTTAATAATAGGGTATCTAA

bjal

CGGGCGATGTGTACATATTTTAGAGCTTTAATCATCTTAAAAAATCTAAAAAATT  
ACTCTCAAATCCAAATTCAAATTTTTTTAACAAAAATTATTTTAAATAAATTTATT  
GTAACCCATTTCTTCTTTATTATAAACTACACCTTGATCTGATTTATTTTTTAATAA  
AAAATTTTAAATATTTATAATTCTATTAATAATTTAAACTACGACGATATATAAAC  
TAATAAATAAAGTGCATCTAATCGTGGACTATCGATTATAGAACAGGTTCCCTCTG  
AAAAGACTAAAATACCGCCAAATTTTTTAATTTTCAAGAACATAACTAATACTAAT  
TAAGTAAAAAATTTACATTTTTTAATAATAGGGTATCTAA

CAM\_YAH

CGGGCGATGTGTACATATTTTAGAGCTTTAATCATCTTAAAAAATCTAAAAAATT  
ACTCTCAAATCCAAATTCAAATTTTTTTAACAAAAATTATTTTAAATAAATTTATT  
GTAACCCATTTCTTCTTTATTATAAACTACACCTTGATCTGATTTATTTTTTAATAA  
AAAATTTTAAATATTTATAATTCTATTAATAATTTAAACTACGACGATATATAAAC  
TAATAAATAAAGTGCATCTAATCGTGGACTATCGATTATAGAACAGGTTCCCTCTG  
AAAAGACTAAAATACCGCCAAATTTTTTAATTTTCAAGAACATAACTAATACTAAT  
TAAGTAAAAAATTTACATTTTTTAATAATAGGGTATCTAA

CL1\_1

CGGGCGATGTGTACATATTTTAGAGCTTTAATCATCTTAAAAAATCTAAAAAATT  
ACTCTCAAATCCAAATTCAAATTTTTTTAACAAAAATTATTTTCAAATAAATTTATT  
GTAACCCATTTCTTCTTTATTATAAACTACACCTTGATCTGATTTATTTTTTAATAA  
AAAATTTTAAATATTTATAATTCTATTAATAATTTAAACTACGACGATATATAAAC  
TAATAAATAAAGTGCATCTAATCGTGGACTATCGATTATAGAACAGGTTCCCTCTG  
AAAAGACTAAAATACCGCCAAATTTTTTAATTTTCAAGAACATAACTAATACTAAT  
TAAGTAAAAAATTTACATTTTTTAATAATAGGGTATCTAA

CL1\_2

CGGGCGATGTGTACATATTTTAGAGCTTTAATCATCTTAAAAAATCTAAAAAATT  
ACTCTCAAATCCAAATTCAAATTTTTTTAACAAAAATTATTTTCAAATAAATTTATT  
GTAACCCATTTCTTCTTTATTATAAACTACACCTTGATCTGATTTATTTTTTAATAA  
AAAATTTTAAATATTTATAATTCTATTAATAATTTAAACTACGACGATATATAAAC  
TAATAAATAAAGTGCATCTAATCGTGGACTATCGATTATAGAACAGGTTCCCTCTG  
AAAAGACTAAAATACCGCCAAATTTTTTAATTTTCAAGAACATAACTAATACTAAT  
TAAGTAAAAAATTTACATTTTTTAATAATAGGGTATCTAA

CL1\_3

CGGGCGATGTGTACATATTTTAGAGCTTTAATCATCTTAAAAAATCTAAAAAATT  
ACTCTCAAATCCAAATTCAAATTTTTTTAACAAAAATTATTTTCAAATAAATTTATT  
GTAACCCATTTCTTCTTTATTATAAACTACACCTTGATCTGATTTATTTTTTAATAA  
AAAATTTTAAATATTTATAATTCTATTAATAATTTAAACTACGACGATATATAAAC  
TAATAAATAAAGTGCATCTAATCGTGGACTATCGATTATAGAACAGGTTCCCTCTG  
AAAAGACTAAAATACCGCCAAATTTTTTAATTTTCAAGAACATAACTAATACTAAT  
TAAGTAAAAAATTTACATTTTTTAATAATAGGGTATCTAA

CL1\_4

CGGGCGATGTGTACATATTTTAGAGCTTTAATCATCTTAAAAAATCTAAAAAATT

ACTCTCAAATCCAAATTCAAATTTTTTTAACAAAAATTATTTTCAAATAAATTTATT  
GTAACCCATTTCTTCTTTATTATAAACTACACCTTGATCTGATTTATTTTTTAATAA  
AAAATTTTAAATATTTATAATTCTATTAATAATTTAACTACGACGATATATAAAC  
TAATAAATAAAGTGATCTAATCGTGGACTATCGATTATAGAACAGGTTCCCTCTG  
AAAAGACTAAAATACCGCCAAATTTTTTAATTTTCAAGAACATAACTAATACTAAT  
TAAGTAAAAAAATTTACATTTTTTAATAATAGGGTATCTAA

CL1\_5

CGGGCGATGTGTACATATTTTAGAGCTTTAATCATCTTAAAAAAATCTAAAAAATT  
ACTCTCAAATCCAAATTCAAATTTTTTTAACAAAAATTATTTTCAAATAAATTTATT  
GTAACCCATTTCTTCTTTATTATAAACTACACCTTGATCTGATTTATTTTTTAATAA  
AAAATTTTAAATATTTATAATTCTATTAATAATTTAACTACGACGATATATAAAC  
TAATAAATAAAGTGATCTAATCGTGGACTATCGATTATAGAACAGGTTCCCTCTG  
AAAAGACTAAAATACCGCCAAATTTTTTAATTTTCAAGAACATAACTAATACTAAT  
TAAGTAAAAAAATTTACATTTTTTAATAATAGGGTATCTAA

CL1\_6

CGGGCGATGTGTACATATTTTAGAGCTTTAATCATCTTAAAAAAATCTAAAAAATT  
ACTCTCAAATCCAAATTCAAATTTTTTTAACAAAAATTATTTTCAAATAAATTTATT  
GTAACCCATTTCTTCTTTATTATAAACTACACCTTGATCTGATTTATTTTTTAATAA  
AAAATTTTAAATATTTATAATTCTATTAATAATTTAACTACGACGATATATAAAC  
TAATAAATAAAGTGATCTAATCGTGGACTATCGATTATAGAACAGGTTCCCTCTG  
AAAAGACTAAAATACCGCCAAATTTTTTAATTTTCAAGAACATAACTAATACTAAT  
TAAGTAAAAAAATTTACATTTTTTAATAATAGGGTATCTAA

CL1\_7

CGGGCGATGTGTACATATTTTAGAGCTTTAATCATCTTAAAAAAATCTAAAAAATT  
ACTCTCAAATCCAAATTCAAATTTTTTTAACAAAAATTATTTTCAAATAAATTTATT  
GTAACCCATTTCTTCTTTATTATAAACTACACCTTGATCTGATTTATTTTTTAATAA  
AAAATTTTAAATATTTATAATTCTATTAATAATTTAACTACGACGATATATAAAC  
TAATAAATAAAGTGATCTAATCGTGGACTATCGATTATAGAACAGGTTCCCTCTG  
AAAAGACTAAAATACCGCCAAATTTTTTAATTTTCAAGAACATAACTAATACTAAT  
TAAGTAAAAAAATTTACATTTTTTAATAATAGGGTATCTAA

CL1\_8

CGGGCGATGTGTACATATTTTAGAGCTTTAATCATCTTAAAAAAATCTAAAAAATT  
ACTCTCAAATCCAAATTCAAATTTTTTTAACAAAAATTATTTTCAAATAAATTTATT  
GTAACCCATTTCTTCTTTATTATAAACTACACCTTGATCTGATTTATTTTTTAATAA  
AAAATTTTAAATATTTATAATTCTATTAATAATTTAACTACGACGATATATAAAC  
TAATAAATAAAGTGATCTAATCGTGGACTATCGATTATAGAACAGGTTCCCTCTG  
AAAAGACTAAAATACCGCCAAATTTTTTAATTTTCAAGAACATAACTAATACTAAT  
TAAGTAAAAAAATTTACATTTTTTAATAATAGGGTATCTAA

CL1\_9

CGGGCGATGTGTACATATTTTAGAGCTTTAATCATCTTAAAAAAATCTAAAAAATT  
ACTCTCAAATCCAAATTCAAATTTTTTTAACAAAAATTATTTTCAAATAAATTTATT  
GTAACCCATTTCTTCTTTATTATAAACTACACCTTGATCTGATTTATTTTTTAATAA  
AAAATTTTAAATATTTATAATTCTATTAATAATTTAACTACGACGATATATAAAC  
TAATAAATAAAGTGATCTAATCGTGGACTATCGATTATAGAACAGGTTCCCTCTG  
AAAAGACTAAAATACCGCCAAATTTTTTAATTTTCAAGAACATAACTAATACTAAT  
TAAGTAAAAAAATTTACATTTTTTAATAATAGGGTATCTAA

CL2\_1

CGGGCGATGTGTACATATTTTAGAGCTTTAATCATCTTAAAAAAATCTAAAAAATT  
ACTCTCAAATCCAAATTCAAATTTTTTTAACAAAAATTATTTTCAAATAAATTTATT  
GTAACCCATTTCTTCTTTATTATAAACTACACCTTGATCTGATTTATTTTTTAATAA

AAAATTTTAAATATTTATAATTCTATTTAAAATATTTAAACTACGACGATATATAAAC  
TAATAAATAAAGTGCATCTAATCGTGGACTATCGATTATAGAACAGGTTCCCTCTG  
AAAAGACTAAAATACCGCCAAATTTTTTAATTTTCAAGAACATAACTAATACTAAT  
TAAGTAAAAAAATTTACATTTTTTAATAATAGGGTATCTAA

CL2\_2

CGGGCGATGTGTACATATTTTAGAGCTTTAATCATCTTAAAAAAATCTAAAAAATT  
ACTCTCAAATCCAAATTTCAAATTTTTTTAACAAAAATTATTTTCAAATAAATTTATT  
GTAACCCATTTCTTCTTTATTATAAACTACACCTTGATCTGATTTATTTTTTAATAA  
AAAATTTTAAATATTTATAATTCTATTTAAAATATTTAAACTACGACGATATATAAAC  
TAATAAATAAAGTGCATCTAATCGTGGACTATCGATTATAGAACAGGTTCCCTCTG  
AAAAGACTAAAATACCGCCAAATTTTTTAATTTTCAAGAACATAACTAATACTAAT  
TAAGTAAAAAAATTTACATTTTTTAATAATAGGGTATCTAA

EQU\_5

CGGGCGATGTGTACATATTTTAGAGCTTTAATCATCTTAAAAAAATCTAAAAAATT  
ACTCTCAAATCCAAATTTCAAATTTTTTTAACAAAAATTATTTTCAAATAAATTTATT  
GTAACCCATTTCTTCTTTATTATAAACTACACCTTGATCTGATTTATTTTTTAATAA  
AAAATTTTAAATATTTATAATTCTATTTAAAATATTTAAACTACGACGATATATAAAC  
TAATAAATAAAGTGCATCTAATCGTGGACTATCGATTATAGAACAGGTTCCCTCTG  
AAAAGACTAAAATACCGCCAAATTTTTTAATTTTCAAGAACATAACTAATACTAAT  
TAAGTAAAAAAATTTACATTTTTTAATAATAGGGTATCTAA

FRA\_CHA\_5

CGGGCGATGTGTACATATTTTAGAGCTTTAATCATCTTAAAAAAATCTAAAAAATT  
ACTCTCAAATCCAAATTTCAAATTTTTTTAACAAAAATTATTTTAAAATAAATTTATT  
GTAACCCATTTCTTCTTTATTATAAACTACACCTTGATCTGATTTATTTTTTAATAA  
AAAATTTTAAATATTTATAATTCTATTTAAAATATTTAAACTACGACGATATATAAAC  
TAATAAATAAAGTGCATCTAATCGTGGACTATCGATTATAGAACAGGTTCCCTCTG  
AAAAGACTAAAATACCGCCAAATTTTTTAATTTTCAAGAACATAACTAATACTAAT  
TAAGTAAAAAAATTTACATTTTTTAATAATAGGGTATCTAA

hev1

CGGGCGATGTGTACATATTTTAGAGCTTTAATCATCTTAAAAAAATCTAAAAAATT  
ACTCTCAAATCCAAATTTCAAATTTTTTTAACAAAAATTATTTTAAAATAAATTTATT  
GTAACCCATTTCTTCTTTATTATAAACTACACCTTGATCTGATTTATTTTTTAATAA  
AAAATTTTAAATATTTATAATTCTATTTAAAATATTTAAACTACGACGATATATAAAC  
TAATAAATAAAGTGCATCTAATCGTGGACTATCGATTATAGAACAGGTTCCCTCTG  
AAAAGACTAAAATACCGCCAAATTTTTTAATTTTCAAGAACATAACTAATACTAAT  
TAAGTAAAAAAATTTACATTTTTTAATAATAGGGTATCTAA

MEX\_COE\_2

CGGGCGATGTGTACATATTTTAGAGCTTTAATCATCTTAAAAAAATCTAAAAAATT  
ACTCTCAAATCCAAATTTCAAATTTTTTTAACAAAAATTATTTTCAAATAAATTTATT  
GTAACCCATTTCTTCTTTATTATAAACTACACCTTGATCTGATTTATTTTTTAATAA  
AAAATTTTAAATATTTATAATTCTATTTAAAATATTTAAACTACGACGATATATAAAC  
TAATAAATAAAGTGCATCTAATCGTGGACTATCGATTATAGAACAGGTTCCCTCTG  
AAAAGACTAAAATACCGCCAAATTTTTTAATTTTCAAGAACATAACTAATACTAAT  
TAAGTAAAAAAATTTACATTTTTTAATAATAGGGTATCTAA

MEX\_SAG\_5

CGGGCGATGTGTACATATTTTAGAGCTTTAATCATCTTAAAAAAATCTAAAAAATT  
ACTCTCAAATCCAAATTTCAAATTTTTTTAACAAAAATTATTTTCAAATAAATTTATT  
GTAACCCATTTCTTCTTTATTATAAACTACACCTTGATCTGATTTATTTTTTAATAA  
AAAATTTTAAATATTTATAATTCTATTTAAAATATTTAAACTACGACGATATATAAAC  
TAATAAATAAAGTGCATCTAATCGTGGACTATCGATTATAGAACAGGTTCCCTCTG

AAAAGACTAAAATACCGCCAAATTTTTTAATTTTCAAGAACATAACTAATACTAAT  
TAAGTAAAAAAATTTACATTTTTTAATAATAGGGTATCTAA

MEX\_SCA

CGGGCGATGTGTACATATTTTAGAGCTTTAATCATCTTAAAAAATCTAAAAAATT  
ACTCTCAAATCCAAATTCAAATTTTTTTAACAAAAATTATTTTCAAATAAATTTATT  
GTAACCCATTTCTTCTTTATTATAAACTACACCTTGATCTGATTTATTTTTTAATAA  
AAAATTTTAAATATTTATAATTCTATTA AAAATATTTAAACTACGACGATATATAAAC  
TAATAAATAAAGTGCATCTAATCGTGGACTATCGATTATAGAACAGGTTCCCTCTG  
AAAAGACTAAAATACCGCCAAATTTTTTAATTTTCAAGAACATAACTAATACTAAT  
TAAGTAAAAAAATTTACATTTTTTAATAATAGGGTATCTAA

MEX\_SFP

CGGGCGATGTGTACATATTTTAGAGCTTTAATCATCTTAAAAAATCTAAAAAATT  
ACTCTCAAATCCAAATTCAAATTTTTTTAACAAAAATTATTTTCAAATAAATTTATT  
GTAACCCATTTCTTCTTTATTATAAACTACACCTTGATCTGATTTATTTTTTAATAA  
AAAATTTTAAATATTTATAATTCTATTA AAAATATTTAAACTACGACGATATATAAAC  
TAATAAATAAAGTGCATCTAATCGTGGACTATCGATTATAGAACAGGTTCCCTCTG  
AAAAGACTAAAATACCGCCAAATTTTTTAATTTTCAAGAACATAACTAATACTAAT  
TAAGTAAAAAAATTTACATTTTTTAATAATAGGGTATCTAA

MEX\_SJS\_2

CGGGCGATGTGTACATATTTTAGAGCTTTAATCATCTTAAAAAATCTAAAAAATT  
ACTCTCAAATCCAAATTCAAATTTTTTTAACAAAAATTATTTTCAAATAAATTTATT  
GTAACCCATTTCTTCTTTATTATAAACTACACCTTGATCTGATTTATTTTTTAATAA  
AAAATTTTAAATATTTATAATTCTATTA AAAATATTTAAACTACGACGATATATAAAC  
TAATAAATAAAGTGCATCTAATCGTGGACTATCGATTATAGAACAGGTTCCCTCTG  
AAAAGACTAAAATACCGCCAAATTTTTTAATTTTCAAGAACATAACTAATACTAAT  
TAAGTAAAAAAATTTACATTTTTTAATAATAGGGTATCTAA

MEX\_STO

CGGGCGATGTGTACATATTTTAGAGCTTTAATCATCTTAAAAAATCTAAAAAATT  
ACTCTCAAATCCAAATTCAAATTTTTTTAACAAAAATTATTTTCAAATAAATTTATT  
GTAACCCATTTCTTCTTTATTATAAACTACACCTTGATCTGATTTATTTTTTAATAA  
AAAATTTTAAATATTTATAATTCTATTA AAAATATTTAAACTACGACGATATATAAAC  
TAATAAATAAAGTGCATCTAATCGTGGACTATCGATTATAGAACAGGTTCCCTCTG  
AAAAGACTAAAATACCGCCAAATTTTTTAATTTTCAAGAACATAACTAATACTAAT  
TAAGTAAAAAAATTTACATTTTTTAATAATAGGGTATCTAA

MEX\_TLA\_1

CGGGCGATGTGTACATATTTTAGAGCTTTAATCATCTTAAAAAATCTAAAAAATT  
ACTCTCAAATCCAAATTCAAATTTTTTTAACAAAAATTATTTTCAAATAAATTTATT  
GTAACCCATTTCTTCTTTATTATAAACTACACCTTGATCTGATTTATTTTTTAATAA  
AAAATTTTAAATATTTATAATTCTATTA AAAATATTTAAACTACGACGATATATAAAC  
TAATAAATAAAGTGCATCTAATCGTGGACTATCGATTATAGAACAGGTTCCCTCTG  
AAAAGACTAAAATACCGCCAAATTTTTTAATTTTCAAGAACATAACTAATACTAAT  
TAAGTAAAAAAATTTACATTTTTTAATAATAGGGTATCTAA

MEX\_XOT\_3

CGGGCGATGTGTACATATTTTAGAGCTTTAATCATCTTAAAAAATCTAAAAAATT  
ACTCTCAAATCCAAATTCAAATTTTTTTAACAAAAATTATTTTAAATAAATTTATT  
GTAACCCATTTCTTCTTTATTATAAACTACACCTTGATCTGATTTATTTTTTAATAA  
AAAATTTTAAATATTTATAATTCTATTA AAAATATTTAAACTACGACGATATATAAAC  
TAATAAATAAAGTGCATCTAATCGTGGACTATCGATTATAGAACAGGTTCCCTCTG  
AAAAGACTAAAATACCGCCAAATTTTTTAATTTTCAAGAACATAACTAATACTAAT  
TAAGTAAAAAAATTTACATTTTTTAATAATAGGGTATCTAA

MEX\_YOH

CGGGCGATGTGTACATATTTTAGAGCTTTAATCATCTTAAAAAATCTAAAAAATT  
ACTCTCAAATCCAAATTCAAATTTTTTTAACAAAAATTATTTTCAAATAAATTTATT  
GTAACCCATTTCTTCTTTATTATAAACTACACCTTGATCTGATTTATTTTTTAATAA  
AAAATTTTAAATATTTATAATTCTATTAATAATTTAAACTACGACGATATATAAAC  
TAATAAATAAAGTGCATCTAATCGTGGACTATCGATTATAGAACAGGTTCCCTCTG  
AAAAGACTAAAATACCGCCAAATTTTTTAATTTTCAAGAACATAACTAATACTAAT  
TAAGTAAAAAATTTACATTTTTTAATAATAGGGTATCTAA

moc5

CGGGCGATGTGTACATATTTTAGAGCTTTAATCATCTTAAAAAATCTAAAAAATT  
ACTCTCAAATCCAAATTCAAATTTTTTTAACAAAAATTATTTTAAAATAAATTTATT  
GTAACCCATTTCTTCTTTATTATAAACTACACCTTGATCTGATTTATTTTTTAATAA  
AAAATTTTAAATATTTATAATTCTATTAATAATTTAAACTACGACGATATATAAAC  
TAATAAATAAAGTGCATCTAATCGTGGACTATCGATTATAGAACAGGTTCCCTCTG  
AAAAGACTAAAATACCGCCAAATTTTTTAATTTTCAAGAACATAACTAATACTAAT  
TAAGTAAAAAATTTACATTTTTTAATAATAGGGTATCTAA

PE2\_1

CGGGCGATGTGTACATATTTTAGAGCTTTAATCATCTTAAAAAATCTAAAAAATT  
ACTCTCAAATCCAAATTCAAATTTTTTTAACAAAAATTATTTTCAAATAAATTTATT  
GTAACCCATTTCTTCTTTATTATAAACTACACCTTGATCTGATTTATTTTTTAATAA  
AAAATTTTAAATATTTATAATTCTATTAATAATTTAAACTACGACGATATATAAAC  
TAATAAATAAAGTGCATCTAATCGTGGACTATCGATTATAGAACAGGTTCCCTCTG  
AAAAGACTAAAATACCGCCAAATTTTTTAATTTTCAAGAACATAACTAATACTAAT  
TAAGTAAAAAATTTACATTTTTTAATAATAGGGTATCTAA

PE2\_3

CGGGCGATGTGTACATATTTTAGAGCTTTAATCATCTTAAAAAATCTAAAAAATT  
ACTCTCAAATCCAAATTCAAATTTTTTTAACAAAAATTATTTTCAAATAAATTTATT  
GTAACCCATTTCTTCTTTATTATAAACTACACCTTGATCTGATTTATTTTTTAATAA  
AAAATTTTAAATATTTATAATTCTATTAATAATTTAAACTACGACGATATATAAAC  
TAATAAATAAAGTGCATCTAATCGTGGACTATCGATTATAGAACAGGTTCCCTCTG  
AAAAGACTAAAATACCGCCAAATTTTTTAATTTTCAAGAACATAACTAATACTAAT  
TAAGTAAAAAATTTACATTTTTTAATAATAGGGTATCTAA

PE2\_4

CGGGCGATGTGTACATATTTTAGAGCTTTAATCATCTTAAAAAATCTAAAAAATT  
ACTCTCAAATCCAAATTCAAATTTTTTTAACAAAAATTATTTTCAAATAAATTTATT  
GTAACCCATTTCTTCTTTATTATAAACTACACCTTGATCTGATTTATTTTTTAATAA  
AAAATTTTAAATATTTATAATTCTATTAATAATTTAAACTACGACGATATATAAAC  
TAATAAATAAAGTGCATCTAATCGTGGACTATCGATTATAGAACAGGTTCCCTCTG  
AAAAGACTAAAATACCGCCAAATTTTTTAATTTTCAAGAACATAACTAATACTAAT  
TAAGTAAAAAATTTACATTTTTTAATAATAGGGTATCTAA

PE2\_5

CGGGCGATGTGTACATATTTTAGAGCTTTAATCATCTTAAAAAATCTAAAAAATT  
ACTCTCAAATCCAAATTCAAATTTTTTTAACAAAAATTATTTTCAAATAAATTTATT  
GTAACCCATTTCTTCTTTATTATAAACTACACCTTGATCTGATTTATTTTTTAATAA  
AAAATTTTAAATATTTATAATTCTATTAATAATTTAAACTACGACGATATATAAAC  
TAATAAATAAAGTGCATCTAATCGTGGACTATCGATTATAGAACAGGTTCCCTCTG  
AAAAGACTAAAATACCGCCAAATTTTTTAATTTTCAAGAACATAACTAATACTAAT  
TAAGTAAAAAATTTACATTTTTTAATAATAGGGTATCTAA

PE2\_6

CGGGCGATGTGTACATATTTTAGAGCTTTAATCATCTTAAAAAATCTAAAAAATT

ACTCTCAAATCCAAATTCAAATTTTTTTAACAAAAATTATTTTCAAATAAATTTATT  
GTAACCCATTTCTTCTTTATTATAAACTACACCTTGATCTGATTTATTTTTTAATAA  
AAAATTTTAAATATTTATAATTCTATTAATAATTTAACTACGACGATATATAAAC  
TAATAAATAAAGTGACATCTAATCGTGGACTATCGATTATAGAACAGGTTCCCTCTG  
AAAAGACTAAAATACCGCCAAATTTTTTAATTTTCAAGAACATAACTAATACTAAT  
TAAGTAAAAAAATTTACATTTTTTAATAATAGGGTATCTAA

PE2\_7

CGGGCGATGTGTACATATTTTAGAGCTTTAATCATCTTAAAAAAATCTAAAAAATT  
ACTCTCAAATCCAAATTCAAATTTTTTTAACAAAAATTATTTTCAAATAAATTTATT  
GTAACCCATTTCTTCTTTATTATAAACTACACCTTGATCTGATTTATTTTTTAATAA  
AAAATTTTAAATATTTATAATTCTATTAATAATTTAACTACGACGATATATAAAC  
TAATAAATAAAGTGACATCTAATCGTGGACTATCGATTATAGAACAGGTTCCCTCTG  
AAAAGACTAAAATACCGCCAAATTTTTTAATTTTCAAGAACATAACTAATACTAAT  
TAAGTAAAAAAATTTACATTTTTTAATAATAGGGTATCTAA

PE\_MAN\_12

CGGGCGATGTGTACATATTTTAGAGCTTTAATCATCTTAAAAAAATCTAAAAAATT  
ACTCTCAAATCCAAATTCAAATTTTTTTAACAAAAATTATTTTCAAATAAATTTATT  
GTAACCCATTTCTTCTTTATTATAAACTACACCTTGATCTGATTTATTTTTTAATAA  
AAAATTTTAAATATTTATAATTCTATTAATAATTTAACTACGACGATATATAAAC  
TAATAAATAAAGTGACATCTAATCGTGGACTATCGATTATAGAACAGGTTCCCTCTG  
AAAAGACTAAAATACCGCCAAATTTTTTAATTTTCAAGAACATAACTAATACTAAT  
TAAGTAAAAAAATTTACATTTTTTAATAATAGGGTATCTAA

PE\_MAN\_13

CGGGCGATGTGTACATATTTTAGAGCTTTAATCATCTTAAAAAAATCTAAAAAATT  
ACTCTCAAATCCAAATTCAAATTTTTTTAACAAAAATTATTTTCAAATAAATTTATT  
GTAACCCATTTCTTCTTTATTATAAACTACACCTTGATCTGATTTATTTTTTAATAA  
AAAATTTTAAATATTTATAATTCTATTAATAATTTAACTACGACGATATATAAAC  
TAATAAATAAAGTGACATCTAATCGTGGACTATCGATTATAGAACAGGTTCCCTCTG  
AAAAGACTAAAATACCGCCAAATTTTTTAATTTTCAAGAACATAACTAATACTAAT  
TAAGTAAAAAAATTTACATTTTTTAATAATAGGGTATCTAA

PE\_MAN\_15

CGGGCGATGTGTACATATTTTAGAGCTTTAATCATCTTAAAAAAATCTAAAAAATT  
ACTCTCAAATCCAAATTCAAATTTTTTTAACAAAAATTATTTTCAAATAAATTTATT  
GTAACCCATTTCTTCTTTATTATAAACTACACCTTGATCTGATTTATTTTTTAATAA  
AAAATTTTAAATATTTATAATTCTATTAATAATTTAACTACGACGATATATAAAC  
TAATAAATAAAGTGACATCTAATCGTGGACTATCGATTATAGAACAGGTTCCCTCTG  
AAAAGACTAAAATACCGCCAAATTTTTTAATTTTCAAGAACATAACTAATACTAAT  
TAAGTAAAAAAATTTACATTTTTTAATAATAGGGTATCTAA

PE\_MAN\_16

CGGGCGATGTGTACATATTTTAGAGCTTTAATCATCTTAAAAAAATCTAAAAAATT  
ACTCTCAAATCCAAATTCAAATTTTTTTAACAAAAATTATTTTCAAATAAATTTATT  
GTAACCCATTTCTTCTTTATTATAAACTACACCTTGATCTGATTTATTTTTTAATAA  
AAAATTTTAAATATTTATAATTCTATTAATAATTTAACTACGACGATATATAAAC  
TAATAAATAAAGTGACATCTAATCGTGGACTATCGATTATAGAACAGGTTCCCTCTG  
AAAAGACTAAAATACCGCCAAATTTTTTAATTTTCAAGAACATAACTAATACTAAT  
TAAGTAAAAAAATTTACATTTTTTAATAATAGGGTATCTAA

PE\_MAN\_19

CGGGCGATGTGTACATATTTTAGAGCTTTAATCATCTTAAAAAAATCTAAAAAATT  
ACTCTCAAATCCAAATTCAAATTTTTTTAACAAAAATTATTTTCAAATAAATTTATT  
GTAACCCATTTCTTCTTTATTATAAACTACACCTTGATCTGATTTATTTTTTAATAA



AAAATTTTAAATATTTATAATTCTATTTAAAATATTTAAACTACGACGATATATAAAC  
TAATAAATAAAGTGCATCTAATCGTGGACTATCGATTATAGAACAGGTTCCCTCTG  
AAAAGACTAAAATACCGCCAAATTTTTTAATTTTCAAGAACATAACTAATACTAAT  
TAAGTAAAAAAATTTACATTTTTTAATAATAGGGTATCTAA

PE\_MAN\_2

CGGGCGATGTGTACATATTTTAGAGCTTTAATCATCTTAAAAAAATCTAAAAAATT  
ACTCTCAAATCCAAATTCAAATTTTTTTAACAAAAATTATTTTCAAATAAATTTATT  
GTAACCCATTTCTTCTTTATTATAAACTACACCTTGATCTGATTTATTTTTTAATAA  
AAAATTTTAAATATTTATAATTCTATTTAAAATATTTAAACTACGACGATATATAAAC  
TAATAAATAAAGTGCATCTAATCGTGGACTATCGATTATAGAACAGGTTCCCTCTG  
AAAAGACTAAAATACCGCCAAATTTTTTAATTTTCAAGAACATAACTAATACTAAT  
TAAGTAAAAAAATTTACATTTTTTAATAATAGGGTATCTAA

PE\_MAN\_23

CGGGCGATGTGTACATATTTTAGAGCTTTAATCATCTTAAAAAAATCTAAAAAATT  
ACTCTCAAATCCAAATTCAAATTTTTTTAACAAAAATTATTTTCAAATAAATTTATT  
GTAACCCATTTCTTCTTTATTATAAACTACACCTTGATCTGATTTATTTTTTAATAA  
AAAATTTTAAATATTTATAATTCTATTTAAAATATTTAAACTACGACGATATATAAAC  
TAATAAATAAAGTGCATCTAATCGTGGACTATCGATTATAGAACAGGTTCCCTCTG  
AAAAGACTAAAATACCGCCAAATTTTTTAATTTTCAAGAACATAACTAATACTAAT  
TAAGTAAAAAAATTTACATTTTTTAATAATAGGGTATCTAA

PE\_MAN\_29

CGGGCGATGTGTACATATTTTAGAGCTTTAATCATCTTAAAAAAATCTAAAAAATT  
ACTCTCAAATCCAAATTCAAATTTTTTTAACAAAAATTATTTTCAAATAAATTTATT  
GTAACCCATTTCTTCTTTATTATAAACTACACCTTGATCTGATTTATTTTTTAATAA  
AAAATTTTAAATATTTATAATTCTATTTAAAATATTTAAACTACGACGATATATAAAC  
TAATAAATAAAGTGCATCTAATCGTGGACTATCGATTATAGAACAGGTTCCCTCTG  
AAAAGACTAAAATACCGCCAAATTTTTTAATTTTCAAGAACATAACTAATACTAAT  
TAAGTAAAAAAATTTACATTTTTTAATAATAGGGTATCTAA

PE\_MAN\_6

CGGGCGATGTGTACATATTTTAGAGCTTTAATCATCTTAAAAAAATCTAAAAAATT  
ACTCTCAAATCCAAATTCAAATTTTTTTAACAAAAATTATTTTCAAATAAATTTATT  
GTAACCCATTTCTTCTTTATTATAAACTACACCTTGATCTGATTTATTTTTTAATAA  
AAAATTTTAAATATTTATAATTCTATTTAAAATATTTAAACTACGACGATATATAAAC  
TAATAAATAAAGTGCATCTAATCGTGGACTATCGATTATAGAACAGGTTCCCTCTG  
AAAAGACTAAAATACCGCCAAATTTTTTAATTTTCAAGAACATAACTAATACTAAT  
TAAGTAAAAAAATTTACATTTTTTAATAATAGGGTATCTAA

PE\_MAN\_8

CGGGCGATGTGTACATATTTTAGAGCTTTAATCATCTTAAAAAAATCTAAAAAATT  
ACTCTCAAATCCAAATTCAAATTTTTTTAACAAAAATTATTTTCAAATAAATTTATT  
GTAACCCATTTCTTCTTTATTATAAACTACACCTTGATCTGATTTATTTTTTAATAA  
AAAATTTTAAATATTTATAATTCTATTTAAAATATTTAAACTACGACGATATATAAAC  
TAATAAATAAAGTGCATCTAATCGTGGACTATCGATTATAGAACAGGTTCCCTCTG  
AAAAGACTAAAATACCGCCAAATTTTTTAATTTTCAAGAACATAACTAATACTAAT  
TAAGTAAAAAAATTTACATTTTTTAATAATAGGGTATCTAA

pit1

CGGGCGATGTGTACATATTTTAGAGCTTTAATCATCTTAAAAAAATCTAAAAAATT  
ACTCTCAAATCCAAATTCAAATTTTTTTAACAAAAATTATTTTAAAATAAATTTATT  
GTAACCCATTTCTTCTTTATTATAAACTACACCTTGATCTGATTTATTTTTTAATAA  
AAAATTTTAAATATTTATAATTCTATTTAAAATATTTAAACTACGACGATATATAAAC  
TAATAAATAAAGTGCATCTAATCGTGGACTATCGATTATAGAACAGGTTCCCTCTG

AAAAGACTAAAATACCGCCAAATTTTTTAATTTTCAAGAACATAACTAATACTAAT  
TAAGTAAAAAAATTTACATTTTTTAATAATAGGGTATCTAA

pit2

CGGGCGATGTGTACATATTTTAGAGCTTTAATCATCTTAAAAAAATCTAAAAAATT  
ACTCTCAAATCCAAATTCAAATTTTTTTAACAAAAATTATTTTAAAATAAATTTATT  
GTAACCCATTTCTTCTTTATTATAAACTACACCTTGATCTGATTTATTTTTTAATAA  
AAAATTTTAAATATTTATAATTCTATTAATAATTTTAACTACGACGATATATAAAC  
TAATAAATAAAGTGATCTAATCGTGGACTATCGATTATAGAACAGGTTCCCTCTG  
AAAAGACTAAAATACCGCCAAATTTTTTAATTTTCAAGAACATAACTAATACTAAT  
TAAGTAAAAAAATTTACATTTTTTAATAATAGGGTATCTAA

pit4

CGGGCGATGTGTACATATTTTAGAGCTTTAATCATCTTAAAAAAATCTAAAAAATT  
ACTCTCAAATCCAAATTCAAATTTTTTTAACAAAAATTATTTTAAAATAAATTTATT  
GTAACCCATTTCTTCTTTATTATAAACTACACCTTGATCTGATTTATTTTTTAATAA  
AAAATTTTAAATATTTATAATTCTATTAATAATTTTAACTACGACGATATATAAAC  
TAATAAATAAAGTGATCTAATCGTGGACTATCGATTATAGAACAGGTTCCCTCTG  
AAAAGACTAAAATACCGCCAAATTTTTTAATTTTCAAGAACATAACTAATACTAAT  
TAAGTAAAAAAATTTACATTTTTTAATAATAGGGTATCTAA

ron3

CGGGCGATGTGTACATATTTTAGAGCTTTAATCATCTTAAAAAAATCTAAAAAATT  
ACTCTCAAATCCAAATTCAAATTTTTTTAACAAAAATTATTTTAAAATAAATTTATT  
GTAACCCATTTCTTCTTTATTATAAACTACACCTTGATCTGATTTATTTTTTAATAA  
AAAATTTTAAATATTTATAATTCTATTAATAATTTTAACTACGACGATATATAAAC  
TAATAAATAAAGTGATCTAATCGTGGACTATCGATTATAGAACAGGTTCCCTCTG  
AAAAGACTAAAATACCGCCAAATTTTTTAATTTTCAAGAACATAACTAATACTAAT  
TAAGTAAAAAAATTTACATTTTTTAATAATAGGGTATCTAA

sob1

CGGGCGATGTGTACATATTTTAGAGCTTTAATCATCTTAAAAAAATCTAAAAAATT  
ACTCTCAAATCCAAATTCAAATTTTTTTAACAAAAATTATTTTAAAATAAATTTATT  
GTAACCCATTTCTTCTTTATTATAAACTACACCTTGATCTGATTTATTTTTTAATAA  
AAAATTTTAAATATTTATAATTCTATTAATAATTTTAACTACGACGATATATAAAC  
TAATAAATAAAGTGATCTAATCGTGGACTATCGATTATAGAACAGGTTCCCTCTG  
AAAAGACTAAAATACCGCCAAATTTTTTAATTTTCAAGAACATAACTAATACTAAT  
TAAGTAAAAAAATTTACATTTTTTAATAATAGGGTATCTAA

SPA\_PRA\_1

CGGGCGATGTGTACATATTTTAGAGCTTTAATCATCTTAAAAAAATCTAAAAAATT  
ACTCTCAAATCCAAATTCAAATTTTTTTAACAAAAATTATTTTAAAATAAATTTATT  
GTAACCCATTTCTTCTTTATTATAAACTACACCTTGATCTGATTTATTTTTTAATAA  
AAAATTTTAAATATTTATAATTCTATTAATAATTTTAACTACGACGATATATAAAC  
TAATAAATAAAGTGATCTAATCGTGGACTATCGATTATAGAACAGGTTCCCTCTG  
AAAAGACTAAAATACCGCCAAATTTTTTAATTTTCAAGAACATAACTAATACTAAT  
TAAGTAAAAAAATTTACATTTTTTAATAATAGGGTATCTAA

SWI\_NEU\_1

CGGGCGATGTGTACATATTTTAGAGCTTTAATCATCTTAAAAAAATCTAAAAAATT  
ACTCTCAAATCCAAATTCAAATTTTTTTAACAAAAATTATTTTAAAATAAATTTATT  
GTAACCCATTTCTTCTTTATTATAAACTACACCTTGATCTGATTTATTTTTTAATAA  
AAAATTTTAAATATTTATAATTCTATTAATAATTTTAACTACGACGATATATAAAC  
TAATAAATAAAGTGATCTAATCGTGGACTATCGATTATAGAACAGGTTCCCTCTG  
AAAAGACTAAAATACCGCCAAATTTTTTAATTTTCAAGAACATAACTAATACTAAT  
TAAGTAAAAAAATTTACATTTTTTAATAATAGGGTATCTAA

tol1

CGGGCGATGTGTACATATTTTAGAGCTTTAATCATCTTAAAAAATCTAAAAATT  
ACTCTCAAATCCAAATTCAAATTTTTTAAACAAAAATTATTTTAAAATAAATTTATT  
GTAACCCATTTCTTCTTTATTATAAACTACACCTTGATCTGATTTATTTTTAATAA  
AAAATTTTAAATATTTATAATTCTATTAATAATTTAACTACGACGATATATAAAC  
TAATAAATAAAGTGATCTAATCGTGGACTATCGATTATAGAACAGGTTCCCTCTG  
AAAAGACTAAAATACCGCCAAATTTTTAATTTCAAGAACATAACTAATACTAAT  
TAAGTAAAAAATTTACATTTTTAATAATAGGGTATCTAA

;

endblock;

## datasetS2

#NEXUS

begin data;  
dimensions ntax=56 nchar=465;  
format datatype=dna gap=- interleave=no;  
matrix

afr19

CAGACCTAATATTTCCAGCTTCTGCACCAAAAATTAATTTTAATCCAACATCGAG  
GTCGCAATCTTTATCTTCGATTAGAACTCTTTGATAATATTACGCTGTTATCCCTA  
AGGTAATTAATCTTACAATTACTAATAGCTCAAGTATACATAAATTAATGATT  
TAAATTTAAAAAAGTTCAATTAATTTTTCAATCACCCCAATTAATAATTAAAAA  
ATTAATAATTTTTATACTaAAAAAAAATTAATAATTTTTAAATATGAAACTCTATAGG  
GTCTTCTCGTCTTTTAAATTAATTTTAGCTTTTTAACTAAAAATAAATTTTTAATG  
TTAAATAGAGACAGAAATTTTTTATCCAACCATTCAATCCAGCTTCTAATTAAG  
AACTAATGATTATGCTACCTTAGCACGGTCAAATACCGCGGCCATTTAAATCC  
TCAGAGGGCAGGCTA

afr9

CAGACCTAATATTTCCAGCTTCTGCACCAAAAATTAATTTTAATCCAACATCGAG  
GTCGCAATCTTTATCTTCGATTAGAACTCTTTGATAATATTACGCTGTTATCCCTA  
AGGTAATTAATCTTACAATTACTAATAGCTCAAGTATACATAAATTAATGATT  
TAAATTTAAAAAAGTTTCGATTAATTTTTCAATCACCCCAATTAATAATTAAAAA  
ATTAATAATTTTTATACTaAAAAAAAATTAATAATTTTTAAATATGAAACTCTATAGG  
GTCTTCTCGTCTTTTAAATTAATCTTAGCTTTTTAACTAAAAATAAATTTTTAATG  
TTAAATAGAGACAGAAATTTTTTATCCAACCATTCAATCCAGCTTCTAATTAAG  
AACTAATGATTATGCTACCTTAGCACGGTCAAATACCGCGGCCATTTAAATCC  
TCAGAGGGCAGGCTA

AOPE\_12

CAGACCTAATATCCCCAGCTTCTACACCAAAAATTAATTTTAATCCAACATCGAG  
GTCGCAATCTTTATCTTCGATTAGAACTCTTTGATAATATTACGCTGTTATCCCTA  
AGGTAATTAATCTTACAATTACTAATAGCTCAAGTATACATAAATTAATGATT  
TAAATTTAAAAAAGTTCAATTAATTTTTCAATCACCCCAATTAATAATTAAAAA  
ATTAATAATTTTTATACTaAAAAAAAATTAATAATTTTTAAATATGAAACTCTATAGG  
GTCTTCTCGTCTTTTAAATTAATTTTAGCTTTTTAACTAAAAATAAATTTTTAATG  
TTAAATAGAGACAGAAATTTTTTATCCAACCATTCAATCCAGCTTCTAATTAAG  
AACTAATGATTATGCTACCTTAGCACGGTCAAATACCGCGGCCATTTAAATCC  
TCAGAGGGCAGGCTA

AOPE\_13

CAGACCTAATATCCCCAGCTTCTACACCAAAAATTAATTTTAATCCAACATCGAG  
GTCGCAATCTTTATCTTCGATTAGAACTCTTTGATAATATTACGCTGTTATCCCTA  
AGGTAATTAATCTTACAATTACTAATAGCTCAAGTATACATAAATTAATGATT  
TAAATTTAAAAAAGTTCAATTAATTTTTCAATCACCCCAATTAATAATTAAAAA  
ATTAATAATTTTTATACTaAAAAAAAATTAATAATTTTTAAATATGAAACTCTATAGG  
GTCTTCTCGTCTTTTAAATTAATTTTAGCTTTTTAACTAAAAATAAATTTTTAATG  
TTAAATAGAGACAGAAATTTTTTATCCAACCATTCAATCCAGCTTCTAATTAAG  
AACTAATGATTATGCTACCTTAGCACGGTCAAATACCGCGGCCATTTAAATCC  
TCAGAGGGCAGGCTA

AOPE\_14

CAGACCTAATATCCCCAGCTTCTACACCAAAAATTAATTTTAATCCAACATCGAG  
GTCGCAATCTTTATCTTCGATTAGAACTCTTTGATAATATTACGCTGTTATCCCTA  
AGGTAATTAATCTTACAATTATTACTAATAGCTCAAGTATACATAAATTAATGATT  
TAAATTTAAAAAAGTTCAATTAATTTTTCAATCACCCCAATTAATAATTAAAAAA  
ATTA AAAAATTTTTATACTaAAAAAAAATTA AAAATTTTTAAATATGAAACTCTATAGG  
GTCTTCTCGTCTTTTAAATTAATTTTAGCTTTTTAACTAAAAAATAAATTTTTAATG  
TTTTAAATAGAGACAGAAATTTTTTATCCAACCATTCCATTCCAGCTTCTAATTAAG  
AAACTAATGATTATGCTACCTTAGCACGGTCAAATACCGCGGCCATTTAAATCC  
TCAGAGGGCAGGCTA

AOPE\_4

CAGACCTAATATCCCCAGCTTCTACACCAAAAATTAATTTTAATCCAACATCGAG  
GTCGCAATCTTTATCTTCGATTAGAACTCTTTGATAATATTACGCTGTTATCCCTA  
AGGTAATTAATCTTACAATTATTACTAATAGCTCAAGTATACATAAATTAATGATT  
TAAATTTAAAAAAGTTCAATTAATTTTTCAATCACCCCAATTAATAATTAAAAAA  
ATTA AAAAATTTTTATACTaAAAAAAAATTA AAAATTTTTAAATATGAAACTCTATAGG  
GTCTTCTCGTCTTTTAAATTAATTTTAGCTTTTTAACTAAAAAATAAATTTTTAATG  
TTTTAAATAGAGACAGAAATTTTTTATCCAACCATTCCATTCCAGCTTCTAATTAAG  
AAACTAATGATTATGCTACCTTAGCACGGTCAAATACCGCGGCCATTTAAATCC  
TCAGAGGGCAGGCTA

bjal

CAGACCTAATATTTCCAGCTTCTGCACCAAAAATTAATTTTAATCCAACATCGAG  
GTCGCAATCTTTATCTTCGATTAGAACTCTTTGATAATATTACGCTGTTATCCCTA  
AGGTAATTAATCTTACAATTATTACTAATAGCTCAAGTATACATAAATTAATGATT  
TAAATTTAAAAAAGTTCAATTAATTTTTCAATCACCCCAATTAATAATTAAAAAA  
ATTA AAAAATTTTTATACTaAAAAAAAATTA AAAATTTTTAAATATGAAACTCTATAGG  
GTCTTCTCGTCTTTTAAATTAATTTTAGCTTTTTAACTAAAAAATAAATTTTTAATG  
TTTTAAATAGAGACAGAAATTTTTTATCCAACCATTCCATTCCAGCTTCTAATTAAG  
AAACTAATGATTATGCTACCTTAGCACGGTCAAATACCGCGGCCATTTAAATCC  
TCAGAGGGCAGGCTA

CAM\_YAH

CAGACCTAATATTTCCAGCTTCTGCACCAAAAATTAATTTTAATCCAACATCGAG  
GTCGCAATCTTTATCTTCGATTAGAACTCTTTGATAATATTACGCTGTTATCCCTA  
AGGTAATTAATCTTACAATTATTACTAATAGCTCAAGTATACATAAATTAATGATT  
TAAATTTAAAAAAGTTCGATTAATTTTTCAATCACCCCAATTAATAATTAAAAAA  
ATTA AAAAATTTTTATACTaAAAAAAAATTA AAAATTTTTAAATATGAAACTCTATAGG  
GTCTTCTCGTCTTTTAAATTAATCTTAGCTTTTTAACTAAAAAATAAATTTTTAATG  
TTTTAAATAGAGACAGAAATTTTTTATCCAACCATTCCATTCCAGCTTCTAATTAAG  
AAACTAATGATTATGCTACCTTAGCACGGTCAAATACCGCGGCCATTTAAATCC  
TCAGAGGGCAGGCTA

CL1\_1

CAGACCTAATATCCCCAGCTTCTACACCAAAAATTAATTTTAATCCAACATCGAG  
GTCGCAATCTTTATCTTCGATTAGAACTCTTTGATAATATTACGCTGTTATCCCTA  
AGGTAATTAATCTTACAATTATTACTAATAGCTCAAGTATACATAAATTAATGATT  
TAAATTTAAAAAAGTTCAATTAATTTTTCAATCACCCCAATTAATAATTAAAAAA  
ATTA AAAAATTTTTATACTAAAAAAAATTA AAAATTTTTAAATATGAAACTCTATAGG  
GTCTTCTCGTCTTTTAAATTAATTTTAGCTTTTTAACTAAAAAATAAATTTTTAATG  
TTTTAAATAGAGACAGAAATTTTTTATCCAACCATTCCATTCCAGCTTCTAATTAAG  
AAACTAATGATTATGCTACCTTAGCACGGTCAAATACCGCGGCCATTTAAATCC  
TCAGAGGGCAGGCTA

CL1\_2

CAGACCTAATATCCCCAGCTTCTACACCAAAAATTAATTTTAATCCAACATCGAG  
GTCGCAATCTTTATCTTCGATTAGAACTCTTTGATAATATTACGCTGTTATCCCTA  
AGGTAATTAATCTTACAATTACTAATAGCTCAAGTATACATAAATTAATGATT  
TAAATTTAAAAAAAGTTCAATTAATTTTTCAATCACCCCAATTAATAATTAAAAA  
ATTA AAAATTTTTATACTAAAAAAAATTA AAAATTTTTAAATATGAAACTCTATAGG  
GTCTTCTCGTCTTTTAAATTAATTTTAGCTTTTTAACTAAAAAATAAATTTTTAATG  
TTTTAAATAGAGACAGAAATTTTTTATCCAACCATTCCAGCTTCTAATTAAG  
AACTAATGATTATGCTACCTTAGCACGGTCAAATACCGCGGCCATTTAAATCC  
TCAGAGGGCAGGCTA

CL1\_3

CAGACCTAATATCCCCAGCTTCTACACCAAAAATTAATTTTAATCCAACATCGAG  
GTCGCAATCTTTATCTTCGATTAGAACTCTTTGATAATATTACGCTGTTATCCCTA  
AGGTAATTAATCTTACAATTACTAATAGCTCAAGTATACATAAATTAATGATT  
TAAATTTAAAAAAAGTTCAATTAATTTTTCAATCACCCCAATTAATAATTAAAAA  
ATTA AAAATTTTTATACTAAAAAAAATTA AAAATTTTTAAATATGAAACTCTATAGG  
GTCTTCTCGTCTTTTAAATTAATTTTAGCTTTTTAACTAAAAAATAAATTTTTAATG  
TTTTAAATAGAGACAGAAATTTTTTATCCAACCATTCCAGCTTCTAATTAAG  
AACTAATGATTATGCTACCTTAGCACGGTCAAATACCGCGGCCATTTAAATCC  
TCAGAGGGCAGGCTA

CL1\_4

CAGACCTAATATCCCCAGCTTCTACACCAAAAATTAATTTTAATCCAACATCGAG  
GTCGCAATCTTTATCTTCGATTAGAACTCTTTGATAATATTACGCTGTTATCCCTA  
AGGTAATTAATCTTACAATTACTAATAGCTCAAGTATACATAAATTAATGATT  
TAAATTTAAAAAAAGTTCAATTAATTTTTCAATCACCCCAATTAATAATTAAAAA  
ATTA AAAATTTTTATACTAAAAAAAATTA AAAATTTTTAAATATGAAACTCTATAGG  
GTCTTCTCGTCTTTTAAATTAATTTTAGCTTTTTAACTAAAAAATAAATTTTTAATG  
TTTTAAATAGAGACAGAAATTTTTTATCCAACCATTCCAGCTTCTAATTAAG  
AACTAATGATTATGCTACCTTAGCACGGTCAAATACCGCGGCCATTTAAATCC  
TCAGAGGGCAGGCTA

CL1\_5

CAGACCTAATATCCCCAGCTTCTACACCAAAAATTAATTTTAATCCAACATCGAG  
GTCGCAATCTTTATCTTCGATTAGAACTCTTTGATAATATTACGCTGTTATCCCTA  
AGGTAATTAATCTTACAATTACTAATAGCTCAAGTATACATAAATTAATGATT  
TAAATTTAAAAAAAGTTCAATTAATTTTTCAATCACCCCAATTAATAATTAAAAA  
ATTA AAAATTTTTATACTAAAAAAAATTA AAAATTTTTAAATATGAAACTCTATAGG  
GTCTTCTCGTCTTTTAAATTAATTTTAGCTTTTTAACTAAAAAATAAATTTTTAATG  
TTTTAAATAGAGACAGAAATTTTTTATCCAACCATTCCAGCTTCTAATTAAG  
AACTAATGATTATGCTACCTTAGCACGGTCAAATACCGCGGCCATTTAAATCC  
TCAGAGGGCAGGCTA

CL1\_6

CAGACCTAATATCCCCAGCTTCTACACCAAAAATTAATTTTAATCCAACATCGAG  
GTCGCAATCTTTATCTTCGATTAGAACTCTTTGATAATATTACGCTGTTATCCCTA  
AGGTAATTAATCTTACAATTACTAATAGCTCAAGTATACATAAATTAATGATT  
TAAATTTAAAAAAAGTTCAATTAATTTTTCAATCACCCCAATTAATAATTAAAAA  
ATTA AAAATTTTTATACTAAAAAAAATTA AAAATTTTTAAATATGAAACTCTATAGG  
GTCTTCTCGTCTTTTAAATTAATTTTAGCTTTTTAACTAAAAAATAAATTTTTAATG  
TTTTAAATAGAGACAGAAATTTTTTATCCAACCATTCCAGCTTCTAATTAAG  
AACTAATGATTATGCTACCTTAGCACGGTCAAATACCGCGGCCATTTAAATCC  
TCAGAGGGCAGGCTA

CL1\_7

CAGACCTAATATCCCCAGCTTCTACACCAAAAATTAATTTTAATCCAACATCGAG  
GTCGCAATCTTTATCTTCGATTAGAACTCTTTGATAATATTACGCTGTTATCCCTA  
AGGTAATTAATCTTACAATTATTACTAATAGCTCAAGTATACATAAATTAATGATT  
TAAATTTAAAAAAGTTCAATTAATTTTTCAATCACCCCAATTAATAATTAAAAA  
ATTAATAATTTTTATACTAAAAAAAATTAATAATTTTTAAATATGAAACTCTATAGG  
GTCTTCTCGTCTTTTAAATTAATTTTAGCTTTTTAACTAAAAAATAAATTTTTAATG  
TTTTAATAGAGACAGAAATTTTTTATCCAACCATTCCAGCTTCTAATTAAG  
AACTAATGATTATGCTACCTTAGCACGGTCAAATACCGCGGCCATTTAAATCC  
TCAGAGGGCAGGCTA

CL1\_8

CAGACCTAATATCCCCAGCTTCTACACCAAAAATTAATTTTAATCCAACATCGAG  
GTCGCAATCTTTATCTTCGATTAGAACTCTTTGATAATATTACGCTGTTATCCCTA  
AGGTAATTAATCTTACAATTATTACTAATAGCTCAAGTATACATAAATTAATGATT  
TAAATTTAAAAAAGTTCAATTAATTTTTCAATCACCCCAATTAATAATTAAAAA  
ATTAATAATTTTTATACTAAAAAAAATTAATAATTTTTAAATATGAAACTCTATAGG  
GTCTTCTCGTCTTTTAAATTAATTTTAGCTTTTTAACTAAAAAATAAATTTTTAATG  
TTTTAATAGAGACAGAAATTTTTTATCCAACCATTCCAGCTTCTAATTAAG  
AACTAATGATTATGCTACCTTAGCACGGTCAAATACCGCGGCCATTTAAATCC  
TCAGAGGGCAGGCTA

CL1\_9

CAGACCTAATATCCCCAGCTTCTACACCAAAAATTAATTTTAATCCAACATCGAG  
GTCGCAATCTTTATCTTCGATTAGAACTCTTTGATAATATTACGCTGTTATCCCTA  
AGGTAATTAATCTTACAATTATTACTAATAGCTCAAGTATACATAAATTAATGATT  
TAAATTTAAAAAAGTTCAATTAATTTTTCAATCACCCCAATTAATAATTAAAAA  
ATTAATAATTTTTATACTAAAAAAAATTAATAATTTTTAAATATGAAACTCTATAGG  
GTCTTCTCGTCTTTTAAATTAATTTTAGCTTTTTAACTAAAAAATAAATTTTTAATG  
TTTTAATAGAGACAGAAATTTTTTATCCAACCATTCCAGCTTCTAATTAAG  
AACTAATGATTATGCTACCTTAGCACGGTCAAATACCGCGGCCATTTAAATCC  
TCAGAGGGCAGGCTA

CL2\_1

CAGACCTAATATCCCCAGCTTCTACACCAAAAATTAATTTTAATCCAACATCGAG  
GTCGCAATCTTTATCTTCGATTAGAACTCTTTGATAATATTACGCTGTTATCCCTA  
AGGTAATTAATCTTACAATTATTACTAATAGCTCAAGTATACATAAATTAATGATT  
TAAATTTAAAAAAGTTCAATTAATTTTTCAATCACCCCAATTAATAATTAAAAA  
ATTAATAATTTTTATACTAAAAAAAATTAATAATTTTTAAATATGAAACTCTATAGG  
GTCTTCTCGTCTTTTAAATTAATTTTAGCTTTTTAACTAAAAAATAAATTTTTAATG  
TTTTAATAGAGACAGAAATTTTTTATCCAACCATTCCAGCTTCTAATTAAG  
AACTAATGATTATGCTACCTTAGCACGGTCAAATACCGCGGCCATTTAAATCC  
TCAGAGGGCAGGCTA

CL2\_2

CAGACCTAATATCCCCAGCTTCTACACCAAAAATTAATTTTAATCCAACATCGAG  
GTCGCAATCTTTATCTTCGATTAGAACTCTTTGATAATATTACGCTGTTATCCCTA  
AGGTAATTAATCTTACAATTATTACTAATAGCTCAAGTATACATAAATTAATGATT  
TAAATTTAAAAAAGTTCAATTAATTTTTCAATCACCCCAATTAATAATTAAAAA  
ATTAATAATTTTTATACTAAAAAAAATTAATAATTTTTAAATATGAAACTCTATAGG  
GTCTTCTCGTCTTTTAAATTAATTTTAGCTTTTTAACTAAAAAATAAATTTTTAATG  
TTTTAATAGAGACAGAAATTTTTTATCCAACCATTCCAGCTTCTAATTAAG  
AACTAATGATTATGCTACCTTAGCACGGTCAAATACCGCGGCCATTTAAATCC  
TCAGAGGGCAGGCTA

EQU\_5

CAGACCTAATATCCCCAGCTTCTACACCAAAAATTAATTTTAATCCAACATCGAG  
GTCGCAATCTTTATCTTCGATTAGAACTCTTTGATAATATTACGCTGTTATCCCTA  
AGGTAATTAATCTTACAATTATTACTAATAGCTCAAGTATACATAAATTAATGATT  
TAAATTTAAAAAAGTTCAATTAATTTTTCAATCACCCCAATTAATAATTAAAAAA  
ATTA AAAAATTTTTATACTAAAAAAAATTA AAAATTTTTAAATATGAAACTCTATAGG  
GTCTTCTCGTCTTTTAAATTAATTTTAGCTTTTTAACTAAAAAATAAATTTTTAATG  
TTTTAAATAGAGACAGAAATTTTTTATCCAACCATTCCAGCTTCTAATTAAG  
AAACTAATGATTATGCTACCTTAGCACGGTCAAATACCGCGGCCATTTAAATCC  
TCAGAGGGCAGGCTA

FRA\_CHA\_5

CAGACCTAATATTTCCAGCTTCTGCACCAAAAATTAATTTTAATCCAACATCGAG  
GTCGCAATCTTTATCTTCGATTAGAACTCTTTGATAATATTACGCTGTTATCCCTA  
AGGTAATTAATCTTACAATTATTACTAATAGCTCAAGTATACATAAATTAATGATT  
TAAATTTAAAAAAGTTGATTAATTTTTCAATCACCCCAATTAATAATTAAAAAA  
ATTA AAAAATTTTTATACTaAAAAAAAATTA AAAATTTTTAAATATGAAACTCTATAGG  
GTCTTCTCGTCTTTTAAATTAATCTTAGCTTTTTAACTAAAAAATAAATTTTTAATG  
TTTTAAATAGAGACAGAAATTTTTTATCCAACCATTCCAGCTTCTAATTAAG  
AAACTAATGATTATGCTACCTTAGCACGGTCAAATACCGCGGCCATTTAAATCC  
TCAGAGGGCAGGCTA

hev1

CAGACCTAATATTTCCAGCTTCTGCACCAAAAATTAATTTTAATCCAACATCGAG  
GTCGCAATCTTTATCTTCGATTAGAACTCTTTGATAATATTACGCTGTTATCCCTA  
AGGTAATTAATCTTACAATTATTACTAATAGCTCAAGTATACATAAATTAATGATT  
TAAATTTAAAAAAGTTCAATTAATTTTTCAATCACCCCAATTAATAATTAAAAAA  
ATTA AAAAATTTTTATACTaAAAAAAAATTA AAAATTTTTAAATATGAAACTCTATAGG  
GTCTTCTCGTCTTTTAAATTAATTTTAGCTTTTTAACTAAAAAATAAATTTTTAATG  
TTTTAAATAGAGACAGAAATTTTTTATCCAACCATTCCAGCTTCTAATTAAG  
AAACTAATGATTATGCTACCTTAGCACGGTCAAATACCGCGGCCATTTAAATCC  
TCAGAGGGCAGGCTA

MEX\_COE\_2

CAGACCTAATATTTCCAGCTTCTGCACCAAAAATTAATTTTAATCCAACATCGAG  
GTCGCAATCTTTATCTTCGATTAGAACTCTTTGATAATATTACGCTGTTATCCCTA  
AGGTAATTAATCTTACAATTATTACTAATAGCTCAAGTATACATAAATTAATGATT  
TAAATTTAAAAAAGTTCAATTAATTTTTCAATCACCCCAATTAATAATTAAAAAA  
ATTA AAAAATTTTTATACTaAAAAAAAATTA AAAATTTTTAAATATGAAACTCTATAGG  
GTCTTCTCGTCTTTTAAATTAATTTTAGCTTTTTAACTAAAAAATAAATTTTTAATG  
TTTTAAATAGAGACAGAAATTTTTTATCCAACCATTCCAGCTTCTAATTAAG  
AAACTAATGATTATGCTACCTTAGCACGGTCAAATACCGCGGCCATTTAAATCC  
TCAGAGGGCAGGCTA

MEX\_SAG\_5

CAGACCTAATATTTCCAGCTTCTGCACCAAAAATTAATTTTAATCCAACATCGAG  
GTCGCAATCTTTATCTTCGATTAGAACTCTTTGATAATATTACGCTGTTATCCCTA  
AGGTAATTAATCTTACAATTATTACTAATAGCTCAAGTATACATAAATTAATGATT  
TAAATTTAAAAAAGTTCAATTAATTTTTCAATCACCCCAATTAATAATTAAAAAA  
ATTA AAAAATTTTTATACTaAAAAAAAATTA AAAATTTTTAAATATGAAACTCTATAGG  
GTCTTCTCGTCTTTTAAATTAATTTTAGCTTTTTAACTAAAAAATAAATTTTTAATG  
TTTTAAATAGAGACAGAAATTTTTTATCCAACCATTCCAGCTTCTAATTAAG  
AAACTAATGATTATGCTACCTTAGCACGGTCAAATACCGCGGCCATTTAAATCC  
TCAGAGGGCAGGCTA



MEX\_SCA

CAGACCTAATATTCCCAGCTTCTGCACCAAAAATTAATTTTAATCCAACATCGAG  
GTCGCAATCTTTATCTTCGATTAGAACTCTTTGATAATATTACGCTGTTATCCCTA  
AGGTAATTAATCTTACAATTATTACTAATAGCTCAAGTATACATAAATTAATGATT  
TAAATTTAAAAAAGTTCAATTAATTTTTCAATCACCCCAATTAATAATTAAAAAA  
ATTA AAAAATTTTTATACTaAAAAAAAATTA AAAATTTTTAAATATGAAACTCTATAGG  
GTCTTCTCGTCTTTTAAATTAATTTTAGCTTTTTAACTAAAAAATAAATTTTTAATG  
TTTTAAATAGAGACAGAAATTTTTTATCCAACCATTCCATTCCAGCTTCTAATTAAG  
AACTAATGATTATGCTACCTTAGCACGGTCAAATACCGCGGCCATTTAAATCC  
TCAGAGGGCAGGCTA

MEX\_SFP

CAGACCTAATATTCCCAGCTTCTGCACCAAAAATTAATTTTAATCCAACATCGAG  
GTCGCAATCTTTATCTTCGATTAGAACTCTTTGATAATATTACGCTGTTATCCCTA  
AGGTAATTAATCTTACAATTATTACTAATAGCTCAAGTATACATAAATTAATGATT  
TAAATTTAAAAAAGTTCAATTAATTTTTCAATCACCCCAATTAATAATTAAAAAA  
ATTA AAAAATTTTTATACTaAAAAAAAATTA AAAATTTTTAAATATGAAACTCTATAGG  
GTCTTCTCGTCTTTTAAATTAATTTTAGCTTTTTAACTAAAAAATAAATTTTTAATG  
TTTTAAATAGAGACAGAAATTTTTTATCCAACCATTCCATTCCAGCTTCTAATTAAG  
AACTAATGATTATGCTACCTTAGCACGGTCAAATACCGCGGCCATTTAAATCC  
TCAGAGGGCAGGCTA

MEX\_SJS\_2

CAGACCTAATATTCCCAGCTTCTGCACCAAAAATTAATTTTAATCCAACATCGAG  
GTCGCAATCTTTATCTTCGATTAGAACTCTTTGATAATATTACGCTGTTATCCCTA  
AGGTAATTAATCTTACAATTATTACTAATAGCTCAAGTATACATAAATTAATGATT  
TAAATTTAAAAAAGTTCAATTAATTTTTCAATCACCCCAATTAATAATTAAAAAA  
ATTA AAAAATTTTTATACTaAAAAAAAATTA AAAATTTTTAAATATGAAACTCTATAGG  
GTCTTCTCGTCTTTTAAATTAATTTTAGCTTTTTAACTAAAAAATAAATTTTTAATG  
TTTTAAATAGAGACAGAAATTTTTTATCCAACCATTCCATTCCAGCTTCTAATTAAG  
AACTAATGATTATGCTACCTTAGCACGGTCAAATACCGCGGCCATTTAAATCC  
TCAGAGGGCAGGCTA

MEX\_STO

CAGACCTAATATTCCCAGCTTCTGCACCAAAAATTAATTTTAATCCAACATCGAG  
GTCGCAATCTTTATCTTCGATTAGAACTCTTTGATAATATTACGCTGTTATCCCTA  
AGGTAATTAATCTTACAATTATTACTAATAGCTCAAGTATACATAAATTAATGATT  
TAAATTTAAAAAAGTTCAATTAATTTTTCAATCACCCCAATTAATAATTAAAAAA  
ATTA AAAAATTTTTATACTaAAAAAAAATTA AAAATTTTTAAATATGAAACTCTATAGG  
GTCTTCTCGTCTTTTAAATTAATTTTAGCTTTTTAACTAAAAAATAAATTTTTAATG  
TTTTAAATAGAGACAGAAATTTTTTATCCAACCATTCCATTCCAGCTTCTAATTAAG  
AACTAATGATTATGCTACCTTAGCACGGTCAAATACCGCGGCCATTTAAATCC  
TCAGAGGGCAGGCTA

MEX\_TLA\_1

CAGACCTAATATTCCCAGCTTCTGCACCAAAAATTAATTTTAATCCAACATCGAG  
GTCGCAATCTTTATCTTCGATTAGAACTCTTTGATAATATTACGCTGTTATCCCTA  
AGGTAATTAATCTTACAATTATTACTAATAGCTCAAGTATACATAAATTAATGATT  
TAAATTTAAAAAAGTTCAATTAATTTTTCAATCACCCCAATTAATAATTAAAAAA  
ATTA AAAAATTTTTATACTaAAAAAAAATTA AAAATTTTTAAATATGAAACTCTATAGG  
GTCTTCTCGTCTTTTAAATTAATTTTAGCTTTTTAACTAAAAAATAAATTTTTAATG  
TTTTAAATAGAGACAGAAATTTTTTATCCAACCATTCCATTCCAGCTTCTAATTAAG  
AACTAATGATTATGCTACCTTAGCACGGTCAAATACCGCGGCCATTTAAATCC  
TCAGAGGGCAGGCTA

MEX\_XOT\_3

CAGACCTAATATTTCCAGCTTCTGCACCAAAAATTAATTTTAATCCAACATCGAG  
GTCGCAATCTTTATCTTCGATTAGAACTCTTTGATAATATTACGCTGTTATCCCTA  
AGGTAATTAATCTTACAATTATTACTAATAGCTCAAGTATACATAAATTAATGATT  
TAAATTTAAAAAAGTTCAATTAATTTTTCAATCACCCCAATTAATAATTAAAAA  
ATTAATAATTTTTATACTaAAAAAAATTAATAATTTTTAAATATGAAACTCTATAGG  
GTCTTCTCGTCTTTTAATTAATTTTAGCTTTTTAACTAAAAATAAATTTTTAATG  
TTTTAATAGAGACAGAAATTTTTTATCCAACCATTCCATTCCAGCTTCTAATTAAG  
AACTAATGATTATGCTACCTTAGCACGGTCAAATACCGCGGCCATTTAAATCC  
TCAGAGGGCAGGCTA

MEX\_YOH

CAGACCTAATATCCCCAGCTTCTACACCAAAAATTAATTTTAATCCAACATCGAG  
GTCGCAATCTTTATCTTCGATTAGAACTCTTTGATAATATTACGCTGTTATCCCTA  
AGGTAATTAATCTTACAATTATTACTAATAGCTCAAGTATACATAAATTAATGATT  
TAAATTTAAAAAAGTTCAATTAATTTTTCAATCACCCCAATTAATAATTAAAAA  
ATTAATAATTTTTATACTaAAAAAAATTAATAATTTTTAAATATGAAACTCTATAGG  
GTCTTCTCGTCTTTTAATTAATTTTAGCTTTTTAACTAAAAATAAATTTTTAATG  
TTTTAATAGAGACAGAAATTTTTTATCCAACCATTCCATTCCAGCTTCTAATTAAG  
AACTAATGATTATGCTACCTTAGCACGGTCAAATACCGCGGCCATTTAAATCC  
TCAGAGGGCAGGCTA

noc5

CAGACCTAATATTTCCAGCTTCTGCACCAAAAATTAATTTTAATCCAACATCGAG  
GTCGCAATCTTTATCTTCGATTAGAACTCTTTGATAATATTACGCTGTTATCCCTA  
AGGTAATTAATCTTACAATTATTACTAATAGCTCAAGTATACATAAATTAATGATT  
TAAATTTAAAAAAGTTCAATTAATTTTTCAATCACCCCAATTAATAATTAAAAA  
ATTAATAATTTTTATACTaAAAAAAATTAATAATTTTTAAATATGAAACTCTATAGG  
GTCTTCTCGTCTTTTAATTAATTTTAGCTTTTTAACTAAAAATAAATTTTTAATG  
TTTTAATAGAGACAGAAATTTTTTATCCAACCATTCCATTCCAGCTTCTAATTAAG  
AACTAATGATTATGCTACCTTAGCACGGTCAAATACCGCGGCCATTTAAATCC  
TCAGAGGGCAGGCTA

PE2\_1

CAGACCTAATATCCCCAGCTTCTACACCAAAAATTAATTTTAATCCAACATCGAG  
GTCGCAATCTTTATCTTCGATTAGAACTCTTTGATAATATTACGCTGTTATCCCTA  
AGGTAATTAATCTTACAATTATTACTAATAGCTCAAGTATACATAAATTAATGATT  
TAAATTTAAAAAAGTTCAATTAATTTTTCAATCACCCCAATTAATAATTAAAAA  
ATTAATAATTTTTATACTAAAAAAATTAATAATTTTTAAATATGAAACTCTATAGG  
GTCTTCTCGTCTTTTAATTAATTTTAGCTTTTTAACTAAAAATAAATTTTTAATG  
TTTTAATAGAGACAGAAATTTTTTATCCAACCATTCCATTCCAGCTTCTAATTAAG  
AACTAATGATTATGCTACCTTAGCACGGTCAAATACCGCGGCCATTTAAATCC  
TCAGAGGGCAGGCTA

PE2\_3

CAGACCTAATATCCCCAGCTTCTACACCAAAAATTAATTTTAATCCAACATCGAG  
GTCGCAATCTTTATCTTCGATTAGAACTCTTTGATAATATTACGCTGTTATCCCTA  
AGGTAATTAATCTTACAATTATTACTAATAGCTCAAGTATACATAAATTAATGATT  
TAAATTTAAAAAAGTTCAATTAATTTTTCAATCACCCCAATTAATAATTAAAAA  
ATTAATAATTTTTATACTAAAAAAATTAATAATTTTTAAATATGAAACTCTATAGG  
GTCTTCTCGTCTTTTAATTAATTTTAGCTTTTTAACTAAAAATAAATTTTTAATG  
TTTTAATAGAGACAGAAATTTTTTATCCAACCATTCCATTCCAGCTTCTAATTAAG  
AACTAATGATTATGCTACCTTAGCACGGTCAAATACCGCGGCCATTTAAATCC  
TCAGAGGGCAGGCTA

PE2\_4

CAGACCTAATATCCCCAGCTTCTACACCAAAAATTAATTTTAATCCAACATCGAG  
GTCGCAATCTTTATCTTCGATTAGAACTCTTTGATAATATTACGCTGTTATCCCTA  
AGGTAATTAATCTTACAATTATTACTAATAGCTCAAGTATACATAAATTAATGATT  
TAAATTTAAAAAAGTTCAATTAATTTTTCAATCACCCCAATTAATAATTAAAAA  
ATTAATAATTTTTATACTAAAAAAAATTAATAATTTTTAAATATGAAACTCTATAGG  
GTCTTCTCGTCTTTTAAATTAATTTTAGCTTTTTAACTAAAAAATAAATTTTTAATG  
TTTTAATAGAGACAGAAATTTTTTATCCAACCATTCCAGCTTCTAATTAAG  
AACTAATGATTATGCTACCTTAGCACGGTCAAATACCGCGGCCATTTAAATCC  
TCAGAGGGCAGGCTA

PE2\_5

CAGACCTAATATCCCCAGCTTCTACACCAAAAATTAATTTTAATCCAACATCGAG  
GTCGCAATCTTTATCTTCGATTAGAACTCTTTGATAATATTACGCTGTTATCCCTA  
AGGTAATTAATCTTACAATTATTACTAATAGCTCAAGTATACATAAATTAATGATT  
TAAATTTAAAAAAGTTCAATTAATTTTTCAATCACCCCAATTAATAATTAAAAA  
ATTAATAATTTTTATACTAAAAAAAATTAATAATTTTTAAATATGAAACTCTATAGG  
GTCTTCTCGTCTTTTAAATTAATTTTAGCTTTTTAACTAAAAAATAAATTTTTAATG  
TTTTAATAGAGACAGAAATTTTTTATCCAACCATTCCAGCTTCTAATTAAG  
AACTAATGATTATGCTACCTTAGCACGGTCAAATACCGCGGCCATTTAAATCC  
TCAGAGGGCAGGCTA

PE2\_6

CAGACCTAATATCCCCAGCTTCTACACCAAAAATTAATTTTAATCCAACATCGAG  
GTCGCAATCTTTATCTTCGATTAGAACTCTTTGATAATATTACGCTGTTATCCCTA  
AGGTAATTAATCTTACAATTATTACTAATAGCTCAAGTATACATAAATTAATGATT  
TAAATTTAAAAAAGTTCAATTAATTTTTCAATCACCCCAATTAATAATTAAAAA  
ATTAATAATTTTTATACTAAAAAAAATTAATAATTTTTAAATATGAAACTCTATAGG  
GTCTTCTCGTCTTTTAAATTAATTTTAGCTTTTTAACTAAAAAATAAATTTTTAATG  
TTTTAATAGAGACAGAAATTTTTTATCCAACCATTCCAGCTTCTAATTAAG  
AACTAATGATTATGCTACCTTAGCACGGTCAAATACCGCGGCCATTTAAATCC  
TCAGAGGGCAGGCTA

PE2\_7

CAGACCTAATATCCCCAGCTTCTACACCAAAAATTAATTTTAATCCAACATCGAG  
GTCGCAATCTTTATCTTCGATTAGAACTCTTTGATAATATTACGCTGTTATCCCTA  
AGGTAATTAATCTTACAATTATTACTAATAGCTCAAGTATACATAAATTAATGATT  
TAAATTTAAAAAAGTTCAATTAATTTTTCAATCACCCCAATTAATAATTAAAAA  
ATTAATAATTTTTATACTAAAAAAAATTAATAATTTTTAAATATGAAACTCTATAGG  
GTCTTCTCGTCTTTTAAATTAATTTTAGCTTTTTAACTAAAAAATAAATTTTTAATG  
TTTTAATAGAGACAGAAATTTTTTATCCAACCATTCCAGCTTCTAATTAAG  
AACTAATGATTATGCTACCTTAGCACGGTCAAATACCGCGGCCATTTAAATCC  
TCAGAGGGCAGGCTA

PE\_MAN\_12

CAGACCTAATATCCCCAGCTTCTACACCAAAAATTAATTTTAATCCAACATCGAG  
GTCGCAATCTTTATCTTCGATTAGAACTCTTTGATAATATTACGCTGTTATCCCTA  
AGGTAATTAATCTTACAATTATTACTAATAGCTCAAGTATACATAAATTAATGATT  
TAAATTTAAAAAAGTTCAATTAATTTTTCAATCACCCCAATTAATAATTAAAAA  
ATTAATAATTTTTATACTaAAAAAAAATTAATAATTTTTAAATATGAAACTCTATAGG  
GTCTTCTCGTCTTTTAAATTAATTTTAGCTTTTTAACTAAAAAATAAATTTTTAATG  
TTTTAATAGAGACAGAAATTTTTTATCCAACCATTCCAGCTTCTAATTAAG  
AACTAATGATTATGCTACCTTAGCACGGTCAAATACCGCGGCCATTTAAATCC  
TCAGAGGGCAGGCTA

PE\_MAN\_13

CAGACCTAATATCCCCAGCTTCTACACCAAAAATTAATTTTAATCCAACATCGAG  
GTCGCAATCTTTATCTTCGATTAGAACTCTTTGATAATATTACGCTGTTATCCCTA  
AGGTAATTAATCTTACAATTATTACTAATAGCTCAAGTATACATAAATTAATGATT  
TAAATTTAAAAAAGTTCAATTAATTTTTCAATCACCCCAATTAATAATTAAAAAA  
ATTA AAAATTTTTATACTaAAAAAAAATTA AAAATTTTTAAATATGAAACTCTATAGG  
GTCTTCTCGTCTTTTAATTAATTTTAGCTTTTTAACTAAAAATAAATTTTTAATG  
TTTAAATAGAGACAGAAATTTTTTATCCAACCATTCCAGCTTCTAATTAAG  
AACTAATGATTATGCTACCTTAGCACGGTCAAATACCGCGGCCATTTAAATCC  
TCAGAGGGCAGGCTA

PE\_MAN\_15

CAGACCTAATATCCCCAGCTTCTACACCAAAAATTAATTTTAATCCAACATCGAG  
GTCGCAATCTTTATCTTCGATTAGAACTCTTTGATAATATTACGCTGTTATCCCTA  
AGGTAATTAATCTTACAATTATTACTAATAGCTCAAGTATACATAAATTAATGATT  
TAAATTTAAAAAAGTTCAATTAATTTTTCAATCACCCCAATTAATAATTAAAAAA  
ATTA AAAATTTTTATACTaAAAAAAAATTA AAAATTTTTAAATATGAAACTCTATAGG  
GTCTTCTCGTCTTTTAATTAATTTTAGCTTTTTAACTAAAAATAAATTTTTAATG  
TTTAAATAGAGACAGAAATTTTTTATCCAACCATTCCAGCTTCTAATTAAG  
AACTAATGATTATGCTACCTTAGCACGGTCAAATACCGCGGCCATTTAAATCC  
TCAGAGGGCAGGCTA

PE\_MAN\_16

CAGACCTAATATCCCCAGCTTCTACACCAAAAATTAATTTTAATCCAACATCGAG  
GTCGCAATCTTTATCTTCGATTAGAACTCTTTGATAATATTACGCTGTTATCCCTA  
AGGTAATTAATCTTACAATTATTACTAATAGCTCAAGTATACATAAATTAATGATT  
TAAATTTAAAAAAGTTCAATTAATTTTTCAATCACCCCAATTAATAATTAAAAAA  
ATTA AAAATTTTTATACTaAAAAAAAATTA AAAATTTTTAAATATGAAACTCTATAGG  
GTCTTCTCGTCTTTTAATTAATTTTAGCTTTTTAACTAAAAATAAATTTTTAATG  
TTTAAATAGAGACAGAAATTTTTTATCCAACCATTCCAGCTTCTAATTAAG  
AACTAATGATTATGCTACCTTAGCACGGTCAAATACCGCGGCCATTTAAATCC  
TCAGAGGGCAGGCTA

PE\_MAN\_19

CAGACCTAATATCCCCAGCTTCTACACCAAAAATTAATTTTAATCCAACATCGAG  
GTCGCAATCTTTATCTTCGATTAGAACTCTTTGATAATATTACGCTGTTATCCCTA  
AGGTAATTAATCTTACAATTATTACTAATAGCTCAAGTATACATAAATTAATGATT  
TAAATTTAAAAAAGTTCAATTAATTTTTCAATCACCCCAATTAATAATTAAAAAA  
ATTA AAAATTTTTATACTaAAAAAAAATTA AAAATTTTTAAATATGAAACTCTATAGG  
GTCTTCTCGTCTTTTAATTAATTTTAGCTTTTTAACTAAAAATAAATTTTTAATG  
TTTAAATAGAGACAGAAATTTTTTATCCAACCATTCCAGCTTCTAATTAAG  
AACTAATGATTATGCTACCTTAGCACGGTCAAATACCGCGGCCATTTAAATCC  
TCAGAGGGCAGGCTA

PE\_MAN\_2

CAGACCTAATATCCCCAGCTTCTACACCAAAAATTAATTTTAATCCAACATCGAG  
GTCGCAATCTTTATCTTCGATTAGAACTCTTTGATAATATTACGCTGTTATCCCTA  
AGGTAATTAATCTTACAATTATTACTAATAGCTCAAGTATACATAAATTAATGATT  
TAAATTTAAAAAAGTTCAATTAATTTTTCAATCACCCCAATTAATAATTAAAAAA  
ATTA AAAATTTTTATACTaAAAAAAAATTA AAAATTTTTAAATATGAAACTCTATAGG  
GTCTTCTCGTCTTTTAATTAATTTTAGCTTTTTAACTAAAAATAAATTTTTAATG  
TTTAAATAGAGACAGAAATTTTTTATCCAACCATTCCAGCTTCTAATTAAG  
AACTAATGATTATGCTACCTTAGCACGGTCAAATACCGCGGCCATTTAAATCC  
TCAGAGGGCAGGCTA

PE\_MAN\_23

CAGACCTAATATCCCCAGCTTCTACACCAAAAATTAATTTTAATCCAACATCGAG  
GTCGCAATCTTTATCTTCGATTAGAACTCTTTGATAATATTACGCTGTTATCCCTA  
AGGTAATTAATCTTACAATTATTACTAATAGCTCAAGTATACATAAATTAATGATT  
TAAATTTAAAAAAGTTCAATTAATTTTTCAATCACCCCAATTAATAATTAAAAAA  
ATTA AAAATTTTTATACTaAAAAAAAATTA AAAATTTTTAAATATGAAACTCTATAGG  
GTCTTCTCGTCTTTTAAATTAATTTTAGCTTTTTAACTAAAAAATAAATTTTTAATG  
TTTTAAATAGAGACAGAAATTTTTTATCCAACCATTCCAGCTTCTAATTAAG  
AACTAATGATTATGCTACCTTAGCACGGTCAAATACCGCGGCCATTTAAATCC  
TCAGAGGGCAGGCTA

PE\_MAN\_29

CAGACCTAATATCCCCAGCTTCTACACCAAAAATTAATTTTAATCCAACATCGAG  
GTCGCAATCTTTATCTTCGATTAGAACTCTTTGATAATATTACGCTGTTATCCCTA  
AGGTAATTAATCTTACAATTATTACTAATAGCTCAAGTATACATAAATTAATGATT  
TAAATTTAAAAAAGTTCAATTAATTTTTCAATCACCCCAATTAATAATTAAAAAA  
ATTA AAAATTTTTATACTaAAAAAAAATTA AAAATTTTTAAATATGAAACTCTATAGG  
GTCTTCTCGTCTTTTAAATTAATTTTAGCTTTTTAACTAAAAAATAAATTTTTAATG  
TTTTAAATAGAGACAGAAATTTTTTATCCAACCATTCCAGCTTCTAATTAAG  
AACTAATGATTATGCTACCTTAGCACGGTCAAATACCGCGGCCATTTAAATCC  
TCAGAGGGCAGGCTA

PE\_MAN\_6

CAGACCTAATATCCCCAGCTTCTACACCAAAAATTAATTTTAATCCAACATCGAG  
GTCGCAATCTTTATCTTCGATTAGAACTCTTTGATAATATTACGCTGTTATCCCTA  
AGGTAATTAATCTTACAATTATTACTAATAGCTCAAGTATACATAAATTAATGATT  
TAAATTTAAAAAAGTTCAATTAATTTTTCAATCACCCCAATTAATAATTAAAAAA  
ATTA AAAATTTTTATACTaAAAAAAAATTA AAAATTTTTAAATATGAAACTCTATAGG  
GTCTTCTCGTCTTTTAAATTAATTTTAGCTTTTTAACTAAAAAATAAATTTTTAATG  
TTTTAAATAGAGACAGAAATTTTTTATCCAACCATTCCAGCTTCTAATTAAG  
AACTAATGATTATGCTACCTTAGCACGGTCAAATACCGCGGCCATTTAAATCC  
TCAGAGGGCAGGCTA

PE\_MAN\_8

CAGACCTAATATCCCCAGCTTCTACACCAAAAATTAATTTTAATCCAACATCGAG  
GTCGCAATCTTTATCTTCGATTAGAACTCTTTGATAATATTACGCTGTTATCCCTA  
AGGTAATTAATCTTACAATTATTACTAATAGCTCAAGTATACATAAATTAATGATT  
TAAATTTAAAAAAGTTCAATTAATTTTTCAATCACCCCAATTAATAATTAAAAAA  
ATTA AAAATTTTTATACTaAAAAAAAATTA AAAATTTTTAAATATGAAACTCTATAGG  
GTCTTCTCGTCTTTTAAATTAATTTTAGCTTTTTAACTAAAAAATAAATTTTTAATG  
TTTTAAATAGAGACAGAAATTTTTTATCCAACCATTCCAGCTTCTAATTAAG  
AACTAATGATTATGCTACCTTAGCACGGTCAAATACCGCGGCCATTTAAATCC  
TCAGAGGGCAGGCTA

pit1

CAGACCTAATATTTCCAGCTTCTGCACCAAAAATTAATTTTAATCCAACATCGAG  
GTCGCAATCTTTATCTTCGATTAGAACTCTTTGATAATATTACGCTGTTATCCCTA  
AGGTAATTAATCTTACAATTATTACTAATAGCTCAAGTATACATAAATTAATGATT  
TAAATTTAAAAAAGTTGATTAATTTTTCAATCACCCCAATTAATAATTAAAAAA  
ATTA AAAATTTTTATACTaAAAAAAAATTA AAAATTTTTAAATATGAAACTCTATAGG  
GTCTTCTCGTCTTTTAAATTAATCTTAGCTTTTTAACTAAAAAATAAATTTTTAATG  
TTTTAAATAGAGACAGAAATTTTTTATCCAACCATTCCAGCTTCTAATTAAG  
AACTAATGATTATGCTACCTTAGCACGGTCAAATACCGCGGCCATTTAAATCC  
TCAGAGGGCAGGCTA

pit2

CAGACCTAATATTTCCAGCTTCTGCACCAAAAATTAATTTTAATCCAACATCGAG  
GTCGCAATCTTTATCTTCGATTAGAACTCTTTGATAATATTACGCTGTTATCCCTA  
AGGTAATTAATCTTACAATTATTACTAATAGCTCAAGTATACATAAATTAATGATT  
TAAATTTAAAAAAGTTTCGATTAATTTTTCAATCACCCCAATTAATAATTAAAAA  
ATTAATAATTTTTATACTaAAAAAAATTAATAATTTTTAAATATGAAACTCTATAGG  
GTCTTCTCGTCTTTTAAATTAATCTTAGCTTTTTAACTAAAAAATAAATTTTTAATG  
TTTTAAATAGAGACAGAAATTTTTTATCCAACCATTTCATTCCAGCTTCTAATTAAG  
AAACTAATGATTATGCTACCTTAGCACGGTCAAATACCGCGGCCATTTAAATCC  
TCAGAGGGCAGGCTA

pit4

CAGACCTAATATTTCCAGCTTCTGCACCAAAAATTAATTTTAATCCAACATCGAG  
GTCGCAATCTTTATCTTCGATTAGAACTCTTTGATAATATTACGCTGTTATCCCTA  
AGGTAATTAATCTTACAATTATTACTAATAGCTCAAGTATACATAAATTAATGATT  
TAAATTTAAAAAAGTTTCGATTAATTTTTCAATCACCCCAATTAATAATTAAAAA  
ATTAATAATTTTTATACTaAAAAAAATTAATAATTTTTAAATATGAAACTCTATAGG  
GTCTTCTCGTCTTTTAAATTAATCTTAGCTTTTTAACTAAAAAATAAATTTTTAATG  
TTTTAAATAGAGACAGAAATTTTTTATCCAACCATTTCATTCCAGCTTCTAATTAAG  
AAACTAATGATTATGCTACCTTAGCACGGTCAAATACCGCGGCCATTTAAATCC  
TCAGAGGGCAGGCTA

ron3

CAGACCTAATATTTCCAGCTTCTGCACCAAAAATTAATTTTAATCCAACATCGAG  
GTCGCAATCTTTATCTTCGATTAGAACTCTTTGATAATATTACGCTGTTATCCCTA  
AGGTAATTAATCTTACAATTATTACTAATAGCTCAAGTATACATAAATTAATGATT  
TAAATTTAAAAAAGTTCAATTAATTTTTCAATCACCCCAATTAATAATTAAAAA  
ATTAATAATTTTTATACTaAAAAAAATTAATAATTTTTAAATATGAAACTCTATAGG  
GTCTTCTCGTCTTTTAAATTAATTTTAGCTTTTTAACTAAAAAATAAATTTTTAATG  
TTTTAAATAGAGACAGAAATTTTTTATCCAACCATTTCATTCCAGCTTCTAATTAAG  
AAACTAATGATTATGCTACCTTAGCACGGTCAAATACCGCGGCCATTTAAATCC  
TCAGAGGGCAGGCTA

sob1

CAGACCTAATATTTCCAGCTTCTGCACCAAAAATTAATTTTAATCCAACATCGAG  
GTCGCAATCTTTATCTTCGATTAGAACTCTTTGATAATATTACGCTGTTATCCCTA  
AGGTAATTAATCTTACAATTATTACTAATAGCTCAAGTATACATAAATTAATGATT  
TAAATTTAAAAAAGTTTCGATTAATTTTTCAATCACCCCAATTAATAATTAAAAA  
ATTAATAATTTTTATACTaAAAAAAATTAATAATTTTTAAATATGAAACTCTATAGG  
GTCTTCTCGTCTTTTAAATTAATCTTAGCTTTTTAACTAAAAAATAAATTTTTAATG  
TTTTAAATAGAGACAGAAATTTTTTATCCAACCATTTCATTCCAGCTTCTAATTAAG  
AAACTAATGATTATGCTACCTTAGCACGGTCAAATACCGCGGCCATTTAAATCC  
TCAGAGGGCAGGCTA

SPA\_PRA\_1

CAGACCTAATATTTCCAGCTTCTGCACCAAAAATTAATTTTAATCCAACATCGAG  
GTCGCAATCTTTATCTTCGATTAGAACTCTTTGATAATATTACGCTGTTATCCCTA  
AGGTAATTAATCTTACAATTATTACTAATAGCTCAAGTATACATAAATTAATGATT  
TAAATTTAAAAAAGTTCAATTAATTTTTCAATCACCCCAATTAATAATTAAAAA  
ATTAATAATTTTTATACTaAAAAAAATTAATAATTTTTAAATATGAAACTCTATAGG  
GTCTTCTCGTCTTTTAAATTAATTTTAGCTTTTTAACTAAAAAATAAATTTTTAATG  
TTTTAAATAGAGACAGAAATTTTTTATCCAACCATTTCATTCCAGCTTCTAATTAAG  
AAACTAATGATTATGCTACCTTAGCACGGTCAAATACCGCGGCCATTTAAATCC  
TCAGAGGGCAGGCTA

SWI\_NEU\_1

CAGACCTAATATTTCCAGCTTCTGCACCAAAAATTAATTTTAATCCAACATCGAG  
GTCGCAATCTTTATCTTCGATTAGAACTCTTTGATAATATTACGCTGTTATCCCTA  
AGGTAATTAATCTTACAATTATTACTAATAGCTCAAGTATACATAAATTAATGATT  
TAAATTTAAAAAAGTTTCGATTAATTTTTCAATCACCCCAATTAATAATTAAAAA  
ATTAATAATTTTTATACTaAAAAAAATTAATAATTTTTAAATATGAAACTCTATAGG  
GTCTTCTCGTCTTTTAAATTAATCTTAGCTTTTTAACTAAAAAATAAATTTTTAATG  
TTTTAAATAGAGACAGAAATTTTTTATCCAACCATTCCATTCCAGCTTCTAATTAAG  
AACTAATGATTATGCTACCTTAGCACGGTCAAATACCGCGGCCATTTAAATCC  
TCAGAGGGCAGGCTA

tol1

CAGACCTAATATTTCCAGCTTCTGCACCAAAAATTAATTTTAATCCAACATCGAG  
GTCGCAATCTTTATCTTCGATTAGAACTCTTTGATAATATTACGCTGTTATCCCTA  
AGGTAATTAATCTTACAATTATTACTAATAGCTCAAGTATACATAAATTAATGATT  
TAAATTTAAAAAAGTTCAATTAATTTTTCAATCACCCCAATTAATAATTAAAAA  
ATTAATAATTTTTATACTaAAAAAAATTAATAATTTTTAAATATGAAACTCTATAGG  
GTCTTCTCGTCTTTTAAATTAATTTTAGCTTTTTAACTAAAAAATAAATTTTTAATG  
TTTTAAATAGAGACAGAAATTTTTTATCCAACCATTCCATTCCAGCTTCTAATTAAG  
AACTAATGATTATGCTACCTTAGCACGGTCAAATACCGCGGCCATTTAAATCC  
TCAGAGGGCAGGCTA

;

endblock;

### datasetS3

#NEXUS

```
begin data;  
  dimensions ntax=191 nchar=736;  
  format datatype=dna gap=- interleave=no;  
  matrix
```

AFR10

```
ATTATTAGACAAGAAAGGGGGGAAAAAAGAAGCTTTTGGAACCTTAGGAATAATTT  
ATGCCATGATAGCTATCGGATTATTAGGATTCGTAGTTTGAGCTCACCATATATT  
TACAGTAGGGATAGATGTAGATACCCGAGCTTACTTCACTTCAGCAACTATAATT  
ATTGCGGTTCCAACCTGGGATTAAGTCTTTAGATGACTAGCCACCTTTCATGGAA  
CTCAAATTTTAAATAGACCAGTAACCCTGTGAGCTTTAGGTTTTGTATTTTTATTT  
ACAGTAGGAGGATTAACAGGGGTAATTTTAGCTAATTCTTCAATTGATATTATTCT  
TCACGATACTTACTATGTAGTAGCTCATTTTCACTATGTTCTTTCTATAGGAGCTG  
TATTTGCAATTATAGCCGGAATTGTCCAATGATTCCCATTATTTACCGGACTAAC  
CTTAAATAATTTTTTTTTTAAAAACCCAATTTATTACTATATTTTTAGGTGTAAATTTA  
ACATTTTTTCCCAACACTTTTTAGGGCTAAGAGGAATGCCTCGGCGATATTCGG  
ATTATCCAGATGCTTTCCTACTATCTGAAATGCCATTTTCACTATTGGTTCCATTATT  
TCTCTACAAGAATTATCTTTTTTTTTATTTATCTTATGAGAAAGGCTTTCTTCCCAA  
CGTAAATCTTTGAGAACTTTAAATGTAACAACCTTCAATTGAATGGTTACAAGCCCT  
ACCCCTAGTG
```

AFR11

```
ATTATTAGACAAGAAAGGGGGGAAAAAAGAAGCTTTTGGAACCTTAGGAATAATTT  
ATGCCATGATAGCTATCGGATTATTAGGATTCGTAGTTTGAGCTCACCATATATT  
TACAGTAGGGATAGATGTAGATACCCGAGCTTACTTCACTTCAGCAACTATAATT  
ATTGCGGTTCCAACCTGGGATTAAGTCTTTAGATGACTAGCCACCTTTCATGGAA  
CTCAAATTTTAAATAGACCAGTAACCCTGTGAGCTTTAGGTTTTGTATTTTTATTT  
ACAGTAGGAGGATTAACAGGGGTAATTTTAGCTAATTCTTCAATTGATATTATTCT  
TCACGATACTTACTATGTAGTAGCTCATTTTCACTATGTTCTTTCTATAGGAGCTG  
TATTTGCAATTATAGCCGGAATTGTCCAATGATTCCCATTATTTACCGGACTAAC  
CTTAAATAATTTTTTTTTTAAAAACCCAATTTATTACTATATTTTTAGGTGTAAATTTA  
ACATTTTTTCCCAACACTTTTTAGGGCTAAGAGGAATGCCTCGGCGATATTCGG  
ATTATCCAGATGCTTTCCTACTATCTGAAATGCCATTTTCACTATTGGTTCCATTATT  
TCTCTACAAGAATTATCTTTTTTTTTATTTATCTTATGAGAAAGGCTTTCTTCCCAA  
CGTAAATCTTTGAGAACTTTAAATGTAACAACCTTCAATTGAATGGTTACAAGCCCT  
ACCCCTAGTG
```

AFR12

```
ATTATTAGACAAGAAAGGGGGGAAAAAAGAAGCTTTTGGAACCTTAGGAATAATTT  
ATGCCATGATAGCTATCGGATTATTAGGATTCGTAGTTTGAGCTCACCATATATT  
TACAGTAGGGATAGATGTAGATACCCGAGCTTACTTCACTTCAGCAACTATAATT  
ATTGCGGTTCCAACCTGGGATTAAGTCTTTAGATGACTAGCCACCTTTCATGGAA  
CTCAAATTTTAAATAGACCAGTAACCCTGTGAGCTTTAGGTTTTGTATTTTTATTT  
ACAGTAGGAGGATTAACAGGGGTAATTTTAGCTAATTCTTCAATTGATATTATTCT  
TCACGATACTTACTATGTAGTAGCTCATTTTCACTATGTTCTTTCTATAGGAGCTG  
TATTTGCAATTATAGCCGGAATTGTCCAATGATTCCCATTATTTACCGGACTAAC  
CTTAAATAATTTTTTTTTTAAAAACCCAATTTATTACTATATTTTTAGGTGTAAATTTA  
ACATTTTTTCCCAACACTTTTTAGGGCTAAGAGGAATGCCTCGGCGATATTCGG  
ATTATCCAGATGCTTTCCTACTATCTGAAATGCCATTTTCACTATTGGTTCCATTATT
```



TCTCTCACAGAATTATCTTTTTTTTATTTATCTTATGAGAAAGGCTTTCTTCCCAA  
CGTAAATCTTTGAGAACTTTAAATGTAACAACCTTCAATTGAATGGTTACAAGCCCT  
ACCCCCTAGTG

AFR18

ATTATTAGACAAGAAAGGGGGGAAAAAAGAAGCTTTTGGAACCTTAGGAATAATTT  
ATGCCATGATAGCTATCGGATTATTAGGATTCGTAGTTTGAGCTCACCATATATT  
TACAGTAGGGATAGATGTAGATACCCGAGCTTACTTCACTTCAGCAACTATAATT  
ATTGCGGTTCCAACCTGGGATTAAGTCTTTAGATGACTAGCCACCTTTTCATGGAA  
CTCAAATTTTAAATAGACCAGTAACCCTGTGAGCTTTAGGTTTTGTATTTTTATTT  
ACAGTAGGAGGATTAACAGGGGTAATTTTAGCTAATTCTTCAATTGATATTATTCT  
TCACGATACTTACTATGTAGTAGCTCATTTTCACTATGTTCTTTCTATAGGAGCTG  
TATTTGCAATTATAGCCGGAATTGTCCAATGATTCCCATTATTTACCGGACTAAC  
CTTAAATAATTTTTTTTTTAAAAACCCAATTTATTACTATATTTTTAGGTGTAAATTTA  
ACATTTTTTCCCAACACTTTTTAGGGCTAAGAGGAATGCCTCGGCGATATTCGG  
ATTATCCAGATGCTTTCCTACTATCTGAAATGCCATTTTCATCTATTGGTTCCATTATT  
TCTCTCACAGAATTATCTTTTTTTTATTTATCTTATGAGAAAGGCTTTCTTCCCAA  
CGTAAATCTTTGAGAACTTTAAATGTAACAACCTTCAATTGAATGGTTACAAGCCCT  
ACCCCCTAGTG

afr19

ATTATTAGACAAGAAAGGGGGGAAAAAAGAAGCTTTTGGAACCTTAGGAATAATTT  
ATGCCATGATAGCTATCGGATTATTAGGATTCGTAGTTTGAGCTCACCATATATT  
TACAGTAGGGATAGATGTAGATACCCGAGCTTACTTCACTTCAGCAACTATAATT  
ATTGCGGTTCCAACCTGGGATTAAGTCTTTAGATGACTAGCCACCTTTTCATGGAA  
CTCAAATTTTAAATAGACCAGTAACCCTGTGAGCTTTAGGTTTTGTATTTTTATTT  
ACAGTAGGAGGATTAACAGGGGTAATTTTAGCTAATTCTTCAATTGATATTATTCT  
TCACGATACTTACTATGTAGTAGCTCATTTTCACTATGTTCTTTCTATAGGAGCTG  
TATTTGCAATTATAGCCGGAATTGTCCAATGATTCCCATTATTTACCGGACTAAC  
CTTAAATAATTTTTTTTTTAAAAACCCAATTTATTACTATATTTTTAGGTGTAAATTTA  
ACATTTTTTCCCAACACTTTTTAGGGCTAAGAGGAATGCCTCGGCGATATTCGG  
ATTATCCAGATGCTTTCCTACTATCTGAAATGCCATTTTCATCTATTGGTTCCATTATT  
TCTCTCACAGAATTATCTTTTTTTTATTTATCTTATGAGAAAGGCTTTCTTCCCAA  
CGTAAATCTTTGAGAACTTTAAATGTAACAACCTTCAATTGAATGGTTACAAGCCCT  
ACCCCCTAGTG

AFR2

ATTATTAGACAAGAAAGGGGGGAAAAAAGAAGCTTTTGGAACCTTAGGAATAATTT  
ATGCCATGATAGCTATCGGATTATTAGGATTCGTAGTTTGAGCTCACCATATATT  
TACAGTAGGGATAGATGTAGATACCCGAGCTTACTTCACTTCAGCAACTATAATT  
ATTGCGGTTCCAACCTGGGATTAAGTCTTTAGATGACTAGCCACCTTTTCATGGAA  
CTCAAATTTTAAATAGACCAGTAACCCTGTGAGCTTTAGGTTTTGTATTTTTATTT  
ACAGTAGGAGGATTAACAGGGGTAATTTTAGCTAATTCTTCAATTGATATTATTCT  
TCACGATACTTACTATGTAGTAGCTCATTTTCACTATGTTCTTTCTATAGGAGCTG  
TATTTGCAATTATAGCCGGAATTGTCCAATGATTCCCATTATTTACCGGACTAAC  
CTTAAATAATTTTTTTTTTAAAAACCCAATTTATTACTATATTTTTAGGTGTAAATTTA  
ACATTTTTTCCCAACACTTTTTAGGGCTAAGAGGAATGCCTCGGCGATATTCGG  
ATTATCCAGATGCTTTCCTACTATCTGAAATGCCATTTTCATCTATTGGTTCCATTATT  
TCTCTCACAGAATTATCTTTTTTTTATTTATCTTATGAGAAAGGCTTTCTTCCCAA  
CGTAAATCTTTGAGAACTTTAAATGTAACAACCTTCAATTGAATGGTTACAAGCCCT  
ACCCCCTAGTG

AFR3

ATTATTAGACAAGAAAGGGGGGAAAAAAGAAGCTTTTGGAACCTTAGGAATAATTT

ATGCCATGATAGCTATCGGATTATTAGGATTCGTAGTTTGAGCTCACCATATATT  
TACAGTAGGGATAGATGTAGATACCCGAGCTTACTTCACTTCAGCAACTATAATT  
ATTGCGGTTCCAACCTGGGATTAAGTCTTTAGATGACTAGCCACCTTTCATGGAA  
CTCAAATTTTAAATAGACCAGTAACCCTGTGAGCTTTAGGTTTTGTATTTTTATTT  
ACAGTAGGAGGATTAACAGGGGTAATTTTAGCTAATTCTTCAATTGATATTATTCT  
TCACGATACTTACTATGTAGTAGCTCATTTCCTATGTTCTTTCTATAGGAGCTG  
TATTTGCAATTATAGCCGGAATTGTCCAATGATTCCCATTATTTACCGGACTAAC  
CTTAAATAATTTTTTTTTTAAAAACCCAATTTATTACTATATTTTTTAGGTGTAAATTTA  
ACATTTTTTCCCAACACTTTTTAGGGCTAAGAGGAATGCCTCGGCGATATTCGG  
ATTATCCAGATGCTTTCCTATCTGAAATGCCATTTTCATCTATTGGTTCCATTATT  
TCTCTCACAAGAATTATCTTTTTTTTTATTTATCTTATGAGAAAGGCTTTCTTCCCAA  
CGTAAATCTTTGAGAACTTTAAATGTAACAACCTTCAATTGAATGGTTACAAGCCCT  
ACCCCTAGTG

AFR5

ATTATTAGACAAGAAAGGGGGGAAAAAAGAAGCTTTTGGAACCTTAGGAATAATTT  
ATGCCATGATAGCTATCGGATTATTAGGATTCGTAGTTTGAGCTCACCATATATT  
TACAGTAGGGATAGATGTAGATACCCGAGCTTACTTCACTTCAGCAACTATAATT  
ATTGCGGTTCCAACCTGGGATTAAGTCTTTAGATGACTAGCCACCTTTCATGGAA  
CTCAAATTTTAAATAGACCAGTAACCCTGTGAGCTTTAGGTTTTGTATTTTTATTT  
ACAGTAGGAGGATTAACAGGGGTAATTTTAGCTAATTCTTCAATTGATATTATTCT  
TCACGATACTTACTATGTAGTAGCTCATTTCCTATGTTCTTTCTATAGGAGCTG  
TATTTGCAATTATAGCCGGAATTGTCCAATGATTCCCATTATTTACCGGACTAAC  
CTTAAATAATTTTTTTTTTAAAAACCCAATTTATTACTATATTTTTTAGGTGTAAATTTA  
ACATTTTTTCCCAACACTTTTTAGGGCTAAGAGGAATGCCTCGGCGATATTCGG  
ATTATCCAGATGCTTTCCTATCTGAAATGCCATTTTCATCTATTGGTTCCATTATT  
TCTCTCACAAGAATTATCTTTTTTTTTATTTATCTTATGAGAAAGGCTTTCTTCCCAA  
CGTAAATCTTTGAGAACTTTAAATGTAACAACCTTCAATTGAATGGTTACAAGCCCT  
ACCCCTAGTG

afr9

ATTATTAGACAAGAAAGGGGGGAAAAAAGAAGCTTTTGGAACCTTAGGAATAATTT  
ATGCCATGATAGCTATCGGATTATTAGGATTCGTAGTTTGAGCTCACCATATATT  
TACAGTAGGGATAGATGTAGATACCCGAGCTTACTTCACTTCAGCAACTATAATT  
ATCGCGGTTCCAACCTGGGATTAAGTCTTTAGGTGACTAGCCACCTTTCATGGA  
ACTCAAATTTTAAATAGACCAGTAACCCTGTGAGCTTTAGGTTTTGTATTTTTATT  
TACAGTAGGAGGATTAACAGGGGTAATTTTAGCTAATTCTTCAATTGATATTATTC  
TTCACGATACTTACTATGTAGTAGCTCATTTCCTATGTTCTTTCTATAGGAGCT  
GTATTTGCAATTATAGCCGGAATTGTCCAATGATTCCCATTATTTACTGGACTAA  
CCTTAAATAATTTTTTTTTTAAAAACCCAATTTATTACTATATTTTTTAGGTGTAAATTT  
AACATTTTTTCTCAACACTTTTTAGGGCTAAGAGGAATGCCTCGGCGATATTCG  
GATTATCCAGATGCTTTCCTATCTGAAATGCCATTTTCATCTATTGGTTCCATTAT  
TTCTCTCACAAGAATTATCTTTTTTTTTATTTATCTTATGAGAAAGGCTTTCTTCCCAA  
ACGTAATCTTTGAGAACTTTAAATGTAACAACCTTCAATTGAATGGTTACAAGCC  
CTACCCCTAGTG

AQU10

ATTATTAGACAAGAAAGGGGGGAAAAAAGAAGCTTTTGGAACCTTAGGAATAATTT  
ATGCCATGATAGCTATCGGATTATTAGGATTCGTAGTTTGAGCTCACCATATATT  
TACAGTAGGGATAGATGTAGATACCCGAGCTTACTTCACTTCAGCAACTATAATT  
ATTGCGGTTCCAACCTGGGATTAAGTCTTTAGATGACTAGCCACCTTTCATGGAA  
CTCAAATTTTAAATAGACCAGTAACCCTGTGAGCTTTAGGTTTTGTATTTTTATTT  
ACAGTAGGAGGATTAACAGGGGTAATTTTAGCTAATTCTTCAATTGATATTATTCT

TCACGATACTTACTATGTAGTAGCTCATTTCCTACTATGTTCTTTCTATAGGAGCTG  
TATTTGCAATTATAGCCGGAATTGTCCAATGATTCCCATTATTTACCGGACTAAC  
CTTAAATAATTTTTTTTTAAAAACCCAATTTACTATATTTTTAGGTGTAAATTTA  
ACATTTTTTCCCAACACTTTTTAGGGCTAAGAGGAATGCCTCGGCGATATTCGG  
ATTATCCAGATGCTTTCCTACTATCTGAAATGCCATTTTCATCTATTGGTTCCATTATT  
TCTCTACAAGAATTATCTTTTTTTTTATTTATCTTATGAGAAAGGCTTTCTTCCCAA  
CGTAAATCTTTGAGAACTTTAAATGTAACAACCTTCAATTGAATGGTTACAAGCCCT  
ACCCCTAGTG

AQU12

ATTATTAGACAAGAAAGGGGGAAAAAAGAAGCTTTTGGAACCTTAGGAATAATTT  
ATGCCATGATAGCTATCGGATTATTAGGATTCGTAGTCTGAGCTCACCATATATT  
TACAGTAGGGATAGATGTAGATACCCGAGCTTACTTCACTTCAGCAACTATAATT  
ATTGCGGTTCCAACCTGGGATTAAAGTCTTTAGATGACTAGCCACCTTTCATGGAA  
CTCAAATTTTAAATAGACCAGTAACCCTGTGAGCTTTAGGTTTTGTATTTTTATTT  
ACAGTAGGAGGATTAACAGGGGTAATTTTAGCTAATTCTTCAATTGATATTATTCT  
TCACGATACTTACTATGTAGTAGCTCATTTCCTACTATGTTCTTTCTATAGGAGCTG  
TATTTGCAATTATAGCCGGAATTGTCCAATGATTCCCATTATTTACCGGACTAAC  
CTTAAATAATTTTTTTTTAAAAACCCAATTTACTATATTTTTAGGTGTAAATTTA  
ACATTTTTTCCCAACACTTTTTAGGGCTAAGAGGAATGCCTCGGCGATATTCGG  
ATTATCCAGATGCTTTCCTACTATCTGAAATGCCATTTTCATCTATTGGTTCCATTATT  
TCTCTACAAGAATTATCTTTTTTTTTATTTATCTTATGAGAAAGGCTTTCTTCCCAA  
CGTAAATCTTTGAGAACTTTAAATGTAACAACCTTCAATTGAATGGTTACAAGCCCT  
ACCCCTAGTG

AQU13

ATTATTAGACAAGAAAGGGGGAAAAAAGAAGCTTTTGGAACCTTAGGAATAATTT  
ATGCCATGATAGCTATCGGATTATTAGGATTCGTAGTTTGGAGCTCACCATATATT  
TACAGTAGGGATAGATGTAGATACCCGAGCTTACTTCACTTCAGCAACTATAATT  
ATTGCGGTTCCAACCTGGGATTAAAGTCTTTAGATGACTAGCCACCTTTCATGGAA  
CTCAAATTTTAAATAGACCAGTAACCCTGTGAGCTTTAGGTTTTGTATTTTTATTT  
ACAGTAGGAGGATTAACAGGGGTAATTTTAGCTAATTCTTCAATTGATATTATTCT  
TCACGATACTTACTATGTAGTAGCTCATTTCCTACTATGTTCTTTCTATAGGAGCTG  
TATTTGCAATTATAGCCGGAATTGTCCAATGATTCCCATTATTTACCGGACTAAC  
CTTAAATAATTTTTTTTTAAAAACCCAATTTACTATATTTTTAGGTGTAAATTTA  
ACATTTTTTCCCAACACTTTTTAGGGCTAAGAGGAATGCCTCGGCGATATTCGG  
ATTATCCAGATGCTTTCCTACTATCTGAAATGCCATTTTCATCTATTGGTTCCATTATT  
TCTCTACAAGAATTATCTTTTTTTTTATTTATCTTATGAGAAAGGCTTTCTTCCCAA  
CGTAAATCTTTGAGAACTTTAAATGTAACAACCTTCAATTGAATGGTTACAAGCCCT  
ACCCCTAGTG

AQU14

ATTATTAGACAAGAAAGGGGGAAAAAAGAAGCTTTTGGAACCTTAGGAATAATTT  
ATGCCATGATAGCTATCGGATTATTAGGATTCGTAGTTTGGAGCTCACCATATATT  
TACAGTAGGGATAGATGTAGATACCCGAGCTTACTTCACTTCAGCAACTATAATT  
ATTGCGGTTCCAACCTGGGATTAAAGTCTTTAGATGACTAGCCACCTTTCATGGAA  
CTCAAATTTTAAATAGACCAGTAACCCTGTGAGCTTTAGGTTTTGTATTTTTATTT  
ACAGTAGGAGGATTAACAGGGGTAATTTTAGCTAATTCTTCAATTGATATTATTCT  
TCACGATACTTACTATGTAGTAGCTCATTTCCTACTATGTTCTTTCTATAGGAGCTG  
TATTTGCAATTATAGCCGGAATTGTCCAATGATTCCCATTATTTACCGGACTAAC  
CTTAAATAATTTTTTTTTAAAAACCCAATTTACTATATTTTTAGGTGTAAATTTA  
ACATTTTTTCCCAACACTTTTTAGGGCTAAGAGGAATGCCTCGGCGATATTCGG  
ATTATCCAGATGCTTTCCTACTATCTGAAATGCCATTTTCATCTATTGGTTCCATTATT

TCTCTCACAGAATTATCTTTTTTTTATTTATCTTATGAGAAAGGCTTTCTTCCCAA  
CGTAAATCTTTGAGAACTTTAAATGTAACAACCTTCAATTGAATGGTTACAAGCCCT  
ACCCCCTAGTG

AQU4

ATTATTAGACAAGAAAGGGGGGAAAAAAGAAGCTTTTGGAACCTTAGGAATAATTT  
ATGCCATGATAGCTATCGGATTATTAGGATTCGTAGTCTGAGCTCACCATATATT  
TACAGTAGGGATAGATGTAGATACCCGAGCTTACTTCACTTCAGCAACTATAATT  
ATTGCGGTTCCAACCTGGGATTAAGTCTTTAGATGACTAGCCACCTTTTCATGGAA  
CTCAAATTTTAAATAGACCAGTAACCCTGTGAGCTTTAGGTTTTGTATTTTTATTT  
ACAGTAGGAGGATTAACAGGGGTAATTTTAGCTAATTCTTCAATTGATATTATTCT  
TCACGATACTTACTATGTAGTAGCTCATTTTCACTATGTTCTTTCTATAGGAGCTG  
TATTTGCAATTATAGCCGGAATTGTCCAATGATTCCCATTATTTACCGGACTAAC  
CTTAAATAATTTTTTTTTTAAAAACCCAATTTATTACTATATTTTTAGGTGTAAATTTA  
ACATTTTTTCCCAACACTTTTTAGGGCTAAGAGGAATGCCTCGGCGATATTCGG  
ATTATCCAGATGCTTTCCTACTATCTGAAATGCCATTTTCATCTATTGGTTCCATTATT  
TCTCTCACAGAATTATCTTTTTTTTATTTATCTTATGAGAAAGGCTTTCTTCCCAA  
CGTAAATCTTTGAGAACTTTAAATGTAACAACCTTCAATTGAATGGTTACAAGCCCT  
ACCCCCTAGTG

bj1

ATTATTAGACAAGAAAGGGGGGAAAAAAGAAGCTTTTGGAACCTTAGGAATAATTT  
ATGCCATGATAGCTATCGGATTATTAGGATTCGTAGTTTGGAGCTCACCATATATT  
TACAGTAGGGATAGATGTAGATACCCGAGCTTACTTCACTTCAGCAACTATAATT  
ATTGCGGTTCCAACCTGGGATTAAGTCTTTAGATGACTAGCCACCTTTTCATGGAA  
CTCAAATTTTAAATAGACCAGTAACCCTGTGAGCTTTAGGTTTTGTATTTTTATTT  
ACAGTAGGAGGATTAACAGGGGTAATTTTAGCTAATTCTTCAATTGATATTATTCT  
TCACGATACTTACTATGTAGTAGCTCATTTTCACTATGTTCTTTCTATAGGAGCTG  
TATTTGCAATTATAGCCGGAATTGTCCAATGATTCCCATTATTTACCGGACTAAC  
CTTAAATAATTTTTTTTTTAAAAACCCAATTTATTACTATATTTTTAGGTGTAAATTTA  
ACATTTTTTCCCAACACTTTTTAGGGCTAAGAGGAATGCCTCGGCGATATTCGG  
ATTATCCAGATGCTTTCCTACTATCTGAAATGCCATTTTCATCTATTGGTTCCATTATT  
TCTCTCACAGAATTATCTTTTTTTTATTTATCTTATGAGAAAGGCTTTCTTCCCAA  
CGTAAATCTTTGAGAACTTTAAATGTAACAACCTTCAATTGAATGGTTACAAGCCCT  
ACCCCCTAGTG

BJA2

ATTATTAGACAAGAAAGGGGGGAAAAAAGAAGCTTTTGGAACCTTAGGAATAATTT  
ATGCCATGATAGCTATCGGATTATTAGGATTCGTAGTTTGGAGCTCACCATATATT  
TACAGTAGGGATAGATGTAGATACCCGAGCTTACTTCACTTCAGCAACTATAATT  
ATTGCGGTTCCAACCTGGGATTAAGTCTTTAGATGACTAGCCACCTTTTCATGGAA  
CTCAAATTTTAAATAGACCAGTAACCCTGTGAGCTTTAGGTTTTGTATTTTTATTT  
ACAGTAGGAGGATTAACAGGGGTAATTTTAGCTAATTCTTCAATTGATATTATTCT  
TCACGATACTTACTATGTAGTAGCTCATTTTCACTATGTTCTTTCTATAGGAGCTG  
TATTTGCAATTATAGCCGGAATTGTCCAATGATTCCCATTATTTACCGGACTAAC  
CTTAAATAATTTTTTTTTTAAAAACCCAATTTATTACTATATTTTTAGGTGTAAATTTA  
ACATTTTTTCCCAACACTTTTTAGGGCTAAGAGGAATGCCTCGGCGATATTCGG  
ATTATCCAGATGCTTTCCTACTATCTGAAATGCCATTTTCATCTATTGGTTCCATTATT  
TCTCTCACAGAATTATCTTTTTTTTATTTATCTTATGAGAAAGGCTTTCTTCCCAA  
CGTAAATCTTTGAGAACTTTAAATGTAACAACCTTCAATTGAATGGTTACAAGCCCT  
ACCCCCTAGTG

BJA4

ATTATTAGACAAGAAAGGGGGGAAAAAAGAAGCTTTTGGAACCTTAGGAATAATTT

ATGCCATGATAGCTATCGGATTATTAGGATTCGTAGTTTGAGCTCACCATATATT  
TACAGTAGGGATAGATGTAGATACCCGAGCTTACTTCACTTCAGCAACTATAATT  
ATTGCGGTTCCAACCTGGGATTAAGTCTTTAGATGACTAGCCACCTTTCATGGAA  
CTCAAATTTTAAATAGACCAGTAACCCTGTGAGCTTTAGGTTTTGTATTTTTATTT  
ACAGTAGGAGGATTAACAGGGGTAATTTTAGCTAATTCTTCAATTGATATTATTCT  
TCACGATACTTACTATGTAGTAGCTCATTTCCTTCTTCTATAGGAGCTG  
TATTTGCAATTATAGCCGGAATTGTCCAATGATTCCCATTATTTACCGGACTAAC  
CTTAAATAATTTTTTTTTTAAAAACCCAATTTATTACTATATTTTTTAGGTGTAAATTTA  
ACATTTTTTCCCAACACTTTTTAGGGCTAAGAGGAATGCCTCGGCGATATTCGG  
ATTATCCAGATGCTTTCCTATCTGAAATGCCATTTTCATCTATTGGTTCCATTATT  
TCTCTCACAGAATTATCTTTTTTTTTATTTATCTTATGAGAAAGGCTTTCTTCCCAA  
CGTAAATCTTTGAGAACTTTAAATGTAACAACCTTCAATTGAATGGTTACAAGCCCT  
ACCCCTAGTG

CAM1

ATTATTAGACAAGAAAGGGGGGAAAAAAGAAGCTTTTGGAACCTTAGGAATAATTT  
ATGCCATGATAGCTATCGGATTATTAGGATTCGTAGTTTGAGCTCACCATATATT  
TACAGTAGGGATAGATGTAGATACCCGAGCTTACTTCACTTCAGCAACTATAATT  
ATTGCGGTTCCAACCTGGGATTAAGTCTTTAGATGACTAGCCACCTTTCATGGAA  
CTCAAATTTTAAATAGACCAGTAACCCTGTGAGCTTTAGGTTTTGTATTTTTATTT  
ACAGTAGGAGGATTAACAGGGGTAATTTTAGCTAATTCTTCAATTGATATTATTCT  
TCACGATACTTACTATGTAGTAGCTCATTTCCTTCTTCTATAGGAGCTG  
TATTTGCAATTATAGCCGGAATTGTCCAATGATTCCCATTATTTACCGGACTAAC  
CTTAAATAATTTTTTTTTTAAAAACCCAATTTATTACTATATTTTTTAGGTGTAAATTTA  
ACATTTTTTCCCAACACTTTTTAGGGCTAAGAGGAATGCCTCGGCGATATTCGG  
ATTATCCAGATGCTTTCCTATCTGAAATGCCATTTTCATCTATTGGTTCCATTATT  
TCTCTCACAGAATTATCTTTTTTTTTATTTATCTTATGAGAAAGGCTTTCTTCCCAA  
CGTAAATCTTTGAGAACTTTAAATGTAACAACCTTCAATTGAATGGTTACAAGCCCT  
ACCCCTAGTG

CAM2

ATTATTAGACAAGAAAGGGGGGAAAAAAGAAGCTTTTGGAACCTTAGGAATAATTT  
ATGCCATGATAGCTATCGGATTATTAGGATTCGTAGTTTGAGCTCACCATATATT  
TACAGTAGGGATAGATGTAGATACCCGAGCTTACTTCACTTCAGCAACTATAATT  
ATTGCGGTTCCAACCTGGGATTAAGTCTTTAGATGACTAGCCACCTTTCATGGAA  
CTCAAATTTTAAATAGACCAGTAACCCTGTGAGCTTTAGGTTTTGTATTTTTATTT  
ACAGTAGGAGGATTAACAGGGGTAATTTTAGCTAATTCTTCAATTGATATTATTCT  
TCACGATACTTACTATGTAGTAGCTCATTTCCTTCTTCTATAGGAGCTG  
TATTTGCAATTATAGCCGGAATTGTCCAATGATTCCCATTATTTACCGGACTAAC  
CTTAAATAATTTTTTTTTTAAAAACCCAATTTATTACTATATTTTTTAGGTGTAAATTTA  
ACATTTTTTCCCAACACTTTTTAGGGCTAAGAGGAATGCCTCGGCGATATTCGG  
ATTATCCAGATGCTTTCCTATCTGAAATGCCATTTTCATCTATTGGTTCCATTATT  
TCTCTCACAGAATTATCTTTTTTTTTATTTATCTTATGAGAAAGGCTTTCTTCCCAA  
CGTAAATCTTTGAGAACTTTAAATGTAACAACCTTCAATTGAATGGTTACAAGCCCT  
ACCCCTAGTG

CMO1\_1

ATTATTAGACAAGAAAGGGGGGAAAAAAGAAGCTTTTGGAACCTTAGGAATAATTT  
ATGCCATGATAGCTATCGGATTATTAGGATTCGTAGTTTGAGCTCACCATATATT  
TACAGTAGGGATAGATGTAGATACCCGAGCTTACTTCACTTCAGCAACTATAATT  
ATTGCGGTTCCAACCTGGGATTAAGTCTTTAGATGACTAGCCACCTTTCATGGAA  
CTCAAATTTTAAATAGACCAGTAACCCTGTGAGCTTTAGGTTTTGTATTTTTATTT  
ACAGTAGGAGGATTAACAGGGGTAATTTTAGCTAATTCTTCAATTGATATTATTCT

TCACGATACTTACTATGTAGTAGCTCATTTCCTACTATGTTCTTTCTATAGGAGCTG  
TATTTGCAATTATAGCCGGAATTGTCCAATGATTCCCATTATTTACCGGACTAAC  
CTTAAATAATTTTTTTTTAAAAACCCAATTTACTATATTTTTAGGTGTAAATTTA  
ACATTTTTTCCCAACACTTTTTAGGGCTAAGAGGAATGCCTCGGCGATATTCGG  
ATTATCCAGATGCTTTCCTACTATCTGAAATGCCATTTTCATCTATTGGTTCCATTATT  
TCTCTCACAGAATTATCTTTTTTTTTATTTATCTTATGAGAAAGGCTTTCTTCCCAA  
CGTAAATCTTTGAGAACTTTAAATGTAACAACCTTCAATTGAATGGTTACAAGCCCT  
ACCCCTAGTG

CMO1\_2

ATTATTAGACAAGAAAGGGGGAAAAAAGAAGCTTTTGGAACCTTAGGAATAATTT  
ATGCCATGATAGCTATCGGATTATTAGGATTCGTAGTTTGAGCTCACCATATATT  
TACAGTAGGGATAGATGTAGATACCCGAGCTTACTTCACTTCAGCAACTATAATT  
ATTGCGGTTCCAACCTGGGATTAAGTCTTTAGATGACTAGCCACCTTTCATGGAA  
CTCAAATTTTAAATAGACCAGTAACCCTGTGAGCTTTAGGTTTTGTATTTTTATTT  
ACAGTAGGAGGATTAACAGGGGTAATTTTAGCTAATTCTTCAATTGATATTATTCT  
TCACGATACTTACTATGTAGTAGCTCATTTCCTACTATGTTCTTTCTATAGGAGCTG  
TATTTGCAATTATAGCCGGAATTGTCCAATGATTCCCATTATTTACCGGACTAAC  
CTTAAATAATTTTTTTTTAAAAACCCAATTTACTATATTTTTAGGTGTAAATTTA  
ACATTTTTTCCCAACACTTTTTAGGGCTAAGAGGAATGCCTCGGCGATATTCGG  
ATTATCCAGATGCTTTCCTACTATCTGAAATGCCATTTTCATCTATTGGTTCCATTATT  
TCTCTCACAGAATTATCTTTTTTTTTATTTATCTTATGAGAAAGGCTTTCTTCCCAA  
CGTAAATCTTTGAGAACTTTAAATGTAACAACCTTCAATTGAATGGTTACAAGCCCT  
ACCCCTAGTG

CMO2\_1

ATTATTAGACAAGAAAGGGGGAAAAAAGAAGCTTTTGGAACCTTAGGAATAATTT  
ATGCCATGATAGCTATCGGATTATTAGGATTCGTAGTTTGAGCTCACCATATATT  
TACAGTAGGGATAGATGTAGATACCCGAGCTTACTTCACTTCAGCAACTATAATT  
ATTGCGGTTCCAACCTGGGATTAAGTCTTTAGATGACTAGCCACCTTTCATGGAA  
CTCAAATTTTAAATAGACCAGTAACCCTGTGAGCTTTAGGTTTTGTATTTTTATTT  
ACAGTAGGAGGATTAACAGGGGTAATTTTAGCTAATTCTTCAATTGATATTATTCT  
TCACGATACTTACTATGTAGTAGCTCATTTCCTACTATGTTCTTTCTATAGGAGCTG  
TATTTGCAATTATAGCCGGAATTGTCCAATGATTCCCATTATTTACCGGACTAAC  
CTTAAATAATTTTTTTTTAAAAACCCAATTTACTATATTTTTAGGTGTAAATTTA  
ACATTTTTTCCCAACACTTTTTAGGGCTAAGAGGAATGCCTCGGCGATATTCGG  
ATTATCCAGATGCTTTCCTACTATCTGAAATGCCATTTTCATCTATTGGTTCCATTATT  
TCTCTCACAGAATTATCTTTTTTTTTATTTATCTTATGAGAAAGGCTTTCTTCCCAA  
CGTAAATCTTTGAGAACTTTAAATGTAACAACCTTCAATTGAATGGTTACAAGCCCT  
ACCCCTAGTG

CMO2\_2

ATTATTAGACAAGAAAGGGGGAAAAAAGAAGCTTTTGGAACCTTAGGAATAATTT  
ATGCCATGATAGCTATCGGATTATTAGGATTCGTAGTTTGAGCTCACCATATATT  
TACAGTAGGGATAGATGTAGATACCCGAGCTTACTTCACTTCAGCAACTATAATT  
ATTGCGGTTCCAACCTGGGATTAAGTCTTTAGATGACTAGCCACCTTTCATGGAA  
CTCAAATTTTAAATAGACCAGTAACCCTGTGAGCTTTAGGTTTTGTATTTTTATTT  
ACAGTAGGAGGATTAACAGGGGTAATTTTAGCTAATTCTTCAATTGATATTATTCT  
TCACGATACTTACTATGTAGTAGCTCATTTCCTACTATGTTCTTTCTATAGGAGCTG  
TATTTGCAATTATAGCCGGAATTGTCCAATGATTCCCATTATTTACCGGACTAAC  
CTTAAATAATTTTTTTTTAAAAACCCAATTTACTATATTTTTAGGTGTAAATTTA  
ACATTTTTTCCCAACACTTTTTAGGGCTAAGAGGAATGCCTCGGCGATATTCGG  
ATTATCCAGATGCTTTCCTACTATCTGAAATGCCATTTTCATCTATTGGTTCCATTATT

TCTCTCACAGAATTATCTTTTTTTTATTTATCTTATGAGAAAGGCTTTCTTCCCAA  
CGTAAATCTTTGAGAACTTTAAATGTAACAACCTTCAATTGAATGGTTACAAGCCCT  
ACCCCCTAGTG

COI1

ATTATTAGACAAGAAAGGGGGGAAAAAAGAAGCTTTTGGAACCTTAGGAATAATTT  
ATGCCATGATAGCTATCGGATTATTAGGATTCGTAGTTTGAGCTCACCATATATT  
TACAGTAGGGATAGATGTAGATACCCGAGCTTACTTCACTTCAGCAACTATAATT  
ATTGCGGTTCCAACCTGGGATTAAGTCTTTAGATGACTAGCCACCTTTTCATGGAA  
CTCAAATTTTAAATAGACCAGTAACCCTGTGAGCTTTAGGTTTTGTATTTTTATTT  
ACAGTAGGAGGATTAACAGGGGTAATTTTAGCTAATTCTTCAATTGATATTATTCT  
TCACGATACTTACTATGTAGTAGCTCATTTTCACTATGTTCTTTCTATAGGAGCTG  
TATTTGCAATTATAGCCGGAATTGTCCAATGATTCCCATTATTTACCGGACTAAC  
CTTAAATAATTTTTTTTTTAAAAACCCAATTTATTACTATATTTTTAGGTGTAAATTTA  
ACATTTTTTCCCAACACTTTTTAGGGCTAAGAGGAATGCCTCGGCGATATTCGG  
ATTATCCAGATGCTTTCCTACTATCTGAAATGCCATTTTCATCTATTGGTTCCATTATT  
TCTCTCACAGAATTATCTTTTTTTTATTTATCTTATGAGAAAGGCTTTCTTCCCAA  
CGTAAATCTTTGAGAACTTTAAATGTAACAACCTTCAATTGAATGGTTACAAGCCCT  
ACCCCCTAGTG

CSJ1

ATTATTAGACAAGAAAGGGGGGAAAAAAGAAGCTTTTGGAACCTTAGGAATAATTT  
ATGCCATGATAGCTATCGGATTATTAGGATTCGTAGTTTGAGCTCACCATATATT  
TACAGTAGGGATAGATGTAGATACCCGAGCTTACTTCACTTCAGCAACTATAATT  
ATTGCGGTTCCAACCTGGGATTAAGTCTTTAGATGACTAGCCACCTTTTCATGGAA  
CTCAAATTTTAAATAGACCAGTAACCCTGTGAGCTTTAGGTTTTGTATTTTTATTT  
ACAGTAGGAGGATTAACAGGGGTAATTTTAGCTAATTCTTCAATTGATATTATTCT  
TCACGATACTTACTATGTAGTAGCTCATTTTCACTATGTTCTTTCTATAGGAGCTG  
TATTTGCAATTATAGCCGGAATTGTCCAATGATTCCCATTATTTACCGGACTAAC  
CTTAAATAATTTTTTTTTTAAAAACCCAATTTATTACTATATTTTTAGGTGTAAATTTA  
ACATTTTTTCCCAACACTTTTTAGGGCTAAGAGGAATGCCTCGGCGATATTCGG  
ATTATCCAGATGCTTTCCTACTATCTGAAATGCCATTTTCATCTATTGGTTCCATTATT  
TCTCTCACAGAATTATCTTTTTTTTATTTATCTTATGAGAAAGGCTTTCTTCCCAA  
CGTAAATCTTTGAGAACTTTAAATGTAACAACCTTCAATTGAATGGTTACAAGCCCT  
ACCCCCTAGTG

ERV1

ATTATTAGACAAGAAAGGGGGGAAAAAAGAAGCTTTTGGAACCTTAGGAATAATTT  
ATGCCATGATAGCTATCGGATTATTAGGATTCGTAGTTTGAGCTCACCATATATT  
TACAGTAGGGATAGATGTAGATACCCGAGCTTACTTCACTTCAGCAACTATAATT  
ATTGCGGTTCCAACCTGGGATTAAGTCTTTAGATGACTAGCCACCTTTTCATGGAA  
CTCAAATTTTAAATAGACCAGTAACCCTGTGAGCTTTAGGTTTTGTATTTTTATTT  
ACAGTAGGAGGATTAACAGGGGTAATTTTAGCTAATTCTTCAATTGATATTATTCT  
TCACGATACTTACTATGTAGTAGCTCATTTTCACTATGTTCTTTCTATAGGAGCTG  
TATTTGCAATTATAGCCGGAATTGTCCAATGATTCCCATTATTTACCGGACTAAC  
CTTAAATAATTTTTTTTTTAAAAACCCAATTTATTACTATATTTTTAGGTGTAAATTTA  
ACATTTTTTCCCAACACTTTTTAGGGCTAAGAGGAATGCCTCGGCGATATTCGG  
ATTATCCAGATGCTTTCCTACTATCTGAAATGCCATTTTCATCTATTGGTTCCATTATT  
TCTCTCACAGAATTATCTTTTTTTTATTTATCTTATGAGAAAGGCTTTCTTCCCAA  
CGTAAATCTTTGAGAACTTTAAATGTAACAACCTTCAATTGAATGGTTACAAGCCCT  
ACCCCCTAGTG

ERV2

ATTATTAGACAAGAAAGGGGGGAAAAAAGAAGCTTTTGGAACCTTAGGAATAATTT

ATGCCATGATAGCTATCGGATTATTAGGATTCGTAGTTTGAGCTCACCATATATT  
TACAGTAGGGATAGATGTAGATACCCGAGCTTACTTCACTTCAGCAACTATAATT  
ATTGCGGTTCCAACCTGGGATTAAGTCTTTAGATGACTAGCCACCTTTCATGGAA  
CTCAAATTTTAAATAGACCAGTAACCCTGTGAGCTTTAGGTTTTGTATTTTTATTT  
ACAGTAGGAGGATTAACAGGGGTAATTTTAGCTAATTCTTCAATTGATATTATTCT  
TCACGATACTTACTATGTAGTAGCTCATTTCCTTCTTCTATAGGAGCTG  
TATTTGCAATTATAGCCGGAATTGTCCAATGATTCCCATTATTTACCGGACTAAC  
CTTAAATAATTTTTTTTTTAAAAACCCAATTTATTACTATATTTTTTAGGTGTAAATTTA  
ACATTTTTTCCCAACACTTTTTAGGGCTAAGAGGAATGCCTCGGCGATATTCGG  
ATTATCCAGATGCTTTCCTTCTGAAATGCCATTTTCTATTGGTTCCATTATT  
TCTCTCACAAGAATTATCTTTTTTTTTATTTATCTTATGAGAAAGGCTTTCTTCCCAA  
CGTAAATCTTTGAGAACTTTAAATGTAACAACCTTCAATTGAATGGTTACAAGCCCT  
ACCCCTAGTG

GOV1

ATTATTAGACAAGAAAGGGGGAAAAAAGAAGCTTTTGGAACCTTAGGAATAATTT  
ATGCCATGATAGCTATCGGATTATTAGGATTCGTAGTTTGAGCTCACCATATATT  
TACAGTAGGGATAGATGTAGATACCCGAGCTTACTTCACTTCAGCAACTATAATT  
ATTGCGGTTCCAACCTGGGATTAAGTCTTTAGATGACTAGCCACCTTTCATGGAA  
CTCAAATTTTAAATAGACCAGTAACCCTGTGAGCTTTAGGTTTTGTATTTTTATTT  
ACAGTAGGAGGATTAACAGGGGTAATTTTAGCTAATTCTTCAATTGATATTATTCT  
TCACGATACTTACTATGTAGTAGCTCATTTCCTTCTTCTATAGGAGCTG  
TATTTGCAATTATAGCCGGAATTGTCCAATGATTCCCATTATTTACCGGACTAAC  
CTTAAATAATTTTTTTTTTAAAAACCCAATTTATTACTATATTTTTTAGGTGTAAATTTA  
ACATTTTTTCCCAACACTTTTTAGGGCTAAGAGGAATGCCTCGGCGATATTCGG  
ATTATCCAGATGCTTTCCTTCTGAAATGCCATTTTCTATTGGTTCCATTATT  
TCTCTCACAAGAATTATCTTTTTTTTTATTTATCTTATGAGAAAGGCTTTCTTCCCAA  
CGTAAATCTTTGAGAACTTTAAATGTAACAACCTTCAATTGAATGGTTACAAGCCCT  
ACCCCTAGTG

GOV2

ATTATTAGACAAGAAAGGGGGAAAAAAGAAGCTTTTGGAACCTTAGGAATAATTT  
ATGCCATGATAGCTATCGGATTATTAGGATTCGTAGTTTGAGCTCACCATATATT  
TACAGTAGGGATAGATGTAGATACCCGAGCTTACTTCACTTCAGCAACTATAATT  
ATTGCGGTTCCAACCTGGGATTAAGTCTTTAGATGACTAGCCACCTTTCATGGAA  
CTCAAATTTTAAATAGACCAGTAACCCTGTGAGCTTTAGGTTTTGTATTTTTATTT  
ACAGTAGGAGGATTAACAGGGGTAATTTTAGCTAATTCTTCAATTGATATTATTCT  
TCACGATACTTACTATGTAGTAGCTCATTTCCTTCTTCTATAGGAGCTG  
TATTTGCAATTATAGCCGGAATTGTCCAATGATTCCCATTATTTACCGGACTAAC  
CTTAAATAATTTTTTTTTTAAAAACCCAATTTATTACTATATTTTTTAGGTGTAAATTTA  
ACATTTTTTCCCAACACTTTTTAGGGCTAAGAGGAATGCCTCGGCGATATTCGG  
ATTATCCAGATGCTTTCCTTCTGAAATGCCATTTTCTATTGGTTCCATTATT  
TCTCTCACAAGAATTATCTTTTTTTTTATTTATCTTATGAGAAAGGCTTTCTTCCCAA  
CGTAAATCTTTGAGAACTTTAAATGTAACAACCTTCAATTGAATGGTTACAAGCCCT  
ACCCCTAGTG

HEM1

ATTATTAGACAAGAAAGGGGGAAAAAAGAAGCTTTTGGAACCTTAGGAATAATTT  
ATGCCATGATAGCTATCGGATTATTAGGATTCGTAGTTTGAGCTCACCATATATT  
TACAGTAGGGATAGATGTAGATACCCGAGCTTACTTCACTTCAGCAACTATAATT  
ATTGCGGTTCCAACCTGGGATTAAGTCTTTAGATGACTAGCCACCTTTCATGGAA  
CTCAAATTTTAAATAGACCAGTAACCCTGTGAGCTTTAGGTTTTGTATTTTTATTT  
ACAGTAGGAGGATTAACAGGGGTAATTTTAGCTAATTCTTCAATTGATATTATTCT



TCACGATACTTACTATGTAGTAGCTCATTTCCTACTATGTTCTTTCTATAGGAGCTG  
TATTTGCAATTATAGCCGGAATTGTCCAATGATTCCCATTATTTACCGGACTAAC  
CTTAAATAATTTTTTTTTAAAAACCCAATTTACTATATTTTTAGGTGTAAATTTA  
ACATTTTTTCCCAACACTTTTTAGGGCTAAGAGGAATGCCTCGGCGATATTCGG  
ATTATCCAGATGCTTTCCTACTATCTGAAATGCCATTTTCATCTATTGGTTCCATTATT  
TCTCTACAAGAATTATCTTTTTTTTTATTTATCTTATGAGAAAGGCTTTCTTCCCAA  
CGTAAATCTTTGAGAACTTTAAATGTAACAACCTTCAATTGAATGGTTACAAGCCCT  
ACCCCTAGTG

HEM2

ATTATTAGACAAGAAAGGGGGAAAAAAGAAGCTTTTGGAACCTTAGGAATAATTT  
ATGCCATGATAGCTATCGGATTATTAGGATTCGTAGTTTGAGCTCACCATATATT  
TACAGTAGGGATAGATGTAGATACCCGAGCTTACTTCACTTCAGCAACTATAATT  
ATTGCGGTTCCAACCTGGGATTAAGTCTTTAGATGACTAGCCACCTTTCATGGAA  
CTCAAATTTTAAATAGACCAGTAACCCTGTGAGCTTTAGGTTTTGTATTTTTATTT  
ACAGTAGGAGGATTAACAGGGGTAATTTTAGCTAATTCTTCAATTGATATTATTCT  
TCACGATACTTACTATGTAGTAGCTCATTTCCTACTATGTTCTTTCTATAGGAGCTG  
TATTTGCAATTATAGCCGGAATTGTCCAATGATTCCCATTATTTACCGGACTAAC  
CTTAAATAATTTTTTTTTAAAAACCCAATTTACTATATTTTTAGGTGTAAATTTA  
ACATTTTTTCCCAACACTTTTTAGGGCTAAGAGGAATGCCTCGGCGATATTCGG  
ATTATCCAGATGCTTTCCTACTATCTGAAATGCCATTTTCATCTATTGGTTCCATTATT  
TCTCTACAAGAATTATCTTTTTTTTTATTTATCTTATGAGAAAGGCTTTCTTCCCAA  
CGTAAATCTTTGAGAACTTTAAATGTAACAACCTTCAATTGAATGGTTACAAGCCCT  
ACCCCTAGTG

HER1

ATTATTAGACAAGAAAGGGGGAAAAAAGAAGCTTTTGGAACCTTAGGAATAATTT  
ATGCCATGATAGCTATCGGATTATTAGGATTCGTAGTTTGAGCTCACCATATATT  
TACAGTAGGGATAGATGTAGATACCCGAGCTTACTTCACTTCAGCAACTATAATT  
ATTGCGGTTCCAACCTGGGATTAAGTCTTTAGATGACTAGCCACCTTTCATGGAA  
CTCAAATTTTAAATAGACCAGTAACCCTGTGAGCTTTAGGTTTTGTATTTTTATTT  
ACAGTAGGAGGATTAACAGGGGTAATTTTAGCTAATTCTTCAATTGATATTATTCT  
TCACGATACTTACTATGTAGTAGCTCATTTCCTACTATGTTCTTTCTATAGGAGCTG  
TATTTGCAATTATAGCCGGAATTGTCCAATGATTCCCATTATTTACCGGACTAAC  
CTTAAATAATTTTTTTTTAAAAACCCAATTTACTATATTTTTAGGTGTAAATTTA  
ACATTTTTTCCCAACACTTTTTAGGGCTAAGAGGAATGCCTCGGCGATATTCGG  
ATTATCCAGATGCTTTCCTACTATCTGAAATGCCATTTTCATCTATTGGTTCCATTATT  
TCTCTACAAGAATTATCTTTTTTTTTATTTATCTTATGAGAAAGGCTTTCTTCCCAA  
CGTAAATCTTTGAGAACTTTAAATGTAACAACCTTCAATTGAATGGTTACAAGCCCT  
ACCCCTAGTG

HER2

ATTATTAGACAAGAAAGGGGGAAAAAAGAAGCTTTTGGAACCTTAGGAATAATTT  
ATGCCATGATAGCTATCGGATTATTAGGATTCGTAGTTTGAGCTCACCATATATT  
TACAGTAGGGATAGATGTAGATACCCGAGCTTACTTCACTTCAGCAACTATAATT  
ATTGCGGTTCCAACCTGGGATTAAGTCTTTAGATGACTAGCCACCTTTCATGGAA  
CTCAAATTTTAAATAGACCAGTAACCCTGTGAGCTTTAGGTTTTGTATTTTTATTT  
ACAGTAGGAGGATTAACAGGGGTAATTTTAGCTAATTCTTCAATTGATATTATTCT  
TCACGATACTTACTATGTAGTAGCTCATTTCCTACTATGTTCTTTCTATAGGAGCTG  
TATTTGCAATTATAGCCGGAATTGTCCAATGATTCCCATTATTTACCGGACTAAC  
CTTAAATAATTTTTTTTTAAAAACCCAATTTACTATATTTTTAGGTGTAAATTTA  
ACATTTTTTCCCAACACTTTTTAGGGCTAAGAGGAATGCCTCGGCGATATTCGG  
ATTATCCAGATGCTTTCCTACTATCTGAAATGCCATTTTCATCTATTGGTTCCATTATT

TCTCTCACAAGAATTATCTTTTTTTTATTTATCTTATGAGAAAGGCTTTCTTCCCAA  
CGTAAATCTTTGAGAACTTTAAATGTAACAACCTTCAATTGAATGGTTACAAGCCCT  
ACCCCCTAGTG

HEV1

ATTATTAGACAAGAAAGGGGGGAAAAAAGAAGCTTTTGGAACCTTAGGAATAATTT  
ATGCCATGATAGCTATCGGATTATTAGGATTCGTAGTTTGAGCTCACCATATATT  
TACAGTAGGGATAGATGTAGATACCCGAGCTTACTTCACTTCAGCAACTATAATT  
ATTGCGGTTCCAACCTGGGATTAAGTCTTTAGATGACTAGCCACCTTTTCATGGAA  
CTCAAATTTTAAATAGACCAGTAACCCTGTGAGCTTTAGGTTTTGTATTTTTATTT  
ACAGTAGGAGGATTAACAGGGGTAATTTTAGCTAATTCTTCAATTGATATTATTCT  
TCACGATACTTACTATGTAGTAGCTCATTTTCACTATGTTCTTTCTATAGGAGCTG  
TATTTGCAATTATAGCCGGAATTGTCCAATGATTCCCATTATTTACCGGACTAAC  
CTTAAATAATTTTTTTTTTAAAAACCCAATTTATTACTATATTTTTAGGTGTAAATTTA  
ACATTTTTTCCCCAACACTTTTTAGGGCTAAGAGGAATGCCTCGGCGATATTCGG  
ATTATCCAGATGCTTTCCTACTATCTGAAATGCCATTTTCATCTATTGGTTCCATTATT  
TCTCTCACAAGAATTATCTTTTTTTTATTTATCTTATGAGAAAGGCTTTCTTCCCAA  
CGTAAATCTTTGAGAACTTTAAATGTAACAACCTTCAATTGAATGGTTACAAGCCCT  
ACCCCCTAGTG

HEV1\_2

ATTATTAGACAAGAAAGGGGGGAAAAAAGAAGCTTTTGGAACCTTAGGAATAATTT  
ATGCCATGATAGCTATCGGATTATTAGGATTCGTAGTTTGAGCTCACCATATATT  
TACAGTAGGGATAGATGTAGATACCCGAGCTTACTTCACTTCAGCAACTATAATT  
ATTGCGGTTCCAACCTGGGATTAAGTCTTTAGATGACTAGCCACCTTTTCATGGAA  
CTCAAATTTTAAATAGACCAGTAACCCTGTGAGCTTTAGGTTTTGTATTTTTATTT  
ACAGTAGGAGGATTAACAGGGGTAATTTTAGCTAATTCTTCAATTGATATTATTCT  
TCACGATACTTACTATGTAGTAGCTCATTTTCACTATGTTCTTTCTATAGGAGCTG  
TATTTGCAATTATAGCCGGAATTGTCCAATGATTCCCATTATTTACCGGACTAAC  
CTTAAATAATTTTTTTTTTAAAAACCCAATTTATTACTATATTTTTAGGTGTAAATTTA  
ACATTTTTTCCCCAACACTTTTTAGGGCTAAGAGGAATGCCTCGGCGATATTCGG  
ATTATCCAGATGCTTTCCTACTATCTGAAATGCCATTTTCATCTATTGGTTCCATTATT  
TCTCTCACAAGAATTATCTTTTTTTTATTTATCTTATGAGAAAGGCTTTCTTCCCAA  
CGTAAATCTTTGAGAACTTTAAATGTAACAACCTTCAATTGAATGGTTACAAGCCCT  
ACCCCCTAGTG

HEV2

ATTATTAGACAAGAAAGGGGGGAAAAAAGAAGCTTTTGGAACCTTAGGAATAATTT  
ATGCCATGATAGCTATCGGATTATTAGGATTCGTAGTTTGAGCTCACCATATATT  
TACAGTAGGGATAGATGTAGATACCCGAGCTTACTTCACTTCAGCAACTATAATT  
ATCGCGGTTCCAACCTGGGATTAAGTCTTTAGGTGACTAGCCACCTTTTCATGGA  
ACTCAAATTTTAAATAGACCAGTAACCCTGTGAGCTTTAGGTTTTGTATTTTTATT  
TACAGTAGGAGGATTAACAGGGGTAATTTAGCTAATTCTTCAATTGATATTATTC  
TTCACGATACTTACTATGTAGTAGCTCATTTTCACTATGTTCTTTCTATAGGAGCT  
GTATTTGCAATTATAGCCGGAATTGTCCAATGATTCCCATTATTTACTGGACTAA  
CCTTAAATAATTTTTTTTTTAAAAACCCAATTTATTACTATATTTTTAGGTGTAAATTT  
AACATTTTTTCTCAACACTTTTTAGGGCTAAGAGGAATGCCTCGGCGATATTCG  
GATTATCCAGATGCTTTCCTACTATCTGAAATGCCATTTTCATCTATTGGTTCCATTAT  
TTCTCTCACAAGAATTATCTTTTTTTTATTTATCTTATGAGAAAGGCTTTCTTCCCAA  
ACGTAATCTTTGAGAACTTTAAATGTAACAACCTTCAATTGAATGGTTACAAGCC  
CTACCCCCTAGTG

HEV2\_2

ATTATTAGACAAGAAAGGGGGGAAAAAAGAAGCTTTTGGAACCTTAGGAATAATTT

ATGCCATGATAGCTATCGGATTATTAGGATTCGTAGTTTGAGCTCACCATATATT  
TACAGTAGGGATAGATGTAGATACCCGAGCTTACTTCACTTCAGCAACTATAATT  
ATCGCGGTTCCAACCTGGGATTAAGTCTTTAGGTGACTAGCCACCTTTCATGGA  
ACTCAAATTTTAAATAGACCAGTAACCCTGTGAGCTTTAGGTTTTGTATTTTTATT  
TACAGTAGGAGGATTAACAGGGGTAATTTTAGCTAATTCTTCAATTGATATTATTC  
TTCACGATACTTACTATGTAGTAGCTCATTTTCACTATGTTCTTTCTATAGGAGCT  
GTATTTGCAATTATAGCCGGAATTGTCCAATGATTCCCATTATTTACTGGACTAA  
CCTTAAATAATTTTTTTTTTAAAAACCCAATTTATTACTATATTTTTTAGGTGTAAATTT  
AACATTTTTTCTCAACACTTTTTAGGGCTAAGAGGAATGCCTCGGCGATATTCG  
GATTATCCAGATGCTTTCCTATCTGAAATGCCATTTTCACTATTGGTTCCATTAT  
TTCTCTCACAAGAATTATCTTTTTTTTTATTTATCTTATGAGAAAGGCTTTCTTCCCA  
ACGTAATCTTTGAGAACTTTAAATGTAACAACCTTCAATTGAATGGTTACAAGCC  
CTACCCCTAGTG

JAB2

ATTATTAGACAAGAAAGGGGGGAAAAAAGAAGCTTTTGGAACCTTAGGAATAATTT  
ATGCCATGATAGCTATCGGATTATTAGGATTCGTAGTTTGAGCTCACCATATATT  
TACAGTAGGGATAGATGTAGATACCCGAGCTTACTTCACTTCAGCAACTATAATT  
ATTGCGGTTCCAACCTGGGATTAAGTCTTTAGATGACTAGCCACCTTTCATGGAA  
CTCAAATTTTAAATAGACCAGTAACCCTGTGAGCTTTAGGTTTTGTATTTTTATTT  
ACAGTAGGAGGATTAACAGGGGTAATTTTAGCTAATTCTTCAATTGATATTATTCT  
TCACGATACTTACTATGTAGTAGCTCATTTTCACTATGTTCTTTCTATAGGAGCTG  
TATTTGCAATTATAGCCGGAATTGTCCAATGATTCCCATTATTTACCGGACTAAC  
CTTAAATAATTTTTTTTTTAAAAACCCAATTTATTACTATATTTTTTAGGTGTAAATTTA  
ACATTTTTTCCCAACACTTTTTAGGGCTAAGAGGAATGCCTCGGCGATATTCGG  
ATTATCCAGATGCTTTCCTATCTGAAATGCCATTTTCACTATTGGTTCCATTATT  
TCTCTCACAAGAATTATCTTTTTTTTTATTTATCTTATGAGAAAGGCTTTCTTCCCAA  
CGTAAATCTTTGAGAACTTTAAATGTAACAACCTTCAATTGAATGGTTACAAGCCCT  
ACCCCTAGTG

JAB4

ATTATTAGACAAGAAAGGGGGGAAAAAAGAAGCTTTTGGAACCTTAGGAATAATTT  
ATGCCATGATAGCTATCGGATTATTAGGATTCGTAGTTTGAGCTCACCATATATT  
TACAGTAGGGATAGATGTAGATACCCGAGCTTACTTCACTTCAGCAACTATAATT  
ATTGCGGTTCCAACCTGGGATTAAGTCTTTAGATGACTAGCCACCTTTCATGGAA  
CTCAAATTTTAAATAGACCAGTAACCCTGTGAGCTTTAGGTTTTGTATTTTTATTT  
ACAGTAGGAGGATTAACAGGGGTAATTTTAGCTAATTCTTCAATTGATATTATTCT  
TCACGATACTTACTATGTAGTAGCTCATTTTCACTATGTTCTTTCTATAGGAGCTG  
TATTTGCAATTATAGCCGGAATTGTCCAATGATTCCCATTATTTACCGGACTAAC  
CTTAAATAATTTTTTTTTTAAAAACCCAATTTATTACTATATTTTTTAGGTGTAAATTTA  
ACATTTTTTCCCAACACTTTTTAGGGCTAAGAGGAATGCCTCGGCGATATTCGG  
ATTATCCAGATGCTTTCCTATCTGAAATGCCATTTTCACTATTGGTTCCATTATT  
TCTCTCACAAGAATTATCTTTTTTTTTATTTATCTTATGAGAAAGGCTTTCTTCCCAA  
CGTAAATCTTTGAGAACTTTAAATGTAACAACCTTCAATTGAATGGTTACAAGCCCT  
ACCCCTAGTG

LAV1

ATTATTAGACAAGAAAGGGGGGAAAAAAGAAGCTTTTGGAACCTTAGGAATAATTT  
ATGCCATGATAGCTATCGGATTATTAGGATTCGTAGTTTGAGCTCACCATATATT  
TACAGTAGGGATAGATGTAGATACCCGAGCTTACTTCACTTCAGCAACTATAATT  
ATTGCGGTTCCAACCTGGGATTAAGTCTTTAGATGACTAGCCACCTTTCATGGAA  
CTCAAATTTTAAATAGACCAGTAACCCTGTGAGCTTTAGGTTTTGTATTTTTATTT  
ACAGTAGGAGGATTAACAGGGGTAATTTTAGCTAATTCTTCAATTGATATTATTCT

TCACGATACTTACTATGTAGTAGCTCATTTTCACTATGTTCTTTCTATAGGAGCTG  
TATTTGCAATTATAGCCGGAATTGTCCAATGATTCCCATTATTTACCGGACTAAC  
CTTAAATAATTTTTTTTTTAAAAACCCAATTTACTATATTTTTAGGTGTAAATTTA  
ACATTTTTTCCCAACACTTTTTAGGGCTAAGAGGAATGCCTCGGCGATATTCGG  
ATTATCCAGATGCTTTCCTACTATCTGAAATGCCATTTTCATCTATTGGTTCCATTATT  
TCTCTACAAGAATTATCTTTTTTTTTATTTATCTTATGAGAAAGGCTTTCTTCCCAA  
CGTAAATCTTTGAGAACTTTAAATGTAACAACCTTCAATTGAATGGTTACAAGCCCT  
ACCCCTAGTG

LAV2

ATTATTAGACAAGAAAGGGGGGAAAAAGAAGCTTTTGGAACCTTAGGAATAATTT  
ATGCCATGATAGCTATCGGATTATTAGGATTCGTAGTTTGAGCTCACCATATATT  
TACAGTAGGGATAGATGTAGATACCCGAGCTTACTTCACTTCAGCAACTATAATT  
ATTGCGGTTCCAACCTGGGATTAAAGTCTTTAGATGACTAGCCACCTTTCATGGAA  
CTCAAATTTTTAAATAGACCAGTAACCCTGTGAGCTTTAGGTTTTGTATTTTTATTT  
ACAGTAGGAGGATTAACAGGGGTAATTTTAGCTAATTCTTCAATTGATATTATTCT  
TCACGATACTTACTATGTAGTAGCTCATTTTCACTATGTTCTTTCTATAGGAGCTG  
TATTTGCAATTATAGCCGGAATTGTTCAATGATTCCCATTATTTACCGGACTAAC  
TTAAATAATTTTTTTTTTAAAAACCCAATTTACTATATTTTTAGGTGTAAATTTAA  
CATTTTTTCCCAACACTTTTTAGGGCTAAGAGGAATGCCTCGGCGATATTCGGA  
TTATCCAGATGCTTTCCTACTATCTGAAATGCCATTTTCATCTATTGGTTCCATTATT  
CTCTACAAGAATTATCTTTTTTTTTATTTATCTTATGAGAAAGGCTTTCTTCCCAA  
CGTAAATCTTTGAGAACTTTAAATGTAACAACCTTCAATTGAATGGTTACAAGCCCT  
ACCCCTAGTG

MAC2

ATTATTAGACAAGAAAGGGGGGAAAAAGAAGCTTTTGGAACCTTAGGAATAATTT  
ATGCCATGATAGCTATCGGATTATTAGGATTCGTAGTTTGAGCTCACCATATATT  
TACAGTAGGGATAGATGTAGATACCCGAGCTTACTTCACTTCAGCAACTATAATT  
ATTGCGGTTCCAACCTGGGATTAAAGTCTTTAGATGACTAGCCACCTTTCATGGAA  
CTCAAATTTTTAAATAGACCAGTAACCCTGTGAGCTTTAGGTTTTGTATTTTTATTT  
ACAGTAGGAGGATTAACAGGGGTAATTTTAGCTAATTCTTCAATTGATATTATTCT  
TCACGATACTTACTATGTAGTAGCTCATTTTCACTATGTTCTTTCTATAGGAGCTG  
TATTTGCAATTATAGCCGGAATTGTCCAATGATTCCCATTATTTACCGGACTAAC  
CTTAAATAATTTTTTTTTTAAAAACCCAATTTACTATATTTTTAGGTGTAAATTTA  
ACATTTTTTCCCAACACTTTTTAGGGCTAAGAGGAATGCCTCGGCGATATTCGG  
ATTATCCAGATGCTTTCCTACTATCTGAAATGCCATTTTCATCTATTGGTTCCATTATT  
TCTCTACAAGAATTATCTTTTTTTTTATTTATCTTATGAGAAAGGCTTTCTTCCCAA  
CGTAAATCTTTGAGAACTTTAAATGTAACAACCTTCAATTGAATGGTTACAAGCCCT  
ACCCCTAGTG

MAC4

ATTATTAGACAAGAAAGGGGGGAAAAAGAAGCTTTTGGAACCTTAGGAATAATTT  
ATGCCATGATAGCTATCGGATTATTAGGATTCGTAGTTTGAGCTCACCATATATT  
TACAGTAGGGATAGATGTAGATACCCGAGCTTACTTCACTTCAGCAACTATAATT  
ATTGCGGTTCCAACCTGGGATTAAAGTCTTTAGATGACTAGCCACCTTTCATGGAA  
CTCAAATTTTTAAATAGACCAGTAACCCTGTGAGCTTTAGGTTTTGTATTTTTATTT  
ACAGTAGGAGGATTAACAGGGGTAATTTTAGCTAATTCTTCAATTGATATTATTCT  
TCACGATACTTACTATGTAGTAGCTCATTTTCACTATGTTCTTTCTATAGGAGCTG  
TATTTGCAATTATAGCCGGAATTGTCCAATGATTCCCATTATTTACCGGACTAAC  
CTTAAATAATTTTTTTTTTAAAAACCCAATTTACTATATTTTTAGGTGTAAATTTA  
ACATTTTTTCCCAACACTTTTTAGGGCTAAGAGGAATGCCTCGGCGATATTCGG  
ATTATCCAGATGCTTTCCTACTATCTGAAATGCCATTTTCATCTATTGGTTCCATTATT

TCTCTCACAAGAATTATCTTTTTTTTTATTTATCTTATGAGAAAGGCTTTCTTCCCAA  
CGTAAATCTTTGAGAACTTTAAATGTAACAACCTTCAATTGAATGGTTACAAGCCCT  
ACCCCCTAGTG

MAC6

ATTATTAGACAAGAAAGGGGGGAAAAAAGAAGCTTTTGGAACCTTAGGAATAATTT  
ATGCCATGATAGCTATCGGATTATTAGGATTCGTAGTTTGAGCTCACCATATATT  
TACAGTAGGGATAGATGTAGATACCCGAGCTTACTTCACTTCAGCAACTATAATT  
ATTGCGGTTCCAACCTGGGATTAAGTCTTTAGATGACTAGCCACCTTTTCATGGAA  
CTCAAATTTTAAATAGACCAGTAACCCTGTGAGCTTTAGGTTTTGTATTTTTATTT  
ACAGTAGGAGGATTAACAGGGGTAATTTTAGCTAATTCTTCAATTGATATTATTCT  
TCACGATACTTACTATGTAGTAGCTCATTTTCACTATGTTCTTTCTATAGGAGCTG  
TATTTGCAATTATAGCCGGAATTGTCCAATGATTCCCATTATTTACCGGACTAAC  
CTTAAATAATTTTTTTTTTAAAAACCCAATTTATTACTATATTTTTAGGTGTAAATTTA  
ACATTTTTTCCCAACACTTTTTAGGGCTAAGAGGAATGCCTCGGCGATATTCGG  
ATTATCCAGATGCTTTCCTACTATCTGAAATGCCATTTTCATCTATTGGTTCCATTATT  
TCTCTCACAAGAATTATCTTTTTTTTTATTTATCTTATGAGAAAGGCTTTCTTCCCAA  
CGTAAATCTTTGAGAACTTTAAATGTAACAACCTTCAATTGAATGGTTACAAGCCCT  
ACCCCCTAGTG

MAR2\_1

ATTATTAGACAAGAAAGGGGGGAAAAAAGAAGCTTTTGGAACCTTAGGAATAATTT  
ATGCCATGATAGCTATCGGATTATTAGGATTCGTAGTTTGAGCTCACCATATATT  
TACAGTAGGGATAGATGTAGATACCCGAGCTTACTTCACTTCAGCAACTATAATT  
ATTGCGGTTCCAACCTGGGATTAAGTCTTTAGATGACTAGCCACCTTTTCATGGAA  
CTCAAATTTTAAATAGACCAGTAACCCTGTGAGCTTTAGGTTTTGTATTTTTATTT  
ACAGTAGGAGGATTAACAGGGGTAATTTTAGCTAATTCTTCAATTGATATTATTCT  
TCACGATACTTACTATGTAGTAGCTCATTTTCACTATGTTCTTTCTATAGGAGCTG  
TATTTGCAATTATAGCCGGAATTGTCCAATGATTCCCATTATTTACCGGACTAAC  
CTTAAATAATTTTTTTTTTAAAAACCCAATTTATTACTATATTTTTAGGTGTAAATTTA  
ACATTTTTTCCCAACACTTTTTAGGGCTAAGAGGAATGCCTCGGCGATATTCGG  
ATTATCCAGATGCTTTCCTACTATCTGAAATGCCATTTTCATCTATTGGTTCCATTATT  
TCTCTCACAAGAATTATCTTTTTTTTTATTTATCTTATGAGAAAGGCTTTCTTCCCAA  
CGTAAATCTTTGAGAACTTTAAATGTAACAACCTTCAATTGAATGGTTACAAGCCCT  
ACCCCCTAGTG

MAR2\_2

ATTATTAGACAAGAAAGGGGGGAAAAAAGAAGCTTTTGGAACCTTAGGAATAATTT  
ATGCCATGATAGCTATCGGATTATTAGGATTCGTAGTTTGAGCTCACCATATATT  
TACAGTAGGGATAGATGTAGATACCCGAGCTTACTTCACTTCAGCAACTATAATT  
ATTGCGGTTCCAACCTGGGATTAAGTCTTTAGATGACTAGCCACCTTTTCATGGAA  
CTCAAATTTTAAATAGACCAGTAACCCTGTGAGCTTTAGGTTTTGTATTTTTATTT  
ACAGTAGGAGGATTAACAGGGGTAATTTTAGCTAATTCTTCAATTGATATTATTCT  
TCACGATACTTACTATGTAGTAGCTCATTTTCACTATGTTCTTTCTATAGGAGCTG  
TATTTGCAATTATAGCCGGAATTGTCCAATGATTCCCATTATTTACCGGACTAAC  
CTTAAATAATTTTTTTTTTAAAAACCCAATTTATTACTATATTTTTAGGTGTAAATTTA  
ACATTTTTTCCCAACACTTTTTAGGGCTAAGAGGAATGCCTCGGCGATATTCGG  
ATTATCCAGATGCTTTCCTACTATCTGAAATGCCATTTTCATCTATTGGTTCCATTATT  
TCTCTCACAAGAATTATCTTTTTTTTTATTTATCTTATGAGAAAGGCTTTCTTCCCAA  
CGTAAATCTTTGAGAACTTTAAATGTAACAACCTTCAATTGAATGGTTACAAGCCCT  
ACCCCCTAGTG

MAR3\_1

ATTATTAGACAAGAAAGGGGGGAAAAAAGAAGCTTTTGGAACCTTAGGAATAATTT

ATGCCATGATAGCTATCGGATTATTAGGATTCGTAGTTTGAGCTCACCATATATT  
TACAGTAGGGATAGATGTAGATACCCGAGCTTACTTCACTTCAGCAACTATAATT  
ATTGCGGTTCCAACCTGGGATTAAGTCTTTAGATGACTAGCCACCTTTCATGGAA  
CTCAAATTTTAAATAGACCAGTAACCCTGTGAGCTTTAGGTTTTGTATTTTTATTT  
ACAGTAGGAGGATTAACAGGGGTAATTTTAGCTAATTCTTCAATTGATATTATTCT  
TCACGATACTTACTATGTAGTAGCTCATTTCCTTCTTCTATAGGAGCTG  
TATTTGCAATTATAGCCGGAATTGTCCAATGATTCCCATTATTTACCGGACTAAC  
CTTAAATAATTTTTTTTTTAAAAACCCAATTTATTACTATATTTTTTAGGTGTAAATTTA  
ACATTTTTTCCCAACACTTTTTAGGGCTAAGAGGAATGCCTCGGCGATATTCGG  
ATTATCCAGATGCTTTCCTATCTGAAATGCCATTTTCATCTATTGGTTCCATTATT  
TCTCTCACAAGAATTATCTTTTTTTTTATTTATCTTATGAGAAAGGCTTTCTTCCCAA  
CGTAAATCTTTGAGAACTTTAAATGTAACAACCTTCAATTGAATGGTTACAAGCCCT  
ACCCCTAGTG

MAR3\_2

ATTATTAGACAAGAAAGGGGGGAAAAAAGAAGCTTTTGGAACCTTAGGAATAATTT  
ATGCCATGATAGCTATCGGATTATTAGGATTCGTAGTTTGAGCTCACCATATATT  
TACAGTAGGGATAGATGTAGATACCCGAGCTTACTTCACTTCAGCAACTATAATT  
ATTGCGGTTCCAACCTGGGATTAAGTCTTTAGATGACTAGCCACCTTTCATGGAA  
CTCAAATTTTAAATAGACCAGTAACCCTGTGAGCTTTAGGTTTTGTATTTTTATTT  
ACAGTAGGAGGATTAACAGGGGTAATTTTAGCTAATTCTTCAATTGATATTATTCT  
TCACGATACTTACTATGTAGTAGCTCATTTCCTTCTTCTATAGGAGCTG  
TATTTGCAATTATAGCCGGAATTGTCCAATGATTCCCATTATTTACCGGACTAAC  
CTTAAATAATTTTTTTTTTAAAAACCCAATTTATTACTATATTTTTTAGGTGTAAATTTA  
ACATTTTTTCCCAACACTTTTTAGGGCTAAGAGGAATGCCTCGGCGATATTCGG  
ATTATCCAGATGCTTTCCTATCTGAAATGCCATTTTCATCTATTGGTTCCATTATT  
TCTCTCACAAGAATTATCTTTTTTTTTATTTATCTTATGAGAAAGGCTTTCTTCCCAA  
CGTAAATCTTTGAGAACTTTAAATGTAACAACCTTCAATTGAATGGTTACAAGCCCT  
ACCCCTAGTG

MOC1

ATTATTAGACAAGAAAGGGGGGAAAAAAGAAGCTTTTGGAACCTTAGGAATAATTT  
ATGCCATGATAGCTATCGGATTATTAGGATTCGTAGTTTGAGCTCACCATATATT  
TACAGTAGGGATAGATGTAGATACCCGAGCTTACTTCACTTCAGCAACTATAATT  
ATTGCGGTTCCAACCTGGGATTAAGTCTTTAGATGACTAGCCACCTTTCATGGAA  
CTCAAATTTTAAATAGACCAGTAACCCTGTGAGCTTTAGGTTTTGTATTTTTATTT  
ACAGTAGGAGGATTAACAGGGGTAATTTTAGCTAATTCTTCAATTGATATTATTCT  
TCACGATACTTACTATGTAGTAGCTCATTTCCTTCTTCTATAGGAGCTG  
TATTTGCAATTATAGCCGGAATTGTCCAATGATTCCCATTATTTACCGGACTAAC  
CTTAAATAATTTTTTTTTTAAAAACCCAATTTATTACTATATTTTTTAGGTGTAAATTTA  
ACATTTTTTCCCAACACTTTTTAGGGCTAAGAGGAATGCCTCGGCGATATTCGG  
ATTATCCAGATGCTTTCCTATCTGAAATGCCATTTTCATCTATTGGTTCCATTATT  
TCTCTCACAAGAATTATCTTTTTTTTTATTTATCTTATGAGAAAGGCTTTCTTCCCAA  
CGTAAATCTTTGAGAACTTTAAATGTAACAACCTTCAATTGAATGGTTACAAGCCCT  
ACCCCTAGTG

MOC2

ATTATTAGACAAGAAAGGGGGGAAAAAAGAAGCTTTTGGAACCTTAGGAATAATTT  
ATGCCATGATAGCTATCGGATTATTAGGATTCGTAGTTTGAGCTCACCATATATT  
TACAGTAGGGATAGATGTAGATACCCGAGCTTACTTCACTTCAGCAACTATAATT  
ATTGCGGTTCCAACCTGGGATTAAGTCTTTAGATGACTAGCCACCTTTCATGGAA  
CTCAAATTTTAAATAGACCAGTAACCCTGTGAGCTTTAGGTTTTGTATTTTTATTT  
ACAGTAGGAGGATTAACAGGGGTAATTTTAGCTAATTCTTCAATTGATATTATTCT

TCACGATACTTACTATGTAGTAGCTCATTTTTCACTATGTTCTTTCTATAGGAGCTG  
TATTTGCAATTATAGCCGGAATTGTCCAATGATTCCCATTATTTACCGGACTAAC  
CTTAAATAATTTTTTTTTAAAAACCCAATTTACTATATTTTTAGGTGTAAATTTA  
ACATTTTTTCCCAACACTTTTTAGGGCTAAGAGGAATGCCTCGGCGATATTCGG  
ATTATCCAGATGCTTTCCTACTATCTGAAATGCCATTTTCATCTATTGGTTCCATTATT  
TCTCTACAAGAATTATCTTTTTTTTTATTTATCTTATGAGAAAGGCTTTCTTCCCAA  
CGTAAATCTTTGAGAACTTTAAATGTAACAACCTTCAATTGAATGGTTACAAGCCCT  
ACCCCCTAGTG

MOC2\_0

ATTATTAGACAAGAAAGGGGGAAAAAAGAAGCTTTTGGAACCTTAGGAATAATTT  
ATGCCATGATAGCTATCGGATTATTAGGATTCGTAGTTTGAGCTCACCATATATT  
TACAGTAGGGATAGATGTAGATACCCGAGCTTACTTCACTTCAGCAACTATAATT  
ATTGCGGTTCCAACCTGGGATTAAGTCTTTAGATGACTAGCCACCTTTCATGGAA  
CTCAAATTTTAAATAGACCAGTAACCCTGTGAGCTTTAGGTTTTGTATTTTTATTT  
ACAGTAGGAGGATTAACAGGGGTAATTTTAGCTAATTCTTCAATTGATATTATTCT  
TCACGATACTTACTATGTAGTAGCTCATTTTTCACTATGTTCTTTCTATAGGAGCTG  
TATTTGCAATTATAGCCGGAATTGTCCAATGATTCCCATTATTTACCGGACTAAC  
CTTAAATAATTTTTTTTTAAAAACCCAATTTACTATATTTTTAGGTGTAAATTTA  
ACATTTTTTCCCAACACTTTTTAGGGCTAAGAGGAATGCCTCGGCGATATTCGG  
ATTATCCAGATGCTTTCCTACTATCTGAAATGCCATTTTCATCTATTGGTTCCATTATT  
TCTCTACAAGAATTATCTTTTTTTTTATTTATCTTATGAGAAAGGCTTTCTTCCCAA  
CGTAAATCTTTGAGAACTTTAAATGTAACAACCTTCAATTGAATGGTTACAAGCCCT  
ACCCCCTAGTG

MOC2\_1

ATTATTAGACAAGAAAGGGGGAAAAAAGAAGCTTTTGGAACCTTAGGAATAATTT  
ATGCCATGATAGCTATCGGATTATTAGGATTCGTAGTTTGAGCTCACCATATATT  
TACAGTAGGGATAGATGTAGATACCCGAGCTTACTTCACTTCAGCAACTATAATT  
ATTGCGGTTCCAACCTGGGATTAAGTCTTTAGATGACTAGCCACCTTTCATGGAA  
CTCAAATTTTAAATAGACCAGTAACCCTGTGAGCTTTAGGTTTTGTATTTTTATTT  
ACAGTAGGAGGATTAACAGGGGTAATTTTAGCTAATTCTTCAATTGATATTATTCT  
TCACGATACTTACTATGTAGTAGCTCATTTTTCACTATGTTCTTTCTATAGGAGCTG  
TATTTGCAATTATAGCCGGAATTGTCCAATGATTCCCATTATTTACCGGACTAAC  
CTTAAATAATTTTTTTTTAAAAACCCAATTTACTATATTTTTAGGTGTAAATTTA  
ACATTTTTTCCCAACACTTTTTAGGGCTAAGAGGAATGCCTCGGCGATATTCGG  
ATTATCCAGATGCTTTCCTACTATCTGAAATGCCATTTTCATCTATTGGTTCCATTATT  
TCTCTACAAGAATTATCTTTTTTTTTATTTATCTTATGAGAAAGGCTTTCTTCCCAA  
CGTAAATCTTTGAGAACTTTAAATGTAACAACCTTCAATTGAATGGTTACAAGCCCT  
ACCCCCTAGTG

MOC3

ATTATTAGACAAGAAAGGGGGAAAAAAGAAGCTTTTGGAACCTTAGGAATAATTT  
ATGCCATGATAGCTATCGGATTATTAGGATTCGTAGTTTGAGCTCACCATATATT  
TACAGTAGGGATAGATGTAGATACCCGAGCTTACTTCACTTCAGCAACTATAATT  
ATTGCGGTTCCAACCTGGGATTAAGTCTTTAGATGACTAGCCACCTTTCATGGAA  
CTCAAATTTTAAATAGACCAGTAACCCTGTGAGCTTTAGGTTTTGTATTTTTATTT  
ACAGTAGGAGGATTAACAGGGGTAATTTTAGCTAATTCTTCAATTGATATTATTCT  
TCACGATACTTACTATGTAGTAGCTCATTTTTCACTATGTTCTTTCTATAGGAGCTG  
TATTTGCAATTATAGCCGGAATTGTCCAATGATTCCCATTATTTACCGGACTAAC  
CTTAAATAATTTTTTTTTAAAAACCCAATTTACTATATTTTTAGGTGTAAATTTA  
ACATTTTTTCCCAACACTTTTTAGGGCTAAGAGGAATGCCTCGGCGATATTCGG  
ATTATCCAGATGCTTTCCTACTATCTGAAATGCCATTTTCATCTATTGGTTCCATTATT

TCTCTCACAGAATTATCTTTTTTTTATTTATCTTATGAGAAAGGCTTTCTTCCCAA  
CGTAAATCTTTGAGAACTTTAAATGTAACAACCTTCAATTGAATGGTTACAAGCCCT  
ACCCCCTAGTG

MOC4

ATTATTAGACAAGAAAGGGGGGAAAAAAGAAGCTTTTGGAACCTTAGGAATAATTT  
ATGCCATGATAGCTATCGGATTATTAGGATTCGTAGTTTGAGCTCACCATATATT  
TACAGTAGGGATAGATGTAGATACCCGAGCTTACTTCACTTCAGCAACTATAATT  
ATTGCGGTTCCAACCTGGGATTAAGTCTTTAGATGACTAGCCACCTTTTCATGGAA  
CTCAAATTTTAAATAGACCAGTAACCCTGTGAGCTTTAGGTTTTGTATTTTTATTT  
ACAGTAGGAGGATTAACAGGGGTAATTTTAGCTAATTCTTCAATTGATATTATTCT  
TCACGATACTTACTATGTAGTAGCTCATTTTCACTATGTTCTTTCTATAGGAGCTG  
TATTTGCAATTATAGCCGGAATTGTCCAATGATTCCCATTATTTACCGGACTAAC  
CTTAAATAATTTTTTTTTTAAAAACCCAATTTATTACTATATTTTTAGGTGTAAATTTA  
ACATTTTTTCCCAACACTTTTTAGGGCTAAGAGGAATGCCTCGGCGATATTCGG  
ATTATCCAGATGCTTTCCTACTATCTGAAATGCCATTTTCATCTATTGGTTCCATTATT  
TCTCTCACAGAATTATCTTTTTTTTATTTATCTTATGAGAAAGGCTTTCTTCCCAA  
CGTAAATCTTTGAGAACTTTAAATGTAACAACCTTCAATTGAATGGTTACAAGCCCT  
ACCCCCTAGTG

moc5

ATTATTAGACAAGAAAGGGGGGAAAAAAGAAGCTTTTGGAACCTTAGGAATAATTT  
ATGCCATGATAGCTATCGGATTATTAGGATTCGTAGTTTGAGCTCACCATATATT  
TACAGTAGGGATAGATGTAGATACCCGAGCTTACTTCACTTCAGCAACTATAATT  
ATTGCGGTTCCAACCTGGGATTAAGTCTTTAGATGACTAGCCACCTTTTCATGGAA  
CTCAAATTTTAAATAGACCAGTAACCCTGTGAGCTTTAGGTTTTGTATTTTTATTT  
ACAGTAGGAGGATTAACAGGGGTAATTTTAGCTAATTCTTCAATTGATATTATTCT  
TCACGATACTTACTATGTAGTAGCTCATTTTCACTATGTTCTTTCTATAGGAGCTG  
TATTTGCAATTATAGCCGGAATTGTCCAATGATTCCCATTATTTACCGGACTAAC  
CTTAAATAATTTTTTTTTTAAAAACCCAATTTATTACTATATTTTTAGGTGTAAATTTA  
ACATTTTTTCCCAACACTTTTTAGGGCTAAGAGGAATGCCTCGGCGATATTCGG  
ATTATCCAGATGCTTTCCTACTATCTGAAATGCCATTTTCATCTATTGGTTCCATTATT  
TCTCTCACAGAATTATCTTTTTTTTATTTATCTTATGAGAAAGGCTTTCTTCCCAA  
CGTAAATCTTTGAGAACTTTAAATGTAACAACCTTCAATTGAATGGTTACAAGCCCT  
ACCCCCTAGTG

pit1

ATTATTAGACAAGAAAGGGGGGAAAAAAGAAGCTTTTGGAACCTTAGGAATAATTT  
ATGCCATGATAGCTATCGGATTATTAGGATTCGTAGTTTGAGCTCACCATATATT  
TACAGTAGGGATAGATGTAGATACCCGAGCTTACTTCACTTCAGCAACTATAATT  
ATCGCGGTTCCAACCTGGGATTAAGTCTTTAGGTGACTAGCCACCTTTTCATGGA  
ACTCAAATTTTAAATAGACCAGTAACCCTGTGAGCTTTAGGTTTTGTATTTTTATT  
TACAGTAGGAGGATTAACAGGGGTAATTTAGCTAATTCTTCAATTGATATTATTC  
TTCACGATACTTACTATGTAGTAGCTCATTTTCACTATGTTCTTTCTATAGGAGCT  
GTATTTGCAATTATAGCCGGAATTGTCCAATGATTCCCATTATTTACTGGACTAA  
CCTTAAATAATTTTTTTTTTAAAAACCCAATTTATTACTATATTTTTAGGTGTAAATTT  
AACATTTTTTCTCAACACTTTTTAGGGCTAAGAGGAATGCCTCGGCGATATTCG  
GATTATCCAGATGCTTTCCTACTATCTGAAATGCCATTTTCATCTATTGGTTCCATTAT  
TTCTCTCACAGAATTATCTTTTTTTTATTTATCTTATGAGAAAGGCTTTCTTCCCAA  
ACGTAATCTTTGAGAACTTTAAATGTAACAACCTTCAATTGAATGGTTACAAGCC  
CTACCCCCTAGTG

PIT1\_1

ATTATTAGACAAGAAAGGGGGGAAAAAAGAAGCTTTTGGAACCTTAGGAATAATTT



ATGCCATGATAGCTATCGGATTATTAGGATTCGTAGTTTGAGCTCACCATATATT  
TACAGTAGGGATAGATGTAGATACCCGAGCTTACTTCACTTCAGCAACTATAATT  
ATCGCGGTTCCAACCTGGGATTAAGTCTTTAGGTGACTAGCCACCTTTCATGGA  
ACTCAAATTTTAAATAGACCAGTAACCCTGTGAGCTTTAGGTTTTGTATTTTTATT  
TACAGTAGGAGGATTAACAGGGGTAATTTTAGCTAATTCTTCAATTGATATTATTC  
TTCACGATACTTACTATGTAGTAGCTCATTTTTCACTATGTTCTTTCTATAGGAGCT  
GTATTTGCAATTATAGCCGGAATTGTCCAATGATTCCCATTATTTACTGGACTAA  
CCTTAAATAATTTTTTTTTTAAAAACCCAATTTATTACTATATTTTTTAGGTGTAAATTT  
AACATTTTTTCCTCAACACTTTTTAGGGCTAAGAGGAATGCCTCGGCGATATTCG  
GATTATCCAGATGCTTTCCTATCTGAAATGCCATTTTCATCTATTGGTTCCATTAT  
TTCTCTCACAAGAATTATCTTTTTTTTTATTTATCTTATGAGAAAGGCTTTCTTCCCA  
ACGTAATCTTTGAGAACTTTAAATGTAACAACCTTCAATTGAATGGTTACAAGCC  
CTACCCCTAGTG

PIT1\_2

ATTATTAGACAAGAAAGGGGGGAAAAAAGAAGCTTTTGGAACCTTAGGAATAATTT  
ATGCCATGATAGCTATCGGATTATTAGGATTCGTAGTTTGAGCTCACCATATATT  
TACAGTAGGGATAGATGTAGATACCCGAGCTTACTTCACTTCAGCAACTATAATT  
ATTGCGGTTCCAACCTGGGATTAAGTCTTTAGATGACTAGCCACCTTTCATGGAA  
CTCAAATTTTAAATAGACCAGTAACCCTGTGAGCTTTAGGTTTTGTATTTTTATTT  
ACAGTAGGAGGATTAACAGGGGTAATTTTAGCTAATTCTTCAATTGATATTATTCT  
TCACGATACTTACTATGTAGTAGCTCATTTTTCACTATGTTCTTTCTATAGGAGCTG  
TATTTGCAATTATAGCCGGAATTGTCCAATGATTCCCATTATTTACTGGACTAACC  
TTAAATAATTTTTTTTTTAAAAACCCAATTTATTACTATATTTTTTAGGTGTAAATTTAA  
CATTTTTTCCTCAACACTTTTTAGGGCTAAGAGGAATGCCTCGGCGATATTCGGA  
TTATCCAGATGCTTTCCTATCTGAAATGCCATTTTCATCTATTGGTTCCATTATTT  
CTCTCACAAGAATTATCTTTTTTTTTATTTATCTTATGAGAAAGGCTTTCTTCCCAA  
CGTAAATCTTTGAGAACTTTAAATGTAACAACCTTCAATTGAATGGTTACAAGCCCT  
ACCCCTAGTG

pit2

ATTATTAGACAAGAAAGGGGGGAAAAAAGAAGCTTTTGGAACCTTAGGAATAATTT  
ATGCCATGATAGCTATCGGATTATTAGGATTCGTAGTTTGAGCTCACCATATATT  
TACAGTAAGGATAGATGTAGATACCCGAGCTTACTTCACTTCAGCAACTATAATT  
ATCGCGGTTCCAACCTGGGATTAAGTCTTTAGGTGACTAGCCACCTTTCATGGA  
ACTCAAATTTTAAATAGACCAGTAACCCTGTGAGCTTTAGGTTTTGTATTTTTATT  
TACAGTAGGAGGATTAACAGGGGTAATTTTAGCTAATTCTTCAATTGATATTATTC  
TTCACGATACTTACTATGTAGTAGCTCATTTTTCACTATGTTCTTTCTATAGGAGCT  
GTATTTGCAATTATAGCCGGAATTGTCCAATGATTCCCATTATTTACTGGACTAA  
CCTTAAATAATTTTTTTTTTAAAAACCCAATTTATTACTATATTTTTTAGGTGTAAATTT  
AACATTTTTTCCTCAACACTTTTTAGGGCTAAGAGGAATGCCTCGGCGATATTCG  
GATTATCCAGATGCTTTCCTATCTGAAATGCCATTTTCATCTATTGGTTCCATTAT  
TTCTCTCACAAGAATTATCTTTTTTTTTATTTATCTTATGAGAAAGGCTTTCTTCCCA  
ACGTAATCTTTGAGAACTTTAAATGTAACAACCTTCAATTGAATGGTTACAAGCC  
CTACCCCTAGTG

pit4

ATTATTAGACAAGAAAGGGGGGAAAAAAGAAGCTTTTGGAACCTTAGGAATAATTT  
ATGCCATGATAGCTATCGGATTATTAGGATTCGTAGTTTGAGCTCACCATATATT  
TACAGTAGGGATAGATGTAGATACCCGAGCTTACTTCACTTCAGCAACTATAATT  
ATTGCGGTTCCAACCTGGGATTAAGTCTTTAGATGACTAGCCACCTTTCATGGAA  
CTCAAATTTTAAATAGACCAGTAACCCTGTGAGCTTTAGGTTTTGTATTTTTATTT  
ACAGTAGGAGGATTAACAGGGGTAATTTTAGCTAATTCTTCAATTGATATTATTCT

TCACGATACTTACTATGTAGTAGCTCATTTCCTACTATGTTCTTTCTATAGGAGCTG  
TATTTGCAATTATAGCCGGAATTGTCCAATGATTCCCATTATTTACTGGACTAACC  
TTAAATAATTTTTTTTTTAAAAACCCAATTTATTACTATATTTTTAGGTGTAAATTTAA  
CATTTTTTCTCAACACTTTTTAGGGCTAAGAGGAATGCCTCGGCGATATTCGGA  
TTATCCAGATGCTTTCCTACTATCTGAAATGCCATTTTCATCTATTGGTTCATTATTT  
CTCTCACAAGAATTATCTTTTTTTTTATTTATCTTATGAGAAAGGCTTTCTTCCCAA  
CGTAAATCTTTGAGAACTTTAAATGTAACAACCTTCAATTGAATGGTTACAAGCCCT  
ACCCCTAGTG

RON1

ATTATTAGACAAGAAAGGGGGAAAAAAGAAGCTTTTGGAACCTTAGGAATAATTT  
ATGCCATGATAGCTATCGGATTATTAGGATTCGTAGTTTGAGCTCACCATATATT  
TACAGTAGGGATAGATGTAGATACCCGAGCTTACTTCACTTCAGCAACTATAATT  
ATTGCGGTTCCAACCTGGGATTAAAGTCTTTAGATGACTAGCCACCTTTCATGGAA  
CTCAAATTTTAAATAGACCAGTAACCCTGTGAGCTTTAGGTTTTGTATTTTTATTT  
ACAGTAGGAGGATTAACAGGGGTAATTTTAGCTAATTCTTCAATTGATATTATTCT  
TCACGATACTTACTATGTAGTAGCTCATTTCCTACTATGTTCTTTCTATAGGAGCTG  
TATTTGCAATTATAGCCGGAATTGTCCAATGATTCCCATTATTTACCGGACTAAC  
CTTAAATAATTTTTTTTTTAAAAACCCAATTTATTACTATATTTTTAGGTGTAAATTTA  
ACATTTTTTCCCAACACTTTTTAGGGCTAAGAGGAATGCCTCGGCGATATTCGG  
ATTATCCAGATGCTTTCCTACTATCTGAAATGCCATTTTCATCTATTGGTTCATTATT  
TCTCTCACAAGAATTATCTTTTTTTTTATTTATCTTATGAGAAAGGCTTTCTTCCCAA  
CGTAAATCTTTGAGAACTTTAAATGTAACAACCTTCAATTGAATGGTTACAAGCCCT  
ACCCCTAGTG

RON2

ATTATTAGACAAGAAAGGGGGAAAAAAGAAGCTTTTGGAACCTTAGGAATAATTT  
ATGCCATGATAGCTATCGGATTATTAGGATTCGTAGTTTGAGCTCACCATATATT  
TACAGTAGGGATAGATGTAGATACCCGAGCTTACTTCACTTCAGCAACTATAATT  
ATTGCGGTTCCAACCTGGGATTAAAGTCTTTAGATGACTAGCCACCTTTCATGGAA  
CTCAAATTTTAAATAGACCAGTAACCCTGTGAGCTTTAGGTTTTGTATTTTTATTT  
ACAGTAGGAGGATTAACAGGGGTAATTTTAGCTAATTCTTCAATTGATATTATTCT  
TCACGATACTTACTATGTAGTAGCTCATTTCCTACTATGTTCTTTCTATAGGAGCTG  
TATTTGCAATTATAGCCGGAATTGTCCAATGATTCCCATTATTTACCGGACTAAC  
CTTAAATAATTTTTTTTTTAAAAACCCAATTTATTACTATATTTTTAGGTGTAAATTTA  
ACATTTTTTCCCAACACTTTTTAGGGCTAAGAGGAATGCCTCGGCGATATTCGG  
ATTATCCAGATGCTTTCCTACTATCTGAAATGCCATTTTCATCTATTGGTTCATTATT  
TCTCTCACAAGAATTATCTTTTTTTTTATTTATCTTATGAGAAAGGCTTTCTTCCCAA  
CGTAAATCTTTGAGAACTTTAAATGTAACAACCTTCAATTGAATGGTTACAAGCCCT  
ACCCCTAGTG

ron3

ATTATTAGACAAGAAAGGGGGAAAAAAGAAGCTTTTGGAACCTTAGGAATAATTT  
ATGCCATGATAGCTATCGGATTATTAGGATTCGTAGTTTGAGCTCACCATATATT  
TACAGTAGGGATAGATGTAGATACCCGAGCTTACTTCACTTCAGCAACTATAATT  
ATTGCGGTTCCAACCTGGGATTAAAGTCTTTAGATGACTAGCCACCTTTCATGGAA  
CTCAAATTTTAAATAGACCAGTAACCCTGTGAGCTTTAGGTTTTGTATTTTTATTT  
ACAGTAGGAGGATTAACAGGGGTAATTTTAGCTAATTCTTCAATTGATATTATTCT  
TCACGATACTTACTATGTAGTAGCTCATTTCCTACTATGTTCTTTCTATAGGAGCTG  
TATTTGCAATTATAGCCGGAATTGTCCAATGATTCCCATTATTTACCGGACTAAC  
CTTAAATAATTTTTTTTTTAAAAACCCAATTTATTACTATATTTTTAGGTGTAAATTTA  
ACATTTTTTCCCAACACTTTTTAGGGCTAAGAGGAATGCCTCGGCGATATTCGG  
ATTATCCAGATGCTTTCCTACTATCTGAAATGCCATTTTCATCTATTGGTTCATTATT

TCTCTCACAGAATTATCTTTTTTTTATTTATCTTATGAGAAAGGCTTTCTTCCCAA  
CGTAAATCTTTGAGAACTTTAAATGTAACAACCTTCAATTGAATGGTTACAAGCCCT  
ACCCCCTAGTG

RON4

ATTATTAGACAAGAAAGGGGGAAAAAAGAAGCTTTTGGAACCTTAGGAATAATTT  
ATGCCATGATAGCTATCGGATTATTAGGATTCGTAGTTTGAGCTCACCATATATT  
TACAGTAGGGATAGATGTAGATACCCGAGCTTACTTCACTTCAGCAACTATAATT  
ATTGCGGTTCCAACCTGGGATTAAGTCTTTAGATGACTAGCCACCTTTTCATGGAA  
CTCAAATTTTAAATAGACCAGTAACCCTGTGAGCTTTAGGTTTTGTATTTTTATTT  
ACAGTAGGAGGATTAACAGGGGTAATTTTAGCTAATTCTTCAATTGATATTATTCT  
TCACGATACTTACTATGTAGTAGCTCATTTTCACTATGTTCTTTCTATAGGAGCTG  
TATTTGCAATTATAGCCGGAATTGTCCAATGATTCCCATTATTTACCGGACTAAC  
CTTAAATAATTTTTTTTTTAAAAACCCAATTTATTACTATATTTTTAGGTGTAAATTTA  
ACATTTTTTCCCAACACTTTTTAGGGCTAAGAGGAATGCCTCGGCGATATTCGG  
ATTATCCAGATGCTTTCCTACTATCTGAAATGCCATTTTCATCTATTGGTTCCATTATT  
TCTCTCACAGAATTATCTTTTTTTTATTTATCTTATGAGAAAGGCTTTCTTCCCAA  
CGTAAATCTTTGAGAACTTTAAATGTAACAACCTTCAATTGAATGGTTACAAGCCCT  
ACCCCCTAGTG

RON7

ATTATTAGACAAGAAAGGGGGAAAAAAGAAGCTTTTGGAACCTTAGGAATAATTT  
ATGCCATGATAGCTATCGGATTATTAGGATTCGTAGTTTGAGCTCACCATATATT  
TACAGTAGGGATAGATGTAGATACCCGAGCTTACTTCACTTCAGCAACTATAATT  
ATTGCGGTTCCAACCTGGGATTAAGTCTTTAGATGACTAGCCACCTTTTCATGGAA  
CTCAAATTTTAAATAGACCAGTAACCCTGTGAGCTTTAGGTTTTGTATTTTTATTT  
ACAGTAGGAGGATTAACAGGGGTAATTTTAGCTAATTCTTCAATTGATATTATTCT  
TCACGATACTTACTATGTAGTAGCTCATTTTCACTATGTTCTTTCTATAGGAGCTG  
TATTTGCAATTATAGCCGGAATTGTCCAATGATTCCCATTATTTACCGGACTAAC  
CTTAAATAATTTTTTTTTTAAAAACCCAATTTATTACTATATTTTTAGGTGTAAATTTA  
ACATTTTTTCCCAACACTTTTTAGGGCTAAGAGGAATGCCTCGGCGATATTCGG  
ATTATCCAGATGCTTTCCTACTATCTGAAATGCCATTTTCATCTATTGGTTCCATTATT  
TCTCTCACAGAATTATCTTTTTTTTATTTATCTTATGAGAAAGGCTTTCTTCCCAA  
CGTAAATCTTTGAGAACTTTAAATGTAACAACCTTCAATTGAATGGTTACAAGCCCT  
ACCCCCTAGTG

SG01

ATTATTAGACAAGAAAGGGGGAAAAAAGAAGCTTTTGGAACCTTAGGAATAATTT  
ATGCCATGATAGCTATCGGATTATTAGGATTCGTAGTTTGAGCTCACCATATATT  
TACAGTAGGGATAGATGTAGATACCCGAGCTTACTTCACTTCAGCAACTATAATT  
ATTGCGGTTCCAACCTGGGATTAAGTCTTTAGATGACTAGCCACCTTTTCATGGAA  
CTCAAATTTTAAATAGACCAGTAACCCTGTGAGCTTTAGGTTTTGTATTTTTATTT  
ACAGTAGGAGGATTAACAGGGGTAATTTTAGCTAATTCTTCAATTGATATTATTCT  
TCACGATACTTACTATGTAGTAGCTCATTTTCACTATGTTCTTTCTATAGGAGCTG  
TATTTGCAATTATAGCCGGAATTGTCCAATGATTCCCATTATTTACCGGACTAAC  
CTTAAATAATTTTTTTTTTAAAAACCCAATTTATTACTATATTTTTAGGTGTAAATTTA  
ACATTTTTTCCCAACACTTTTTAGGGCTAAGAGGAATGCCTCGGCGATATTCGG  
ATTATCCAGATGCTTTCCTACTATCTGAAATGCCATTTTCATCTATTGGTTCCATTATT  
TCTCTCACAGAATTATCTTTTTTTTATTTATCTTATGAGAAAGGCTTTCTTCCCAA  
CGTAAATCTTTGAGAACTTTAAATGTAACAACCTTCAATTGAATGGTTACAAGCCCT  
ACCCCCTAGTG

SG02

ATTATTAGACAAGAAAGGGGGAAAAAAGAAGCTTTTGGAACCTTAGGAATAATTT

ATGCCATGATAGCTATCGGATTATTAGGATTCGTAGTTTGAGCTCACCATATATT  
TACAGTAGGGATAGATGTAGATACCCGAGCTTACTTCACTTCAGCAACTATAATT  
ATTGCGGTTCCAACCTGGGATTAAGTCTTTAGATGACTAGCCACCTTTCATGGAA  
CTCAAATTTTAAATAGACCAGTAACCCTGTGAGCTTTAGGTTTTGTATTTTTATTT  
ACAGTAGGAGGATTAACAGGGGTAATTTTAGCTAATTCTTCAATTGATATTATTCT  
TCACGATACTTACTATGTAGTAGCTCATTTCCTTCTATAGGAGCTG  
TATTTGCAATTATAGCCGGAATTGTCCAATGATTCCCATTATTTACCGGACTAAC  
CTTAAATAATTTTTTTTTTAAAAACCCAATTTATTACTATATTTTTAGGTGTAAATTTA  
ACATTTTTTCCCAACACTTTTTAGGGCTAAGAGGAATGCCTCGGCGATATTCGG  
ATTATCCAGATGCTTTCCTATCTGAAATGCCATTTTCATCTATTGGTTCCATTATT  
TCTCTCACAAGAATTATCTTTTTTTTTATTTATCTTATGAGAAAGGCTTTCTTCCCAA  
CGTAAATCTTTGAGAACTTTAAATGTAACAACCTTCAATTGAATGGTTACAAGCCCT  
ACCCCTAGTG

SJA12

ATTATTAGACAAGAAAGGGGGGAAAAAAGAAGCTTTTGGAACCTTAGGAATAATTT  
ATGCCATGATAGCTATCGGATTATTAGGATTCGTAGTTTGAGCTCACCATATATT  
TACAGTAGGGATAGATGTAGATACCCGAGCTTACTTCACTTCAGCAACTATAATT  
ATTGCGGTTCCAACCTGGGATTAAGTCTTTAGATGACTAGCCACCTTTCATGGAA  
CTCAAATTTTAAATAGACCAGTAACCCTGTGAGCTTTAGGTTTTGTATTTTTATTT  
ACAGTAGGAGGATTAACAGGGGTAATTTTAGCTAATTCTTCAATTGATATTATTCT  
TCACGATACTTACTATGTAGTAGCTCATTTCCTTCTATAGGAGCTG  
TATTTGCAATTATAGCCGGAATTGTCCAATGATTCCCATTATTTACCGGACTAAC  
CTTAAATAATTTTTTTTTTAAAAACCCAATTTATTACTATATTTTTAGGTGTAAATTTA  
ACATTTTTTCCCAACACTTTTTAGGGCTAAGAGGAATGCCTCGGCGATATTCGG  
ATTATCCAGATGCTTTCCTATCTGAAATGCCATTTTCATCTATTGGTTCCATTATT  
TCTCTCACAAGAATTATCTTTTTTTTTATTTATCTTATGAGAAAGGCTTTCTTCCCAA  
CGTAAATCTTTGAGAACTTTAAATGTAACAACCTTCAATTGAATGGTTACAAGCCCT  
ACCCCTAGTG

SJA13

ATTATTAGACAAGAAAGGGGGGAAAAAAGAAGCTTTTGGAACCTTAGGAATAATTT  
ATGCCATGATAGCTATCGGATTATTAGGATTCGTAGTTTGAGCTCACCATATATT  
TACAGTAGGGATAGATGTAGATACCCGAGCTTACTTCACTTCAGCAACTATAATT  
ATTGCGGTTCCAACCTGGGATTAAGTCTTTAGATGACTAGCCACCTTTCATGGAA  
CTCAAATTTTAAATAGACCAGTAACCCTGTGAGCTTTAGGTTTTGTATTTTTATTT  
ACAGTAGGAGGATTAACAGGGGTAATTTTAGCTAATTCTTCAATTGATATTATTCT  
TCACGATACTTACTATGTAGTAGCTCATTTCCTTCTATAGGAGCTG  
TATTTGCAATTATAGCCGGAATTGTCCAATGATTCCCATTATTTACCGGACTAAC  
CTTAAATAATTTTTTTTTTAAAAACCCAATTTATTACTATATTTTTAGGTGTAAATTTA  
ACATTTTTTCCCAACACTTTTTAGGGCTAAGAGGAATGCCTCGGCGATATTCGG  
ATTATCCAGATGCTTTCCTATCTGAAATGCCATTTTCATCTATTGGTTCCATTATT  
TCTCTCACAAGAATTATCTTTTTTTTTATTTATCTTATGAGAAAGGCTTTCTTCCCAA  
CGTAAATCTTTGAGAACTTTAAATGTAACAACCTTCAATTGAATGGTTACAAGCCCT  
ACCCCTAGTG

SJA14

ATTATTAGACAAGAAAGGGGGGAAAAAAGAAGCTTTTGGAACCTTAGGAATAATTT  
ATGCCATGATAGCTATCGGATTATTAGGATTCGTAGTTTGAGCTCACCATATATT  
TACAGTAGGGATAGATGTAGATACCCGAGCTTACTTCACTTCAGCAACTATAATT  
ATTGCGGTTCCAACCTGGGATTAAGTCTTTAGATGACTAGCCACCTTTCATGGAA  
CTCAAATTTTAAATAGACCAGTAACCCTGTGAGCTTTAGGTTTTGTATTTTTATTT  
ACAGTAGGAGGATTAACAGGGGTAATTTTAGCTAATTCTTCAATTGATATTATTCT

TCACGATACTTACTATGTAGTAGCTCATTTCCTACTATGTTCTTTCTATAGGAGCTG  
TATTTGCAATTATAGCCGGAATTGTCCAATGATTCCCATTATTTACCGGACTAAC  
CTTAAATAATTTTTTTTTAAAAACCCAATTTACTATATTTTTAGGTGTAAATTTA  
ACATTTTTTCCCAACACTTTTTAGGGCTAAGAGGAATGCCTCGGCGATATTCGG  
ATTATCCAGATGCTTTCCTACTATCTGAAATGCCATTTTCATCTATTGGTTCCATTATT  
TCTCTACAAGAATTATCTTTTTTTTTATTTATCTTATGAGAAAGGCTTTCTTCCCAA  
CGTAAATCTTTGAGAACTTTAAATGTAACAACCTTCAATTGAATGGTTACAAGCCCT  
ACCCCCTAGTG

SJA17

ATTATTAGACAAGAAAGGGGGGAAAAAGAAGCTTTTGGAACCTTAGGAATAATTT  
ATGCCATGATAGCTATCGGATTATTAGGATTCGTAGTTTGAGCTCACCATATATT  
TACAGTAGGGATAGATGTAGATACCCGAGCTTACTTCACTTCAGCAACTATAATT  
ATTGCGGTTCCAACCTGGGATTAAAGTCTTTAGATGACTAGCCACCTTTCATGGAA  
CTCAAATTTTAAATAGACCAGTAACCCTGTGAGCTTTAGGTTTTGTATTTTTATTT  
ACAGTAGGAGGATTAACAGGGGTAATTTTAGCTAATTCTTCAATTGATATTATTCT  
TCACGATACTTACTATGTAGTAGCTCATTTCCTACTATGTTCTTTCTATAGGAGCTG  
TATTTGCAATTATAGCCGGAATTGTCCAATGATTCCCATTATTTACCGGACTAAC  
CTTAAATAATTTTTTTTTAAAAACCCAATTTACTATATTTTTAGGTGTAAATTTA  
ACATTTTTTCCCAACACTTTTTAGGGCTAAGAGGAATGCCTCGGCGATATTCGG  
ATTATCCAGATGCTTTCCTACTATCTGAAATGCCATTTTCATCTATTGGTTCCATTATT  
TCTCTACAAGAATTATCTTTTTTTTTATTTATCTTATGAGAAAGGCTTTCTTCCCAA  
CGTAAATCTTTGAGAACTTTAAATGTAACAACCTTCAATTGAATGGTTACAAGCCCT  
ACCCCCTAGTG

SJA3

ATTATTAGACAAGAAAGGGGGGAAAAAGAAGCTTTTGGAACCTTAGGAATAATTT  
ATGCCATGATAGCTATCGGATTATTAGGATTCGTAGTTTGAGCTCACCATATATT  
TACAGTAGGGATAGATGTAGATACCCGAGCTTACTTCACTTCAGCAACTATAATT  
ATTGCGGTTCCAACCTGGGATTAAAGTCTTTAGATGACTAGCCACCTTTCATGGAA  
CTCAAATTTTAAATAGACCAGTAACCCTGTGAGCTTTAGGTTTTGTATTTTTATTT  
ACAGTAGGAGGATTAACAGGGGTAATTTTAGCTAATTCTTCAATTGATATTATTCT  
TCACGATACTTACTATGTAGTAGCTCATTTCCTACTATGTTCTTTCTATAGGAGCTG  
TATTTGCAATTATAGCCGGAATTGTCCAATGATTCCCATTATTTACCGGACTAAC  
CTTAAATAATTTTTTTTTAAAAACCCAATTTACTATATTTTTAGGTGTAAATTTA  
ACATTTTTTCCCAACACTTTTTAGGGCTAAGAGGAATGCCTCGGCGATATTCGG  
ATTATCCAGATGCTTTCCTACTATCTGAAATGCCATTTTCATCTATTGGTTCCATTATT  
TCTCTACAAGAATTATCTTTTTTTTTATTTATCTTATGAGAAAGGCTTTCTTCCCAA  
CGTAAATCTTTGAGAACTTTAAATGTAACAACCTTCAATTGAATGGTTACAAGCCCT  
ACCCCCTAGTG

SJA4

ATTATTAGACAAGAAAGGGGGGAAAAAGAAGCTTTTGGAACCTTAGGAATAATTT  
ATGCCATGATAGCTATCGGATTATTAGGATTCGTAGTTTGAGCTCACCATATATT  
TACAGTAGGGATAGATGTAGATACCCGAGCTTACTTCACTTCAGCAACTATAATT  
ATTGCGGTTCCAACCTGGGATTAAAGTCTTTAGATGACTAGCCACCTTTCATGGAA  
CTCAAATTTTAAATAGACCAGTAACCCTGTGAGCTTTAGGTTTTGTATTTTTATTT  
ACAGTAGGAGGATTAACAGGGGTAATTTTAGCTAATTCTTCAATTGATATTATTCT  
TCACGATACTTACTATGTAGTAGCTCATTTCCTACTATGTTCTTTCTATAGGAGCTG  
TATTTGCAATTATAGCCGGAATTGTCCAATGATTCCCATTATTTACCGGACTAAC  
CTTAAATAATTTTTTTTTAAAAACCCAATTTACTATATTTTTAGGTGTAAATTTA  
ACATTTTTTCCCAACACTTTTTAGGGCTAAGAGGAATGCCTCGGCGATATTCGG  
ATTATCCAGATGCTTTCCTACTATCTGAAATGCCATTTTCATCTATTGGTTCCATTATT

TCTCTCACAGAATTATCTTTTTTTTATTTATCTTATGAGAAAGGCTTTCTTCCCAA  
CGTAAATCTTTGAGAACTTTAAATGTAACAACCTTCAATTGAATGGTTACAAGCCCT  
ACCCCCTAGTG

SJA5

ATTATTAGACAAGAAAGGGGGAAAAAAGAAGCTTTTGGAACCTTAGGAATAATTT  
ATGCCATGATAGCTATCGGATTATTAGGATTCGTAGTTTGAGCTCACCATATATT  
TACAGTAGGGATAGATGTAGATACCCGAGCTTACTTCACTTCAGCAACTATAATT  
ATTGCGGTTCCAACCTGGGATTAAGTCTTTAGATGACTAGCCACCTTTTCATGGAA  
CTCAAATTTTAAATAGACCAGTAACCCTGTGAGCTTTAGGTTTTGTATTTTTATTT  
ACAGTAGGAGGATTAACAGGGGTAATTTTAGCTAATTCTTCAATTGATATTATTCT  
TCACGATACTTACTATGTAGTAGCTCATTTTCACTATGTTCTTTCTATAGGAGCTG  
TATTTGCAATTATAGCCGGAATTGTCCAATGATTCCCATTATTTACCGGACTAAC  
CTTAAATAATTTTTTTTTTAAAAACCCAATTTATTACTATATTTTTAGGTGTAAATTTA  
ACATTTTTTCCCAACACTTTTTAGGGCTAAGAGGAATGCCTCGGCGATATTCGG  
ATTATCCAGATGCTTTCCTACTATCTGAAATGCCATTTTCATCTATTGGTTCCATTATT  
TCTCTCACAGAATTATCTTTTTTTTATTTATCTTATGAGAAAGGCTTTCTTCCCAA  
CGTAAATCTTTGAGAACTTTAAATGTAACAACCTTCAATTGAATGGTTACAAGCCCT  
ACCCCCTAGTG

SMA1

ATTATTAGACAAGAAAGGGGGAAAAAAGAAGCTTTTGGAACCTTAGGAATAATTT  
ATGCCATGATAGCTATCGGATTATTAGGATTCGTAGTTTGAGCTCACCATATATT  
TACAGTAGGGATAGATGTAGATACCCGAGCTTACTTCACTTCAGCAACTATAATT  
ATTGCGGTTCCAACCTGGGATTAAGTCTTTAGATGACTAGCCACCTTTTCATGGAA  
CTCAAATTTTAAATAGACCAGTAACCCTGTGAGCTTTAGGTTTTGTATTTTTATTT  
ACAGTAGGAGGATTAACAGGGGTAATTTTAGCTAATTCTTCAATTGATATTATTCT  
TCACGATACTTACTATGTAGTAGCTCATTTTCACTATGTTCTTTCTATAGGAGCTG  
TATTTGCAATTATAGCCGGAATTGTCCAATGATTCCCATTATTTACCGGACTAAC  
CTTAAATAATTTTTTTTTTAAAAACCCAATTTATTACTATATTTTTAGGTGTAAATTTA  
ACATTTTTTCCCAACACTTTTTAGGGCTAAGAGGAATGCCTCGGCGATATTCGG  
ATTATCCAGATGCTTTCCTACTATCTGAAATGCCATTTTCATCTATTGGTTCCATTATT  
TCTCTCACAGAATTATCTTTTTTTTATTTATCTTATGAGAAAGGCTTTCTTCCCAA  
CGTAAATCTTTGAGAACTTTAAATGTAACAACCTTCAATTGAATGGTTACAAGCCCT  
ACCCCCTAGTG

SMA10

ATTATTAGACAAGAAAGGGGGAAAAAAGAAGCTTTTGGAACCTTAGGAATAATTT  
ATGCCATGATAGCTATCGGATTATTAGGATTCGTAGTTTGAGCTCACCATATATT  
TACAGTAGGGATAGATGTAGATACCCGAGCTTACTTCACTTCAGCAACTATAATT  
ATTGCGGTTCCAACCTGGGATTAAGTCTTTAGATGACTAGCCACCTTTTCATGGAA  
CTCAAATTTTAAATAGACCAGTAACCCTGTGAGCTTTAGGTTTTGTATTTTTATTT  
ACAGTAGGAGGATTAACAGGGGTAATTTTAGCTAATTCTTCAATTGATATTATTCT  
TCACGATACTTACTATGTAGTAGCTCATTTTCACTATGTTCTTTCTATAGGAGCTG  
TATTTGCAATTATAGCCGGAATTGTCCAATGATTCCCATTATTTACCGGACTAAC  
CTTAAATAATTTTTTTTTTAAAAACCCAATTTATTACTATATTTTTAGGTGTAAATTTA  
ACATTTTTTCCCAACACTTTTTAGGGCTAAGAGGAATGCCTCGGCGATATTCGG  
ATTATCCAGATGCTTTCCTACTATCTGAAATGCCATTTTCATCTATTGGTTCCATTATT  
TCTCTCACAGAATTATCTTTTTTTTATTTATCTTATGAGAAAGGCTTTCTTCCCAA  
CGTAAATCTTTGAGAACTTTAAATGTAACAACCTTCAATTGAATGGTTACAAGCCCT  
ACCCCCTAGTG

SMA11

ATTATTAGACAAGAAAGGGGGAAAAAAGAAGCTTTTGGAACCTTAGGAATAATTT

ATGCCATGATAGCTATCGGATTATTAGGATTCGTAGTTTGAGCTCACCATATATT  
TACAGTAGGGATAGATGTAGATACCCGAGCTTACTTCACTTCAGCAACTATAATT  
ATTGCGGTTCCAACCTGGGATTAAGTCTTTAGATGACTAGCCACCTTTCATGGAA  
CTCAAATTTTAAATAGACCAGTAACCCTGTGAGCTTTAGGTTTTGTATTTTTATTT  
ACAGTAGGAGGATTAACAGGGGTAATTTTAGCTAATTCTTCAATTGATATTATTCT  
TCACGATACTTACTATGTAGTAGCTCATTTCCTTCTTCTATAGGAGCTG  
TATTTGCAATTATAGCCGGAATTGTCCAATGATTCCCATTATTTACCGGACTAAC  
CTTAAATAATTTTTTTTTTAAAAACCCAATTTATTACTATATTTTTTAGGTGTAAATTTA  
ACATTTTTTCCCAACACTTTTTAGGGCTAAGAGGAATGCCTCGGCGATATTCGG  
ATTATCCAGATGCTTTCCTATCTGAAATGCCATTTTCATCTATTGGTTCCATTATT  
TCTCTCACAGAATTATCTTTTTTTTTATTTATCTTATGAGAAAGGCTTTCTTCCCAA  
CGTAAATCTTTGAGAACTTTAAATGTAACAACCTTCAATTGAATGGTTACAAGCCCT  
ACCCCTAGTG

SMA12

ATTATTAGACAAGAAAGGGGGGAAAAAAGAAGCTTTTGGAACCTTAGGAATAATTT  
ATGCCATGATAGCTATCGGATTATTAGGATTCGTAGTTTGAGCTCACCATATATT  
TACAGTAGGGATAGATGTAGATACCCGAGCTTACTTCACTTCAGCAACTATAATT  
ATTGCGGTTCCAACCTGGGATTAAGTCTTTAGATGACTAGCCACCTTTCATGGAA  
CTCAAATTTTAAATAGACCAGTAACCCTGTGAGCTTTAGGTTTTGTATTTTTATTT  
ACAGTAGGAGGATTAACAGGGGTAATTTTAGCTAATTCTTCAATTGATATTATTCT  
TCACGATACTTACTATGTAGTAGCTCATTTCCTTCTTCTATAGGAGCTG  
TATTTGCAATTATAGCCGGAATTGTCCAATGATTCCCATTATTTACCGGACTAAC  
CTTAAATAATTTTTTTTTTAAAAACCCAATTTATTACTATATTTTTTAGGTGTAAATTTA  
ACATTTTTTCCCAACACTTTTTAGGGCTAAGAGGAATGCCTCGGCGATATTCGG  
ATTATCCAGATGCTTTCCTATCTGAAATGCCATTTTCATCTATTGGTTCCATTATT  
TCTCTCACAGAATTATCTTTTTTTTTATTTATCTTATGAGAAAGGCTTTCTTCCCAA  
CGTAAATCTTTGAGAACTTTAAATGTAACAACCTTCAATTGAATGGTTACAAGCCCT  
ACCCCTAGTG

SMA13

ATTATTAGACAAGAAAGGGGGGAAAAAAGAAGCTTTTGGAACCTTAGGAATAATTT  
ATGCCATGATAGCTATCGGATTATTAGGATTCGTAGTTTGAGCTCACCATATATT  
TACAGTAGGGATAGATGTAGATACCCGAGCTTACTTCACTTCAGCAACTATAATT  
ATTGCGGTTCCAACCTGGGATTAAGTCTTTAGATGACTAGCCACCTTTCATGGAA  
CTCAAATTTTAAATAGACCAGTAACCCTGTGAGCTTTAGGTTTTGTATTTTTATTT  
ACAGTAGGAGGATTAACAGGGGTAATTTTAGCTAATTCTTCAATTGATATTATTCT  
TCACGATACTTACTATGTAGTAGCTCATTTCCTTCTTCTATAGGAGCTG  
TATTTGCAATTATAGCCGGAATTGTCCAATGATTCCCATTATTTACCGGACTAAC  
CTTAAATAATTTTTTTTTTAAAAACCCAATTTATTACTATATTTTTTAGGTGTAAATTTA  
ACATTTTTTCCCAACACTTTTTAGGGCTAAGAGGAATGCCTCGGCGATATTCGG  
ATTATCCAGATGCTTTCCTATCTGAAATGCCATTTTCATCTATTGGTTCCATTATT  
TCTCTCACAGAATTATCTTTTTTTTTATTTATCTTATGAGAAAGGCTTTCTTCCCAA  
CGTAAATCTTTGAGAACTTTAAATGTAACAACCTTCAATTGAATGGTTACAAGCCCT  
ACCCCTAGTG

SMA14

ATTATTAGACAAGAAAGGGGGGAAAAAAGAAGCTTTTGGAACCTTAGGAATAATTT  
ATGCCATGATAGCTATCGGATTATTAGGATTCGTAGTTTGAGCTCACCATATATT  
TACAGTAGGGATAGATGTAGATACCCGAGCTTACTTCACTTCAGCAACTATAATT  
ATTGCGGTTCCAACCTGGGATTAAGTCTTTAGATGACTAGCCACCTTTCATGGAA  
CTCAAATTTTAAATAGACCAGTAACCCTGTGAGCTTTAGGTTTTGTATTTTTATTT  
ACAGTAGGAGGATTAACAGGGGTAATTTTAGCTAATTCTTCAATTGATATTATTCT

TCACGATACTTACTATGTAGTAGCTCATTTCCTTCTATAGGAGCTG  
TATTTGCAATTATAGCCGGAATTGTCCAATGATTCCCATTATTTACCGGACTAAC  
CTTAAATAATTTTTTTTTAAAAACCCAATTTACTATATTTTTAGGTGTAAATTTA  
ACATTTTTTCCCAACACTTTTTAGGGCTAAGAGGAATGCCTCGGCGATATTCGG  
ATTATCCAGATGCTTTCCTATCTGAAATGCCATTTTCATCTATTGGTTCCATTATT  
TCTCTACAAGAATTATCTTTTTTTTTATTTATCTTATGAGAAAGGCTTTCTTCCCAA  
CGTAAATCTTTGAGAACTTTAAATGTAACAACCTTCAATTGAATGGTTACAAGCCCT  
ACCCCTAGTG

SMA6

ATTATTAGACAAGAAAGGGGGAAAAAAGAAGCTTTTGAACCTTAGGAATAATTT  
ATGCCATGATAGCTATCGGATTATTAGGATTCGTAGTTTGAGCTCACCATATATT  
TACAGTAGGGATAGATGTAGATACCCGAGCTTACTTCACTTCAGCAACTATAATT  
ATTGCGGTTCCAACCTGGGATTAAAGTCTTTAGATGACTAGCCACCTTTCATGGAA  
CTCAAATTTTAAATAGACCAGTAACCCTGTGAGCTTTAGGTTTTGTATTTTTATTT  
ACAGTAGGAGGATTAACAGGGGTAATTTTAGCTAATTCTTCAATTGATATTATTCT  
TCACGATACTTACTATGTAGTAGCTCATTTCCTTCTATAGGAGCTG  
TATTTGCAATTATAGCCGGAATTGTCCAATGATTCCCATTATTTACCGGACTAAC  
CTTAAATAATTTTTTTTTAAAAACCCAATTTACTATATTTTTAGGTGTAAATTTA  
ACATTTTTTCCCAACACTTTTTAGGGCTAAGAGGAATGCCTCGGCGATATTCGG  
ATTATCCAGATGCTTTCCTATCTGAAATGCCATTTTCATCTATTGGTTCCATTATT  
TCTCTACAAGAATTATCTTTTTTTTTATTTATCTTATGAGAAAGGCTTTCTTCCCAA  
CGTAAATCTTTGAGAACTTTAAATGTAACAACCTTCAATTGAATGGTTACAAGCCCT  
ACCCCTAGTG

SMI1

ATTATTAGACAAGAAAGGGGGAAAAAAGAAGCTTTTGAACCTTAGGAATAATTT  
ATGCCATGATAGCTATCGGATTATTAGGATTCGTAGTTTGAGCTCACCATATATT  
TACAGTAGGGATAGATGTAGATACCCGAGCTTACTTCACTTCAGCAACTATAATT  
ATTGCGGTTCCAACCTGGGATTAAAGTCTTTAGATGACTAGCCACCTTTCATGGAA  
CTCAAATTTTAAATAGACCAGTAACCCTGTGAGCTTTAGGTTTTGTATTTTTATTT  
ACAGTAGGAGGATTAACAGGGGTAATTTTAGCTAATTCTTCAATTGATATTATTCT  
TCACGATACTTACTATGTAGTAGCTCATTTCCTTCTATAGGAGCTG  
TATTTGCAATTATAGCCGGAATTGTCCAATGATTCCCATTATTTACCGGACTAAC  
CTTAAATAATTTTTTTTTAAAAACCCAATTTACTATATTTTTAGGTGTAAATTTA  
ACATTTTTTCCCAACACTTTTTAGGGCTAAGAGGAATGCCTCGGCGATATTCGG  
ATTATCCAGATGCTTTCCTATCTGAAATGCCATTTTCATCTATTGGTTCCATTATT  
TCTCTACAAGAATTATCTTTTTTTTTATTTATCTTATGAGAAAGGCTTTCTTCCCAA  
CGTAAATCTTTGAGAACTTTAAATGTAACAACCTTCAATTGAATGGTTACAAGCCCT  
ACCCCTAGTG

SMI2

ATTATTAGACAAGAAAGGGGGAAAAAAGAAGCTTTTGAACCTTAGGAATAATTT  
ATGCCATGATAGCTATCGGATTATTAGGATTCGTAGTTTGAGCTCACCATATATT  
TACAGTAGGGATAGATGTAGATACCCGAGCTTACTTCACTTCAGCAACTATAATT  
ATTGCGGTTCCAACCTGGGATTAAAGTCTTTAGATGACTAGCCACCTTTCATGGAA  
CTCAAATTTTAAATAGACCAGTAACCCTGTGAGCTTTAGGTTTTGTATTTTTATTT  
ACAGTAGGAGGATTAACAGGGGTAATTTTAGCTAATTCTTCAATTGATATTATTCT  
TCACGATACTTACTATGTAGTAGCTCATTTCCTTCTATAGGAGCTG  
TATTTGCAATTATAGCCGGAATTGTCCAATGATTCCCATTATTTACCGGACTAAC  
CTTAAATAATTTTTTTTTAAAAACCCAATTTACTATATTTTTAGGTGTAAATTTA  
ACATTTTTTCCCAACACTTTTTAGGGCTAAGAGGAATGCCTCGGCGATATTCGG  
ATTATCCAGATGCTTTCCTATCTGAAATGCCATTTTCATCTATTGGTTCCATTATT



TCTCTCACAGAATTATCTTTTTTTTATTTATCTTATGAGAAAGGCTTTCTTCCCAA  
CGTAAATCTTTGAGAACTTTAAATGTAACAACCTTCAATTGAATGGTTACAAGCCCT  
ACCCCCTAGTG

sob1

ATTATTAGACAAGAAAGGGGGGAAAAAAGAAGCTTTTGGAACCTTAGGAATAATTT  
ATGCCATGATAGCTATCGGATTATTAGGATTCGTAGTTTGAGCTCACCATATATT  
TACAGTAGGGATAGATGTAGATACCCGAGCTTACTTCACTTCAGCAACTATAATT  
ATTGCGGTTCCAACCTGGGATTAAGTCTTTAGATGACTAGCCACCTTTTCATGGAA  
CTCAAATTTTAAATAGACCAGTAACCCTGTGAGCTTTAGGTTTTGTATTTTTATTT  
ACAGTAGGAGGATTAACGGGGGTAATTTTAGCTAATTCTTCAATTGATATTATTC  
TTCACGATACTTACTATGTAGTAGCTCATTTTTCACTATGTTCTTTCTATAGGAGCT  
GTATTTGCAATTATAGCCGGAATTGTCCAATGATTCCCATTATTTACCGGACTAA  
CCTTAAATAATTTTTTTTTTAAAAACCCAATTTATTACTATATTTTTAGGTGTAAATTT  
AACATTTTTTCCCAACACTTTTTAGGGCTAAGAGGAATGCCTCGGCGATATTTCG  
GATTATCCAGATGCTTTCACTATCTGAAATGCCATTTTCATCTATTGGTTCCATTAT  
TTCTCTCACAGAATTATCTTTTTTTTATTTATCTTATGAGAAAGGCTTTCTTCCCA  
ACGTAATCTTTGAGAACTTTAAATGTAACAACCTTCAATTGAATGGTTACAAGCC  
CTACCCCCTAGTG

SOB10

ATTATTAGACAAGAAAGGGGGGAAAAAAGAAGCTTTTGGAACCTTAGGAATAATTT  
ATGCCATGATAGCTATCGGATTATTAGGATTCGTAGTTTGAGCTCACCATATATT  
TACAGTAGGGATAGATGTAGATACCCGAGCTTACTTCACTTCAGCAACTATAATT  
ATCGCGGTTCCAACCTGGGATTAAGTCTTTAGGTGACTAGCCACCTTTTCATGGA  
ACTCAAATTTTAAATAGACCAGTAACCCTGTGAGCTTTAGGTTTTGTATTTTTATT  
TACAGTAGGAGGATTAACAGGGGTAATTTTAGCTAATTCTTCAATTGATATTATTC  
TTCACGATACTTACTATGTAGTAGCTCATTTTTCACTATGTTCTTTCTATAGGAGCT  
GTATTTGCAATTATAGCCGGAATTGTCCAATGATTCCCATTATTTACTGGACTAA  
CCTTAAATAATTTTTTTTTTAAAAACCCAATTTATTACTATATTTTTAGGTGTAAATTT  
AACATTTTTTCTCAACACTTTTTAGGGCTAAGAGGGATGCCTCGGCGATATTTCG  
GATTATCCAGATGCTTTCACTATCTGAAATGCCATTTTCATCTATTGGTTCCATTAT  
TTCTCTCACAGAATTATCTTTTTTTTATTTATCTTATGAGAAAGGCTTTCTTCCCA  
ACGTAATCTTTGAGAACTTTAAATGTAACAACCTTCAATTGAATGGTTACAAGCC  
CTACCCCCTAGTG

SOB12

ATTATTAGACAAGAAAGGGGGGAAAAAAGAAGCTTTTGGAACCTTAGGAATAATTT  
ATGCCATGATAGCTATCGGATTATTAGGATTCGTAGTTTGAGCTCACCATATATT  
TACAGTAGGGATAGATGTAGATACCCGAGCTTACTTCACTTCAGCAACTATAATT  
ATCGCGGTTCCAACCTGGGATTAAGTCTTTAGGTGACTAGCCACCTTTTCATGGA  
ACTCAAATTTTAAATAGACCAGTAACCCTGTGAGCTTTAGGTTTTGTATTTTTATT  
TACAGTAGGAGGATTAACAGGGGTAATTTTAGCTAATTCTTCAATTGATATTATTC  
TTCACGATACTTACTATGTAGTAGCTCATTTTTCACTATGTTCTTTCTATAGGAGCT  
GTATTTGCAATTATAGCCGGAATTGTCCAATGATTCCCATTATTTACTGGACTAA  
CCTTAAATAATTTTTTTTTTAAAAACCCAATTTATTACTATATTTTTAGGTGTAAATTT  
AACATTTTTTCTCAACACTTTTTAGGGCTAAGAGGAATGCCTCGGCGATATTTCG  
GATTATCCAGATGCTTTCACTATCTGAAATGCCATTTTCATCTATTGGTTCCATTAT  
TTCTCTCACAGAATTATCTTTTTTTTATTTATCTTATGAGAAAGGCTTTCTTCCCA  
ACGTAATCTTTGAGAACTTTAAATGTAACAACCTTCAATTGAATGGTTACAAGCC  
CTACCCCCTAGTG

SOB1\_2

ATTATTAGACAAGAAAGGGGGGAAAAAAGAAGCTTTTGGAACCTTAGGAATAATTT

ATGCCATGATAGCTATCGGATTATTAGGATTCGTAGTTTGAGCTCACCATATATT  
TACAGTAGGGATAGATGTAGATACCCGAGCTTACTTCACTTCAGCAACTATAATT  
ATCGCGGTTCCAACCTGGGATTAAGTCTTTAGGTGACTAGCCACCTTTCATGGA  
ACTCAAATTTTAAATAGACCAGTAACCCTGTGAGCTTTAGGTTTTGTATTTTTATT  
TACAGTAGGAGGATTAACAGGGGTAATTTTAGCTAATTCTTCAATTGATATTATTC  
TTCACGATACTTACTATGTAGTAGCTCATTTTTCACTATGTTCTTTCTATAGGAGCT  
GTATTTGCAATTATAGCCGGAATTGTCCAATGATTCCCATTATTTACTGGACTAA  
CCTTAAATAATTTTTTTTTTAAAAACCCAATTTATTACTATATTTTTTAGGTGTAAATTT  
AACATTTTTTCTCAACACTTTTTAGGGCTAAGAGGAATGCCTCGGCGATATTTCG  
GATTATCCAGATGCTTTCCTATCTGAAATGCCATTTTCATCTATTGGTTCCATTAT  
TTCTCTCACAAGAATTATCTTTTTTTTTATTTATCTTATGAGAAAGGCTTTCTTCCCA  
ACGTAATCTTTGAGAACTTTAAATGTAACAACCTTCAATTGAATGGTTACAAGCC  
CTACCCCCTAGTG

SOB2

ATTATTAGACAAGAAAGGGGGGAAAAAAGAAGCTTTTGGAACCTTAGGAATAATTT  
ATGCCATGATAGCTATCGGATTATTAGGATTCGTAGTTTGAGCTCACCATATATT  
TACAGTAGGGATAGATGTAGATACCCGAGCTTACTTCACTTCAGCAACTATAATT  
ATTGCGGTTCCAACCTGGGATTAAGTCTTTAGATGACTAGCCACCTTTCATGGAA  
CTCAAATTTTAAATAGACCAGTAACCCTGTGAGCTTTAGGTTTTGTATTTTTATTT  
ACAGTAGGAGGATTAACGGGGGTAATTTTAGCTAATTCTTCAATTGATATTATTC  
TTCACGATACTTACTATGTAGTAGCTCATTTTTCACTATGTTCTTTCTATAGGAGCT  
GTATTTGCAATTATAGCCGGAATTGTCCAATGATTCCCATTATTTACCGGACTAA  
CCTTAAATAATTTTTTTTTTAAAAACCCAATTTATTACTATATTTTTTAGGTGTAAATTT  
AACATTTTTTCCCCAACACTTTTTAGGGCTAAGAGGAATGCCTCGGCGATATTTCG  
GATTATCCAGATGCTTTCCTATCTGAAATGCCATTTTCATCTATTGGTTCCATTAT  
TTCTCTCACAAGAATTATCTTTTTTTTTATTTATCTTATGAGAAAGGCTTTCTTCCCA  
ACGTAATCTTTGAGAACTTTAAATGTAACAACCTTCAATTGAATGGTTACAAGCC  
CTACCCCCTAGTG

SOB2\_1

ATTATTAGACAAGAAAGGGGGGAAAAAAGAAGCTTTTGGAACCTTAGGAATAATTT  
ATGCCATGATAGCTATCGGATTATTAGGATTCGTAGTTTGAGCTCACCATATATT  
TACAGTAGGGATAGATGTAGATACCCGAGCTTACTTCACTTCAGCAACTATAATT  
ATCGCGGTTCCAACCTGGGATTAAGTCTTTAGGTGACTAGCCACCTTTCATGGA  
ACTCAAATTTTAAATAGACCAGTAACCCTGTGAGCTTTAGGTTTTGTATTTTTATT  
TACAGTAGGAGGATTAACAGGGGTAATTTTAGCTAATTCTTCAATTGATATTATTC  
TTCACGATACTTACTATGTAGTAGCTCATTTTTCACTATGTTCTTTCTATAGGAGCT  
GTATTTGCAATTATAGCCGGAATTGTCCAATGATTCCCATTATTTACTGGACTAA  
CCTTAAATAATTTTTTTTTTAAAAACCCAATTTATTACTATATTTTTTAGGTGTAAATTT  
AACATTTTTTCTCAACACTTTTTAGGGCTAAGAGGAATGCCTCGGCGATATTTCG  
GATTATCCAGATGCTTTCCTATCTGAAATGCCATTTTCATCTATTGGTTCCATTAT  
TTCTCTCACAAGAATTATCTTTTTTTTTATTTATCTTATGAGAAAGGCTTTCTTCCCA  
ACGTAATCTTTGAGAACTTTAAATGTAACAACCTTCAATTGAATGGTTACAAGCC  
CTACCCCCTAGTG

TAP1

ATTATTAGACAAGAAAGGGGGGAAAAAAGAAGCTTTTGGAACCTTAGGAATAATTT  
ATGCCATGATAGCTATCGGATTATTAGGATTCGTAGTTTGAGCTCACCATATATT  
TACAGTAGGGATAGATGTAGATACCCGAGCTTACTTCACTTCAGCAACTATAATT  
ATTGCGGTTCCAACCTGGGATTAAGTCTTTAGATGACTAGCCACCTTTCATGGAA  
CTCAAATTTTAAATAGACCAGTAACCCTGTGAGCTTTAGGTTTTGTATTTTTATTT  
ACAGTAGGAGGATTAACAGGGGTAATTTTAGCTAATTCTTCAATTGATATTATTC

TCACGATACTTACTATGTAGTAGCTCATTTCCTACTATGTTCTTTCTATAGGAGCTG  
TATTTGCAATTATAGCCGGAATTGTCCAATGATTCCCATTATTTACCGGACTAAC  
CTTAAATAATTTTTTTTTAAAAACCCAATTTACTATATTTTTAGGTGTAAATTTA  
ACATTTTTTCCCAACACTTTTTAGGGCTAAGAGGAATGCCTCGGCGATATTCGG  
ATTATCCAGATGCTTTCCTACTATCTGAAATGCCATTTTCATCTATTGGTTCCATTATT  
TCTCTACAAGAATTATCTTTTTTTTTATTTATCTTATGAGAAAGGCTTTCTTCCCAA  
CGTAAATCTTTGAGAACTTTAAATGTAACAACCTTCAATTGAATGGTTACAAGCCCT  
ACCCCCTAGTG

TAP2

ATTATTAGACAAGAAAGGGGGGAAAAAGAAGCTTTTGGAACCTTAGGAATAATTT  
ATGCCATGATAGCTATCGGATTATTAGGATTCGTAGTTTGAGCTCACCATATATT  
TACAGTAGGGATAGATGTAGATACCCGAGCTTACTTCACTTCAGCAACTATAATT  
ATTGCGGTTCCAACCTGGGATTAAAGTCTTTAGATGACTAGCCACCTTTCATGGAA  
CTCAAATTTTAAATAGACCAGTAACCCTGTGAGCTTTAGGTTTTGTATTTTTATTT  
ACAGTAGGAGGATTAACAGGGGTAATTTTAGCTAATTCTTCAATTGATATTATTCT  
TCACGATACTTACTATGTAGTAGCTCATTTCCTACTATGTTCTTTCTATAGGAGCTG  
TATTTGCAATTATAGCCGGAATTGTCCAATGATTCCCATTATTTACCGGACTAAC  
CTTAAATAATTTTTTTTTAAAAACCCAATTTACTATATTTTTAGGTGTAAATTTA  
ACATTTTTTCCCAACACTTTTTAGGGCTAAGAGGAATGCCTCGGCGATATTCGG  
ATTATCCAGATGCTTTCCTACTATCTGAAATGCCATTTTCATCTATTGGTTCCATTATT  
TCTCTACAAGAATTATCTTTTTTTTTATTTATCTTATGAGAAAGGCTTTCTTCCCAA  
CGTAAATCTTTGAGAACTTTAAATGTAACAACCTTCAATTGAATGGTTACAAGCCCT  
ACCCCCTAGTG

tol1

ATTATTAGACAAGAAAGGGGGGAAAAAGAAGCTTTTGGAGCCTTAGGAATAATTT  
ATGCCATGATAGCTATCGGATTATTAGGATTCGTAGTTTGAGCTCACCATATATT  
TACAGTAGGGATAGATGTAGATACCCGAGCTTACTTCACTTCAGCAACTATAATT  
ATTGCGGTTCCAACCTGGGATTAAAGTCTTTAGATGACTAGCCACCTTTCATGGAA  
CTCAAATTTTAAATAGACCAGTAACCCTGTGAGCTTTAGGTTTTGTATTTTTATTT  
ACAGTAGGAGGATTAACAGGGGTAATTTTAGCTAATTCTTCAATTGATATTATTCT  
TCACGATACTTACTATGTAGTAGCTCATTTCCTACTATGTTCTTTCTATAGGAGCTG  
TATTTGCAATTATAGCCGGAATTGTCCAATGATTCCCATTATTTACCGGACTAAC  
CTTAAATAATTTTTTTTTAAAAACCCAATTTACTATATTTTTAGGTGTAAATTTA  
ACATTTTTTCCCAACACTTTTTAGGGCTAAGAGGAATGCCTCGGCGATATTCGG  
ATTATCCAGATGCTTTCCTACTATCTGAAATGCCATTTTCATCTATTGGTTCCATTATT  
TCTCTACAAGAATTATCTTTTTTTTTATTTATCTTATGAGAAAGGCTTTCTTCCCAA  
CGTAAATCTTTGAGAACTTTAAATGTAACAACCTTCAATTGAATGGTTACAAGCCCT  
ACCCCCTAGTG

TOL1\_1

ATTATTAGACAAGAAAGGGGGGAAAAAGAAGCTTTTGGAACCTTAGGAATAATTT  
ATGCCATGATAGCTATCGGATTATTAGGATTCGTAGTTTGAGCTCACCATATATT  
TACAGTAGGGATAGATGTAGATACCCGAGCTTACTTCACTTCAGCAACTATAATT  
ATTGCGGTTCCAACCTGGGATTAAAGTCTTTAGATGACTAGCCACCTTTCATGGAA  
CTCAAATTTTAAATAGACCAGTAACCCTGTGAGCTTTAGGTTTTGTATTTTTATTT  
ACAGTAGGAGGATTAACAGGGGTAATTTTAGCTAATTCTTCAATTGATATTATTCT  
TCACGATACTTACTATGTAGTAGCTCATTTCCTACTATGTTCTTTCTATAGGAGCTG  
TATTTGCAATTATAGCCGGAATTGTCCAATGATTCCCATTATTTACCGGACTAAC  
CTTAAATAATTTTTTTTTAAAAACCCAATTTACTATATTTTTAGGTGTAAATTTA  
ACATTTTTTCCCAACACTTTTTAGGGCTAAGAGGAATGCCTCGGCGATATTCGG  
ATTATCCAGATGCTTTCCTACTATCTGAAATGCCATTTTCATCTATTGGTTCCATTATT

TCTCTCACAGAATTATCTTTTTTTTATTTATCTTATGAGAAAGGCTTTCTTCCCAA  
CGTAAATCTTTGAGAACTTTAAATGTAACAACCTTCAATTGAATGGTTACAAGCCCT  
ACCCCTAGTG

TOL5

ATTATTAGACAAGAAAGGGGGGAAAAAAGAAGCTTTTGGAACCTTAGGAATAATTT  
ATGCCATGATAGCTATCGGATTATTAGGATTCGTAGTTTGAGCTCACCATATATT  
TACAGTAGGGATAGATGTAGATACCCGAGCTTACTTCACTTCAGCAACTATAATT  
ATTGCGGTTCCAACCTGGGATTAAGTCTTTAGATGACTAGCCACCTTTTCATGGAA  
CTCAAATTTTAAATAGACCAGTAACCCTGTGAGCTTTAGGTTTTGTATTTTTATTT  
ACAGTAGGAGGATTAACAGGGGTAATTTTAGCTAATTCTTCAATTGATATTATTCT  
TCACGATACTTACTATGTAGTAGCTCATTTTCACTATGTTCTTTCTATAGGAGCTG  
TATTTGCAATTATAGCCGGAATTGTCCAATGATTCCCATTATTTACCGGACTAAC  
CTTAAATAATTTTTTTTTTAAAAACCCAATTTATTACTATATTTTTAGGTGTAAATTTA  
ACATTTTTTCCCAACACTTTTTAGGGCTAAGAGGAATGCCTCGGCGATATTCGG  
ATTATCCAGATGCTTTCCTACTATCTGAAATGCCATTTTCATCTATTGGTTCCATTATT  
TCTCTCACAGAATTATCTTTTTTTTATTTATCTTATGAGAAAGGCTTTCTTCCCAA  
CGTAAATCTTTGAGAACTTTAAATGTAACAACCTTCAATTGAATGGTTACAAGCCCT  
ACCCCTAGTG

VIC10

ATTATTAGACAAGAAAGGGGGGAAAAAAGAAGCTTTTGGAACCTTAGGAATAATTT  
ATGCCATGATAGCTATCGGATTATTAGGATTCGTAGTTTGAGCTCACCATATATT  
TACAGTAGGGATAGATGTAGATACCCGAGCTTACTTCACTTCAGCAACTATAATT  
ATTGCGGTTCCAACCTGGGATTAAGTCTTTAGATGACTAGCCACCTTTTCATGGAA  
CTCAAATTTTAAATAGACCAGTAACCCTGTGAGCTTTAGGTTTTGTATTTTTATTT  
ACAGTAGGAGGATTAACAGGGGTAATTTTAGCTAATTCTTCAATTGATATTATTCT  
TCACGATACTTACTATGTAGTAGCTCATTTTCACTATGTTCTTTCTATAGGAGCTG  
TATTTGCAATTATAGCCGGAATTGTCCAATGATTCCCATTATTTACCGGACTAAC  
CTTAAATAATTTTTTTTTTAAAAACCCAATTTATTACTATATTTTTAGGTGTAAATTTA  
ACATTTTTTCCCAACACTTTTTAGGGCTAAGAGGAATGCCTCGGCGATATTCGG  
ATTATCCAGATGCTTTCCTACTATCTGAAATGCCATTTTCATCTATTGGTTCCATTATT  
TCTCTCACAGAATTATCTTTTTTTTATTTATCTTATGAGAAAGGCTTTCTTCCCAA  
CGTAAATCTTTGAGAACTTTAAATGTAACAACCTTCAATTGAATGGTTACAAGCCCT  
ACCCCTAGTG

XAN4

ATTATTAGACAAGAAAGGGGGGAAAAAAGAAGCTTTTGGAACCTTAGGAATAATTT  
ATGCCATGATAGCTATCGGATTATTAGGATTCGTAGTTTGAGCTCACCATATATT  
TACAGTAGGGATAGATGTAGATACCCGAGCTTACTTCACTTCAGCAACTATAATT  
ATCGCGGTTCCAACCTGGGATTAAGTCTTTAGGTGACTAGCCACCTTTTCATGGA  
ACTCAAATTTTAAATAGACCAGTAACCCTGTGAGCTTTAGGTTTTGTATTTTTATT  
TACAGTAGGAGGATTAACAGGGGTAATTTAGCTAATTCTTCAATTGATATTATTC  
TTCACGATACTTACTATGTAGTAGCTCATTTTCACTATGTTCTTTCTATAGGAGCT  
GTATTTGCAATTATAGCCGGAATTGTCCAATGATTCCCATTATTTACTGGACTAA  
CCTTAAATAATTTTTTTTTTAAAAACCCAATTTATTACTATATTTTTAGGTGTAAATTT  
AACATTTTTTCTCAACACTTTTTAGGGCTAAGAGGAATGCCTCGGCGATATTCG  
GATTATCCAGATGCTTTTCGCTATCTGAAATGCCATTTTCATCTATTGGTTCCATTATT  
TTCTCTCACAGAATTATCTTTTTTTTATTTATCTTATGAGAAAGGCTTTCTTCCCAA  
ACGTAATCTTTGAGAACTTTAAATGTAACAACCTTCAATTGAATGGTTACAAGCC  
CTACCCCTAGTG

XAX2

ATTATTAGACAAGAAAGGGGGGAAAAAAGAAGCTTTTGGAACCTTAGGAATAATTT

ATGCCATGATAGCTATCGGATTATTAGGATTCGTAGTTTGAGCTCACCATATATT  
TACAGTAGGGATAGATGTAGATACCCGAGCTTACTTCACTTCAGCAACTATAATT  
ATTGCGGTTCCAACCTGGGATTAAGTCTTTAGATGACTAGCCACCTTTCATGGAA  
CTCAAATTTTAAATAGACCAGTAACCCTGTGAGCTTTAGGTTTTGTATTTTTATTT  
ACAGTAGGAGGATTAACAGGGGTAATTTTAGCTAATTCTTCAATTGATATTATTCT  
TCACGATACTTACTATGTAGTAGCTCATTTCCTATGTTCTTTCTATAGGAGCTG  
TATTTGCAATTATAGCCGGAATTGTCCAATGATTCCCATTATTTACCGGACTAAC  
CTTAAATAATTTTTTTTTTAAAAACCCAATTTATTACTATATTTTTTAGGTGTAAATTTA  
ACATTTTTTCCCAACACTTTTTAGGGCTAAGAGGAATGCCTCGGCGATATTCGG  
ATTATCCAGATGCTTTCCTATCTGAAATGCCATTTTCATCTATTGGTTCCATTATT  
TCTCTCACAGAATTATCTTTTTTTTTATTTATCTTATGAGAAAGGCTTTCTTCCCAA  
CGTAAATCTTTGAGAACTTTAAATGTAACAACCTTCAATTGAATGGTTACAAGCCCT  
ACCCCTAGTG

MEX\_SFP

ATTATTAGACAAGAAAGGGGGGAAAAAAGAAGCTTTTGGAACCTTAGGAATAATTT  
ATGCCATAATAGCTATCGGATTATTAGGATTCGTAGTTTGAGCTCACCATATATTT  
ACAGTAGGGATAGATGTAGATACCCGAGCTTACTTCACTTCAGCAACTATAATTA  
TTGCGGTTCCAACCTGGGATTAAGTCTTTAGATGACTAGCCACCTTTCATGGAAC  
TCAAATTTTAAATAGACCAGTAACCCTGTGAGCTTTAGGTTTTGTATTTTTATTTA  
CAGTAGGAGGATTAACAGGGGTAATTTTAGCTAATTCTTCAATTGATATTATTCTT  
CACGATACTTACTATGTAGTAGCTCATTTCCTATGTTCTTTCTATAGGAGCTGT  
ATTTGCAATTATAGCCGGAATTGTCCAATGATTCCCATTATTTACTGGACTAACCT  
TAAATAATTTTTTTTTTAAAAACCCAATTTATTACTATATTTTTAGGTGTAAATTTAAC  
ATTTTTTCTCAACACTTTTTAGGGCTAAGAGGAATGCCTCGGCGATATTCGGAT  
TATCCAGATGCTTTCCTATCTGAAATGCCATTTTCATCTATTGGTTCCATTATTTCT  
TCTCACAGAATTATCTTTTTTTTTATTTATCTTATGAGAAAGGCTTTCTTCCCAAC  
GTAAATCTTTGAGAACTTTAAATGTAACAACCTTCAATTGAATGGTTACAAGCCCTA  
CCCCCTAGTG

MEX\_COE\_2

ATTATTAGACAAGAAAGGGGGGAAAAAAGAACCTTTTGGAACCTTAGGAATAATTT  
ATGCCATAATAGCTATCGGATTATTAGGATTCGTAGTTTGAGCTCACCATATATTT  
ACAGTAGGGATAGATGTAGATACCCGAGCTTACTTCACTTCAGCAACTATAATTA  
TTGCGGTTCCAACCTGGGATTAAGTCTTTAGATGACTAGCCACCTTTCATGGAAC  
TCAAATTTTAAATAGACCAGTAACCCTGTGAGCTTTAGGTTTTGTATTTTTATTTA  
CAGTAGGAGGATTAACAGGGGTAATTTTAGCTAATTCTTCAATTGATATTATTCTT  
CACGATACTTACTATGTAGTAGCTCATTTCCTATGTTCTTTCTATAGGAGCTGT  
ATTTGCAATTATAGCCGGAATTGTCCAATGATTCCCATTATTTACTGGACTAACCT  
TAAATAATTTTTTTTTTAAAAACCCAATTTATTACTATATTTTTAGGTGTAAATTTAAC  
ATTTTTTCTCAACACTTTTTAGGGCTAAGAGGAATGCCTCGGCGATATTCGGAT  
TATCCAGATGCTTTCCTATCTGAAATGCCATTTTCATCTATTGGTTCCATTATTTCT  
TCTCACAGAATTATCTTTTTTTTTATTTATCTTATGAGAAAGGCTTTCTTCCCAAC  
GTAAATCTTTGAGAACTTTAAATGTAACAACCTTCAATTGAATGGTTACAAGCCCTA  
CCCCCTAGTG

MEX\_SAG\_5

ATTATTAGACAAGAAAGGGGGGAAAAAAGAAGCTTTTGGAACCTTAGGAATAATTT  
ATGCCATAATAGCTATCGGATTATTAGGATTCGTAGTTTGAGCTCACCATATATTT  
ACAGTAGGGATAGATGTAGATACCCGAGCTTACTTCACTTCAGCAACTATAATTA  
TTGCGGTTCCAACCTGGGATTAAGTCTTTAGATGACTAGCCACCTTTCATGGAAC  
TCAAATTTTAAATAGACCAGTAACCCTGTGAGCTTTAGGTTTTGTATTTTTATTTA  
CAGTAGGAGGATTAACAGGGGTAATTTTAGCTAATTCTTCAATTGATATTATTCTT

CACGATACTTACTATGTAGTAGCTCATTTCCTACTATGTTCTTTCTATAGGAGCTGT  
ATTTGCAATTATAGCCGGAATTGTCCAATGATTCCCATTATTTACTGGGCTAACCC  
TTAAATAATTTTTTTTTTAAAAACCCAATTTATTACTATATTTTTAGGTGTAAATTTAA  
CATTTTTTCTCAACACTTTTTAGGGCTAAGAGGAATGCCTCGGCGATATTCGGA  
TTATCCAGATGCTTTCACTATCTGAAATGCCATTTTCATCTATTGGTTCCATTATTT  
CTCTCACAAGAATTATCTTTTTTTTATTTATCTTATGAGAAAGGCTTTCTTCCCAA  
CGTAAATCTTTGAGAACTTTAAATGTAACAACCTTCAATTGAATGGTTACAAGCCCT  
ACCCCTAGTG

MEX\_SCA

ATTATTAGACAAGAAAGGGGGGAAAAAGAAGCTTTTGGAACCTTAGGAATAATTT  
ATGCCATAATAGCTATCGGATTATTAGGATTCGTAGTTTGAGCTCACCATATATTT  
ACAGTAGGGATAGATGTAGATACCCGAGCTTACTTCACTTCAGCACCTATGATTA  
TTGCGGTTCCAACCTGGGATTAAGTCTTTAGATGACTAGCCACCTTTTCATGGAAC  
TCAAATTTTAAATAGACCAGTAACCCTGTGAGCTTTAGGTTTTGTATTTTTATTTA  
CAGTAGGAGGATTAACAGGGGTAAATTTAGCTAATTCTTCAATTGATATTATTCTT  
CACGATACTTACTATGTAGTAGCTCATTTCCTACTATGTTCTTTCTATAGGAGCTGT  
ATTTGCAATTATAGCCGGAATTGTCCAATGATTCCCATTATTTACTGGACTAACCT  
TAAATAATTTTTTTTTTAAAAACCCAATTTATTACTATATTTTTAGGTGTAAATTTAAC  
ATTTTTTCTCAACACTTTTTAGGGCTAAGAGGAATGCCTCGGCGATATTCGGAT  
TATCCAGATGCTTTCACTATCTGAAATGCCATTTTCATCTATTGGTTCCATTATTT  
TCTCACAAGAATTATCTTTTTTTTATTTATCTTATGAGAAAGGCTTTCTTCCCAA  
GTAATCTTTGAGAACTTTAAATGTAACAACCTTCAATTGAATGGTTACAAGCCCTA  
CCCCCTAGTG

MEX\_SJS\_2

ATTATTAGACAAGAAAGGGGGGAAAAAGAAGCTTTTGGAACCTTAGGAATAATTT  
ATGCCATAATAGCTATCGGATTATTAGGATTCGTAGTTTGAGCTCACCATATATTT  
ACAGTAGGGATAGATGTAGATACCCGAGCTTACTTCACTTCAGCAACTATAATTA  
TTGCGGTTCCAACCTGGAATTAAGTCTTTAGATGACTAGCCACCTTTTCATGGAAC  
TCAAATTTTAAATAGACCAGTAACCCTGTGAGCTTTAGGTTTTGTATTTTTATTTA  
CAGTAGGAGGATTAACAGGGGTAAATTTAGCTAATTCTTCAATTGATATTATTCTT  
CACGATACTTACTATGTAGTAGCTCATTTCCTACTATGTTCTTTCTATAGGAGCTGT  
ATTTGCAATTATAGCCGGAATTGTCCAATGATTCCCATTATTTACTGGACTAACCT  
TAAATAATTTTTTTTTTAAAAACCCAATTTATTACTATATTTTTAGGTGTAAATTTAAC  
ATTTTTTCTCAACACTTTTTAGGGCTAAGAGGAATGCCTCGGCGATATTCGGAT  
TATCCAGATGCTTTCACTATCTGAAATGCCATTTTCATCTATTGGTTCCATTATTT  
TCTCACAAGAATTATCTTTTTTTTATTTATCTTATGAGAAAGGCTTTCTTCCCAA  
GTAATCTTTGAGAACTTTAAATGTAACAACCTTCAATTGAATGGTTACAAGCCCTA  
CCCCCTAGTG

MEX\_STO

ATTATTAGACAAGAAAGGGGGGAAAAAGAAGCTTTTGGAACCTTAGGAATAATTT  
ATGCCATAATAGCTATCGGATTATTAGGATTCGTAGTTTGAGCTCACCATATATTT  
ACAGTAGGGATAGATGTAGATACCCGAGCTTACTTCACTTCAGCAACTATAATTA  
TTGCGGTTCCAACCTGGGATTAAGTCTTTAGATGACTAGCCACCTTTTCATGGAAC  
TCAAATTTTAAATAGACCAGTAACCCTGTGAGCTTTAGGTTTTGTATTTTTATTTA  
CAGTAGGAGGATTAACAGGGGTAAATTTAGCTAATTCTTCAATTGATATTATTCTT  
CACGATACTTACTATGTAGTAGCTCATTTCCTACTATGTTCTTTCTATAGGAGCTGT  
ATTTGCAATTATAGCCGGAATTGTCCAATGATTCCCATTATTTACTGGACTAACCT  
TAAATAATTTTTTTTTTAAAAACCCAATTTATTACTATATTTTTAGGTGTAAATTTAAC  
ATTTTTTCTCAACACTTTTTAGGGCTAAGAGGAATGCCTCGGCGATATTCGGAT  
TATCCAGATGCTTTCACTATCTGAAATGCCATTTTCATCTATTGGTTCCATTATTT

TCTCACAAGAATTATCTTTTTTTTTATTTATCTTATGAGAAAGGCTTTCTTCCCAAC  
GTAATCTTTGAGAACTTTAAATGTAACAACCTTCAATTGAATGGTTACAAGCCCTA  
CCCCCTAGTG

MEX\_TLA\_1

ATTATTAGACAAGAAAGGGGGGAAAAAGAAGCTTTTGGAACCTTAGGAATAATTT  
ATGCCATAATAGCTATCGGATTATTAGGATTCGTAGTTTGAGCTCACCATATATTT  
ACAGTAGGGATAGATGTAGATACCCGAGCTTACTTCACTTCAGCACCTATGATTA  
TTGCGGTTCCAACCTGGGATTAAGTCTTTAGATGACTAGCCACCTTTTCATGGAAC  
TCAAATTTTAAATAGACCAGTAACCCTGTGAGCTTTAGGTTTTGTATTTTTATTTA  
CAGTAGGAGGATTAACAGGGGTAAATTTAGCTAATTCTTCAATTGATATTATTCTT  
CACGATACTTACTATGTAGTAGCTCATTTTTCACTATGTTCTTTCTATAGGAGCTGT  
ATTTGCAATTATAGCCGGAATTGTCCAATGATTCCCATTATTTACTGGACTAACCT  
TAAATAATTTTTTTTTTAAAAACCCAATTTATTACTATATTTTTAGGTGTAAATTTAAC  
ATTTTTTCTCAACACTTTTTAGGGCTAAGAGGAATGCCTCGGCGATATTCGGAT  
TATCCAGATGCTTTCACTATCTGAAATGCCATTTTCATCTATTGGTTCCATTATTTT  
TCTCACAAGAATTATCTTTTTTTTTATTTATCTTATGAGAAAGGCTTTCTTCCCAAC  
GTAATCTTTGAGAACTTTAAATGTAACAACCTTCAATTGAATGGTTACAAGCCCTA  
CCCCCTAGTG

MEX\_XOT\_3

ATTATTAGACAAGAAAGGGGGGAAAAAGAAGCTTTTGGAACCTTAGGAATAATTT  
ATGCCATGATAGCTATCGGATTATTAGGATTCGTAGTTTGAGCTCACCATATATT  
TACAGTAGGGATAGATGTAGATACCCGAGCTTACTTCACTTCAGCAACTATAATT  
ATTGCGGTTCCAACCTGGGATTAAGTCTTTAGATGACTAGCCACCTTTTCATGGA  
CTCAAATTTTAAATAGACCAGTAACCCTGTGAGCTTTAGGCTTTGTATTTTTATTT  
ACAGTAGGAGGATTAACAGGGGTAAATTTAGCTAATTCTTCAATTGATATTATTCT  
TCACGATACTTACTATGTAGTAGCTCATTTTTCACTATGTTCTTTCTATAGGAGCTG  
TATTTGCAATTATAGCCGGAATTGTCCAATGATTTCCATTATTTACTGGACTAACCT  
TTAAATAATTTTTTTTTTAAAAACCCAATTTATTACTATATTTTTAGGTGTAAATTTAA  
CATTTTTTCTCAACACTTTTTAGGGCTAAGAGGAATGCCTCGGCGATATTCGGA  
TTATCCAGATGCTTTCACTATCTGAAATGCCATTTTCATCTATTGGTTCCATTATTT  
CTCTCACAAGAATTATCTTTTTTTTTATTTATCTTATGAGAAAGGCTTTCTTCCCAA  
CGTAAATCTTTGAGAACTTTAAATGTAACAACCTTCAATTGAATGGTTACAAGCCCT  
ACCCCTAGTG

MEX\_MAL\_1

ATTATTAGACAAGAAAGGGGGGAAAAAGAAGCTTTTGGAACCTTAGGAATAATTT  
ATGCCATAATAGCTATCGGATTATTAGGATTCGTAGTTTGAGCTCACCATATATTT  
ACAGTAGGGATAGATGTAGATACCCGAGCTTACTTCACTTCAGCAACTATAATTA  
TTGCGGTTCCAACCTGGGATTAAGTCTTTAGATGACTAGCCACCTTTTCATGGAAC  
TCAAATTTTAAATAGACCAGTAACCCTGTGAGCTTTAGGTTTTGTATTTTTATTTA  
CAGTAGGAGGATTAACAGGGGTAAATTTAGCTAATTCTTCAATTGATATTATTCTT  
CACGATACTTACTATGTAGTAGCTCATTTTTCACTATGTTCTTTCTATAGGAGCTGT  
ATTTGCAATTATAGCCGGAATTGTCCAATGATTCCCATTATTTACTGGACTAACCT  
TAAATAATTTTTTTTTTAAAAACCCAATTTATTACTATATTTTTAGGTGTAAATTTAAC  
ATTTTTTCTCAACACTTTTTAGGGCTAAGAGGAATGCCTCGGCGATATTCGGAT  
TATCCAGATGCTTTCACTATCTGAAATGCCATTTTCATCTATTGGTTCCATTATTTT  
TCTCACAAGAATTATCTTTTTTTTTATTTATCTTATGAGAAAGGCTTTCTTCCCAAC  
GTAATCTTTGAGAACTTTAAATGTAACAACCTTCAATTGAATGGTTACAAGCCCTA  
CCCCCTAGTG

MEX\_MAL\_2

ATTATTAGACAAGAAAGGGGGGAAAAAGAAGCTTTTGGAACCTTAGGAATAATTT

ATGCCATAATAGCTATGGGATTATTAGGATTCGTCGTTTGAGCTCACCATATATT  
TACAGTAGGGATAGATGTAGATACCCGAGCTTACTTCACTTCAGCAACTATAATT  
ATTGCGGTTCCAACCTGGGATTAAAGTCTTTAGATGACTAGCCACCTTTCATGGAA  
CTCAAATTTTAAATAGACCAGTAACCCTGTGAGCTTTAGGTTTTGTATTTTTATTT  
ACAGTAGGAGGATTAACAGGGGTAATTTTAGCTAATTCTTCAATTGATATTATTCT  
TCACGATACTTACTATGTAGTAGCTCATTTCCTTCACTATGTTCTTTCTATAGGAGCTG  
TATTTGCAATTATAGCCGGAATTGTCCAATGATTCCCATTATTTACTGGACTAACCT  
TTAAATAATTTTTTTTTTAAAAACCCAATTTATTACTATATTTTTAGGTGTAAATTTAA  
CATTTTTTCTCAACACTTTTTAGGGCTAAGAGGAATGCCTCGGCGATATTCGGA  
TTATCCAGATGCTTTCCTATCTGAAATGCCATTTTCATCCATTGTTCCATTATTT  
CTCTCACAAGAATTATCTTTTTTTTTATTTATCCTATGAGAAAGGCTTTCTTCCCAA  
CGTAAATCTTTGAGAACTTTAAATGTAACAACCTTCAATTGAATGGTTACAAGCCCT  
ACCCCTAGTG

MEX\_OCU\_1

ATTATTAGACAAGAAAGGGGGGAAAAAAGAAGCTTTTGGAACCTTAGGAATAATTT  
ATGCCATAATAGCTATCGGATTATTAGGATTCGTAGTTTGAGCTCACCATATATTT  
ACAGTAGGGATAGATGTAGATACCCGAGCTTACTTCACTTCAGCAACTATAATTA  
TTGCGGTTCCAACCTGGGATTAAAGTCTTTAGATGACTAGCCACCTTTCATGGAAC  
TCAAATTTTAAATAGACCAGTAACCCTGTGAGCTTTAGGTTTTGTATTTTTATTTA  
CAGTAGGAGGATTAACAGGGGTAATTTTAGCTAATTCTTCAATTGATATTATTCTT  
CACGATACTTACTATGTAGTAGCTCATTTCCTTCACTATGTTCTTTCTATAGGAGCTGT  
ATTTGCAATTATAGCCGGAATTGTCCAATGATTCCCATTATTTACTGGACTAACCT  
TAAATAATTTTTTTTTTAAAAACCCAATTTATTACTATATTTTTAGGTGTAAATTTAAC  
ATTTTTTCTCAACACTTTTTAGGGCTAAGAGGAATGCCTCGGCGATATTCGGAT  
TATCCAGATGCTTTCCTATCTGAAATGCCATTTTCATCTATTGGTTCCATTATTTCT  
TCTCACAAGAATTATCTTTTTTTTTATTTATCCTTATGAGAAAGGCTTTCTTCCCAA  
GTAAATCTTTGAGAACTTTAAATGTAACAACCTTCAATTGAATGGTTACAAGCCCTA  
CCCCCTAGTG

MEX\_OCU\_2

ATTATTAGACAAGAAAGGGGGGAAAAAAGAAGCTTTTGGAACCTTAGGAATAATTT  
ATGCCATAATAGCTATCGGATTATTAGGATTCGTAGTTTGAGCTCACCATATATTT  
ACAGTAGGGATAGATGTAGATACCCGAGCTTACTTCACTTCAGCAACTATAATTA  
TTGCGGTTCCAACCTGGGATTAAAGTCTTTAGATGACTAGCCACCTTTCATGGAAC  
TCAAATTTTAAATAGACCAGTAACCCTGTGAGCTTTAGGTTTTGTATTTTTATTTA  
CAGTAGGAGGATTAACAGGGGTAATTTTAGCTAATTCTTCAATTGATATTATTCTT  
CACGATACTTACTATGTAGTAGCTCATTTCCTTCACTATGTTCTTTCTATAGGAGCTGT  
ATTTGCAATTATAGCCGGAATTGTCCAATGATTCCCATTATTTACTGGACTAACCT  
TAAATAATTTTTTTTTTAAAAACCCAATTTATTACTATATTTTTAGGTGTAAATTTAAC  
ATTTTTTCTCAACACTTTTTAGGGCTAAGAGGAATGCCTCGGCGATATTCGGAT  
TATCCAGATGCTTTCCTATCTGAAATGCCATTTTCATCTATTGGTTCCATTATTTCT  
TCTCACAAGAATTATCTTTTTTTTTATTTATCCTTATGAGAAAGGCTTTCTTCCCAA  
GTAAATCTTTGAGAACTTTAAATGTAACAACCTTCAATTGAATGGTTACAAGCCCTA  
CCCCCTAGTG

MEX\_SAG\_1

ATTATTAGACAAGAAAGGGGGGAAAAAAGAAGCTTTTGGAACCTTAGGAATAATTT  
ATGCCATAATAGCTATCGGATTATTAGGATTCGTAGTTTGAGCTCACCATATATTT  
ACAGTAGGGATAGATGTAGATACCCGAGCTTACTTCACTTCAGCAACTATAATTA  
TTGCGGTTCCAACCTGGGATTAAAGTCTTTAGATGACTAGCCACCTTTCATGGAAC  
TCAAATTTTAAATAGACCAGTAACCCTGTGAGCTTTAGGTTTTGTATTTTTATTTA  
CAGTAGGAGGATTAACAGGGGTAATTTTAGCTAATTCTTCAATTGATATTATTCTT



CACGATACTTACTATGTAGTAGCTCATTTCCTACTATGTTCTTTCTATAGGAGCTGT  
ATTTGCAATTATAGCCGGAATTGTCCAATGATTCCCATTATTTACTGGGCTAACCC  
TTAAATAATTTTTTTTTTAAAAACCCAATTTATTACTATATTTTTAGGTGTAAATTTAA  
CATTTCCTCAACACTTTTTAGGGCTAAGAGGAATGCCTCGGCGATATTCGGA  
TTATCCAGATGCTTTCACTATCTGAAATGCCATTTATCTATTGGTTCCATTATTT  
CTCTCACAAGAATTATCTTTTTTTTATTTATCTTATGAGAAAGGCTTTCTTCCCAA  
CGTAAATCTTTGAGAACTTTAAATGTAACAACCTTCAATTGAATGGTTACAAGCCCT  
ACCCCTAGTG

MEX\_SAG\_2

ATTATTAGACAAGAAAGGGGGGAAAAAGAAGCTTTTGGAACCTTAGGAATAATTT  
ATGCCATAATAGCTATCGGATTATTAGGATTCGTAGTTTGAGCTCACCATATATTT  
ACAGTAGGGATAGATGTAGATACCCGAGCTTACTTCACTTCAGCAACTATAATTA  
TTGCGGTTCCAACCTGGGATTAAGTCTTTAGATGACTAGCCACCTTTTATGGAAC  
TCAAATTTTAAATAGACCAGTAACCCTGTGAGCTTTAGGTTTTGTATTTTTATTTA  
CAGTAGGAGGATTAACAGGGGTAAATTTAGCTAATTCTTCAATTGATATTATTCTT  
CACGATACTTACTATGTAGTAGCTCATTTCCTACTATGTTCTTTCTATAGGAGCTGT  
ATTTGCAATTATAGCCGGAATTGTCCAATGATTCCCATTATTTACTGGGCTAACCC  
TTAAATAATTTTTTTTTTAAAAACCCAATTTATTACTATATTTTTAGGTGTAAATTTAA  
CATTTCCTCAACACTTTTTAGGGCTAAGAGGAATGCCTCGGCGATATTCGGA  
TTATCCAGATGCTTTCACTATCTGAAATGCCATTTATCTATTGGTTCCATTATTT  
CTCTCACAAGAATTATCTTTTTTTTATTTATCTTATGAGAAAGGCTTTCTTCCCAA  
CGTAAATCTTTGAGAACTTTAAATGTAACAACCTTCAATTGAATGGTTACAAGCCCT  
ACCCCTAGTG

MEX\_SJC\_1

ATTATTAGACAAGAAAGGGGGGAAAAAGAAGCTTTTGGAACCTTAGGAATAATTT  
ATGCCATAATAGCTATCGGATTATTAGGATTCGTAGTTTGAGCTCACCATATATTT  
ACAGTAGGGATAGATGTAGATACCCGAGCTTACTTCACTTCAGCAACTATAATTA  
TTGCGGTTCCAACCTGGGATTAAGTCTTTAGATGACTAGCCACCTTTTATGGAAC  
TCAAATTTTAAATAGACCAGTAACCCTGTGAGCTTTAGGTTTTGTATTTTTATTTA  
CAGTAGGAGGATTAACAGGGGTAAATTTAGCTAATTCTTCAATTGATATTATTCTT  
CACGATACTTACTATGTAGTAGCTCATTTCCTACTATGTTCTTTCTATAGGAGCTGT  
ATTTGCAATTATAGCCGGAATTGTCCAATGATTCCCATTATTTACTGGACTAACCT  
TAAATAATTTTTTTTTTAAAAACCCAATTTATTACTATATTTTTAGGTGTAAATTTAAC  
ATTTTTTCTCAACACTTTTTAGGGCTAAGAGGAATGCCTCGGCGATATTCGGAT  
TATCCAGATGCTTTCACTATCTGAAATGCCATTTATCTATTGGTTCCATTATTTCT  
TCTCACAAGAATTATCTTTTTTTTATTTATCTTATGAGAAAGGCTTTCTTCCCAA  
GTAATCTTTGAGAACTTTAAATGTAACAACCTTCAATTGAATGATTACAAGCCCTA  
CCCCCTAGTG

MEX\_SJC\_2

ATTATTAGACAAGAAAGGGGGGAAAAAGAAGCTTTTGGAACCTTAGGAATAATTT  
ATGCCATAATAGCTATCGGATTATTAGGATTCGTAGTTTGAGCTCACCATATATTT  
ACAGTAGGGATAGATGTAGATACCCGAGCTTACTTCACTTCAGCAACTATAATTA  
TTGCGGTTCCAACCTGGGATTAAGTCTTTAGATGACTAGCCACCTTTTATGGAAC  
TCAAATTTTAAATAGACCAGTAACCCTGTGAGCTTTAGGTTTTGTATTTTTATTTA  
CAGTAGGAGGATTAACAGGGGTAAATTTAGCTAATTCTTCAATTGATATTATTCTT  
CACGATACTTACTATGTAGTAGCTCATTTCCTACTATGTTCTTTCTATAGGAGCTGT  
ATTTGCAATTATAGCCGGAATTGTCCAATGATTCCCATTATTTACTGGACTAACCT  
TAAATAATTTTTTTTTTAAAAACCCAATTTATTACTATATTTTTAGGTGTAAATTTAAC  
ATTTTTTCTCAACACTTTTTAGGGCTAAGAGGAATGCCTCGGCGATATTCGGAT  
TATCCAGATGCTTTCACTATCTGAAATGCCATTTATCTATTGGTTCCATTATTTCT

TCTCACAAGAATTATCTTTTTTTTTATTTATCTTATGAGAAAGGCTTTCTTCCCAAC  
GTAATCTTTGAGAACTTTAAATGTAACAACCTTCAATTGAATGGTTACAAGCCCTA  
CCCCCTAGTG

MEX\_SJC\_3

ATTATTAGACAAGAAAGGGGGGAAAAAAGAAGCTTTTGGAACCTTAGGAATAATTT  
ATGCCATAATAGCTATCGGATTATTAGGATTCGTAGTTTGAGCTCACCATATATTT  
ACAGTAGGGATAGATGTAGATACCCGAGCTTACTTCACTTCAGCAACTATAATTA  
TTGCGGTTCCAACCTGGGATTAAGTCTTTAGATGACTAGCCACCTTTTCATGGAAC  
TCAAATTTTAAATAGACCAGTAACCCTGTGAGCTTTAGGTTTTGTATTTTTATTTA  
CAGTAGGAGGATTAACAGGGGTAAATTTAGCTAATTCTTCAATTGATATTATTCTT  
CACGATACTTACTATGTAGTAGCTCATTTTTCACTATGTTCTTTCTATAGGAGCTGT  
ATTTGCAATTATAGCCGGAATTGTCCAATGATTCCCATTATTTACTGGACTAACCT  
TAAATAATTTTTTTTTTAAAAACCCAATTTATTACTATATTTTTAGGTGTAAATTTAAC  
ATTTTTTCTCAACACTTTTTAGGGCTAAGAGGAATGCCTCGGCGATATTCGGAT  
TATCCAGATGCTTTCACTATCTGAAATGCCATTTTCATCTATTGGTTCCATTATTTTC  
TCTCACAAGAATTATCTTTTTTTTTATTTATCTTATGAGAAAGGCTTTCTTCCCAAC  
GTAATCTTTGAGAACTTTAAATGTAACAACCTTCAATTGAATGGTTACAAGCCCTA  
CCCCCTAGTG

MEX\_SJS

ATTATTAGACAAGAAAGGGGGGAAAAAAGAACCTTTTGGAACCTTAGGAATAATTT  
ATGCCATAATAGCTATCGGATTATTAGGATTCGTAGTTTGAGCTCACCATATATTT  
ACAGTAGGGATAGATGTAGATACCCGAGCTTACTTCACTTCAGCAACTATAATTA  
TTGCGGTTCCAACCTGGAATTAAGTCTTTAGATGACTAGCCACCTTTTCATGGAAC  
TCAAATTTTAAATAGACCAGTAACCCTGTGAGCTTTAGGTTTTGTATTTTTATTTA  
CAGTAGGAGGATTAACAGGGGTAAATTTAGCTAATTCTTCAATTGATATTATTCTT  
CACGATACTTACTATGTAGTAGCTCATTTTTCACTATGTTCTTTCTATAGGAGCTGT  
ATTTGCAATTATAGCCGGAATTGTCCAATGATTCCCATTATTTACTGGACTAACCT  
TAAATAATTTTTTTTTTAAAAACCCAATTTATTACTATATTTTTAGGTGTAAATTTAAC  
ATTTTTTCTCAACACTTTTTAGGGCTAAGAGGAATGCCTCGGCGATATTCGGAT  
TATCCAGATGCTTTCACTATCTGAAATGCCATTTTCATCTATTGGTTCCATTATTTTC  
TCTCACAAGAATTATCTTTTTTTTTATTTATCTTATGAGAAAGGCTTTCTTCCCAAC  
GTAATCTTTGAGAACTTTAAATGTAACAACCTTCAATTGAATGGTTACAAGCCCTA  
CCCCCTAGTG

MEX\_SJS\_1

ATTATTAGACAAGAAAGGGGGGAAAAAAGAAGCTTTTGGAACCTTAGGAATAATTT  
ATGCCATAATACCTATCGGATTATTAGGATTCGTCTGTTTGAGCTCACCATATATTT  
ACAGTACGGATAGATGTAGATACCCGAGCTTACTTCACTTCAGCAACTATAATTA  
TTGCGGTTCCAACCTGGGATTAAGTCTTTAGATGACTAGCCACCTTTTCATGGAAC  
TCAAATTTTAAATAGACCAGTAACCCTGTGAGCTTTAGGTTTTGTATTTTTATTTA  
CAGTAGGAGGATTAACAGGGGTAAATTTAGCTAATTCTTCAATTGATATTATTCTT  
CACGATACTTACTATGTAGTAGCTCATTTTTCACTATGTTCTTTCTATAGGAGCTGT  
ATTTGCAATTATAGCCGGAATTATCCAATGATTCCCATTATTTACTGGACTAACCT  
TAAATAATTTTTTTTTTAAAAACCCAATTTATTACTATATTTTTAGGTGTAAATTTAAC  
ATTTTTTCTCAACACTTTTTAGGGCTAAGAGGAATGCCTCGGCGATATTCGGAT  
TATCCAGATGCTTTCACTATCTGAAATGCCATTTTCATCCATTGGTTCCATTATTTTC  
TCTCACAAGAATTATCTTTTTTTTTATTTATCTTATGAGAAAGGCTTTCTTCCCAAC  
GTAATCTTTGAGAACTTCAAATGTAACAACCTTCAATTGAATGGTGACAAGCCCT  
ACCCCTAGTG

MEX\_SJS\_3

ATTATTAGACAAGAAAGGGGGGAAAAAAGAAGCTTTTGGAACCTTAGGAATAATTT

ATGCCATAATACCTATCGGATTATTAGGATTCGTCTGTTTGAGCTCACCATATATTT  
ACAGTACGGATAGATGTAGATACCCGAGCTTACTTCACTTCAGCAACTATAATTA  
TTGCGGTTCCAACCTGGGATTAAGTCTTTAGATGACTAGCCACCTTTTCATGGAAC  
TCAAATTTTAAATAGACCAGTAACCCTGTGAGCTTTAGGTTTTGTATTTTTATTTA  
CAGTAGGAGGATTAACAGGGGTAATTTTAGCTAATTCTTCAATTGATATTATTCTT  
CACGATACTTACTATGTAGTAGCTCATTTTCACTATGTTCTTTCTATAGGAGCTGT  
ATTTGCAATTATAGCCGGAATTATCCAATGATTCCCATTATTTACTGGACTAACCT  
TAAATAATTTTTTTTTTAAAAACCCAATTTATTACTATATTTTTAGGTGTAAATTTAAC  
ATTTTTTCCTCAACACTTTTTAGGGCTAAGAGGAATGCCTCGGCGATATTCGGAT  
TATCCAGATGCTTTCCTATCTGAAATGCCATTTTCATCCATTGGTTCCATTATTTT  
TCTCACAAGAATTATCTTTTTTTTTATTTATCTTATGAGAAAGGCTTTCTTCCCAAC  
GTAATCTTTGAGAACTTCAAATGTAACAACCTTCAATTGAATGGTGACAAGCCCT  
ACCCCTAGTG

MEX\_SPT\_1

ATTATTAGACAAGAAAGGGGGGAAAAAAGAAGCTTTTGGAACCTTAGGAATAATTT  
ATGCCATAATAGCTATCGGATTATTAGGATTCGTAGTTTGAGCTCACCATATATTT  
ACAGTAGGGATAGATGTAGATACCCGAGCTTACTTCACTTCAGCAACTATAATTA  
TTGCGGTTCCAACCTGGGATTAAGTCTTTAGATGACTAGCCACCTTTTCATGGAAC  
TCAAATTTTAAATAGACCAGTAACCCTGTGAGCTCTAGGTTTTGTATTTTTATTTA  
CAGTAGGAGGATTAACAGGGGTAATTTTAGCTAATTCTTCAATTGATATTATTCTT  
CACGATACTTACTATGTAGTAGCTCATTTTCACTATGTTCTTTCTATAGGAGCTGT  
ATTTGCAATTATAGCCGGAATTGTCCAATGATTCCCATTATTTACTGGACTAACCT  
TAAATAATTTTTTTTTTAAAAACCCAATTTATTACTATATTTTTAGGTGTAAATTTAAC  
ATTTTTTCCTCAACACTTTTTAGGGCTAAGAGGAATGCCTCGGCGATATTCGGAT  
TATCCAGATGCTTTCCTATCTGAAATGCCATTTTCATCTATTGGTTCCATTATTTT  
TCTCACAAGAATTATCTTTTTTTTTATTTATCTTATGAGAAAGGCTTTCTTCCCAAC  
GTAATCTTTGAGAACTTTAAATGTAACAACCTTCAATTGAATGGTTACAAGCCCTA  
CCCCCTAGTG

MEX\_SPT\_2

ATTATTAGACAAGAAAGGGGGGAAAAAAGAAGCTTTTGGAACCTTAGGAATAATTT  
ATGCCATAATAGCTATCGGATTATTAGGATTCGTAGTTTGAGCTCACCATATATTT  
ACAGTAGGGATAGATGTAGATACCCGAGCTTACTTCACTTCAGCAACTATAATTA  
TTGCGGTTCCAACCTGGGATTAAGTCTTTAGATGACTAGCCACCTTTTCATGGAAC  
TCTAATTTTAAATAGACCAGTAACCCTATGAGCTTTAGGTTTTGTATTTTTATTTAC  
AGTAGGAGGTTTTAACAGGAGTAATTTTAGCTAATTCTTCAATTGATATTATTCTTC  
ACGATACTTACTATGTAGTAGCTCATTTTCACTATGTTCTTTCTATAGGAGCTGTA  
TTTGCAATTATAGCCGGAATTGTCCAATGATTCCCATTATTTACTGGACTAACCTT  
AAATAATTTTTTTTTTAAAAACCCAATTTATTACTATATTTTTAGGTGTAAATTTAACA  
TTTTTTCCTCAACACTTTTTAGGGCTAAGAGGAATGCCTCGGCGATATTCGGATT  
ATCCAGATGCTTTCCTATCTGAAATGCCATTTTCATCTATTGGTTCTATTATTTCT  
CTCACAAGAATTATCTTTTTTTTTATTTATCTTATGAGAAAGGCTTTCTTCCCAACG  
TAAATCTTTGAGAACTTTAAATGTAACAACCTTCAATTGAATGGTTACAAGCCCTAC  
CCCCTAGTG

MEX\_SPT\_3

ATTATTAGACAAGAAAGGGGGGAAAAAAGAAGCTTTTGGAACCTTAGGAATAATTT  
ATGCCATAATAGCTATCGGATTATTAGGATTCGTAGTTTGAGCTCACCATATATTT  
ACAGTAGGGATAGATGTAGATACCCGAGCTTACTTCACTTCAGCAACTATAATTA  
TTGCGGTTCCAACCTGGGATTAAGTCTTTAGATGACTAGCCACCTTTTCATGGAAC  
TCTAATTTTAAATAGACCAGTAACCCTATGAGCTTTAGGTTTTGTATTTTTATTTAC  
AGTAGGAGGTTTTAACAGGAGTAATTTTAGCTAATTCTTCAATTGATATTATTCTTC

ACGATACTTACTATGTAGTAGCTCATTTTTCACTATGTTCTTTCTATAGGAGCTGTA  
TTTGCAATTATAGCCGGAATTGTCCAATGATTCCCATTATTTACTGGACTAACCTT  
AAATAATTTTTTTTTAAAAACCCAATTTATTACTATATTTTTAGGTGTAAATTTAACA  
TTTTTTCCTCAACACTTTTTAGGGCTAAGAGGAATGCCTCGGCGATATTCGGATT  
ATCCAGATGCTTTCCTACTATCTGAAATGCCATTTTCATCTATTGGTTCTATTATTTCT  
CTCACAAGAATTATCTTTTTTTTTATTTATCTTATGAGAAAGGCTTTCTTCCCAACG  
TAAATCTTTGAGAACTTTAAATGTAACAACCTTCAATTGAATGGTTACAAGCCCTAC  
CCCCTAGTG

MEX\_TEP

ATTATTAGACAAGAAAGGGGGGAAAAAGAAGCTTTTGGAACCTTAGGAATAATTT  
ATGCCATAATAGCTATCGGATTATTAGGATTCGTAGTTTGAGCTCACCATATATTT  
ACAGTAGGGATAGATGTAGATACCCGAGCTTACTTCACTTCAGCAACTATAATTA  
TTGCGGTTCCAACCTGGGATTAAGTCTTTAGATGACTAGCCACCTTTCATGGAAC  
TCAAATTTTAAATAGACCAGTAACCCTGTGAGCTTTAGGTTTTGTATTTTTATTTA  
CAGTAGGAGGATTAACAGGGGTAAATTTAGCTAATTCTTCAATTGATATTATTCTT  
CACGATACTTACTATGTAGTAGCTCATTTTTCACTATGTTCTTTCTATAGGAGCTGT  
ATTTGCAATTATAGCCGGAATTGTCCAATGATTCCCATTATTTACTGGACTAACCT  
TAAATAATTTTTTTTTAAAAACCCAATTTATTACTATATTTTTAGGTGTAAATTTAAC  
ATTTTTTTCCTCAACACTTTTTAGGGCTAAGAGGAATGCCTCGGCGATATTCGGAT  
TATCCAGATGCTTTCCTACTATCTGAAATGCCATTTTCATCTATTGGTTCCATTATTTCT  
TCTCACAAGAATTATCTTTTTTTTTATTTATCTTATGAGAAAGGCTTTCTTCCCAAC  
GTAATCTTTGAGAACTTTAAATGTAACAACCTTCAATTGAATGGTTACAAGCCCTA  
CCCCCTAGTG

MEX\_TEP\_1

ATTATTAGACAAGAAAGGGGGGAAAAAGAAGCTTTTGGAACCTTAGGAATAATTT  
ATGCCATAATAGCTATCGGATTATTAGGATTCGTAGTTTGAGCTCACCATATATTT  
ACAGTAGGGATAGATGTAGATACCCGAGCTTACTTCACTTCAGCAACTATAATTA  
TTGCGGTTCCAACCTGGGATTAAGTCTTTAGATGACTAGCCACCTTTCATGGAAC  
TCAAATTTTAAATAGACCAGTAACCCTGTGAGCTTTAGGTTTTGTATTTTTATTTA  
CAGTAGGAGGATTAACAGGGGTAAATTTAGCTAATTCTTCAATTGATATTATTCTT  
CACGATACTTACTATGTAGTAGCTCATTTTTCACTATGTTCTTTCTATAGGAGCTGT  
ATTTGCAATTATAGCCGGAATTGTCCAATGATTCCCATTATTTACTGGACTAACCT  
TAAATAATTTTTTTTTAAAAACCCAATTTATTACTATATTTTTAGGTGTAAATTTAAC  
ATTTTTTTCCTCAACACTTTTTAGGGCTAAGAGGAATGCCTCGGCGATATTCGGAT  
TATCCAGATGCTTTCCTACTATCTGAAATGCCATTTTCATCTATTGGTTCCATTATTTCT  
TCTCACAAGAATTATCTTTTTTTTTATTTATCTTATGAGAAAGGCTTTCTTCCCAAC  
GTAATCTTTGAGAACTTTAAATGTAACAACCTTCAATTGAATGGTTACAAGCCCTA  
CCCCCTAGTG

MEX\_TEP\_2

ATTATTAGACAAGAAAGGGGGGAAAAAGAAGCTTTTGGAACCTTAGGAATAATTT  
ATGCCATAATAGCTATCGGATTATTAGGATTCGTAGTTTGAGCTCACCATATATTT  
ACAGTAGGGATAGATGTAGATACCCGAGCTTACTTCACTTCAGCAACTATAATTA  
TTGCGGTTCCAACCTGGGATTAAGTCTTTAGATGACTAGCCACCTTTCATGGAAC  
TCAAATTTTAAATAGACCAGTAACCCTGTGAGCTTTAGGTTTTGTATTTTTATTTA  
CAGTAGGAGGATTAACAGGGGTAAATTTAGCTAATTCTTCAATTGATATTATTCTT  
CACGATACTTACTATGTAGTAGCTCATTTTTCACTATGTTCTTTCTATAGGAGCTGT  
ATTTGCAATTATAGCCGGAATTGTCCAATGATTTCCATTATTTACTGGACTAACCT  
TAAATAATTTTTTTTTAAAAACCCAATTTATTACTATATTTTTAGGTGTAAATTTAAC  
ATTTTTTTCCTCAACACTTTTTAGGGCTAAGAGGAATGCCTCGGCGATATTCGGAT  
TATCCAGATGCTTTCCTACTATCTGAAATGCCATTTTCATCTATTGGTTCCATTATTTCT

TCTCACAAGAATTATCTTTTTTTTTATTTATCTTATGAGAAAGGCTTTCTTCCCAAC  
GTAATCTTTGAGAACTTTAAATGTAACAACCTTCAATTGAATGGTTACAAGCCCTA  
CCCCCTAGTG

MEX\_TLA

ATTATTAGACAAGAAAGGGGGGAAAAAAGAAGCTTTTGGAACCTTAGGAATAATTT  
ATGCCATAATAGCTATCGGATTATTAGGATTCGTAGTTTGAGCTCACCATATATTT  
ACAGTAGGGATAGATGTAGATACCCGAGCTTACTTCACTTCAGCACCTATGATTA  
TTGCGGTTCCAACCTGGGATTAAGTCTTTAGATGACTAGCCACCTTTTCATGGAAC  
TCAAATTTTAAATAGACCAGTAACCCTGTGAGCTTTAGGTTTTGTATTTTTATTTA  
CAGTAGGAGGATTAACAGGGGTAAATTTTAGCTAATTCTTCAATTGATATTATTCTT  
CACGATACTTACTATGTAGTAGCTCATTTTTCACTATGTTCTTTCTATAGGAGCTGT  
ATTTGCAATTATAGCCGGAATTGTCCAATGATTCCCATTATTTACTGGACTAACCT  
TAAATAATTTTTTTTTTAAAAACCCAATTTATTACTATATTTTTAGGTGTAAATTTAAC  
ATTTTTTCTCAACACTTTTTAGGGCTAAGAGGAATGCCTCGGCGATATTCGGAT  
TATCCAGATGCTTTCACTATCTGAAATGCCATTTTCATCTATTGGTTCCATTATTTT  
TCTCACAAGAATTATCTTTTTTTTTATTTATCTTATGAGAAAGGCTTTCTTCCCAAC  
GTAATCTTTGAGAACTTTAAATGTAACAACCTTCAATTGAATGGTTACAAGCCCTA  
CCCCCTAGTG

MEX\_TLA\_2

ATTATTAGACAAGAAAGGGGGGAAAAAAGAAGCTTTTGGACCCTTAGGAATAATTT  
ATCCCTTATTACCTATCGGATTATTAGGATTCGTCTGTTTGAGCTCACCATATCTTT  
ACAGTAGGTATAGCTGTAGATACCCGAGCTTACTTCACTTCAGCAACTATAATTA  
TTGCGGTTCCAACCTGGGATTAAGTCTTTAGATGACTAGCCACCTTTTCATGGAAC  
TCAAATTTTAAATAGACCAGTAACCCTGTGAGCTTTAGGTTTTGTATTTTTATTTA  
CAGTAGGAGGATTAACAGGGGTAAATTTTAGCTAATTCTTCAATTGATATTATTCTT  
CACGATACTTACTATGTAGTAGCTCATTTTTCACTATGTTCTTTCTATAGGAGCTGT  
ATTTGCAATTATAGCCGGAATTAGCCAATGATTCCCATTATTTACTGGACTAACCT  
TTAAATAATTTTTTTTTTAAAAACCCAATTTATTACTATATTTTTAGGTGTAAATTTAA  
CATTTTTTCTCAACACTTTTTAGGGCTAAGAGGAATGCCTCGGCGATATTCGGA  
TTATCCAGATGCTTTCACTACCTGAAATGCCATTTTCATCCATTGGTTCCATTATTT  
CTCTCACAAGAATTATCTTTTTTTTTATTTATCTTATGAGAAAGGCTTTCTTCCCAA  
CGTAAATCTTTGAGAACTTCAAATGTAACAACCTTCAATTGAATGGTGACAAGCCC  
TACCCCTAGTG

MEX\_TLA\_3

ATTATTAGACAAGAAAGGGGGGAAAAAAGAAGCTTTTGGAACCTTAGGAATAATTT  
ATGCCATAATAGCTATCGGATTATTAGGATTCGTAGTTTGAGCTCACCATATATTT  
ACAGTAGGGATAGATGTAGATACCCGAGCTTACTTCACTTCAGCAACTATAATTA  
TTGCGGTTCCAACCTGGGATTAAGTCTTTAGATGACTAGCCACCTTTTCATGGAAC  
TCAAATTTTAAATAGACCAGTAACCCTGTGAGCTTTAGGTTTTGTATTTTTATTTA  
CAGTAGGAGGATTAACAGGGGTAAATTTTAGCTAATTCTTCAATTGATATTATTCTT  
CACGATACTTACTATGTAGTAGCTCATTTTTCACTATGTTCTTTCTATAGGAGCTGT  
ATTTGCAATTATAGCCGGAATTGTCCAATGATTCCCATTATTTACTGGACTAACCT  
TAAATAATTTTTTTTTTAAAAACCCAATTTATTACTATATTTTTAGGTGTAAATTTAAC  
ATTTTTTCTCAACACTTTTTAGGGCTAAGAGGAATGCCTCGGCGATATTCGGAT  
TATCCAGATGCTTTCACTATCTGAAATGCCATTTTCATCTATTGGTTCCATTATTTT  
TCTCACAAGAATTATCTTTTTTTTTATTTATCTTATGAGAAAGGCTTTCTTCCCAAC  
GTAATCTTTGAGAACTTTAAATGTAACAACCTTCAATTGAATGGTTGCAAGCCCT  
ACCCCTAGTG

MEX\_YAU\_1

ATTATTAGACAAGAAAGGGGGGAAAAAAGAAGCTTTTGGAACCTTAGGAATAATTT

ATGCCATGATAGCTATCGGATTATTAGGATTCGTAGTTTGAGCTCACCATATATT  
TACAGTAGGGATAGATGTAGATACCCGAGCTTACTTCACTTCAGCAACTATAATT  
ATTGCGGTTCCAACCTGGGATTAAGTCTTTAGATGGCTAGCCACCTTTCATGGAA  
CTCAAATTTTAAATAGACCAGTAACCCTGTGAGCTTTAGGTTTTGTATTTTTATTT  
ACAGTAGGAGGATTAACAGGGGTAATTTTAGCTAATTCTTCAATTGATATTATTCT  
TCACGATACTTACTATGTAGTAGCTCATTTCCTTCTTCTATAGGAGCTG  
TATTTGCAATTATAGCCGGAATTAGCCAATGATTCCCATTATTTACTGGACTAAC  
CTTAAATAATTTTTTTTTTAAAAACCCAATTTATTACTATATTTTTAGGTGTAAATTTA  
ACATTTTTTCTCAACACTTTTTAGGGCTAAGAGGAATGCCTCGGCGATATTCGG  
ATTATCCAGATGCTTTCCTACTATCTGAAATGCCATTTTCATCTATTGGTTCCATTATT  
TCTCTCACAGAATTATCTTTTTTTTTATTTATCTTATGAGAAAGGCTTTCTTCCCAA  
CGTAAATCTTTGAGAACTTTAAATGTAACAACCTTCAATTGAATGGTTACAAGCCCT  
ACCCCTAGTG

MEX\_YAU\_2

ATTATTAGACAAGAAAGGGGGGAAAAAAGAAGCTTTTGGAACCTTAGGAATAATTT  
ATGCCATAATAGCTATCGGATTATTAGGATTCGTAGTTTGAGCTCACCATATATTT  
ACAGTAGGGATAGATGTAGATACCCGAGCTTACTTCACTTCAGCAACTATAATTA  
TTGCGGTTCCAACCTGGGATTAAGTCTTTAGATGACTAGCCACCTTTCATGGAAC  
TCAAATTTTAAATAGACCAGTAACCCTGTGAGCTTTAGGTTTTGTATTTTTATTTA  
CAGTAGGAGGATTAACAGGGGTAATTTTAGCTAATTCTTCAATTGATATTATTCTT  
CACGATACTTACTATGTAGTAGCTCATTTCCTTCTTCTATAGGAGCTGT  
ATTTGCAATTATAGCCGGAATTGTCCAATGATTCCCATTATTTACTGGACTAACCT  
TAAATAATTTTTTTTTTAAAAACCCAATTTATTACTATATTTTTAGGTGTAAATTTAAC  
ATTTTTTCTCAACACTTTTTAGGGCTAAGAGGAATGCCTCGGCGATATTCGGAT  
TATCCAGATGCTTTCCTACTATCTGAAATGCCATTTTCATCTATTGGTCCATTATTT  
TCTCACAGAATTATCTTTTTTTTTATTTATCTTATGAGAAAGGCTTTCTTCCCAAC  
GTAAATCTTTGAGAACTTTAAATGTAACAACCTTCAATTGAATGGTTACAAGCCCTA  
CCCCCTAGTG

CAM\_YAH

ATTATTAGACAAGAAAGGGGGGAAAAAAGAAGCTTTTGGAACCTTAGGAATAATTT  
ATGCCATGATAGCTATCGGATTATTAGGATTCGTAGTTTGAGCTCTCCATATATT  
TACAGTAGGGATAGATGTAGATACCCGAGCTTACTTCACTTCAGCAACTATGATT  
ATCGCGGTTCCAACCTGGGATTAAGTCTTTAGGTGACTAGCCACCTTTCATGGA  
ACTCAAATTTTAAATAGACCAGTAACCCTGTGAGCTTTAGGTTTTGTATTTTTATT  
TACAGTAGGAGGATTAACAGGGGTAATTTTAGCTAATTCTTCAATTGATATTATTC  
TTCACGATACTTACTATGTAGTAGCTCATTTCCTTCTTCTATAGGAGCT  
GTATTTGCAATTATAGCCGGAATTGTCCAATGATTCCCATTATTTACTGGACTAA  
CCTTAAATAATTTTTTTTTTAAAAACCCAATTTATTACTATATTTTTAGGTGTAAATTT  
AACATTTTTTCTCAACACTTTTTAGGGCTAAGAGGAATGCCTCGGCGATATTCG  
GATTATCCAGATGCTTTCCTACTATCTGAAATGCCATTTTCATCTATTGGTTCCATTAT  
TTCTCTCACAGAATTATCTTTTTTTTTATTTATCTTATGAGAAAGGCTTTCTTCCCA  
ACGTAAATCTTTGAGAACTTTAAATGTAACAACCTTCAATTGAATGGTTACAAGCC  
CTACCCCTAGTG

CAM\_YAH01

ATTATTAGACAAGAAAGGGGGGAAAAAAGAAGCTTTTGGAACCTTAGGAATAATTT  
ATGCCATGATAGCTATCGGATTATTAGGATTCGTAGTTTGAGCTCTCCATATATT  
TACAGTAGGGATAGATGTAGATACCCGAGCTTACTTCACTTCAGCAACTATGATT  
ATCGCGGTTCCAACCTGGGATTAAGTCTTTAGGTGACTAGCCACCTTTCATGGA  
ACTCAAATTTTAAATAGACCAGTAACCCTGTGAGCTTTAGGTTTTGTATTTTTATT  
TACAGTAGGAGGATTAACAGGGGTAATTTTAGCTAATTCTTCAATTGATATTATTC

TTCACGATACTTACTATGTAGTAGCTCATTTTTCACTATGTTCTTTCTATAGGAGCT  
GTATTTGCAATTATAGCCGGAATTGTCCAATGATTCCCATTATTTACTGGACTAA  
CCTTAAATAATTTTTTTTTAAAAACCCAATTTATTACTATATTTTTAGGTGTAAATTT  
AACATTTTTTCTCAACACTTTTTAGGGCTAAGAGGAATGCCTCGGCGATATTCG  
GATTATCCAGATGCTTTCACTATCTGAAATGCCATTTTCATCTATTGGTTCCATTAT  
TTCTCTCACAGAATTATCTTTTTTTTTATTTATCTTATGAGAAAGGCTTTCTTCCCA  
ACGTAATCTTTGAGAACTTTAAATGTAACAACCTTCAATTGAATGGTTACAAGCC  
CTACCCCCTAGTG

CAM\_YAH02

ATTATTAGACAAGAAAGGGGGGAAAAAGAAGCTTTTGGAACCTTAGGAATAATTT  
ATGCCATGATAGCTATCGGATTATTAGGATTCGTAGTTTGAGCTCTCCATATATT  
TACAGTAGGGATAGATGTAGATACCCGAGCTTACTTCACTTCAGCAACTATGATT  
ATCGCGGTTCCAACCTGGGATTAAGTCTTTAGGTGACTAGCCACCTTTTCATGGA  
ACTCAAATTTTAAATAGACCAGTAACCCTGTGAGCTTTAGGTTTTGTATTTTTATT  
TACAGTAGGAGGATTAACAGGGGTAATTTAGCTAATTCTTCAATTGATATTATTC  
TTCACGATACTTACTATGTAGTAGCTCATTTTTCACTATGTTCTTTCTATAGGAGCT  
GTATTTGCAATTATAGCCGGAATTGTCCAATGATTCCCATTATTTACTGGACTAA  
CCTTAAATAATTTTTTTTTAAAAACCCAATTTATTACTATATTTTTAGGTGTAAATTT  
AACATTTTTTCTCAACACTTTTTAGGGCTAAGAGGAATGCCTCGGCGATATTCG  
GATTATCCAGATGCTTTCACTATCTGAAATGCCATTTTCATCTATTGGTTCCATTAT  
TTCTCTCACAGAATTATCTTTTTTTTTATTTATCTTATGAGAAAGGCTTTCTTCCCA  
ACGTAATCTTTGAGAACTTTAAATGTAACAACCTTCAATTGAATGGTTACAAGCC  
CTACCCCCTAGTG

China

ATTATTAGACAAGAAAGGGGGGAAAAAGAAGCTTTTGGAACCTTAGGAATAATTT  
ATGCCATGATAGCTATCGGATTATTAGGATTCGTAGTTTGAGCTCACCATATATT  
TACAGTAGGGATAGATGTAGATACCCGAGCTTACTTCACTTCAGCAACTATAATT  
ATTGCGGTTCCAACCTGGGATTAAGTCTTTAGATGACTAGCCACCTTTTCATGGAA  
CTCAAATTTTAAATAGACCAGTAACCCTGTGAGCTTTAGGTTTTGTATTTTTATTT  
ACAGTAGGAGGATTAACAGGGGTAATTTAGCTAATTCTTCAATTGATATTATTCT  
TCACGATACTTACTATGTAGTAGCTCATTTTTCACTATGTTCTTTCTATAGGAGCTG  
TATTTGCAATTATAGCCGGAATTGTCCAATGATTCCCATTATTTACCGGACTAAC  
CTTAAATAATTTTTTTTTAAAAACCCAATTTATTACTATATTTTTAGGTGTAAATTTA  
ACATTTTTTCCCAACACTTTTTAGGGCTAAGAGGAATGCCTCGGCGATATTCGG  
ATTATCCAGATGCTTTCACTATCTGAAATGCCATTTTCATCTATTGGTTCCATTATT  
TCTCTCACAGAATTATCTTTTTTTTTATTTATCTTATGAGAAAGGCTTTCTTCCCAA  
CGTAAATCTTTGAGAACTTTAAATGTAACAACCTTCAATTGAATGGTTACAAGCCCT  
ACCCCCTAGTG

FRA\_CHA\_5

ATTATTAGACAAGAAAGGGGGGAAAAAGAAGCTTTTGGAACCTTAGGAATAATTT  
ATGCCATGATAGCTATCGGATTATTAGGATTCGTAGTTTGAGCTCACCATATATT  
TACAGTAGGGATAGATGTAGATACCCGAGCTTACTTCACTTCAGCAACTATAATT  
ATTGCGGTTCCAACCTGGGATTAAGTCTTTAGATGACTAGCCACCTTTTCATGGAA  
CTCAAATTTTAAATAGACCAGTAACCCTGTGAGCTTTAGGCTTTGTATTTTTATTT  
ACAGTAGGAGGATTAACAGGGGTAATTTAGCTAATTCTTCAATTGATATTATTCT  
TCACGATACTTACTATGTAGTAGCTCATTTTTCACTATGTTCTTTCTATAGGAGCTG  
TATTTGCAATTATAGCCGGAATTGTCCAATGATTTCCATTATTTACTGGACTAAC  
TTAAATAATTTTTTTTTAAAAACCCAATTTATTACTATATTTTTAGGTGTAAATTTAA  
CATTTTTTCTCAACACTTTTTAGGGCTAAGAGGAATGCCTCGGCGATATTCGGA  
TTATCCAGATGCTTTCACTATCTGAAATGCCATTTTCATCTATTGGTTCCATTATTT

CTCTCACAAGAATTATCTTTTTTTTATTTATCTTATGAGAAAGGCTTTCTTCCCAA  
CGTAAATCTTTGAGAACTTTAAATGTAACAACCTTCAATTGAATGGTTACAAGCCCT  
ACCCCCTAGTG

SPA\_PRA\_1

ATTATTAGACAAGAAAGGGGGGAAAAAAGAAGCTTTTGGAACCTTAGGAATAATTT  
ATGCCATGATAGCTATCGGATTATTAGGATTCGTAGTTTGAGCTCACCATATATT  
TACAGTAGGGATAGATGTAGATACCCGAGCTTACTTCACTTCAGCAACTATAATT  
ATTGCGGTTCCAACCTGGGATTAAGTCTTTAGATGACTAGCCACCTTTTCATGGAA  
CTCAAATTTTAAATAGACCAGTAACCCTGTGAGCTTTAGGTTTTGTATTTTTATTT  
ACAGTAGGAGGATTAACAGGGGTAATTTTAGCTAATTCTTCAATTGATATTATTCT  
TCACGATACTTACTATGTAGTAGCTCATTTTCACTATGTTCTTTCTATAGGAGCTG  
TATTTGCAATTATAGCCGGAATTGTCCAATGATTCCCATTATTTACCGGACTAAC  
CTTAAATAATTTTTTTTTTAAAAACCCAATTTATTACTATATTTTTAGGTGTAAATTTA  
ACATTTTTTCCCAACACTTTTTAGGGCTAAGAGGAATGCCTCGGCGATATTCGG  
ATTATCCAGATGCTTTCCTACTATCTGAAATGCCATTTTCATCTATTGGTTCCATTATT  
TCTCTCACAAGAATTATCTTTTTTTTATTTATCTTATGAGAAAGGCTTTCTTCCCAA  
CGTAAATCTTTGAGAACTTTAAATGTAACAACCTTCAATTGAATGGTTACAAGCCCT  
ACCCCCTAGTG

SWI\_NEU\_1

ATTATTAGACAAGAAAGGGGGGAAAAAAGAAGCTTTTGGAACCTTAGGAATAATTT  
ATGCCATGATAGCTATCGGATTATTAGGATTCGTAGTTTGAGCTCACCATATATT  
TACAGTAGGGATAGATGTAGATACCCGAGCTTACTTCACTTCAGCAACTATGATT  
ATCGCGGTTCCAACCTGGGATTAAGTCTTTAGGTGGCTAGCCACCTTTTCATGGA  
ACTCAAATTTTAAATAGACCAGTAACCCTGTGAGCTTTAGGTTTTGTATTTTTATT  
TACAGTAGGAGGATTAACAGGGGTAATTTTAGCTAATTCTTCAATTGATATTATTC  
TTCACGATACTTACTATGTAGTAGCTCATTTTCACTATGTTCTTTCTATAGGAGCT  
GTATTTGCAATTATAGCCGGAATTGTCCAATGATTCCCATTATTTACTGGACTAA  
CCTTAAATAATTTTTTTTTTAAAAACCCAATTTATTACTATATTTTTAGGTGTAAATTT  
AACATTTTTTCTCAACACTTTTTAGGGCTAAGAGGAATGCCTCGGCGATATTCG  
GATTATCCAGATGCTTTCCTACTATCTGAAATGCCATTTTCATCTATTGGTTCCATTAT  
TTCTCTCACAAGAATTATCTTTTTTTTATTTATCTTATGAGAAAGGCTTTCTTCCCAA  
ACGTAATCTTTGAGAACTTTAAATGTAACAACCTTCAATTGAATGGTTACAAGCC  
CTACCCCCTAGTG

SWT\_NEU

ATTATTAGACAAGAAAGGGGGGAAAAAAGAAGCTTTTGGAACCTTAGGAATAATTT  
ATGCCATGATAGCTATCGGATTATTAGGATTCGTAGTTTGAGCTCACCATATATT  
TACAGTAGGGATAGATGTAGATACCCGAGCTTACTTCACTTCAGCAACTATGATT  
ATCGCGGTTCCAACCTGGGATTAAGTCTTTAGGTGGCTAGCCACCTTTTCATGGA  
ACTCAAATTTTAAATAGACCAGTAACCCTGTGAGCTTTAGGTTTTGTATTTTTATT  
TACAGTAGGAGGATTAACAGGGGTAATTTTAGCTAATTCTTCAATTGATATTATTC  
TTCACGATACTTACTATGTAGTAGCTCATTTTCACTATGTTCTTTCTATAGGAGCT  
GTATTTGCAATTATAGCCGGAATTGTCCAATGATTCCCATTATTTACTGGACTAA  
CCTTAAATAATTTTTTTTTTAAAAACCCAATTTATTACTATATTTTTAGGTGTAAATTT  
AACATTTTTTCTCAACACTTTTTAGGGCTAAGAGGAATGCCTCGGCGATATTCG  
GATTATCCAGATGCTTTCCTACTATCTGAAATGCCATTTTCATCTATTGGTTCCATTAT  
TTCTCTCACAAGAATTATCTTTTTTTTATTTATCTTATGAGAAAGGCTTTCTTCCCAA  
ACGTAATCTTTGAGAACTTTAAATGTAACAACCTTCAATTGAATGGTTACAAGCC  
CTACCCCCTAGTG

SWT\_NEU2

ATTATTAGACAAGAAAGGGGGGAAAAAAGAAGCTTTTGGAACCTTAGGAATAATTT



ATGCCATGATAGCTATCGGATTATTAGGATTCGTAGTTTGAGCTCACCATATATT  
TACAGTAGGGATAGATGTAGATACCCGAGCTTACTTCACTTCAGCAACTATGATT  
ATCGCGGTTCCAACCTGGGATTAAGTCTTTAGGTGGCTAGCCACCTTTCATGGA  
ACTCAAATTTTAAATAGACCAGTAACCCTGTGAGCTTTAGGTTTTGTATTTTTATT  
TACAGTAGGAGGATTAACAGGGGTAATTTTAGCTAATTCTTCAATTGATATTATTC  
TTCACGATACTTACTATGTAGTAGCTCATTTTTCACTATGTTCTTTCTATAGGAGCT  
GTATTTGCAATTATAGCCGGAATTGTCCAATGATTCCCATTATTTACTGGACTAA  
CCTTAAATAATTTTTTTTTTAAAAACCCAATTTATTACTATATTTTTTAGGTGTAAATTT  
AACATTTTTTCTCAACACTTTTTAGGGCTAAGAGGAATGCCTCGGCGATATTCG  
GATTATCCAGATGCTTTCCTATCTGAAATGCCATTTTCATCTATTGGTTCCATTAT  
TTCTCTCACAAGAATTATCTTTTTTTTTATTTATCTTATGAGAAAGGCTTTCTTCCCA  
ACGTAATCTTTGAGAACTTTAAATGTAACAACCTTCAATTGAATGGTTACAAGCC  
CTACCCCTAGTG

MEX\_YOH

ATTATTAGACAAGAAAGGGGGGAAAAAAGAAGCTTTTGGAACCTTAGGAATAATTT  
ATGCTATAATAGCTATCGGATTATTAGGATTCGTAGTTTGAGCTCACCATATATTT  
ACAGTAGGAATAGATGTAGATACCCGAGCTTACTTCACTTCAGCAACTATAATTA  
TTGCGGTTCCAACCTGGGATTAAGTCTTTAGATGACTAGCCACCTTTCATGGAAC  
TCAAATTTTAAATAGACCAGTAACCCTGTGAGCTTTAGGTTTTGTATTTTTATTTA  
CAGTAGGAGGATTAACAGGGGTAATTTTAGCTAATTCTTCAATTGATATTATTCTC  
CACGATACTTACTATGTAGTAGCTCATTTTTCACTATGTTCTTTCTATAGGAGCTGT  
ATTTGCAATTATAGCCGGAATTGTCCAATGATTCCCATTATTTACCGGACTAACC  
TTAAATAATTTTTTTTTTAAAAACCCAATTTATTACTATATTTTTTAGGTGTAAATTTAA  
CATTTTTTCTCAACACTTTTTAGGGCTAAGAGGAATGCCTCGGCGATATTCGGA  
TTATCCAGATGCTTTCCTATCTGAAATGCCATTTTCATCTATTGGTTCCATTATTT  
CTCTCACAAGAATTATCTTTTTTTTTATTTATCTTATGAGAAAGGCTTTCTTCCCAA  
CGTAAATCTTTGAGAACTTTAAATGTAACAACCTTCAATTGAATGGTTTCAAGCCCT  
ACCCCTAGTG

MEX\_YOH\_1

ATTATTAGACAAGAAAGGGGGGAAAAAAGAAGCTTTTGGAACCTTAGGAATAATTT  
ATGCTATAATAGCTATCGGATTATTAGGATTCGTAGTTTGAGCTCACCATATATTT  
ACAGTAGGAATAGATGTAGATACCCGAGCTTACTTCACTTCAGCAACTATAATTA  
TTGCGGTTCCAACCTGGGATTAAGTCTTTAGATGACTAGCCACCTTTCATGGAAC  
TCAAATTTTAAATAGACCAGTAACCCTGTGAGCTTTAGGTTTTGTATTTTTATTTA  
CAGTAGGAGGATTAACAGGGGTAATTTTAGCTAATTCTTCAATTGATATTATTCTC  
CACGATACTTACTATGTAGTAGCTCATTTTTCACTATGTTCTTTCTATAGGAGCTGT  
ATTTGCAATTATAGCCGGAATTGTCCAATGATTCCCATTATTTACCGGACTAACC  
TTAAATAATTTTTTTTTTAAAAACCCAATTTATTACTATATTTTTTAGGTGTAAATTTAA  
CATTTTTTCTCAACACTTTTTAGGGCTAAGAGGAATGCCTCGGCGATATTCGGA  
TTATCCAGATGCTTTCCTATCTGAAATGCCATTTTCATCTATTGGTTCCATTATTT  
CTCTCACAAGAATTATCTTTTTTTTTATTTATCTTATGAGAAAGGCTTTCTTCCCAA  
CGTAAATCTTTGAGAACTTTAAATGTAACAACCTTCAATTGAATGGTTTCAAGCCCT  
ACCCCTAGTG

MEX\_YOH\_2

ATTATTAGACAAGAAAGGGGGGAAAAAAGAAGCTTTTGGAACCTTAGGAATAATTT  
ATGCTATAATAGCTATCGGATTATTAGGATTCGTAGTTTGAGCTCACCATATATTT  
ACAGTAGGAATAGATGTAGATACCCGAGCTTACTTCACTTCAGCAACTATAATTA  
TTGCGGTTCCAACCTGGGATTAAGTCTTTAGATGACTAGCCACCTTTCATGGAAC  
TCAAATTTTAAATAGACCAGTAACCCTGTGAGCTTTAGGTTTTGTATTTTTATTTA  
CAGTAGGAGGATTAACAGGGGTAATTTTAGCTAATTCTTCAATTGATATTATTCTC

CACGATACTTACTATGTAGTAGCTCATTTCCTACTATGTTCTTTCTATAGGAGCTGT  
ATTTGCAATTATAGCCGGAATTGTCCAATGATTCCCATTATTTACCGGACTAACC  
TTAAATAATTTTTTTTTTAAAAACCCAATTTATTACTATATTTTTAGGTGTAAATTTAA  
CATTTTTTCCTCAACACTTTTTAGGGCTAAGAGGAATGCCTCGGCGATATTCGGA  
TTATCCAGATGCTTTCACTATCTGAAATGCCATTTTCATCTATTGGTTCCATTATTT  
CTCTCACAAGAATTATCTTTTTTTTTATTTATCTTATGAGAAAGGCTTTCTTCCCAA  
CGTAAATCTTTGAGAACTTTAAATGTAACAACCTTCAATTGAATGTTTTCAAGCCCT  
ACCCCCTAGTG

AOPE\_15

ATTATTAGACAAGAAAGGGGGGAAAAAAGAAGCTTTTGGAACCTTAGGAATAATTT  
ATGCTATAATAGCTATCGGATTATTAGGATTCGTAGTTTGAGCTCACCATATATTT  
ACAGTAGGAATAGATGTAGATACCCGAGCTTACTTCACTTCAGCAACTATAATTA  
TTGCGGTTCCAACCTGGGATTAAGTCTTTAGATGACTAGCCACCTTTTCATGGAAC  
TCAAATTTTAAATAGACCAGTAACCCTGTGAGCTTTAGGTTTTGTATTTTTATTTA  
CAGTAGGAGGATTAACAGGGGTAAATTTAGCTAATTCTTCAATTGATATTATTCTC  
CACGATACTTACTATGTAGTAGCTCATTTCCTACTATGTTCTTTCTATAGGAGCTGT  
ATTTGCAATTATAGCCGGAATTGTCCAATGATTCCCATTATTTACCGGACTAACC  
TTAAATAATTTTTTTTTTAAAAACCCAATTTATTACTATATTTTTAGGTGTAAATTTAA  
CATTTTTTCCTCAACACTTTTTAGGGCTAAGAGGAATGCCTCGGCGATATTCGGA  
TTATCCAGATGCTTTCACTATCTGAAATGCCATTTTCATCTATTGGTTCCATTATTT  
CTCTCACAAGAATTATCTTTTTTTTTATTTATCTTATGAGAAAGGCTTTCTTCCCAA  
CGTAAATCTTTGAGAACTTTAAATGTAACAACCTTCAATTGAATGTTTTCAAGCCCT  
ACCCCCTAGTG

AOPE\_2

ATTATTAGACAAGAAAGGGGGGAAAAAAGAAGCTTTTGGAACCTTAGGAATAATTT  
ATGCTATAATAGCTATCGGATTATTAGGATTCGTAGTTTGAGCTCACCATATATTT  
ACAGTAGGAATAGATGTAGATACCCGAGCTTACTTCACTTCAGCAACTATAATTA  
TTGCGGTTCCAACCTGGGATTAAGTCTTTAGATGACTAGCCACCTTTTCATGGAAC  
TCAAATTTTAAATAGACCAGTAACCCTGTGAGCTTTAGGTTTTGTATTTTTATTTA  
CAGTAGGAGGATTAACAGGGGTAAATTTAGCTAATTCTTCAATTGATATTATTCTC  
CACGATACTTACTATGTAGTAGCTCATTTCCTACTATGTTCTTTCTATAGGAGCTGT  
ATTTGCAATTATAGCCGGAATTGTCCAATGATTCCCATTATTTACCGGACTAACC  
TTAAATAATTTTTTTTTTAAAAACCCAATTTATTACTATATTTTTAGGTGTAAATTTAA  
CATTTTTTCCTCAACACTTTTTAGGGCTAAGAGGAATGCCTCGGCGATATTCGGA  
TTATCCAGATGCTTTCACTATCTGAAATGCCATTTTCATCTATTGGTTCCATTATTT  
CTCTCACAAGAATTATCTTTTTTTTTATTTATCTTATGAGAAAGGCTTTCTTCCCAA  
CGTAAATCTTTGAGAACTTTAAATGTAACAACCTTCAATTGAATGTTTTCAAGCCCT  
ACCCCCTAGTG

AOPE\_3

ATTATTAGACAAGAAAGGGGGGAAAAAAGAAGCTTTTGGAACCTTAGGAATAATTT  
ATGCTATAATAGCTATCGGATTATTAGGATTCGTAGTTTGAGCTCACCATATATTT  
ACAGTAGGAATAGATGTAGATACCCGAGCTTACTTCACTTCAGCAACTATAATTA  
TTGCGGTTCCAACCTGGGATTAAGTCTTTAGATGACTAGCCACCTTTTCATGGAAC  
TCAAATTTTAAATAGACCAGTAACCCTGTGAGCTTTAGGTTTTGTATTTTTATTTA  
CAGTAGGAGGATTAACAGGGGTAAATTTAGCTAATTCTTCAATTGATATTATTCTC  
CACGATACTTACTATGTAGTAGCTCATTTCCTACTATGTTCTTTCTATAGGAGCTGT  
ATTTGCAATTATAGCCGGAATTGTCCAATGATTCCCATTATTTACCGGACTAACC  
TTAAATAATTTTTTTTTTAAAAACCCAATTTATTACTATATTTTTAGGTGTAAATTTAA  
CATTTTTTCCTCAACACTTTTTAGGGCTAAGAGGAATGCCTCGGCGATATTCGGA  
TTATCCAGATGCTTTCACTATCTGAAATGCCATTTTCATCTATTGGTTCCATTATTT

CTCTCACAAGAATTATCTTTTTTTTTATTTATCTTATGAGAAAGGCTTTCTTCCCAA  
CGTAAATCTTTGAGAACTTTAAATGTAACAACCTTCAATTGAATGGTTTCAAGCCCT  
ACCCCCTAGTG

AOPE\_12

ATTATTAGACAAGAAAGGGGGGAAAAAAGAAGCTTTTGGAACCTTAGGAATAATTT  
ATGCTATAATAGCTATCGGATTATTAGGATTCGTAGTTTGAGCTCACCATATATTT  
ACAGTAGGAATAGATGTAGATACCCGAGCTTACTTCACTTCAGCAACTATAATTA  
TTGCGGTTCCAACCTGGGATTAAGTCTTTAGATGACTAGCCACCTTTCATGGAAC  
TCAAATTTTAAATAGACCAGTAACCCTGTGAGCTTTAGGTTTTGTATTTTTATTTA  
CAGTAGGAGGATTAACAGGGGTAAATTTAGCTAATTCTTCAATTGATATTATTCTC  
CACGATACTTACTATGTAGTAGCTCATTTTCACTATGTTCTTTCTATAGGAGCTGT  
ATTTGCAATTATAGCCGGAATTGTCCAATGATTCCCATTATTTACCGGACTAACC  
TTAAATAATTTTTTTTTTAAAAACCCAATTTATTACTATATTTTTAGGTGTAATTTAA  
CATTTTTTCTCAACACTTTTTAGGGCTAAGAGGAATGCCTCGGCGATATTCGGA  
TTATCCAGATGCTTTCCTACTATCTGAAATGCCATTTTCTATTGGTTCCATTATTT  
CTCTCACAAGAATTATCTTTTTTTTTATTTATCTTATGAGAAAGGCTTTCTTCCCAA  
CGTAAATCTTTGAGAACTTTAAATGTAACAACCTTCAATTGAATGGTTTCAAGCCCT  
ACCCCCTAGTG

AOPE\_13

ATTATTAGACAAGAAAGGGGGGAAAAAAGAAGCTTTTGGAACCTTAGGAATAATTT  
ATGCTATAATAGCTATCGGATTATTAGGATTCGTAGTTTGAGCTCACCATATATTT  
ACAGTAGGAATAGATGTAGATACCCGAGCTTACTTCACTTCAGCAACTATAATTA  
TTGCGGTTCCAACCTGGGATTAAGTCTTTAGATGACTAGCCACCTTTCATGGAAC  
TCAAATTTTAAATAGACCAGTAACCCTGTGAGCTTTAGGTTTTGTATTTTTATTTA  
CAGTAGGAGGATTAACAGGGGTAAATTTAGCTAATTCTTCAATTGATATTATTCTC  
CACGATACTTACTATGTAGTAGCTCATTTTCACTATGTTCTTTCTATAGGAGCTGT  
ATTTGCAATTATAGCCGGAATTGTCCAATGATTCCCATTATTTACCGGACTAACC  
TTAAATAATTTTTTTTTTAAAAACCCAATTTATTACTATATTTTTAGGTGTAATTTAA  
CATTTTTTCTCAACACTTTTTAGGGCTAAGAGGAATGCCTCGGCGATATTCGGA  
TTATCCAGATGCTTTCCTACTATCTGAAATGCCATTTTCTATTGGTTCCATTATTT  
CTCTCACAAGAATTATCTTTTTTTTTATTTATCTTATGAGAAAGGCTTTCTTCCCAA  
CGTAAATCTTTGAGAACTTTAAATGTAACAACCTTCAATTGAATGGTTTCAAGCCCT  
ACCCCCTAGTG

AOPE\_14

ATTATTAGACAAGAAAGGGGGGAAAAAAGAAGCTTTTGGAACCTTAGGAATAATTT  
ATGCTATAATAGCTATCGGATTATTAGGATTCGTAGTTTGAGCTCACCATATATTT  
ACAGTAGGAATAGATGTAGATACCCGAGCTTACTTCACTTCAGCAACTATAATTA  
TTGCGGTTCCAACCTGGGATTAAGTCTTTAGATGACTAGCCACCTTTCATGGAAC  
TCAAATTTTAAATAGACCAGTAACCCTGTGAGCTTTAGGTTTTGTATTTTTATTTA  
CAGTAGGAGGATTAACAGGGGTAAATTTAGCTAATTCTTCAATTGATATTATTCTC  
CACGATACTTACTATGTAGTAGCTCATTTTCACTATGTTCTTTCTATAGGAGCTGT  
ATTTGCAATTATAGCCGGAATTGTCCAATGATTCCCATTATTTACCGGACTAACC  
TTAAATAATTTTTTTTTTAAAAACCCAATTTATTACTATATTTTTAGGTGTAATTTAA  
CATTTTTTCTCAACACTTTTTAGGGCTAAGAGGAATGCCTCGGCGATATTCGGA  
TTATCCAGATGCTTTCCTACTATCTGAAATGCCATTTTCTATTGGTTCCATTATTT  
CTCTCACAAGAATTATCTTTTTTTTTATTTATCTTATGAGAAAGGCTTTCTTCCCAA  
CGTAAATCTTTGAGAACTTTAAATGTAACAACCTTCAATTGAATGGTTTCAAGCCCT  
ACCCCCTAGTG

AOPE\_4

ATTATTAGACAAGAAAGGGGGGAAAAAAGAAGCTTTTGGAACCTTAGGAATAATTT

ATGCTATAATAGCTATCGGATTATTAGGATTCGTAGTTTGAGCTCACCATATATTT  
ACAGTAGGAATAGATGTAGATACCCGAGCTTACTTCACTTCAGCAACTATAATTA  
TTGCGGTTCCAACCTGGGATTAAGTCTTTAGATGACTAGCCACCTTTTCATGGAAC  
TCAAATTTTAAATAGACCAGTAACCCTGTGAGCTTTAGGTTTTGTATTTTTATTTA  
CAGTAGGAGGATTAACAGGGGTAAATTTTAGCTAATTCTTCAATTGATATTATTCTC  
CACGATACTTACTATGTAGTAGCTCATTTTCACTATGTTCTTTCTATAGGAGCTGT  
ATTTGCAATTATAGCCGGAATTGTCCAATGATTCCCATTATTTACCGGACTAACC  
TTAAATAATTTTTTTTTTAAAAACCCAATTTATTACTATATTTTTAGGTGTAAATTTAA  
CATTTTTTCTCAACACTTTTTAGGGCTAAGAGGAATGCCTCGGCGATATTCGGA  
TTATCCAGATGCTTTCACTATCTGAAATGCCATTTTCATCTATTGGTTCCATTATTT  
CTCTCACAAGAATTATCTTTTTTTTTATTTATCTTATGAGAAAGGCTTTCTTCCCAA  
CGTAAATCTTTGAGAACTTTAAATGTAACAACCTTCAATTGAATGGTTTCAAGCCCT  
ACCCCTAGTG

PE2\_1

ATTATTAGACAAGAAAGGGGGGAAAAAAGAAGCTTTTGGAACCTTAGGAATAATTT  
ATGCTATAATAGCTATCGGATTATTAGGATTCGTAGTTTGAGCTCACCATATATTT  
ACAGTAGGAATAGATGTAGATACCCGAGCTTACTTCACTTCAGCAACTATAATTA  
TTGCGGTTCCAACCTGGGATTAAGTCTTTAGATGACTAGCCACCTTTTCATGGAAC  
TCAAATTTTAAATAGACCAGTAACCCTGTGAGCTTTAGGTTTTGTATTTTTATTTA  
CAGTAGGAGGATTAACAGGGGTAAATTTTAGCTAATTCTTCAATTGATATTATTCTC  
CACGATACTTACTATGTAGTAGCTCATTTTCACTATGTTCTTTCTATAGGAGCTGT  
ATTTGCAATTATAGCCGGAATTGTCCAATGATTCCCATTATTTACCGGACTAACC  
TTAAATAATTTTTTTTTTAAAAACCCAATTTATTACTATATTTTTAGGTGTAAATTTAA  
CATTTTTTCTCAACACTTTTTAGGGCTAAGAGGAATGCCTCGGCGATATTCGGA  
TTATCCAGATGCTTTCACTATCTGAAATGCCATTTTCATCTATTGGTTCCATTATTT  
CTCTCACAAGAATTATCTTTTTTTTTATTTATCTTATGAGAAAGGCTTTCTTCCCAA  
CGTAAATCTTTGAGAACTTTAAATGTAACAACCTTCAATTGAATGGTTTCAAGCCCT  
ACCCCTAGTG

PE2\_2

ATTATTAGACAAGAAAGGGGGGAAAAAAGAAGCTTTTGGAACCTTAGGAATAATTT  
ATGCTATAATAGCTATCGGATTATTAGGATTCGTAGTTTGAGCTCACCATATATTT  
ACAGTAGGAATAGATGTAGATACCCGAGCTTACTTCACTTCAGCAACTATAATTA  
TTGCGGTTCCAACCTGGGATTAAGTCTTTAGATGACTAGCCACCTTTTCATGGAAC  
TCAAATTTTAAATAGACCAGTAACCCTGTGAGCTTTAGGTTTTGTATTTTTATTTA  
CAGTAGGAGGATTAACAGGGGTAAATTTTAGCTAATTCTTCAATTGATATTATTCTC  
CACGATACTTACTATGTAGTAGCTCATTTTCACTATGTTCTTTCTATAGGAGCTGT  
ATTTGCAATTATAGCCGGAATTGTCCAATGATTCCCATTATTTACCGGACTAACC  
TTAAATAATTTTTTTTTTAAAAACCCAATTTATTACTATATTTTTAGGTGTAAATTTAA  
CATTTTTTCTCAACACTTTTTAGGGCTAAGAGGAATGCCTCGGCGATATTCGGA  
TTATCCAGATGCTTTCACTATCTGAAATGCCATTTTCATCTATTGGTTCCATTATTT  
CTCTCACAAGAATTATCTTTTTTTTTATTTATCTTATGAGAAAGGCTTTCTTCCCAA  
CGTAAATCTTTGAGAACTTTAAATGTAACAACCTTCAATTGAATGGTTTCAAGCCCT  
ACCCCTAGTG

PE2\_3

ATTATTAGACAAGAAAGGGGGGAAAAAAGAAGCTTTTGGAACCTTAGGAATAATTT  
ATGCTATAATAGCTATCGGATTATTAGGATTCGTAGTTTGAGCTCACCATATATTT  
ACAGTAGGAATAGATGTAGATACCCGAGCTTACTTCACTTCAGCAACTATAATTA  
TTGCGGTTCCAACCTGGGATTAAGTCTTTAGATGACTAGCCACCTTTTCATGGAAC  
TCAAATTTTAAATAGACCAGTAACCCTGTGAGCTTTAGGTTTTGTATTTTTATTTA  
CAGTAGGAGGATTAACAGGGGTAAATTTTAGCTAATTCTTCAATTGATATTATTCTC

CACGATACTTACTATGTAGTAGCTCATTTCCTACTATGTTCTTTCTATAGGAGCTGT  
ATTTGCAATTATAGCCGGAATTGTCCAATGATTCCCATTATTTACCGGACTAACC  
TTAAATAATTTTTTTTTTAAAAACCCAATTTATTACTATATTTTTAGGTGTAAATTTAA  
CATTTTTTCCTCAACACTTTTTAGGGCTAAGAGGAATGCCTCGGCGATATTCGGA  
TTATCCAGATGCTTTCACTATCTGAAATGCCATTTTCATCTATTGGTTCCATTATTT  
CTCTCACAAGAATTATCTTTTTTTTTATTTATCTTATGAGAAAGGCTTTCTTCCCAA  
CGTAAATCTTTGAGAACTTTAAATGTAACAACCTTCAATTGAATGTTTTCAAGCCCT  
ACCCCCTAGTG

PE2\_4

ATTATTAGACAAGAAAGGGGGGAAAAAGAAGCTTTTGGAACCTTAGGAATAATTT  
ATGCTATAATAGCTATCGGATTATTAGGATTCGTAGTTTGAGCTCACCATATATTT  
ACAGTAGGAATAGATGTAGATACCCGAGCTTACTTCACTTCAGCAACTATAATTA  
TTGCGGTTCCAACCTGGGATTAAGTCTTTAGATGACTAGCCACCTTTTCATGGAAC  
TCAAATTTTAAATAGACCAGTAACCCTGTGAGCTTTAGGTTTTGTATTTTTATTTA  
CAGTAGGAGGATTAACAGGGGTAAATTTAGCTAATTCTTCAATTGATATTATTCTC  
CACGATACTTACTATGTAGTAGCTCATTTCCTACTATGTTCTTTCTATAGGAGCTGT  
ATTTGCAATTATAGCCGGAATTGTCCAATGATTCCCATTATTTACCGGACTAACC  
TTAAATAATTTTTTTTTTAAAAACCCAATTTATTACTATATTTTTAGGTGTAAATTTAA  
CATTTTTTCCTCAACACTTTTTAGGGCTAAGAGGAATGCCTCGGCGATATTCGGA  
TTATCCAGATGCTTTCACTATCTGAAATGCCATTTTCATCTATTGGTTCCATTATTT  
CTCTCACAAGAATTATCTTTTTTTTTATTTATCTTATGAGAAAGGCTTTCTTCCCAA  
CGTAAATCTTTGAGAACTTTAAATGTAACAACCTTCAATTGAATGTTTTCAAGCCCT  
ACCCCCTAGTG

PE2\_5

ATTATTAGACAAGAAAGGGGGGAAAAAGAAGCTTTTGGAACCTTAGGAATAATTT  
ATGCTATAATAGCTATCGGATTATTAGGATTCGTAGTTTGAGCTCACCATATATTT  
ACAGTAGGAATAGATGTAGATACCCGAGCTTACTTCACTTCAGCAACTATAATTA  
TTGCGGTTCCAACCTGGGATTAAGTCTTTAGATGACTAGCCACCTTTTCATGGAAC  
TCAAATTTTAAATAGACCAGTAACCCTGTGAGCTTTAGGTTTTGTATTTTTATTTA  
CAGTAGGAGGATTAACAGGGGTAAATTTAGCTAATTCTTCAATTGATATTATTCTC  
CACGATACTTACTATGTAGTAGCTCATTTCCTACTATGTTCTTTCTATAGGAGCTGT  
ATTTGCAATTATAGCCGGAATTGTCCAATGATTCCCATTATTTACCGGACTAACC  
TTAAATAATTTTTTTTTTAAAAACCCAATTTATTACTATATTTTTAGGTGTAAATTTAA  
CATTTTTTCCTCAACACTTTTTAGGGCTAAGAGGAATGCCTCGGCGATATTCGGA  
TTATCCAGATGCTTTCACTATCTGAAATGCCATTTTCATCTATTGGTTCCATTATTT  
CTCTCACAAGAATTATCTTTTTTTTTATTTATCTTATGAGAAAGGCTTTCTTCCCAA  
CGTAAATCTTTGAGAACTTTAAATGTAACAACCTTCAATTGAATGTTTTCAAGCCCT  
ACCCCCTAGTG

PE2\_6

ATTATTAGACAAGAAAGGGGGGAAAAAGAAGCTTTTGGAACCTTAGGAATAATTT  
ATGCTATAATAGCTATCGGATTATTAGGATTCGTAGTTTGAGCTCACCATATATTT  
ACAGTAGGAATAGATGTAGATACCCGAGCTTACTTCACTTCAGCAACTATAATTA  
TTGCGGTTCCAACCTGGGATTAAGTCTTTAGATGACTAGCCACCTTTTCATGGAAC  
TCAAATTTTAAATAGACCAGTAACCCTGTGAGCTTTAGGTTTTGTATTTTTATTTA  
CAGTAGGAGGATTAACAGGGGTAAATTTAGCTAATTCTTCAATTGATATTATTCTC  
CACGATACTTACTATGTAGTAGCTCATTTCCTACTATGTTCTTTCTATAGGAGCTGT  
ATTTGCAATTATAGCCGGAATTGTCCAATGATTCCCATTATTTACCGGACTAACC  
TTAAATAATTTTTTTTTTAAAAACCCAATTTATTACTATATTTTTAGGTGTAAATTTAA  
CATTTTTTCCTCAACACTTTTTAGGGCTAAGAGGAATGCCTCGGCGATATTCGGA  
TTATCCAGATGCTTTCACTATCTGAAATGCCATTTTCATCTATTGGTTCCATTATTT

CTCTCACAAGAATTATCTTTTTTTTATTTATCTTATGAGAAAGGCTTTCTTCCCAA  
CGTAAATCTTTGAGAACTTTAAATGTAACAACCTTCAATTGAATGGTTTCAAGCCCT  
ACCCCCTAGTG

PE2\_7

ATTATTAGACAAGAAAGGGGGGAAAAAAGAAGCTTTTGGAACCTTAGGAATAATTT  
ATGCTATAATAGCTATCGGATTATTAGGATTCGTAGTTTGAGCTCACCATATATTT  
ACAGTAGGAATAGATGTAGATACCCGAGCTTACTTCACTTCAGCAACTATAATTA  
TTGCGGTTCCAACCTGGGATTAAGTCTTTAGATGACTAGCCACCTTTCATGGAAC  
TCAAATTTTAAATAGACCAGTAACCCTGTGAGCTTTAGGTTTTGTATTTTTATTTA  
CAGTAGGAGGATTAACAGGGGTAAATTTAGCTAATTCTTCAATTGATATTATTCTC  
CACGATACTTACTATGTAGTAGCTCATTTTCACTATGTTCTTTCTATAGGAGCTGT  
ATTTGCAATTATAGCCGGAATTGTCCAATGATTCCCATTATTTACCGGACTAACC  
TTAAATAATTTTTTTTTTAAAAACCCAATTTATTACTATATTTTTAGGTGTAATTTAA  
CATTTTTTCTCAACACTTTTTAGGGCTAAGAGGAATGCCTCGGCGATATTCGGA  
TTATCCAGATGCTTTCACTATCTGAAATGCCATTTTCTATTGGTTCCATTATTT  
CTCTCACAAGAATTATCTTTTTTTTATTTATCTTATGAGAAAGGCTTTCTTCCCAA  
CGTAAATCTTTGAGAACTTTAAATGTAACAACCTTCAATTGAATGGTTTCAAGCCCT  
ACCCCCTAGTG

PE3\_1

ATTATTAGACAAGAAAGGGGGGAAAAAAGAAGCTTTTGGAACCTTAGGAATAATTT  
ATGCTATAATAGCTATCGGATTATTAGGATTCGTAGTTTGAGCTCACCATATATTT  
ACAGTAGGAATAGATGTAGATACCCGAGCTTACTTCACTTCAGCAACTATAATTA  
TTGCGGTTCCAACCTGGGATTAAGTCTTTAGATGACTAGCCACCTTTCATGGAAC  
TCAAATTTTAAATAGACCAGTAACCCTGTGAGCTTTAGGTTTTGTATTTTTATTTA  
CAGTAGGAGGATTAACAGGGGTAAATTTAGCTAATTCTTCAATTGATATTATTCTC  
CACGATACTTACTATGTAGTAGCTCATTTTCACTATGTTCTTTCTATAGGAGCTGT  
ATTTGCAATTATAGCCGGAATTGTCCAATGATTCCCATTATTTACCGGACTAACC  
TTAAATAATTTTTTTTTTAAAAACCCAATTTATTACTATATTTTTAGGTGTAATTTAA  
CATTTTTTCTCAACACTTTTTAGGGCTAAGAGGAATGCCTCGGCGATATTCGGA  
TTATCCAGATGCTTTCACTATCTGAAATGCCATTTTCTATTGGTTCCATTATTT  
CTCTCACAAGAATTATCTTTTTTTTATTTATCTTATGAGAAAGGCTTTCTTCCCAA  
CGTAAATCTTTGAGAACTTTAAATGTAACAACCTTCAATTGAATGGTTTCAAGCCCT  
ACCCCCTAGTG

PE4\_1

ATTATTAGACAAGAAAGGGGGGAAAAAAGAAGCTTTTGGAACCTTAGGAATAATTT  
ATGCTATAATAGCTATCGGATTATTAGGATTCGTAGTTTGAGCTCACCATATATTT  
ACAGTAGGAATAGATGTAGATACCCGAGCTTACTTCACTTCAGCAACTATAATTA  
TTGCGGTTCCAACCTGGGATTAAGTCTTTAGATGACTAGCCACCTTTCATGGAAC  
TCAAATTTTAAATAGACCAGTAACCCTGTGAGCTTTAGGTTTTGTATTTTTATTTA  
CAGTAGGAGGATTAACAGGGGTAAATTTAGCTAATTCTTCAATTGATATTATTCTC  
CACGATACTTACTATGTAGTAGCTCATTTTCACTATGTTCTTTCTATAGGAGCTGT  
ATTTGCAATTATAGCCGGAATTGTCCAATGATTCCCATTATTTACCGGACTAACC  
TTAAATAATTTTTTTTTTAAAAACCCAATTTATTACTATATTTTTAGGTGTAATTTAA  
CATTTTTTCTCAACACTTTTTAGGGCTAAGAGGAATGCCTCGGCGATATTCGGA  
TTATCCAGATGCTTTCACTATCTGAAATGCCATTTTCTATTGGTTCCATTATTT  
CTCTCACAAGAATTATCTTTTTTTTATTTATCTTATGAGAAAGGCTTTCTTCCCAA  
CGTAAATCTTTGAGAACTTTAAATGTAACAACCTTCAATTGAATGGTTTCAAGCCCT  
ACCCCCTAGTG

PE4\_2

ATTATTAGACAAGAAAGGGGGGAAAAAAGAAGCTTTTGGAACCTTAGGAATAATTT

ATGCTATAATAGCTATCGGATTATTAGGATTCGTAGTTTGAGCTCACCATATATTT  
ACAGTAGGAATAGATGTAGATACCCGAGCTTACTTCACTTCAGCAACTATAATTA  
TTGCGGTTCCAACCTGGGATTAAGTCTTTAGATGACTAGCCACCTTTTCATGGAAC  
TCAAATTTTAAATAGACCAGTAACCCTGTGAGCTTTAGGTTTTGTATTTTTATTTA  
CAGTAGGAGGATTAACAGGGGTAAATTTTAGCTAATTCTTCAATTGATATTATTCTC  
CACGATACTTACTATGTAGTAGCTCATTTTCACTATGTTCTTTCTATAGGAGCTGT  
ATTTGCAATTATAGCCGGAATTGTCCAATGATTCCCATTATTTACCGGACTAACC  
TTAAATAATTTTTTTTTTAAAAACCCAATTTATTACTATATTTTTAGGTGTAAATTTAA  
CATTTTTTCTCAACACTTTTTAGGGCTAAGAGGAATGCCTCGGCGATATTCGGA  
TTATCCAGATGCTTTCACTATCTGAAATGCCATTTTCATCTATTGGTTCCATTATTT  
CTCTCACAAGAATTATCTTTTTTTTTATTTATCTTATGAGAAAGGCTTTCTTCCCAA  
CGTAAATCTTTGAGAACTTTAAATGTAACAACCTTCAATTGAATGGTTTCAAGCCCT  
ACCCCTAGTG

PE4\_3

ATTATTAGACAAGAAAGGGGGGAAAAAAGAAGCTTTTGGAACCTTAGGAATAATTT  
ATGCTATAATAGCTATCGGATTATTAGGATTCGTAGTTTGAGCTCACCATATATTT  
ACAGTAGGAATAGATGTAGATACCCGAGCTTACTTCACTTCAGCAACTATAATTA  
TTGCGGTTCCAACCTGGGATTAAGTCTTTAGATGACTAGCCACCTTTTCATGGAAC  
TCAAATTTTAAATAGACCAGTAACCCTGTGAGCTTTAGGTTTTGTATTTTTATTTA  
CAGTAGGAGGATTAACAGGGGTAAATTTTAGCTAATTCTTCAATTGATATTATTCTC  
CACGATACTTACTATGTAGTAGCTCATTTTCACTATGTTCTTTCTATAGGAGCTGT  
ATTTGCAATTATAGCCGGAATTGTCCAATGATTCCCATTATTTACCGGACTAACC  
TTAAATAATTTTTTTTTTAAAAACCCAATTTATTACTATATTTTTAGGTGTAAATTTAA  
CATTTTTTCTCAACACTTTTTAGGGCTAAGAGGAATGCCTCGGCGATATTCGGA  
TTATCCAGATGCTTTCACTATCTGAAATGCCATTTTCATCTATTGGTTCCATTATTT  
CTCTCACAAGAATTATCTTTTTTTTTATTTATCTTATGAGAAAGGCTTTCTTCCCAA  
CGTAAATCTTTGAGAACTTTAAATGTAACAACCTTCAATTGAATGGTTTCAAGCCCT  
ACCCCTAGTG

PE4\_5

ATTATTAGACAAGAAAGGGGGGAAAAAAGAAGCTTTTGGAACCTTAGGAATAATTT  
ATGCTATAATAGCTATCGGATTATTAGGATTCGTAGTTTGAGCTCACCATATATTT  
ACAGTAGGAATAGATGTAGATACCCGAGCTTACTTCACTTCAGCAACTATAATTA  
TTGCGGTTCCAACCTGGGATTAAGTCTTTAGATGACTAGCCACCTTTTCATGGAAC  
TCAAATTTTAAATAGACCAGTAACCCTGTGAGCTTTAGGTTTTGTATTTTTATTTA  
CAGTAGGAGGATTAACAGGGGTAAATTTTAGCTAATTCTTCAATTGATATTATTCTC  
CACGATACTTACTATGTAGTAGCTCATTTTCACTATGTTCTTTCTATAGGAGCTGT  
ATTTGCAATTATAGCCGGAATTGTCCAATGATTCCCATTATTTACCGGACTAACC  
TTAAATAATTTTTTTTTTAAAAACCCAATTTATTACTATATTTTTAGGTGTAAATTTAA  
CATTTTTTCTCAACACTTTTTAGGGCTAAGAGGAATGCCTCGGCGATATTCGGA  
TTATCCAGATGCTTTCACTATCTGAAATGCCATTTTCATCTATTGGTTCCATTATTT  
CTCTCACAAGAATTATCTTTTTTTTTATTTATCTTATGAGAAAGGCTTTCTTCCCAA  
CGTAAATCTTTGAGAACTTTAAATGTAACAACCTTCAATTGAATGGTTTCAAGCCCT  
ACCCCTAGTG

PE\_12

ATTATTAGTCAAGAAAGGGGGGAAAAAAGAACCTTTTGGAACCTTAGGAATAATTT  
ATGCTATAATAGCTATCGGATTATTAGGATTCGTAGTTTGAGCTCACCATATATTT  
ACAGTAGGAATAGATGTAGATACCCGAGCTTACTTCACTTCAGCAACTATAATTA  
TTGCGGTTCCAACCTGGGATTAAGTCTTTAGATGACTAGCCACCTTTTCATGGAAC  
TCAAATTTTAAATAGACCAGTAACCCTGTGAGCTTTAGGTTTTGTATTTTTATTTA  
CAGTAGGAGGATTAACAGGGGTAAATTTTAGCTAATTCTTCAATTGATATTATTCTC

CACGATACTTACTATGTAGTAGCTCATTTCCTACTATGTTCTTTCTATAGGAGCTGT  
ATTTGCAATTATAGCCGGAATTGTCCAATGATTCCCATTATTTACCGGACTAACC  
TTAAATAATTTTTTTTTTAAAAACCCAATTTATTACTATATTTTTAGGTGTAAATTTAA  
CATTTTTTCCTCAACACTTTTTAGGGCTAAGAGGAATGCCTCGGCGATATTCGGA  
TTATCCAGATGCTTTCACTATCTGAAATGCCATTTTCATCTATTGGTTCCATTATTT  
CTCTCACAAGAATTATCTTTTTTTTTATTTATCTTATGAGAAAGGCTTTCTTCCCAA  
CGTAAATCTTTGAGAACTTTAAATGTAACAACCTTCAATTGAATGTTTTCAAGCCCT  
ACCCCCTAGTG

PE\_13

ATTATTAGACAAGAAAGGGGGGAAAAAAGAACCTTTTGGAACCTTAGGAATAATTT  
ATGCTATAATAGCTATCGGATTATTAGGATTCGTAGTTTGAGCTCACCATATATTT  
ACAGTAGGAATAGATGTAGATACCCGAGCTTACTTCACTTCAGCAACTATAATTA  
TTGCGGTTCCAACCTGGGATTAAGTCTTTAGATGACTAGCCACCTTTTCATGGAAC  
TCAAATTTTAAATAGACCAGTAACCCTGTGAGCTTTAGGTTTTGTATTTTTATTTA  
CAGTAGGAGGATTAACAGGGGTAAATTTAGCTAATTCTTCAATTGATATTATTCTC  
CACGATACTTACTATGTAGTAGCTCATTTCCTACTATGTTCTTTCTATAGGAGCTGT  
ATTTGCAATTATAGCCGGAATTGTCCAATGATTCCCATTATTTACCGGACTAACC  
TTAAATAATTTTTTTTTTAAAAACCCAATTTATTACTATATTTTTAGGTGTAAATTTAA  
CATTTTTTCCTCAACACTTTTTAGGGCTAAGAGGAATGCCTCGGCGATATTCGGA  
TTATCCAGATGCTTTCACTATCTGAAATGCCATTTTCATCTATTGGTTCCATTATTT  
CTCTCACAAGAATTATCTTTTTTTTTATTTATCTTATGAGAAAGGCTTTCTTCCCAA  
CGTAAATCTTTGAGAACTTTAAATGTAACAACCTTCAATTGAATGTTTTCAAGCCCT  
ACCCCCTAGTG

PE\_15

ATTATTAGACAAGAAAGGGGGGAAAAAAGAACCTTTTGGAACCTTAGGAATAATTT  
ATGCTATAATACCTATCGGATTATTAGGATTCGTAGTTTGAGCTCACCATATATTT  
ACAGTAGGAATAGATGTAGATACCCGAGCTTACTTCACTTCAGCAACTATAATTA  
TTGCGGTTCCAACCTGGGATTAAGTCTTTAGATGACTAGCCACCTTTTCATGGAAC  
TCAAATTTTAAATAGACCAGTAACCCTGTGAGCTTTAGGTTTTGTATTTTTATTTA  
CAGTAGGAGGATTAACAGGGGTAAATTTAGCTAATTCTTCAATTGATATTATTCTC  
CACGATACTTACTATGTAGTAGCTCATTTCCTACTATGTTCTTTCTATAGGAGCTGT  
ATTTGCAATTATAGCCGGAATTGTCCAATGATTCCCATTATTTACCGGACTAACC  
TTAAATAATTTTTTTTTTAAAAACCCAATTTATTACTATATTTTTAGGTGTAAATTTAA  
CATTTTTTCCTCAACACTTTTTAGGGCTAAGAGGAATGCCTCGGCGATATTCGGA  
TTATCCAGATGCTTTCACTATCTGAAATGCCATTTTCATCCATTGGTTCCATTATTT  
CTCTCACAAGAATTATCTTTTTTTTTATTTATCTTATGAGAAAGGCTTTCTTCCCAA  
CGTAAATCTGTGAGAACTTTAAATGTAACAACCTTCAATTGAATGGTTTCAAGCCC  
TACCCCCTAGTG

PE\_16

ATTATTAGACAAGAAAGGGGGGAAAAAAGAAGCTTTTGGAACCTTAGGAATAATTT  
ATGCTATAATAGCTATCGGATTATTAGGATTCGTAGTTTGAGCTCACCATATATTT  
ACAGTAGGAATAGATGTAGATACCCGAGCTTACTTCACTTCAGCAACTATAATTA  
TTGCGGTTCCAACCTGGGATTAAGTCTTTAGATGACTAGCCACCTTTTCATGGAAC  
TCAAATTTTAAATAGACCAGTCACCCTGTGAGCTTTAGGTTTTGTATTTTTATTTA  
CAGTAGGAGGATTAACAGGGGTAAATTTAGCTAATTCTTCAATTGATATTATTCTC  
CACGATACTTACTATGTAGTAGCTCATTTCCTACTATGTTCTTTCTATAGGAGCTGT  
ATTTGCAATTATAGCCGGAATTGTCCAATGATTCCCATTATTTACCGGACTAACC  
TTAAATAATTTTTTTTTTAAAAACCCAATTTATTACTATATTTTTAGGTGTAAATTTAA  
CATTTTTTCCTCAACACTTTTTAGGGCTAAGAGGAATGCCTCGGCGATATTCGGA  
TTATCCAGATGCTTTCACTATCTGAAATGCCATTTTCATCTATTGGTTCCATTATTT



CTCTCACAAGAATTATCTTTTTTTTTATTTATCTTATGAGAAAGGCTTTCTTCCCAA  
CGTAAATCTTTGAGAACTTTAAATGTAACAACCTTCAATTGAATGGTTTCAAGCCCT  
ACCCCCTAGTG

PE\_19

ATTATTAGACAAGAAAGGGGGGAAAAAAGAAGCTTTTGGAACCTTAGGAATAATTT  
ATGCTATAATAGCTATCGGATTATTAGGATTCGTAGTTTGAGCTCACCATATATTT  
ACAGTAGGAATAGATGTAGATACCCGAGCTTACTTCACTTCAGCAACTATAATTA  
TTGCGGTTCCAACCTGGGATTAAGTCTTTAGATGACTAGCCACCTTTCATGGAAC  
TCAAATTTTAAATAGACCAGTCACCCTGTGAGCTTTAGGTTTTGTATTTTTATTTA  
CAGTAGGAGGATTAACAGGGGTAAATTTAGCTAATTCTTCAATTGATATTATTCTC  
CACGATACTTACTATGTAGTAGCTCATTTTCACTATGTTCTTTCTATAGGAGCTGT  
ATTTGCAATTATAGCCGGAATTGTCCAATGATTCCCATTATTTACCGGACTAACC  
TTAAATAATTTTTTTTTTAAAAACCCAATTTATTACTATATTTTTAGGTGTAATTTAA  
CATTTTTTCTCAACACTTTTTAGGGCTAAGAGGAATGCCTCGGCGATATTCGGA  
TTATCCAGATGCTTTCACTATCTGAAATGCCATTTTCATCCATTGGTTCCATTATTT  
CTCTCACAAGAATTATCTTTTTTTTTATTTATCTTATGAGAAAGGCTTTCTTCCCAA  
CGTAAATCTTTGAGAACTTTAAATGTAACAACCTTCAATTGAATGGTTTCAAGCCCT  
ACCCCCTAGTG

PE\_2

ATTATTAGACAAGAAAGGGGGGAAAAAAGAAGCTTTTGGAACCTTAGGAATAATTT  
ATGCTATAATAGCTATCGGATTATTAGGATTCGTAGTTTGAGCTCACCATATATTT  
ACAGTAGGAATAGATGTAGATACCCGAGCTTACTTCACTTCAGCAACTATAATTA  
TTGCGGTTCCAACCTGGGATTAAGTCTTTAGATGACTAGCCACCTTTCATGGAAC  
TCAAATTTTAAATAGACCAGTCACCCTGTGAGCTTTAGGTTTTGTATTTTTATTTA  
CAGTAGGAGGATTAACAGGGGTAAATTTAGCTAATTCTTCAATTGATATTATTCTC  
CACGATACTTACTATGTAGTAGCTCATTTTCACTATGTTCTTTCTATAGGAGCTGT  
ATTTGCAATTATAGCCGGAATTGTCCAATGATTCCCATTATTTACCGGACTAACC  
TTAAATAATTTTTTTTTTAAAAACCCAATTTATTACTATATTTTTAGGTGTAATTTAA  
CATTTTTTCTCAACACTTTTTAGGGCTAAGAGGAATGCCTCGGCGATATTCGGA  
TTATCCAGATGCTTTCACTATCTGAAATGCCATTTTCATCTATTGGTTCCATTATTT  
CTCTCACAAGAATTATCTTTTTTTTTATTTATCTTATGAGAAAGGCTTTCTTCCCAA  
CGTAAATCTTTGAGAACTTTAAATGTAACAACCTTCAATTGAATGGTTTCAAGCCCT  
ACCCCCTAGTG

PE\_23

ATTATTAGACAAGAAAGGGGGGAAAAAAGAAGCTTTTGGAACCTTAGGAATAATTT  
ATGCTATAATAGCTATCGGATTATTAGGATTCGTAGTTTGAGCTCACCATATATTT  
ACAGTAGGAATAGATGTAGATACCCGAGCTTACTTCACTTCAGCAACTATAATTA  
TTGCGGTTCCAACCTGGGATTAAGTCTTTAGATGACTAGCCACCTTTCATGGAAC  
TCAAATTTTAAATAGACCAGTAACCCTGTGAGCTTTAGGTTTTGTATTTTTATTTA  
CAGTAGGAGGATTAACAGGGGTAAATTTAGCTAATTCTTCAATTGATATTATTCTC  
CACGATACTTACTATGTAGTAGCTCATTTTCACTATGTTCTTTCTATAGGAGCTGT  
ATTTGCAATTATAGCCGGAATTGTCCAATGATTCCCATTATTTACCGGACTAACC  
TTAAATAATTTTTTTTTTAAAAACCCAATTTATTACTATATTTTTAGGTGTAATTTAA  
CATTTTTTCTCAACACTTTTTAGGGCTAAGAGGAATGCCTCGGCGATATTCGGA  
TTATCCAGATGCTTTCACTATCTGAAATGCCATTTTCATCTATTGGTTCCATTATTT  
CTCTCACAAGAATTATCTTTTTTTTTATTTATCTTATGAGAAAGGCTTTCTTCCCAA  
CGTAAATCTTTGAGAACTTTAAATGTAACAACCTTCAATTGAATGGTTTCAAGCCCT  
ACCCCCTAGTG

PE\_29

ATTATTAGACAAGAAAGGGGGGAAAAAAGAAGCTTTTGGAACCTTAGGAATAATTT

ATGCTATAATAGCTATCGGATTATTAGGATTCGTAGTTTGAGCTCACCATATATTT  
ACAGTAGGAATAGATGTAGATACCCGAGCTTACTTCACTTCAGCAACTATAATTA  
TTGCGGTTCCAACCTGGGATTAAGTCTTTAGATGACTAGCCACCTTTTCATGGAAC  
TCAAATTTTAAATAGACCAGTCACCCTGTGAGCTTTAGGTTTTGTATTTTTATTTA  
CAGTAGGAGGATTAACAGGGGTAAATTTTAGCTAATTCTTCAATTGATATTATTCTC  
CACGATACTTACTATGTAGTAGCTCATTTTCACTATGTTCTTTCTATAGGAGCTGT  
ATTTGCAATTATAGCCGGAATTGTCCAATGATTCCCATTATTTACCGGACTAACC  
TTAAATAATTTTTTTTTTAAAAACCCAATTTATTACTATATTTTTAGGTGTAAATTTAA  
CATTTTTTCTCAACACTTTTTAGGGCTAAGAGGAATGCCTCGGCGATATTCGGA  
TTATCCAGATGCTTTCACTATCTGAAATGCCATTTTCATCTATTGGTTCCATTATTT  
CTCTCACAAGAATTATCTTTTTTTTTATTTATCTTATGAGAAAGGCTTTCTTCCCAA  
CGTAAATCTTTGAGAACTTTAAATGTAACAACCTTCAATTGAATGGTTTCAAGCCCT  
ACCCCTAGTG

PE\_6

ATTATTAGACAAGAAAGGGGGGAAAAAAGAAGCTTTTGGAACCTTAGGAATAATTT  
ATGCTATAATAGCTATCGGATTATTAGGATTCGTAGTTTGAGCTCACCATATATTT  
ACAGTAGGAATAGATGTAGATACCCGAGCTTACTTCACTTCAGCAACTATAATTA  
TTGCGGTTCCAACCTGGGATTAAGTCTTTAGATGACTAGCCACCTTTTCATGGAAC  
TCAAATTTTAAATAGACCAGTAACCCTGTGAGCTTTAGGTTTTGTATTTTTATTTA  
CAGTAGGAGGATTAACAGGGGTAAATTTTAGCTAATTCTTCAATTGATATTATTCTC  
CACGATACTTACTATGTAGTAGCTCATTTTCACTATGTTCTTTCTATAGGAGCTGT  
ATTTGCAATTATAGCCGGAATTGTCCAATGATTCCCATTATTTACCGGACTAACC  
TTAAATAATTTTTTTTTTAAAAACCCAATTTATTACTATATTTTTAGGTGTAAATTTAA  
CATTTTTTCTCAACACTTTTTAGGGCTAAGAGGAATGCCTCGGCGATATTCGGA  
TTATCCAGATGCTTTCACTATCTGAAATGCCATTTTCATCTATTGGTTCCATTATTT  
CTCTCACAAGAATTATCTTTTTTTTTATTTATCTTATGAGAAAGGCTTTCTTCCCAA  
CGTAAATCTTTGAGAACTTTAAATGTAACAACCTTCAATTGAATGGTTTCAAGCCCT  
ACCCCTAGTG

PE\_8

ATTATTAGACAAGAAAGGGGGGAAAAAAGAAGCTTTTGGAACCTTAGGAATAATTT  
ATGCTATAATAGCTATCGGATTATTAGGATTCGTAGTTTGAGCTCACCATATATTT  
ACAGTAGGAATAGATGTAGATACCCGAGCTTACTTCACTTCAGCAACTATAATTA  
TTGCGGTTCCAACCTGGGATTAAGTCTTTAGATGACTAGCCACCTTTTCATGGAAC  
TCAAATTTTAAATAGACCAGTAACCCTGTGAGCTTTAGGTTTTGTATTTTTATTTA  
CAGTAGGAGGATTAACAGGGGTAAATTTTAGCTAATTCTTCAATTGATATTATTCTC  
CACGATACTTACTATGTAGTAGCTCATTTTCACTATGTTCTTTCTATAGGAGCTGT  
ATTTGCAATTATAGCCGGAATTGTCCAATGATTCCCATTATTTACCGGACTAACC  
TTAAATAATTTTTTTTTTAAAAACCCAATTTATTACTATATTTTTAGGTGTAAATTTAA  
CATTTTTTCTCAACACTTTTTAGGGCTAAGAGGAATGCCTCGGCGATATTCGGA  
TTATCCAGATGCTTTCACTATCTGAAATGCCATTTTCATCTATTGGTTCCATTATTT  
CTCTCACAAGAATTATCTTTTTTTTTATTTATCTTATGAGAAAGGCTTTCTTCCCAA  
CGTAAATCTTTGAGAACTTTAAATGTAACAACCTTCAATTGAATGGTTTCAAGCCCT  
ACCCCTAGTG

CL1\_1

ATTATTAGACAAGAAAGGGGGGAAAAAAGAAGCTTTTGGAACCTTAGGAATAATTT  
ATGCTATAATAGCTATCGGATTATTAGGATTCGTAGTTTGAGCTCACCATATATTT  
ACAGTAGGAATAGATGTAGATACCCGAGCTTACTTCACTTCAGCAACTATAATTA  
TTGCGGTTCCAACCTGGGATTAAGTCTTTAGATGACTAGCCACCTTTTCATGGAAC  
TCAAATTTTAAATAGACCAGTAACCCTGTGAGCTTTAGGTTTTGTATTTTTATTTA  
CAGTAGGAGGATTAACAGGGGTAAATTTTAGCTAATTCTTCAATTGATATTATTCTC

CACGATACTTACTATGTAGTAGCTCATTTTTCACTATGTTCTTTCTATAGGAGCTGT  
ATTTGCAATTATAGCCGGAATTGTCCAATGATTCCCATTATTTACCGGACTAACC  
TTAAATAATTTTTTTTTTAAAAACCCAATTTATTACTATATTTTTAGGTGTAAATTTAA  
CATTTTTTCCTCAACACTTTTTAGGGCTAAGAGGAATGCCTCGGCGATATTCGGA  
TTATCCAGATGCTTTCACTATCTGAAATGCCATTTTCATCTATTGGTTCCATTATTT  
CTCTCACAAGAATTATCTTTTTTTTTATTTATCTTATGAGAAAGGCTTTCTTCCCAA  
CGTAAATCTTTGAGAACTTTAAATGTAACAACCTTCAATTGAATGTTTTCAAGCCCT  
ACCCCCTAGTG

CL1\_2

ATTATTAGACAAGAAAGGGGGGAAAAAAGAAGCTTTTTGGAACCTTAGGAATAATTT  
ATGCTATAATAGCTATCGGATTATTAGGATTCGTAGTTTGAGCTCACCATATATTT  
ACAGTAGGAATAGATGTAGATACCCGAGCTTACTTCACTTCAGCAACTATAATTA  
TTGCGGTTCCAACCTGGGATTAAGTCTTTAGATGACTAGCCACCTTTTCATGGAAC  
TCAAATTTTAAATAGACCAGTAACCCTGTGAGCTTTAGGTTTTGTATTTTTATTTA  
CAGTAGGAGGATTAACAGGGGTAAATTTAGCTAATTCTTCAATTGATATTATTCTC  
CACGATACTTACTATGTAGTAGCTCATTTTTCACTATGTTCTTTCTATAGGAGCTGT  
ATTTGCAATTATAGCCGGAATTGTCCAATGATTCCCATTATTTACCGGACTAACC  
TTAAATAATTTTTTTTTTAAAAACCCAATTTATTACCATATTTTTAGGTGTAAATTTAA  
CATTTTTTCCTCAACACTTTTTAGGGCTAAGAGGAATGCCTCGGCGATATTCGGA  
TTATCCAGATGCTTTCACTATCTGAAATGCCATTTTCATCTATTGGTTCCATTATTT  
CTCTCACAAGAATTATCTTTTTTTTTATTTATCTTATGAGAAAGGCTTTCTTCCCAA  
CGTAAATCTTTGAGAACTTTAAATGTAACAACCTTCAATTGAATGTTTTCAAGCCCT  
ACCCCCTAGTG

CL1\_3

ATTATTAGACAAGAAAGGGGGGAAAAAAGAAGCTTTTTGGAACCTTAGGAATAATTT  
ATGCTATAATAGCTATCGGATTATTAGGATTCGTAGTTTGAGCTCACCATATATTT  
ACAGTAGGAATAGATGTAGATACCCGAGCTTACTTCACTTCAGCAACTATAATTA  
TTGCGGTTCCAACCTGGGATTAAGTCTTTAGATGACTAGCCACCTTTTCATGGAAC  
TCAAATTTTAAATAGACCAGTAACCCTGTGAGCTTTAGGTTTTGTATTTTTATTTA  
CAGTAGGAGGATTAACAGGGGTAAATTTAGCTAATTCTTCAATTGATATTATTCTC  
CACGATACTTACTATGTAGTAGCTCATTTTTCACTATGTTCTTTCTATAGGAGCTGT  
ATTTGCAATTATAGCCGGAATTGTCCAATGATTCCCATTATTTACCGGACTAACC  
TTAAATAATTTTTTTTTTAAAAACCCAATTTATTACTATATTTTTAGGTGTAAATTTAA  
CATTTTTTCCTCAACACTTTTTAGGGCTAAGAGGAATGCCTCGGCGATATTCGGA  
TTATCCAGATGCTTTCACTATCTGAAATGCCATTTTCATCTATTGGTTCCATTATTT  
CTCTCACAAGAATTATCTTTTTTTTTATTTATCTTATGAGAAAGGCTTTCTTCCCAA  
CGTAAATCTTTGAGAACTTTAAATGTAACAACCTTCAATTGAATGTTTTCAAGCCCT  
ACCCCCTAGTG

CL1\_4

ATTATTAGACAAGAAAGGGGGGAAAAAAGAAGCTTTTTGGAACCTTAGGAATAATTT  
ATGCTATAATAGCTATCGGATTATTAGGATTCGTAGTTTGAGCTCACCATATATTT  
ACAGTAGGAATAGATGTAGATACCCGAGCTTACTTCACTTCAGCAACTATAATTA  
TTGCGGTTCCAACCTGGGATTAAGTCTTTAGATGACTAGCCACCTTTTCATGGAAC  
TCAAATTTTAAATAGACCAGTAACCCTGTGAGCTTTAGGTTTTGTATTTTTATTTA  
CAGTAGGAGGATTAACAGGGGTAAATTTAGCTAATTCTTCAATTGATATTATTCTC  
CACGATACTTACTATGTAGTAGCTCATTTTTCACTATGTTCTTTCTATAGGAGCTGT  
ATTTGCAATTATAGCCGGAATTGTCCAATGATTCCCATTATTTACCGGACTAACC  
TTAAATAATTTTTTTTTTAAAAACCCAATTTATTACTATATTTTTAGGTGTAAATTTAA  
CATTTTTTCCTCAACACTTTTTAGGGCTAAGAGGAATGCCTCGGCGATATTCGGA  
TTATCCAGATGCTTTCACTATCTGAAATGCCATTTTCATCTATTGGTTCCATTATTT

CTCTCACAAGAATTATCTTTTTTTTTATTTATCTTATGAGAAAGGCTTTCTTCCCAA  
CGTAAATCTTTGAGAACTTTAAATGTAACAACCTTCAATTGAATGGTTTCAAGCCCT  
ACCCCCTAGTG

CL1\_5

ATTATTAGACAAGAAAGGGGGGAAAAAAGAAGCTTTTGGAACCTTAGGAATAATTT  
ATGCTATAATAGCTATCGGATTATTAGGATTCGTAGTTTGAGCTCACCATATATTT  
ACAGTAGGAATAGATGTAGATACCCGAGCTTACTTCACTTCAGCAACTATAATTA  
TTGCGGTTCCAACCTGGGATTAAGTCTTTAGATGACTAGCCACCTTTCATGGAAC  
TCAAATTTTAAATAGACCAGTAACCCTGTGAGCTTTAGGTTTTGTATTTTTATTTA  
CAGTAGGAGGATTAACAGGGGTAAATTTAGCTAATTCTTCAATTGATATTATTCTC  
CACGATACTTACTATGTAGTAGCTCATTTCCTATGTTCTTTCTATAGGAGCTGT  
ATTTGCAATTATAGCCGGAATTGTCCAATGATTCCCATTATTTACCGGACTAACC  
TTAAATAATTTTTTTTTTAAAAACCCAATTTATTACCATATTTTTAGGTGTAATTTAA  
CATTTTTTCTCAACACTTTTTAGGGCTAAGAGGAATGCCTCGGCGATATTCGGA  
TTATCCAGATGCTTTCCTATCTGAAATGCCATTTTCTATTGGTTCCATTATTT  
CTCTCACAAGAATTATCTTTTTTTTTATTTATCTTATGAGAAAGGCTTTCTTCCCAA  
CGTAAATCTTTGAGAACTTTAAATGTAACAACCTTCAATTGAATGGTTTCAAGCCCT  
ACCCCCTAGTG

CL1\_6

ATTATTAGACAAGAAAGGGGGGAAAAAAGAAGCTTTTGGAACCTTAGGAATAATTT  
ATGCTATAATAGCTATCGGATTATTAGGATTCGTAGTTTGAGCTCACCATATATTT  
ACAGTAGGAATAGATGTAGATACCCGAGCTTACTTCACTTCAGCAACTATAATTA  
TTGCGGTTCCAACCTGGGATTAAGTCTTTAGATGACTAGCCACCTTTCATGGAAC  
TCAAATTTTAAATAGACCAGTAACCCTGTGAGCTTTAGGTTTTGTATTTTTATTTA  
CAGTAGGAGGATTAACAGGGGTAAATTTAGCTAATTCTTCAATTGATATTATTCTC  
CACGATACTTACTATGTAGTAGCTCATTTCCTATGTTCTTTCTATAGGAGCTGT  
ATTTGCAATTATAGCCGGAATTGTCCAATGATTCCCATTATTTACCGGACTAACC  
TTAAATAATTTTTTTTTTAAAAACCCAATTTATTACCATATTTTTAGGTGTAATTTAA  
CATTTTTTCTCAACACTTTTTAGGGCTAAGAGGAATGCCTCGGCGATATTCGGA  
TTATCCAGATGCTTTCCTATCTGAAATGCCATTTTCTATTGGTTCCATTATTT  
CTCTCACAAGAATTATCTTTTTTTTTATTTATCTTATGAGAAAGGCTTTCTTCCCAA  
CGTAAATCTTTGAGAACTTTAAATGTAACAACCTTCAATTGAATGGTTTCAAGCCCT  
ACCCCCTAGTG

CL1\_7

ATTATTAGACAAGAAAGGGGGGAAAAAAGAAGCTTTTGGAACCTTAGGAATAATTT  
ATGCTATAATAGCTATCGGATTATTAGGATTCGTAGTTTGAGCTCACCATATATTT  
ACAGTAGGAATAGATGTAGATACCCGAGCTTACTTCACTTCAGCAACTATAATTA  
TTGCGGTTCCAACCTGGGATTAAGTCTTTAGATGACTAGCCACCTTTCATGGAAC  
TCAAATTTTAAATAGACCAGTAACCCTGTGAGCTTTAGGTTTTGTATTTTTATTTA  
CAGTAGGAGGATTAACAGGGGTAAATTTAGCTAATTCTTCAATTGATATTATTCTC  
CACGATACTTACTATGTAGTAGCTCATTTCCTATGTTCTTTCTATAGGAGCTGT  
ATTTGCAATTATAGCCGGAATTGTCCAATGATTCCCATTATTTACCGGACTAACC  
TTAAATAATTTTTTTTTTAAAAACCCAATTTATTACTATATTTTTAGGTGTAATTTAA  
CATTTTTTCTCAACACTTTTTAGGGCTAAGAGGAATGCCTCGGCGATATTCGGA  
TTATCCAGATGCTTTCCTATCTGAAATGCCATTTTCTATTGGTTCCATTATTT  
CTCTCACAAGAATTATCTTTTTTTTTATTTATCTTATGAGAAAGGCTTTCTTCCCAA  
CGTAAATCTTTGAGAACTTTAAATGTAACAACCTTCAATTGAATGGTTTCAAGCCCT  
ACCCCCTAGTG

CL1\_8

ATTATTAGACAAGAAAGGGGGGAAAAAAGAAGCTTTTGGAACCTTAGGAATAATTT

ATGCTATAATAGCTATCGGATTATTAGGATTCGTAGTTTGAGCTCACCATATATTT  
ACAGTAGGAATAGATGTAGATACCCGAGCTTACTTCACTTCAGCAACTATAATTA  
TTGCGGTTCCAACCTGGGATTAAGTCTTTAGATGACTAGCCACCTTTTCATGGAAC  
TCAAATTTTAAATAGACCAGTAACCCTGTGAGCTTTAGGTTTTGTATTTTTATTTA  
CAGTAGGAGGATTAACAGGGGTAAATTTTAGCTAATTCTTCAATTGATATTATTCTC  
CACGATACTTACTATGTAGTAGCTCATTTTCACTATGTTCTTTCTATAGGAGCTGT  
ATTTGCAATTATAGCCGGAATTGTCCAATGATTCCCATTATTTACCGGACTAACC  
TTAAATAATTTTTTTTTTAAAAACCCAATTTATTACCATATTTTTAGGTGTAAATTTAA  
CATTTTTTCTCAACACTTTTTAGGGCTAAGAGGAATGCCTCGGCGATATTCGGA  
TTATCCAGATGCTTTCACTATCTGAAATGCCATTTTCATCTATTGGTTCCATTATTT  
CTCTCACAAGAATTATCTTTTTTTTTATTTATCTTATGAGAAAGGCTTTCTTCCCAA  
CGTAAATCTTTGAGAACTTTAAATGTAACAACCTTCAATTGAATGGTTTCAAGCCCT  
ACCCCTAGTG

CL1\_9

ATTATTAGACAAGAAAGGGGGGAAAAAAGAAGCTTTTGGAACCTTAGGAATAATTT  
ATGCTATAATAGCTATCGGATTATTAGGATTCGTAGTTTGAGCTCACCATATATTT  
ACAGTAGGAATAGATGTAGATACCCGAGCTTACTTCACTTCAGCAACTATAATTA  
TTGCGGTTCCAACCTGGGATTAAGTCTTTAGATGACTAGCCACCTTTTCATGGAAC  
TCAAATTTTAAATAGACCAGTAACCCTGTGAGCTTTAGGTTTTGTATTTTTATTTA  
CAGTAGGAGGATTAACAGGGGTAAATTTTAGCTAATTCTTCAATTGATATTATTCTC  
CACGATACTTACTATGTAGTAGCTCATTTTCACTATGTTCTTTCTATAGGAGCTGT  
ATTTGCAATTATAGCCGGAATTGTCCAATGATTCCCATTATTTACCGGACTAACC  
TTAAATAATTTTTTTTTTAAAAACCCAATTTATTACTATATTTTTAGGTGTAAATTTAA  
CATTTTTTCTCAACACTTTTTAGGGCTAAGAGGAATGCCTCGGCGATATTCGGA  
TTATCCAGATGCTTTCACTATCTGAAATGCCATTTTCATCTATTGGTTCCATTATTT  
CTCTCACAAGAATTATCTTTTTTTTTATTTATCTTATGAGAAAGGCTTTCTTCCCAA  
CGTAAATCTTTGAGAACTTTAAATGTAACAACCTTCAATTGAATGGTTTCAAGCCCT  
ACCCCTAGTG

CL2\_3

ATTATTAGACAAGAAAGGGGGGAAAAAAGAAGCTTTTGGAACCTTAGGAATAATTT  
ATGCTATAATAGCTATCGGATTATTAGGATTCGTAGTTTGAGCTCACCATATATTT  
ACAGTAGGAATAGATGTAGATACCCGAGCTTACTTCACTTCAGCAACTATAATTA  
TTGCGGTTCCAACCTGGGATTAAGTCTTTAGATGACTAGCCACCTTTTCATGGAAC  
TCAAATTTTAAATAGACCAGTAACCCTGTGAGCTTTAGGTTTTGTATTTTTATTTA  
CAGTAGGAGGATTAACAGGGGTAAATTTTAGCTAATTCTTCAATTGATATTATTCTC  
CACGATACTTACTATGTAGTAGCTCATTTTCACTATGTTCTTTCTATAGGAGCTGT  
ATTTGCAATTATAGCCGGAATTGTCCAATGATTCCCATTATTTACCGGACTAACC  
TTAAATAATTTTTTTTTTAAAAACCCAATTTATTACTATATTTTTAGGTGTAAATTTAA  
CATTTTTTCTCAACACTTTTTAGGGCTAAGAGGAATGCCTCGGCGATATTCGGA  
TTATCCAGATGCTTTCACTATCTGAAATGCCATTTTCATCTATTGGTTCCATTATTT  
CTCTCACAAGAATTATCTTTTTTTTTATTTATCTTATGAGAAAGGCTTTCTTCCCAA  
CGTAAATCTTTGAGAACTTTAAATGTAACAACCTTCAATTGAATGGTTTCAAGCCCT  
ACCCCTAGTG

CL2\_4

ATTATTAGACAAGAAAGGGGGGAAAAAAGAAGCTTTTGGAACCTTAGGAATAATTT  
ATGCTATAATAGCTATCGGATTATTAGGATTCGTAGTTTGAGCTCACCATATATTT  
ACAGTAGGAATAGATGTAGATACCCGAGCTTACTTCACTTCAGCAACTATAATTA  
TTGCGGTTCCAACCTGGGATTAAGTCTTTAGATGACTAGCCACCTTTTCATGGAAC  
TCAAATTTTAAATAGACCAGTAACCCTGTGAGCTTTAGGTTTTGTATTTTTATTTA  
CAGTAGGAGGATTAACAGGGGTAAATTTTAGCTAATTCTTCAATTGATATTATTCTC

CACGATACTTACTATGTAGTAGCTCATTTCCTACTATGTTCTTTCTATAGGAGCTGT  
ATTTGCAATTATAGCCGGAATTGTCCAATGATTCCCATTATTTACCGGACTAACC  
TTAAATAATTTTTTTTTTAAAAACCCAATTTATTACTATATTTTTAGGTGTAAATTTAA  
CATTTTTTCCTCAACACTTTTTAGGGCTAAGAGGAATGCCTCGGCGATATTCGGA  
TTATCCAGATGCTTTCACTATCTGAAATGCCATTTTCATCTATTGGTTCCATTATTT  
CTCTCACAAGAATTATCTTTTTTTTTATTTATCTTATGAGAAAGGCTTTCTTCCCAA  
CGTAAATCTTTGAGAACTTTAAATGTAACAACCTTCAATTGAATGTTTTCAAGCCCT  
ACCCCCTAGTG

CL2\_5

ATTATTAGACAAGAAAGGGGGGAAAAAAGAAGCTTTTGGAACCTTAGGAATAATTT  
ATGCTATAATAGCTATCGGATTATTAGGATTCGTAGTTTGAGCTCACCATATATTT  
ACAGTAGGAATAGATGTAGATACCCGAGCTTACTTCACTTCAGCAACTATAATTA  
TTGCGGTTCCAACCTGGGATTAAGTCTTTAGATGACTAGCCACCTTTTCATGGAAC  
TCAAATTTTAAATAGACCAGTAACCCTGTGAGCTTTAGGTTTTGTATTTTTATTTA  
CAGTAGGAGGATTAACAGGGGTAAATTTAGCTAATTCTTCAATTGATATTATTCTC  
CACGATACTTACTATGTAGTAGCTCATTTCCTACTATGTTCTTTCTATAGGAGCTGT  
ATTTGCAATTATAGCCGGAATTGTCCAATGATTCCCATTATTTACCGGACTAACC  
TTAAATAATTTTTTTTTTAAAAACCCAATTTATTACTATATTTTTAGGTGTAAATTTAA  
CATTTTTTCCTCAACACTTTTTAGGGCTAAGAGGAATGCCTCGGCGATATTCGGA  
TTATCCAGATGCTTTCACTATCTGAAATGCCATTTTCATCTATTGGTTCCATTATTT  
CTCTCACAAGAATTATCTTTTTTTTTATTTATCTTATGAGAAAGGCTTTCTTCCCAA  
CGTAAATCTTTGAGAACTTTAAATGTAACAACCTTCAATTGAATGTTTTCAAGCCCT  
ACCCCCTAGTG

CL2\_6

ATTATTAGACAAGAAAGGGGGGAAAAAAGAAGCTTTTGGAACCTTAGGAATAATTT  
ATGCTATAATAGCTATCGGATTATTAGGATTCGTAGTTTGAGCTCACCATATATTT  
ACAGTAGGAATAGATGTAGATACCCGAGCTTACTTCACTTCAGCAACTATAATTA  
TTGCGGTTCCAACCTGGGATTAAGTCTTTAGATGACTAGCCACCTTTTCATGGAAC  
TCAAATTTTAAATAGACCAGTAACCCTGTGAGCTTTAGGTTTTGTATTTTTATTTA  
CAGTAGGAGGATTAACAGGGGTAAATTTAGCTAATTCTTCAATTGATATTATTCTC  
CACGATACTTACTATGTAGTAGCTCATTTCCTACTATGTTCTTTCTATAGGAGCTGT  
ATTTGCAATTATAGCCGGAATTGTCCAATGATTCCCATTATTTACCGGACTAACC  
TTAAATAATTTTTTTTTTAAAAACCCAATTTATTACTATATTTTTAGGTGTAAATTTAA  
CATTTTTTCCTCAACACTTTTTAGGGCTAAGAGGAATGCCTCGGCGATATTCGGA  
TTATCCAGATGCTTTCACTATCTGAAATGCCATTTTCATCTATTGGTTCCATTATTT  
CTCTCACAAGAATTATCTTTTTTTTTATTTATCTTATGAGAAAGGCTTTCTTCCCAA  
CGTAAATCTTTGAGAACTTTAAATGTAACAACCTTCAATTGAATGTTTTCAAGCCCT  
ACCCCCTAGTG

CL2\_7

ATTATTAGACAAGAAAGGGGGGAAAAAAGAAGCTTTTGGAACCTTAGGAATAATTT  
ATGCTATAATAGCTATCGGATTATTAGGATTCGTAGTTTGAGCTCACCATATATTT  
ACAGTAGGAATAGATGTAGATACCCGAGCTTACTTCACTTCAGCAACTATAATTA  
TTGCGGTTCCAACCTGGGATTAAGTCTTTAGATGACTAGCCACCTTTTCATGGAAC  
TCAAATTTTAAATAGACCAGTAACCCTGTGAGCTTTAGGTTTTGTATTTTTATTTA  
CAGTAGGAGGATTAACAGGGGTAAATTTAGCTAATTCTTCAATTGATATTATTCTC  
CACGATACTTACTATGTAGTAGCTCATTTCCTACTATGTTCTTTCTATAGGAGCTGT  
ATTTGCAATTATAGCCGGAATTGTCCAATGATTCCCATTATTTACCGGACTAACC  
TTAAATAATTTTTTTTTTAAAAACCCAATTTATTACTATATTTTTAGGTGTAAATTTAA  
CATTTTTTCCTCAACACTTTTTAGGGCTAAGAGGAATGCCTCGGCGATATTCGGA  
TTATCCAGATGCTTTCACTATCTGAAATGCCATTTTCATCTATTGGTTCCATTATTT

CTCTCACAAGAATTATCTTTTTTTTATTTATCTTATGAGAAAGGCTTTCTTCCCAA  
CGTAAATCTTTGAGAACTTTAAATGTAACAACCTTCAATTGAATGGTTTCAAGCCCT  
ACCCCCTAGTG

CL2\_8

ATTATTAGACAAGAAAGGGGGGAAAAAAGAAGCTTTTGGAACCTTAGGAATAATTT  
ATGCTATAATAGCTATCGGATTATTAGGATTCGTAGTTTGAGCTCACCATATATTT  
ACAGTAGGAATAGATGTAGATACCCGAGCTTACTTCACTTCAGCAACTATAATTA  
TTGCGGTTCCAACCTGGGATTAAGTCTTTAGATGACTAGCCACCTTTCATGGAAC  
TCAAATTTTAAATAGACCAGTAACCCTGTGAGCTTTAGGTTTTGTATTTTTATTTA  
CAGTAGGAGGATTAACAGGGGTAAATTTAGCTAATTCTTCAATTGATATTATTCTC  
CACGATACTTACTATGTAGTAGCTCATTTTCACTATGTTCTTTCTATAGGAGCTGT  
ATTTGCAATTATAGCCGGAATTGTCCAATGATTCCCATTATTTACCGGACTAACC  
TTAAATAATTTTTTTTTTAAAAACCCAATTTATTACTATATTTTTAGGTGTAATTTAA  
CATTTTTTCTCAACACTTTTTAGGGCTAAGAGGAATGCCTCGGCGATATTCGGA  
TTATCCAGATGCTTTCACTATCTGAAATGCCATTTTCTATTGGTTCCATTATTT  
CTCTCACAAGAATTATCTTTTTTTTATTTATCTTATGAGAAAGGCTTTCTTCCCAA  
CGTAAATCTTTGAGAACTTTAAATGTAACAACCTTCAATTGAATGGTTTCAAGCCCT  
ACCCCCTAGTG

CL2\_1

ATTATTAGACAAGAAAGGGGGGAAAAAAGAAGCTTTTGGAACCTTAGGAATAATTT  
ATGCTATAATAGCTATCGGATTATTAGGATTCGTAGTTTGAGCTCACCATATATTT  
ACAGTAGGAATAGATGTAGATACCCGAGCTTACTTCACTTCAGCAACTATAATTA  
TTGCGGTTCCAACCTGGGATTAAGTCTTTAGATGACTAGCCACCTTTCATGGAAC  
TCAAATTTTAAATAGACCAGTAACCCTGTGAGCTTTAGGTTTTGTATTTTTATTTA  
CAGTAGGAGGATTAACAGGGGTAAATTTAGCTAATTCTTCAATTGATATTATTCTC  
CACGATACTTACTATGTAGTAGCTCATTTTCACTATGTTCTTTCTATAGGAGCTGT  
ATTTGCAATTATAGCCGGAATTGTCCAATGATTCCCATTATTTACCGGACTAACC  
TTAAATAATTTTTTTTTTAAAAACCCAATTTATTACTATATTTTTAGGTGTAATTTAA  
CATTTTTTCTCAACACTTTTTAGGGCTAAGAGGAATGCCTCGGCGATATTCGGA  
TTATCCAGATGCTTTCACTATCTGAAATGCCATTTTCTATTGGTTCCATTATTT  
CTCTCACAAGAATTATCTTTTTTTTATTTATCTTATGAGAAAGGCTTTCTTCCCAA  
CGTAAATCTTTGAGAACTTTAAATGTAACAACCTTCAATTGAATGGTTTCAAGCCCT  
ACCCCCTAGTG

CL2\_2

ATTATTAGACAAGAAAGGGGGGAAAAAAGAAGCTTTTGGAACCTTAGGAATAATTT  
ATGCTATAATAGCTATCGGATTATTAGGATTCGTAGTTTGAGCTCACCATATATTT  
ACAGTAGGAATAGATGTAGATACCCGAGCTTACTTCACTTCAGCAACTATAATTA  
TTGCGGTTCCAACCTGGGATTAAGTCTTTAGATGACTAGCCACCTTTCATGGAAC  
TCAAATTTTAAATAGACCAGTAACCCTGTGAGCTTTAGGTTTTGTATTTTTATTTA  
CAGTAGGAGGATTAACAGGGGTAAATTTAGCTAATTCTTCAATTGATATTATTCTC  
CACGATACTTACTATGTAGTAGCTCATTTTCACTATGTTCTTTCTATAGGAGCTGT  
ATTTGCAATTATAGCCGGAATTGTCCAATGATTCCCATTATTTACCGGACTAACC  
TTAAATAATTTTTTTTTTAAAAACCCAATTTATTACTATATTTTTAGGTGTAATTTAA  
CATTTTTTCTCAACACTTTTTAGGGCTAAGAGGAATGCCTCGGCGATATTCGGA  
TTATCCAGATGCTTTCACTATCTGAAATGCCATTTTCTATTGGTTCCATTATTT  
CTCTCACAAGAATTATCTTTTTTTTATTTATCTTATGAGAAAGGCTTTCTTCCCAA  
CGTAAATCTTTGAGAACTTTAAATGTAACAACCTTCAATTGAATGGTTTCAAGCCCT  
ACCCCCTAGTG

EQ1\_3

ATTATTAGACAAGAAAGGGGGGAAAAAAGAAGCTTTTGGAACCTTAGGAATAATTT

ATGCTATAATAGCTATCGGATTATTAGGATTCGTAGTTTGAGCTCACCATATATTT  
ACAGTAGGAATAGATGTAGATACCCGAGCTTACTTCACTTCAGCAACTATAATTA  
TTGCGGTTCCAACCTGGGATTAAGTCTTTAGATGACTAGCCACCTTTTCATGGAAC  
TCAAATTTTAAATAGACCAGTAACCCTGTGAGCTTTAGGTTTTGTATTTTTATTTA  
CAGTAGGAGGATTAACAGGGGTAAATTTTAGCTAATTCTTCAATTGATATTATTCTC  
CACGATACTTACTATGTAGTAGCTCATTTTCACTATGTTCTTTCTATAGGAGCTGT  
ATTTGCAATTATAGCCGGAATTGTCCAATGATTCCCATTATTTACCGGACTAACC  
TTAAATAATTTTTTTTTTAAAAACCCAATTTATTACTATATTTTTAGGTGTAAATTTAA  
CATTTTTTCTCAACACTTTTTAGGGCTAAGAGGAATGCCTCGGCGATATTCGGA  
TTATCCAGATGCTTTCACTATCTGAAATGCCATTTTCATCTATTGGTTCCATTATTT  
CTCTCACAAGAATTATCTTTTTTTTTATTTATCTTATGAGAAAGGCTTTCTTCCCAA  
CGTAAATCTTTGAGAACTTTAAATGTAACAACCTTCAATTGAATGGTTTCAAGCCCT  
ACCCCTAGTG

EQ1\_6

ATTATTAGACAAGAAAGGGGGGAAAAAAGAAGCTTTTGGAACCTTAGGAATAATTT  
ATGCTATAATAGCTATCGGATTATTAGGATTCGTAGTTTGAGCTCACCATATATTT  
ACAGTAGGAATAGATGTAGATACCCGAGCTTACTTCACTTCAGCAACTATAATTA  
TTGCGGTTCCAACCTGGGATTAAGTCTTTAGATGACTAGCCACCTTTTCATGGAAC  
TCAAATTTTAAATAGACCAGTAACCCTGTGAGCTTTAGGTTTTGTATTTTTATTTA  
CAGTAGGAGGATTAACAGGGGTAAATTTTAGCTAATTCTTCAATTGATATTATTCTC  
CACGATACTTACTATGTAGTAGCTCATTTTCACTATGTTCTTTCTATAGGAGCTGT  
ATTTGCAATTATAGCCGGAATTGTCCAATGATTCCCATTATTTACCGGACTAACC  
TTAAATAATTTTTTTTTTAAAAACCCAATTTATTACTATATTTTTAGGTGTAAATTTAA  
CATTTTTTCTCAACACTTTTTAGGGCTAAGAGGAATGCCTCGGCGATATTCGGA  
TTATCCAGATGCTTTCACTATCTGAAATGCCATTTTCATCTATTGGTTCCATTATTT  
CTCTCACAAGAATTATCTTTTTTTTTATTTATCTTATGAGAAAGGCTTTCTTCCCAA  
CGTAAATCTTTGAGAACTTTAAATGTAACAACCTTCAATTGAATGGTTTCAAGCCCT  
ACCCCTAGTG

EQ1\_7

ATTATTAGACAAGAAAGGGGGGAAAAAAGAAGCTTTTGGAACCTTAGGAATAATTT  
ATGCTATAATAGCTATCGGATTATTAGGATTCGTAGTTTGAGCTCACCATATATTT  
ACAGTAGGAATAGATGTAGATACCCGAGCTTACTTCACTTCAGCAACTATAATTA  
TTGCGGTTCCAACCTGGGATTAAGTCTTTAGATGACTAGCCACCTTTTCATGGAAC  
TCAAATTTTAAATAGACCAGTAACCCTGTGAGCTTTAGGTTTTGTATTTTTATTTA  
CAGTAGGAGGATTAACAGGGGTAAATTTTAGCTAATTCTTCAATTGATATTATTCTC  
CACGATACTTACTATGTAGTAGCTCATTTTCACTATGTTCTTTCTATAGGAGCTGT  
ATTTGCAATTATAGCCGGAATTGTCCAATGATTCCCATTATTTACCGGACTAACC  
TTAAATAATTTTTTTTTTAAAAACCCAATTTATTACTATATTTTTAGGTGTAAATTTAA  
CATTTTTTCTCAACACTTTTTAGGGCTAAGAGGAATGCCTCGGCGATATTCGGA  
TTATCCAGATGCTTTCACTATCTGAAATGCCATTTTCATCTATTGGTTCCATTATTT  
CTCTCACAAGAATTATCTTTTTTTTTATTTATCTTATGAGAAAGGCTTTCTTCCCAA  
CGTAAATCTTTGAGAACTTTAAATGTAACAACCTTCAATTGAATGGTTTCAAGCCCT  
ACCCCTAGTG

EQ1\_8

ATTATTAGACAAGAAAGGGGGGAAAAAAGAAGCTTTTGGAACCTTAGGAATAATTT  
ATGCTATAATAGCTATCGGATTATTAGGATTCGTAGTTTGAGCTCACCATATATTT  
ACAGTAGGAATAGATGTAGATACCCGAGCTTACTTCACTTCAGCAACTATAATTA  
TTGCGGTTCCAACCTGGGATTAAGTCTTTAGATGACTAGCCACCTTTTCATGGAAC  
TCAAATTTTAAATAGACCAGTAACCCTGTGAGCTTTAGGTTTTGTATTTTTATTTA  
CAGTAGGAGGATTAACAGGGGTAAATTTTAGCTAATTCTTCAATTGATATTATTCTC



CACGATACTTACTATGTAGTAGCTCATTTCCTACTATGTTCTTTCTATAGGAGCTGT  
ATTTGCAATTATAGCCGGAATTGTCCAATGATTCCCATTATTTACCGGACTAACC  
TTAAATAATTTTTTTTTTAAAAACCCAATTTATTACTATATTTTTAGGTGTAAATTTAA  
CATTTTTTCTCAACACTTTTTAGGGCTAAGAGGAATGCCTCGGCGATATTCGGA  
TTATCCAGATGCTTTCACTATCTGAAATGCCATTTATCTATTGGTTCCATTATTT  
CTCTCACAAGAATTATCTTTTTTTTTATTTATCTTATGAGAAAGGCTTTCTTCCCAA  
CGTAAATCTTTGAGAACTTTAAATGTAACAACCTTCAATTGAATGGTTTCAAGCCCT  
ACCCCCTAGTG

EQU\_5

ATTATTAGACAAGAAAGGGGGGAAAAAGAAGCTTTTGAACCTTAGGAATAATTT  
ATGCTATAATAGCTATCGGATTATTAGGATTCGTAGTTTGAGCTCACCATATATTT  
ACAGTAGGAATAGATGTAGATACCCGAGCTTACTTCACTTCAGCAACTATAATTA  
TTGCGGTTCCAACCTGGGATTAAGTCTTTAGATGACTAGCCACCTTTTATGGAAC  
TCAAATTTTAAATAGACCAGTAACCCTGTGAGCTTTAGGTTTTGTATTTTTATTTA  
CAGTAGGAGGATTAACAGGGGTAAATTTAGCTAATTCTTCAATTGATATTATTCTC  
CACGATACTTACTATGTAGTAGCTCATTTCCTACTATGTTCTTTCTATAGGAGCTGT  
ATTTGCAATTATAGCCGGAATTGTCCAATGATTCCCATTATTTACCGGACTAACC  
TTAAATAATTTTTTTTTTAAAAACCCAATTTATTACTATATTTTTAGGTGTAAATTTAA  
CATTTTTTCTCAACACTTTTTAGGGCTAAGAGGAATGCCTCGGCGATATTCGGA  
TTATCCAGATGCTTTCACTATCTGAAATGCCATTTATCTATTGGTTCCATTATTT  
CTCTCACAAGAATTATCTTTTTTTTTATTTATCTTATGAGAAAGGCTTTCTTCCCAA  
CGTAAATCTTTGAGAACTTTAAATGTAACAACCTTCAATTGAATGGTTTCAAGCCCT  
ACCCCCTAGTG

;

endblock;

**datasetS4**

#NEXUS

begin data;  
  dimensions ntax=56 nchar=1579;  
  format datatype=dna gap=- interleave=no;  
  matrix

afr19

CGGGCGATGTGTACATATTTTAGAGCTTTAATCATCTTAAAAAATCTAAAAAATT  
ACTCTCAAATCCAAATTCAAATTTTTTTAACAAAAATTATTTTAAAATAAATTTATT  
GTAACCCATTTCTTCTTTATTATAAACTACACCTTGATCTGATTTATTTTTTAATAA  
AAAATTTTAAATATTTATAATTCTATTAATAATTTAACTACGACGATATATAAAC  
TAATAAATAAAGTGCATCTAATCGTGGACTATCGATTATAGAACAGGTTCCCTCTG  
AAAAGACTAAAATACCGCCAAATTTTTTAATTTTCAAGAACATAACTAATACTAAT  
TAAGTAAAAAATTTACATTTTTAATAATAGGGTATCTAACAGACCTAATATTTCC  
AGCTTCTGCACCAAAAATTAATTTAATCCAACATCGAGGTCGCAATCTTTATCTT  
CGATTAGAACTCTTTGATAATATTACGCTGTTATCCCTAAGGTAATTAATCTTAC  
AATTATTACTAATAGCTCAAGTATACATAAATTAATGATTTAAATTTAAAAAAGTT  
CAATTAATTTTTCAATCACCCCAATTAATAATTAATAAATTAATAAATTTTATAC  
TaAAAAAATTAATAATTTTTAAATATGAACTCTATAGGGTCTTCTCGTCTTTTTAA  
ATTAATTTTAGCTTTTTAACTAAAAATAAATTTTTAATGTTTAAATAGAGACAGAA  
ATTTTTTATCCAACCATTCATTCCAGCTTCTAATTAAGAACTAATGATTATGCTA  
CCTTAGCACGGTCAAATACCGCGGCCATTTAATCCTCAGAGGGCAGGCTAAT  
TATTAGACAAGAAAGGGGAAAAAGAAGCTTTTGGAACCTTAGGAATAATTTAT  
GCCATGATAGCTATCGGATTATTAGGATTCGTAGTTTGAGCTCACCATATATTTA  
CAGTAGGGATAGATGTAGATACCCGAGCTTACTTCACTTCAGCAACTATAATTAT  
TGCGGTTCCAACCTGGGATTAAGTCTTTAGATGACTAGCCACCTTTCATGGAAC  
CAAATTTTAAATAGACCAGTAACCCTGTGAGCTTTAGGTTTTGTATTTTTATTTAC  
AGTAGGAGGATTAACAGGGGTAATTTAGCTAATTCTTCAATTGATATTATTCTTC  
ACGATACTTACTATGTAGTAGCTCATTTTCACTATGTTCTTTCTATAGGAGCTGTA  
TTTGCAATTATAGCCGGAATTGTCCAATGATTTCCATTATTTACCGGACTAACCT  
TAAATAATTTTTTTTTAAAAACCAATTTATTACTATATTTTTAGGTGTAAATTTAAC  
ATTTTTTCCCAACACTTTTTAGGGCTAAGAGGAATGCCTCGGCGATATTCGGAT  
TATCCAGATGCTTTCCTATCTGAAATGCCATTTTCACTATTGGTTCCATTATTTT  
TCTCACAAGAATTATCTTTTTTTTTATTTATCTTATGAGAAAGGCTTTCTTCCCAAC  
GTAATCTTTGAGAACTTTAAATGTAACAACCTTCAATTGAATGGTTACAAGCCCTA  
CCCCCTAGTG

afr9

CGGGCGATGTGTACATATTTTAGAGCTTTAATCATCTTAAAAAATCTAAAAAATT  
ACTCTCAAATCCAAATTCAAATTTTTTTAACAAAAATTATTTTAAAATAAATTTATT  
GTAACCCATTTCTTCTTTATTATAAACTACACCTTGATCTGATTTATTTTTTAATAA  
AAAATTTTAAATATTTATAATTCTATTAATAATTTAACTACGACGATATATAAAC  
TAATAAATAAAGTGCATCTAATCGTGGACTATCGATTATAGAACAGGTTCCCTCTG  
AAAAGACTAAAATACCGCCAAATTTTTTAATTTTCAAGAACATAACTAATACTAAT  
TAAGTAAAAAATTTACATTTTTAATAATAGGGTATCTAACAGACCTAATATTTCC  
AGCTTCTGCACCAAAAATTAATTTAATCCAACATCGAGGTCGCAATCTTTATCTT  
CGATTAGAACTCTTTGATAATATTACGCTGTTATCCCTAAGGTAATTAATCTTAC  
AATTATTACTAATAGCTCAAGTATACATAAATTAATGATTTAAATTTAAAAAAGTT  
CGATTAATTTTTCAATCACCCCAATTAATAATTAATAAATTAATAAATTTTATAC

TaAAAAAAAAATTA AAAATTTTTAAATATGAAACTCTATAGGGTCTTCTCGTCTTTTTAA  
ATTAATCTTAGCTTTTTAACTAAAAATAAATTTTTAATGTTTAAATAGAGACAGAA  
ATTTTTTATCCAACCATTCATTCCAGCTTCTAATTAAGAACTAATGATTATGCTA  
CCTTAGCACGGTCAAATACCGCGGCCATTTAAATCCTCAGAGGGCAGGCTAAT  
TATTAGACAAGAAAGGGGGAAAAAGAAGCTTTTGGAACCTTAGGAATAATTTAT  
GCCATGATAGCTATCGGATTATTAGGATTCGTAGTTTGAGCTCACCATATATTTA  
CAGTAGGGATAGATGTAGATACCCGAGCTTACTTCACTTCAGCAACTATAATTAT  
CGCGGTTCCAACCTGGGATTAAGTCTTTAGGTGACTAGCCACCTTTCATGGAAC  
TCAAATTTAAATAGACCAGTAACCCTGTGAGCTTTAGGTTTTGTATTTTTATTTA  
CAGTAGGAGGATTAACAGGGGTAATTTTAGCTAATTCTTCAATTGATATTATTCTT  
CACGATACTTACTATGTAGTAGCTCATTTTCACTATGTTCTTTCTATAGGAGCTGT  
ATTTGCAATTATAGCCGGAATTGTCCAATGATTCCCATTATTTACTGGACTAACCT  
TAAATAATTTTTTTTTAAAAACCCAATTTATTACTATATTTTTAGGTGTAAATTTAAC  
ATTTTTTCTCAACACTTTTTAGGGCTAAGAGGAATGCCTCGGCGATATTCGGAT  
TATCCAGATGCTTTCCTATCTGAAATGCCATTTTCATCTATTGGTTCCATTATTTT  
TCTCACAAGAATTATCTTTTTTTTTATTTATCTTATGAGAAAGGCTTTCTTCCCAAC  
GTAATCTTTGAGA ACTTTAAATGTAACA ACTTCAATTGAATGGTTACAAGCCCTA  
CCCCCTAGTG

AOPE\_12

CGGGCGATGTGTACATATTTTAGAGCTTTAATCATCTTAAAAAATCTAAAAAATT  
ACTCTCAAATCAAATTCAAATTTTTTAAACAAAATTATTTTCAAATAAATTTATT  
GTAACCCATTTCTTCTTTATTATAAACTACACCTTGATCTGATTTATTTTTAATAA  
AAAATTTAAATATTTATAATTCTATTAATAATTTAACTACGACGATATATAAAC  
TAATAAATAAAGTGCATCTAATCGTGGACTATCGATTATAGAACAGGTTCTCTG  
AAAAGACTAAAATACCGCAAATTTTTAATTTCAAGAACATAACTAATACTAAT  
TAAGTAAAAAATTTACATTTTAAATAAGGGTATCTAACAGACCTAATATCCCC  
AGCTTCTACACCAAAAATTAATTTAATCCAACATCGAGGTCGCAATCTTTATCTT  
CGATTAGA ACTCTTTGATAATATTACGCTGTTATCCCTAAGGTAATTAATCTTAC  
AATTACTAATAGCTCAAGTATACATAAATTAATGATTTAAATTTAAAAAAGTT  
CAATTAATTTTCAATCACCCCAATTAATAATTAATAAATTAATAAATTTTATAC  
TaAAAAAAAAATTA AAAATTTTTAAATATGAAACTCTATAGGGTCTTCTCGTCTTTTTAA  
ATTAATTTAGCTTTTTAACTAAAAATAAATTTTTAATGTTTAAATAGAGACAGAA  
ATTTTTTATCCAACCATTCATTCCAGCTTCTAATTAAGAACTAATGATTATGCTA  
CCTTAGCACGGTCAAATACCGCGGCCATTTAAATCCTCAGAGGGCAGGCTAAT  
TATTAGACAAGAAAGGGGGAAAAAGAAGCTTTTGGAACCTTAGGAATAATTTAT  
GCTATAATAGCTATCGGATTATTAGGATTCGTAGTTTGAGCTCACCATATATTTAC  
AGTAGGAATAGATGTAGATACCCGAGCTTACTTCACTTCAGCAACTATAATTATT  
GCGGTTCCAACCTGGGATTAAGTCTTTAGATGACTAGCCACCTTTCATGGAAC  
CAAATTTTAAATAGACCAGTAACCCTGTGAGCTTTAGGTTTTGTATTTTTATTTAC  
AGTAGGAGGATTAACAGGGGTAATTTAGCTAATTCTTCAATTGATATTATTCTCC  
ACGATACTTACTATGTAGTAGCTCATTTTCACTATGTTCTTTCTATAGGAGCTGTA  
TTTGCAATTATAGCCGGAATTGTCCAATGATTCCCATTATTTACCGGACTAACCT  
TAAATAATTTTTTTTTAAAAACCCAATTTATTACTATATTTTTAGGTGTAAATTTAAC  
ATTTTTTCTCAACACTTTTTAGGGCTAAGAGGAATGCCTCGGCGATATTCGGAT  
TATCCAGATGCTTTCCTATCTGAAATGCCATTTTCATCTATTGGTTCCATTATTTT  
TCTCACAAGAATTATCTTTTTTTTTATTTATCTTATGAGAAAGGCTTTCTTCCCAAC  
GTAATCTTTGAGA ACTTTAAATGTAACA ACTTCAATTGAATGGTTTACAAGCCCTA  
CCCCCTAGTG

AOPE\_13

CGGGCGATGTGTACATATTTTAGAGCTTTAATCATCTTAAAAAATCTAAAAAATT

ACTCTCAAATCCAAATTCAAATTTTTTTAAACAAAAATTATTTTCAAATAAATTTATT  
GTAACCCATTTCTTCTTTATTATAAACTACACCTTGATCTGATTTATTTTTTAATAA  
AAAATTTTAAATATTTATAATTCTATTAATAATTTAACTACGACGATATATAAAC  
TAATAAATAAAGTGCATCTAATCGTGGACTATCGATTATAGAACAGGTTCTCTG  
AAAAGACTAAAATACCGCCAAATTTTTTAATTTTCAAGAACATAACTAATACTAAT  
TAAGTAAAAAAATTTACATTTTTTAATAATAGGGTATCTAACAGACCTAATATCCCC  
AGCTTCTACACCAAAAATTAATTTAATCCAACATCGAGGTCGCAATCTTTATCTT  
CGATTAGAACTCTTTGATAATATTACGCTGTTATCCCTAAGGTAATTAATCTTAC  
AATTATTACTAATAGCTCAAGTATACATAAATTAATGATTTAAATTTAAAAAAAGTT  
CAATTAATTTTTCAATCACCCCAATTAATAAATTAATAAATTAATAAATTTTTATAC  
TaAAAAAAATTAATAATTTTTAAATATGAACTCTATAGGGTCTTCTCGTCTTTTTAA  
ATTAATTTTAGCTTTTTAACTAAAAATAAATTTTTAATGTTTAAATAGAGACAGAA  
ATTTTTTATCCAACCATTCATTCCAGCTTCTAATTAAGAACTAATGATTATGCTA  
CCTTAGCACGGTCAAATACCGCGGCCATTTAAATCCTCAGAGGGCAGGCTAAT  
TATTAGACAAGAAAGGGGGAAAAAAGAAGCTTTTGGAACCTTAGGAATAATTTAT  
GCTATAATAGCTATCGGATTATTAGGATTCGTAGTTTGAGCTCACCATATATTTAC  
AGTAGGAATAGATGTAGATACCCGAGCTTACTTCACTTCAGCAACTATAATTATT  
GCGGTTCCAACCTGGGATTAAGTCTTTAGATGACTAGCCACCTTTCATGGAACT  
CAAATTTTAAATAGACCAGTAACCCTGTGAGCTTTAGGTTTTGTATTTTTATTTAC  
AGTAGGAGGATTAACAGGGGTAATTTAGCTAATTCTTCAATTGATATTATTCTCC  
ACGATACTTACTATGTAGTAGCTCATTTTCACTATGTTCTTTCTATAGGAGCTGTA  
TTTGCAATTATAGCCGGAATTGTCCAATGATTCCCATTTTACCGGACTAACCT  
TAAATAATTTTTTTTTAAAAACCCAATTTATTACTATATTTTTAGGTGTAAATTTAAC  
ATTTTTTCTCAACACTTTTTAGGGCTAAGAGGAATGCCTCGGCGATATTCGGAT  
TATCCAGATGCTTTCCTATCTGAAATGCCATTTTCATCTATTGGTTCCATTATTTT  
TCTCACAAGAATTATCTTTTTTTTTATTTATCTTATGAGAAAGGCTTTCTTCCCAAC  
GTAATCTTTGAGAACTTTAAATGTAACAACCTTCAATTGAATGGTTTCAAGCCCTA  
CCCCCTAGTG

AOPE\_14

CGGGCGATGTGTACATATTTTAGAGCTTTAATCATCTTAAAAAATCTAAAAAATT  
ACTCTCAAATCCAAATTCAAATTTTTTTAAACAAAAATTATTTTCAAATAAATTTATT  
GTAACCCATTTCTTCTTTATTATAAACTACACCTTGATCTGATTTATTTTTTAATAA  
AAAATTTTAAATATTTATAATTCTATTAATAATTTAACTACGACGATATATAAAC  
TAATAAATAAAGTGCATCTAATCGTGGACTATCGATTATAGAACAGGTTCTCTG  
AAAAGACTAAAATACCGCCAAATTTTTTAATTTTCAAGAACATAACTAATACTAAT  
TAAGTAAAAAAATTTACATTTTTTAATAATAGGGTATCTAACAGACCTAATATCCCC  
AGCTTCTACACCAAAAATTAATTTAATCCAACATCGAGGTCGCAATCTTTATCTT  
CGATTAGAACTCTTTGATAATATTACGCTGTTATCCCTAAGGTAATTAATCTTAC  
AATTATTACTAATAGCTCAAGTATACATAAATTAATGATTTAAATTTAAAAAAAGTT  
CAATTAATTTTTCAATCACCCCAATTAATAAATTAATAAATTAATAAATTTTTATAC  
TaAAAAAAATTAATAATTTTTAAATATGAACTCTATAGGGTCTTCTCGTCTTTTTAA  
ATTAATTTTAGCTTTTTAACTAAAAATAAATTTTTAATGTTTAAATAGAGACAGAA  
ATTTTTTATCCAACCATTCATTCCAGCTTCTAATTAAGAACTAATGATTATGCTA  
CCTTAGCACGGTCAAATACCGCGGCCATTTAAATCCTCAGAGGGCAGGCTAAT  
TATTAGACAAGAAAGGGGGAAAAAAGAAGCTTTTGGAACCTTAGGAATAATTTAT  
GCTATAATAGCTATCGGATTATTAGGATTCGTAGTTTGAGCTCACCATATATTTAC  
AGTAGGAATAGATGTAGATACCCGAGCTTACTTCACTTCAGCAACTATAATTATT  
GCGGTTCCAACCTGGGATTAAGTCTTTAGATGACTAGCCACCTTTCATGGAACT  
CAAATTTTAAATAGACCAGTAACCCTGTGAGCTTTAGGTTTTGTATTTTTATTTAC  
AGTAGGAGGATTAACAGGGGTAATTTAGCTAATTCTTCAATTGATATTATTCTCC

ACGATACTTACTATGTAGTAGCTCATTTTTCACTATGTTCTTTCTATAGGAGCTGTA  
TTTGCAATTATAGCCGGAATTGTCCAATGATTCCCATTATTTACCGGACTAACCT  
TAAATAATTTTTTTTTAAAAACCCAATTTATTACTATATTTTTAGGTGTAAATTTAAC  
ATTTTTTCTCAACACTTTTTAGGGCTAAGAGGAATGCCTCGGCGATATTCGGAT  
TATCCAGATGCTTTCACTATCTGAAATGCCATTTTCATCTATTGGTTCCATTATTTT  
TCTCACAAGAATTATCTTTTTTTTTATTATCTTATGAGAAAGGCTTTCTTCCCAAC  
GTAATCTTTGAGAACTTTAAATGTAACAACCTTCAATTGAATGGTTTCAAGCCCTA  
CCCCCTAGTG

AOPE\_4

CGGGCGATGTGTACATATTTTAGAGCTTTAATCATCTTAAAAAATCTAAAAAATT  
ACTCTCAAATCCAAATCAAATTTTTTAAACAAAAATTATTTTCAAATAAATTTATT  
GTAACCCATTTCTTCTTTATTATAAACTACACCTTGATCTGATTTATTTTTAATAA  
AAAATTTTAAATATTTATAATTCTATTAATAATTTAAACTACGACGATATATAAAC  
TAATAAATAAAGTGCATCTAATCGTGGACTATCGATTATAGAACAGGTTCTCTG  
AAAAGACTAAAATACCGCCAAATTTTTTAATTTTCAAGAACATAACTAATACTAAT  
TAAGTAAAAAATTTACATTTTTAATAATAGGGTATCTAACAGACCTAATATCCCC  
AGCTTCTACACCAAAAATTAATTTAATCCAACATCGAGGTCGCAATCTTTATCTT  
CGATTAGAACTCTTTGATAATATTACGCTGTTATCCCTAAGGTAATTAATCTTAC  
AATTATTACTAATAGCTCAAGTATACATAAATTAATGATTTAAATTTAAAAAAGTT  
CAATTAATTTTTCAATCACCCCAATTAATAAATTAATAAATTAATAAATTTTATAC  
TaAAAAAATTAATAATTTTTAAATATGAACTCTATAGGGTCTTCTCGTCTTTTTAA  
ATTAATTTTAGCTTTTTAACTAAAAATAAATTTTTAATGTTTAAATAGAGACAGAA  
ATTTTTTATCCAACCATTCAATCCAGCTTCTAATTAAGAACTAATGATTATGCTA  
CCTTAGCACGGTCAAATACCGCGGCCATTTAATCCTCAGAGGGCAGGCTAAT  
TATTAGACAAGAAAGGGGAAAAAGAAGCTTTTGGAACCTTAGGAATAATTTAT  
GCTATAATAGCTATCGGATTATTAGGATTCGTAGTTTGAGCTCACCATATATTTAC  
AGTAGGAATAGATGTAGATACCCGAGCTTACTTCACTTCAGCAACTATAATTATT  
GCGGTTCCAAGTGGGATTAAGTCTTTAGATGACTAGCCACCTTTTCATGGAAGT  
CAAATTTTAAATAGACCAGTAACCCTGTGAGCTTTAGGTTTTGTATTTTTATTTAC  
AGTAGGAGGATTAACAGGGGTAATTTAGCTAATTCTTCAATTGATATTATTCTCC  
ACGATACTTACTATGTAGTAGCTCATTTTTCACTATGTTCTTTCTATAGGAGCTGTA  
TTTGCAATTATAGCCGGAATTGTCCAATGATTCCCATTATTTACCGGACTAACCT  
TAAATAATTTTTTTTTAAAAACCCAATTTATTACTATATTTTTAGGTGTAAATTTAAC  
ATTTTTTCTCAACACTTTTTAGGGCTAAGAGGAATGCCTCGGCGATATTCGGAT  
TATCCAGATGCTTTCACTATCTGAAATGCCATTTTCATCTATTGGTTCCATTATTTT  
TCTCACAAGAATTATCTTTTTTTTTATTATCTTATGAGAAAGGCTTTCTTCCCAAC  
GTAATCTTTGAGAACTTTAAATGTAACAACCTTCAATTGAATGGTTTCAAGCCCTA  
CCCCCTAGTG

bj1

CGGGCGATGTGTACATATTTTAGAGCTTTAATCATCTTAAAAAATCTAAAAAATT  
ACTCTCAAATCCAAATCAAATTTTTTAAACAAAAATTATTTTAAATAAATTTATT  
GTAACCCATTTCTTCTTTATTATAAACTACACCTTGATCTGATTTATTTTTAATAA  
AAAATTTTAAATATTTATAATTCTATTAATAATTTAAACTACGACGATATATAAAC  
TAATAAATAAAGTGCATCTAATCGTGGACTATCGATTATAGAACAGGTTCTCTG  
AAAAGACTAAAATACCGCCAAATTTTTTAATTTTCAAGAACATAACTAATACTAAT  
TAAGTAAAAAATTTACATTTTTAATAATAGGGTATCTAACAGACCTAATATTTCC  
AGCTTCTGCACCAAAAATTAATTTAATCCAACATCGAGGTCGCAATCTTTATCTT  
CGATTAGAACTCTTTGATAATATTACGCTGTTATCCCTAAGGTAATTAATCTTAC  
AATTATTACTAATAGCTCAAGTATACATAAATTAATGATTTAAATTTAAAAAAGTT  
CAATTAATTTTTCAATCACCCCAATTAATAAATTAATAAATTAATAAATTTTATAC

TaAAAAAAAAATTA AAAATTTTTAAATATGAAACTCTATAGGGTCTTCTCGTCTTTTTAA  
ATTAATTTTAGCTTTTTAACTAAAAATAAATTTTTAATGTTTAAATAGAGACAGAA  
ATTTTTTATCCAACCATTCATTCCAGCTTCTAATTAAGAACTAATGATTATGCTA  
CCTTAGCACGGTCAAATACCGCGGCCATTTAAATCCTCAGAGGGCAGGCTAAT  
TATTAGACAAGAAAGGGGGAAAAAGAAGCTTTTGGAACCTTAGGAATAATTTAT  
GCCATGATAGCTATCGGATTATTAGGATTCGTAGTTTGAGCTCACCATATATTTA  
CAGTAGGGATAGATGTAGATACCCGAGCTTACTTCACTTCAGCAACTATAATTAT  
TGCGGTTCCAACCTGGGATTAAGTCTTTAGATGACTAGCCACCTTTCATGGAAC  
CAAATTTTAAATAGACCAGTAACCCTGTGAGCTTTAGGTTTTGTATTTTTATTAC  
AGTAGGAGGATTAACAGGGGTAATTTAGCTAATTCTTCAATTGATATTATTCTTC  
ACGATACTTACTATGTAGTAGCTCATTTCCTATGTTCTTTCTATAGGAGCTGTA  
TTTGCAATTATAGCCGGAATTGTCCAATGATTCCCATTATTTACCGGACTAACCT  
TAAATAATTTTTTTTTAAAAACCCAATTTATTACTATATTTTTAGGTGTAAATTTAAC  
ATTTTTTCCCAACACTTTTTAGGGCTAAGAGGAATGCCTCGGCGATATTCGGAT  
TATCCAGATGCTTTCCTATCTGAAATGCCATTTTCATCTATTGGTTCCATTATTTT  
TCTCACAAGAATTATCTTTTTTTTTATTATCTTATGAGAAAGGCTTTCTTCCCAAC  
GTAATCTTTGAGA ACTTTAAATGTAACA ACTTCAATTGAATGGTTACAAGCCCTA  
CCCCCTAGTG

CAM\_YAH

CGGGCGATGTGTACATATTTTAGAGCTTTAATCATCTTAAAAAATCTAAAAAATT  
ACTCTCAAATCAAATCAAATTTTTTAAACAAAAATTATTTTAAAATAAATTTATT  
GTAACCCATTTCTTCTTTATTATAAACTACACCTTGATCTGATTTATTTTTAATAA  
AAAATTTTAAATATTTATAATTCTATTAATAATTTAACTACGACGATATATAAAC  
TAATAAATAAAGTGCATCTAATCGTGGACTATCGATTATAGAACAGGTTCTCTG  
AAAAGACTAAAATACCGCAAATTTTTTAAATTTCAAGAACATAACTAATACTAAT  
TAAGTAAAAAATTTACATTTTTAATAATAGGGTATCTAACAGACCTAATATTTCC  
AGCTTCTGCACCAAAAATTAATTTAATCCAACATCGAGGTCGCAATCTTTATCTT  
CGATTAGA ACTCTTTGATAATATTACGCTGTTATCCCTAAGGTAATTAATCTTAC  
AATTACTAATAGCTCAAGTATACATAAATTAATGATTTAAATTTAAAAAAGTT  
CGATTAATTTTTCAATCACCCCAATTAATAATTAAAAAAATTAATAATTTTTATAC

TaAAAAAAAAATTA AAAATTTTTAAATATGAAACTCTATAGGGTCTTCTCGTCTTTTTAA  
ATTAATCTTAGCTTTTTAACTAAAAATAAATTTTTAATGTTTAAATAGAGACAGAA  
ATTTTTTATCCAACCATTCATTCCAGCTTCTAATTAAGAACTAATGATTATGCTA  
CCTTAGCACGGTCAAATACCGCGGCCATTTAAATCCTCAGAGGGCAGGCTAAT  
TATTAGACAAGAAAGGGGGAAAAAGAAGCTTTTGGAACCTTAGGAATAATTTAT  
GCCATGATAGCTATCGGATTATTAGGATTCGTAGTTTGAGCTCTCCATATATTTA  
CAGTAGGGATAGATGTAGATACCCGAGCTTACTTCACTTCAGCAACTATGATTAT  
CGCGGTTCCAACCTGGGATTAAGTCTTTAGGTGACTAGCCACCTTTCATGGAAC  
TCAAATTTTAAATAGACCAGTAACCCTGTGAGCTTTAGGTTTTGTATTTTTATTTA  
CAGTAGGAGGATTAACAGGGGTAATTTAGCTAATTCTTCAATTGATATTATTCTT  
CACGATACTTACTATGTAGTAGCTCATTTCCTATGTTCTTTCTATAGGAGCTGT  
ATTTGCAATTATAGCCGGAATTGTCCAATGATTCCCATTATTTACTGGACTAACCT  
TAAATAATTTTTTTTTAAAAACCCAATTTATTACTATATTTTTAGGTGTAAATTTAAC  
ATTTTTTCTCAACACTTTTTAGGGCTAAGAGGAATGCCTCGGCGATATTCGGAT  
TATCCAGATGCTTTCCTATCTGAAATGCCATTTTCATCTATTGGTTCCATTATTTT  
TCTCACAAGAATTATCTTTTTTTTTATTATCTTATGAGAAAGGCTTTCTTCCCAAC  
GTAATCTTTGAGA ACTTTAAATGTAACA ACTTCAATTGAATGGTTACAAGCCCTA  
CCCCCTAGTG

CL1\_1

CGGGCGATGTGTACATATTTTAGAGCTTTAATCATCTTAAAAAATCTAAAAAATT

ACTCTCAAATCCAAATTCAAATTTTTTTAAACAAAAATTATTTTCAAATAAATTTATT  
GTAACCCATTTCTTCTTTATTATAAACTACACCTTGATCTGATTTATTTTTTAATAA  
AAAATTTTAAATATTTATAATTCTATTAATAATTTAAACTACGACGATATATAAAC  
TAATAAATAAAGTGCATCTAATCGTGGACTATCGATTATAGAACAGGTTCTCTG  
AAAAGACTAAAATACCGCCAAATTTTTTAATTTTCAAGAACATAACTAATACTAAT  
TAAGTAAAAAAATTTACATTTTTTAATAATAGGGTATCTAACAGACCTAATATCCCC  
AGCTTCTACACCAAAAATTAATTTAATCCAACATCGAGGTCGCAATCTTTATCTT  
CGATTAGAACTCTTTGATAATATTACGCTGTTATCCCTAAGGTAATTAATCTTAC  
AATTACTAATAGCTCAAGTATACATAAATTAATGATTTAAATTTAAAAAAAGTT  
CAATTAATTTTTCAATCACCCCAATTAATAAATTAAAAAAATTAATAATTTTTATAC  
TAAAAAAAATTAATAATTTTTAAATATGAACTCTATAGGGTCTTCTCGTCTTTTAA  
ATTAATTTTAGCTTTTTAACTAAAAATAAATTTTTAATGTTTAAATAGAGACAGAA  
ATTTTTTATCCAACCATTCATTCCAGCTTCTAATTAAGAACTAATGATTATGCTA  
CCTTAGCACGGTCAAATACCGCGGCCATTTAAATCCTCAGAGGGCAGGCTAAT  
TATTAGACAAGAAAGGGGGAAAAAGAAGCTTTTGGAACCTTAGGAATAATTTAT  
GCTATAATAGCTATCGGATTATTAGGATTCGTAGTTTGAGCTCACCATATATTTAC  
AGTAGGAATAGATGTAGATACCCGAGCTTACTTCACTTCAGCAACTATAATTATT  
GCGGTTCCAACCTGGGATTAAGTCTTTAGATGACTAGCCACCTTTCATGGAACT  
CAAATTTTAAATAGACCAGTAACCCTGTGAGCTTTAGGTTTTGTATTTTTATTTAC  
AGTAGGAGGATTAACAGGGGTAATTTAGCTAATTCTTCAATTGATATTATTCTCC  
ACGATACTTACTATGTAGTAGCTCATTTTCACTATGTTCTTTCTATAGGAGCTGTA  
TTTGCAATTATAGCCGGAATTGTCCAATGATTCCCATTTTACCGGACTAACCT  
TAAATAATTTTTTTTTAAAAACCCAATTTATTACTATTTTTTAGGTGTAAATTTAAC  
ATTTTTTCTCAACACTTTTTAGGGCTAAGAGGAATGCCTCGGCGATATTCGGAT  
TATCCAGATGCTTTCCTATCTGAAATGCCATTTTCATCTATTGGTTCCATTATTTT  
TCTCACAAGAATTATCTTTTTTTTATTTATCTTATGAGAAAGGCTTTCTTCCCAAC  
GTAATCTTTGAGAACTTTAATGTAACAACCTTCAATTGAATGGTTTCAAGCCCTA  
CCCCCTAGTG

CL1\_2

CGGGCGATGTGTACATATTTTAGAGCTTTAATCATCTTAAAAAATCTAAAAAATT  
ACTCTCAAATCCAAATTCAAATTTTTTTAAACAAAAATTATTTTCAAATAAATTTATT  
GTAACCCATTTCTTCTTTATTATAAACTACACCTTGATCTGATTTATTTTTTAATAA  
AAAATTTTAAATATTTATAATTCTATTAATAATTTAAACTACGACGATATATAAAC  
TAATAAATAAAGTGCATCTAATCGTGGACTATCGATTATAGAACAGGTTCTCTG  
AAAAGACTAAAATACCGCCAAATTTTTTAATTTTCAAGAACATAACTAATACTAAT  
TAAGTAAAAAAATTTACATTTTTTAATAATAGGGTATCTAACAGACCTAATATCCCC  
AGCTTCTACACCAAAAATTAATTTAATCCAACATCGAGGTCGCAATCTTTATCTT  
CGATTAGAACTCTTTGATAATATTACGCTGTTATCCCTAAGGTAATTAATCTTAC  
AATTACTAATAGCTCAAGTATACATAAATTAATGATTTAAATTTAAAAAAAGTT  
CAATTAATTTTTCAATCACCCCAATTAATAAATTAAAAAAATTAATAATTTTTATAC  
TAAAAAAAATTAATAATTTTTAAATATGAACTCTATAGGGTCTTCTCGTCTTTTAA  
ATTAATTTTAGCTTTTTAACTAAAAATAAATTTTTAATGTTTAAATAGAGACAGAA  
ATTTTTTATCCAACCATTCATTCCAGCTTCTAATTAAGAACTAATGATTATGCTA  
CCTTAGCACGGTCAAATACCGCGGCCATTTAAATCCTCAGAGGGCAGGCTAAT  
TATTAGACAAGAAAGGGGGAAAAAGAAGCTTTTGGAACCTTAGGAATAATTTAT  
GCTATAATAGCTATCGGATTATTAGGATTCGTAGTTTGAGCTCACCATATATTTAC  
AGTAGGAATAGATGTAGATACCCGAGCTTACTTCACTTCAGCAACTATAATTATT  
GCGGTTCCAACCTGGGATTAAGTCTTTAGATGACTAGCCACCTTTCATGGAACT  
CAAATTTTAAATAGACCAGTAACCCTGTGAGCTTTAGGTTTTGTATTTTTATTTAC  
AGTAGGAGGATTAACAGGGGTAATTTAGCTAATTCTTCAATTGATATTATTCTCC

ACGATACTTACTATGTAGTAGCTCATTTTTCACTATGTTCTTTCTATAGGAGCTGTA  
TTTGCAATTATAGCCGGAATTGTCCAATGATCCCATTTTACCGGACTAACCT  
TAAATAATTTTTTTTTAAAAACCCAATTTATTACCATATTTTTAGGTGTAAATTTAA  
CATTTTTTCTCAACACTTTTTAGGGCTAAGAGGAATGCCTCGGCGATATTCGGA  
TTATCCAGATGCTTTCACTATCTGAAATGCCATTTTCATCTATTGGTTCCATTATTT  
CTCTCACAAGAATTATCTTTTTTTTTATTTATCTTATGAGAAAGGCTTTCTTCCCAA  
CGTAAATCTTTGAGAACTTTAAATGTAACAACCTTCAATTGAATGGTTTCAAGCCCT  
ACCCCTAGTG

CL1\_3

CGGGCGATGTGTACATATTTTAGAGCTTTAATCATCTTAAAAAATCTAAAAAATT  
ACTCTCAAATCCAAATCAAATTTTTTAAACAAAAATTATTTTCAAATAAATTTATT  
GTAACCCATTTCTTCTTTATTATAAACTACACCTTGATCTGATTTATTTTTAATAA  
AAAATTTTAAATATTTATAATTCTATTAATAATTTAAACTACGACGATATATAAAC  
TAATAAATAAAGTGCATCTAATCGTGGACTATCGATTATAGAACAGGTTCTCTG  
AAAAGACTAAAATACCGCCAAATTTTTTAATTTTCAAGAACATAACTAATACTAAT  
TAAGTAAAAAATTTACATTTTTAATAATAGGGTATCTAACAGACCTAATATCCCC  
AGCTTCTACACCAAAAATTAATTTAATCCAACATCGAGGTCGCAATCTTTATCTT  
CGATTAGAACTCTTTGATAATATTACGCTGTTATCCCTAAGGTAATTAATCTTAC  
AATTATTACTAATAGCTCAAGTATACATAAATTAATGATTTAAATTTAAAAAAGTT  
CAATTAATTTTTCAATCACCCCAATTAATAATTAAAAAAATTAATAATTTTTATAC  
TAAAAAAAATTAATAATTTTTAAATATGAAACTCTATAGGGTCTTCTCGTCTTTTTAA  
ATTAATTTTAGCTTTTTAACTAAAAATAAATTTTTAATGTTTAAATAGAGACAGAA  
ATTTTTTATCCAACCATTCAATCCAGCTTCTAATTAAGAACTAATGATTATGCTA  
CCTTAGCACGGTCAAATACCGCGGCCATTTAATCCTCAGAGGGCAGGCTAAT  
TATTAGACAAGAAAGGGGGAAAAAGAAGCTTTTGGAACCTTAGGAATAATTTAT  
GCTATAATAGCTATCGGATTATTAGGATTCGTAGTTTGAGCTCACCATATATTTAC  
AGTAGGAATAGATGTAGATACCCGAGCTTACTTCACTTCAGCAACTATAATTATT  
GCGGTTCCAAGTGGGATTAAGTCTTTAGATGACTAGCCACCTTTTCATGGAAGT  
CAAATTTTAAATAGACCAGTAACCCTGTGAGCTTTAGGTTTTGTATTTTTATTTAC  
AGTAGGAGGATTAACAGGGGTAATTTAGCTAATTCTTCAATTGATATTATTCTCC  
ACGATACTTACTATGTAGTAGCTCATTTTTCACTATGTTCTTTCTATAGGAGCTGTA  
TTTGCAATTATAGCCGGAATTGTCCAATGATCCCATTTTACCGGACTAACCT  
TAAATAATTTTTTTTTAAAAACCCAATTTATTACTATATTTTTAGGTGTAAATTTAAC  
ATTTTTTCTCAACACTTTTTAGGGCTAAGAGGAATGCCTCGGCGATATTCGGAT  
TATCCAGATGCTTTCACTATCTGAAATGCCATTTTCATCTATTGGTTCCATTATTTCT  
TCTCACAAGAATTATCTTTTTTTTTATTTATCTTATGAGAAAGGCTTTCTTCCCAA  
GTAATCTTTGAGAACTTTAAATGTAACAACCTTCAATTGAATGGTTTCAAGCCCTA  
CCCCCTAGTG

CL1\_4

CGGGCGATGTGTACATATTTTAGAGCTTTAATCATCTTAAAAAATCTAAAAAATT  
ACTCTCAAATCCAAATCAAATTTTTTAAACAAAAATTATTTTCAAATAAATTTATT  
GTAACCCATTTCTTCTTTATTATAAACTACACCTTGATCTGATTTATTTTTAATAA  
AAAATTTTAAATATTTATAATTCTATTAATAATTTAAACTACGACGATATATAAAC  
TAATAAATAAAGTGCATCTAATCGTGGACTATCGATTATAGAACAGGTTCTCTG  
AAAAGACTAAAATACCGCCAAATTTTTTAATTTTCAAGAACATAACTAATACTAAT  
TAAGTAAAAAATTTACATTTTTAATAATAGGGTATCTAACAGACCTAATATCCCC  
AGCTTCTACACCAAAAATTAATTTAATCCAACATCGAGGTCGCAATCTTTATCTT  
CGATTAGAACTCTTTGATAATATTACGCTGTTATCCCTAAGGTAATTAATCTTAC  
AATTATTACTAATAGCTCAAGTATACATAAATTAATGATTTAAATTTAAAAAAGTT  
CAATTAATTTTTCAATCACCCCAATTAATAATTAAAAAAATTAATAATTTTTATAC



TAAAAAAAAAATTAATAATTTTTAAATATGAAACTCTATAGGGTCTTCTCGTCTTTTAA  
ATTAATTTTAGCTTTTTAACTAAAAAATAAATTTTTAATGTTTAAATAGAGACAGAA  
ATTTTTTATCCAACCATTCATTCCAGCTTCTAATTAAGAACTAATGATTATGCTA  
CCTTAGCACGGTCAAATACCGCGGCCATTTAAATCCTCAGAGGGCAGGCTAAT  
TATTAGACAAGAAAGGGGGAAAAAGAAGCTTTTGGAACCTTAGGAATAATTTAT  
GCTATAATAGCTATCGGATTATTAGGATTCGTAGTTTGAGCTCACCATATATTTAC  
AGTAGGAATAGATGTAGATACCCGAGCTTACTTCACTTCAGCAACTATAATTATT  
GCGGTTCCAACCTGGGATTAAGTCTTTAGATGACTAGCCACCTTTCATGGAACCT  
CAAATTTTAAATAGACCAGTAACCCTGTGAGCTTTAGGTTTTGTATTTTTATTTAC  
AGTAGGAGGATTAACAGGGGTAATTTAGCTAATTCTTCAATTGATATTATTCTCC  
ACGATACTTACTATGTAGTAGCTCATTTTCACTATGTTCTTTCTATAGGAGCTGTA  
TTTGCAATTATAGCCGGAATTGTCCAATGATTCCCATTATTTACCGGACTAACCT  
TAAATAATTTTTTTTTAAAAACCCAATTTATTACTATATTTTTAGGTGTAAATTTAAC  
ATTTTTTCTCAACACTTTTTAGGGCTAAGAGGAATGCCTCGGCGATATTCGGAT  
TATCCAGATGCTTTCCTATCTGAAATGCCATTTTCATCTATTGGTTCCATTATTTT  
TCTCACAAGAATTATCTTTTTTTTTATTTATCTTATGAGAAAGGCTTTCTTCCCAAC  
GTAATCTTTGAGAACTTTAAATGTAACAACCTTCAATTGAATGGTTTCAAGCCCTA  
CCCCCTAGTG

CL1\_5

CGGGCGATGTGTACATATTTTAGAGCTTTAATCATCTTAAAAAATCTAAAAAATT  
ACTCTCAAATCAAATTCAAATTTTTTTAACAAAAATTATTTTCAAATAAATTTATT  
GTAACCCATTTCTTCTTTATTATAAACTACACCTTGATCTGATTTATTTTTTAATAA  
AAAATTTTAAATATTTATAATTCTATTAATAATTTAACTACGACGATATATAAAC  
TAATAAATAAAGTGCATCTAATCGTGGACTATCGATTATAGAACAGGTTCTCTG  
AAAAGACTAAAATACCGCCAAATTTTTTAATTTTCAAGAACATAACTAATACTAAT  
TAAGTAAAAAATTTACATTTTTAATAATAGGGTATCTAACAGACCTAATATCCCC  
AGCTTCTACACCAAAAATTAATTTAATCCAACATCGAGGTCGCAATCTTTATCTT  
CGATTAGAACTCTTTGATAATATTACGCTGTTATCCCTAAGGTAATTAATCTTAC  
AATTACTAATAGCTCAAGTATACATAAATTAATGATTTAAATTTAAAAAAGTT  
CAATTAATTTTTCAATCACCCCAATTAATAATTAAAAAAATTAATAATTTTTATAC  
TAAAAAAAATTAATAATTTTTAAATATGAAACTCTATAGGGTCTTCTCGTCTTTTAA  
ATTAATTTTAGCTTTTTAACTAAAAAATAAATTTTTAATGTTTAAATAGAGACAGAA  
ATTTTTTATCCAACCATTCATTCCAGCTTCTAATTAAGAACTAATGATTATGCTA  
CCTTAGCACGGTCAAATACCGCGGCCATTTAAATCCTCAGAGGGCAGGCTAAT  
TATTAGACAAGAAAGGGGGAAAAAGAAGCTTTTGGAACCTTAGGAATAATTTAT  
GCTATAATAGCTATCGGATTATTAGGATTCGTAGTTTGAGCTCACCATATATTTAC  
AGTAGGAATAGATGTAGATACCCGAGCTTACTTCACTTCAGCAACTATAATTATT  
GCGGTTCCAACCTGGGATTAAGTCTTTAGATGACTAGCCACCTTTCATGGAACCT  
CAAATTTTAAATAGACCAGTAACCCTGTGAGCTTTAGGTTTTGTATTTTTATTTAC  
AGTAGGAGGATTAACAGGGGTAATTTAGCTAATTCTTCAATTGATATTATTCTCC  
ACGATACTTACTATGTAGTAGCTCATTTTCACTATGTTCTTTCTATAGGAGCTGTA  
TTTGCAATTATAGCCGGAATTGTCCAATGATTCCCATTATTTACCGGACTAACCT  
TAAATAATTTTTTTTTAAAAACCCAATTTATTACCATATTTTTAGGTGTAAATTTAA  
CATTTTTTCTCAACACTTTTTAGGGCTAAGAGGAATGCCTCGGCGATATTCGGA  
TTATCCAGATGCTTTCCTATCTGAAATGCCATTTTCATCTATTGGTTCCATTATTT  
CTCTCACAAGAATTATCTTTTTTTTTATTTATCTTATGAGAAAGGCTTTCTTCCCAA  
CGTAAATCTTTGAGAACTTTAAATGTAACAACCTTCAATTGAATGGTTTCAAGCCCT  
ACCCCTAGTG

CL1\_6

CGGGCGATGTGTACATATTTTAGAGCTTTAATCATCTTAAAAAATCTAAAAAATT

ACTCTCAAATCCAAATTCAAATTTTTTTAAACAAAAATTATTTTCAAATAAATTTATT  
GTAACCCATTTCTTCTTTATTATAAACTACACCTTGATCTGATTTATTTTTTAATAA  
AAAATTTTAAATATTTATAATTCTATTAATAATTTAACTACGACGATATATAAAC  
TAATAAATAAAGTGCATCTAATCGTGGACTATCGATTATAGAACAGGTTCTCTG  
AAAAGACTAAAATACCGCCAAATTTTTTAATTTTCAAGAACATAACTAATACTAAT  
TAAGTAAAAAAATTTACATTTTTTAATAATAGGGTATCTAACAGACCTAATATCCCC  
AGCTTCTACACCAAAAATTAATTTAATCCAACATCGAGGTCGCAATCTTTATCTT  
CGATTAGAACTCTTTGATAATATTACGCTGTTATCCCTAAGGTAATTAATCTTAC  
AATTATTACTAATAGCTCAAGTATACATAAATTAATGATTTAAATTTAAAAAAAGTT  
CAATTAATTTTTCAATCACCCCAATTAATAAATTAAAAAAATTAATAATTTTTATAC  
TAAAAAAAATTAATAATTTTTAAATATGAACTCTATAGGGTCTTCTCGTCTTTTAA  
ATTAATTTTAGCTTTTTAACTAAAAATAAATTTTTAATGTTTAAATAGAGACAGAA  
ATTTTTTATCCAACCATTCATTCCAGCTTCTAATTAAGAACTAATGATTATGCTA  
CCTTAGCACGGTCAAATACCGCGGCCATTTAAATCCTCAGAGGGCAGGCTAAT  
TATTAGACAAGAAAGGGGGAAAAAGAAGCTTTTGGAACCTTAGGAATAATTTAT  
GCTATAATAGCTATCGGATTATTAGGATTCGTAGTTTGAGCTCACCATATATTTAC  
AGTAGGAATAGATGTAGATACCCGAGCTTACTTCACTTCAGCAACTATAATTATT  
GCGGTTCCAACCTGGGATTAAGTCTTTAGATGACTAGCCACCTTTCATGGAACT  
CAAATTTTAAATAGACCAGTAACCCTGTGAGCTTTAGGTTTTGTATTTTTATTTAC  
AGTAGGAGGATTAACAGGGGTAATTTAGCTAATTCTTCAATTGATATTATTCTCC  
ACGATACTTACTATGTAGTAGCTCATTTTCACTATGTTCTTTCTATAGGAGCTGTA  
TTTGCAATTATAGCCGGAATTGTCCAATGATTCCCATTTTACCGGACTAACCT  
TAAATAATTTTTTTTTAAAAACCCAATTTATTACCATATTTTTAGGTGTAAATTTAA  
CATTTTTTCTCAACACTTTTTAGGGCTAAGAGGAATGCCTCGGCGATATTCGGA  
TTATCCAGATGCTTTCACTATCTGAAATGCCATTTTCATCTATTGGTTCCATTATTT  
CTCTCACAAGAATTATCTTTTTTTTATTTATCTTATGAGAAAGGCTTTCTTCCCAA  
CGTAAATCTTTGAGAACTTTAATGTAACAACCTTCAATTGAATGGTTTCAAGCCCT  
ACCCCTAGTG

CL1\_7

CGGGCGATGTGTACATATTTTAGAGCTTTAATCATCTTAAAAAATCTAAAAAATT  
ACTCTCAAATCCAAATTCAAATTTTTTTAAACAAAAATTATTTTCAAATAAATTTATT  
GTAACCCATTTCTTCTTTATTATAAACTACACCTTGATCTGATTTATTTTTTAATAA  
AAAATTTTAAATATTTATAATTCTATTAATAATTTAACTACGACGATATATAAAC  
TAATAAATAAAGTGCATCTAATCGTGGACTATCGATTATAGAACAGGTTCTCTG  
AAAAGACTAAAATACCGCCAAATTTTTTAATTTTCAAGAACATAACTAATACTAAT  
TAAGTAAAAAAATTTACATTTTTTAATAATAGGGTATCTAACAGACCTAATATCCCC  
AGCTTCTACACCAAAAATTAATTTAATCCAACATCGAGGTCGCAATCTTTATCTT  
CGATTAGAACTCTTTGATAATATTACGCTGTTATCCCTAAGGTAATTAATCTTAC  
AATTATTACTAATAGCTCAAGTATACATAAATTAATGATTTAAATTTAAAAAAAGTT  
CAATTAATTTTTCAATCACCCCAATTAATAAATTAAAAAAATTAATAATTTTTATAC  
TAAAAAAAATTAATAATTTTTAAATATGAACTCTATAGGGTCTTCTCGTCTTTTAA  
ATTAATTTTAGCTTTTTAACTAAAAATAAATTTTTAATGTTTAAATAGAGACAGAA  
ATTTTTTATCCAACCATTCATTCCAGCTTCTAATTAAGAACTAATGATTATGCTA  
CCTTAGCACGGTCAAATACCGCGGCCATTTAAATCCTCAGAGGGCAGGCTAAT  
TATTAGACAAGAAAGGGGGAAAAAGAAGCTTTTGGAACCTTAGGAATAATTTAT  
GCTATAATAGCTATCGGATTATTAGGATTCGTAGTTTGAGCTCACCATATATTTAC  
AGTAGGAATAGATGTAGATACCCGAGCTTACTTCACTTCAGCAACTATAATTATT  
GCGGTTCCAACCTGGGATTAAGTCTTTAGATGACTAGCCACCTTTCATGGAACT  
CAAATTTTAAATAGACCAGTAACCCTGTGAGCTTTAGGTTTTGTATTTTTATTTAC  
AGTAGGAGGATTAACAGGGGTAATTTAGCTAATTCTTCAATTGATATTATTCTCC

ACGATACTTACTATGTAGTAGCTCATTTTTCACTATGTTCTTTCTATAGGAGCTGTA  
TTTGCAATTATAGCCGGAATTGTCCAATGATCCCATTTTACCGGACTAACCT  
TAAATAATTTTTTTTTAAAAACCCAATTTATTACTATATTTTTAGGTGTAAATTTAAC  
ATTTTTTCCTCAACACTTTTTAGGGCTAAGAGGAATGCCTCGGCGATATTCGGAT  
TATCCAGATGCTTTCACTATCTGAAATGCCATTTTCATCTATTGGTTCCATTATTT  
TCTCACAAGAATTATCTTTTTTTTTATTATCTTATGAGAAAGGCTTTCTTCCCAAC  
GTAATCTTTGAGAACTTTAAATGTAACAACCTTCAATTGAATGGTTTCAAGCCCTA  
CCCCCTAGTG

CL1\_8

CGGGCGATGTGTACATATTTTAGAGCTTTAATCATCTTAAAAAATCTAAAAAATT  
ACTCTCAAATCCAAATCAAATTTTTTAAACAAAAATTATTTTCAAATAAATTTATT  
GTAACCCATTTCTTCTTTATTATAAACTACACCTTGATCTGATTTATTTTTAATAA  
AAAATTTTAAATATTTATAATTCTATTAATAATTTAAACTACGACGATATATAAAC  
TAATAAATAAAGTGCATCTAATCGTGGACTATCGATTATAGAACAGGTTCCCTCTG  
AAAAGACTAAAATACCGCCAAATTTTTAATTTTCAAGAACATAACTAATACTAAT  
TAAGTAAAAAATTTACATTTTTAATAATAGGGTATCTAACAGACCTAATATCCCC  
AGCTTCTACACCAAAAATTAATTTAATCCAACATCGAGGTCGCAATCTTTATCTT  
CGATTAGAACTCTTTGATAATATTACGCTGTTATCCCTAAGGTAATTAATCTTAC  
AATTATTACTAATAGCTCAAGTATACATAAATTAATGATTTAAATTTAAAAAAGTT  
CAATTAATTTTTCAATCACCCCAATTAATAATTAAAAAAATTAATAATTTTTATAC  
TAAAAAAAATTAATAATTTTTAAATATGAAACTCTATAGGGTCTTCTCGTCTTTTTAA  
ATTAATTTTAGCTTTTTAACTAAAAATAAATTTTTAATGTTTAAATAGAGACAGAA  
ATTTTTTATCCAACCATTCAATCCAGCTTCTAATTAAGAACTAATGATTATGCTA  
CCTTAGCACGGTCAAATACCGCGGCCATTTAATCCTCAGAGGGCAGGCTAAT  
TATTAGACAAGAAAGGGGGAAAAAGAAGCTTTTGGAACCTTAGGAATAATTTAT  
GCTATAATAGCTATCGGATTATTAGGATTCGTAGTTTGAGCTCACCATATATTTAC  
AGTAGGAATAGATGTAGATACCCGAGCTTACTTCACTTCAGCAACTATAATTATT  
GCGGTTCCAAGTGGGATTAAGTCTTTAGATGACTAGCCACCTTTTCATGGAAGT  
CAAATTTTAAATAGACCAGTAACCCTGTGAGCTTTAGGTTTTGTATTTTTATTTAC  
AGTAGGAGGATTAACAGGGGTAATTTAGCTAATTCTTCAATTGATATTATTCTCC  
ACGATACTTACTATGTAGTAGCTCATTTTTCACTATGTTCTTTCTATAGGAGCTGTA  
TTTGCAATTATAGCCGGAATTGTCCAATGATCCCATTTTACCGGACTAACCT  
TAAATAATTTTTTTTTAAAAACCCAATTTATTACCATATTTTLAGGTGTAAATTTAA  
CATTTTTTCCTCAACACTTTTTAGGGCTAAGAGGAATGCCTCGGCGATATTCGGAT  
TTATCCAGATGCTTTCACTATCTGAAATGCCATTTTCATCTATTGGTTCCATTATTT  
CTCTCACAAGAATTATCTTTTTTTTTATTATCTTATGAGAAAGGCTTTCTTCCCAA  
CGTAAATCTTTGAGAACTTTAAATGTAACAACCTTCAATTGAATGGTTTCAAGCCCT  
ACCCCTAGTG

CL1\_9

CGGGCGATGTGTACATATTTTAGAGCTTTAATCATCTTAAAAAATCTAAAAAATT  
ACTCTCAAATCCAAATCAAATTTTTTAAACAAAAATTATTTTCAAATAAATTTATT  
GTAACCCATTTCTTCTTTATTATAAACTACACCTTGATCTGATTTATTTTTAATAA  
AAAATTTTAAATATTTATAATTCTATTAATAATTTAAACTACGACGATATATAAAC  
TAATAAATAAAGTGCATCTAATCGTGGACTATCGATTATAGAACAGGTTCCCTCTG  
AAAAGACTAAAATACCGCCAAATTTTTAATTTTCAAGAACATAACTAATACTAAT  
TAAGTAAAAAATTTACATTTTTAATAATAGGGTATCTAACAGACCTAATATCCCC  
AGCTTCTACACCAAAAATTAATTTAATCCAACATCGAGGTCGCAATCTTTATCTT  
CGATTAGAACTCTTTGATAATATTACGCTGTTATCCCTAAGGTAATTAATCTTAC  
AATTATTACTAATAGCTCAAGTATACATAAATTAATGATTTAAATTTAAAAAAGTT  
CAATTAATTTTTCAATCACCCCAATTAATAATTAAAAAAATTAATAATTTTTATAC

TAAAAAAAAAATTAATAATTTTTAAATATGAAACTCTATAGGGTCTTCTCGTCTTTTAA  
ATTAATTTTAGCTTTTTAACTAAAAAATAAATTTTTAATGTTTAAATAGAGACAGAA  
ATTTTTTATCCAACCATTCATTCCAGCTTCTAATTAAGAACTAATGATTATGCTA  
CCTTAGCACGGTCAAATACCGCGGCCATTTAAATCCTCAGAGGGCAGGCTAAT  
TATTAGACAAGAAAGGGGGAAAAAGAAGCTTTTGGAACCTTAGGAATAATTTAT  
GCTATAATAGCTATCGGATTATTAGGATTCGTAGTTTGAGCTCACCATATATTTAC  
AGTAGGAATAGATGTAGATACCCGAGCTTACTTCACTTCAGCAACTATAATTATT  
GCGGTTCCAACCTGGGATTAAGTCTTTAGATGACTAGCCACCTTTCATGGAACCT  
CAAATTTTAAATAGACCAGTAACCCTGTGAGCTTTAGGTTTTGTATTTTTATTTAC  
AGTAGGAGGATTAACAGGGGTAATTTAGCTAATTCTTCAATTGATATTATTCTCC  
ACGATACTTACTATGTAGTAGCTCATTTTCACTATGTTCTTTCTATAGGAGCTGTA  
TTTGCAATTATAGCCGGAATTGTCCAATGATTCCCATTATTTACCGGACTAACCT  
TAAATAATTTTTTTTTAAAAACCCAATTTATTACTATATTTTTAGGTGTAAATTTAAC  
ATTTTTTCTCAACACTTTTTAGGGCTAAGAGGAATGCCTCGGCGATATTCGGAT  
TATCCAGATGCTTTCCTATCTGAAATGCCATTTTCATCTATTGGTTCCATTATTTTC  
TCTCACAAGAATTATCTTTTTTTTTATTTATCTTATGAGAAAGGCTTTCTTCCCAAC  
GTAATCTTTGAGAACTTTAAATGTAACAACCTTCAATTGAATGGTTTCAAGCCCTA  
CCCCCTAGTG

CL2\_1

CGGGCGATGTGTACATATTTTAGAGCTTTAATCATCTTAAAAAATCTAAAAAATT  
ACTCTCAAATCAAATTCAAATTTTTTTAACAAAAATTATTTTCAAATAAATTTATT  
GTAACCCATTTCTTCTTTATTATAAACTACACCTTGATCTGATTTATTTTTTAATAA  
AAAATTTTAAATATTTATAATTCTATTAATAATTTAACTACGACGATATATAAAC  
TAATAAATAAAGTGCATCTAATCGTGGACTATCGATTATAGAACAGGTTCTCTG  
AAAAGACTAAAATACCGCCAAATTTTTTAATTTTCAAGAACATAACTAATACTAAT  
TAAGTAAAAAATTTACATTTTTAATAATAGGGTATCTAACAGACCTAATATCCCC  
AGCTTCTACACCAAAAATTAATTTAATCCAACATCGAGGTCGCAATCTTTATCTT  
CGATTAGAACTCTTTGATAATATTACGCTGTTATCCCTAAGGTAATTAATCTTAC  
AATTACTAATAGCTCAAGTATACATAAATTAATGATTTAAATTTAAAAAAGTT  
CAATTAATTTTTCAATCACCCCAATTAATAAATTAAAAAAATTAATAATTTTTATAC  
TAAAAAAAATTAATAATTTTTAAATATGAAACTCTATAGGGTCTTCTCGTCTTTTAA  
ATTAATTTTAGCTTTTTAACTAAAAAATAAATTTTTAATGTTTAAATAGAGACAGAA  
ATTTTTTATCCAACCATTCATTCCAGCTTCTAATTAAGAACTAATGATTATGCTA  
CCTTAGCACGGTCAAATACCGCGGCCATTTAAATCCTCAGAGGGCAGGCTAAT  
TATTAGACAAGAAAGGGGGAAAAAGAAGCTTTTGGAACCTTAGGAATAATTTAT  
GCTATAATAGCTATCGGATTATTAGGATTCGTAGTTTGAGCTCACCATATATTTAC  
AGTAGGAATAGATGTAGATACCCGAGCTTACTTCACTTCAGCAACTATAATTATT  
GCGGTTCCAACCTGGGATTAAGTCTTTAGATGACTAGCCACCTTTCATGGAACCT  
CAAATTTTAAATAGACCAGTAACCCTGTGAGCTTTAGGTTTTGTATTTTTATTTAC  
AGTAGGAGGATTAACAGGGGTAATTTAGCTAATTCTTCAATTGATATTATTCTCC  
ACGATACTTACTATGTAGTAGCTCATTTTCACTATGTTCTTTCTATAGGAGCTGTA  
TTTGCAATTATAGCCGGAATTGTCCAATGATTCCCATTATTTACCGGACTAACCT  
TAAATAATTTTTTTTTAAAAACCCAATTTATTACTATATTTTTAGGTGTAAATTTAAC  
ATTTTTTCTCAACACTTTTTAGGGCTAAGAGGAATGCCTCGGCGATATTCGGAT  
TATCCAGATGCTTTCCTATCTGAAATGCCATTTTCATCTATTGGTTCCATTATTTTC  
TCTCACAAGAATTATCTTTTTTTTTATTTATCTTATGAGAAAGGCTTTCTTCCCAAC  
GTAATCTTTGAGAACTTTAAATGTAACAACCTTCAATTGAATGGTTTCAAGCCCTA  
CCCCCTAGTG

CL2\_2

CGGGCGATGTGTACATATTTTAGAGCTTTAATCATCTTAAAAAATCTAAAAAATT

ACTCTCAAATCCAAATTCAAATTTTTTTAAACAAAAATTATTTTCAAATAAATTTATT  
GTAACCCATTTCTTCTTTATTATAAACTACACCTTGATCTGATTTATTTTTTAATAA  
AAAATTTTAAATATTTATAATTCTATTAATAATTTAAACTACGACGATATATAAAC  
TAATAAATAAAGTGTCATCTAATCGTGGACTATCGATTATAGAACAGGTTCCCTCTG  
AAAAGACTAAAATACCGCCAAATTTTTTAAATTTTCAAGAACATAACTAATACTAAT  
TAAGTAAAAAAATTTACATTTTTTAATAATAGGGTATCTAACAGACCTAATATCCCC  
AGCTTCTACACCAAAAATTAATTTAATCCAACATCGAGGTCGCAATCTTTATCTT  
CGATTAGAACTCTTTGATAATATTACGCTGTTATCCCTAAGGTAATTAATCTTAC  
AATTATTACTAATAGCTCAAGTATACATAAATTAATGATTTAAATTTAAAAAAAGTT  
CAATTAATTTTTCAATCACCCCAATTAATAAATTAAAAAAATTAATAATTTTTATAC  
TAAAAAAAATTAATAATTTTTAAATATGAACTCTATAGGGTCTTCTCGTCTTTTTAA  
ATTAATTTTAGCTTTTTAACTAAAAATAAATTTTTAATGTTTAAATAGAGACAGAA  
ATTTTTTATCCAACCATTCATTCCAGCTTCTAATTAAGAACTAATGATTATGCTA  
CCTTAGCACGGTCAAATACCGCGGCCATTTAAATCCTCAGAGGGCAGGCTAAT  
TATTAGACAAGAAAGGGGGAAAAAAGAAGCTTTTGGAACCTTAGGAATAATTTAT  
GCTATAATAGCTATCGGATTATTAGGATTCGTAGTTTGAGCTCACCATATATTTAC  
AGTAGGAATAGATGTAGATACCCGAGCTTACTTCACTTCAGCAACTATAATTATT  
GCGGTTCCAACCTGGGATTAAGTCTTTAGATGACTAGCCACCTTTCATGGAACT  
CAAATTTTAAATAGACCAGTAACCCTGTGAGCTTTAGGTTTTGTATTTTTATTTAC  
AGTAGGAGGATTAACAGGGGTAATTTAGCTAATTCTTCAATTGATATTATTCTCC  
ACGATACTTACTATGTAGTAGCTCATTTTCACTATGTTCTTTCTATAGGAGCTGTA  
TTTGCAATTATAGCCGGAATTGTCCAATGATTCCCATTTTACCGGACTAACCT  
TAAATAATTTTTTTTTAAAAACCCAATTTATTACTATATTTTTAGGTGTAAATTTAAC  
ATTTTTTCTCAACACTTTTTAGGGCTAAGAGGAATGCCTCGGCGATATTCGGAT  
TATCCAGATGCTTTCCTATCTGAAATGCCATTTTCATCTATTGGTTCCATTATTTT  
TCTCACAAGAATTATCTTTTTTTTTATTTATCTTATGAGAAAGGCTTTCTTCCCAAC  
GTAATCTTTGAGAACTTTAAATGTAACAACCTTCAATTGAATGGTTTCAAGCCCTA  
CCCCCTAGTG

EQU\_5

CGGGCGATGTGTACATATTTTAGAGCTTTAATCATCTTAAAAAATCTAAAAAATT  
ACTCTCAAATCCAAATTCAAATTTTTTTAAACAAAAATTATTTTCAAATAAATTTATT  
GTAACCCATTTCTTCTTTATTATAAACTACACCTTGATCTGATTTATTTTTTAATAA  
AAAATTTTAAATATTTATAATTCTATTAATAATTTAAACTACGACGATATATAAAC  
TAATAAATAAAGTGTCATCTAATCGTGGACTATCGATTATAGAACAGGTTCCCTCTG  
AAAAGACTAAAATACCGCCAAATTTTTTAAATTTTCAAGAACATAACTAATACTAAT  
TAAGTAAAAAAATTTACATTTTTTAATAATAGGGTATCTAACAGACCTAATATCCCC  
AGCTTCTACACCAAAAATTAATTTAATCCAACATCGAGGTCGCAATCTTTATCTT  
CGATTAGAACTCTTTGATAATATTACGCTGTTATCCCTAAGGTAATTAATCTTAC  
AATTATTACTAATAGCTCAAGTATACATAAATTAATGATTTAAATTTAAAAAAAGTT  
CAATTAATTTTTCAATCACCCCAATTAATAAATTAAAAAAATTAATAATTTTTATAC  
TAAAAAAAATTAATAATTTTTAAATATGAACTCTATAGGGTCTTCTCGTCTTTTTAA  
ATTAATTTTAGCTTTTTAACTAAAAATAAATTTTTAATGTTTAAATAGAGACAGAA  
ATTTTTTATCCAACCATTCATTCCAGCTTCTAATTAAGAACTAATGATTATGCTA  
CCTTAGCACGGTCAAATACCGCGGCCATTTAAATCCTCAGAGGGCAGGCTAAT  
TATTAGACAAGAAAGGGGGAAAAAAGAAGCTTTTGGAACCTTAGGAATAATTTAT  
GCTATAATAGCTATCGGATTATTAGGATTCGTAGTTTGAGCTCACCATATATTTAC  
AGTAGGAATAGATGTAGATACCCGAGCTTACTTCACTTCAGCAACTATAATTATT  
GCGGTTCCAACCTGGGATTAAGTCTTTAGATGACTAGCCACCTTTCATGGAACT  
CAAATTTTAAATAGACCAGTAACCCTGTGAGCTTTAGGTTTTGTATTTTTATTTAC  
AGTAGGAGGATTAACAGGGGTAATTTAGCTAATTCTTCAATTGATATTATTCTCC

ACGATACTTACTATGTAGTAGCTCATTTTTCACTATGTTCTTTCTATAGGAGCTGTA  
TTTGCAATTATAGCCGGAATTGTCCAATGATTTCCATTATTTACCGGACTAACCT  
TAAATAATTTTTTTTTAAAAACCCAATTTATTACTATATTTTTAGGTGTAAATTTAAC  
ATTTTTTCTCAACACTTTTTAGGGCTAAGAGGAATGCCTCGGCGATATTCGGAT  
TATCCAGATGCTTTCACTATCTGAAATGCCATTTTCATCTATTGGTTCCATTATTTCT  
TCTCACAAGAATTATCTTTTTTTTTATTTATCTTATGAGAAAGGCTTTCTTCCCAAC  
GTAATCTTTGAGAACTTTAAATGTAACAACCTTCAATTGAATGGTTTCAAGCCCTA  
CCCCCTAGTG

FRA\_CHA\_5

CGGGCGATGTGTACATATTTTAGAGCTTTAATCATCTTAAAAAATCTAAAAAATT  
ACTCTCAAATCCAAATTCAAATTTTTTAAACAAAAATTATTTTAAAATAAATTTATT  
GTAACCCATTTCTTCTTTATTATAAACTACACCTTGATCTGATTTATTTTTAATAA  
AAAATTTTAAATATTTATAATTCTATTAATAATTTAAACTACGACGATATATAAAC  
TAATAAATAAAGTGCATCTAATCGTGGACTATCGATTATAGAACAGGTTCCCTCTG  
AAAAGACTAAAATACCGCCAAATTTTTAATTTTCAAGAACATAACTAATACTAAT  
TAAGTAAAAAATTTACATTTTTAATAATAGGGTATCTAACAGACCTAATATTTCC  
AGCTTCTGCACCAAAAATTAATTTAATCCAACATCGAGGTCGCAATCTTTATCTT  
CGATTAGAACTCTTTGATAATATTACGCTGTTATCCCTAAGGTAATTAATCTTAC  
AATTATTACTAATAGCTCAAGTATACATAAATTAATGATTTAAATTTAAAAAAGTT  
CGATTAATTTTTCAATCACCCCAATTAATAAATTAATAAATTTAAAAATTTTATAC  
TaAAAAAATTAATAATTTTTAAATATGAACTCTATAGGGTCTTCTCGTCTTTTTAA  
ATTAATCTTAGCTTTTTAACTAAAAATAAATTTTTAATGTTTAAATAGAGACAGAA  
ATTTTTTATCCAACCATTCAATCCAGCTTCTAATTAAGAACTAATGATTATGCTA  
CCTTAGCACGGTCAAATACCGCGGCCATTTAATCCTCAGAGGGCAGGCTAAT  
TATTAGACAAGAAAGGGGAAAAAGAAGCTTTTGGAACCTTAGGAATAATTTAT  
GCCATGATAGCTATCGGATTATTAGGATTCGTAGTTTGAGCTCACCATATATTTA  
CAGTAGGGATAGATGTAGATACCCGAGCTTACTTCACTTCAGCAACTATAATTAT  
TGCGGTTCCAACCTGGGATTAAGTCTTTAGATGACTAGCCACCTTTTCATGGAAC  
CAAATTTTAAATAGACCAGTAACCCTGTGAGCTTTAGGCTTTGTATTTTTATTTAC  
AGTAGGAGGATTAACAGGGGTAATTTAGCTAATTCTTCAATTGATATTATTCTTC  
ACGATACTTACTATGTAGTAGCTCATTTTTCACTATGTTCTTTCTATAGGAGCTGTA  
TTTGCAATTATAGCCGGAATTGTCCAATGATTTCCATTATTTACTGGACTAACCTT  
AAATAATTTTTTTTTAAAAACCCAATTTATTACTATATTTTTAGGTGTAAATTTAACA  
TTTTTCTCAACACTTTTTAGGGCTAAGAGGAATGCCTCGGCGATATTCGGATT  
ATCCAGATGCTTTCACTATCTGAAATGCCATTTTCATCTATTGGTTCCATTATTTCT  
CTCACAAGAATTATCTTTTTTTTTATTTATCTTATGAGAAAGGCTTTCTTCCCAACG  
TAAATCTTTGAGAACTTTAAATGTAACAACCTTCAATTGAATGGTTACAAGCCCTAC  
CCCCTAGTG

hev1

CGGGCGATGTGTACATATTTTAGAGCTTTAATCATCTTAAAAAATCTAAAAAATT  
ACTCTCAAATCCAAATTCAAATTTTTTAAACAAAAATTATTTTAAAATAAATTTATT  
GTAACCCATTTCTTCTTTATTATAAACTACACCTTGATCTGATTTATTTTTAATAA  
AAAATTTTAAATATTTATAATTCTATTAATAATTTAAACTACGACGATATATAAAC  
TAATAAATAAAGTGCATCTAATCGTGGACTATCGATTATAGAACAGGTTCCCTCTG  
AAAAGACTAAAATACCGCCAAATTTTTAATTTTCAAGAACATAACTAATACTAAT  
TAAGTAAAAAATTTACATTTTTAATAATAGGGTATCTAACAGACCTAATATTTCC  
AGCTTCTGCACCAAAAATTAATTTAATCCAACATCGAGGTCGCAATCTTTATCTT  
CGATTAGAACTCTTTGATAATATTACGCTGTTATCCCTAAGGTAATTAATCTTAC  
AATTATTACTAATAGCTCAAGTATACATAAATTAATGATTTAAATTTAAAAAAGTT  
CAATTAATTTTTCAATCACCCCAATTAATAAATTAATAAATTTAAAAATTTTATAC

TaAAAAAAAAATTA AAAATTTTTAAATATGAAACTCTATAGGGTCTTCTCGTCTTTTTAA  
ATTAATTTTAGCTTTTTAACTAAAAATAAATTTTTAATGTTTAAATAGAGACAGAA  
ATTTTTTATCCAACCATTCATTCCAGCTTCTAATTAAGAACTAATGATTATGCTA  
CCTTAGCACGGTCAAATACCGCGGCCATTTAAATCCTCAGAGGGCAGGCTAAT  
TATTAGACAAGAAAGGGGGAAAAAGAAGCTTTTGGAACCTTAGGAATAATTTAT  
GCCATGATAGCTATCGGATTATTAGGATTCGTAGTTTGAGCTCACCATATATTTA  
CAGTAGGGATAGATGTAGATACCCGAGCTTACTTCACTTCAGCAACTATAATTAT  
TGCGGTTCCAACCTGGGATTAAGTCTTTAGATGACTAGCCACCTTTCATGGAAC  
CAAATTTTAAATAGACCAGTAACCCTGTGAGCTTTAGGTTTTGTATTTTTATTAC  
AGTAGGAGGATTAACAGGGGTAATTTAGCTAATTCTTCAATTGATATTATTCTTC  
ACGATACTTACTATGTAGTAGCTCATTTTCACTATGTTCTTTCTATAGGAGCTGTA  
TTTGCAATTATAGCCGGAATTGTCCAATGATTCCCATTTTACCGGACTAACCT  
TAAATAATTTTTTTTTAAAAACCCAATTTATTACTATTTTTTAGGTGTAAATTTAAC  
ATTTTTTCCCAACACTTTTTAGGGCTAAGAGGAATGCCTCGGCGATATTCCGGAT  
TATCCAGATGCTTTCCTATCTGAAATGCCATTTTCATCTATTGGTTCCATTATTTCT  
TCTCACAAGAATTATCTTTTTTTTTATTATCTTATGAGAAAGGCTTTCTTCCCAAC  
GTAATCTTTGAGA ACTTTAAATGTAACA ACTTCAATTGAATGGTTACAAGCCCTA  
CCCCCTAGTG

MEX\_COE\_2

CGGGCGATGTGTACATATTTTAGAGCTTTAATCATCTTAAAAAATCTAAAAAATT  
ACTCTCAAATCAAATCAAATTTTTTAAACAAAAATTATTTTCAAATAAATTTATT  
GTAACCCATTTCTTCTTTATTATAAACTACACCTTGATCTGATTTATTTTTAATAA  
AAAATTTTAAATATTTATAATTCTATTAATAATTTAACTACGACGATATATAAAC  
TAATAAATAAAGTGCATCTAATCGTGGACTATCGATTATAGAACAGGTTCTCTG  
AAAAGACTAAAATACCGCAAATTTTTTAAATTTTCAAGAACATAACTAATACTAAT  
TAAGTAAAAAATTTACATTTTTAATAATAGGGTATCTAACAGACCTAATATTCCC  
AGCTTCTGCACCAAAAATTAATTTAATCCAACATCGAGGTCGCAATCTTTATCTT  
CGATTAGA ACTCTTTGATAATATTACGCTGTTATCCCTAAGGTAATTAATCTTAC  
AATTATTACTAATAGCTCAAGTATACATAAATTAATGATTTAAATTTAAAAAAGTT  
CAATTAATTTTTCAATCACCCCAATTAATAATTAAAAAAATTA AAAATTTTTATAC  
TaAAAAAAAAATTA AAAATTTTTAAATATGAAACTCTATAGGGTCTTCTCGTCTTTTTAA  
ATTAATTTTAGCTTTTTAACTAAAAATAAATTTTTAATGTTTAAATAGAGACAGAA  
ATTTTTTATCCAACCATTCATTCCAGCTTCTAATTAAGAACTAATGATTATGCTA  
CCTTAGCACGGTCAAATACCGCGGCCATTTAAATCCTCAGAGGGCAGGCTAAT  
TATTAGACAAGAAAGGGGGAAAAAGAAGCTTTTGGAACCTTAGGAATAATTTAT  
GCCATAATAGCTATCGGATTATTAGGATTCGTAGTTTGAGCTCACCATATATTTA  
CAGTAGGGATAGATGTAGATACCCGAGCTTACTTCACTTCAGCAACTATAATTAT  
TGCGGTTCCAACCTGGGATTAAGTCTTTAGATGACTAGCCACCTTTCATGGAAC  
CAAATTTTAAATAGACCAGTAACCCTGTGAGCTTTAGGTTTTGTATTTTTATTAC  
AGTAGGAGGATTAACAGGGGTAATTTAGCTAATTCTTCAATTGATATTATTCTTC  
ACGATACTTACTATGTAGTAGCTCATTTTCACTATGTTCTTTCTATAGGAGCTGTA  
TTTGCAATTATAGCCGGAATTGTCCAATGATTCCCATTTTACTGGACTAACCTT  
AAATAATTTTTTTTTAAAAACCCAATTTATTACTATTTTTTAGGTGTAAATTTAAC  
TTTTTCTCAACACTTTTTAGGGCTAAGAGGAATGCCTCGGCGATATTCCGGATT  
ATCCAGATGCTTTCCTATCTGAAATGCCATTTTCATCTATTGGTTCCATTATTTCT  
CTCACAAGAATTATCTTTTTTTTTATTATCTTATGAGAAAGGCTTTCTTCCCAACG  
TAAATCTTTGAGA ACTTTAAATGTAACA ACTTCAATTGAATGGTTACAAGCCCTAC  
CCCCTAGTG

MEX\_SAG\_5

CGGGCGATGTGTACATATTTTAGAGCTTTAATCATCTTAAAAAATCTAAAAAATT

ACTCTCAAATCCAAATTCAAATTTTTTTAAACAAAAATTATTTTCAAATAAATTTATT  
GTAACCCATTTCTTCTTTATTATAAACTACACCTTGATCTGATTTATTTTTTAATAA  
AAAATTTTAAATATTTATAATTCTATTAATAATTTAAACTACGACGATATATAAAC  
TAATAAATAAAGTGCATCTAATCGTGGACTATCGATTATAGAACAGGTTCCCTCTG  
AAAAGACTAAAATACCGCCAAATTTTTTAAATTTTCAAGAACATAACTAATACTAAT  
TAAGTAAAAAAATTTACATTTTTTAATAATAGGGTATCTAACAGACCTAATATTCCC  
AGCTTCTGCACCAAAAATTAATTTTAATCCAACATCGAGGTCGCAATCTTTATCTT  
CGATTAGAACTCTTTGATAATATTACGCTGTTATCCCTAAGGTAATTAATCTTAC  
AATTATTACTAATAGCTCAAGTATACATAAATTAATGATTTAAATTTAAAAAAAGTT  
CAATTAATTTTTCAATCACCCCAATTAATAAATTAAAAAAATTAATAATTTTTATAC  
TaAAAAAAATTAATAATTTTTAAATATGAAACTCTATAGGGTCTTCTCGTCTTTTTAA  
ATTAATTTTAGCTTTTTAACTAAAAATAAATTTTTAATGTTTAAATAGAGACAGAA  
ATTTTTTATCCAACCATTCATTCCAGCTTCTAATTAAGAACTAATGATTATGCTA  
CCTTAGCACGGTCAAATACCGCGGCCATTTAAATCCTCAGAGGGCAGGCTAAT  
TATTAGACAAGAAAGGGGGAAAAAAGAAGCTTTTGGAACCTTAGGAATAATTTAT  
GCCATAATAGCTATCGGATTATTAGGATTCGTAGTTTGAGCTCACCATATATTTA  
CAGTAGGGATAGATGTAGATACCCGAGCTTACTTCACTTCAGCAACTATAATTAT  
TGCGGTTCCAACCTGGGATTAAGTCTTTAGATGACTAGCCACCTTTCATGGAAC  
CAAATTTTAAATAGACCAGTAACCCTGTGAGCTTTAGGTTTTGTATTTTTATTTAC  
AGTAGGAGGATTAACAGGGGTAATTTAGCTAATTCTTCAATTGATATTATTCTTC  
ACGATACTTACTATGTAGTAGCTCATTTTCACTATGTTCTTTCTATAGGAGCTGTA  
TTTGCAATTATAGCCGGAATTGTCCAATGATTCCCATTTTACTGGGCTAACCT  
TAAATAATTTTTTTTTAAAAACCCAATTTATTACTATTTTTTAGGTGTAAATTTAAC  
ATTTTTTCTCAACACTTTTTAGGGCTAAGAGGAATGCCTCGGCGATATTCGGAT  
TATCCAGATGCTTTCCTATCTGAAATGCCATTTTCATCTATTGGTTCCATTATTTT  
TCTCACAAGAATTATCTTTTTTTTTATTTATCTTATGAGAAAGGCTTTCTTCCCAAC  
GTAATCTTTGAGAACTTTAAATGTAACAACCTTCAATTGAATGGTTACAAGCCCTA  
CCCCCTAGTG

MEX\_SCA

CGGGCGATGTGTACATATTTTAGAGCTTTAATCATCTTAAAAAATCTAAAAAATT  
ACTCTCAAATCCAAATTCAAATTTTTTTAAACAAAAATTATTTTCAAATAAATTTATT  
GTAACCCATTTCTTCTTTATTATAAACTACACCTTGATCTGATTTATTTTTTAATAA  
AAAATTTTAAATATTTATAATTCTATTAATAATTTAAACTACGACGATATATAAAC  
TAATAAATAAAGTGCATCTAATCGTGGACTATCGATTATAGAACAGGTTCCCTCTG  
AAAAGACTAAAATACCGCCAAATTTTTTAAATTTTCAAGAACATAACTAATACTAAT  
TAAGTAAAAAAATTTACATTTTTTAATAATAGGGTATCTAACAGACCTAATATTCCC  
AGCTTCTGCACCAAAAATTAATTTTAATCCAACATCGAGGTCGCAATCTTTATCTT  
CGATTAGAACTCTTTGATAATATTACGCTGTTATCCCTAAGGTAATTAATCTTAC  
AATTATTACTAATAGCTCAAGTATACATAAATTAATGATTTAAATTTAAAAAAAGTT  
CAATTAATTTTTCAATCACCCCAATTAATAAATTAAAAAAATTAATAATTTTTATAC  
TaAAAAAAATTAATAATTTTTAAATATGAAACTCTATAGGGTCTTCTCGTCTTTTTAA  
ATTAATTTTAGCTTTTTAACTAAAAATAAATTTTTAATGTTTAAATAGAGACAGAA  
ATTTTTTATCCAACCATTCATTCCAGCTTCTAATTAAGAACTAATGATTATGCTA  
CCTTAGCACGGTCAAATACCGCGGCCATTTAAATCCTCAGAGGGCAGGCTAAT  
TATTAGACAAGAAAGGGGGAAAAAAGAAGCTTTTGGAACCTTAGGAATAATTTAT  
GCCATAATAGCTATCGGATTATTAGGATTCGTAGTTTGAGCTCACCATATATTTA  
CAGTAGGGATAGATGTAGATACCCGAGCTTACTTCACTTCAGCACCTATGATTAT  
TGCGGTTCCAACCTGGGATTAAGTCTTTAGATGACTAGCCACCTTTCATGGAAC  
CAAATTTTAAATAGACCAGTAACCCTGTGAGCTTTAGGTTTTGTATTTTTATTTAC  
AGTAGGAGGATTAACAGGGGTAATTTAGCTAATTCTTCAATTGATATTATTCTTC



ACGATACTTACTATGTAGTAGCTCATTTTTCACTATGTTCTTTCTATAGGAGCTGTA  
TTTGCAATTATAGCCGGAATTGTCCAATGATTCCCATTATTTACTGGACTAACCTT  
AAATAATTTTTTTTTAAAAACCCAATTTATTACTATATTTTTAGGTGTAATTTAACA  
TTTTTTCCTCAACACTTTTTAGGGCTAAGAGGAATGCCTCGGCGATATTCGGATT  
ATCCAGATGCTTTCCTACTATCTGAAATGCCATTTTCATCTATTGGTTCCATTATTTCT  
CTCACAAGAATTATCTTTTTTTTTATTTATCTTATGAGAAAGGCTTTCTTCCCAACG  
TAAATCTTTGAGAACTTTAAATGTAACAACCTCAATTGAATGGTTACAAGCCCTAC  
CCCCTAGTG

MEX\_SFP

CGGGCGATGTGTACATATTTTAGAGCTTTAATCATCTTAAAAAATCTAAAAAATT  
ACTCTCAAATCCAAATCAAATTTTTTAAACAAAAATTATTTTCAAATAAATTTATT  
GTAACCCATTTCTTCTTTATTATAAACTACACCTTGATCTGATTTATTTTTAATAA  
AAAATTTTAAATATTTATAATTCTATTAATAATTTAAACTACGACGATATATAAAC  
TAATAAATAAAGTGCATCTAATCGTGGACTATCGATTATAGAACAGGTTCCCTCTG  
AAAAGACTAAAATACCGCCAAATTTTTTAATTTTCAAGAACATAACTAATACTAAT  
TAAGTAAAAAATTTACATTTTTAATAATAGGGTATCTAACAGACCTAATATTCCC  
AGCTTCTGCACCAAAAATTAATTTAATCCAACATCGAGGTCGCAATCTTTATCTT  
CGATTAGAACTCTTTGATAATATTACGCTGTTATCCCTAAGGTAATTAATCTTAC  
AATTATTACTAATAGCTCAAGTATACATAAATTAATGATTTAAATTTAAAAAAGTT  
CAATTAATTTTTCAATCACCCCAATTAATAATTAATAAATTAATAAATTTTATAC  
TaAAAAAATTAATAATTTTTAAATATGAACTCTATAGGGTCTTCTCGTCTTTTTAA  
ATTAATTTTAGCTTTTTAACTAAAAATAAATTTTTAATGTTTAAATAGAGACAGAA  
ATTTTTTATCCAACCATTCAATCCAGCTTCTAATTAAGAACTAATGATTATGCTA  
CCTTAGCACGGTCAAATACCGCGGCCATTTAATCCTCAGAGGGCAGGCTAAT  
TATTAGACAAGAAAGGGGAAAAAGAAGCTTTTGGAACCTTAGGAATAATTTAT  
GCCATAATAGCTATCGGATTATTAGGATTCGTAGTTTGAGCTCACCATATATTTA  
CAGTAGGGATAGATGTAGATACCCGAGCTTACTTCACTTCAGCAACTATAATTAT  
TGCGGTTCCAACCTGGGATTAAGTCTTTAGATGACTAGCCACCTTTCATGGAAC  
CAAATTTTAAATAGACCAGTAACCCTGTGAGCTTTAGGTTTTGTATTTTTATTTAC  
AGTAGGAGGATTAACAGGGGTAATTTAGCTAATTCTTCAATTGATATTATTCTTC  
ACGATACTTACTATGTAGTAGCTCATTTTTCACTATGTTCTTTCTATAGGAGCTGTA  
TTTGCAATTATAGCCGGAATTGTCCAATGATTCCCATTATTTACTGGACTAACCTT  
AAATAATTTTTTTTTAAAAACCCAATTTATTACTATATTTTTAGGTGTAATTTAACA  
TTTTTTCCTCAACACTTTTTAGGGCTAAGAGGAATGCCTCGGCGATATTCGGATT  
ATCCAGATGCTTTCCTACTATCTGAAATGCCATTTTCATCTATTGGTTCCATTATTTCT  
CTCACAAGAATTATCTTTTTTTTTATTTATCTTATGAGAAAGGCTTTCTTCCCAACG  
TAAATCTTTGAGAACTTTAAATGTAACAACCTCAATTGAATGGTTACAAGCCCTAC  
CCCCTAGTG

MEX\_SJS\_2

CGGGCGATGTGTACATATTTTAGAGCTTTAATCATCTTAAAAAATCTAAAAAATT  
ACTCTCAAATCCAAATCAAATTTTTTAAACAAAAATTATTTTCAAATAAATTTATT  
GTAACCCATTTCTTCTTTATTATAAACTACACCTTGATCTGATTTATTTTTAATAA  
AAAATTTTAAATATTTATAATTCTATTAATAATTTAAACTACGACGATATATAAAC  
TAATAAATAAAGTGCATCTAATCGTGGACTATCGATTATAGAACAGGTTCCCTCTG  
AAAAGACTAAAATACCGCCAAATTTTTTAATTTTCAAGAACATAACTAATACTAAT  
TAAGTAAAAAATTTACATTTTTAATAATAGGGTATCTAACAGACCTAATATTCCC  
AGCTTCTGCACCAAAAATTAATTTAATCCAACATCGAGGTCGCAATCTTTATCTT  
CGATTAGAACTCTTTGATAATATTACGCTGTTATCCCTAAGGTAATTAATCTTAC  
AATTATTACTAATAGCTCAAGTATACATAAATTAATGATTTAAATTTAAAAAAGTT  
CAATTAATTTTTCAATCACCCCAATTAATAATTAATAAATTAATAAATTTTATAC

TaAAAAAAAAATTAATAATTTTTAAATATGAAACTCTATAGGGTCTTCTCGTCTTTTTAA  
ATTAATTTTAGCTTTTTAACTAAAAATAAATTTTTAATGTTTAAATAGAGACAGAA  
ATTTTTTATCCAACCATTCATTCCAGCTTCTAATTAAGAACTAATGATTATGCTA  
CCTTAGCACGGTCAAATACCGCGGCCATTTAAATCCTCAGAGGGCAGGCTAAT  
TATTAGACAAGAAAGGGGGAAAAAGAACCTTTTGGAACCTTAGGAATAATTTAT  
GCCATAATAGCTATCGGATTATTAGGATTCGTAGTTTGAGCTCACCATATATTTA  
CAGTAGGGATAGATGTAGATACCCGAGCTTACTTCACTTCAGCAACTATAATTAT  
TGCGGTTCCAACCTGGAATTAAGTCTTTAGATGACTAGCCACCTTTCATGGAAC  
CAAATTTTAAATAGACCAGTAACCCTGTGAGCTTTAGGTTTTGTATTTTTATTAC  
AGTAGGAGGATTAACAGGGGTAATTTAGCTAATTCTTCAATTGATATTATTCTTC  
ACGATACTTACTATGTAGTAGCTCATTTTCACTATGTTCTTTCTATAGGAGCTGTA  
TTTGCAATTATAGCCGGAATTGTCCAATGATTCCCATTATTTACTGGACTAACCTT  
AAATAATTTTTTTTTAAAAACCCAATTTATTACTATATTTTTAGGTGTAATTTAACA  
TTTTTTCCTCAACACTTTTTAGGGCTAAGAGGAATGCCTCGGCGATATTCGGATT  
ATCCAGATGCTTTCACTATCTGAAATGCCATTTTCATCTATTGGTTCATTATTTCT  
CTCACAAGAATTATCTTTTTTTTTATTTATCTTATGAGAAAGGCTTTCTTCCCAACG  
TAAATCTTTGAGAACTTTAAATGTAACAACCTTCAATTGAATGGTTACAAGCCCTAC  
CCCCTAGTG

MEX\_STO

CGGGCGATGTGTACATATTTTAGAGCTTTAATCATCTTAAAAAATCTAAAAAATT  
ACTCTCAAATCAAATTCAAATTTTTTAAACAAAAATTATTTTCAAATAAATTTATT  
GTAACCCATTTCTTCTTTATTATAAACTACACCTTGATCTGATTTATTTTTAATAA  
AAAATTTTAAATATTTATAATTCTATTAATAATTTAACTACGACGATATATAAAC  
TAATAAATAAAGTGCATCTAATCGTGGACTATCGATTATAGAACAGGTTCTCTG  
AAAAGACTAAAATACCGCAAATTTTTAATTTCAAGAACATAACTAATACTAAT  
TAAGTAAAAAATTTACATTTTTAATAATAGGGTATCTAACAGACCTAATATTCCC  
AGCTTCTGCACCAAAAATTAATTTAATCCAACATCGAGGTCGCAATCTTTATCTT  
CGATTAGAACTCTTTGATAATATTACGCTGTTATCCCTAAGGTAATTAATCTTAC  
AATTACTAATAGCTCAAGTATACATAAATTAATGATTTAAATTTAAAAAAGTT  
CAATTAATTTTTCAATCACCCCAATTAATAATTAATAAATTTTATAC  
TaAAAAAAAAATTAATAATTTTTAAATATGAAACTCTATAGGGTCTTCTCGTCTTTTTAA  
ATTAATTTTAGCTTTTTAACTAAAAATAAATTTTTAATGTTTAAATAGAGACAGAA  
ATTTTTTATCCAACCATTCATTCCAGCTTCTAATTAAGAACTAATGATTATGCTA  
CCTTAGCACGGTCAAATACCGCGGCCATTTAAATCCTCAGAGGGCAGGCTAAT  
TATTAGACAAGAAAGGGGGAAAAAGAACCTTTTGGAACCTTAGGAATAATTTAT  
GCCATAATAGCTATCGGATTATTAGGATTCGTAGTTTGAGCTCACCATATATTTA  
CAGTAGGGATAGATGTAGATACCCGAGCTTACTTCACTTCAGCAACTATAATTAT  
TGCGGTTCCAACCTGGGATTAAGTCTTTAGATGACTAGCCACCTTTCATGGAAC  
CAAATTTTAAATAGACCAGTAACCCTGTGAGCTTTAGGTTTTGTATTTTTATTAC  
AGTAGGAGGATTAACAGGGGTAATTTAGCTAATTCTTCAATTGATATTATTCTTC  
ACGATACTTACTATGTAGTAGCTCATTTTCACTATGTTCTTTCTATAGGAGCTGTA  
TTTGCAATTATAGCCGGAATTGTCCAATGATTCCCATTATTTACTGGACTAACCTT  
AAATAATTTTTTTTTAAAAACCCAATTTATTACTATATTTTTAGGTGTAATTTAACA  
TTTTTTCCTCAACACTTTTTAGGGCTAAGAGGAATGCCTCGGCGATATTCGGATT  
ATCCAGATGCTTTCACTATCTGAAATGCCATTTTCATCTATTGGTTCATTATTTCT  
CTCACAAGAATTATCTTTTTTTTTATTTATCTTATGAGAAAGGCTTTCTTCCCAACG  
TAAATCTTTGAGAACTTTAAATGTAACAACCTTCAATTGAATGGTTACAAGCCCTAC  
CCCCTAGTG

MEX\_TLA\_1

CGGGCGATGTGTACATATTTTAGAGCTTTAATCATCTTAAAAAATCTAAAAAATT

ACTCTCAAATCCAAATTCAAATTTTTTTAAACAAAAATTATTTTCAAATAAATTTATT  
GTAACCCATTTCTTCTTTATTATAAACTACACCTTGATCTGATTTATTTTTTAATAA  
AAAATTTTAAATATTTATAATTCTATTAATAATTTAAACTACGACGATATATAAAC  
TAATAAATAAAGTGCATCTAATCGTGGACTATCGATTATAGAACAGGTTCCCTCTG  
AAAAGACTAAAATACCGCCAAATTTTTTAATTTTCAAGAACATAACTAATACTAAT  
TAAGTAAAAAAATTTACATTTTTTAATAATAGGGTATCTAACAGACCTAATATTCCC  
AGCTTCTGCACCAAAAATTAATTTAATCCAACATCGAGGTCGCAATCTTTATCTT  
CGATTAGAACTCTTTGATAATATTACGCTGTTATCCCTAAGGTAATTAATCTTAC  
AATTATTACTAATAGCTCAAGTATACATAAATTAATGATTTAAATTTAAAAAAAGTT  
CAATTAATTTTTCAATCACCCCAATTAATAAATTAAAAAAATTAATAATTTTTATAC  
TaAAAAAAATTAATAATTTTTAAATATGAAACTCTATAGGGTCTTCTCGTCTTTTTAA  
ATTAATTTTAGCTTTTTAACTAAAAATAAATTTTTAATGTTTAAATAGAGACAGAA  
ATTTTTTATCCAACCATTCATTCCAGCTTCTAATTAAGAACTAATGATTATGCTA  
CCTTAGCACGGTCAAATACCGCGGCCATTTAAATCCTCAGAGGGCAGGCTAAT  
TATTAGACAAGAAAGGGGGAAAAAGAAGCTTTTGGAACCTTAGGAATAATTTAT  
GCCATAATAGCTATCGGATTATTAGGATTCGTAGTTTGAGCTCACCATATATTTA  
CAGTAGGGATAGATGTAGATACCCGAGCTTACTTCACTTCAGCACCTATGATTAT  
TGCGGTTCCAACCTGGGATTAAGTCTTTAGATGACTAGCCACCTTTCATGGAAC  
CAAATTTTAAATAGACCAGTAACCCTGTGAGCTTTAGGTTTTGTATTTTTATTTAC  
AGTAGGAGGATTAACAGGGGTAATTTAGCTAATTCTTCAATTGATATTATTCTTC  
ACGATACTTACTATGTAGTAGCTCATTTTCACTATGTTCTTTCTATAGGAGCTGTA  
TTTGCAATTATAGCCGGAATTGTCCAATGATTCCCATTTTACTGGACTAACCTT  
AAATAATTTTTTTTTAAAAACCCAATTTATTACTATATTTTTAGGTGTAAATTTAACA  
TTTTTCTCAACACTTTTTAGGGCTAAGAGGAATGCCTCGGCGATATTCGGATT  
ATCCAGATGCTTTCATCTGAAATGCCATTTTCATCTATTGGTTCCATTATTTCT  
CTCACAAGAATTATCTTTTTTTATTTATCTTATGAGAAAGGCTTCTTCCCAACG  
TAAATCTTTGAGAACTTTAATGTAACAACCTTCAATTGAATGGTTACAAGCCCTAC  
CCCCTAGTG

MEX\_XOT\_3

CGGGCGATGTGTACATATTTTAGAGCTTTAATCATCTTAAAAAATCTAAAAAATT  
ACTCTCAAATCCAAATTCAAATTTTTTTAAACAAAAATTATTTTAAATAAATTTATT  
GTAACCCATTTCTTCTTTATTATAAACTACACCTTGATCTGATTTATTTTTTAATAA  
AAAATTTTAAATATTTATAATTCTATTAATAATTTAAACTACGACGATATATAAAC  
TAATAAATAAAGTGCATCTAATCGTGGACTATCGATTATAGAACAGGTTCCCTCTG  
AAAAGACTAAAATACCGCCAAATTTTTTAATTTTCAAGAACATAACTAATACTAAT  
TAAGTAAAAAAATTTACATTTTTTAATAATAGGGTATCTAACAGACCTAATATTCC  
AGCTTCTGCACCAAAAATTAATTTAATCCAACATCGAGGTCGCAATCTTTATCTT  
CGATTAGAACTCTTTGATAATATTACGCTGTTATCCCTAAGGTAATTAATCTTAC  
AATTATTACTAATAGCTCAAGTATACATAAATTAATGATTTAAATTTAAAAAAAGTT  
CAATTAATTTTTCAATCACCCCAATTAATAAATTAAAAAAATTAATAATTTTTATAC  
TaAAAAAAATTAATAATTTTTAAATATGAAACTCTATAGGGTCTTCTCGTCTTTTTAA  
ATTAATTTTAGCTTTTTAACTAAAAATAAATTTTTAATGTTTAAATAGAGACAGAA  
ATTTTTTATCCAACCATTCATTCCAGCTTCTAATTAAGAACTAATGATTATGCTA  
CCTTAGCACGGTCAAATACCGCGGCCATTTAAATCCTCAGAGGGCAGGCTAAT  
TATTAGACAAGAAAGGGGGAAAAAGAAGCTTTTGGAACCTTAGGAATAATTTAT  
GCCATGATAGCTATCGGATTATTAGGATTCGTAGTTTGAGCTCACCATATATTTA  
CAGTAGGGATAGATGTAGATACCCGAGCTTACTTCACTTCAGCAACTATAATTAT  
TGCGGTTCCAACCTGGGATTAAGTCTTTAGATGACTAGCCACCTTTCATGGAAC  
CAAATTTTAAATAGACCAGTAACCCTGTGAGCTTTAGGCTTTGTATTTTTATTTAC  
AGTAGGAGGATTAACAGGGGTAATTTAGCTAATTCTTCAATTGATATTATTCTTC

ACGATACTTACTATGTAGTAGCTCATTTTTCACTATGTTCTTTCTATAGGAGCTGTA  
TTTGCAATTATAGCCGGAATTGTCCAATGATTTCCATTATTTACTGGACTAACCTT  
AAATAATTTTTTTTTAAAAACCCAATTTATTACTATATTTTTAGGTGTAAATTTAACA  
TTTTTTCCTCAACACTTTTTAGGGCTAAGAGGAATGCCTCGGCGATATTCGGATT  
ATCCAGATGCTTTCCTACTATCTGAAATGCCATTTTCATCTATTGGTTCCATTATTTCT  
CTCACAAGAATTATCTTTTTTTTTATTTATCTTATGAGAAAGGCTTTCTTCCCAACG  
TAAATCTTTGAGAACTTTAAATGTAACAACCTCAATTGAATGGTTACAAGCCCTAC  
CCCCTAGTG

MEX\_YOH

CGGGCGATGTGTACATATTTTAGAGCTTTAATCATCTTAAAAAATCTAAAAAATT  
ACTCTCAAATCCAAATCAAATTTTTTAAACAAAAATTATTTTCAAATAAATTTATT  
GTAACCCATTTCTTCTTTATTATAAACTACACCTTGATCTGATTTATTTTTAATAA  
AAAATTTAAATATTTATAATTCTATTAATAATTTAAACTACGACGATATATAAAC  
TAATAAATAAAGTGCATCTAATCGTGGACTATCGATTATAGAACAGGTTCCCTCTG  
AAAAGACTAAAATACCGCCAAATTTTTAATTTTCAAGAACATAACTAATACTAAT  
TAAGTAAAAAATTTACATTTTTAATAATAGGGTATCTAACAGACCTAATATCCCC  
AGCTTCTACACCAAAAATTAATTTAATCCAACATCGAGGTCGCAATCTTTATCTT  
CGATTAGAACTCTTTGATAATATTACGCTGTTATCCCTAAGGTAATTAATCTTAC  
AATTATTAATAAGCTCAAGTATACATAAATTAATGATTTAAATTTAAAAAAGTT  
CAATTAATTTTTCAATCACCCCAATTAATAAATTAATAAATTAATAAATTTTATAC  
TaAAAAAATTAATAATTTTTAAATATGAACTCTATAGGGTCTTCTCGTCTTTTTAA  
ATTAATTTTAGCTTTTTAACTAAAAATAAATTTTTAATGTTTAAATAGAGACAGAA  
ATTTTTTATCCAACCATTCAATCCAGCTTCTAATTAAGAACTAATGATTATGCTA  
CCTTAGCACGGTCAAATACCGCGGCCATTTAATCCTCAGAGGGCAGGCTAAT  
TATTAGACAAGAAAGGGGAAAAAGAAGCTTTTGGAACCTTAGGAATAATTTAT  
GCTATAATAGCTATCGGATTATTAGGATTCGTAGTTTGAGCTCACCATATATTTAC  
AGTAGGAATAGATGTAGATACCCGAGCTTACTTCACTTCAGCAACTATAATTATT  
GCGGTTCCAAGTGGGATTAAGTCTTTAGATGACTAGCCACCTTTCATGGAAGT  
CAAATTTTAAATAGACCAGTAACCCTGTGAGCTTTAGGTTTTGTATTTTTATTTAC  
AGTAGGAGGATTAACAGGGGTAATTTAGCTAATTCTTCAATTGATATTATTCTCC  
ACGATACTTACTATGTAGTAGCTCATTTTTCACTATGTTCTTTCTATAGGAGCTGTA  
TTTGCAATTATAGCCGGAATTGTCCAATGATTTCCATTATTTACCGGACTAACCT  
TAAATAATTTTTTTTTAAAAACCCAATTTATTACTATATTTTTAGGTGTAAATTTAAC  
ATTTTTTCTCAACACTTTTTAGGGCTAAGAGGAATGCCTCGGCGATATTCGGAT  
TATCCAGATGCTTTCCTACTATCTGAAATGCCATTTTCATCTATTGGTTCCATTATTTCT  
TCTCACAAGAATTATCTTTTTTTTTATTTATCTTATGAGAAAGGCTTTCTTCCCAAC  
GTAATCTTTGAGAACTTTAAATGTAACAACCTCAATTGAATGGTTTCAAGCCCTA  
CCCCTAGTG

moc5

CGGGCGATGTGTACATATTTTAGAGCTTTAATCATCTTAAAAAATCTAAAAAATT  
ACTCTCAAATCCAAATCAAATTTTTTAAACAAAAATTATTTTAAATAAATTTATT  
GTAACCCATTTCTTCTTTATTATAAACTACACCTTGATCTGATTTATTTTTAATAA  
AAAATTTAAATATTTATAATTCTATTAATAATTTAAACTACGACGATATATAAAC  
TAATAAATAAAGTGCATCTAATCGTGGACTATCGATTATAGAACAGGTTCCCTCTG  
AAAAGACTAAAATACCGCCAAATTTTTAATTTTCAAGAACATAACTAATACTAAT  
TAAGTAAAAAATTTACATTTTTAATAATAGGGTATCTAACAGACCTAATATTTCC  
AGCTTCTGCACCAAAAATTAATTTAATCCAACATCGAGGTCGCAATCTTTATCTT  
CGATTAGAACTCTTTGATAATATTACGCTGTTATCCCTAAGGTAATTAATCTTAC  
AATTATTAATAAGCTCAAGTATACATAAATTAATGATTTAAATTTAAAAAAGTT  
CAATTAATTTTTCAATCACCCCAATTAATAAATTAATAAATTAATAAATTTTATAC

TaAAAAAAAAATTA AAAATTTTTAAATATGAAACTCTATAGGGTCTTCTCGTCTTTTTAA  
ATTAATTTTAGCTTTTTAACTAAAAATAAATTTTTAATGTTTAAATAGAGACAGAA  
ATTTTTTATCCAACCATTCATTCCAGCTTCTAATTAAGAACTAATGATTATGCTA  
CCTTAGCACGGTCAAATAACCGCGGCCATTTAAATCCTCAGAGGGCAGGCTAAT  
TATTAGACAAGAAAGGGGGAAAAAGAAGCTTTTGGAACCTTAGGAATAATTTAT  
GCCATGATAGCTATCGGATTATTAGGATTCGTAGTTTGAGCTCACCATATATTTA  
CAGTAGGGATAGATGTAGATACCCGAGCTTACTTCACTTCAGCAACTATAATTAT  
TGCGGTTCCAACCTGGGATTAAGTCTTTAGATGACTAGCCACCTTTCATGGAAC  
CAAATTTTAAATAGACCAGTAACCCTGTGAGCTTTAGGTTTTGTATTTTTATTAC  
AGTAGGAGGATTAACAGGGGTAATTTAGCTAATTCTTCAATTGATATTATTCTTC  
ACGATACTTACTATGTAGTAGCTCATTTTCACTATGTTCTTTCTATAGGAGCTGTA  
TTTGCAATTATAGCCGGAATTGTCCAATGATTCCCATTTTACCGGACTAACCT  
TAAATAATTTTTTTTTAAAAACCCAATTTATTACTATTTTTTAGGTGTAAATTTAAC  
ATTTTTTCCCAACACTTTTTAGGGCTAAGAGGAATGCCTCGGCGATATTCGGAT  
TATCCAGATGCTTTCCTATCTGAAATGCCATTTTCATCTATTGGTTCCATTATTTT  
TCTCACAAGAATTATCTTTTTTTTTATTATCTTATGAGAAAGGCTTTCTTCCCAAC  
GTAATCTTTGAGA ACTTTAAATGTAACA ACTTCAATTGAATGGTTACAAGCCCTA  
CCCCCTAGTG

PE2\_1

CGGGCGATGTGTACATATTTTAGAGCTTTAATCATCTTAAAAAATCTAAAAAATT  
ACTCTCAAATCAAATTCAAATTTTTTAAACAAAAATTATTTTCAAATAAATTTATT  
GTAACCCATTTCTTCTTTATTATAAACTACACCTTGATCTGATTTATTTTTAATAA  
AAAATTTTAAATATTTATAATTCTATTAATAATTTAACTACGACGATATATAAAC  
TAATAAATAAAGTGCATCTAATCGTGGACTATCGATTATAGAACAGGTTCTCTG  
AAAAGACTAAAATAACCGCAAATTTTTTAAATTTTCAAGAACATAACTAATACTAAT  
TAAGTAAAAAATTTACATTTTTAATAATAGGGTATCTAACAGACCTAATATCCCC  
AGCTTCTACACCAAAAATTAATTTAATCCAACATCGAGGTCGCAATCTTTATCTT  
CGATTAGA ACTCTTTGATAATATTACGCTGTTATCCCTAAGGTAATTAATCTTAC  
AATTACTAATAGCTCAAGTATACATAAATTAATGATTTAAATTTAAAAAAGTT  
CAATTAATTTTTCAATCACCCCAATTAATAATTAAAAAAATTA AAAATTTTTATAC  
TAAAAAAAATTA AAAATTTTTAAATATGAAACTCTATAGGGTCTTCTCGTCTTTTTAA  
ATTAATTTTAGCTTTTTAACTAAAAATAAATTTTTAATGTTTAAATAGAGACAGAA  
ATTTTTTATCCAACCATTCATTCCAGCTTCTAATTAAGAACTAATGATTATGCTA  
CCTTAGCACGGTCAAATAACCGCGGCCATTTAAATCCTCAGAGGGCAGGCTAAT  
TATTAGACAAGAAAGGGGGAAAAAGAAGCTTTTGGAACCTTAGGAATAATTTAT  
GCTATAATAGCTATCGGATTATTAGGATTCGTAGTTTGAGCTCACCATATATTTAC  
AGTAGGAATAGATGTAGATACCCGAGCTTACTTCACTTCAGCAACTATAATTATT  
GCGGTTCCAACCTGGGATTAAGTCTTTAGATGACTAGCCACCTTTCATGGAAC  
CAAATTTTAAATAGACCAGTAACCCTGTGAGCTTTAGGTTTTGTATTTTTATTAC  
AGTAGGAGGATTAACAGGGGTAATTTAGCTAATTCTTCAATTGATATTATTCTCC  
ACGATACTTACTATGTAGTAGCTCATTTTCACTATGTTCTTTCTATAGGAGCTGTA  
TTTGCAATTATAGCCGGAATTGTCCAATGATTCCCATTTTACCGGACTAACCT  
TAAATAATTTTTTTTTAAAAACCCAATTTATTACTATTTTTTAGGTGTAAATTTAAC  
ATTTTTTCTCAACACTTTTTAGGGCTAAGAGGAATGCCTCGGCGATATTCGGAT  
TATCCAGATGCTTTCCTATCTGAAATGCCATTTTCATCTATTGGTTCCATTATTTT  
TCTCACAAGAATTATCTTTTTTTTTATTATCTTATGAGAAAGGCTTTCTTCCCAAC  
GTAATCTTTGAGA ACTTTAAATGTAACA ACTTCAATTGAATGGTTTACAAGCCCTA  
CCCCCTAGTG

PE2\_3

CGGGCGATGTGTACATATTTTAGAGCTTTAATCATCTTAAAAAATCTAAAAAATT

ACTCTCAAATCCAAATTCAAATTTTTTTAAACAAAAATTATTTTCAAATAAATTTATT  
GTAACCCATTTCTTCTTTATTATAAACTACACCTTGATCTGATTTATTTTTTAATAA  
AAAATTTTAAATATTTATAATTCTATTAATAATTTAAACTACGACGATATATAAAC  
TAATAAATAAAGTGCATCTAATCGTGGACTATCGATTATAGAACAGGTTCTCTG  
AAAAGACTAAAATACCGCCAAATTTTTTAATTTTCAAGAACATAACTAATACTAAT  
TAAGTAAAAAAATTTACATTTTTTAATAATAGGGTATCTAACAGACCTAATATCCCC  
AGCTTCTACACCAAAAATTAATTTAATCCAACATCGAGGTCGCAATCTTTATCTT  
CGATTAGAACTCTTTGATAATATTACGCTGTTATCCCTAAGGTAATTAATCTTAC  
AATTATTACTAATAGCTCAAGTATACATAAATTAATGATTTAAATTTAAAAAAAGTT  
CAATTAATTTTTCAATCACCCCAATTAATAAATTAAAAAAATTAATAATTTTTATAC  
TAAAAAAAATTAATAATTTTTAAATATGAACTCTATAGGGTCTTCTCGTCTTTTTAA  
ATTAATTTTAGCTTTTTAACTAAAAATAAATTTTTAATGTTTAAATAGAGACAGAA  
ATTTTTTATCCAACCATTCATTCCAGCTTCTAATTAAGAACTAATGATTATGCTA  
CCTTAGCACGGTCAAATACCGCGGCCATTTAAATCCTCAGAGGGCAGGCTAAT  
TATTAGACAAGAAAGGGGGAAAAAAGAAGCTTTTGGAACCTTAGGAATAATTTAT  
GCTATAATAGCTATCGGATTATTAGGATTCGTAGTTTGAGCTCACCATATATTTAC  
AGTAGGAATAGATGTAGATACCCGAGCTTACTTCACTTCAGCAACTATAATTATT  
GCGGTTCCAACCTGGGATTAAGTCTTTAGATGACTAGCCACCTTTCATGGAACT  
CAAATTTTAAATAGACCAGTAACCCTGTGAGCTTTAGGTTTTGTATTTTTATTTAC  
AGTAGGAGGATTAACAGGGGTAATTTAGCTAATTCTTCAATTGATATTATTCTCC  
ACGATACTTACTATGTAGTAGCTCATTTTCACTATGTTCTTTCTATAGGAGCTGTA  
TTTGCAATTATAGCCGGAATTGTCCAATGATTCCCATTTTACCGGACTAACCT  
TAAATAATTTTTTTTTAAAAACCCAATTTATTACTATATTTTTAGGTGTAAATTTAAC  
ATTTTTTCTCAACACTTTTTAGGGCTAAGAGGAATGCCTCGGCGATATTCGGAT  
TATCCAGATGCTTTCCTATCTGAAATGCCATTTTCATCTATTGGTTCCATTATTTT  
TCTCACAAGAATTATCTTTTTTTTTATTTATCTTATGAGAAAGGCTTTCTTCCCAAC  
GTAATCTTTGAGAACTTTAATGTAACAACCTTCAATTGAATGGTTTCAAGCCCTA  
CCCCCTAGTG

PE2\_4

CGGGCGATGTGTACATATTTTAGAGCTTTAATCATCTTAAAAAATCTAAAAAATT  
ACTCTCAAATCCAAATTCAAATTTTTTTAAACAAAAATTATTTTCAAATAAATTTATT  
GTAACCCATTTCTTCTTTATTATAAACTACACCTTGATCTGATTTATTTTTTAATAA  
AAAATTTTAAATATTTATAATTCTATTAATAATTTAAACTACGACGATATATAAAC  
TAATAAATAAAGTGCATCTAATCGTGGACTATCGATTATAGAACAGGTTCTCTG  
AAAAGACTAAAATACCGCCAAATTTTTTAATTTTCAAGAACATAACTAATACTAAT  
TAAGTAAAAAAATTTACATTTTTTAATAATAGGGTATCTAACAGACCTAATATCCCC  
AGCTTCTACACCAAAAATTAATTTAATCCAACATCGAGGTCGCAATCTTTATCTT  
CGATTAGAACTCTTTGATAATATTACGCTGTTATCCCTAAGGTAATTAATCTTAC  
AATTATTACTAATAGCTCAAGTATACATAAATTAATGATTTAAATTTAAAAAAAGTT  
CAATTAATTTTTCAATCACCCCAATTAATAAATTAAAAAAATTAATAATTTTTATAC  
TAAAAAAAATTAATAATTTTTAAATATGAACTCTATAGGGTCTTCTCGTCTTTTTAA  
ATTAATTTTAGCTTTTTAACTAAAAATAAATTTTTAATGTTTAAATAGAGACAGAA  
ATTTTTTATCCAACCATTCATTCCAGCTTCTAATTAAGAACTAATGATTATGCTA  
CCTTAGCACGGTCAAATACCGCGGCCATTTAAATCCTCAGAGGGCAGGCTAAT  
TATTAGACAAGAAAGGGGGAAAAAAGAAGCTTTTGGAACCTTAGGAATAATTTAT  
GCTATAATAGCTATCGGATTATTAGGATTCGTAGTTTGAGCTCACCATATATTTAC  
AGTAGGAATAGATGTAGATACCCGAGCTTACTTCACTTCAGCAACTATAATTATT  
GCGGTTCCAACCTGGGATTAAGTCTTTAGATGACTAGCCACCTTTCATGGAACT  
CAAATTTTAAATAGACCAGTAACCCTGTGAGCTTTAGGTTTTGTATTTTTATTTAC  
AGTAGGAGGATTAACAGGGGTAATTTAGCTAATTCTTCAATTGATATTATTCTCC

ACGATACTTACTATGTAGTAGCTCATTTTTCACTATGTTCTTTCTATAGGAGCTGTA  
TTTGCAATTATAGCCGGAATTGTCCAATGATTCCCATTATTTACCGGACTAACCT  
TAAATAATTTTTTTTTAAAAACCCAATTTATTACTATATTTTTAGGTGTAAATTTAAC  
ATTTTTTCTCAACACTTTTTAGGGCTAAGAGGAATGCCTCGGCGATATTCGGAT  
TATCCAGATGCTTTCACTATCTGAAATGCCATTTTCATCTATTGGTTCCATTATTTT  
TCTCACAAGAATTATCTTTTTTTTTATTATCTTATGAGAAAGGCTTTCTTCCCAAC  
GTAATCTTTGAGAACTTTAAATGTAACAACCTTCAATTGAATGGTTTCAAGCCCTA  
CCCCCTAGTG

PE2\_5

CGGGCGATGTGTACATATTTTAGAGCTTTAATCATCTTAAAAAATCTAAAAAATT  
ACTCTCAAATCCAAATCAAATTTTTTAAACAAAAATTATTTTCAAATAAATTTATT  
GTAACCCATTTCTTCTTTATTATAAACTACACCTTGATCTGATTTATTTTTAATAA  
AAAATTTTAAATATTTATAATTCTATTAATAATTTAAACTACGACGATATATAAAC  
TAATAAATAAAGTGCATCTAATCGTGGACTATCGATTATAGAACAGGTTCTCTG  
AAAAGACTAAAATACCGCCAAATTTTTTAATTTTCAAGAACATAACTAATACTAAT  
TAAGTAAAAAATTTACATTTTTAATAATAGGGTATCTAACAGACCTAATATCCCC  
AGCTTCTACACCAAAAATTAATTTAATCCAACATCGAGGTCGCAATCTTTATCTT  
CGATTAGAACTCTTTGATAATATTACGCTGTTATCCCTAAGGTAATTAATCTTAC  
AATTATTACTAATAGCTCAAGTATACATAAATTAATGATTTAAATTTAAAAAAGTT  
CAATTAATTTTTCAATCACCCCAATTAATAATTAAAAAAATTAATAATTTTTATAC  
TAAAAAAAATTAATAATTTTTAATATGAAACTCTATAGGGTCTTCTCGTCTTTTTAA  
ATTAATTTTAGCTTTTTAACTAAAAATAAATTTTTAATGTTTAAATAGAGACAGAA  
ATTTTTTATCCAACCATTCAATCCAGCTTCTAATTAAGAACTAATGATTATGCTA  
CCTTAGCACGGTCAAATACCGCGGCCATTTAATCCTCAGAGGGCAGGCTAAT  
TATTAGACAAGAAAGGGGGAAAAAGAAGCTTTTGGAACCTTAGGAATAATTTAT  
GCTATAATAGCTATCGGATTATTAGGATTCGTAGTTTGAGCTCACCATATATTTAC  
AGTAGGAATAGATGTAGATACCCGAGCTTACTTCACTTCAGCAACTATAATTATT  
GCGGTTCCAAGTGGGATTAAGTCTTTAGATGACTAGCCACCTTTTCATGGAAGT  
CAAATTTTAAATAGACCAGTAACCCTGTGAGCTTTAGGTTTTGTATTTTTATTTAC  
AGTAGGAGGATTAACAGGGGTAATTTAGCTAATTCTTCAATTGATATTATTCTCC  
ACGATACTTACTATGTAGTAGCTCATTTTTCACTATGTTCTTTCTATAGGAGCTGTA  
TTTGCAATTATAGCCGGAATTGTCCAATGATTCCCATTATTTACCGGACTAACCT  
TAAATAATTTTTTTTTAAAAACCCAATTTATTACTATATTTTTAGGTGTAAATTTAAC  
ATTTTTTCTCAACACTTTTTAGGGCTAAGAGGAATGCCTCGGCGATATTCGGAT  
TATCCAGATGCTTTCACTATCTGAAATGCCATTTTCATCTATTGGTTCCATTATTTT  
TCTCACAAGAATTATCTTTTTTTTTATTATCTTATGAGAAAGGCTTTCTTCCCAAC  
GTAATCTTTGAGAACTTTAAATGTAACAACCTTCAATTGAATGGTTTCAAGCCCTA  
CCCCCTAGTG

PE2\_6

CGGGCGATGTGTACATATTTTAGAGCTTTAATCATCTTAAAAAATCTAAAAAATT  
ACTCTCAAATCCAAATCAAATTTTTTAAACAAAAATTATTTTCAAATAAATTTATT  
GTAACCCATTTCTTCTTTATTATAAACTACACCTTGATCTGATTTATTTTTAATAA  
AAAATTTTAAATATTTATAATTCTATTAATAATTTAAACTACGACGATATATAAAC  
TAATAAATAAAGTGCATCTAATCGTGGACTATCGATTATAGAACAGGTTCTCTG  
AAAAGACTAAAATACCGCCAAATTTTTTAATTTTCAAGAACATAACTAATACTAAT  
TAAGTAAAAAATTTACATTTTTAATAATAGGGTATCTAACAGACCTAATATCCCC  
AGCTTCTACACCAAAAATTAATTTAATCCAACATCGAGGTCGCAATCTTTATCTT  
CGATTAGAACTCTTTGATAATATTACGCTGTTATCCCTAAGGTAATTAATCTTAC  
AATTATTACTAATAGCTCAAGTATACATAAATTAATGATTTAAATTTAAAAAAGTT  
CAATTAATTTTTCAATCACCCCAATTAATAATTAAAAAAATTAATAATTTTTATAC

TAAAAAAAAAATTAATAATTTTTAAATATGAAACTCTATAGGGTCTTCTCGTCTTTTAA  
ATTAATTTTAGCTTTTTAACTAAAAATAAATTTTTAATGTTTAAATAGAGACAGAA  
ATTTTTTATCCAACCATTCATTCCAGCTTCTAATTAAGAACTAATGATTATGCTA  
CCTTAGCACGGTCAAATAACCGCGGCCATTTAAATCCTCAGAGGGCAGGCTAAT  
TATTAGACAAGAAAGGGGGAAAAAGAAGCTTTTGGAACCTTAGGAATAATTTAT  
GCTATAATAGCTATCGGATTATTAGGATTCGTAGTTTGAGCTCACCATATATTTAC  
AGTAGGAATAGATGTAGATACCCGAGCTTACTTCACTTCAGCAACTATAATTATT  
GCGGTTCCAACCTGGGATTAAGTCTTTAGATGACTAGCCACCTTTCATGGAACCT  
CAAATTTTAAATAGACCAGTAACCCTGTGAGCTTTAGGTTTTGTATTTTTATTTAC  
AGTAGGAGGATTAACAGGGGTAATTTAGCTAATTCTTCAATTGATATTATTCTCC  
ACGATACTTACTATGTAGTAGCTCATTTTCACTATGTTCTTTCTATAGGAGCTGTA  
TTTGCAATTATAGCCGGAATTGTCCAATGATTCCCATTATTTACCGGACTAACCT  
TAAATAATTTTTTTTTAAAAACCCAATTTATTACTATATTTTTAGGTGTAAATTTAAC  
ATTTTTTCTCAACACTTTTTAGGGCTAAGAGGAATGCCTCGGCGATATTCGGAT  
TATCCAGATGCTTTCCTATCTGAAATGCCATTTTCATCTATTGGTTCCATTATTTTC  
TCTCACAAGAATTATCTTTTTTTTTATTTATCTTATGAGAAAGGCTTTCTTCCCAAC  
GTAATCTTTGAGAACTTTAAATGTAACAACCTTCAATTGAATGGTTTCAAGCCCTA  
CCCCCTAGTG

PE2\_7

CGGGCGATGTGTACATATTTTAGAGCTTTAATCATCTTAAAAAATCTAAAAAATT  
ACTCTCAAATCAAATTCAAATTTTTTTAACAAAAATTATTTTCAAATAAATTTATT  
GTAACCCATTTCTTCTTTATTATAAACTACACCTTGATCTGATTTATTTTTTAATAA  
AAAATTTTAAATATTTATAATTCTATTAATAATTTAACTACGACGATATATAAAC  
TAATAAATAAAGTGCATCTAATCGTGGACTATCGATTATAGAACAGGTTCTCTG  
AAAAGACTAAAATACCGCCAAATTTTTTAATTTTCAAGAACATAACTAATACTAAT  
TAAGTAAAAAATTTACATTTTTAATAATAGGGTATCTAACAGACCTAATATCCCC  
AGCTTCTACACCAAAAATTAATTTAATCCAACATCGAGGTCGCAATCTTTATCTT  
CGATTAGAACTCTTTGATAATATTACGCTGTTATCCCTAAGGTAATTAATCTTAC  
AATTACTAATAGCTCAAGTATACATAAATTAATGATTTAAATTTAAAAAAGTT  
CAATTAATTTTTCAATCACCCCAATTAATAATTAAAAAAATTAATAATTTTTATAC  
TAAAAAAAATTAATAATTTTTAAATATGAAACTCTATAGGGTCTTCTCGTCTTTTAA  
ATTAATTTTAGCTTTTTAACTAAAAATAAATTTTTAATGTTTAAATAGAGACAGAA  
ATTTTTTATCCAACCATTCATTCCAGCTTCTAATTAAGAACTAATGATTATGCTA  
CCTTAGCACGGTCAAATAACCGCGGCCATTTAAATCCTCAGAGGGCAGGCTAAT  
TATTAGACAAGAAAGGGGGAAAAAGAAGCTTTTGGAACCTTAGGAATAATTTAT  
GCTATAATAGCTATCGGATTATTAGGATTCGTAGTTTGAGCTCACCATATATTTAC  
AGTAGGAATAGATGTAGATACCCGAGCTTACTTCACTTCAGCAACTATAATTATT  
GCGGTTCCAACCTGGGATTAAGTCTTTAGATGACTAGCCACCTTTCATGGAACCT  
CAAATTTTAAATAGACCAGTAACCCTGTGAGCTTTAGGTTTTGTATTTTTATTTAC  
AGTAGGAGGATTAACAGGGGTAATTTAGCTAATTCTTCAATTGATATTATTCTCC  
ACGATACTTACTATGTAGTAGCTCATTTTCACTATGTTCTTTCTATAGGAGCTGTA  
TTTGCAATTATAGCCGGAATTGTCCAATGATTCCCATTATTTACCGGACTAACCT  
TAAATAATTTTTTTTTAAAAACCCAATTTATTACTATATTTTTAGGTGTAAATTTAAC  
ATTTTTTCTCAACACTTTTTAGGGCTAAGAGGAATGCCTCGGCGATATTCGGAT  
TATCCAGATGCTTTCCTATCTGAAATGCCATTTTCATCTATTGGTTCCATTATTTTC  
TCTCACAAGAATTATCTTTTTTTTTATTTATCTTATGAGAAAGGCTTTCTTCCCAAC  
GTAATCTTTGAGAACTTTAAATGTAACAACCTTCAATTGAATGGTTTCAAGCCCTA  
CCCCCTAGTG

PE\_MAN\_12

CGGGCGATGTGTACATATTTTAGAGCTTTAATCATCTTAAAAAATCTAAAAAATT



ACTCTCAAATCCAAATTCAAATTTTTTTAAACAAAAATTATTTTCAAATAAATTTATT  
GTAACCCATTTCTTCTTTATTATAAACTACACCTTGATCTGATTTATTTTTTAATAA  
AAAATTTTAAATATTTATAATTCTATTAATAATTTAACTACGACGATATATAAAC  
TAATAAATAAAGTGCATCTAATCGTGGACTATCGATTATAGAACAGGTTCTCTG  
AAAAGACTAAAATACCGCCAAATTTTTTAATTTTCAAGAACATAACTAATACTAAT  
TAAGTAAAAAAATTTACATTTTTTAATAATAGGGTATCTAACAGACCTAATATCCCC  
AGCTTCTACACCAAAAATTAATTTAATCCAACATCGAGGTCGCAATCTTTATCTT  
CGATTAGAACTCTTTGATAATATTACGCTGTTATCCCTAAGGTAATTAATCTTAC  
AATTATTACTAATAGCTCAAGTATACATAAATTAATGATTTAAATTTAAAAAAAGTT  
CAATTAATTTTTCAATCACCCCAATTAATAAATTAATAAATTAATAAATTTTTATAC  
TaAAAAAAATTAATAATTTTTAAATATGAAACTCTATAGGGTCTTCTCGTCTTTTTAA  
ATTAATTTTAGCTTTTTAACTAAAAATAAATTTTTAATGTTTAAATAGAGACAGAA  
ATTTTTTATCCAACCATTCATTCCAGCTTCTAATTAAGAACTAATGATTATGCTA  
CCTTAGCACGGTCAAATACCGCGGCCATTTAAATCCTCAGAGGGCAGGCTAAT  
TATTAGTCAAGAAAGGGGGAAAAAAGAACCTTTTGGAACCTTAGGAATAATTTAT  
GCTATAATAGCTATCGGATTATTAGGATTCGTAGTTTGAGCTCACCATATATTTAC  
AGTAGGAATAGATGTAGATACCCGAGCTTACTTCACTTCAGCAACTATAATTATT  
GCGGTTCCAACCTGGGATTAAGTCTTTAGATGACTAGCCACCTTTCATGGAACT  
CAAATTTTAAATAGACCAGTAACCCTGTGAGCTTTAGGTTTTGTATTTTTATTTAC  
AGTAGGAGGATTAACAGGGGTAATTTAGCTAATTCTTCAATTGATATTATTCTCC  
ACGATACTTACTATGTAGTAGCTCATTTTCACTATGTTCTTTCTATAGGAGCTGTA  
TTTGCAATTATAGCCGGAATTGTCCAATGATTCCCATTTTACCGGACTAACCT  
TAAATAATTTTTTTTTAAAAACCCAATTTATTACTATATTTTTAGGTGTAAATTTAAC  
ATTTTTTCTCAACACTTTTTAGGGCTAAGAGGAATGCCTCGGCGATATTCGGAT  
TATCCAGATGCTTTCCTATCTGAAATGCCATTTTCATCTATTGGTTCCATTATTTT  
TCTCACAAGAATTATCTTTTTTTTTATTTATCTTATGAGAAAGGCTTTCTTCCCAAC  
GTAATCTTTGAGAACTTTAAATGTAACAACCTTCAATTGAATGGTTTCAAGCCCTA  
CCCCCTAGTG

PE\_MAN\_13

CGGGCGATGTGTACATATTTTAGAGCTTTAATCATCTTAAAAAATCTAAAAAATT  
ACTCTCAAATCCAAATTCAAATTTTTTTAAACAAAAATTATTTTCAAATAAATTTATT  
GTAACCCATTTCTTCTTTATTATAAACTACACCTTGATCTGATTTATTTTTTAATAA  
AAAATTTTAAATATTTATAATTCTATTAATAATTTAACTACGACGATATATAAAC  
TAATAAATAAAGTGCATCTAATCGTGGACTATCGATTATAGAACAGGTTCTCTG  
AAAAGACTAAAATACCGCCAAATTTTTTAATTTTCAAGAACATAACTAATACTAAT  
TAAGTAAAAAAATTTACATTTTTTAATAATAGGGTATCTAACAGACCTAATATCCCC  
AGCTTCTACACCAAAAATTAATTTAATCCAACATCGAGGTCGCAATCTTTATCTT  
CGATTAGAACTCTTTGATAATATTACGCTGTTATCCCTAAGGTAATTAATCTTAC  
AATTATTACTAATAGCTCAAGTATACATAAATTAATGATTTAAATTTAAAAAAAGTT  
CAATTAATTTTTCAATCACCCCAATTAATAAATTAATAAATTAATAAATTTTTATAC  
TaAAAAAAATTAATAATTTTTAAATATGAAACTCTATAGGGTCTTCTCGTCTTTTTAA  
ATTAATTTTAGCTTTTTAACTAAAAATAAATTTTTAATGTTTAAATAGAGACAGAA  
ATTTTTTATCCAACCATTCATTCCAGCTTCTAATTAAGAACTAATGATTATGCTA  
CCTTAGCACGGTCAAATACCGCGGCCATTTAAATCCTCAGAGGGCAGGCTAAT  
TATTAGACAAGAAAGGGGGAAAAAAGAACCTTTTGGAACCTTAGGAATAATTTAT  
GCTATAATAGCTATCGGATTATTAGGATTCGTAGTTTGAGCTCACCATATATTTAC  
AGTAGGAATAGATGTAGATACCCGAGCTTACTTCACTTCAGCAACTATAATTATT  
GCGGTTCCAACCTGGGATTAAGTCTTTAGATGACTAGCCACCTTTCATGGAACT  
CAAATTTTAAATAGACCAGTAACCCTGTGAGCTTTAGGTTTTGTATTTTTATTTAC  
AGTAGGAGGATTAACAGGGGTAATTTAGCTAATTCTTCAATTGATATTATTCTCC

ACGATACTTACTATGTAGTAGCTCATTTTTCACTATGTTCTTTCTATAGGAGCTGTA  
TTTGCAATTATAGCCGGAATTGTCCAATGATTCCCATTATTTACCGGACTAACCT  
TAAATAATTTTTTTTTAAAAACCCAATTTATTACTATATTTTTAGGTGTAAATTTAAC  
ATTTTTCTCAACACTTTTTAGGGCTAAGAGGAATGCCTCGGCGATATTCGGAT  
TATCCAGATGCTTTCACTATCTGAAATGCCATTTTCATCTATTGGTTCCATTATTTT  
TCTCACAAGAATTATCTTTTTTTTTATTATCTTATGAGAAAGGCTTTCTTCCCAAC  
GTAATCTTTGAGAACTTTAAATGTAACAACCTTCAATTGAATGGTTTCAAGCCCTA  
CCCCCTAGTG

PE\_MAN\_15

CGGGCGATGTGTACATATTTTAGAGCTTTAATCATCTTAAAAAATCTAAAAAATT  
ACTCTCAAATCCAAATCAAATTTTTTAAACAAAAATTATTTTCAAATAAATTTATT  
GTAACCCATTTCTTCTTTATTATAAACTACACCTTGATCTGATTTATTTTTAATAA  
AAAATTTTAAATATTTATAATTCTATTAATAATTTAAACTACGACGATATATAAAC  
TAATAAATAAAGTGCATCTAATCGTGGACTATCGATTATAGAACAGGTTCCCTCTG  
AAAAGACTAAAATACCGCCAAATTTTTTAATTTTCAAGAACATAACTAATACTAAT  
TAAGTAAAAAATTTACATTTTTAATAATAGGGTATCTAACAGACCTAATATCCCC  
AGCTTCTACACCAAAAATTAATTTAATCCAACATCGAGGTCGCAATCTTTATCTT  
CGATTAGAACTCTTTGATAATATTACGCTGTTATCCCTAAGGTAATTAATCTTAC  
AATTATTACTAATAGCTCAAGTATACATAAATTAATGATTTAAATTTAAAAAAGTT  
CAATTAATTTTTCAATCACCCCAATTAATAATTAAAAAAATTAATAATTTTTATAC  
TaAAAAAATTAATAATTTTTAAATATGAACTCTATAGGGTCTTCTCGTCTTTTTAA  
ATTAATTTTAGCTTTTTAACTAAAAATAAATTTTTAATGTTTAAATAGAGACAGAA  
ATTTTTTATCCAACCATTCAATCCAGCTTCTAATTAAGAACTAATGATTATGCTA  
CCTTAGCACGGTCAAATACCGCGGCCATTTAATCCTCAGAGGGCAGGCTAAT  
TATTAGACAAGAAAGGGGAAAAAGAACCTTTTGGAACCTTAGGAATAATTTAT  
GCTATAATACCTATCGGATTATTAGGATTCGTAGTTTGAGCTCACCATATATTTAC  
AGTAGGAATAGATGTAGATACCCGAGCTTACTTCACTTCAGCAACTATAATTATT  
GCGGTTCCAAGTGGGATTAAGTCTTTAGATGACTAGCCACCTTTTCATGGAAGT  
CAAATTTTAAATAGACCAGTAACCCTGTGAGCTTTAGGTTTTGTATTTTTATTTAC  
AGTAGGAGGATTAACAGGGGTAATTTAGCTAATTCTTCAATTGATATTATTCTCC  
ACGATACTTACTATGTAGTAGCTCATTTTTCACTATGTTCTTTCTATAGGAGCTGTA  
TTTGCAATTATAGCCGGAATTGTCCAATGATTCCCATTATTTACCGGACTAACCT  
TAAATAATTTTTTTTTAAAAACCCAATTTATTACTATATTTTTAGGTGTAAATTTAAC  
ATTTTTCTCAACACTTTTTAGGGCTAAGAGGAATGCCTCGGCGATATTCGGAT  
TATCCAGATGCTTTCACTATCTGAAATGCCATTTTCATCCATTGGTTCCATTATTTT  
TCTCACAAGAATTATCTTTTTTTTTATTATCTTATGAGAAAGGCTTTCTTCCCAAC  
GTAATCTGTGAGAACTTTAAATGTAACAACCTTCAATTGAATGGTTTCAAGCCCT  
ACCCCTAGTG

PE\_MAN\_16

CGGGCGATGTGTACATATTTTAGAGCTTTAATCATCTTAAAAAATCTAAAAAATT  
ACTCTCAAATCCAAATCAAATTTTTTAAACAAAAATTATTTTCAAATAAATTTATT  
GTAACCCATTTCTTCTTTATTATAAACTACACCTTGATCTGATTTATTTTTAATAA  
AAAATTTTAAATATTTATAATTCTATTAATAATTTAAACTACGACGATATATAAAC  
TAATAAATAAAGTGCATCTAATCGTGGACTATCGATTATAGAACAGGTTCCCTCTG  
AAAAGACTAAAATACCGCCAAATTTTTTAATTTTCAAGAACATAACTAATACTAAT  
TAAGTAAAAAATTTACATTTTTAATAATAGGGTATCTAACAGACCTAATATCCCC  
AGCTTCTACACCAAAAATTAATTTAATCCAACATCGAGGTCGCAATCTTTATCTT  
CGATTAGAACTCTTTGATAATATTACGCTGTTATCCCTAAGGTAATTAATCTTAC  
AATTATTACTAATAGCTCAAGTATACATAAATTAATGATTTAAATTTAAAAAAGTT  
CAATTAATTTTTCAATCACCCCAATTAATAATTAAAAAAATTAATAATTTTTATAC

TaAAAAAAAAATTTAAATATGAACTCTATAGGGTCTTCTCGTCTTTTAA  
ATTAATTTTAGCTTTTTAACTAAAAATAAATTTTAAATGTTTAAATAGAGACAGAA  
ATTTTTTATCCAACCATTCATTCCAGCTTCTAATTAAGAACTAATGATTATGCTA  
CCTTAGCACGGTCAAATACCGCGGCCATTTAAATCCTCAGAGGGCAGGCTAAT  
TATTAGACAAGAAAGGGGGAAAAAGAAGCTTTTGGAACCTTAGGAATAATTTAT  
GCTATAATAGCTATCGGATTATTAGGATTCGTAGTTTGAGCTCACCATATATTTAC  
AGTAGGAATAGATGTAGATACCCGAGCTTACTTCACTTCAGCAACTATAATTATT  
GCGGTTCCAACCTGGGATTAAGTCTTTAGATGACTAGCCACCTTTCATGGAACCT  
CAAATTTTAAATAGACCAGTCACCCTGTGAGCTTTAGGTTTTGTATTTTTATTTAC  
AGTAGGAGGATTAACAGGGGTAATTTAGCTAATTCTTCAATTGATATTATTCTCC  
ACGATACTTACTATGTAGTAGCTCATTTTCACTATGTTCTTTCTATAGGAGCTGTA  
TTTGCAATTATAGCCGGAATTGTCCAATGATTCCCATTATTTACCGGACTAACCT  
TAAATAATTTTTTTTTAAAAACCCAATTTATTACTATATTTTTAGGTGTAAATTTAAC  
ATTTTTTCTCAACACTTTTTAGGGCTAAGAGGAATGCCTCGGCGATATTCGGAT  
TATCCAGATGCTTTCCTATCTGAAATGCCATTTTCATCTATTGGTTCCATTATTTT  
TCTCACAAGAATTATCTTTTTTTTTATTTATCTTATGAGAAAGGCTTTCTTCCCAAC  
GTAATCTTTGAGAACTTTAAATGTAACAACCTTCAATTGAATGGTTTCAAGCCCTA  
CCCCCTAGTG

PE\_MAN\_19

CGGGCGATGTGTACATATTTTAGAGCTTTAATCATCTTAAAAAATCTAAAAAATT  
ACTCTCAAATCAAATCAAATTTTTTAAACAAAAATTATTTTCAAATAAATTTATT  
GTAACCCATTTCTTCTTTATTATAAACTACACCTTGATCTGATTTATTTTTAATAA  
AAAATTTTAAATATTTATAATTCTATTAATAATTTAACTACGACGATATATAAAC  
TAATAAATAAAGTGCATCTAATCGTGGACTATCGATTATAGAACAGGTTCTCTG  
AAAAGACTAAAATACCGCAAATTTTTTAAATTTCAAGAACATAACTAATACTAAT  
TAAGTAAAAAATTTACATTTTTAATAATAGGGTATCTAACAGACCTAATATCCCC  
AGCTTCTACACCAAAAATTAATTTAATCCAACATCGAGGTCGCAATCTTTATCTT  
CGATTAGAACTCTTTGATAATATTACGCTGTTATCCCTAAGGTAATTAATCTTAC  
AATTACTAATAGCTCAAGTATACATAAATTAATGATTTAAATTTAAAAAAGTT  
CAATTAATTTTTCAATCACCCCAATTAATAATTAATAAATTAATAAATTTTTATAC  
TaAAAAAAAAATTTAAATATGAACTCTATAGGGTCTTCTCGTCTTTTAA  
ATTAATTTTAGCTTTTTAACTAAAAATAAATTTTAAATGTTTAAATAGAGACAGAA  
ATTTTTTATCCAACCATTCATTCCAGCTTCTAATTAAGAACTAATGATTATGCTA  
CCTTAGCACGGTCAAATACCGCGGCCATTTAAATCCTCAGAGGGCAGGCTAAT  
TATTAGACAAGAAAGGGGGAAAAAGAAGCTTTTGGAACCTTAGGAATAATTTAT  
GCTATAATAGCTATCGGATTATTAGGATTCGTAGTTTGAGCTCACCATATATTTAC  
AGTAGGAATAGATGTAGATACCCGAGCTTACTTCACTTCAGCAACTATAATTATT  
GCGGTTCCAACCTGGGATTAAGTCTTTAGATGACTAGCCACCTTTCATGGAACCT  
CAAATTTTAAATAGACCAGTCACCCTGTGAGCTTTAGGTTTTGTATTTTTATTTAC  
AGTAGGAGGATTAACAGGGGTAATTTAGCTAATTCTTCAATTGATATTATTCTCC  
ACGATACTTACTATGTAGTAGCTCATTTTCACTATGTTCTTTCTATAGGAGCTGTA  
TTTGCAATTATAGCCGGAATTGTCCAATGATTCCCATTATTTACCGGACTAACCT  
TAAATAATTTTTTTTTAAAAACCCAATTTATTACTATATTTTTAGGTGTAAATTTAAC  
ATTTTTTCTCAACACTTTTTAGGGCTAAGAGGAATGCCTCGGCGATATTCGGAT  
TATCCAGATGCTTTCCTATCTGAAATGCCATTTTCATCCATTGGTTCCATTATTTT  
TCTCACAAGAATTATCTTTTTTTTTATTTATCTTATGAGAAAGGCTTTCTTCCCAAC  
GTAATCTTTGAGAACTTTAAATGTAACAACCTTCAATTGAATGGTTTCAAGCCCTA  
CCCCCTAGTG

PE\_MAN\_2

CGGGCGATGTGTACATATTTTAGAGCTTTAATCATCTTAAAAAATCTAAAAAATT

ACTCTCAAATCCAAATTCAAATTTTTTTAAACAAAAATTATTTTCAAATAAATTTATT  
GTAACCCATTTCTTCTTTATTATAAACTACACCTTGATCTGATTTATTTTTTAATAA  
AAAATTTTAAATATTTATAATTCTATTAATAATTTAAACTACGACGATATATAAAC  
TAATAAATAAAGTGCATCTAATCGTGGACTATCGATTATAGAACAGGTTCTCTG  
AAAAGACTAAAATACCGCCAAATTTTTTAATTTTCAAGAACATAACTAATACTAAT  
TAAGTAAAAAAATTTACATTTTTTAATAATAGGGTATCTAACAGACCTAATATCCCC  
AGCTTCTACACCAAAAATTAATTTAATCCAACATCGAGGTCGCAATCTTTATCTT  
CGATTAGAACTCTTTGATAATATTACGCTGTTATCCCTAAGGTAATTAATCTTAC  
AATTACTAATAGCTCAAGTATACATAAATTAATGATTTAAATTTAAAAAAAGTT  
CAATTAATTTTTCAATCACCCCAATTAATAAATTAAAAAAATTAATAATTTTTATAC  
TaAAAAAAATTAATAATTTTTAAATATGAAACTCTATAGGGTCTTCTCGTCTTTTTAA  
ATTAATTTAGCTTTTTAACTAAAAATAAATTTTTAATGTTTAAATAGAGACAGAA  
ATTTTTTATCCAACCATTCATTCCAGCTTCTAATTAAGAACTAATGATTATGCTA  
CCTTAGCACGGTCAAATACCGCGGCCATTTAAATCCTCAGAGGGCAGGCTAAT  
TATTAGACAAGAAAGGGGGAAAAAAGAAGCTTTTGGAACCTTAGGAATAATTTAT  
GCTATAATAGCTATCGGATTATTAGGATTCGTAGTTTGAGCTCACCATATATTTAC  
AGTAGGAATAGATGTAGATACCCGAGCTTACTTCACTTCAGCAACTATAATTATT  
GCGGTTCCAACCTGGGATTAAGTCTTTAGATGACTAGCCACCTTTCATGGAACT  
CAAATTTTAAATAGACCAGTACCCTGTGAGCTTTAGGTTTTGTATTTTTATTTAC  
AGTAGGAGGATTAACAGGGGTAATTTAGCTAATTCTTCAATTGATATTATTCTCC  
ACGATACTTACTATGTAGTAGCTCATTTTCACTATGTTCTTTCTATAGGAGCTGTA  
TTTGCAATTATAGCCGGAATTGTCCAATGATTCCCATTTTACCGGACTAACCT  
TAAATAATTTTTTTTTAAAAACCCAATTTATTACTATATTTTTAGGTGTAAATTTAAC  
ATTTTTTCTCAACACTTTTTAGGGCTAAGAGGAATGCCTCGGCGATATTCGGAT  
TATCCAGATGCTTTCCTATCTGAAATGCCATTTTCATCTATTGGTTCCATTATTTT  
TCTCACAAGAATTATCTTTTTTTTTATTTATCTTATGAGAAAGGCTTTCTTCCCAAC  
GTAATCTTTGAGAACTTTAATGTAACAACCTTCAATTGAATGGTTTCAAGCCCTA  
CCCCCTAGTG

PE\_MAN\_23

CGGGCGATGTGTACATATTTTAGAGCTTTAATCATCTTAAAAAATCTAAAAAATT  
ACTCTCAAATCCAAATTCAAATTTTTTTAAACAAAAATTATTTTCAAATAAATTTATT  
GTAACCCATTTCTTCTTTATTATAAACTACACCTTGATCTGATTTATTTTTTAATAA  
AAAATTTTAAATATTTATAATTCTATTAATAATTTAAACTACGACGATATATAAAC  
TAATAAATAAAGTGCATCTAATCGTGGACTATCGATTATAGAACAGGTTCTCTG  
AAAAGACTAAAATACCGCCAAATTTTTTAATTTTCAAGAACATAACTAATACTAAT  
TAAGTAAAAAAATTTACATTTTTTAATAATAGGGTATCTAACAGACCTAATATCCCC  
AGCTTCTACACCAAAAATTAATTTAATCCAACATCGAGGTCGCAATCTTTATCTT  
CGATTAGAACTCTTTGATAATATTACGCTGTTATCCCTAAGGTAATTAATCTTAC  
AATTACTAATAGCTCAAGTATACATAAATTAATGATTTAAATTTAAAAAAAGTT  
CAATTAATTTTTCAATCACCCCAATTAATAAATTAAAAAAATTAATAATTTTTATAC  
TaAAAAAAATTAATAATTTTTAAATATGAAACTCTATAGGGTCTTCTCGTCTTTTTAA  
ATTAATTTAGCTTTTTAACTAAAAATAAATTTTTAATGTTTAAATAGAGACAGAA  
ATTTTTTATCCAACCATTCATTCCAGCTTCTAATTAAGAACTAATGATTATGCTA  
CCTTAGCACGGTCAAATACCGCGGCCATTTAAATCCTCAGAGGGCAGGCTAAT  
TATTAGACAAGAAAGGGGGAAAAAAGAAGCTTTTGGAACCTTAGGAATAATTTAT  
GCTATAATAGCTATCGGATTATTAGGATTCGTAGTTTGAGCTCACCATATATTTAC  
AGTAGGAATAGATGTAGATACCCGAGCTTACTTCACTTCAGCAACTATAATTATT  
GCGGTTCCAACCTGGGATTAAGTCTTTAGATGACTAGCCACCTTTCATGGAACT  
CAAATTTTAAATAGACCAGTACCCTGTGAGCTTTAGGTTTTGTATTTTTATTTAC  
AGTAGGAGGATTAACAGGGGTAATTTAGCTAATTCTTCAATTGATATTATTCTCC

ACGATACTTACTATGTAGTAGCTCATTTTTCACTATGTTCTTTCTATAGGAGCTGTA  
TTTGCAATTATAGCCGGAATTGTCCAATGATTCCCATTATTTACCGGACTAACCT  
TAAATAATTTTTTTTTAAAAACCCAATTTATTACTATATTTTTAGGTGTAAATTTAAC  
ATTTTTCTCAACACTTTTTAGGGCTAAGAGGAATGCCTCGGCGATATTCGGAT  
TATCCAGATGCTTTCACTATCTGAAATGCCATTTTCATCTATTGGTTCCATTATTTT  
TCTCACAAGAATTATCTTTTTTTTTATTATCTTATGAGAAAGGCTTTCTTCCCAAC  
GTAATCTTTGAGAACTTTAAATGTAACAACCTTCAATTGAATGGTTTCAAGCCCTA  
CCCCCTAGTG

PE\_MAN\_29

CGGGCGATGTGTACATATTTTAGAGCTTTAATCATCTTAAAAAATCTAAAAAATT  
ACTCTCAAATCCAAATCAAATTTTTTAAACAAAAATTATTTTCAAATAAATTTATT  
GTAACCCATTTCTTCTTTATTATAAACTACACCTTGATCTGATTTATTTTTAATAA  
AAAATTTTAAATATTTATAATTCTATTAATAATTTAAACTACGACGATATATAAAC  
TAATAAATAAAGTGCATCTAATCGTGGACTATCGATTATAGAACAGGTTCCCTCTG  
AAAAGACTAAAATACCGCCAAATTTTTTAAATTTTCAAGAACATAACTAATACTAAT  
TAAGTAAAAAATTTACATTTTTAATAATAGGGTATCTAACAGACCTAATATCCCC  
AGCTTCTACACCAAAAATTAATTTAATCCAACATCGAGGTCGCAATCTTTATCTT  
CGATTAGAACTCTTTGATAATATTACGCTGTTATCCCTAAGGTAATTAATCTTAC  
AATTATTACTAATAGCTCAAGTATACATAAATTAATGATTTAAATTTAAAAAAGTT  
CAATTAATTTTTCAATCACCCCAATTAATAAATTAATAAATTAATAAATTTTATAC  
TaAAAAAATTAATAATTTTTAAATATGAACTCTATAGGGTCTTCTCGTCTTTTTAA  
ATTAATTTTAGCTTTTTAACTAAAAATAAATTTTTAATGTTTAAATAGAGACAGAA  
ATTTTTTATCCAACCATTCAATCCAGCTTCTAATTAAGAACTAATGATTATGCTA  
CCTTAGCACGGTCAAATACCGCGGCCATTTAATCCTCAGAGGGCAGGCTAAT  
TATTAGACAAGAAAGGGGAAAAAGAAGCTTTTGGAACCTTAGGAATAATTTAT  
GCTATAATAGCTATCGGATTATTAGGATTCGTAGTTTGAGCTCACCATATATTTAC  
AGTAGGAATAGATGTAGATACCCGAGCTTACTTCACTTCAGCAACTATAATTATT  
GCGGTTCCAACCTGGGATTAAGTCTTTAGATGACTAGCCACCTTTCATGGAACCT  
CAAATTTTAAATAGACCAGTCACCCTGTGAGCTTTAGGTTTTGTATTTTTATTTAC  
AGTAGGAGGATTAACAGGGGTAATTTAGCTAATTCTTCAATTGATATTATTCTCC  
ACGATACTTACTATGTAGTAGCTCATTTTTCACTATGTTCTTTCTATAGGAGCTGTA  
TTTGCAATTATAGCCGGAATTGTCCAATGATTCCCATTATTTACCGGACTAACCT  
TAAATAATTTTTTTTTAAAAACCCAATTTATTACTATATTTTTAGGTGTAAATTTAAC  
ATTTTTCTCAACACTTTTTAGGGCTAAGAGGAATGCCTCGGCGATATTCGGAT  
TATCCAGATGCTTTCACTATCTGAAATGCCATTTTCATCTATTGGTTCCATTATTTT  
TCTCACAAGAATTATCTTTTTTTTTATTATCTTATGAGAAAGGCTTTCTTCCCAAC  
GTAATCTTTGAGAACTTTAAATGTAACAACCTTCAATTGAATGGTTTCAAGCCCTA  
CCCCCTAGTG

PE\_MAN\_6

CGGGCGATGTGTACATATTTTAGAGCTTTAATCATCTTAAAAAATCTAAAAAATT  
ACTCTCAAATCCAAATCAAATTTTTTAAACAAAAATTATTTTCAAATAAATTTATT  
GTAACCCATTTCTTCTTTATTATAAACTACACCTTGATCTGATTTATTTTTAATAA  
AAAATTTTAAATATTTATAATTCTATTAATAATTTAAACTACGACGATATATAAAC  
TAATAAATAAAGTGCATCTAATCGTGGACTATCGATTATAGAACAGGTTCCCTCTG  
AAAAGACTAAAATACCGCCAAATTTTTTAAATTTTCAAGAACATAACTAATACTAAT  
TAAGTAAAAAATTTACATTTTTAATAATAGGGTATCTAACAGACCTAATATCCCC  
AGCTTCTACACCAAAAATTAATTTAATCCAACATCGAGGTCGCAATCTTTATCTT  
CGATTAGAACTCTTTGATAATATTACGCTGTTATCCCTAAGGTAATTAATCTTAC  
AATTATTACTAATAGCTCAAGTATACATAAATTAATGATTTAAATTTAAAAAAGTT  
CAATTAATTTTTCAATCACCCCAATTAATAAATTAATAAATTAATAAATTTTATAC

TaAAAAAAAAATTAATAATTTTTAAATATGAAACTCTATAGGGTCTTCTCGTCTTTTTAA  
ATTAATTTTAGCTTTTTAACTAAAAATAAATTTTTAATGTTTAAATAGAGACAGAA  
ATTTTTTATCCAACCATTCATTCCAGCTTCTAATTAAGAACTAATGATTATGCTA  
CCTTAGCACGGTCAAATACCGCGGCCATTTAAATCCTCAGAGGGCAGGCTAAT  
TATTAGACAAGAAAGGGGGAAAAAGAAGCTTTTGGAACCTTAGGAATAATTTAT  
GCTATAATAGCTATCGGATTATTAGGATTCGTAGTTTGAGCTCACCATATATTTAC  
AGTAGGAATAGATGTAGATACCCGAGCTTACTTCACTTCAGCAACTATAATTATT  
GCGGTTCCAACCTGGGATTAAGTCTTTAGATGACTAGCCACCTTTCATGGAACCT  
CAAATTTTAAATAGACCAGTAACCCTGTGAGCTTTAGGTTTTGTATTTTTATTTAC  
AGTAGGAGGATTAACAGGGGTAATTTAGCTAATTCTTCAATTGATATTATTCTCC  
ACGATACTTACTATGTAGTAGCTCATTTTCACTATGTTCTTTCTATAGGAGCTGTA  
TTTGCAATTATAGCCGGAATTGTCCAATGATTCCCATTATTTACCGGACTAACCT  
TAAATAATTTTTTTTTAAAAACCCAATTTATTACTATATTTTTAGGTGTAAATTTAAC  
ATTTTTTCTCAACACTTTTTAGGGCTAAGAGGAATGCCTCGGCGATATTCGGAT  
TATCCAGATGCTTTCCTATCTGAAATGCCATTTTCATCTATTGGTTCCATTATTTTC  
TCTCACAAGAATTATCTTTTTTTTTATTTATCTTATGAGAAAGGCTTTCTTCCCAAC  
GTAATCTTTGAGAACTTTAAATGTAACAACCTTCAATTGAATGGTTTCAAGCCCTA  
CCCCCTAGTG

PE\_MAN\_8

CGGGCGATGTGTACATATTTTAGAGCTTTAATCATCTTAAAAAATCTAAAAAATT  
ACTCTCAAATCAAATTCAAATTTTTTTAACAAAAATTATTTTCAAATAAATTTATT  
GTAACCCATTTCTTCTTTATTATAAACTACACCTTGATCTGATTTATTTTTAATAA  
AAAATTTTAAATATTTATAATTCTATTAATAATTTAACTACGACGATATATAAAC  
TAATAAATAAAGTGCATCTAATCGTGGACTATCGATTATAGAACAGGTTCTCTG  
AAAAGACTAAAATACCGCCAAATTTTTTAATTTTCAAGAACATAACTAATACTAAT  
TAAGTAAAAAATTTACATTTTTAATAATAGGGTATCTAACAGACCTAATATCCCC  
AGCTTCTACACCAAAAATTAATTTAATCCAACATCGAGGTCGCAATCTTTATCTT  
CGATTAGAACTCTTTGATAATATTACGCTGTTATCCCTAAGGTAATTAATCTTAC  
AATTACTAATAGCTCAAGTATACATAAATTAATGATTTAAATTTAAAAAAGTT  
CAATTAATTTTTCAATCACCCCAATTAATAATTAAAAAAATTAATAATTTTTATAC  
TaAAAAAAAAATTAATAATTTTTAAATATGAAACTCTATAGGGTCTTCTCGTCTTTTTAA  
ATTAATTTTAGCTTTTTAACTAAAAATAAATTTTTAATGTTTAAATAGAGACAGAA  
ATTTTTTATCCAACCATTCATTCCAGCTTCTAATTAAGAACTAATGATTATGCTA  
CCTTAGCACGGTCAAATACCGCGGCCATTTAAATCCTCAGAGGGCAGGCTAAT  
TATTAGACAAGAAAGGGGGAAAAAGAAGCTTTTGGAACCTTAGGAATAATTTAT  
GCTATAATAGCTATCGGATTATTAGGATTCGTAGTTTGAGCTCACCATATATTTAC  
AGTAGGAATAGATGTAGATACCCGAGCTTACTTCACTTCAGCAACTATAATTATT  
GCGGTTCCAACCTGGGATTAAGTCTTTAGATGACTAGCCACCTTTCATGGAACCT  
CAAATTTTAAATAGACCAGTAACCCTGTGAGCTTTAGGTTTTGTATTTTTATTTAC  
AGTAGGAGGATTAACAGGGGTAATTTAGCTAATTCTTCAATTGATATTATTCTCC  
ACGATACTTACTATGTAGTAGCTCATTTTCACTATGTTCTTTCTATAGGAGCTGTA  
TTTGCAATTATAGCCGGAATTGTCCAATGATTCCCATTATTTACCGGACTAACCT  
TAAATAATTTTTTTTTAAAAACCCAATTTATTACTATATTTTTAGGTGTAAATTTAAC  
ATTTTTTCTCAACACTTTTTAGGGCTAAGAGGAATGCCTCGGCGATATTCGGAT  
TATCCAGATGCTTTCCTATCTGAAATGCCATTTTCATCTATTGGTTCCATTATTTTC  
TCTCACAAGAATTATCTTTTTTTTTATTTATCTTATGAGAAAGGCTTTCTTCCCAAC  
GTAATCTTTGAGAACTTTAAATGTAACAACCTTCAATTGAATGGTTTCAAGCCCTA  
CCCCCTAGTG

pit1

CGGGCGATGTGTACATATTTTAGAGCTTTAATCATCTTAAAAAATCTAAAAAATT

ACTCTCAAATCCAAATTCAAATTTTTTTAAACAAAAATTATTTTAAAATAAATTTATT  
GTAACCCATTTCTTCTTTATTATAAACTACACCTTGATCTGATTTATTTTTTAATAA  
AAAATTTTAAATATTTATAATTCTATTAATAATTTAAACTACGACGATATATAAAC  
TAATAAATAAAGTGCATCTAATCGTGGACTATCGATTATAGAACAGGTTCCCTCTG  
AAAAGACTAAAATACCGCCAAATTTTTTAATTTTCAAGAACATAACTAATACTAAT  
TAAGTAAAAAAATTTACATTTTTTAATAATAGGGTATCTAACAGACCTAATATTTCC  
AGCTTCTGCACCAAAAATTAATTTTAATCCAACATCGAGGTCGCAATCTTTATCTT  
CGATTAGAACTCTTTGATAATATTACGCTGTTATCCCTAAGGTAATTAATCTTAC  
AATTATTACTAATAGCTCAAGTATACATAAATTAATGATTTAAATTTAAAAAAAGTT  
CGATTAATTTTTCAATCACCCCAATTAATAAATTAAAAAAATTAATAATTTTTATAC  
TaAAAAAAATTAATAATTTTTAAATATGAAACTCTATAGGGTCTTCTCGTCTTTTTAA  
ATTAATCTTAGCTTTTTAACTAAAAATAAATTTTTAATGTTTAAATAGAGACAGAA  
ATTTTTTTATCCAACCATTCATTCCAGCTTCTAATTAAGAACTAATGATTATGCTA  
CCTTAGCACGGTCAAATACCGCGGCCATTTAAATCCTCAGAGGGCAGGCTAAT  
TATTAGACAAGAAAGGGGGAAAAAAGAAGCTTTTGGAACCTTAGGAATAATTTAT  
GCCATGATAGCTATCGGATTATTAGGATTCGTAGTTTGAGCTCACCATATATTTA  
CAGTAGGGATAGATGTAGATACCCGAGCTTACTTCACTTCAGCAACTATAATTAT  
CGCGGTTCCAACCTGGGATTAAGTCTTTAGGTGACTAGCCACCTTTCATGGAAC  
TCAAATTTTAAATAGACCAGTAACCCTGTGAGCTTTAGGTTTTGTATTTTTATTTA  
CAGTAGGAGGATTAACAGGGGTAAATTTAGCTAATTCCTCAATTGATATTATTCTT  
CACGATACTTACTATGTAGTAGCTCATTTTCACTATGTTCTTTCTATAGGAGCTGT  
ATTTGCAATTATAGCCGGAATTGTCCAATGATTCCCATTATTTACTGGACTAACCT  
TAAATAATTTTTTTTTAAAAACCCAATTTATTACTATATTTTTAGGTGTAAATTTAAC  
ATTTTTTCTCAACACTTTTTAGGGCTAAGAGGAATGCCTCGGCGATATTCGGAT  
TATCCAGATGCTTTCCTATCTGAAATGCCATTTTCATCTATTGGTTCCATTATTTT  
TCTCACAAGAATTATCTTTTTTTTTATTTATCTTATGAGAAAGGCTTTCTTCCCAAC  
GTAATCTTTGAGAACTTTAAATGTAACAACCTTCAATTGAATGGTTACAAGCCCTA  
CCCCCTAGTG

pit2

CGGGCGATGTGTACATATTTTAGAGCTTTAATCATCTTAAAAAATCTAAAAAATT  
ACTCTCAAATCCAAATTCAAATTTTTTTAAACAAAAATTATTTTAAAATAAATTTATT  
GTAACCCATTTCTTCTTTATTATAAACTACACCTTGATCTGATTTATTTTTTAATAA  
AAAATTTTAAATATTTATAATTCTATTAATAATTTAAACTACGACGATATATAAAC  
TAATAAATAAAGTGCATCTAATCGTGGACTATCGATTATAGAACAGGTTCCCTCTG  
AAAAGACTAAAATACCGCCAAATTTTTTAATTTTCAAGAACATAACTAATACTAAT  
TAAGTAAAAAAATTTACATTTTTTAATAATAGGGTATCTAACAGACCTAATATTTCC  
AGCTTCTGCACCAAAAATTAATTTTAATCCAACATCGAGGTCGCAATCTTTATCTT  
CGATTAGAACTCTTTGATAATATTACGCTGTTATCCCTAAGGTAATTAATCTTAC  
AATTATTACTAATAGCTCAAGTATACATAAATTAATGATTTAAATTTAAAAAAAGTT  
CGATTAATTTTTCAATCACCCCAATTAATAAATTAAAAAAATTAATAATTTTTATAC  
TaAAAAAAATTAATAATTTTTAAATATGAAACTCTATAGGGTCTTCTCGTCTTTTTAA  
ATTAATCTTAGCTTTTTAACTAAAAATAAATTTTTAATGTTTAAATAGAGACAGAA  
ATTTTTTTATCCAACCATTCATTCCAGCTTCTAATTAAGAACTAATGATTATGCTA  
CCTTAGCACGGTCAAATACCGCGGCCATTTAAATCCTCAGAGGGCAGGCTAAT  
TATTAGACAAGAAAGGGGGAAAAAAGAAGCTTTTGGAACCTTAGGAATAATTTAT  
GCCATGATAGCTATCGGATTATTAGGATTCGTAGTTTGAGCTCACCATATATTTA  
CAGTAAGGATAGATGTAGATACCCGAGCTTACTTCACTTCAGCAACTATAATTAT  
CGCGGTTCCAACCTGGGATTAAGTCTTTAGGTGACTAGCCACCTTTCATGGAAC  
TCAAATTTTAAATAGACCAGTAACCCTGTGAGCTTTAGGTTTTGTATTTTTATTTA  
CAGTAGGAGGATTAACAGGGGTAAATTTAGCTAATTCCTCAATTGATATTATTCTT

CACGATACTTACTATGTAGTAGCTCATTTTTCACTATGTTCTTTCTATAGGAGCTGT  
ATTTGCAATTATAGCCGGAATTGTCCAATGATTCCCATTATTTACTGGACTAACCT  
TAAATAATTTTTTTTTAAAAACCCAATTTATTACTATATTTTTAGGTGTAAATTTAAC  
ATTTTTCTCAACACTTTTTAGGGCTAAGAGGAATGCCTCGGCGATATTCGGAT  
TATCCAGATGCTTTCACTATCTGAAATGCCATTTTCATCTATTGGTTCCATTATTTCT  
TCTCACAAGAATTATCTTTTTTTTTATTTATCTTATGAGAAAGGCTTTCTTCCCAAC  
GTAATCTTTGAGAACTTTAAATGTAACAACCTTCAATTGAATGGTTACAAGCCCTA  
CCCCCTAGTG

pit4

CGGGCGATGTGTACATATTTTAGAGCTTTAATCATCTTAAAAAATCTAAAAAATT  
ACTCTCAAATCCAAATCAAATTTTTTAAACAAAAATTATTTTAAAATAAATTTATT  
GTAACCCATTTCTTCTTTATTATAAACTACACCTTGATCTGATTTATTTTTAATAA  
AAAATTTTAAATATTTATAATTCTATTAATAATTTAAACTACGACGATATATAAAC  
TAATAAATAAAGTGCATCTAATCGTGGACTATCGATTATAGAACAGGTTCCCTCTG  
AAAAGACTAAAATACCGCCAAATTTTTAATTTTCAAGAACATAACTAATACTAAT  
TAAGTAAAAAATTTACATTTTTAATAATAGGGTATCTAACAGACCTAATATTTCC  
AGCTTCTGCACCAAAAATTAATTTAATCCAACATCGAGGTCGCAATCTTTATCTT  
CGATTAGAACTCTTTGATAATATTACGCTGTTATCCCTAAGGTAATTAATCTTAC  
AATTATTACTAATAGCTCAAGTATACATAAATTAATGATTTAAATTTAAAAAAGTT  
CGATTAATTTTTCAATCACCCCAATTAATAAATTAATAAATTTAAAAATTTTATAC  
TaAAAAAATTAATAATTTTTAAATATGAACTCTATAGGGTCTTCTCGTCTTTTTAA  
ATTAATCTTAGCTTTTTAACTAAAAATAAATTTTTAATGTTTAAATAGAGACAGAA  
ATTTTTTATCCAACCATTCAATCCAGCTTCTAATTAAGAACTAATGATTATGCTA  
CCTTAGCACGGTCAAATACCGCGGCCATTTAATCCTCAGAGGGCAGGCTAAT  
TATTAGACAAGAAAGGGGAAAAAGAAGCTTTTGGAACCTTAGGAATAATTTAT  
GCCATGATAGCTATCGGATTATTAGGATTCGTAGTTTGAGCTCACCATATATTTA  
CAGTAGGGATAGATGTAGATACCCGAGCTTACTTCACTTCAGCAACTATAATTAT  
TGCGGTTCCAACCTGGGATTAAGTCTTTAGATGACTAGCCACCTTTTCATGGAAC  
CAAATTTTAAATAGACCAGTAACCCTGTGAGCTTTAGGTTTTGTATTTTTATTTAC  
AGTAGGAGGATTAACAGGGGTAATTTAGCTAATTCTTCAATTGATATTATTCTTC  
ACGATACTTACTATGTAGTAGCTCATTTTTCACTATGTTCTTTCTATAGGAGCTGTA  
TTTGCAATTATAGCCGGAATTGTCCAATGATTCCCATTATTTACTGGACTAACCTT  
AAATAATTTTTTTTTAAAAACCCAATTTATTACTATATTTTTAGGTGTAAATTTAACA  
TTTTTTCTCAACACTTTTTAGGGCTAAGAGGAATGCCTCGGCGATATTCGGATT  
ATCCAGATGCTTTCACTATCTGAAATGCCATTTTCATCTATTGGTTCCATTATTTCT  
CTCACAAGAATTATCTTTTTTTTTATTTATCTTATGAGAAAGGCTTTCTTCCCAACG  
TAAATCTTTGAGAACTTTAAATGTAACAACCTTCAATTGAATGGTTACAAGCCCTAC  
CCCCTAGTG

ron3

CGGGCGATGTGTACATATTTTAGAGCTTTAATCATCTTAAAAAATCTAAAAAATT  
ACTCTCAAATCCAAATCAAATTTTTTAAACAAAAATTATTTTAAAATAAATTTATT  
GTAACCCATTTCTTCTTTATTATAAACTACACCTTGATCTGATTTATTTTTAATAA  
AAAATTTTAAATATTTATAATTCTATTAATAATTTAAACTACGACGATATATAAAC  
TAATAAATAAAGTGCATCTAATCGTGGACTATCGATTATAGAACAGGTTCCCTCTG  
AAAAGACTAAAATACCGCCAAATTTTTAATTTTCAAGAACATAACTAATACTAAT  
TAAGTAAAAAATTTACATTTTTAATAATAGGGTATCTAACAGACCTAATATTTCC  
AGCTTCTGCACCAAAAATTAATTTAATCCAACATCGAGGTCGCAATCTTTATCTT  
CGATTAGAACTCTTTGATAATATTACGCTGTTATCCCTAAGGTAATTAATCTTAC  
AATTATTACTAATAGCTCAAGTATACATAAATTAATGATTTAAATTTAAAAAAGTT  
CAATTAATTTTTCAATCACCCCAATTAATAAATTAATAAATTTAAAAATTTTATAC



TaAAAAAAAAATTAATAATTTTTAAATATGAAACTCTATAGGGTCTTCTCGTCTTTTTAA  
ATTAATTTTAGCTTTTTAACTAAAAATAAATTTTTAATGTTTAAATAGAGACAGAA  
ATTTTTTATCCAACCATTCATTCCAGCTTCTAATTAAGAACTAATGATTATGCTA  
CCTTAGCACGGTCAAATACCGCGGCCATTTAAATCCTCAGAGGGCAGGCTAAT  
TATTAGACAAGAAAGGGGGAAAAAGAAGCTTTTGGAACCTTAGGAATAATTTAT  
GCCATGATAGCTATCGGATTATTAGGATTCGTAGTTTGAGCTCACCATATATTTA  
CAGTAGGGATAGATGTAGATACCCGAGCTTACTTCACTTCAGCAACTATAATTAT  
TGCGGTTCCAACCTGGGATTAAGTCTTTAGATGACTAGCCACCTTTCATGGAAC  
CAAATTTTAAATAGACCAGTAACCCTGTGAGCTTTAGGTTTTGTATTTTTATTTAC  
AGTAGGAGGATTAACAGGGGTAATTTAGCTAATTCTTCAATTGATATTATTCTTC  
ACGATACTTACTATGTAGTAGCTCATTTTCACTATGTTCTTTCTATAGGAGCTGTA  
TTTGCAATTATAGCCGGAATTGTCCAATGATTCCCATTATTTACCGGACTAACCT  
TAAATAATTTTTTTTTAAAAACCCAATTTATTACTATATTTTTAGGTGTAAATTTAAC  
ATTTTTTCCCAACACTTTTTAGGGCTAAGAGGAATGCCTCGGCGATATTTCGGAT  
TATCCAGATGCTTTCCTATCTGAAATGCCATTTTCATCTATTGGTTCCATTATTTTC  
TCTCACAAGAATTATCTTTTTTTTTATTTATCTTATGAGAAAGGCTTTCTTCCCAAC  
GTAATCTTTGAGAACTTTAAATGTAACAACCTTCAATTGAATGGTTACAAGCCCTA  
CCCCCTAGTG

sob1

CGGGCGATGTGTACATATTTTAGAGCTTTAATCATCTTAAAAAATCTAAAAAATT  
ACTCTCAAATCAAATTCAAATTTTTTAAACAAAAATTATTTTAAAATAAATTTATT  
GTAACCCATTTCTTCTTTATTATAAACTACACCTTGATCTGATTTATTTTTAATAA  
AAAATTTTAAATATTTATAATTCTATTAATAATTTAACTACGACGATATATAAAC  
TAATAAATAAAGTGCATCTAATCGTGGACTATCGATTATAGAACAGGTTCTCTG  
AAAAGACTAAAATACCGCCAAATTTTTAATTTTCAAGAACATAACTAATACTAAT  
TAAGTAAAAAATTTACATTTTTAATAATAGGGTATCTAACAGACCTAATATTTCC  
AGCTTCTGCACCAAAAATTAATTTAATCCAACATCGAGGTCGCAATCTTTATCTT  
CGATTAGAACTCTTTGATAATATTACGCTGTTATCCCTAAGGTAATTAATCTTAC  
AATTACTAATAGCTCAAGTATACATAAATTAATGATTTAAATTTAAAAAAGTT  
CGATTAATTTTTCAATCACCCCAATTAATAATTAAAAAAATTAATAATTTTTATAC  
TaAAAAAAAAATTAATAATTTTTAAATATGAAACTCTATAGGGTCTTCTCGTCTTTTTAA  
ATTAATCTTAGCTTTTTAACTAAAAATAAATTTTTAATGTTTAAATAGAGACAGAA  
ATTTTTTATCCAACCATTCATTCCAGCTTCTAATTAAGAACTAATGATTATGCTA  
CCTTAGCACGGTCAAATACCGCGGCCATTTAAATCCTCAGAGGGCAGGCTAAT  
TATTAGACAAGAAAGGGGGAAAAAGAAGCTTTTGGAACCTTAGGAATAATTTAT  
GCCATGATAGCTATCGGATTATTAGGATTCGTAGTTTGAGCTCACCATATATTTA  
CAGTAGGGATAGATGTAGATACCCGAGCTTACTTCACTTCAGCAACTATAATTAT  
TGCGGTTCCAACCTGGGATTAAGTCTTTAGATGACTAGCCACCTTTCATGGAAC  
CAAATTTTAAATAGACCAGTAACCCTGTGAGCTTTAGGTTTTGTATTTTTATTTAC  
AGTAGGAGGATTAACAGGGGTAATTTAGCTAATTCTTCAATTGATATTATTCTTC  
ACGATACTTACTATGTAGTAGCTCATTTTCACTATGTTCTTTCTATAGGAGCTGTA  
TTTGCAATTATAGCCGGAATTGTCCAATGATTCCCATTATTTACCGGACTAACCT  
TAAATAATTTTTTTTTAAAAACCCAATTTATTACTATATTTTTAGGTGTAAATTTAAC  
ATTTTTTCCCAACACTTTTTAGGGCTAAGAGGAATGCCTCGGCGATATTTCGGAT  
TATCCAGATGCTTTCCTATCTGAAATGCCATTTTCATCTATTGGTTCCATTATTTTC  
TCTCACAAGAATTATCTTTTTTTTTATTTATCTTATGAGAAAGGCTTTCTTCCCAAC  
GTAATCTTTGAGAACTTTAAATGTAACAACCTTCAATTGAATGGTTACAAGCCCTA  
CCCCCTAGTG

SPA\_PRA\_1

CGGGCGATGTGTACATATTTTAGAGCTTTAATCATCTTAAAAAATCTAAAAAATT

ACTCTCAAATCCAAATTCAAATTTTTTTAAACAAAAATTATTTTAAAATAAATTTATT  
GTAACCCATTTCTTCTTTATTATAAACTACACCTTGATCTGATTTATTTTTTAATAA  
AAAATTTTAAATATTTATAATTCTATTAATAATTTAACTACGACGATATATAAAC  
TAATAAATAAAGTGCATCTAATCGTGGACTATCGATTATAGAACAGGTTCCCTCTG  
AAAAGACTAAAATACCGCCAAATTTTTTAATTTTCAAGAACATAACTAATACTAAT  
TAAGTAAAAAAATTTACATTTTTTAATAATAGGGTATCTAACAGACCTAATATTTCC  
AGCTTCTGCACCAAAAATTAATTTAATCCAACATCGAGGTCGCAATCTTTATCTT  
CGATTAGAACTCTTTGATAATATTACGCTGTTATCCCTAAGGTAATTAATCTTAC  
AATTATTACTAATAGCTCAAGTATACATAAATTAATGATTTAAATTTAAAAAAAGTT  
CAATTAATTTTTCAATCACCCCAATTAATAAATTAAAAAAATTAATAATTTTTATAC  
TaAAAAAAATTAATAATTTTTAAATATGAACTCTATAGGGTCTTCTCGTCTTTTTAA  
ATTAATTTTAGCTTTTTAACTAAAAATAAATTTTTAATGTTTAAATAGAGACAGAA  
ATTTTTTATCCAACCATTCATTCCAGCTTCTAATTAAGAACTAATGATTATGCTA  
CCTTAGCACGGTCAAATACCGCGGCCATTTAAATCCTCAGAGGGCAGGCTAAT  
TATTAGACAAGAAAGGGGGAAAAAAGAAGCTTTTGGAACCTTAGGAATAATTTAT  
GCCATGATAGCTATCGGATTATTAGGATTCGTAGTTTGAGCTCACCATATATTTA  
CAGTAGGGATAGATGTAGATACCCGAGCTTACTTCACTTCAGCAACTATAATTAT  
TGCGGTTCCAACCTGGGATTAAGTCTTTAGATGACTAGCCACCTTTCATGGAAC  
CAAATTTTAAATAGACCAGTAACCCTGTGAGCTTTAGGTTTTGTATTTTTATTTAC  
AGTAGGAGGATTAACAGGGGTAATTTAGCTAATTCTTCAATTGATATTATTCTTC  
ACGATACTTACTATGTAGTAGCTCATTTTCACTATGTTCTTTCTATAGGAGCTGTA  
TTTGCAATTATAGCCGGAATTGTCCAATGATTCCCATTTTACCGGACTAACCT  
TAAATAATTTTTTTTTAAAAACCCAATTTATTACTATTTTTTAGGTGTAAATTTAAC  
ATTTTTTCCCCAACACTTTTTAGGGCTAAGAGGAATGCCTCGGCGATATTCGGAT  
TATCCAGATGCTTTCCTATCTGAAATGCCATTTTCATCTATTGGTTCCATTATTTT  
TCTCACAAGAATTATCTTTTTTTTTATTTATCTTATGAGAAAGGCTTTCTTCCCAAC  
GTAATCTTTGAGAACTTTAAATGTAACAACCTTCAATTGAATGGTTACAAGCCCTA  
CCCCCTAGTG

SWI\_NEU\_1

CGGGCGATGTGTACATATTTTAGAGCTTTAATCATCTTAAAAAATCTAAAAAATT  
ACTCTCAAATCCAAATTCAAATTTTTTTAAACAAAAATTATTTTAAAATAAATTTATT  
GTAACCCATTTCTTCTTTATTATAAACTACACCTTGATCTGATTTATTTTTTAATAA  
AAAATTTTAAATATTTATAATTCTATTAATAATTTAACTACGACGATATATAAAC  
TAATAAATAAAGTGCATCTAATCGTGGACTATCGATTATAGAACAGGTTCCCTCTG  
AAAAGACTAAAATACCGCCAAATTTTTTAATTTTCAAGAACATAACTAATACTAAT  
TAAGTAAAAAAATTTACATTTTTTAATAATAGGGTATCTAACAGACCTAATATTTCC  
AGCTTCTGCACCAAAAATTAATTTAATCCAACATCGAGGTCGCAATCTTTATCTT  
CGATTAGAACTCTTTGATAATATTACGCTGTTATCCCTAAGGTAATTAATCTTAC  
AATTATTACTAATAGCTCAAGTATACATAAATTAATGATTTAAATTTAAAAAAAGTT  
CGATTAATTTTTCAATCACCCCAATTAATAAATTAAAAAAATTAATAATTTTTATAC  
TaAAAAAAATTAATAATTTTTAAATATGAACTCTATAGGGTCTTCTCGTCTTTTTAA  
ATTAATCTTAGCTTTTTAACTAAAAATAAATTTTTAATGTTTAAATAGAGACAGAA  
ATTTTTTATCCAACCATTCATTCCAGCTTCTAATTAAGAACTAATGATTATGCTA  
CCTTAGCACGGTCAAATACCGCGGCCATTTAAATCCTCAGAGGGCAGGCTAAT  
TATTAGACAAGAAAGGGGGAAAAAAGAAGCTTTTGGAACCTTAGGAATAATTTAT  
GCCATGATAGCTATCGGATTATTAGGATTCGTAGTTTGAGCTCACCATATATTTA  
CAGTAGGGATAGATGTAGATACCCGAGCTTACTTCACTTCAGCAACTATGATTAT  
CGCGGTTCCAACCTGGGATTAAGTCTTTAGGTGGCTAGCCACCTTTCATGGAAC  
TCAAATTTTAAATAGACCAGTAACCCTGTGAGCTTTAGGTTTTGTATTTTTATTTA  
CAGTAGGAGGATTAACAGGGGTAATTTAGCTAATTCTTCAATTGATATTATTCTT

CACGATACTTACTATGTAGTAGCTCATTTTTCACTATGTTCTTTCTATAGGAGCTGT  
ATTTGCAATTATAGCCGGAATTGTCCAATGATTCCCATTATTTACTGGACTAACCT  
TAAATAATTTTTTTTTAAAAACCCAATTTATTACTATATTTTTAGGTGTAAATTTAAC  
ATTTTTTCTCAACACTTTTTAGGGCTAAGAGGAATGCCTCGGCGATATTCGGAT  
TATCCAGATGCTTTCACTATCTGAAATGCCATTTTCATCTATTGGTTCCATTATTTT  
TCTCACAAGAATTATCTTTTTTTTTATTATCTTATGAGAAAGGCTTTCTTCCCAAC  
GTAATCTTTGAGAACTTTAAATGTAACAACCTTCAATTGAATGGTTACAAGCCCTA  
CCCCCTAGTG

tol1

CGGGCGATGTGTACATATTTTAGAGCTTTAATCATCTTAAAAAATCTAAAAAATT  
ACTCTCAAATCCAAATTCAAATTTTTTAAACAAAAATTATTTTAAAATAAATTTATT  
GTAACCCATTTCTTCTTTATTATAAACTACACCTTGATCTGATTTATTTTTAATAA  
AAAATTTTAAATATTTATAATTCTATTAATAATTTAACTACGACGATATATAAAC  
TAATAAATAAAGTGCATCTAATCGTGGACTATCGATTATAGAACAGGTTCCCTCTG  
AAAAGACTAAAATACCGCCAAATTTTTAATTTTCAAGAACATAACTAATACTAAT  
TAAGTAAAAAATTTACATTTTTAATAATAGGGTATCTAACAGACCTAATATTTCC  
AGCTTCTGCACCAAAAATTAATTTAATCCAACATCGAGGTCGCAATCTTTATCTT  
CGATTAGAACTCTTTGATAATATTACGCTGTTATCCCTAAGGTAATTAATCTTAC  
AATTACTAATAGCTCAAGTATACATAAATTAATGATTTAAATTTAAAAAAGTT  
CAATTAATTTTCAATCACCCCAATTAATAATTAAAAAAATTAATAATTTTATAC  
TaAAAAAATTAATAATTTTTAAATATGAACTCTATAGGGTCTTCTCGTCTTTTTAA  
ATTAATTTAGCTTTTTAACTAAAAATAAATTTTTAATGTTTAAATAGAGACAGAA  
ATTTTTTATCCAACCATTCAATCCAGCTTCTAATTAAGAACTAATGATTATGCTA  
CCTTAGCACGGTCAAATACCGCGGCCATTTAATCCTCAGAGGGCAGGCTAAT  
TATTAGACAAGAAAGGGGAAAAAGAAGCTTTTGGAGCCTTAGGAATAATTTAT  
GCCATGATAGCTATCGGATTATTAGGATTCGTAGTTTGGAGCTCACCATATATTTA  
CAGTAGGGATAGATGTAGATACCCGAGCTTACTTCACTTCAGCAACTATAATTAT  
TGCGGTTCCAACCTGGGATTAAGTCTTTAGATGACTAGCCACCTTTTCATGGAAC  
CAAATTTTAAATAGACCAGTAACCCTGTGAGCTTTAGGTTTTGTATTTTTATTAC  
AGTAGGAGGATTAACAGGGGTAATTTAGCTAATTCTTCAATTGATATTATTCTTC  
ACGATACTTACTATGTAGTAGCTCATTTTTCACTATGTTCTTTCTATAGGAGCTGTA  
TTTGCAATTATAGCCGGAATTGTCCAATGATTCCCATTATTTACCGGACTAACCT  
TAAATAATTTTTTTTTAAAAACCCAATTTATTACTATATTTTTAGGTGTAAATTTAAC  
ATTTTTTCCCAACACTTTTTAGGGCTAAGAGGAATGCCTCGGCGATATTCGGAT  
TATCCAGATGCTTTCACTATCTGAAATGCCATTTTCATCTATTGGTTCCATTATTTT  
TCTCACAAGAATTATCTTTTTTTTTATTATCTTATGAGAAAGGCTTTCTTCCCAAC  
GTAATCTTTGAGAACTTTAAATGTAACAACCTTCAATTGAATGGTTACAAGCCCTA  
CCCCCTAGTG

[12s

CGGGCGATGTGTACATATTTTAGAGCTTTAATCATCTTAAAAAATCTAAAAAATT  
ACTCTCAAATCCAAATTCAAATTTTTTAAACAAAAATTATTTTCAAATAAATTTATT  
GTAACCCATTTCTTCTTTATTATAAACTACACCTTGATCTGATTTATTTTTAATAA  
AAAATTTTAAATATTTATAATTCTATTAATAATTTAACTACGACGATATATAAAC  
TAATAAATAAAGTGCATCTAATCGTGGACTATCGATTATAGAACAGGTTCCCTCTG  
AAAAGACTAAAATACCGCCAAATTTTTAATTTTCAAGAACATAACTAATACTAAT  
TAAGTAAAAAATTTACATTTTTAATAATAGGGTATCTAA]

[16s

CAGACCTAATATTTCCAGCTTCTGCACCAAAAATTAATTTAATCCAACATCGAG  
GTCGCAATCTTTATCTTCGATTAGAACTCTTTGATAATATTACGCTGTTATCCCTA  
AGGTAATTAATCTTACAATTACTAATAGCTCAAGTATACATAAATTAATGATT

```
TAAATTTAAAAAAGTTTCGATTAATTTTTCAATCACCCCAATTAATAATTAAAAAA
ATTAATAATTTTTATACTaAAAAAATTAATAATTTTTAAATATGAAACTCTATAGG
GTCTTCTCGTCTTTTAAATTAATCTTAGCTTTTTAACTAAAAAATAAATTTTTAATG
TTTAAATAGAGACAGAAATTTTTTATCCAACCATTCCAGCTTCTAATTAAG
AACTAATGATTATGCTACCTTAGCACGGTCAAATACCGCGGCCATTTAAATCC
TCAGAGGGCAGGCTA]
```

```
[CO1
```

```
ATTATTAGACAAGAAAGGGGGAAAAAAGAAGCTTTTTGGAACCTTAGGAATAATTT
ATGCCATGATAGCTATCGGATTATTAGGATTCGTAGTTTGAGCTCACCATATATT
TACAGTAGGGATAGATGTAGATACCCGAGCTTACTTCACTTCAGCAACTATAATT
ATTGCGGTTCCAACCTGGGATTAAGTCTTTAGATGACTAGCCACCTTTCATGGAA
CTCAAATTTTAAATAGACCAGTAACCCTGTGAGCTTTAGGTTTTGTATTTTTATTT
ACAGTAGGAGGATTAACAGGGGTAATTTTAGCTAATTCTTCAATTGATATTATTCT
TCACGATACTTACTATGTAGTAGCTCATTTTTCACTATGTTCTTTCTATAGGAGCTG
TATTTGCAATTATAGCCGGAATTGTCCAATGATTCCCATTATTTACCGGACTAAC
CTTAAATAATTTTTTTTTTAAAAACCCAATTTATTACTATATTTTTAGGTGTAAATTTA
ACATTTTTTCCCAACACTTTTTAGGGCTAAGAGGAATGCCTCGGCGATATTCGG
ATTATCCAGATGCTTTCCTATCTGAAATGCCATTTTCATCTATTGGTTCCATTATT
TCTCTACAAGAATTATCTTTTTTTATTTATCTTATGAGAAAGGCTTCTTCCCAA
CGTAAATCTTTGAGAACTTTAAATGTAACAACCTTCAATTGAATGGTTACAAGCCCT
ACCCCTAGTG]
```

```
;
```

```
endblock;
```

```
BEGIN MRBAYES;
```

```
charset 12S = 1-378;
charset 16S = 379-843;
charset CO1 = 844-1579;
partition favored = 3: 12S, 16S, CO1;
set partition = favored;
```

```
lset applyto=(1) nst=1 rates=equal;
lset applyto=(2) nst=2 rates=equal;
lset applyto=(3) nst=2 rates=propinv;
unlink statefreq=(all) revmat=(all) pinvar=(all);
prset applyto=(all) ratepr=variable;
mcmc ngen=1000000 samplefreq=1000 printfreq=1000 diagnfreq=10000;
```

```
END;
```

**datasetS5**

#NEXUS

begin data;  
dimensions ntax=191 nchar=732;  
format datatype=dna gap=- interleave=no;  
matrix

AFR10

ATTATTAGACAAGAAAGGGGGGAAAAAAGAAGCTTTTGGACCTTAGGAATAATTTA  
TGCCATGATAGCTATCGGATTATTAGGATTCGTAGTTTGAGCTCACCATATATTT  
ACAGTAGATAGATGTAGATACCCGAGCTTACTTCACTTCAGCAACTATAATTATT  
GCGGTTCCAACCTGGGATTAAGTCTTTAGATGACTAGCCACCTTTCATGGAACCT  
CAAATTTTAAATAGACCAGTAACCCTGTGAGCTTTAGGTTTTGTATTTTTATTTAC  
AGTAGGAGGATTAACAGGGGTAATTTTAGCTAATTCTTCAATTGATATTATTCTTC  
ACGATACTTACTATGTAGTAGCTCATTTTCACTATGTTCTTTCTATAGGAGCTGTA  
TTTGCAATTATAGCCGGAATTGTCCAATGATTCCCATTATTTACCGGACTAACCT  
TAAATAATTTTTTTTTTAAAAACCCAATTTATTACTATATTTTTAGGTGTAAATTTAAC  
ATTTTTTCCCAACACTTTTTAGGGCTAAGAGGAATGCCTCGGCGATATTCGGAT  
TATCCAGATGCTTTCCTATCTGAAATGCCATTTTCATCTATTGGTTCCATTATTTTC  
TCTCACAAGAATTATCTTTTTTTTTATTTATCTTATGAGAAAGGCTTTCTTCCCAAC  
GTAATCTTTGAGAACTTTAAATGTAACAACCTTCAATTGAATGGTTCAAGCCCTAC  
CCCCTAGTG

AFR11

ATTATTAGACAAGAAAGGGGGGAAAAAAGAAGCTTTTGGACCTTAGGAATAATTTA  
TGCCATGATAGCTATCGGATTATTAGGATTCGTAGTTTGAGCTCACCATATATTT  
ACAGTAGATAGATGTAGATACCCGAGCTTACTTCACTTCAGCAACTATAATTATT  
GCGGTTCCAACCTGGGATTAAGTCTTTAGATGACTAGCCACCTTTCATGGAACCT  
CAAATTTTAAATAGACCAGTAACCCTGTGAGCTTTAGGTTTTGTATTTTTATTTAC  
AGTAGGAGGATTAACAGGGGTAATTTTAGCTAATTCTTCAATTGATATTATTCTTC  
ACGATACTTACTATGTAGTAGCTCATTTTCACTATGTTCTTTCTATAGGAGCTGTA  
TTTGCAATTATAGCCGGAATTGTCCAATGATTCCCATTATTTACCGGACTAACCT  
TAAATAATTTTTTTTTTAAAAACCCAATTTATTACTATATTTTTAGGTGTAAATTTAAC  
ATTTTTTCCCAACACTTTTTAGGGCTAAGAGGAATGCCTCGGCGATATTCGGAT  
TATCCAGATGCTTTCCTATCTGAAATGCCATTTTCATCTATTGGTTCCATTATTTTC  
TCTCACAAGAATTATCTTTTTTTTTATTTATCTTATGAGAAAGGCTTTCTTCCCAAC  
GTAATCTTTGAGAACTTTAAATGTAACAACCTTCAATTGAATGGTTCAAGCCCTAC  
CCCCTAGTG

AFR12

ATTATTAGACAAGAAAGGGGGGAAAAAAGAAGCTTTTGGACCTTAGGAATAATTTA  
TGCCATGATAGCTATCGGATTATTAGGATTCGTAGTTTGAGCTCACCATATATTT  
ACAGTAGATAGATGTAGATACCCGAGCTTACTTCACTTCAGCAACTATAATTATT  
GCGGTTCCAACCTGGGATTAAGTCTTTAGATGACTAGCCACCTTTCATGGAACCT  
CAAATTTTAAATAGACCAGTAACCCTGTGAGCTTTAGGTTTTGTATTTTTATTTAC  
AGTAGGAGGATTAACAGGGGTAATTTTAGCTAATTCTTCAATTGATATTATTCTTC  
ACGATACTTACTATGTAGTAGCTCATTTTCACTATGTTCTTTCTATAGGAGCTGTA  
TTTGCAATTATAGCCGGAATTGTCCAATGATTCCCATTATTTACCGGACTAACCT  
TAAATAATTTTTTTTTTAAAAACCCAATTTATTACTATATTTTTAGGTGTAAATTTAAC  
ATTTTTTCCCAACACTTTTTAGGGCTAAGAGGAATGCCTCGGCGATATTCGGAT  
TATCCAGATGCTTTCCTATCTGAAATGCCATTTTCATCTATTGGTTCCATTATTTTC

TCTCACAAGAATTATCTTTTTTTTTATTTATCTTATGAGAAAGGCTTTCTTCCCAAC  
GTAATCTTTGAGAACTTTAAATGTAACAACCTTCAATTGAATGGTTCAAGCCCTAC  
CCCCTAGTG

AFR18

ATTATTAGACAAGAAAGGGGGGAAAAAAGAAGCTTTTGGACCTTAGGAATAATTTA  
TGCCATGATAGCTATCGGATTATTAGGATTCGTAGTTTGAGCTCACCATATATTT  
ACAGTAGATAGATGTAGATACCCGAGCTTACTTCACTTCAGCAACTATAATTATT  
GCGGTTCCAACCTGGGATTAAGTCTTTAGATGACTAGCCACCTTTTCATGGAAC  
CAAATTTTAAATAGACCAGTAACCCTGTGAGCTTTAGGTTTTGTATTTTTATTTAC  
AGTAGGAGGATTAACAGGGGTAATTTAGCTAATTCTTCAATTGATATTATTCTTC  
ACGATACTTACTATGTAGTAGCTCATTTTCACTATGTTCTTTCTATAGGAGCTGTA  
TTTGCAATTATAGCCGGAATTGTCCAATGATTCCCATTATTTACCGGACTAACCT  
TAAATAATTTTTTTTTAAAAACCCAATTTATTACTATATTTTTAGGTGTAAATTTAAC  
ATTTTTTCCCAACACTTTTTAGGGCTAAGAGGAATGCCTCGGCGATATTTCGGAT  
TATCCAGATGCTTTCACTATCTGAAATGCCATTTTCATCTATTGGTTCCATTATTT  
TCTCACAAGAATTATCTTTTTTTTTATTTATCTTATGAGAAAGGCTTTCTTCCCAAC  
GTAATCTTTGAGAACTTTAAATGTAACAACCTTCAATTGAATGGTTCAAGCCCTAC  
CCCCTAGTG

afr19

ATTATTAGACAAGAAAGGGGGGAAAAAAGAAGCTTTTGGACCTTAGGAATAATTTA  
TGCCATGATAGCTATCGGATTATTAGGATTCGTAGTTTGAGCTCACCATATATTT  
ACAGTAGATAGATGTAGATACCCGAGCTTACTTCACTTCAGCAACTATAATTATT  
GCGGTTCCAACCTGGGATTAAGTCTTTAGATGACTAGCCACCTTTTCATGGAAC  
CAAATTTTAAATAGACCAGTAACCCTGTGAGCTTTAGGTTTTGTATTTTTATTTAC  
AGTAGGAGGATTAACAGGGGTAATTTAGCTAATTCTTCAATTGATATTATTCTTC  
ACGATACTTACTATGTAGTAGCTCATTTTCACTATGTTCTTTCTATAGGAGCTGTA  
TTTGCAATTATAGCCGGAATTGTCCAATGATTCCCATTATTTACCGGACTAACCT  
TAAATAATTTTTTTTTAAAAACCCAATTTATTACTATATTTTTAGGTGTAAATTTAAC  
ATTTTTTCCCAACACTTTTTAGGGCTAAGAGGAATGCCTCGGCGATATTTCGGAT  
TATCCAGATGCTTTCACTATCTGAAATGCCATTTTCATCTATTGGTTCCATTATTT  
TCTCACAAGAATTATCTTTTTTTTTATTTATCTTATGAGAAAGGCTTTCTTCCCAAC  
GTAATCTTTGAGAACTTTAAATGTAACAACCTTCAATTGAATGGTTCAAGCCCTAC  
CCCCTAGTG

AFR2

ATTATTAGACAAGAAAGGGGGGAAAAAAGAAGCTTTTGGACCTTAGGAATAATTTA  
TGCCATGATAGCTATCGGATTATTAGGATTCGTAGTTTGAGCTCACCATATATTT  
ACAGTAGATAGATGTAGATACCCGAGCTTACTTCACTTCAGCAACTATAATTATT  
GCGGTTCCAACCTGGGATTAAGTCTTTAGATGACTAGCCACCTTTTCATGGAAC  
CAAATTTTAAATAGACCAGTAACCCTGTGAGCTTTAGGTTTTGTATTTTTATTTAC  
AGTAGGAGGATTAACAGGGGTAATTTAGCTAATTCTTCAATTGATATTATTCTTC  
ACGATACTTACTATGTAGTAGCTCATTTTCACTATGTTCTTTCTATAGGAGCTGTA  
TTTGCAATTATAGCCGGAATTGTCCAATGATTCCCATTATTTACCGGACTAACCT  
TAAATAATTTTTTTTTAAAAACCCAATTTATTACTATATTTTTAGGTGTAAATTTAAC  
ATTTTTTCCCAACACTTTTTAGGGCTAAGAGGAATGCCTCGGCGATATTTCGGAT  
TATCCAGATGCTTTCACTATCTGAAATGCCATTTTCATCTATTGGTTCCATTATTT  
TCTCACAAGAATTATCTTTTTTTTTATTTATCTTATGAGAAAGGCTTTCTTCCCAAC  
GTAATCTTTGAGAACTTTAAATGTAACAACCTTCAATTGAATGGTTCAAGCCCTAC  
CCCCTAGTG

AFR3

ATTATTAGACAAGAAAGGGGGGAAAAAAGAAGCTTTTGGACCTTAGGAATAATTTA

TGCCATGATAGCTATCGGATTATTAGGATTCGTAGTTTGAGCTCACCATATATTT  
ACAGTAGATAGATGTAGATACCCGAGCTTACTTCACTTCAGCAACTATAATTATT  
GCGGTTCCAACACTGGGATTAAGTCTTTAGATGACTAGCCACCTTTCATGGAAC  
CAAATTTTAAATAGACCAGTAACCCTGTGAGCTTTAGGTTTTGTATTTTTATTTAC  
AGTAGGAGGATTAACAGGGGTAATTTAGCTAATTCTTCAATTGATATTATTCTTC  
ACGATACTTACTATGTAGTAGCTCATTTTCACTATGTTCTTTCTATAGGAGCTGTA  
TTTGCAATTATAGCCGGAATTGTCCAATGATTCCCATTTTACCGGACTAACCT  
TAAATAATTTTTTTTTTAAAAACCCAATTTATTACTATATTTTTAGGTGTAAATTTAAC  
ATTTTTTCCCAACACTTTTTAGGGCTAAGAGGAATGCCTCGGCGATATTTCGGAT  
TATCCAGATGCTTTCCTATCTGAAATGCCATTTTCACTATTGGTTCCATTATTTCT  
TCTCACAAGAATTATCTTTTTTTTTATTTATCTTATGAGAAAGGCTTTCTTCCCAAC  
GTAATCTTTGAGAACTTTAAATGTAACAACCTTCAATTGAATGGTTCAAGCCCTAC  
CCCCTAGTG

AFR5

ATTATTAGACAAGAAAGGGGGGAAAAAAGAAGCTTTTGGACCTTAGGAATAATTTA  
TGCCATGATAGCTATCGGATTATTAGGATTCGTAGTTTGAGCTCACCATATATTT  
ACAGTAGATAGATGTAGATACCCGAGCTTACTTCACTTCAGCAACTATAATTATT  
GCGGTTCCAACACTGGGATTAAGTCTTTAGATGACTAGCCACCTTTCATGGAAC  
CAAATTTTAAATAGACCAGTAACCCTGTGAGCTTTAGGTTTTGTATTTTTATTTAC  
AGTAGGAGGATTAACAGGGGTAATTTAGCTAATTCTTCAATTGATATTATTCTTC  
ACGATACTTACTATGTAGTAGCTCATTTTCACTATGTTCTTTCTATAGGAGCTGTA  
TTTGCAATTATAGCCGGAATTGTCCAATGATTCCCATTTTACCGGACTAACCT  
TAAATAATTTTTTTTTTAAAAACCCAATTTATTACTATATTTTTAGGTGTAAATTTAAC  
ATTTTTTCCCAACACTTTTTAGGGCTAAGAGGAATGCCTCGGCGATATTTCGGAT  
TATCCAGATGCTTTCCTATCTGAAATGCCATTTTCACTATTGGTTCCATTATTTCT  
TCTCACAAGAATTATCTTTTTTTTTATTTATCTTATGAGAAAGGCTTTCTTCCCAAC  
GTAATCTTTGAGAACTTTAAATGTAACAACCTTCAATTGAATGGTTCAAGCCCTAC  
CCCCTAGTG

afr9

ATTATTAGACAAGAAAGGGGGGAAAAAAGAAGCTTTTGGACCTTAGGAATAATTTA  
TGCCATGATAGCTATCGGATTATTAGGATTCGTAGTTTGAGCTCACCATATATTT  
ACAGTAGATAGATGTAGATACCCGAGCTTACTTCACTTCAGCAACTATAATTATC  
GCGGTTCCAACACTGGGATTAAGTCTTTAGGTGACTAGCCACCTTTCATGGAAC  
CAAATTTTAAATAGACCAGTAACCCTGTGAGCTTTAGGTTTTGTATTTTTATTTAC  
AGTAGGAGGATTAACAGGGGTAATTTAGCTAATTCTTCAATTGATATTATTCTTC  
ACGATACTTACTATGTAGTAGCTCATTTTCACTATGTTCTTTCTATAGGAGCTGTA  
TTTGCAATTATAGCCGGAATTGTCCAATGATTCCCATTTTACTGGACTAACCTT  
AAATAATTTTTTTTTTAAAAACCCAATTTATTACTATATTTTTAGGTGTAAATTTAACA  
TTTTTTCCTCAACACTTTTTAGGGCTAAGAGGAATGCCTCGGCGATATTTCGGATT  
ATCCAGATGCTTTCCTATCTGAAATGCCATTTTCACTATTGGTTCCATTATTTCT  
CTCACAAGAATTATCTTTTTTTTTATTTATCTTATGAGAAAGGCTTTCTTCCCAACG  
TAAATCTTTGAGAACTTTAAATGTAACAACCTTCAATTGAATGGTTCAAGCCCTACC  
CCCTAGTG

AQU10

ATTATTAGACAAGAAAGGGGGGAAAAAAGAAGCTTTTGGACCTTAGGAATAATTTA  
TGCCATGATAGCTATCGGATTATTAGGATTCGTAGTTTGAGCTCACCATATATTT  
ACAGTAGATAGATGTAGATACCCGAGCTTACTTCACTTCAGCAACTATAATTATT  
GCGGTTCCAACACTGGGATTAAGTCTTTAGATGACTAGCCACCTTTCATGGAAC  
CAAATTTTAAATAGACCAGTAACCCTGTGAGCTTTAGGTTTTGTATTTTTATTTAC  
AGTAGGAGGATTAACAGGGGTAATTTAGCTAATTCTTCAATTGATATTATTCTTC

ACGATACTTACTATGTAGTAGCTCATTTTTCACTATGTTCTTTCTATAGGAGCTGTA  
TTTGCAATTATAGCCGGAATTGTCCAATGATTCCCATTATTTACCGGACTAACCT  
TAAATAATTTTTTTTTTAAAAACCCAATTTATTACTATATTTTTAGGTGTAAATTTAAC  
ATTTTTTCCCCAACACTTTTTAGGGCTAAGAGGAATGCCTCGGCGATATTCCGGAT  
TATCCAGATGCTTTCACTATCTGAAATGCCATTTTCATCTATTGGTTCCATTATTTT  
TCTCACAAGAATTATCTTTTTTTTTATTTATCTTATGAGAAAGGCTTTCTTCCCAAC  
GTAATCTTTGAGAACTTTAAATGTAACAACCTTCAATTGAATGGTTCAAGCCCTAC  
CCCCTAGTG

AQU12

ATTATTAGACAAGAAAGGGGGAAAAAAGAAGCTTTTGGACCTTAGGAATAATTTA  
TGCCATGATAGCTATCGGATTATTAGGATTCGTAGTCTGAGCTCACCATATATTT  
ACAGTAGATAGATGTAGATACCCGAGCTTACTTCACTTCAGCAACTATAATTATT  
GCGGTTCCAACCTGGGATTAAGTCTTTAGATGACTAGCCACCTTTTCATGGAACCT  
CAAATTTTAAATAGACCAGTAACCCTGTGAGCTTTAGGTTTTGTATTTTTATTTAC  
AGTAGGAGGATTAACAGGGGTAATTTTAGCTAATTCTTCAATTGATATTATTCTTC  
ACGATACTTACTATGTAGTAGCTCATTTTTCACTATGTTCTTTCTATAGGAGCTGTA  
TTTGCAATTATAGCCGGAATTGTCCAATGATTCCCATTATTTACCGGACTAACCT  
TAAATAATTTTTTTTTTAAAAACCCAATTTATTACTATATTTTTAGGTGTAAATTTAAC  
ATTTTTTCCCCAACACTTTTTAGGGCTAAGAGGAATGCCTCGGCGATATTCCGGAT  
TATCCAGATGCTTTCACTATCTGAAATGCCATTTTCATCTATTGGTTCCATTATTTT  
TCTCACAAGAATTATCTTTTTTTTTATTTATCTTATGAGAAAGGCTTTCTTCCCAAC  
GTAATCTTTGAGAACTTTAAATGTAACAACCTTCAATTGAATGGTTCAAGCCCTAC  
CCCCTAGTG

AQU13

ATTATTAGACAAGAAAGGGGGAAAAAAGAAGCTTTTGGACCTTAGGAATAATTTA  
TGCCATGATAGCTATCGGATTATTAGGATTCGTAGTTTGAGCTCACCATATATTT  
ACAGTAGATAGATGTAGATACCCGAGCTTACTTCACTTCAGCAACTATAATTATT  
GCGGTTCCAACCTGGGATTAAGTCTTTAGATGACTAGCCACCTTTTCATGGAACCT  
CAAATTTTAAATAGACCAGTAACCCTGTGAGCTTTAGGTTTTGTATTTTTATTTAC  
AGTAGGAGGATTAACAGGGGTAATTTTAGCTAATTCTTCAATTGATATTATTCTTC  
ACGATACTTACTATGTAGTAGCTCATTTTTCACTATGTTCTTTCTATAGGAGCTGTA  
TTTGCAATTATAGCCGGAATTGTCCAATGATTCCCATTATTTACCGGACTAACCT  
TAAATAATTTTTTTTTTAAAAACCCAATTTATTACTATATTTTTAGGTGTAAATTTAAC  
ATTTTTTCCCCAACACTTTTTAGGGCTAAGAGGAATGCCTCGGCGATATTCCGGAT  
TATCCAGATGCTTTCACTATCTGAAATGCCATTTTCATCTATTGGTTCCATTATTTT  
TCTCACAAGAATTATCTTTTTTTTTATTTATCTTATGAGAAAGGCTTTCTTCCCAAC  
GTAATCTTTGAGAACTTTAAATGTAACAACCTTCAATTGAATGGTTCAAGCCCTAC  
CCCCTAGTG

AQU14

ATTATTAGACAAGAAAGGGGGAAAAAAGAAGCTTTTGGACCTTAGGAATAATTTA  
TGCCATGATAGCTATCGGATTATTAGGATTCGTAGTTTGAGCTCACCATATATTT  
ACAGTAGATAGATGTAGATACCCGAGCTTACTTCACTTCAGCAACTATAATTATT  
GCGGTTCCAACCTGGGATTAAGTCTTTAGATGACTAGCCACCTTTTCATGGAACCT  
CAAATTTTAAATAGACCAGTAACCCTGTGAGCTTTAGGTTTTGTATTTTTATTTAC  
AGTAGGAGGATTAACAGGGGTAATTTTAGCTAATTCTTCAATTGATATTATTCTTC  
ACGATACTTACTATGTAGTAGCTCATTTTTCACTATGTTCTTTCTATAGGAGCTGTA  
TTTGCAATTATAGCCGGAATTGTCCAATGATTCCCATTATTTACCGGACTAACCT  
TAAATAATTTTTTTTTTAAAAACCCAATTTATTACTATATTTTTAGGTGTAAATTTAAC  
ATTTTTTCCCCAACACTTTTTAGGGCTAAGAGGAATGCCTCGGCGATATTCCGGAT  
TATCCAGATGCTTTCACTATCTGAAATGCCATTTTCATCTATTGGTTCCATTATTTT



TCTCACAAGAATTATCTTTTTTTTTATTTATCTTATGAGAAAGGCTTTCTTCCCAAC  
GTAATCTTTGAGAACTTTAAATGTAACAACCTTCAATTGAATGGTTCAAGCCCTAC  
CCCCTAGTG

AQU4

ATTATTAGACAAGAAAGGGGGGAAAAAAGAAGCTTTTGGACCTTAGGAATAATTTA  
TGCCATGATAGCTATCGGATTATTAGGATTCGTAGTCTGAGCTCACCATATATTT  
ACAGTAGATAGATGTAGATACCCGAGCTTACTTCACTTCAGCAACTATAATTATT  
GCGGTTCCAACCTGGGATTAAGTCTTTAGATGACTAGCCACCTTTTCATGGAACCT  
CAAATTTTAAATAGACCAGTAACCCTGTGAGCTTTAGGTTTTGTATTTTTATTTAC  
AGTAGGAGGATTAACAGGGGTAATTTAGCTAATTCTTCAATTGATATTATTCTTC  
ACGATACTTACTATGTAGTAGCTCATTTTCACTATGTTCTTTCTATAGGAGCTGTA  
TTTGCAATTATAGCCGGAATTGTCCAATGATTCCCATTATTTACCGGACTAACCT  
TAAATAATTTTTTTTTTAAAAACCCAATTTATTACTATATTTTTAGGTGTAAATTTAAC  
ATTTTTTCCCAACACTTTTTAGGGCTAAGAGGAATGCCTCGGCGATATTTCGGAT  
TATCCAGATGCTTTCACTATCTGAAATGCCATTTTCATCTATTGGTTCCATTATTTTC  
TCTCACAAGAATTATCTTTTTTTTTATTTATCTTATGAGAAAGGCTTTCTTCCCAAC  
GTAATCTTTGAGAACTTTAAATGTAACAACCTTCAATTGAATGGTTCAAGCCCTAC  
CCCCTAGTG

bj1

ATTATTAGACAAGAAAGGGGGGAAAAAAGAAGCTTTTGGACCTTAGGAATAATTTA  
TGCCATGATAGCTATCGGATTATTAGGATTCGTAGTTTGAGCTCACCATATATTT  
ACAGTAGATAGATGTAGATACCCGAGCTTACTTCACTTCAGCAACTATAATTATT  
GCGGTTCCAACCTGGGATTAAGTCTTTAGATGACTAGCCACCTTTTCATGGAACCT  
CAAATTTTAAATAGACCAGTAACCCTGTGAGCTTTAGGTTTTGTATTTTTATTTAC  
AGTAGGAGGATTAACAGGGGTAATTTAGCTAATTCTTCAATTGATATTATTCTTC  
ACGATACTTACTATGTAGTAGCTCATTTTCACTATGTTCTTTCTATAGGAGCTGTA  
TTTGCAATTATAGCCGGAATTGTCCAATGATTCCCATTATTTACCGGACTAACCT  
TAAATAATTTTTTTTTTAAAAACCCAATTTATTACTATATTTTTAGGTGTAAATTTAAC  
ATTTTTTCCCAACACTTTTTAGGGCTAAGAGGAATGCCTCGGCGATATTTCGGAT  
TATCCAGATGCTTTCACTATCTGAAATGCCATTTTCATCTATTGGTTCCATTATTTTC  
TCTCACAAGAATTATCTTTTTTTTTATTTATCTTATGAGAAAGGCTTTCTTCCCAAC  
GTAATCTTTGAGAACTTTAAATGTAACAACCTTCAATTGAATGGTTCAAGCCCTAC  
CCCCTAGTG

BJA2

ATTATTAGACAAGAAAGGGGGGAAAAAAGAAGCTTTTGGACCTTAGGAATAATTTA  
TGCCATGATAGCTATCGGATTATTAGGATTCGTAGTTTGAGCTCACCATATATTT  
ACAGTAGATAGATGTAGATACCCGAGCTTACTTCACTTCAGCAACTATAATTATT  
GCGGTTCCAACCTGGGATTAAGTCTTTAGATGACTAGCCACCTTTTCATGGAACCT  
CAAATTTTAAATAGACCAGTAACCCTGTGAGCTTTAGGTTTTGTATTTTTATTTAC  
AGTAGGAGGATTAACAGGGGTAATTTAGCTAATTCTTCAATTGATATTATTCTTC  
ACGATACTTACTATGTAGTAGCTCATTTTCACTATGTTCTTTCTATAGGAGCTGTA  
TTTGCAATTATAGCCGGAATTGTCCAATGATTCCCATTATTTACCGGACTAACCT  
TAAATAATTTTTTTTTTAAAAACCCAATTTATTACTATATTTTTAGGTGTAAATTTAAC  
ATTTTTTCCCAACACTTTTTAGGGCTAAGAGGAATGCCTCGGCGATATTTCGGAT  
TATCCAGATGCTTTCACTATCTGAAATGCCATTTTCATCTATTGGTTCCATTATTTTC  
TCTCACAAGAATTATCTTTTTTTTTATTTATCTTATGAGAAAGGCTTTCTTCCCAAC  
GTAATCTTTGAGAACTTTAAATGTAACAACCTTCAATTGAATGGTTCAAGCCCTAC  
CCCCTAGTG

BJA4

ATTATTAGACAAGAAAGGGGGGAAAAAAGAAGCTTTTGGACCTTAGGAATAATTTA

TGCCATGATAGCTATCGGATTATTAGGATTCGTAGTTTGAGCTCACCATATATTT  
ACAGTAGATAGATGTAGATACCCGAGCTTACTTCACTTCAGCAACTATAATTATT  
GCGGTTCCAACACTGGGATTAAGTCTTTAGATGACTAGCCACCTTTCATGGAAC  
CAAATTTTAAATAGACCAGTAACCCTGTGAGCTTTAGGTTTTGTATTTTTATTTAC  
AGTAGGAGGATTAACAGGGGTAATTTAGCTAATTCTTCAATTGATATTATTCTTC  
ACGATACTTACTATGTAGTAGCTCATTTTCACTATGTTCTTTCTATAGGAGCTGTA  
TTTGCAATTATAGCCGGAATTGTCCAATGATTCCCATTTTACCGGACTAACCT  
TAAATAATTTTTTTTTTAAAAACCCAATTTATTACTATATTTTTAGGTGTAAATTTAAC  
ATTTTTTCCCAACACTTTTTAGGGCTAAGAGGAATGCCTCGGCGATATTTCGGAT  
TATCCAGATGCTTTCCTATCTGAAATGCCATTTTCACTATTGGTTCCATTATTTTC  
TCTCACAAGAATTATCTTTTTTTTTATTTATCTTATGAGAAAGGCTTTCTTCCCAAC  
GTAATCTTTGAGAACTTTAAATGTAACAACCTTCAATTGAATGGTTCAAGCCCTAC  
CCCCTAGTG

CAM1

ATTATTAGACAAGAAAGGGGGGAAAAAAGAAGCTTTTGGACCTTAGGAATAATTTA  
TGCCATGATAGCTATCGGATTATTAGGATTCGTAGTTTGAGCTCACCATATATTT  
ACAGTAGATAGATGTAGATACCCGAGCTTACTTCACTTCAGCAACTATAATTATT  
GCGGTTCCAACACTGGGATTAAGTCTTTAGATGACTAGCCACCTTTCATGGAAC  
CAAATTTTAAATAGACCAGTAACCCTGTGAGCTTTAGGTTTTGTATTTTTATTTAC  
AGTAGGAGGATTAACAGGGGTAATTTAGCTAATTCTTCAATTGATATTATTCTTC  
ACGATACTTACTATGTAGTAGCTCATTTTCACTATGTTCTTTCTATAGGAGCTGTA  
TTTGCAATTATAGCCGGAATTGTCCAATGATTCCCATTTTACCGGACTAACCT  
TAAATAATTTTTTTTTTAAAAACCCAATTTATTACTATATTTTTAGGTGTAAATTTAAC  
ATTTTTTCCCAACACTTTTTAGGGCTAAGAGGAATGCCTCGGCGATATTTCGGAT  
TATCCAGATGCTTTCCTATCTGAAATGCCATTTTCACTATTGGTTCCATTATTTTC  
TCTCACAAGAATTATCTTTTTTTTTATTTATCTTATGAGAAAGGCTTTCTTCCCAAC  
GTAATCTTTGAGAACTTTAAATGTAACAACCTTCAATTGAATGGTTCAAGCCCTAC  
CCCCTAGTG

CAM2

ATTATTAGACAAGAAAGGGGGGAAAAAAGAAGCTTTTGGACCTTAGGAATAATTTA  
TGCCATGATAGCTATCGGATTATTAGGATTCGTAGTTTGAGCTCACCATATATTT  
ACAGTAGATAGATGTAGATACCCGAGCTTACTTCACTTCAGCAACTATAATTATT  
GCGGTTCCAACACTGGGATTAAGTCTTTAGATGACTAGCCACCTTTCATGGAAC  
CAAATTTTAAATAGACCAGTAACCCTGTGAGCTTTAGGTTTTGTATTTTTATTTAC  
AGTAGGAGGATTAACAGGGGTAATTTAGCTAATTCTTCAATTGATATTATTCTTC  
ACGATACTTACTATGTAGTAGCTCATTTTCACTATGTTCTTTCTATAGGAGCTGTA  
TTTGCAATTATAGCCGGAATTGTCCAATGATTCCCATTTTACCGGACTAACCT  
TAAATAATTTTTTTTTTAAAAACCCAATTTATTACTATATTTTTAGGTGTAAATTTAAC  
ATTTTTTCCCAACACTTTTTAGGGCTAAGAGGAATGCCTCGGCGATATTTCGGAT  
TATCCAGATGCTTTCCTATCTGAAATGCCATTTTCACTATTGGTTCCATTATTTTC  
TCTCACAAGAATTATCTTTTTTTTTATTTATCTTATGAGAAAGGCTTTCTTCCCAAC  
GTAATCTTTGAGAACTTTAAATGTAACAACCTTCAATTGAATGGTTCAAGCCCTAC  
CCCCTAGTG

CMO1\_1

ATTATTAGACAAGAAAGGGGGGAAAAAAGAAGCTTTTGGACCTTAGGAATAATTTA  
TGCCATGATAGCTATCGGATTATTAGGATTCGTAGTTTGAGCTCACCATATATTT  
ACAGTAGATAGATGTAGATACCCGAGCTTACTTCACTTCAGCAACTATAATTATT  
GCGGTTCCAACACTGGGATTAAGTCTTTAGATGACTAGCCACCTTTCATGGAAC  
CAAATTTTAAATAGACCAGTAACCCTGTGAGCTTTAGGTTTTGTATTTTTATTTAC  
AGTAGGAGGATTAACAGGGGTAATTTAGCTAATTCTTCAATTGATATTATTCTTC

ACGATACTTACTATGTAGTAGCTCATTTTTCACTATGTTCTTTCTATAGGAGCTGTA  
TTTGCAATTATAGCCGGAATTGTCCAATGATTCCCATTATTTACCGGACTAACCT  
TAAATAATTTTTTTTTTAAAAACCCAATTTATTACTATATTTTTAGGTGTAAATTTAAC  
ATTTTTTCCCAACACTTTTTAGGGCTAAGAGGAATGCCTCGGCGATATTCCGGAT  
TATCCAGATGCTTTCACTATCTGAAATGCCATTTTCATCTATTGGTTCCATTATTTTC  
TCTCACAAGAATTATCTTTTTTTTTATTTATCTTATGAGAAAGGCTTTCTTCCCAAC  
GTAATCTTTGAGAACTTTAAATGTAACAACCTTCAATTGAATGGTTCAAGCCCTAC  
CCCCTAGTG

CMO1\_2

ATTATTAGACAAGAAAGGGGGGAAAAAAGAAGCTTTTGGACCTTAGGAATAATTTA  
TGCCATGATAGCTATCGGATTATTAGGATTCGTAGTTTGAGCTCACCATATATTT  
ACAGTAGATAGATGTAGATACCCGAGCTTACTTCACTTCAGCAACTATAATTATT  
GCGGTTCCAACCTGGGATTAAGTCTTTAGATGACTAGCCACCTTTCATGGAACCT  
CAAATTTTAAATAGACCAGTAACCCTGTGAGCTTTAGGTTTTGTATTTTTATTTAC  
AGTAGGAGGATTAACAGGGGTAATTTTAGCTAATTCTTCAATTGATATTATTCTTC  
ACGATACTTACTATGTAGTAGCTCATTTTTCACTATGTTCTTTCTATAGGAGCTGTA  
TTTGCAATTATAGCCGGAATTGTCCAATGATTCCCATTATTTACCGGACTAACCT  
TAAATAATTTTTTTTTTAAAAACCCAATTTATTACTATATTTTTAGGTGTAAATTTAAC  
ATTTTTTCCCAACACTTTTTAGGGCTAAGAGGAATGCCTCGGCGATATTCCGGAT  
TATCCAGATGCTTTCACTATCTGAAATGCCATTTTCATCTATTGGTTCCATTATTTTC  
TCTCACAAGAATTATCTTTTTTTTTATTTATCTTATGAGAAAGGCTTTCTTCCCAAC  
GTAATCTTTGAGAACTTTAAATGTAACAACCTTCAATTGAATGGTTCAAGCCCTAC  
CCCCTAGTG

CMO2\_1

ATTATTAGACAAGAAAGGGGGGAAAAAAGAAGCTTTTGGACCTTAGGAATAATTTA  
TGCCATGATAGCTATCGGATTATTAGGATTCGTAGTTTGAGCTCACCATATATTT  
ACAGTAGATAGATGTAGATACCCGAGCTTACTTCACTTCAGCAACTATAATTATT  
GCGGTTCCAACCTGGGATTAAGTCTTTAGATGACTAGCCACCTTTCATGGAACCT  
CAAATTTTAAATAGACCAGTAACCCTGTGAGCTTTAGGTTTTGTATTTTTATTTAC  
AGTAGGAGGATTAACAGGGGTAATTTTAGCTAATTCTTCAATTGATATTATTCTTC  
ACGATACTTACTATGTAGTAGCTCATTTTTCACTATGTTCTTTCTATAGGAGCTGTA  
TTTGCAATTATAGCCGGAATTGTCCAATGATTCCCATTATTTACCGGACTAACCT  
TAAATAATTTTTTTTTTAAAAACCCAATTTATTACTATATTTTTAGGTGTAAATTTAAC  
ATTTTTTCCCAACACTTTTTAGGGCTAAGAGGAATGCCTCGGCGATATTCCGGAT  
TATCCAGATGCTTTCACTATCTGAAATGCCATTTTCATCTATTGGTTCCATTATTTTC  
TCTCACAAGAATTATCTTTTTTTTTATTTATCTTATGAGAAAGGCTTTCTTCCCAAC  
GTAATCTTTGAGAACTTTAAATGTAACAACCTTCAATTGAATGGTTCAAGCCCTAC  
CCCCTAGTG

CMO2\_2

ATTATTAGACAAGAAAGGGGGGAAAAAAGAAGCTTTTGGACCTTAGGAATAATTTA  
TGCCATGATAGCTATCGGATTATTAGGATTCGTAGTTTGAGCTCACCATATATTT  
ACAGTAGATAGATGTAGATACCCGAGCTTACTTCACTTCAGCAACTATAATTATT  
GCGGTTCCAACCTGGGATTAAGTCTTTAGATGACTAGCCACCTTTCATGGAACCT  
CAAATTTTAAATAGACCAGTAACCCTGTGAGCTTTAGGTTTTGTATTTTTATTTAC  
AGTAGGAGGATTAACAGGGGTAATTTTAGCTAATTCTTCAATTGATATTATTCTTC  
ACGATACTTACTATGTAGTAGCTCATTTTTCACTATGTTCTTTCTATAGGAGCTGTA  
TTTGCAATTATAGCCGGAATTGTCCAATGATTCCCATTATTTACCGGACTAACCT  
TAAATAATTTTTTTTTTAAAAACCCAATTTATTACTATATTTTTAGGTGTAAATTTAAC  
ATTTTTTCCCAACACTTTTTAGGGCTAAGAGGAATGCCTCGGCGATATTCCGGAT  
TATCCAGATGCTTTCACTATCTGAAATGCCATTTTCATCTATTGGTTCCATTATTTTC

TCTCACAAGAATTATCTTTTTTTTTATTTATCTTATGAGAAAGGCTTTCTTCCCAAC  
GTAATCTTTGAGAACTTTAAATGTAACAACCTTCAATTGAATGGTTCAAGCCCTAC  
CCCCTAGTG

COI1

ATTATTAGACAAGAAAGGGGGGAAAAAAGAAGCTTTTGGACCTTAGGAATAATTTA  
TGCCATGATAGCTATCGGATTATTAGGATTCGTAGTTTGAGCTCACCATATATTT  
ACAGTAGATAGATGTAGATACCCGAGCTTACTTCACTTCAGCAACTATAATTATT  
GCGGTTCCAACCTGGGATTAAGTCTTTAGATGACTAGCCACCTTTTCATGGAACCT  
CAAATTTTAAATAGACCAGTAACCCTGTGAGCTTTAGGTTTTGTATTTTTATTTAC  
AGTAGGAGGATTAACAGGGGTAATTTAGCTAATTCTTCAATTGATATTATTCTTC  
ACGATACTTACTATGTAGTAGCTCATTTTCACTATGTTCTTTCTATAGGAGCTGTA  
TTTGCAATTATAGCCGGAATTGTCCAATGATTCCCATTATTTACCGGACTAACCT  
TAAATAATTTTTTTTTTAAAAACCCAATTTATTACTATATTTTTAGGTGTAAATTTAAC  
ATTTTTTCCCAACACTTTTTAGGGCTAAGAGGAATGCCTCGGCGATATTTCGGAT  
TATCCAGATGCTTTCACTATCTGAAATGCCATTTTCATCTATTGGTTCCATTATTTTC  
TCTCACAAGAATTATCTTTTTTTTTATTTATCTTATGAGAAAGGCTTTCTTCCCAAC  
GTAATCTTTGAGAACTTTAAATGTAACAACCTTCAATTGAATGGTTCAAGCCCTAC  
CCCCTAGTG

CSJ1

ATTATTAGACAAGAAAGGGGGGAAAAAAGAAGCTTTTGGACCTTAGGAATAATTTA  
TGCCATGATAGCTATCGGATTATTAGGATTCGTAGTTTGAGCTCACCATATATTT  
ACAGTAGATAGATGTAGATACCCGAGCTTACTTCACTTCAGCAACTATAATTATT  
GCGGTTCCAACCTGGGATTAAGTCTTTAGATGACTAGCCACCTTTTCATGGAACCT  
CAAATTTTAAATAGACCAGTAACCCTGTGAGCTTTAGGTTTTGTATTTTTATTTAC  
AGTAGGAGGATTAACAGGGGTAATTTAGCTAATTCTTCAATTGATATTATTCTTC  
ACGATACTTACTATGTAGTAGCTCATTTTCACTATGTTCTTTCTATAGGAGCTGTA  
TTTGCAATTATAGCCGGAATTGTCCAATGATTCCCATTATTTACCGGACTAACCT  
TAAATAATTTTTTTTTTAAAAACCCAATTTATTACTATATTTTTAGGTGTAAATTTAAC  
ATTTTTTCCCAACACTTTTTAGGGCTAAGAGGAATGCCTCGGCGATATTTCGGAT  
TATCCAGATGCTTTCACTATCTGAAATGCCATTTTCATCTATTGGTTCCATTATTTTC  
TCTCACAAGAATTATCTTTTTTTTTATTTATCTTATGAGAAAGGCTTTCTTCCCAAC  
GTAATCTTTGAGAACTTTAAATGTAACAACCTTCAATTGAATGGTTCAAGCCCTAC  
CCCCTAGTG

ERV1

ATTATTAGACAAGAAAGGGGGGAAAAAAGAAGCTTTTGGACCTTAGGAATAATTTA  
TGCCATGATAGCTATCGGATTATTAGGATTCGTAGTTTGAGCTCACCATATATTT  
ACAGTAGATAGATGTAGATACCCGAGCTTACTTCACTTCAGCAACTATAATTATT  
GCGGTTCCAACCTGGGATTAAGTCTTTAGATGACTAGCCACCTTTTCATGGAACCT  
CAAATTTTAAATAGACCAGTAACCCTGTGAGCTTTAGGTTTTGTATTTTTATTTAC  
AGTAGGAGGATTAACAGGGGTAATTTAGCTAATTCTTCAATTGATATTATTCTTC  
ACGATACTTACTATGTAGTAGCTCATTTTCACTATGTTCTTTCTATAGGAGCTGTA  
TTTGCAATTATAGCCGGAATTGTCCAATGATTCCCATTATTTACCGGACTAACCT  
TAAATAATTTTTTTTTTAAAAACCCAATTTATTACTATATTTTTAGGTGTAAATTTAAC  
ATTTTTTCCCAACACTTTTTAGGGCTAAGAGGAATGCCTCGGCGATATTTCGGAT  
TATCCAGATGCTTTCACTATCTGAAATGCCATTTTCATCTATTGGTTCCATTATTTTC  
TCTCACAAGAATTATCTTTTTTTTTATTTATCTTATGAGAAAGGCTTTCTTCCCAAC  
GTAATCTTTGAGAACTTTAAATGTAACAACCTTCAATTGAATGGTTCAAGCCCTAC  
CCCCTAGTG

ERV2

ATTATTAGACAAGAAAGGGGGGAAAAAAGAAGCTTTTGGACCTTAGGAATAATTTA

TGCCATGATAGCTATCGGATTATTAGGATTCGTAGTTTGAGCTCACCATATATTT  
ACAGTAGATAGATGTAGATACCCGAGCTTACTTCACTTCAGCAACTATAATTATT  
GCGGTTCCAACACTGGGATTAAGTCTTTAGATGACTAGCCACCTTTCATGGAAC  
CAAATTTTAAATAGACCAGTAACCCTGTGAGCTTTAGGTTTTGTATTTTTATTTAC  
AGTAGGAGGATTAACAGGGGTAATTTAGCTAATTCTTCAATTGATATTATTCTTC  
ACGATACTTACTATGTAGTAGCTCATTTTCACTATGTTCTTTCTATAGGAGCTGTA  
TTTGCAATTATAGCCGGAATTGTCCAATGATTCCCATTTTACCGGACTAACCT  
TAAATAATTTTTTTTTTAAAAACCCAATTTATTACTATATTTTTAGGTGTAAATTTAAC  
ATTTTTTCCCAACACTTTTTAGGGCTAAGAGGAATGCCTCGGCGATATTGCGAT  
TATCCAGATGCTTTCCTATCTGAAATGCCATTTTCACTATTGGTTCCATTATTTTC  
TCTCACAAGAATTATCTTTTTTTTTATTTATCTTATGAGAAAGGCTTTCTTCCCAAC  
GTAATCTTTGAGAACTTTAAATGTAACAACCTTCAATTGAATGGTTCAAGCCCTAC  
CCCCTAGTG

GOV1

ATTATTAGACAAGAAAGGGGGAAAAAAGAAGCTTTTGGACCTTAGGAATAATTTA  
TGCCATGATAGCTATCGGATTATTAGGATTCGTAGTTTGAGCTCACCATATATTT  
ACAGTAGATAGATGTAGATACCCGAGCTTACTTCACTTCAGCAACTATAATTATT  
GCGGTTCCAACACTGGGATTAAGTCTTTAGATGACTAGCCACCTTTCATGGAAC  
CAAATTTTAAATAGACCAGTAACCCTGTGAGCTTTAGGTTTTGTATTTTTATTTAC  
AGTAGGAGGATTAACAGGGGTAATTTAGCTAATTCTTCAATTGATATTATTCTTC  
ACGATACTTACTATGTAGTAGCTCATTTTCACTATGTTCTTTCTATAGGAGCTGTA  
TTTGCAATTATAGCCGGAATTGTCCAATGATTCCCATTTTACCGGACTAACCT  
TAAATAATTTTTTTTTTAAAAACCCAATTTATTACTATATTTTTAGGTGTAAATTTAAC  
ATTTTTTCCCAACACTTTTTAGGGCTAAGAGGAATGCCTCGGCGATATTGCGAT  
TATCCAGATGCTTTCCTATCTGAAATGCCATTTTCACTATTGGTTCCATTATTTTC  
TCTCACAAGAATTATCTTTTTTTTTATTTATCTTATGAGAAAGGCTTTCTTCCCAAC  
GTAATCTTTGAGAACTTTAAATGTAACAACCTTCAATTGAATGGTTCAAGCCCTAC  
CCCCTAGTG

GOV2

ATTATTAGACAAGAAAGGGGGAAAAAAGAAGCTTTTGGACCTTAGGAATAATTTA  
TGCCATGATAGCTATCGGATTATTAGGATTCGTAGTTTGAGCTCACCATATATTT  
ACAGTAGATAGATGTAGATACCCGAGCTTACTTCACTTCAGCAACTATAATTATT  
GCGGTTCCAACACTGGGATTAAGTCTTTAGATGACTAGCCACCTTTCATGGAAC  
CAAATTTTAAATAGACCAGTAACCCTGTGAGCTTTAGGTTTTGTATTTTTATTTAC  
AGTAGGAGGATTAACAGGGGTAATTTAGCTAATTCTTCAATTGATATTATTCTTC  
ACGATACTTACTATGTAGTAGCTCATTTTCACTATGTTCTTTCTATAGGAGCTGTA  
TTTGCAATTATAGCCGGAATTGTCCAATGATTCCCATTTTACCGGACTAACCT  
TAAATAATTTTTTTTTTAAAAACCCAATTTATTACTATATTTTTAGGTGTAAATTTAAC  
ATTTTTTCCCAACACTTTTTAGGGCTAAGAGGAATGCCTCGGCGATATTGCGAT  
TATCCAGATGCTTTCCTATCTGAAATGCCATTTTCACTATTGGTTCCATTATTTTC  
TCTCACAAGAATTATCTTTTTTTTTATTTATCTTATGAGAAAGGCTTTCTTCCCAAC  
GTAATCTTTGAGAACTTTAAATGTAACAACCTTCAATTGAATGGTTCAAGCCCTAC  
CCCCTAGTG

HEM1

ATTATTAGACAAGAAAGGGGGAAAAAAGAAGCTTTTGGACCTTAGGAATAATTTA  
TGCCATGATAGCTATCGGATTATTAGGATTCGTAGTTTGAGCTCACCATATATTT  
ACAGTAGATAGATGTAGATACCCGAGCTTACTTCACTTCAGCAACTATAATTATT  
GCGGTTCCAACACTGGGATTAAGTCTTTAGATGACTAGCCACCTTTCATGGAAC  
CAAATTTTAAATAGACCAGTAACCCTGTGAGCTTTAGGTTTTGTATTTTTATTTAC  
AGTAGGAGGATTAACAGGGGTAATTTAGCTAATTCTTCAATTGATATTATTCTTC

ACGATACTTACTATGTAGTAGCTCATTTTTCACTATGTTCTTTCTATAGGAGCTGTA  
TTTGCAATTATAGCCGGAATTGTCCAATGATTCCCATTATTTACCGGACTAACCT  
TAAATAATTTTTTTTTAAAAACCCAATTTATTACTATATTTTTAGGTGTAAATTTAAC  
ATTTTTTCCCAACACTTTTTAGGGCTAAGAGGAATGCCTCGGCGATATTCCGGAT  
TATCCAGATGCTTTCACTATCTGAAATGCCATTTTCATCTATTGGTTCCATTATTTT  
TCTCACAAGAATTATCTTTTTTTTTATTTATCTTATGAGAAAGGCTTTCTTCCCAAC  
GTAATCTTTGAGAACTTTAAATGTAACAACCTTCAATTGAATGGTTCAAGCCCTAC  
CCCCTAGTG

HEM2

ATTATTAGACAAGAAAGGGGGGAAAAAGAAGCTTTTGGACCTTAGGAATAATTTA  
TGCCATGATAGCTATCGGATTATTAGGATTCGTAGTTTGAGCTCACCATATATTT  
ACAGTAGATAGATGTAGATACCCGAGCTTACTTCACTTCAGCAACTATAATTATT  
GCGGTTCCAACACTGGGATTAAGTCTTTAGATGACTAGCCACCTTTCATGGAAC  
CAAATTTTAAATAGACCAGTAACCCTGTGAGCTTTAGGTTTTGTATTTTTATTTAC  
AGTAGGAGGATTAACAGGGGTAATTTTAGCTAATTCTTCAATTGATATTATTCTTC  
ACGATACTTACTATGTAGTAGCTCATTTTTCACTATGTTCTTTCTATAGGAGCTGTA  
TTTGCAATTATAGCCGGAATTGTCCAATGATTCCCATTATTTACCGGACTAACCT  
TAAATAATTTTTTTTTAAAAACCCAATTTATTACTATATTTTTAGGTGTAAATTTAAC  
ATTTTTTCCCAACACTTTTTAGGGCTAAGAGGAATGCCTCGGCGATATTCCGGAT  
TATCCAGATGCTTTCACTATCTGAAATGCCATTTTCATCTATTGGTTCCATTATTTT  
TCTCACAAGAATTATCTTTTTTTTTATTTATCTTATGAGAAAGGCTTTCTTCCCAAC  
GTAATCTTTGAGAACTTTAAATGTAACAACCTTCAATTGAATGGTTCAAGCCCTAC  
CCCCTAGTG

HER1

ATTATTAGACAAGAAAGGGGGGAAAAAGAAGCTTTTGGACCTTAGGAATAATTTA  
TGCCATGATAGCTATCGGATTATTAGGATTCGTAGTTTGAGCTCACCATATATTT  
ACAGTAGATAGATGTAGATACCCGAGCTTACTTCACTTCAGCAACTATAATTATT  
GCGGTTCCAACACTGGGATTAAGTCTTTAGATGACTAGCCACCTTTCATGGAAC  
CAAATTTTAAATAGACCAGTAACCCTGTGAGCTTTAGGTTTTGTATTTTTATTTAC  
AGTAGGAGGATTAACAGGGGTAATTTTAGCTAATTCTTCAATTGATATTATTCTTC  
ACGATACTTACTATGTAGTAGCTCATTTTTCACTATGTTCTTTCTATAGGAGCTGTA  
TTTGCAATTATAGCCGGAATTGTCCAATGATTCCCATTATTTACCGGACTAACCT  
TAAATAATTTTTTTTTAAAAACCCAATTTATTACTATATTTTTAGGTGTAAATTTAAC  
ATTTTTTCCCAACACTTTTTAGGGCTAAGAGGAATGCCTCGGCGATATTCCGGAT  
TATCCAGATGCTTTCACTATCTGAAATGCCATTTTCATCTATTGGTTCCATTATTTT  
TCTCACAAGAATTATCTTTTTTTTTATTTATCTTATGAGAAAGGCTTTCTTCCCAAC  
GTAATCTTTGAGAACTTTAAATGTAACAACCTTCAATTGAATGGTTCAAGCCCTAC  
CCCCTAGTG

HER2

ATTATTAGACAAGAAAGGGGGGAAAAAGAAGCTTTTGGACCTTAGGAATAATTTA  
TGCCATGATAGCTATCGGATTATTAGGATTCGTAGTTTGAGCTCACCATATATTT  
ACAGTAGATAGATGTAGATACCCGAGCTTACTTCACTTCAGCAACTATAATTATT  
GCGGTTCCAACACTGGGATTAAGTCTTTAGATGACTAGCCACCTTTCATGGAAC  
CAAATTTTAAATAGACCAGTAACCCTGTGAGCTTTAGGTTTTGTATTTTTATTTAC  
AGTAGGAGGATTAACAGGGGTAATTTTAGCTAATTCTTCAATTGATATTATTCTTC  
ACGATACTTACTATGTAGTAGCTCATTTTTCACTATGTTCTTTCTATAGGAGCTGTA  
TTTGCAATTATAGCCGGAATTGTCCAATGATTCCCATTATTTACCGGACTAACCT  
TAAATAATTTTTTTTTAAAAACCCAATTTATTACTATATTTTTAGGTGTAAATTTAAC  
ATTTTTTCCCAACACTTTTTAGGGCTAAGAGGAATGCCTCGGCGATATTCCGGAT  
TATCCAGATGCTTTCACTATCTGAAATGCCATTTTCATCTATTGGTTCCATTATTTT

TCTCACAAGAATTATCTTTTTTTTTATTTATCTTATGAGAAAGGCTTTCTTCCCAAC  
GTAATCTTTGAGAACTTTAAATGTAACAACCTTCAATTGAATGGTTCAAGCCCTAC  
CCCCTAGTG

HEV1

ATTATTAGACAAGAAAGGGGGGAAAAAAGAAGCTTTTGGACCTTAGGAATAATTTA  
TGCCATGATAGCTATCGGATTATTAGGATTCGTAGTTTGAGCTCACCATATATTT  
ACAGTAGATAGATGTAGATACCCGAGCTTACTTCACTTCAGCAACTATAATTATT  
GCGGTTCCAACCTGGGATTAAGTCTTTAGATGACTAGCCACCTTTTCATGGAAC  
CAAATTTTAAATAGACCAGTAACCCTGTGAGCTTTAGGTTTTGTATTTTTATTTAC  
AGTAGGAGGATTAACAGGGGTAATTTAGCTAATTCTTCAATTGATATTATTCTTC  
ACGATACTTACTATGTAGTAGCTCATTTTCACTATGTTCTTTCTATAGGAGCTGTA  
TTTGCAATTATAGCCGGAATTGTCCAATGATTCCCATTATTTACCGGACTAACCT  
TAAATAATTTTTTTTTAAAAACCCAATTTATTACTATATTTTTAGGTGTAAATTTAAC  
ATTTTTTCCCAACACTTTTTAGGGCTAAGAGGAATGCCTCGGCGATATTTCGGAT  
TATCCAGATGCTTTCACTATCTGAAATGCCATTTTCATCTATTGGTTCCATTATTTCT  
TCTCACAAGAATTATCTTTTTTTTTATTTATCTTATGAGAAAGGCTTTCTTCCCAAC  
GTAATCTTTGAGAACTTTAAATGTAACAACCTTCAATTGAATGGTTCAAGCCCTAC  
CCCCTAGTG

HEV1\_2

ATTATTAGACAAGAAAGGGGGGAAAAAAGAAGCTTTTGGACCTTAGGAATAATTTA  
TGCCATGATAGCTATCGGATTATTAGGATTCGTAGTTTGAGCTCACCATATATTT  
ACAGTAGATAGATGTAGATACCCGAGCTTACTTCACTTCAGCAACTATAATTATT  
GCGGTTCCAACCTGGGATTAAGTCTTTAGATGACTAGCCACCTTTTCATGGAAC  
CAAATTTTAAATAGACCAGTAACCCTGTGAGCTTTAGGTTTTGTATTTTTATTTAC  
AGTAGGAGGATTAACAGGGGTAATTTAGCTAATTCTTCAATTGATATTATTCTTC  
ACGATACTTACTATGTAGTAGCTCATTTTCACTATGTTCTTTCTATAGGAGCTGTA  
TTTGCAATTATAGCCGGAATTGTCCAATGATTCCCATTATTTACCGGACTAACCT  
TAAATAATTTTTTTTTAAAAACCCAATTTATTACTATATTTTTAGGTGTAAATTTAAC  
ATTTTTTCCCAACACTTTTTAGGGCTAAGAGGAATGCCTCGGCGATATTTCGGAT  
TATCCAGATGCTTTCACTATCTGAAATGCCATTTTCATCTATTGGTTCCATTATTTCT  
TCTCACAAGAATTATCTTTTTTTTTATTTATCTTATGAGAAAGGCTTTCTTCCCAAC  
GTAATCTTTGAGAACTTTAAATGTAACAACCTTCAATTGAATGGTTCAAGCCCTAC  
CCCCTAGTG

HEV2

ATTATTAGACAAGAAAGGGGGGAAAAAAGAAGCTTTTGGACCTTAGGAATAATTTA  
TGCCATGATAGCTATCGGATTATTAGGATTCGTAGTTTGAGCTCACCATATATTT  
ACAGTAGATAGATGTAGATACCCGAGCTTACTTCACTTCAGCAACTATAATTATC  
GCGGTTCCAACCTGGGATTAAGTCTTTAGGTGACTAGCCACCTTTTCATGGAAC  
CAAATTTTAAATAGACCAGTAACCCTGTGAGCTTTAGGTTTTGTATTTTTATTTAC  
AGTAGGAGGATTAACAGGGGTAATTTAGCTAATTCTTCAATTGATATTATTCTTC  
ACGATACTTACTATGTAGTAGCTCATTTTCACTATGTTCTTTCTATAGGAGCTGTA  
TTTGCAATTATAGCCGGAATTGTCCAATGATTCCCATTATTTACTGGACTAACCTT  
AAATAATTTTTTTTTAAAAACCCAATTTATTACTATATTTTTAGGTGTAAATTTAAC  
TTTTTTCCTCAACACTTTTTAGGGCTAAGAGGAATGCCTCGGCGATATTTCGGATT  
ATCCAGATGCTTTCACTATCTGAAATGCCATTTTCATCTATTGGTTCCATTATTTCT  
CTCACAAGAATTATCTTTTTTTTTATTTATCTTATGAGAAAGGCTTTCTTCCCAACG  
TAAATCTTTGAGAACTTTAAATGTAACAACCTTCAATTGAATGGTTCAAGCCCTACC  
CCCTAGTG

HEV2\_2

ATTATTAGACAAGAAAGGGGGGAAAAAAGAAGCTTTTGGACCTTAGGAATAATTTA

TGCCATGATAGCTATCGGATTATTAGGATTCGTAGTTTGAGCTCACCATATATTT  
ACAGTAGATAGATGTAGATACCCGAGCTTACTTCACTTCAGCAACTATAATTATC  
GCGGTTCCAACACTGGGATTAAGTCTTTAGGTGACTAGCCACCTTTCATGGAAC  
CAAATTTTAAATAGACCAGTAACCCTGTGAGCTTTAGGTTTTGTATTTTTATTTAC  
AGTAGGAGGATTAACAGGGGTAATTTAGCTAATTCTTCAATTGATATTATTCTTC  
ACGATACTTACTATGTAGTAGCTCATTTTCACTATGTTCTTTCTATAGGAGCTGTA  
TTTGCAATTATAGCCGGAATTGTCCAATGATTCCCATTTACTGGACTAACCTT  
AAATAATTTTTTTTTAAAAACCCAATTTATTACTATATTTTTAGGTGTAAATTTAACA  
TTTTTTCCTCAACACTTTTTAGGGCTAAGAGGAATGCCTCGGCGATATTCGGATT  
ATCCAGATGCTTTCACTATCTGAAATGCCATTTTCACTATTGGTTCCATTATTTCT  
CTCACAAGAATTATCTTTTTTTTTATTTATCTTATGAGAAAGGCTTTCTTCCCAACG  
TAAATCTTTGAGAACTTTAAATGTAACAACCTTCAATTGAATGGTTCAAGCCCTACC  
CCCTAGTG

JAB2

ATTATTAGACAAGAAAGGGGGGAAAAAAGAAGCTTTTGGACCTTAGGAATAATTTA  
TGCCATGATAGCTATCGGATTATTAGGATTCGTAGTTTGAGCTCACCATATATTT  
ACAGTAGATAGATGTAGATACCCGAGCTTACTTCACTTCAGCAACTATAATTATT  
GCGGTTCCAACACTGGGATTAAGTCTTTAGATGACTAGCCACCTTTCATGGAAC  
CAAATTTTAAATAGACCAGTAACCCTGTGAGCTTTAGGTTTTGTATTTTTATTTAC  
AGTAGGAGGATTAACAGGGGTAATTTAGCTAATTCTTCAATTGATATTATTCTTC  
ACGATACTTACTATGTAGTAGCTCATTTTCACTATGTTCTTTCTATAGGAGCTGTA  
TTTGCAATTATAGCCGGAATTGTCCAATGATTCCCATTTTACCGGACTAACCT  
TAAATAATTTTTTTTTAAAAACCCAATTTATTACTATATTTTTAGGTGTAAATTTAACA  
ATTTTTTCCCAACACTTTTTAGGGCTAAGAGGAATGCCTCGGCGATATTCGGAT  
TATCCAGATGCTTTCACTATCTGAAATGCCATTTTCACTATTGGTTCCATTATTTCT  
TCTCACAAGAATTATCTTTTTTTTTATTTATCTTATGAGAAAGGCTTTCTTCCCAAC  
GTAATCTTTGAGAACTTTAAATGTAACAACCTTCAATTGAATGGTTCAAGCCCTAC  
CCCCTAGTG

JAB4

ATTATTAGACAAGAAAGGGGGGAAAAAAGAAGCTTTTGGACCTTAGGAATAATTTA  
TGCCATGATAGCTATCGGATTATTAGGATTCGTAGTTTGAGCTCACCATATATTT  
ACAGTAGATAGATGTAGATACCCGAGCTTACTTCACTTCAGCAACTATAATTATT  
GCGGTTCCAACACTGGGATTAAGTCTTTAGATGACTAGCCACCTTTCATGGAAC  
CAAATTTTAAATAGACCAGTAACCCTGTGAGCTTTAGGTTTTGTATTTTTATTTAC  
AGTAGGAGGATTAACAGGGGTAATTTAGCTAATTCTTCAATTGATATTATTCTTC  
ACGATACTTACTATGTAGTAGCTCATTTTCACTATGTTCTTTCTATAGGAGCTGTA  
TTTGCAATTATAGCCGGAATTGTCCAATGATTCCCATTTTACCGGACTAACCT  
TAAATAATTTTTTTTTAAAAACCCAATTTATTACTATATTTTTAGGTGTAAATTTAACA  
ATTTTTTCCCAACACTTTTTAGGGCTAAGAGGAATGCCTCGGCGATATTCGGAT  
TATCCAGATGCTTTCACTATCTGAAATGCCATTTTCACTATTGGTTCCATTATTTCT  
TCTCACAAGAATTATCTTTTTTTTTATTTATCTTATGAGAAAGGCTTTCTTCCCAAC  
GTAATCTTTGAGAACTTTAAATGTAACAACCTTCAATTGAATGGTTCAAGCCCTAC  
CCCCTAGTG

LAV1

ATTATTAGACAAGAAAGGGGGGAAAAAAGAAGCTTTTGGACCTTAGGAATAATTTA  
TGCCATGATAGCTATCGGATTATTAGGATTCGTAGTTTGAGCTCACCATATATTT  
ACAGTAGATAGATGTAGATACCCGAGCTTACTTCACTTCAGCAACTATAATTATT  
GCGGTTCCAACACTGGGATTAAGTCTTTAGATGACTAGCCACCTTTCATGGAAC  
CAAATTTTAAATAGACCAGTAACCCTGTGAGCTTTAGGTTTTGTATTTTTATTTAC  
AGTAGGAGGATTAACAGGGGTAATTTAGCTAATTCTTCAATTGATATTATTCTTC



ACGATACTTACTATGTAGTAGCTCATTTTTCACTATGTTCTTTCTATAGGAGCTGTA  
TTTGCAATTATAGCCGGAATTGTCCAATGATTCCCATTATTTACCGGACTAACCT  
TAAATAATTTTTTTTTAAAAACCCAATTTATTACTATATTTTTAGGTGTAAATTTAAC  
ATTTTTTCCCCAACACTTTTTAGGGCTAAGAGGAATGCCTCGGCGATATTCGGAT  
TATCCAGATGCTTTCACTATCTGAAATGCCATTTTCATCTATTGGTTCCATTATTTCT  
TCTCACAAGAATTATCTTTTTTTTTATTTATCTTATGAGAAAGGCTTTCTTCCCAAC  
GTAATCTTTGAGAACTTTAAATGTAACAACCTTCAATTGAATGGTTCAAGCCCTAC  
CCCCTAGTG

LAV2

ATTATTAGACAAGAAAGGGGGGAAAAAAGAAGCTTTTGGACCTTAGGAATAATTTA  
TGCCATGATAGCTATCGGATTATTAGGATTCGTAGTTTGAGCTCACCATATATTT  
ACAGTAGATAGATGTAGATACCCGAGCTTACTTCACTTCAGCAACTATAATTATT  
GCGGTTCCAACCTGGGATTAAGTCTTTAGATGACTAGCCACCTTTCATGGAACCT  
CAAATTTTAAATAGACCAGTAACCCTGTGAGCTTTAGGTTTTGTATTTTTATTTAC  
AGTAGGAGGATTAACAGGGGTAATTTTAGCTAATTCTTCAATTGATATTATTCTTC  
ACGATACTTACTATGTAGTAGCTCATTTTTCACTATGTTCTTTCTATAGGAGCTGTA  
TTTGCAATTATAGCCGGAATTGTTCAATGATTCCCATTATTTACCGGACTAACCTT  
AAATAATTTTTTTTTAAAAACCCAATTTATTACTATATTTTTAGGTGTAAATTTAACA  
TTTTTTCCCCAACACTTTTTAGGGCTAAGAGGAATGCCTCGGCGATATTCGGATT  
ATCCAGATGCTTTCACTATCTGAAATGCCATTTTCATCTATTGGTTCCATTATTTCT  
CTCACAAGAATTATCTTTTTTTTTATTTATCTTATGAGAAAGGCTTTCTTCCCAACG  
TAAATCTTTGAGAACTTTAAATGTAACAACCTTCAATTGAATGGTTCAAGCCCTACC  
CCCTAGTG

MAC2

ATTATTAGACAAGAAAGGGGGGAAAAAAGAAGCTTTTGGACCTTAGGAATAATTTA  
TGCCATGATAGCTATCGGATTATTAGGATTCGTAGTTTGAGCTCACCATATATTT  
ACAGTAGATAGATGTAGATACCCGAGCTTACTTCACTTCAGCAACTATAATTATT  
GCGGTTCCAACCTGGGATTAAGTCTTTAGATGACTAGCCACCTTTCATGGAACCT  
CAAATTTTAAATAGACCAGTAACCCTGTGAGCTTTAGGTTTTGTATTTTTATTTAC  
AGTAGGAGGATTAACAGGGGTAATTTTAGCTAATTCTTCAATTGATATTATTCTTC  
ACGATACTTACTATGTAGTAGCTCATTTTTCACTATGTTCTTTCTATAGGAGCTGTA  
TTTGCAATTATAGCCGGAATTGTCCAATGATTCCCATTATTTACCGGACTAACCT  
TAAATAATTTTTTTTTAAAAACCCAATTTATTACTATATTTTTAGGTGTAAATTTAAC  
ATTTTTTCCCCAACACTTTTTAGGGCTAAGAGGAATGCCTCGGCGATATTCGGAT  
TATCCAGATGCTTTCACTATCTGAAATGCCATTTTCATCTATTGGTTCCATTATTTCT  
TCTCACAAGAATTATCTTTTTTTTTATTTATCTTATGAGAAAGGCTTTCTTCCCAAC  
GTAATCTTTGAGAACTTTAAATGTAACAACCTTCAATTGAATGGTTCAAGCCCTAC  
CCCCTAGTG

MAC4

ATTATTAGACAAGAAAGGGGGGAAAAAAGAAGCTTTTGGACCTTAGGAATAATTTA  
TGCCATGATAGCTATCGGATTATTAGGATTCGTAGTTTGAGCTCACCATATATTT  
ACAGTAGATAGATGTAGATACCCGAGCTTACTTCACTTCAGCAACTATAATTATT  
GCGGTTCCAACCTGGGATTAAGTCTTTAGATGACTAGCCACCTTTCATGGAACCT  
CAAATTTTAAATAGACCAGTAACCCTGTGAGCTTTAGGTTTTGTATTTTTATTTAC  
AGTAGGAGGATTAACAGGGGTAATTTTAGCTAATTCTTCAATTGATATTATTCTTC  
ACGATACTTACTATGTAGTAGCTCATTTTTCACTATGTTCTTTCTATAGGAGCTGTA  
TTTGCAATTATAGCCGGAATTGTCCAATGATTCCCATTATTTACCGGACTAACCT  
TAAATAATTTTTTTTTAAAAACCCAATTTATTACTATATTTTTAGGTGTAAATTTAAC  
ATTTTTTCCCCAACACTTTTTAGGGCTAAGAGGAATGCCTCGGCGATATTCGGAT  
TATCCAGATGCTTTCACTATCTGAAATGCCATTTTCATCTATTGGTTCCATTATTTCT

TCTCACAAGAATTATCTTTTTTTTTATTTATCTTATGAGAAAGGCTTTCTTCCCAAC  
GTAATCTTTGAGAACTTTAAATGTAACAACCTTCAATTGAATGGTTCAAGCCCTAC  
CCCCTAGTG

MAC6

ATTATTAGACAAGAAAGGGGGGAAAAAAGAAGCTTTTGGACCTTAGGAATAATTTA  
TGCCATGATAGCTATCGGATTATTAGGATTCGTAGTTTGAGCTCACCATATATTT  
ACAGTAGATAGATGTAGATACCCGAGCTTACTTCACTTCAGCAACTATAATTATT  
GCGGTTCCAACCTGGGATTAAGTCTTTAGATGACTAGCCACCTTTTCATGGAAC  
CAAATTTTAAATAGACCAGTAACCCTGTGAGCTTTAGGTTTTGTATTTTTATTTAC  
AGTAGGAGGATTAACAGGGGTAATTTAGCTAATTCTTCAATTGATATTATTCTTC  
ACGATACTTACTATGTAGTAGCTCATTTTCACTATGTTCTTTCTATAGGAGCTGTA  
TTTGCAATTATAGCCGGAATTGTCCAATGATTCCCATTATTTACCGGACTAACCT  
TAAATAATTTTTTTTTTAAAAACCCAATTTATTACTATATTTTTAGGTGTAAATTTAAC  
ATTTTTTCCCAACACTTTTTAGGGCTAAGAGGAATGCCTCGGCGATATTTCGGAT  
TATCCAGATGCTTTCACTATCTGAAATGCCATTTTCATCTATTGGTTCCATTATTT  
TCTCACAAGAATTATCTTTTTTTTTATTTATCTTATGAGAAAGGCTTTCTTCCCAAC  
GTAATCTTTGAGAACTTTAAATGTAACAACCTTCAATTGAATGGTTCAAGCCCTAC  
CCCCTAGTG

MAR2\_1

ATTATTAGACAAGAAAGGGGGGAAAAAAGAAGCTTTTGGACCTTAGGAATAATTTA  
TGCCATGATAGCTATCGGATTATTAGGATTCGTAGTTTGAGCTCACCATATATTT  
ACAGTAGATAGATGTAGATACCCGAGCTTACTTCACTTCAGCAACTATAATTATT  
GCGGTTCCAACCTGGGATTAAGTCTTTAGATGACTAGCCACCTTTTCATGGAAC  
CAAATTTTAAATAGACCAGTAACCCTGTGAGCTTTAGGTTTTGTATTTTTATTTAC  
AGTAGGAGGATTAACAGGGGTAATTTAGCTAATTCTTCAATTGATATTATTCTTC  
ACGATACTTACTATGTAGTAGCTCATTTTCACTATGTTCTTTCTATAGGAGCTGTA  
TTTGCAATTATAGCCGGAATTGTCCAATGATTCCCATTATTTACCGGACTAACCT  
TAAATAATTTTTTTTTTAAAAACCCAATTTATTACTATATTTTTAGGTGTAAATTTAAC  
ATTTTTTCCCAACACTTTTTAGGGCTAAGAGGAATGCCTCGGCGATATTTCGGAT  
TATCCAGATGCTTTCACTATCTGAAATGCCATTTTCATCTATTGGTTCCATTATTT  
TCTCACAAGAATTATCTTTTTTTTTATTTATCTTATGAGAAAGGCTTTCTTCCCAAC  
GTAATCTTTGAGAACTTTAAATGTAACAACCTTCAATTGAATGGTTCAAGCCCTAC  
CCCCTAGTG

MAR2\_2

ATTATTAGACAAGAAAGGGGGGAAAAAAGAAGCTTTTGGACCTTAGGAATAATTTA  
TGCCATGATAGCTATCGGATTATTAGGATTCGTAGTTTGAGCTCACCATATATTT  
ACAGTAGATAGATGTAGATACCCGAGCTTACTTCACTTCAGCAACTATAATTATT  
GCGGTTCCAACCTGGGATTAAGTCTTTAGATGACTAGCCACCTTTTCATGGAAC  
CAAATTTTAAATAGACCAGTAACCCTGTGAGCTTTAGGTTTTGTATTTTTATTTAC  
AGTAGGAGGATTAACAGGGGTAATTTAGCTAATTCTTCAATTGATATTATTCTTC  
ACGATACTTACTATGTAGTAGCTCATTTTCACTATGTTCTTTCTATAGGAGCTGTA  
TTTGCAATTATAGCCGGAATTGTCCAATGATTCCCATTATTTACCGGACTAACCT  
TAAATAATTTTTTTTTTAAAAACCCAATTTATTACTATATTTTTAGGTGTAAATTTAAC  
ATTTTTTCCCAACACTTTTTAGGGCTAAGAGGAATGCCTCGGCGATATTTCGGAT  
TATCCAGATGCTTTCACTATCTGAAATGCCATTTTCATCTATTGGTTCCATTATTT  
TCTCACAAGAATTATCTTTTTTTTTATTTATCTTATGAGAAAGGCTTTCTTCCCAAC  
GTAATCTTTGAGAACTTTAAATGTAACAACCTTCAATTGAATGGTTCAAGCCCTAC  
CCCCTAGTG

MAR3\_1

ATTATTAGACAAGAAAGGGGGGAAAAAAGAAGCTTTTGGACCTTAGGAATAATTTA

TGCCATGATAGCTATCGGATTATTAGGATTCGTAGTTTGAGCTCACCATATATTT  
ACAGTAGATAGATGTAGATACCCGAGCTTACTTCACTTCAGCAACTATAATTATT  
GCGGTTCCAACACTGGGATTAAGTCTTTAGATGACTAGCCACCTTTCATGGAAC  
CAAATTTTAAATAGACCAGTAACCCTGTGAGCTTTAGGTTTTGTATTTTTATTTAC  
AGTAGGAGGATTAACAGGGGTAATTTAGCTAATTCTTCAATTGATATTATTCTTC  
ACGATACTTACTATGTAGTAGCTCATTTTCACTATGTTCTTTCTATAGGAGCTGTA  
TTTGCAATTATAGCCGGAATTGTCCAATGATTCCCATTTTACCGGACTAACCT  
TAAATAATTTTTTTTTTAAAAACCCAATTTATTACTATATTTTTAGGTGTAAATTTAAC  
ATTTTTTCCCAACACTTTTTAGGGCTAAGAGGAATGCCTCGGCGATATTTCGGAT  
TATCCAGATGCTTTCCTATCTGAAATGCCATTTTCACTATTGGTTCCATTATTTTC  
TCTCACAAGAATTATCTTTTTTTTTATTTATCTTATGAGAAAGGCTTTCTTCCCAAC  
GTAATCTTTGAGAACTTTAAATGTAACAACCTTCAATTGAATGGTTCAAGCCCTAC  
CCCCTAGTG

MAR3\_2

ATTATTAGACAAGAAAGGGGGGAAAAAAGAAGCTTTTGGACCTTAGGAATAATTTA  
TGCCATGATAGCTATCGGATTATTAGGATTCGTAGTTTGAGCTCACCATATATTT  
ACAGTAGATAGATGTAGATACCCGAGCTTACTTCACTTCAGCAACTATAATTATT  
GCGGTTCCAACACTGGGATTAAGTCTTTAGATGACTAGCCACCTTTCATGGAAC  
CAAATTTTAAATAGACCAGTAACCCTGTGAGCTTTAGGTTTTGTATTTTTATTTAC  
AGTAGGAGGATTAACAGGGGTAATTTAGCTAATTCTTCAATTGATATTATTCTTC  
ACGATACTTACTATGTAGTAGCTCATTTTCACTATGTTCTTTCTATAGGAGCTGTA  
TTTGCAATTATAGCCGGAATTGTCCAATGATTCCCATTTTACCGGACTAACCT  
TAAATAATTTTTTTTTTAAAAACCCAATTTATTACTATATTTTTAGGTGTAAATTTAAC  
ATTTTTTCCCAACACTTTTTAGGGCTAAGAGGAATGCCTCGGCGATATTTCGGAT  
TATCCAGATGCTTTCCTATCTGAAATGCCATTTTCACTATTGGTTCCATTATTTTC  
TCTCACAAGAATTATCTTTTTTTTTATTTATCTTATGAGAAAGGCTTTCTTCCCAAC  
GTAATCTTTGAGAACTTTAAATGTAACAACCTTCAATTGAATGGTTCAAGCCCTAC  
CCCCTAGTG

MOC1

ATTATTAGACAAGAAAGGGGGGAAAAAAGAAGCTTTTGGACCTTAGGAATAATTTA  
TGCCATGATAGCTATCGGATTATTAGGATTCGTAGTTTGAGCTCACCATATATTT  
ACAGTAGATAGATGTAGATACCCGAGCTTACTTCACTTCAGCAACTATAATTATT  
GCGGTTCCAACACTGGGATTAAGTCTTTAGATGACTAGCCACCTTTCATGGAAC  
CAAATTTTAAATAGACCAGTAACCCTGTGAGCTTTAGGTTTTGTATTTTTATTTAC  
AGTAGGAGGATTAACAGGGGTAATTTAGCTAATTCTTCAATTGATATTATTCTTC  
ACGATACTTACTATGTAGTAGCTCATTTTCACTATGTTCTTTCTATAGGAGCTGTA  
TTTGCAATTATAGCCGGAATTGTCCAATGATTCCCATTTTACCGGACTAACCT  
TAAATAATTTTTTTTTTAAAAACCCAATTTATTACTATATTTTTAGGTGTAAATTTAAC  
ATTTTTTCCCAACACTTTTTAGGGCTAAGAGGAATGCCTCGGCGATATTTCGGAT  
TATCCAGATGCTTTCCTATCTGAAATGCCATTTTCACTATTGGTTCCATTATTTTC  
TCTCACAAGAATTATCTTTTTTTTTATTTATCTTATGAGAAAGGCTTTCTTCCCAAC  
GTAATCTTTGAGAACTTTAAATGTAACAACCTTCAATTGAATGGTTCAAGCCCTAC  
CCCCTAGTG

MOC2

ATTATTAGACAAGAAAGGGGGGAAAAAAGAAGCTTTTGGACCTTAGGAATAATTTA  
TGCCATGATAGCTATCGGATTATTAGGATTCGTAGTTTGAGCTCACCATATATTT  
ACAGTAGATAGATGTAGATACCCGAGCTTACTTCACTTCAGCAACTATAATTATT  
GCGGTTCCAACACTGGGATTAAGTCTTTAGATGACTAGCCACCTTTCATGGAAC  
CAAATTTTAAATAGACCAGTAACCCTGTGAGCTTTAGGTTTTGTATTTTTATTTAC  
AGTAGGAGGATTAACAGGGGTAATTTAGCTAATTCTTCAATTGATATTATTCTTC

ACGATACTTACTATGTAGTAGCTCATTTTTCACTATGTTCTTTCTATAGGAGCTGTA  
TTTGCAATTATAGCCGGAATTGTCCAATGATTCCCATTATTTACCGGACTAACCT  
TAAATAATTTTTTTTTTAAAAACCCAATTTATTACTATATTTTTAGGTGTAAATTTAAC  
ATTTTTTCCCCAACACTTTTTAGGGCTAAGAGGAATGCCTCGGCGATATTCCGGAT  
TATCCAGATGCTTTCACTATCTGAAATGCCATTTTCATCTATTGGTTCCATTATTTTC  
TCTCACAAGAATTATCTTTTTTTTTATTTATCTTATGAGAAAGGCTTTCTTCCCAAC  
GTAATCTTTGAGAACTTTAAATGTAACAACCTTCAATTGAATGGTTCAAGCCCTAC  
CCCCTAGTG

MOC2\_0

ATTATTAGACAAGAAAGGGGGGAAAAAAGAAGCTTTTGGACCTTAGGAATAATTTA  
TGCCATGATAGCTATCGGATTATTAGGATTCGTAGTTTGAGCTCACCATATATTT  
ACAGTAGATAGATGTAGATACCCGAGCTTACTTCACTTCAGCAACTATAATTATT  
GCGGTTCCAACCTGGGATTAAGTCTTTAGATGACTAGCCACCTTTTCATGGAACCT  
CAAATTTTAAATAGACCAGTAACCCTGTGAGCTTTAGGTTTTGTATTTTTATTTAC  
AGTAGGAGGATTAACAGGGGTAATTTTAGCTAATTCTTCAATTGATATTATTCTTC  
ACGATACTTACTATGTAGTAGCTCATTTTTCACTATGTTCTTTCTATAGGAGCTGTA  
TTTGCAATTATAGCCGGAATTGTCCAATGATTCCCATTATTTACCGGACTAACCT  
TAAATAATTTTTTTTTTAAAAACCCAATTTATTACTATATTTTTAGGTGTAAATTTAAC  
ATTTTTTCCCCAACACTTTTTAGGGCTAAGAGGAATGCCTCGGCGATATTCCGGAT  
TATCCAGATGCTTTCACTATCTGAAATGCCATTTTCATCTATTGGTTCCATTATTTTC  
TCTCACAAGAATTATCTTTTTTTTTATTTATCTTATGAGAAAGGCTTTCTTCCCAAC  
GTAATCTTTGAGAACTTTAAATGTAACAACCTTCAATTGAATGGTTCAAGCCCTAC  
CCCCTAGTG

MOC2\_1

ATTATTAGACAAGAAAGGGGGGAAAAAAGAAGCTTTTGGACCTTAGGAATAATTTA  
TGCCATGATAGCTATCGGATTATTAGGATTCGTAGTTTGAGCTCACCATATATTT  
ACAGTAGATAGATGTAGATACCCGAGCTTACTTCACTTCAGCAACTATAATTATT  
GCGGTTCCAACCTGGGATTAAGTCTTTAGATGACTAGCCACCTTTTCATGGAACCT  
CAAATTTTAAATAGACCAGTAACCCTGTGAGCTTTAGGTTTTGTATTTTTATTTAC  
AGTAGGAGGATTAACAGGGGTAATTTTAGCTAATTCTTCAATTGATATTATTCTTC  
ACGATACTTACTATGTAGTAGCTCATTTTTCACTATGTTCTTTCTATAGGAGCTGTA  
TTTGCAATTATAGCCGGAATTGTCCAATGATTCCCATTATTTACCGGACTAACCT  
TAAATAATTTTTTTTTTAAAAACCCAATTTATTACTATATTTTTAGGTGTAAATTTAAC  
ATTTTTTCCCCAACACTTTTTAGGGCTAAGAGGAATGCCTCGGCGATATTCCGGAT  
TATCCAGATGCTTTCACTATCTGAAATGCCATTTTCATCTATTGGTTCCATTATTTTC  
TCTCACAAGAATTATCTTTTTTTTTATTTATCTTATGAGAAAGGCTTTCTTCCCAAC  
GTAATCTTTGAGAACTTTAAATGTAACAACCTTCAATTGAATGGTTCAAGCCCTAC  
CCCCTAGTG

MOC3

ATTATTAGACAAGAAAGGGGGGAAAAAAGAAGCTTTTGGACCTTAGGAATAATTTA  
TGCCATGATAGCTATCGGATTATTAGGATTCGTAGTTTGAGCTCACCATATATTT  
ACAGTAGATAGATGTAGATACCCGAGCTTACTTCACTTCAGCAACTATAATTATT  
GCGGTTCCAACCTGGGATTAAGTCTTTAGATGACTAGCCACCTTTTCATGGAACCT  
CAAATTTTAAATAGACCAGTAACCCTGTGAGCTTTAGGTTTTGTATTTTTATTTAC  
AGTAGGAGGATTAACAGGGGTAATTTTAGCTAATTCTTCAATTGATATTATTCTTC  
ACGATACTTACTATGTAGTAGCTCATTTTTCACTATGTTCTTTCTATAGGAGCTGTA  
TTTGCAATTATAGCCGGAATTGTCCAATGATTCCCATTATTTACCGGACTAACCT  
TAAATAATTTTTTTTTTAAAAACCCAATTTATTACTATATTTTTAGGTGTAAATTTAAC  
ATTTTTTCCCCAACACTTTTTAGGGCTAAGAGGAATGCCTCGGCGATATTCCGGAT  
TATCCAGATGCTTTCACTATCTGAAATGCCATTTTCATCTATTGGTTCCATTATTTTC

TCTCACAAGAATTATCTTTTTTTTTATTTATCTTATGAGAAAGGCTTTCTTCCCAAC  
GTAATCTTTGAGAACTTTAAATGTAACAACCTTCAATTGAATGGTTCAAGCCCTAC  
CCCCTAGTG

MOC4

ATTATTAGACAAGAAAGGGGGGAAAAAAGAAGCTTTTGGACCTTAGGAATAATTTA  
TGCCATGATAGCTATCGGATTATTAGGATTCGTAGTTTGAGCTCACCATATATTT  
ACAGTAGATAGATGTAGATACCCGAGCTTACTTCACTTCAGCAACTATAATTATT  
GCGGTTCCAACCTGGGATTAAGTCTTTAGATGACTAGCCACCTTTTCATGGAAC  
CAAATTTTAAATAGACCAGTAACCCTGTGAGCTTTAGGTTTTGTATTTTTATTTAC  
AGTAGGAGGATTAACAGGGGTAATTTAGCTAATTCTTCAATTGATATTATTCTTC  
ACGATACTTACTATGTAGTAGCTCATTTTCACTATGTTCTTTCTATAGGAGCTGTA  
TTTGCAATTATAGCCGGAATTGTCCAATGATTCCCATTATTTACCGGACTAACCT  
TAAATAATTTTTTTTTTAAAACCCAATTTATTACTATATTTTTAGGTGTAAATTTAAC  
ATTTTTTCCCAACACTTTTTAGGGCTAAGAGGAATGCCTCGGCGATATTTCGGAT  
TATCCAGATGCTTTCACTATCTGAAATGCCATTTTCATCTATTGGTTCCATTATTT  
TCTCACAAGAATTATCTTTTTTTTTATTTATCTTATGAGAAAGGCTTTCTTCCCAAC  
GTAATCTTTGAGAACTTTAAATGTAACAACCTTCAATTGAATGGTTCAAGCCCTAC  
CCCCTAGTG

moc5

ATTATTAGACAAGAAAGGGGGGAAAAAAGAAGCTTTTGGACCTTAGGAATAATTTA  
TGCCATGATAGCTATCGGATTATTAGGATTCGTAGTTTGAGCTCACCATATATTT  
ACAGTAGATAGATGTAGATACCCGAGCTTACTTCACTTCAGCAACTATAATTATT  
GCGGTTCCAACCTGGGATTAAGTCTTTAGATGACTAGCCACCTTTTCATGGAAC  
CAAATTTTAAATAGACCAGTAACCCTGTGAGCTTTAGGTTTTGTATTTTTATTTAC  
AGTAGGAGGATTAACAGGGGTAATTTAGCTAATTCTTCAATTGATATTATTCTTC  
ACGATACTTACTATGTAGTAGCTCATTTTCACTATGTTCTTTCTATAGGAGCTGTA  
TTTGCAATTATAGCCGGAATTGTCCAATGATTCCCATTATTTACCGGACTAACCT  
TAAATAATTTTTTTTTTAAAACCCAATTTATTACTATATTTTTAGGTGTAAATTTAAC  
ATTTTTTCCCAACACTTTTTAGGGCTAAGAGGAATGCCTCGGCGATATTTCGGAT  
TATCCAGATGCTTTCACTATCTGAAATGCCATTTTCATCTATTGGTTCCATTATTT  
TCTCACAAGAATTATCTTTTTTTTTATTTATCTTATGAGAAAGGCTTTCTTCCCAAC  
GTAATCTTTGAGAACTTTAAATGTAACAACCTTCAATTGAATGGTTCAAGCCCTAC  
CCCCTAGTG

pit1

ATTATTAGACAAGAAAGGGGGGAAAAAAGAAGCTTTTGGACCTTAGGAATAATTTA  
TGCCATGATAGCTATCGGATTATTAGGATTCGTAGTTTGAGCTCACCATATATTT  
ACAGTAGATAGATGTAGATACCCGAGCTTACTTCACTTCAGCAACTATAATTATC  
GCGGTTCCAACCTGGGATTAAGTCTTTAGGTGACTAGCCACCTTTTCATGGAAC  
CAAATTTTAAATAGACCAGTAACCCTGTGAGCTTTAGGTTTTGTATTTTTATTTAC  
AGTAGGAGGATTAACAGGGGTAATTTAGCTAATTCTTCAATTGATATTATTCTTC  
ACGATACTTACTATGTAGTAGCTCATTTTCACTATGTTCTTTCTATAGGAGCTGTA  
TTTGCAATTATAGCCGGAATTGTCCAATGATTCCCATTATTTACTGGACTAACCTT  
AAATAATTTTTTTTTTAAAACCCAATTTATTACTATATTTTTAGGTGTAAATTTAAC  
TTTTTTCCTCAACACTTTTTAGGGCTAAGAGGAATGCCTCGGCGATATTTCGGATT  
ATCCAGATGCTTTCACTATCTGAAATGCCATTTTCATCTATTGGTTCCATTATTTCT  
CTCACAAGAATTATCTTTTTTTTTATTTATCTTATGAGAAAGGCTTTCTTCCCAACG  
TAAATCTTTGAGAACTTTAAATGTAACAACCTTCAATTGAATGGTTCAAGCCCTACC  
CCCTAGTG

PIT1\_1

ATTATTAGACAAGAAAGGGGGGAAAAAAGAAGCTTTTGGACCTTAGGAATAATTTA

TGCCATGATAGCTATCGGATTATTAGGATTCGTAGTTTGAGCTCACCATATATTT  
ACAGTAGATAGATGTAGATACCCGAGCTTACTTCACTTCAGCAACTATAATTATC  
GCGGTTCCAACACTGGGATTAAGTCTTTAGGTGACTAGCCACCTTTCATGGAAC  
CAAATTTTAAATAGACCAGTAACCCTGTGAGCTTTAGGTTTTGTATTTTTATTTAC  
AGTAGGAGGATTAACAGGGGTAATTTAGCTAATTCTTCAATTGATATTATTCTTC  
ACGATACTTACTATGTAGTAGCTCATTTTCACTATGTTCTTTCTATAGGAGCTGTA  
TTTGCAATTATAGCCGGAATTGTCCAATGATTCCCATTATTTACTGGACTAACCTT  
AAATAATTTTTTTTTTAAAAACCCAATTTATTACTATATTTTTAGGTGTAAATTTAACA  
TTTTTTCCTCAACACTTTTTAGGGCTAAGAGGAATGCCTCGGCGATATTCGGATT  
ATCCAGATGCTTTCACTATCTGAAATGCCATTTTCATCTATTGGTTCATTATTTCT  
CTCACAAGAATTATCTTTTTTTTTATTTATCTTATGAGAAAGGCTTTCTTCCCAACG  
TAAATCTTTGAGAACTTTAAATGTAACAACCTTCAATTGAATGGTTCAGCCCTACC  
CCCTAGTG

PIT1\_2

ATTATTAGACAAGAAAGGGGGGAAAAAAGAAGCTTTTGGACCTTAGGAATAATTTA  
TGCCATGATAGCTATCGGATTATTAGGATTCGTAGTTTGAGCTCACCATATATTT  
ACAGTAGATAGATGTAGATACCCGAGCTTACTTCACTTCAGCAACTATAATTATT  
GCGGTTCCAACACTGGGATTAAGTCTTTAGATGACTAGCCACCTTTCATGGAAC  
CAAATTTTAAATAGACCAGTAACCCTGTGAGCTTTAGGTTTTGTATTTTTATTTAC  
AGTAGGAGGATTAACAGGGGTAATTTAGCTAATTCTTCAATTGATATTATTCTTC  
ACGATACTTACTATGTAGTAGCTCATTTTCACTATGTTCTTTCTATAGGAGCTGTA  
TTTGCAATTATAGCCGGAATTGTCCAATGATTCCCATTATTTACTGGACTAACCTT  
AAATAATTTTTTTTTTAAAAACCCAATTTATTACTATATTTTTAGGTGTAAATTTAACA  
TTTTTTCCTCAACACTTTTTAGGGCTAAGAGGAATGCCTCGGCGATATTCGGATT  
ATCCAGATGCTTTCACTATCTGAAATGCCATTTTCATCTATTGGTTCATTATTTCT  
CTCACAAGAATTATCTTTTTTTTTATTTATCTTATGAGAAAGGCTTTCTTCCCAACG  
TAAATCTTTGAGAACTTTAAATGTAACAACCTTCAATTGAATGGTTCAGCCCTACC  
CCCTAGTG

pit2

ATTATTAGACAAGAAAGGGGGGAAAAAAGAAGCTTTTGGACCTTAGGAATAATTTA  
TGCCATGATAGCTATCGGATTATTAGGATTCGTAGTTTGAGCTCACCATATATTT  
ACAGTAGATAGATGTAGATACCCGAGCTTACTTCACTTCAGCAACTATAATTATC  
GCGGTTCCAACACTGGGATTAAGTCTTTAGGTGACTAGCCACCTTTCATGGAAC  
CAAATTTTAAATAGACCAGTAACCCTGTGAGCTTTAGGTTTTGTATTTTTATTTAC  
AGTAGGAGGATTAACAGGGGTAATTTAGCTAATTCTTCAATTGATATTATTCTTC  
ACGATACTTACTATGTAGTAGCTCATTTTCACTATGTTCTTTCTATAGGAGCTGTA  
TTTGCAATTATAGCCGGAATTGTCCAATGATTCCCATTATTTACTGGACTAACCTT  
AAATAATTTTTTTTTTAAAAACCCAATTTATTACTATATTTTTAGGTGTAAATTTAACA  
TTTTTTCCTCAACACTTTTTAGGGCTAAGAGGAATGCCTCGGCGATATTCGGATT  
ATCCAGATGCTTTCACTATCTGAAATGCCATTTTCATCTATTGGTTCATTATTTCT  
CTCACAAGAATTATCTTTTTTTTTATTTATCTTATGAGAAAGGCTTTCTTCCCAACG  
TAAATCTTTGAGAACTTTAAATGTAACAACCTTCAATTGAATGGTTCAGCCCTACC  
CCCTAGTG

pit4

ATTATTAGACAAGAAAGGGGGGAAAAAAGAAGCTTTTGGACCTTAGGAATAATTTA  
TGCCATGATAGCTATCGGATTATTAGGATTCGTAGTTTGAGCTCACCATATATTT  
ACAGTAGATAGATGTAGATACCCGAGCTTACTTCACTTCAGCAACTATAATTATT  
GCGGTTCCAACACTGGGATTAAGTCTTTAGATGACTAGCCACCTTTCATGGAAC  
CAAATTTTAAATAGACCAGTAACCCTGTGAGCTTTAGGTTTTGTATTTTTATTTAC  
AGTAGGAGGATTAACAGGGGTAATTTAGCTAATTCTTCAATTGATATTATTCTTC

ACGATACTTACTATGTAGTAGCTCATTTTTCACTATGTTCTTTCTATAGGAGCTGTA  
TTTGCAATTATAGCCGGAATTGTCCAATGATTCCCATTATTTACTGGACTAACCTT  
AAATAATTTTTTTTTAAAAACCCAATTTATTACTATATTTTTAGGTGTAAATTTAACA  
TTTTTTCCTCAACACTTTTTAGGGCTAAGAGGAATGCCTCGGCGATATTCGGATT  
ATCCAGATGCTTTCCTACTATCTGAAATGCCATTTTCATCTATTGGTTCCATTATTTCT  
CTCACAAGAATTATCTTTTTTTTTATTTATCTTATGAGAAAGGCTTTCTTCCCAACG  
TAAATCTTTGAGAACTTTAAATGTAACAACCTTCAATTGAATGGTTCAAGCCCTACC  
CCCTAGTG

RON1

ATTATTAGACAAGAAAGGGGGGAAAAAGAAGCTTTTGGACCTTAGGAATAATTTA  
TGCCATGATAGCTATCGGATTATTAGGATTCGTAGTTTGAGCTCACCATATATTT  
ACAGTAGATAGATGTAGATACCCGAGCTTACTTCACTTCAGCAACTATAATTATT  
GCGGTTCCAACACTGGGATTAAGTCTTTAGATGACTAGCCACCTTTCATGGAACCT  
CAAATTTTAAATAGACCAGTAACCCTGTGAGCTTTAGGTTTTGTATTTTTATTTAC  
AGTAGGAGGATTAACAGGGGTAATTTTAGCTAATTCTTCAATTGATATTATTCTTC  
ACGATACTTACTATGTAGTAGCTCATTTTTCACTATGTTCTTTCTATAGGAGCTGTA  
TTTGCAATTATAGCCGGAATTGTCCAATGATTCCCATTATTTACCGGACTAACCT  
TAAATAATTTTTTTTTAAAAACCCAATTTATTACTATATTTTTAGGTGTAAATTTAAC  
ATTTTTTCCCAACACTTTTTAGGGCTAAGAGGAATGCCTCGGCGATATTCGGAT  
TATCCAGATGCTTTCCTACTATCTGAAATGCCATTTTCATCTATTGGTTCCATTATTTCT  
TCTCACAAGAATTATCTTTTTTTTTATTTATCTTATGAGAAAGGCTTTCTTCCCAAC  
GTAATCTTTGAGAACTTTAAATGTAACAACCTTCAATTGAATGGTTCAAGCCCTAC  
CCCCTAGTG

RON2

ATTATTAGACAAGAAAGGGGGGAAAAAGAAGCTTTTGGACCTTAGGAATAATTTA  
TGCCATGATAGCTATCGGATTATTAGGATTCGTAGTTTGAGCTCACCATATATTT  
ACAGTAGATAGATGTAGATACCCGAGCTTACTTCACTTCAGCAACTATAATTATT  
GCGGTTCCAACACTGGGATTAAGTCTTTAGATGACTAGCCACCTTTCATGGAACCT  
CAAATTTTAAATAGACCAGTAACCCTGTGAGCTTTAGGTTTTGTATTTTTATTTAC  
AGTAGGAGGATTAACAGGGGTAATTTTAGCTAATTCTTCAATTGATATTATTCTTC  
ACGATACTTACTATGTAGTAGCTCATTTTTCACTATGTTCTTTCTATAGGAGCTGTA  
TTTGCAATTATAGCCGGAATTGTCCAATGATTCCCATTATTTACCGGACTAACCT  
TAAATAATTTTTTTTTAAAAACCCAATTTATTACTATATTTTTAGGTGTAAATTTAAC  
ATTTTTTCCCAACACTTTTTAGGGCTAAGAGGAATGCCTCGGCGATATTCGGAT  
TATCCAGATGCTTTCCTACTATCTGAAATGCCATTTTCATCTATTGGTTCCATTATTTCT  
TCTCACAAGAATTATCTTTTTTTTTATTTATCTTATGAGAAAGGCTTTCTTCCCAAC  
GTAATCTTTGAGAACTTTAAATGTAACAACCTTCAATTGAATGGTTCAAGCCCTAC  
CCCCTAGTG

ron3

ATTATTAGACAAGAAAGGGGGGAAAAAGAAGCTTTTGGACCTTAGGAATAATTTA  
TGCCATGATAGCTATCGGATTATTAGGATTCGTAGTTTGAGCTCACCATATATTT  
ACAGTAGATAGATGTAGATACCCGAGCTTACTTCACTTCAGCAACTATAATTATT  
GCGGTTCCAACACTGGGATTAAGTCTTTAGATGACTAGCCACCTTTCATGGAACCT  
CAAATTTTAAATAGACCAGTAACCCTGTGAGCTTTAGGTTTTGTATTTTTATTTAC  
AGTAGGAGGATTAACAGGGGTAATTTTAGCTAATTCTTCAATTGATATTATTCTTC  
ACGATACTTACTATGTAGTAGCTCATTTTTCACTATGTTCTTTCTATAGGAGCTGTA  
TTTGCAATTATAGCCGGAATTGTCCAATGATTCCCATTATTTACCGGACTAACCT  
TAAATAATTTTTTTTTAAAAACCCAATTTATTACTATATTTTTAGGTGTAAATTTAAC  
ATTTTTTCCCAACACTTTTTAGGGCTAAGAGGAATGCCTCGGCGATATTCGGAT  
TATCCAGATGCTTTCCTACTATCTGAAATGCCATTTTCATCTATTGGTTCCATTATTTCT

TCTCACAAGAATTATCTTTTTTTTTATTTATCTTATGAGAAAGGCTTTCTTCCCAAC  
GTAATCTTTGAGAACTTTAAATGTAACAACCTTCAATTGAATGGTTCAAGCCCTAC  
CCCCTAGTG

RON4

ATTATTAGACAAGAAAGGGGGAAAAAAGAAGCTTTTGGACCTTAGGAATAATTTA  
TGCCATGATAGCTATCGGATTATTAGGATTCGTAGTTTGAGCTCACCATATATTT  
ACAGTAGATAGATGTAGATACCCGAGCTTACTTCACTTCAGCAACTATAATTATT  
GCGGTTCCAACCTGGGATTAAGTCTTTAGATGACTAGCCACCTTTTCATGGAACCT  
CAAATTTTAAATAGACCAGTAACCCTGTGAGCTTTAGGTTTTGTATTTTTATTTAC  
AGTAGGAGGATTAACAGGGGTAATTTAGCTAATTCTTCAATTGATATTATTCTTC  
ACGATACTTACTATGTAGTAGCTCATTTTCACTATGTTCTTTCTATAGGAGCTGTA  
TTTGCAATTATAGCCGGAATTGTCCAATGATTCCCATTATTTACCGGACTAACCT  
TAAATAATTTTTTTTTTAAAAACCCAATTTATTACTATATTTTTAGGTGTAAATTTAAC  
ATTTTTTCCCAACACTTTTTAGGGCTAAGAGGAATGCCTCGGCGATATTTCGGAT  
TATCCAGATGCTTTCACTATCTGAAATGCCATTTTCATCTATTGGTTCCATTATTTTC  
TCTCACAAGAATTATCTTTTTTTTTATTTATCTTATGAGAAAGGCTTTCTTCCCAAC  
GTAATCTTTGAGAACTTTAAATGTAACAACCTTCAATTGAATGGTTCAAGCCCTAC  
CCCCTAGTG

RON7

ATTATTAGACAAGAAAGGGGGAAAAAAGAAGCTTTTGGACCTTAGGAATAATTTA  
TGCCATGATAGCTATCGGATTATTAGGATTCGTAGTTTGAGCTCACCATATATTT  
ACAGTAGATAGATGTAGATACCCGAGCTTACTTCACTTCAGCAACTATAATTATT  
GCGGTTCCAACCTGGGATTAAGTCTTTAGATGACTAGCCACCTTTTCATGGAACCT  
CAAATTTTAAATAGACCAGTAACCCTGTGAGCTTTAGGTTTTGTATTTTTATTTAC  
AGTAGGAGGATTAACAGGGGTAATTTAGCTAATTCTTCAATTGATATTATTCTTC  
ACGATACTTACTATGTAGTAGCTCATTTTCACTATGTTCTTTCTATAGGAGCTGTA  
TTTGCAATTATAGCCGGAATTGTCCAATGATTCCCATTATTTACCGGACTAACCT  
TAAATAATTTTTTTTTTAAAAACCCAATTTATTACTATATTTTTAGGTGTAAATTTAAC  
ATTTTTTCCCAACACTTTTTAGGGCTAAGAGGAATGCCTCGGCGATATTTCGGAT  
TATCCAGATGCTTTCACTATCTGAAATGCCATTTTCATCTATTGGTTCCATTATTTTC  
TCTCACAAGAATTATCTTTTTTTTTATTTATCTTATGAGAAAGGCTTTCTTCCCAAC  
GTAATCTTTGAGAACTTTAAATGTAACAACCTTCAATTGAATGGTTCAAGCCCTAC  
CCCCTAGTG

SGO1

ATTATTAGACAAGAAAGGGGGAAAAAAGAAGCTTTTGGACCTTAGGAATAATTTA  
TGCCATGATAGCTATCGGATTATTAGGATTCGTAGTTTGAGCTCACCATATATTT  
ACAGTAGATAGATGTAGATACCCGAGCTTACTTCACTTCAGCAACTATAATTATT  
GCGGTTCCAACCTGGGATTAAGTCTTTAGATGACTAGCCACCTTTTCATGGAACCT  
CAAATTTTAAATAGACCAGTAACCCTGTGAGCTTTAGGTTTTGTATTTTTATTTAC  
AGTAGGAGGATTAACAGGGGTAATTTAGCTAATTCTTCAATTGATATTATTCTTC  
ACGATACTTACTATGTAGTAGCTCATTTTCACTATGTTCTTTCTATAGGAGCTGTA  
TTTGCAATTATAGCCGGAATTGTCCAATGATTCCCATTATTTACCGGACTAACCT  
TAAATAATTTTTTTTTTAAAAACCCAATTTATTACTATATTTTTAGGTGTAAATTTAAC  
ATTTTTTCCCAACACTTTTTAGGGCTAAGAGGAATGCCTCGGCGATATTTCGGAT  
TATCCAGATGCTTTCACTATCTGAAATGCCATTTTCATCTATTGGTTCCATTATTTTC  
TCTCACAAGAATTATCTTTTTTTTTATTTATCTTATGAGAAAGGCTTTCTTCCCAAC  
GTAATCTTTGAGAACTTTAAATGTAACAACCTTCAATTGAATGGTTCAAGCCCTAC  
CCCCTAGTG

SGO2

ATTATTAGACAAGAAAGGGGGAAAAAAGAAGCTTTTGGACCTTAGGAATAATTTA



TGCCATGATAGCTATCGGATTATTAGGATTCGTAGTTTGAGCTCACCATATATTT  
ACAGTAGATAGATGTAGATACCCGAGCTTACTTCACTTCAGCAACTATAATTATT  
GCGGTTCCAACACTGGGATTAAGTCTTTAGATGACTAGCCACCTTTCATGGAAC  
CAAATTTTAAATAGACCAGTAACCCTGTGAGCTTTAGGTTTTGTATTTTTATTTAC  
AGTAGGAGGATTAACAGGGGTAATTTAGCTAATTCTTCAATTGATATTATTCTTC  
ACGATACTTACTATGTAGTAGCTCATTTTCACTATGTTCTTTCTATAGGAGCTGTA  
TTTGCAATTATAGCCGGAATTGTCCAATGATTCCCATTTTACCGGACTAACCT  
TAAATAATTTTTTTTTTAAAAACCCAATTTATTACTATATTTTTAGGTGTAAATTTAAC  
ATTTTTTCCCAACACTTTTTAGGGCTAAGAGGAATGCCTCGGCGATATTTCGGAT  
TATCCAGATGCTTTCCTATCTGAAATGCCATTTTCACTATTGGTTCCATTATTTTC  
TCTCACAAGAATTATCTTTTTTTTTATTTATCTTATGAGAAAGGCTTTCTTCCCAAC  
GTAATCTTTGAGAACTTTAAATGTAACAACCTTCAATTGAATGGTTCAAGCCCTAC  
CCCCTAGTG

SJA12

ATTATTAGACAAGAAAGGGGGGAAAAAAGAAGCTTTTGGACCTTAGGAATAATTTA  
TGCCATGATAGCTATCGGATTATTAGGATTCGTAGTTTGAGCTCACCATATATTT  
ACAGTAGATAGATGTAGATACCCGAGCTTACTTCACTTCAGCAACTATAATTATT  
GCGGTTCCAACACTGGGATTAAGTCTTTAGATGACTAGCCACCTTTCATGGAAC  
CAAATTTTAAATAGACCAGTAACCCTGTGAGCTTTAGGTTTTGTATTTTTATTTAC  
AGTAGGAGGATTAACAGGGGTAATTTAGCTAATTCTTCAATTGATATTATTCTTC  
ACGATACTTACTATGTAGTAGCTCATTTTCACTATGTTCTTTCTATAGGAGCTGTA  
TTTGCAATTATAGCCGGAATTGTCCAATGATTCCCATTTTACCGGACTAACCT  
TAAATAATTTTTTTTTTAAAAACCCAATTTATTACTATATTTTTAGGTGTAAATTTAAC  
ATTTTTTCCCAACACTTTTTAGGGCTAAGAGGAATGCCTCGGCGATATTTCGGAT  
TATCCAGATGCTTTCCTATCTGAAATGCCATTTTCACTATTGGTTCCATTATTTTC  
TCTCACAAGAATTATCTTTTTTTTTATTTATCTTATGAGAAAGGCTTTCTTCCCAAC  
GTAATCTTTGAGAACTTTAAATGTAACAACCTTCAATTGAATGGTTCAAGCCCTAC  
CCCCTAGTG

SJA13

ATTATTAGACAAGAAAGGGGGGAAAAAAGAAGCTTTTGGACCTTAGGAATAATTTA  
TGCCATGATAGCTATCGGATTATTAGGATTCGTAGTTTGAGCTCACCATATATTT  
ACAGTAGATAGATGTAGATACCCGAGCTTACTTCACTTCAGCAACTATAATTATT  
GCGGTTCCAACACTGGGATTAAGTCTTTAGATGACTAGCCACCTTTCATGGAAC  
CAAATTTTAAATAGACCAGTAACCCTGTGAGCTTTAGGTTTTGTATTTTTATTTAC  
AGTAGGAGGATTAACAGGGGTAATTTAGCTAATTCTTCAATTGATATTATTCTTC  
ACGATACTTACTATGTAGTAGCTCATTTTCACTATGTTCTTTCTATAGGAGCTGTA  
TTTGCAATTATAGCCGGAATTGTCCAATGATTCCCATTTTACCGGACTAACCT  
TAAATAATTTTTTTTTTAAAAACCCAATTTATTACTATATTTTTAGGTGTAAATTTAAC  
ATTTTTTCCCAACACTTTTTAGGGCTAAGAGGAATGCCTCGGCGATATTTCGGAT  
TATCCAGATGCTTTCCTATCTGAAATGCCATTTTCACTATTGGTTCCATTATTTTC  
TCTCACAAGAATTATCTTTTTTTTTATTTATCTTATGAGAAAGGCTTTCTTCCCAAC  
GTAATCTTTGAGAACTTTAAATGTAACAACCTTCAATTGAATGGTTCAAGCCCTAC  
CCCCTAGTG

SJA14

ATTATTAGACAAGAAAGGGGGGAAAAAAGAAGCTTTTGGACCTTAGGAATAATTTA  
TGCCATGATAGCTATCGGATTATTAGGATTCGTAGTTTGAGCTCACCATATATTT  
ACAGTAGATAGATGTAGATACCCGAGCTTACTTCACTTCAGCAACTATAATTATT  
GCGGTTCCAACACTGGGATTAAGTCTTTAGATGACTAGCCACCTTTCATGGAAC  
CAAATTTTAAATAGACCAGTAACCCTGTGAGCTTTAGGTTTTGTATTTTTATTTAC  
AGTAGGAGGATTAACAGGGGTAATTTAGCTAATTCTTCAATTGATATTATTCTTC

ACGATACTTACTATGTAGTAGCTCATTTTTCACTATGTTCTTTCTATAGGAGCTGTA  
TTTGCAATTATAGCCGGAATTGTCCAATGATTCCCATTATTTACCGGACTAACCT  
TAAATAATTTTTTTTTTAAAAACCCAATTTATTACTATATTTTTAGGTGTAAATTTAAC  
ATTTTTTCCCAACACTTTTTAGGGCTAAGAGGAATGCCTCGGCGATATTCCGGAT  
TATCCAGATGCTTTCACTATCTGAAATGCCATTTTCATCTATTGGTTCCATTATTTT  
TCTCACAAGAATTATCTTTTTTTTTATTTATCTTATGAGAAAGGCTTTCTTCCCAAC  
GTAATCTTTGAGAACTTTAAATGTAACAACCTTCAATTGAATGGTTCAAGCCCTAC  
CCCCTAGTG

SJA17

ATTATTAGACAAGAAAGGGGGGAAAAAGAAGCTTTTGGACCTTAGGAATAATTTA  
TGCCATGATAGCTATCGGATTATTAGGATTCGTAGTTTGAGCTCACCATATATTT  
ACAGTAGATAGATGTAGATACCCGAGCTTACTTCACTTCAGCAACTATAATTATT  
GCGGTTCCAACACTGGGATTAAGTCTTTAGATGACTAGCCACCTTTCATGGAAC  
CAAATTTTAAATAGACCAGTAACCCTGTGAGCTTTAGGTTTTGTATTTTTATTTAC  
AGTAGGAGGATTAACAGGGGTAATTTTAGCTAATTCTTCAATTGATATTATTCTTC  
ACGATACTTACTATGTAGTAGCTCATTTTTCACTATGTTCTTTCTATAGGAGCTGTA  
TTTGCAATTATAGCCGGAATTGTCCAATGATTCCCATTATTTACCGGACTAACCT  
TAAATAATTTTTTTTTTAAAAACCCAATTTATTACTATATTTTTAGGTGTAAATTTAAC  
ATTTTTTCCCAACACTTTTTAGGGCTAAGAGGAATGCCTCGGCGATATTCCGGAT  
TATCCAGATGCTTTCACTATCTGAAATGCCATTTTCATCTATTGGTTCCATTATTTT  
TCTCACAAGAATTATCTTTTTTTTTATTTATCTTATGAGAAAGGCTTTCTTCCCAAC  
GTAATCTTTGAGAACTTTAAATGTAACAACCTTCAATTGAATGGTTCAAGCCCTAC  
CCCCTAGTG

SJA3

ATTATTAGACAAGAAAGGGGGGAAAAAGAAGCTTTTGGACCTTAGGAATAATTTA  
TGCCATGATAGCTATCGGATTATTAGGATTCGTAGTTTGAGCTCACCATATATTT  
ACAGTAGATAGATGTAGATACCCGAGCTTACTTCACTTCAGCAACTATAATTATT  
GCGGTTCCAACACTGGGATTAAGTCTTTAGATGACTAGCCACCTTTCATGGAAC  
CAAATTTTAAATAGACCAGTAACCCTGTGAGCTTTAGGTTTTGTATTTTTATTTAC  
AGTAGGAGGATTAACAGGGGTAATTTTAGCTAATTCTTCAATTGATATTATTCTTC  
ACGATACTTACTATGTAGTAGCTCATTTTTCACTATGTTCTTTCTATAGGAGCTGTA  
TTTGCAATTATAGCCGGAATTGTCCAATGATTCCCATTATTTACCGGACTAACCT  
TAAATAATTTTTTTTTTAAAAACCCAATTTATTACTATATTTTTAGGTGTAAATTTAAC  
ATTTTTTCCCAACACTTTTTAGGGCTAAGAGGAATGCCTCGGCGATATTCCGGAT  
TATCCAGATGCTTTCACTATCTGAAATGCCATTTTCATCTATTGGTTCCATTATTTT  
TCTCACAAGAATTATCTTTTTTTTTATTTATCTTATGAGAAAGGCTTTCTTCCCAAC  
GTAATCTTTGAGAACTTTAAATGTAACAACCTTCAATTGAATGGTTCAAGCCCTAC  
CCCCTAGTG

SJA4

ATTATTAGACAAGAAAGGGGGGAAAAAGAAGCTTTTGGACCTTAGGAATAATTTA  
TGCCATGATAGCTATCGGATTATTAGGATTCGTAGTTTGAGCTCACCATATATTT  
ACAGTAGATAGATGTAGATACCCGAGCTTACTTCACTTCAGCAACTATAATTATT  
GCGGTTCCAACACTGGGATTAAGTCTTTAGATGACTAGCCACCTTTCATGGAAC  
CAAATTTTAAATAGACCAGTAACCCTGTGAGCTTTAGGTTTTGTATTTTTATTTAC  
AGTAGGAGGATTAACAGGGGTAATTTTAGCTAATTCTTCAATTGATATTATTCTTC  
ACGATACTTACTATGTAGTAGCTCATTTTTCACTATGTTCTTTCTATAGGAGCTGTA  
TTTGCAATTATAGCCGGAATTGTCCAATGATTCCCATTATTTACCGGACTAACCT  
TAAATAATTTTTTTTTTAAAAACCCAATTTATTACTATATTTTTAGGTGTAAATTTAAC  
ATTTTTTCCCAACACTTTTTAGGGCTAAGAGGAATGCCTCGGCGATATTCCGGAT  
TATCCAGATGCTTTCACTATCTGAAATGCCATTTTCATCTATTGGTTCCATTATTTT

TCTCACAAGAATTATCTTTTTTTTTATTTATCTTATGAGAAAGGCTTTCTTCCCAAC  
GTAATCTTTGAGAACTTTAAATGTAACAACCTTCAATTGAATGGTTCAAGCCCTAC  
CCCCTAGTG

SJA5

ATTATTAGACAAGAAAGGGGGGAAAAAGAAGCTTTTGGACCTTAGGAATAATTTA  
TGCCATGATAGCTATCGGATTATTAGGATTCGTAGTTTGAGCTCACCATATATTT  
ACAGTAGATAGATGTAGATACCCGAGCTTACTTCACTTCAGCAACTATAATTATT  
GCGGTTCCAACCTGGGATTAAGTCTTTAGATGACTAGCCACCTTTTCATGGAAC  
CAAATTTTAAATAGACCAGTAACCCTGTGAGCTTTAGGTTTTGTATTTTTATTTAC  
AGTAGGAGGATTAACAGGGGTAATTTAGCTAATTCTTCAATTGATATTATTCTTC  
ACGATACTTACTATGTAGTAGCTCATTTTCACTATGTTCTTTCTATAGGAGCTGTA  
TTTGCAATTATAGCCGGAATTGTCCAATGATTCCCATTATTTACCGGACTAACCT  
TAAATAATTTTTTTTTTAAAAACCCAATTTATTACTATATTTTTAGGTGTAAATTTAAC  
ATTTTTTCCCAACACTTTTTAGGGCTAAGAGGAATGCCTCGGCGATATTTCGGAT  
TATCCAGATGCTTTCACTATCTGAAATGCCATTTTCATCTATTGGTTCCATTATTT  
TCTCACAAGAATTATCTTTTTTTTTATTTATCTTATGAGAAAGGCTTTCTTCCCAAC  
GTAATCTTTGAGAACTTTAAATGTAACAACCTTCAATTGAATGGTTCAAGCCCTAC  
CCCCTAGTG

SMA1

ATTATTAGACAAGAAAGGGGGGAAAAAGAAGCTTTTGGACCTTAGGAATAATTTA  
TGCCATGATAGCTATCGGATTATTAGGATTCGTAGTTTGAGCTCACCATATATTT  
ACAGTAGATAGATGTAGATACCCGAGCTTACTTCACTTCAGCAACTATAATTATT  
GCGGTTCCAACCTGGGATTAAGTCTTTAGATGACTAGCCACCTTTTCATGGAAC  
CAAATTTTAAATAGACCAGTAACCCTGTGAGCTTTAGGTTTTGTATTTTTATTTAC  
AGTAGGAGGATTAACAGGGGTAATTTAGCTAATTCTTCAATTGATATTATTCTTC  
ACGATACTTACTATGTAGTAGCTCATTTTCACTATGTTCTTTCTATAGGAGCTGTA  
TTTGCAATTATAGCCGGAATTGTCCAATGATTCCCATTATTTACCGGACTAACCT  
TAAATAATTTTTTTTTTAAAAACCCAATTTATTACTATATTTTTAGGTGTAAATTTAAC  
ATTTTTTCCCAACACTTTTTAGGGCTAAGAGGAATGCCTCGGCGATATTTCGGAT  
TATCCAGATGCTTTCACTATCTGAAATGCCATTTTCATCTATTGGTTCCATTATTT  
TCTCACAAGAATTATCTTTTTTTTTATTTATCTTATGAGAAAGGCTTTCTTCCCAAC  
GTAATCTTTGAGAACTTTAAATGTAACAACCTTCAATTGAATGGTTCAAGCCCTAC  
CCCCTAGTG

SMA10

ATTATTAGACAAGAAAGGGGGGAAAAAGAAGCTTTTGGACCTTAGGAATAATTTA  
TGCCATGATAGCTATCGGATTATTAGGATTCGTAGTTTGAGCTCACCATATATTT  
ACAGTAGATAGATGTAGATACCCGAGCTTACTTCACTTCAGCAACTATAATTATT  
GCGGTTCCAACCTGGGATTAAGTCTTTAGATGACTAGCCACCTTTTCATGGAAC  
CAAATTTTAAATAGACCAGTAACCCTGTGAGCTTTAGGTTTTGTATTTTTATTTAC  
AGTAGGAGGATTAACAGGGGTAATTTAGCTAATTCTTCAATTGATATTATTCTTC  
ACGATACTTACTATGTAGTAGCTCATTTTCACTATGTTCTTTCTATAGGAGCTGTA  
TTTGCAATTATAGCCGGAATTGTCCAATGATTCCCATTATTTACCGGACTAACCT  
TAAATAATTTTTTTTTTAAAAACCCAATTTATTACTATATTTTTAGGTGTAAATTTAAC  
ATTTTTTCCCAACACTTTTTAGGGCTAAGAGGAATGCCTCGGCGATATTTCGGAT  
TATCCAGATGCTTTCACTATCTGAAATGCCATTTTCATCTATTGGTTCCATTATTT  
TCTCACAAGAATTATCTTTTTTTTTATTTATCTTATGAGAAAGGCTTTCTTCCCAAC  
GTAATCTTTGAGAACTTTAAATGTAACAACCTTCAATTGAATGGTTCAAGCCCTAC  
CCCCTAGTG

SMA11

ATTATTAGACAAGAAAGGGGGGAAAAAGAAGCTTTTGGACCTTAGGAATAATTTA

TGCCATGATAGCTATCGGATTATTAGGATTCGTAGTTTGAGCTCACCATATATTT  
ACAGTAGATAGATGTAGATACCCGAGCTTACTTCACTTCAGCAACTATAATTATT  
GCGGTTCCAACACTGGGATTAAGTCTTTAGATGACTAGCCACCTTTCATGGAAC  
CAAATTTTAAATAGACCAGTAACCCTGTGAGCTTTAGGTTTTGTATTTTTATTTAC  
AGTAGGAGGATTAACAGGGGTAATTTAGCTAATTCTTCAATTGATATTATTCTTC  
ACGATACTTACTATGTAGTAGCTCATTTTCACTATGTTCTTTCTATAGGAGCTGTA  
TTTGCAATTATAGCCGGAATTGTCCAATGATTCCCATTTTACCGGACTAACCT  
TAAATAATTTTTTTTTTAAAAACCCAATTTATTACTATATTTTTAGGTGTAAATTTAAC  
ATTTTTTCCCAACACTTTTTAGGGCTAAGAGGAATGCCTCGGCGATATTGCGAT  
TATCCAGATGCTTTCCTATCTGAAATGCCATTTTCACTATTGGTTCCATTATTTT  
TCTCACAAGAATTATCTTTTTTTTTATTTATCTTATGAGAAAGGCTTTCTTCCCAAC  
GTAATCTTTGAGAACTTTAAATGTAACAACCTTCAATTGAATGGTTCAAGCCCTAC  
CCCCTAGTG

SMA12

ATTATTAGACAAGAAAGGGGGGAAAAAAGAAGCTTTTGGACCTTAGGAATAATTTA  
TGCCATGATAGCTATCGGATTATTAGGATTCGTAGTTTGAGCTCACCATATATTT  
ACAGTAGATAGATGTAGATACCCGAGCTTACTTCACTTCAGCAACTATAATTATT  
GCGGTTCCAACACTGGGATTAAGTCTTTAGATGACTAGCCACCTTTCATGGAAC  
CAAATTTTAAATAGACCAGTAACCCTGTGAGCTTTAGGTTTTGTATTTTTATTTAC  
AGTAGGAGGATTAACAGGGGTAATTTAGCTAATTCTTCAATTGATATTATTCTTC  
ACGATACTTACTATGTAGTAGCTCATTTTCACTATGTTCTTTCTATAGGAGCTGTA  
TTTGCAATTATAGCCGGAATTGTCCAATGATTCCCATTTTACCGGACTAACCT  
TAAATAATTTTTTTTTTAAAAACCCAATTTATTACTATATTTTTAGGTGTAAATTTAAC  
ATTTTTTCCCAACACTTTTTAGGGCTAAGAGGAATGCCTCGGCGATATTGCGAT  
TATCCAGATGCTTTCCTATCTGAAATGCCATTTTCACTATTGGTTCCATTATTTT  
TCTCACAAGAATTATCTTTTTTTTTATTTATCTTATGAGAAAGGCTTTCTTCCCAAC  
GTAATCTTTGAGAACTTTAAATGTAACAACCTTCAATTGAATGGTTCAAGCCCTAC  
CCCCTAGTG

SMA13

ATTATTAGACAAGAAAGGGGGGAAAAAAGAAGCTTTTGGACCTTAGGAATAATTTA  
TGCCATGATAGCTATCGGATTATTAGGATTCGTAGTTTGAGCTCACCATATATTT  
ACAGTAGATAGATGTAGATACCCGAGCTTACTTCACTTCAGCAACTATAATTATT  
GCGGTTCCAACACTGGGATTAAGTCTTTAGATGACTAGCCACCTTTCATGGAAC  
CAAATTTTAAATAGACCAGTAACCCTGTGAGCTTTAGGTTTTGTATTTTTATTTAC  
AGTAGGAGGATTAACAGGGGTAATTTAGCTAATTCTTCAATTGATATTATTCTTC  
ACGATACTTACTATGTAGTAGCTCATTTTCACTATGTTCTTTCTATAGGAGCTGTA  
TTTGCAATTATAGCCGGAATTGTCCAATGATTCCCATTTTACCGGACTAACCT  
TAAATAATTTTTTTTTTAAAAACCCAATTTATTACTATATTTTTAGGTGTAAATTTAAC  
ATTTTTTCCCAACACTTTTTAGGGCTAAGAGGAATGCCTCGGCGATATTGCGAT  
TATCCAGATGCTTTCCTATCTGAAATGCCATTTTCACTATTGGTTCCATTATTTT  
TCTCACAAGAATTATCTTTTTTTTTATTTATCTTATGAGAAAGGCTTTCTTCCCAAC  
GTAATCTTTGAGAACTTTAAATGTAACAACCTTCAATTGAATGGTTCAAGCCCTAC  
CCCCTAGTG

SMA14

ATTATTAGACAAGAAAGGGGGGAAAAAAGAAGCTTTTGGACCTTAGGAATAATTTA  
TGCCATGATAGCTATCGGATTATTAGGATTCGTAGTTTGAGCTCACCATATATTT  
ACAGTAGATAGATGTAGATACCCGAGCTTACTTCACTTCAGCAACTATAATTATT  
GCGGTTCCAACACTGGGATTAAGTCTTTAGATGACTAGCCACCTTTCATGGAAC  
CAAATTTTAAATAGACCAGTAACCCTGTGAGCTTTAGGTTTTGTATTTTTATTTAC  
AGTAGGAGGATTAACAGGGGTAATTTAGCTAATTCTTCAATTGATATTATTCTTC

ACGATACTTACTATGTAGTAGCTCATTTTTCACTATGTTCCCTTCTATAGGAGCTGTA  
TTTGCAATTATAGCCGGAATTGTCCAATGATTCCCATTATTTACCGGACTAACCT  
TAAATAATTTTTTTTTTAAAAACCCAATTTATTACTATATTTTTAGGTGTAAATTTAAC  
ATTTTTTCCCAACACTTTTTAGGGCTAAGAGGAATGCCTCGGCGATATTCCGGAT  
TATCCAGATGCTTTCACTATCTGAAATGCCATTTTCATCTATTGGTTCCATTATTTT  
TCTCACAAGAATTATCTTTTTTTTTATTTATCTTATGAGAAAGGCTTTCTTCCCAAC  
GTAATCTTTGAGAACTTTAAATGTAACAACCTTCAATTGAATGGTTCAAGCCCTAC  
CCCCTAGTG

SMA6

ATTATTAGACAAGAAAGGGGGGAAAAAGAAGCTTTTGGACCTTAGGAATAATTTA  
TGCCATGATAGCTATCGGATTATTAGGATTCGTAGTTTGAGCTCACCATATATTT  
ACAGTAGATAGATGTAGATACCCGAGCTTACTTCACTTCAGCAACTATAATTATT  
GCGGTTCCAACCTGGGATTAAGTCTTTAGATGACTAGCCACCTTTTCATGGAACCT  
CAAATTTTAAATAGACCAGTAACCCTGTGAGCTTTAGGTTTTGTATTTTTATTTAC  
AGTAGGAGGATTAACAGGGGTAATTTTAGCTAATTCTTCAATTGATATTATTCTTC  
ACGATACTTACTATGTAGTAGCTCATTTTTCACTATGTTCTTTCTATAGGAGCTGTA  
TTTGCAATTATAGCCGGAATTGTCCAATGATTCCCATTATTTACCGGACTAACCT  
TAAATAATTTTTTTTTTAAAAACCCAATTTATTACTATATTTTTAGGTGTAAATTTAAC  
ATTTTTTCCCAACACTTTTTAGGGCTAAGAGGAATGCCTCGGCGATATTCCGGAT  
TATCCAGATGCTTTCACTATCTGAAATGCCATTTTCATCTATTGGTTCCATTATTTT  
TCTCACAAGAATTATCTTTTTTTTTATTTATCTTATGAGAAAGGCTTTCTTCCCAAC  
GTAATCTTTGAGAACTTTAAATGTAACAACCTTCAATTGAATGGTTCAAGCCCTAC  
CCCCTAGTG

SMI1

ATTATTAGACAAGAAAGGGGGGAAAAAGAAGCTTTTGGACCTTAGGAATAATTTA  
TGCCATGATAGCTATCGGATTATTAGGATTCGTAGTTTGAGCTCACCATATATTT  
ACAGTAGATAGATGTAGATACCCGAGCTTACTTCACTTCAGCAACTATAATTATT  
GCGGTTCCAACCTGGGATTAAGTCTTTAGATGACTAGCCACCTTTTCATGGAACCT  
CAAATTTTAAATAGACCAGTAACCCTGTGAGCTTTAGGTTTTGTATTTTTATTTAC  
AGTAGGAGGATTAACAGGGGTAATTTTAGCTAATTCTTCAATTGATATTATTCTTC  
ACGATACTTACTATGTAGTAGCTCATTTTTCACTATGTTCTTTCTATAGGAGCTGTA  
TTTGCAATTATAGCCGGAATTGTCCAATGATTCCCATTATTTACCGGACTAACCT  
TAAATAATTTTTTTTTTAAAAACCCAATTTATTACTATATTTTTAGGTGTAAATTTAAC  
ATTTTTTCCCAACACTTTTTAGGGCTAAGAGGAATGCCTCGGCGATATTCCGGAT  
TATCCAGATGCTTTCACTATCTGAAATGCCATTTTCATCTATTGGTTCCATTATTTT  
TCTCACAAGAATTATCTTTTTTTTTATTTATCTTATGAGAAAGGCTTTCTTCCCAAC  
GTAATCTTTGAGAACTTTAAATGTAACAACCTTCAATTGAATGGTTCAAGCCCTAC  
CCCCTAGTG

SMI2

ATTATTAGACAAGAAAGGGGGGAAAAAGAAGCTTTTGGACCTTAGGAATAATTTA  
TGCCATGATAGCTATCGGATTATTAGGATTCGTAGTTTGAGCTCACCATATATTT  
ACAGTAGATAGATGTAGATACCCGAGCTTACTTCACTTCAGCAACTATAATTATT  
GCGGTTCCAACCTGGGATTAAGTCTTTAGATGACTAGCCACCTTTTCATGGAACCT  
CAAATTTTAAATAGACCAGTAACCCTGTGAGCTTTAGGTTTTGTATTTTTATTTAC  
AGTAGGAGGATTAACAGGGGTAATTTTAGCTAATTCTTCAATTGATATTATTCTTC  
ACGATACTTACTATGTAGTAGCTCATTTTTCACTATGTTCTTTCTATAGGAGCTGTA  
TTTGCAATTATAGCCGGAATTGTCCAATGATTCCCATTATTTACCGGACTAACCT  
TAAATAATTTTTTTTTTAAAAACCCAATTTATTACTATATTTTTAGGTGTAAATTTAAC  
ATTTTTTCCCAACACTTTTTAGGGCTAAGAGGAATGCCTCGGCGATATTCCGGAT  
TATCCAGATGCTTTCACTATCTGAAATGCCATTTTCATCTATTGGTTCCATTATTTT

TCTCACAAGAATTATCTTTTTTTTTATTTATCTTATGAGAAAGGCTTTCTTCCCAAC  
GTAATCTTTGAGAACTTTAAATGTAACAACCTTCAATTGAATGGTTCAAGCCCTAC  
CCCCTAGTG

sob1

ATTATTAGACAAGAAAGGGGGGAAAAAAGAAGCTTTTGGACCTTAGGAATAATTTA  
TGCCATGATAGCTATCGGATTATTAGGATTCGTAGTTTGAGCTCACCATATATTT  
ACAGTAGATAGATGTAGATACCCGAGCTTACTTCACTTCAGCAACTATAATTATT  
GCGGTTCCAACCTGGGATTAAGTCTTTAGATGACTAGCCACCTTTTCATGGAAC  
CAAATTTTAAATAGACCAGTAACCCTGTGAGCTTTAGGTTTTGTATTTTTATTTAC  
AGTAGGAGGATTAACGGGGGTAATTTAGCTAATTCTTCAATTGATATTATTCTTC  
ACGATACTTACTATGTAGTAGCTCATTTTCACTATGTTCTTTCTATAGGAGCTGTA  
TTTGCAATTATAGCCGGAATTGTCCAATGATTCCCATTATTTACCGGACTAACCT  
TAAATAATTTTTTTTTAAAAACCCAATTTATTACTATATTTTTAGGTGTAAATTTAAC  
ATTTTTTCCCAACACTTTTTAGGGCTAAGAGGAATGCCTCGGCGATATTCGGAT  
TATCCAGATGCTTTCACTATCTGAAATGCCATTTTCATCTATTGGTTCCATTATTTCT  
TCTCACAAGAATTATCTTTTTTTTTATTTATCTTATGAGAAAGGCTTTCTTCCCAAC  
GTAATCTTTGAGAACTTTAAATGTAACAACCTTCAATTGAATGGTTCAAGCCCTAC  
CCCCTAGTG

SOB10

ATTATTAGACAAGAAAGGGGGGAAAAAAGAAGCTTTTGGACCTTAGGAATAATTTA  
TGCCATGATAGCTATCGGATTATTAGGATTCGTAGTTTGAGCTCACCATATATTT  
ACAGTAGATAGATGTAGATACCCGAGCTTACTTCACTTCAGCAACTATAATTATC  
GCGGTTCCAACCTGGGATTAAGTCTTTAGGTGACTAGCCACCTTTTCATGGAAC  
CAAATTTTAAATAGACCAGTAACCCTGTGAGCTTTAGGTTTTGTATTTTTATTTAC  
AGTAGGAGGATTAACAGGGGTAATTTAGCTAATTCTTCAATTGATATTATTCTTC  
ACGATACTTACTATGTAGTAGCTCATTTTCACTATGTTCTTTCTATAGGAGCTGTA  
TTTGCAATTATAGCCGGAATTGTCCAATGATTCCCATTATTTACTGGACTAACCTT  
AAATAATTTTTTTTTAAAAACCCAATTTATTACTATATTTTTAGGTGTAAATTTAACA  
TTTTTTCCTCAACACTTTTTAGGGCTAAGAGGGATGCCTCGGCGATATTCGGATT  
ATCCAGATGCTTTCACTATCTGAAATGCCATTTTCATCTATTGGTTCCATTATTTCT  
CTCACAAGAATTATCTTTTTTTTTATTTATCTTATGAGAAAGGCTTTCTTCCCAACG  
TAAATCTTTGAGAACTTTAAATGTAACAACCTTCAATTGAATGGTTCAAGCCCTACC  
CCCTAGTG

SOB12

ATTATTAGACAAGAAAGGGGGGAAAAAAGAAGCTTTTGGACCTTAGGAATAATTTA  
TGCCATGATAGCTATCGGATTATTAGGATTCGTAGTTTGAGCTCACCATATATTT  
ACAGTAGATAGATGTAGATACCCGAGCTTACTTCACTTCAGCAACTATAATTATC  
GCGGTTCCAACCTGGGATTAAGTCTTTAGGTGACTAGCCACCTTTTCATGGAAC  
CAAATTTTAAATAGACCAGTAACCCTGTGAGCTTTAGGTTTTGTATTTTTATTTAC  
AGTAGGAGGATTAACAGGGGTAATTTAGCTAATTCTTCAATTGATATTATTCTTC  
ACGATACTTACTATGTAGTAGCTCATTTTCACTATGTTCTTTCTATAGGAGCTGTA  
TTTGCAATTATAGCCGGAATTGTCCAATGATTCCCATTATTTACTGGACTAACCTT  
AAATAATTTTTTTTTAAAAACCCAATTTATTACTATATTTTTAGGTGTAAATTTAACA  
TTTTTTCCTCAACACTTTTTAGGGCTAAGAGGAATGCCTCGGCGATATTCGGATT  
ATCCAGATGCTTTCACTATCTGAAATGCCATTTTCATCTATTGGTTCCATTATTTCT  
CTCACAAGAATTATCTTTTTTTTTATTTATCTTATGAGAAAGGCTTTCTTCCCAACG  
TAAATCTTTGAGAACTTTAAATGTAACAACCTTCAATTGAATGGTTCAAGCCCTACC  
CCCTAGTG

SOB1\_2

ATTATTAGACAAGAAAGGGGGGAAAAAAGAAGCTTTTGGACCTTAGGAATAATTTA

TGCCATGATAGCTATCGGATTATTAGGATTCGTAGTTTGAGCTCACCATATATTT  
ACAGTAGATAGATGTAGATACCCGAGCTTACTTCACTTCAGCAACTATAATTATC  
GCGGTTCCAACCTGGGATTAAGTCTTTAGGTGACTAGCCACCTTTCATGGAAC  
CAAATTTTAAATAGACCAGTAACCCTGTGAGCTTTAGGTTTTGTATTTTTATTTAC  
AGTAGGAGGATTAACAGGGGTAATTTAGCTAATTCTTCAATTGATATTATTCTTC  
ACGATACTTACTATGTAGTAGCTCATTTTCACTATGTTCTTTCTATAGGAGCTGTA  
TTTGCAATTATAGCCGGAATTGTCCAATGATTCCCATTTACTGGACTAACCTT  
AAATAATTTTTTTTTTAAAAACCCAATTTATTACTATATTTTTAGGTGTAAATTTAACA  
TTTTTTCCTCAACACTTTTTAGGGCTAAGAGGAATGCCTCGGCGATATTCGGATT  
ATCCAGATGCTTTCACTATCTGAAATGCCATTTTCACTATTGGTTCCATTATTTCT  
CTCACAAGAATTATCTTTTTTTTTATTTATCTTATGAGAAAGGCTTTCTTCCCAACG  
TAAATCTTTGAGAACTTTAAATGTAACAACCTTCAATTGAATGGTTCAAGCCCTACC  
CCCTAGTG

SOB2

ATTATTAGACAAGAAAGGGGGGAAAAAAGAAGCTTTTGGACCTTAGGAATAATTTA  
TGCCATGATAGCTATCGGATTATTAGGATTCGTAGTTTGAGCTCACCATATATTT  
ACAGTAGATAGATGTAGATACCCGAGCTTACTTCACTTCAGCAACTATAATTATT  
GCGGTTCCAACCTGGGATTAAGTCTTTAGATGACTAGCCACCTTTCATGGAAC  
CAAATTTTAAATAGACCAGTAACCCTGTGAGCTTTAGGTTTTGTATTTTTATTTAC  
AGTAGGAGGATTAACAGGGGTAATTTAGCTAATTCTTCAATTGATATTATTCTTC  
ACGATACTTACTATGTAGTAGCTCATTTTCACTATGTTCTTTCTATAGGAGCTGTA  
TTTGCAATTATAGCCGGAATTGTCCAATGATTCCCATTTTACCGGACTAACCT  
TAAATAATTTTTTTTTTAAAAACCCAATTTATTACTATATTTTTAGGTGTAAATTTAACA  
ATTTTTTCCCAACACTTTTTAGGGCTAAGAGGAATGCCTCGGCGATATTCGGAT  
TATCCAGATGCTTTCACTATCTGAAATGCCATTTTCACTATTGGTTCCATTATTTCT  
TCTCACAAGAATTATCTTTTTTTTTATTTATCTTATGAGAAAGGCTTTCTTCCCAAC  
GTAATCTTTGAGAACTTTAAATGTAACAACCTTCAATTGAATGGTTCAAGCCCTAC  
CCCTAGTG

SOB2\_1

ATTATTAGACAAGAAAGGGGGGAAAAAAGAAGCTTTTGGACCTTAGGAATAATTTA  
TGCCATGATAGCTATCGGATTATTAGGATTCGTAGTTTGAGCTCACCATATATTT  
ACAGTAGATAGATGTAGATACCCGAGCTTACTTCACTTCAGCAACTATAATTATC  
GCGGTTCCAACCTGGGATTAAGTCTTTAGGTGACTAGCCACCTTTCATGGAAC  
CAAATTTTAAATAGACCAGTAACCCTGTGAGCTTTAGGTTTTGTATTTTTATTTAC  
AGTAGGAGGATTAACAGGGGTAATTTAGCTAATTCTTCAATTGATATTATTCTTC  
ACGATACTTACTATGTAGTAGCTCATTTTCACTATGTTCTTTCTATAGGAGCTGTA  
TTTGCAATTATAGCCGGAATTGTCCAATGATTCCCATTTTACTGGACTAACCTT  
AAATAATTTTTTTTTTAAAAACCCAATTTATTACTATATTTTTAGGTGTAAATTTAACA  
TTTTTTCCTCAACACTTTTTAGGGCTAAGAGGAATGCCTCGGCGATATTCGGATT  
ATCCAGATGCTTTCACTATCTGAAATGCCATTTTCACTATTGGTTCCATTATTTCT  
CTCACAAGAATTATCTTTTTTTTTATTTATCTTATGAGAAAGGCTTTCTTCCCAACG  
TAAATCTTTGAGAACTTTAAATGTAACAACCTTCAATTGAATGGTTCAAGCCCTACC  
CCCTAGTG

TAP1

ATTATTAGACAAGAAAGGGGGGAAAAAAGAAGCTTTTGGACCTTAGGAATAATTTA  
TGCCATGATAGCTATCGGATTATTAGGATTCGTAGTTTGAGCTCACCATATATTT  
ACAGTAGATAGATGTAGATACCCGAGCTTACTTCACTTCAGCAACTATAATTATT  
GCGGTTCCAACCTGGGATTAAGTCTTTAGATGACTAGCCACCTTTCATGGAAC  
CAAATTTTAAATAGACCAGTAACCCTGTGAGCTTTAGGTTTTGTATTTTTATTTAC  
AGTAGGAGGATTAACAGGGGTAATTTAGCTAATTCTTCAATTGATATTATTCTTC

ACGATACTTACTATGTAGTAGCTCATTTTTCACTATGTTCTTTCTATAGGAGCTGTA  
TTTGCAATTATAGCCGGAATTGTCCAATGATTCCCATTATTTACCGGACTAACCT  
TAAATAATTTTTTTTTTAAAAACCCAATTTATTACTATATTTTTAGGTGTAAATTTAAC  
ATTTTTTCCCAACACTTTTTAGGGCTAAGAGGAATGCCTCGGCGATATTCCGGAT  
TATCCAGATGCTTTCACTATCTGAAATGCCATTTTCATCTATTGGTTCCATTATTTT  
TCTCACAAGAATTATCTTTTTTTTTATTTATCTTATGAGAAAGGCTTTCTTCCCAAC  
GTAATCTTTGAGAACTTTAAATGTAACAACCTTCAATTGAATGGTTCAAGCCCTAC  
CCCCTAGTG

TAP2

ATTATTAGACAAGAAAGGGGGGAAAAAGAAGCTTTTGGACCTTAGGAATAATTTA  
TGCCATGATAGCTATCGGATTATTAGGATTCGTAGTTTGAGCTCACCATATATTT  
ACAGTAGATAGATGTAGATACCCGAGCTTACTTCACTTCAGCAACTATAATTATT  
GCGGTTCCAACCTGGGATTAAGTCTTTAGATGACTAGCCACCTTTTCATGGAACCT  
CAAATTTTAAATAGACCAGTAACCCTGTGAGCTTTAGGTTTTGTATTTTTATTTAC  
AGTAGGAGGATTAACAGGGGTAATTTTAGCTAATTCTTCAATTGATATTATTCTTC  
ACGATACTTACTATGTAGTAGCTCATTTTTCACTATGTTCTTTCTATAGGAGCTGTA  
TTTGCAATTATAGCCGGAATTGTCCAATGATTCCCATTATTTACCGGACTAACCT  
TAAATAATTTTTTTTTTAAAAACCCAATTTATTACTATATTTTTAGGTGTAAATTTAAC  
ATTTTTTCCCAACACTTTTTAGGGCTAAGAGGAATGCCTCGGCGATATTCCGGAT  
TATCCAGATGCTTTCACTATCTGAAATGCCATTTTCATCTATTGGTTCCATTATTTT  
TCTCACAAGAATTATCTTTTTTTTTATTTATCTTATGAGAAAGGCTTTCTTCCCAAC  
GTAATCTTTGAGAACTTTAAATGTAACAACCTTCAATTGAATGGTTCAAGCCCTAC  
CCCCTAGTG

tol1

ATTATTAGACAAGAAAGGGGGGAAAAAGAAGCTTTTGGACCTTAGGAATAATTTA  
TGCCATGATAGCTATCGGATTATTAGGATTCGTAGTTTGAGCTCACCATATATTT  
ACAGTAGATAGATGTAGATACCCGAGCTTACTTCACTTCAGCAACTATAATTATT  
GCGGTTCCAACCTGGGATTAAGTCTTTAGATGACTAGCCACCTTTTCATGGAACCT  
CAAATTTTAAATAGACCAGTAACCCTGTGAGCTTTAGGTTTTGTATTTTTATTTAC  
AGTAGGAGGATTAACAGGGGTAATTTTAGCTAATTCTTCAATTGATATTATTCTTC  
ACGATACTTACTATGTAGTAGCTCATTTTTCACTATGTTCTTTCTATAGGAGCTGTA  
TTTGCAATTATAGCCGGAATTGTCCAATGATTCCCATTATTTACCGGACTAACCT  
TAAATAATTTTTTTTTTAAAAACCCAATTTATTACTATATTTTTAGGTGTAAATTTAAC  
ATTTTTTCCCAACACTTTTTAGGGCTAAGAGGAATGCCTCGGCGATATTCCGGAT  
TATCCAGATGCTTTCACTATCTGAAATGCCATTTTCATCTATTGGTTCCATTATTTT  
TCTCACAAGAATTATCTTTTTTTTTATTTATCTTATGAGAAAGGCTTTCTTCCCAAC  
GTAATCTTTGAGAACTTTAAATGTAACAACCTTCAATTGAATGGTTCAAGCCCTAC  
CCCCTAGTG

TOL1\_1

ATTATTAGACAAGAAAGGGGGGAAAAAGAAGCTTTTGGACCTTAGGAATAATTTA  
TGCCATGATAGCTATCGGATTATTAGGATTCGTAGTTTGAGCTCACCATATATTT  
ACAGTAGATAGATGTAGATACCCGAGCTTACTTCACTTCAGCAACTATAATTATT  
GCGGTTCCAACCTGGGATTAAGTCTTTAGATGACTAGCCACCTTTTCATGGAACCT  
CAAATTTTAAATAGACCAGTAACCCTGTGAGCTTTAGGTTTTGTATTTTTATTTAC  
AGTAGGAGGATTAACAGGGGTAATTTTAGCTAATTCTTCAATTGATATTATTCTTC  
ACGATACTTACTATGTAGTAGCTCATTTTTCACTATGTTCTTTCTATAGGAGCTGTA  
TTTGCAATTATAGCCGGAATTGTCCAATGATTCCCATTATTTACCGGACTAACCT  
TAAATAATTTTTTTTTTAAAAACCCAATTTATTACTATATTTTTAGGTGTAAATTTAAC  
ATTTTTTCCCAACACTTTTTAGGGCTAAGAGGAATGCCTCGGCGATATTCCGGAT  
TATCCAGATGCTTTCACTATCTGAAATGCCATTTTCATCTATTGGTTCCATTATTTT



TCTCACAAGAATTATCTTTTTTTTTATTTATCTTATGAGAAAGGCTTTCTTCCCAAC  
GTAATCTTTGAGAACTTTAAATGTAACAACCTTCAATTGAATGGTTCAAGCCCTAC  
CCCCTAGTG

TOL5

ATTATTAGACAAGAAAGGGGGGAAAAAAGAAGCTTTTGGACCTTAGGAATAATTTA  
TGCCATGATAGCTATCGGATTATTAGGATTCGTAGTTTGAGCTCACCATATATTT  
ACAGTAGATAGATGTAGATACCCGAGCTTACTTCACTTCAGCAACTATAATTATT  
GCGGTTCCAACCTGGGATTAAGTCTTTAGATGACTAGCCACCTTTTCATGGAAC  
CAAATTTTAAATAGACCAGTAACCCTGTGAGCTTTAGGTTTTGTATTTTTATTTAC  
AGTAGGAGGATTAACAGGGGTAATTTAGCTAATTCTTCAATTGATATTATTCTTC  
ACGATACTTACTATGTAGTAGCTCATTTTCACTATGTTCTTTCTATAGGAGCTGTA  
TTTGCAATTATAGCCGGAATTGTCCAATGATTCCCATTATTTACCGGACTAACCT  
TAAATAATTTTTTTTTTAAAAACCCAATTTATTACTATATTTTTAGGTGTAAATTTAAC  
ATTTTTTCCCAACACTTTTTAGGGCTAAGAGGAATGCCTCGGCGATATTTCGGAT  
TATCCAGATGCTTTCACTATCTGAAATGCCATTTTCATCTATTGGTTCCATTATTTCT  
TCTCACAAGAATTATCTTTTTTTTTATTTATCTTATGAGAAAGGCTTTCTTCCCAAC  
GTAATCTTTGAGAACTTTAAATGTAACAACCTTCAATTGAATGGTTCAAGCCCTAC  
CCCCTAGTG

VIC10

ATTATTAGACAAGAAAGGGGGGAAAAAAGAAGCTTTTGGACCTTAGGAATAATTTA  
TGCCATGATAGCTATCGGATTATTAGGATTCGTAGTTTGAGCTCACCATATATTT  
ACAGTAGATAGATGTAGATACCCGAGCTTACTTCACTTCAGCAACTATAATTATT  
GCGGTTCCAACCTGGGATTAAGTCTTTAGATGACTAGCCACCTTTTCATGGAAC  
CAAATTTTAAATAGACCAGTAACCCTGTGAGCTTTAGGTTTTGTATTTTTATTTAC  
AGTAGGAGGATTAACAGGGGTAATTTAGCTAATTCTTCAATTGATATTATTCTTC  
ACGATACTTACTATGTAGTAGCTCATTTTCACTATGTTCTTTCTATAGGAGCTGTA  
TTTGCAATTATAGCCGGAATTGTCCAATGATTCCCATTATTTACCGGACTAACCT  
TAAATAATTTTTTTTTTAAAAACCCAATTTATTACTATATTTTTAGGTGTAAATTTAAC  
ATTTTTTCCCAACACTTTTTAGGGCTAAGAGGAATGCCTCGGCGATATTTCGGAT  
TATCCAGATGCTTTCACTATCTGAAATGCCATTTTCATCTATTGGTTCCATTATTTCT  
TCTCACAAGAATTATCTTTTTTTTTATTTATCTTATGAGAAAGGCTTTCTTCCCAAC  
GTAATCTTTGAGAACTTTAAATGTAACAACCTTCAATTGAATGGTTCAAGCCCTAC  
CCCCTAGTG

XAN4

ATTATTAGACAAGAAAGGGGGGAAAAAAGAAGCTTTTGGACCTTAGGAATAATTTA  
TGCCATGATAGCTATCGGATTATTAGGATTCGTAGTTTGAGCTCACCATATATTT  
ACAGTAGATAGATGTAGATACCCGAGCTTACTTCACTTCAGCAACTATAATTATC  
GCGGTTCCAACCTGGGATTAAGTCTTTAGGTGACTAGCCACCTTTTCATGGAAC  
CAAATTTTAAATAGACCAGTAACCCTGTGAGCTTTAGGTTTTGTATTTTTATTTAC  
AGTAGGAGGATTAACAGGGGTAATTTAGCTAATTCTTCAATTGATATTATTCTTC  
ACGATACTTACTATGTAGTAGCTCATTTTCACTATGTTCTTTCTATAGGAGCTGTA  
TTTGCAATTATAGCCGGAATTGTCCAATGATTCCCATTATTTACTGGACTAACCTT  
AAATAATTTTTTTTTTAAAAACCCAATTTATTACTATATTTTTAGGTGTAAATTTAAC  
TTTTTTCCTCAACACTTTTTAGGGCTAAGAGGAATGCCTCGGCGATATTTCGGATT  
ATCCAGATGCTTTTCGCTATCTGAAATGCCATTTTCATCTATTGGTTCCATTATTTCT  
CTCACAAGAATTATCTTTTTTTTTATTTATCTTATGAGAAAGGCTTTCTTCCCAACG  
TAAATCTTTGAGAACTTTAAATGTAACAACCTTCAATTGAATGGTTCAAGCCCTACC  
CCCTAGTG

XAX2

ATTATTAGACAAGAAAGGGGGGAAAAAAGAAGCTTTTGGACCTTAGGAATAATTTA

TGCCATGATAGCTATCGGATTATTAGGATTCGTAGTTTGAGCTCACCATATATTT  
ACAGTAGATAGATGTAGATACCCGAGCTTACTTCACTTCAGCAACTATAATTATT  
GCGGTTCCAACCTGGGATTAAGTCTTTAGATGACTAGCCACCTTTCATGGAACCT  
CAAATTTTAAATAGACCAGTAACCCTGTGAGCTTTAGGTTTTGTATTTTTATTTAC  
AGTAGGAGGATTAACAGGGGTAATTTAGCTAATTCTTCAATTGATATTATTCTTC  
ACGATACTTACTATGTAGTAGCTCATTTTCACTATGTTCTTTCTATAGGAGCTGTA  
TTTGCAATTATAGCCGGAATTGTCCAATGATTCCCATTATTTACCGGACTAACCT  
TAAATAATTTTTTTTTTAAAAACCCAATTTATTACTATATTTTTAGGTGTAAATTTAAC  
ATTTTTTCCCAACACTTTTTAGGGCTAAGAGGAATGCCTCGGCGATATTCGGAT  
TATCCAGATGCTTTCCTATCTGAAATGCCATTTTCACTATTGGTTCCATTATTTCTC  
TCTCACAAGAATTATCTTTTTTTTTATTTATCTTATGAGAAAGGCTTTCTTCCCAAC  
GTAATCTTTGAGAACTTTAAATGTAACAACCTTCAATTGAATGGTTCAAGCCCTAC  
CCCTAGTG

MEX\_SFP

ATTATTAGACAAGAAAGGGGGGAAAAAAGAAGCTTTTGGACCTTAGGAATAATTTA  
TGCCATAATAGCTATCGGATTATTAGGATTCGTAGTTTGAGCTCACCATATATTTA  
CAGTAGATAGATGTAGATACCCGAGCTTACTTCACTTCAGCAACTATAATTATTG  
CGGTTCCAACCTGGGATTAAGTCTTTAGATGACTAGCCACCTTTCATGGAACCTCA  
AATTTTAAATAGACCAGTAACCCTGTGAGCTTTAGGTTTTGTATTTTTATTTACAG  
TAGGAGGATTAACAGGGGTAATTTAGCTAATTCTTCAATTGATATTATTCTTCAC  
GATACTTACTATGTAGTAGCTCATTTTCACTATGTTCTTTCTATAGGAGCTGTATT  
TGCAATTATAGCCGGAATTGTCCAATGATTCCCATTATTTACTGGACTAACCTTA  
AATAATTTTTTTTTTAAAAACCCAATTTATTACTATATTTTTAGGTGTAAATTTAACAT  
TTTTTCTCAACACTTTTTAGGGCTAAGAGGAATGCCTCGGCGATATTCGGATTA  
TCCAGATGCTTTCCTATCTGAAATGCCATTTTCACTATTGGTTCCATTATTTCTC  
TCACAAGAATTATCTTTTTTTTTATTTATCTTATGAGAAAGGCTTTCTTCCCAACGT  
AAATCTTTGAGAACTTTAAATGTAACAACCTTCAATTGAATGGTTCAAGCCCTACC  
CCCTAGTG

MEX\_COE\_2

ATTATTAGACAAGAAAGGGGGGAAAAAAGAACCTTTTGGACCTTAGGAATAATTTA  
TGCCATAATAGCTATCGGATTATTAGGATTCGTAGTTTGAGCTCACCATATATTTA  
CAGTAGATAGATGTAGATACCCGAGCTTACTTCACTTCAGCAACTATAATTATTG  
CGGTTCCAACCTGGGATTAAGTCTTTAGATGACTAGCCACCTTTCATGGAACCTCA  
AATTTTAAATAGACCAGTAACCCTGTGAGCTTTAGGTTTTGTATTTTTATTTACAG  
TAGGAGGATTAACAGGGGTAATTTAGCTAATTCTTCAATTGATATTATTCTTCAC  
GATACTTACTATGTAGTAGCTCATTTTCACTATGTTCTTTCTATAGGAGCTGTATT  
TGCAATTATAGCCGGAATTGTCCAATGATTCCCATTATTTACTGGACTAACCTTA  
AATAATTTTTTTTTTAAAAACCCAATTTATTACTATATTTTTAGGTGTAAATTTAACAT  
TTTTTCTCAACACTTTTTAGGGCTAAGAGGAATGCCTCGGCGATATTCGGATTA  
TCCAGATGCTTTCCTATCTGAAATGCCATTTTCACTATTGGTTCCATTATTTCTC  
TCACAAGAATTATCTTTTTTTTTATTTATCTTATGAGAAAGGCTTTCTTCCCAACGT  
AAATCTTTGAGAACTTTAAATGTAACAACCTTCAATTGAATGGTTCAAGCCCTACC  
CCCTAGTG

MEX\_SAG\_5

ATTATTAGACAAGAAAGGGGGGAAAAAAGAAGCTTTTGGACCTTAGGAATAATTTA  
TGCCATAATAGCTATCGGATTATTAGGATTCGTAGTTTGAGCTCACCATATATTTA  
CAGTAGATAGATGTAGATACCCGAGCTTACTTCACTTCAGCAACTATAATTATTG  
CGGTTCCAACCTGGGATTAAGTCTTTAGATGACTAGCCACCTTTCATGGAACCTCA  
AATTTTAAATAGACCAGTAACCCTGTGAGCTTTAGGTTTTGTATTTTTATTTACAG  
TAGGAGGATTAACAGGGGTAATTTAGCTAATTCTTCAATTGATATTATTCTTCAC

GATACTTACTATGTAGTAGCTCATTTTTCACTATGTTCTTTCTATAGGAGCTGTATT  
TGCAATTATAGCCGGAATTGTCCAATGATTCCCATTATTTACTGGGCTAACCTTA  
ATAAATTTTTTTTTAAAAACCCAATTTATTACTATATTTTTAGGTGTAAATTTAACAT  
TTTTTCCTCAACACTTTTTAGGGCTAAGAGGAATGCCTCGGCGATATTCGGATTA  
TCCAGATGCTTTCACTATCTGAAATGCCATTTTCATCTATTGGTTCCATTATTTCTC  
TCACAAGAATTATCTTTTTTTTTATTTATCTTATGAGAAAGGCTTTCTTCCCAACGT  
AAATCTTTGAGAACTTTAAATGTAACAACCTTCAATTGAATGGTTCAAGCCCTACC  
CCCTAGTG

MEX\_SCA

ATTATTAGACAAGAAAGGGGGAAAAAAGAAGCTTTTGGACCTTAGGAATAATTTA  
TGCCATAATAGCTATCGGATTATTAGGATTTCGTAGTTTGAGCTCACCATATATTTA  
CAGTAGATAGATGTAGATACCCGAGCTTACTTCACTTCAGCACCTATGATTATTG  
CGGTTCCAACCTGGGATTAAGTCTTTAGATGACTAGCCACCTTTTCATGGAECTCA  
AATTTTAAATAGACCAGTAACCCTGTGAGCTTTAGGTTTTGTATTTTTATTTACAG  
TAGGAGGATTAACAGGGGGTAATTTTAGCTAATTCTTCAATTGATATTATTCTTCAC  
GATACTTACTATGTAGTAGCTCATTTTTCACTATGTTCTTTCTATAGGAGCTGTATT  
TGCAATTATAGCCGGAATTGTCCAATGATTCCCATTATTTACTGGACTAACCTTA  
ATAAATTTTTTTTTAAAAACCCAATTTATTACTATATTTTTAGGTGTAAATTTAACAT  
TTTTTCCTCAACACTTTTTAGGGCTAAGAGGAATGCCTCGGCGATATTCGGATTA  
TCCAGATGCTTTCACTATCTGAAATGCCATTTTCATCTATTGGTTCCATTATTTCTC  
TCACAAGAATTATCTTTTTTTTTATTTATCTTATGAGAAAGGCTTTCTTCCCAACGT  
AAATCTTTGAGAACTTTAAATGTAACAACCTTCAATTGAATGGTTCAAGCCCTACC  
CCCTAGTG

MEX\_SJS\_2

ATTATTAGACAAGAAAGGGGGAAAAAAGAACCTTTTGGACCTTAGGAATAATTTA  
TGCCATAATAGCTATCGGATTATTAGGATTTCGTAGTTTGAGCTCACCATATATTTA  
CAGTAGATAGATGTAGATACCCGAGCTTACTTCACTTCAGCAACTATAATTATTG  
CGGTTCCAACCTGGAATTAAGTCTTTAGATGACTAGCCACCTTTTCATGGAECTCA  
AATTTTAAATAGACCAGTAACCCTGTGAGCTTTAGGTTTTGTATTTTTATTTACAG  
TAGGAGGATTAACAGGGGGTAATTTTAGCTAATTCTTCAATTGATATTATTCTTCAC  
GATACTTACTATGTAGTAGCTCATTTTTCACTATGTTCTTTCTATAGGAGCTGTATT  
TGCAATTATAGCCGGAATTGTCCAATGATTCCCATTATTTACTGGACTAACCTTA  
ATAAATTTTTTTTTAAAAACCCAATTTATTACTATATTTTTAGGTGTAAATTTAACAT  
TTTTTCCTCAACACTTTTTAGGGCTAAGAGGAATGCCTCGGCGATATTCGGATTA  
TCCAGATGCTTTCACTATCTGAAATGCCATTTTCATCTATTGGTTCCATTATTTCTC  
TCACAAGAATTATCTTTTTTTTTATTTATCTTATGAGAAAGGCTTTCTTCCCAACGT  
AAATCTTTGAGAACTTTAAATGTAACAACCTTCAATTGAATGGTTCAAGCCCTACC  
CCCTAGTG

MEX\_STO

ATTATTAGACAAGAAAGGGGGAAAAAAGAACCTTTTGGACCTTAGGAATAATTTA  
TGCCATAATAGCTATCGGATTATTAGGATTTCGTAGTTTGAGCTCACCATATATTTA  
CAGTAGATAGATGTAGATACCCGAGCTTACTTCACTTCAGCAACTATAATTATTG  
CGGTTCCAACCTGGGATTAAGTCTTTAGATGACTAGCCACCTTTTCATGGAECTCA  
AATTTTAAATAGACCAGTAACCCTGTGAGCTTTAGGTTTTGTATTTTTATTTACAG  
TAGGAGGATTAACAGGGGGTAATTTTAGCTAATTCTTCAATTGATATTATTCTTCAC  
GATACTTACTATGTAGTAGCTCATTTTTCACTATGTTCTTTCTATAGGAGCTGTATT  
TGCAATTATAGCCGGAATTGTCCAATGATTCCCATTATTTACTGGACTAACCTTA  
ATAAATTTTTTTTTAAAAACCCAATTTATTACTATATTTTTAGGTGTAAATTTAACAT  
TTTTTCCTCAACACTTTTTAGGGCTAAGAGGAATGCCTCGGCGATATTCGGATTA  
TCCAGATGCTTTCACTATCTGAAATGCCATTTTCATCTATTGGTTCCATTATTTCTC

TCACAAGAATTATCTTTTTTTTATTTATCTTATGAGAAAGGCTTTCTTCCCAACGT  
AAATCTTTGAGAACTTTAAATGTAACAACCTTCAATTGAATGGTTCAAGCCCTACC  
CCCTAGTG

MEX\_TLA\_1

ATTATTAGACAAGAAAGGGGGGAAAAAAGAAGCTTTTGGACCTTAGGAATAATTTA  
TGCCATAATAGCTATCGGATTATTAGGATTTCGTAGTTTGAGCTCACCATATATTTA  
CAGTAGATAGATGTAGATACCCGAGCTTACTTCACTTCAGCACCTATGATTATTG  
CGGTTCCAACCTGGGATTAAGTCTTTAGATGACTAGCCACCTTTTCATGGAACCTCA  
AATTTTAAATAGACCAGTAACCCTGTGAGCTTTAGGTTTTGTATTTTTATTTACAG  
TAGGAGGATTAACAGGGGTAATTTTAGCTAATTCTTCAATTGATATTATTCTTCAC  
GATACTTACTATGTAGTAGCTCATTTTCACTATGTTCTTTCTATAGGAGCTGTATT  
TGCAATTATAGCCGGAATTGTCCAATGATTCCCATTATTTACTGGACTAACCTTA  
ATAATTTTTTTTTTAAAAACCCAATTTATTACTATATTTTTAGGTGTAAATTTAACAT  
TTTTTCCTCAACACTTTTTAGGGCTAAGAGGAATGCCTCGGCGATATTCGGATTA  
TCCAGATGCTTTCACTATCTGAAATGCCATTTTCATCTATTGGTTCCATTATTTCTC  
TCACAAGAATTATCTTTTTTTTATTTATCTTATGAGAAAGGCTTTCTTCCCAACGT  
AAATCTTTGAGAACTTTAAATGTAACAACCTTCAATTGAATGGTTCAAGCCCTACC  
CCCTAGTG

MEX\_XOT\_3

ATTATTAGACAAGAAAGGGGGGAAAAAAGAAGCTTTTGGACCTTAGGAATAATTTA  
TGCCATGATAGCTATCGGATTATTAGGATTTCGTAGTTTGAGCTCACCATATATTT  
ACAGTAGATAGATGTAGATACCCGAGCTTACTTCACTTCAGCAACTATAATTATT  
GCGGTTCCAACCTGGGATTAAGTCTTTAGATGACTAGCCACCTTTTCATGGAACCT  
CAAATTTTAAATAGACCAGTAACCCTGTGAGCTTTAGGCTTTGTATTTTTATTTAC  
AGTAGGAGGATTAACAGGGGTAATTTTAGCTAATTCTTCAATTGATATTATTCTTC  
ACGATACTTACTATGTAGTAGCTCATTTTCACTATGTTCTTTCTATAGGAGCTGTA  
TTTGCAATTATAGCCGGAATTGTCCAATGATTTCCATTATTTACTGGACTAACCTT  
AAATAATTTTTTTTTTAAAAACCCAATTTATTACTATATTTTTAGGTGTAAATTTAACA  
TTTTTCCTCAACACTTTTTAGGGCTAAGAGGAATGCCTCGGCGATATTCGGATT  
ATCCAGATGCTTTCACTATCTGAAATGCCATTTTCATCTATTGGTTCCATTATTTCT  
CTCACAAGAATTATCTTTTTTTTATTTATCTTATGAGAAAGGCTTTCTTCCCAACG  
TAAATCTTTGAGAACTTTAAATGTAACAACCTTCAATTGAATGGTTCAAGCCCTACC  
CCCTAGTG

MEX\_MAL\_1

ATTATTAGACAAGAAAGGGGGGAAAAAAGAAGCTTTTGGACCTTAGGAATAATTTA  
TGCCATAATAGCTATCGGATTATTAGGATTTCGTAGTTTGAGCTCACCATATATTTA  
CAGTAGATAGATGTAGATACCCGAGCTTACTTCACTTCAGCAACTATAATTATTG  
CGGTTCCAACCTGGGATTAAGTCTTTAGATGACTAGCCACCTTTTCATGGAACCTCA  
AATTTTAAATAGACCAGTAACCCTGTGAGCTTTAGGTTTTGTATTTTTATTTACAG  
TAGGAGGATTAACAGGGGTAATTTTAGCTAATTCTTCAATTGATATTATTCTTCAC  
GATACTTACTATGTAGTAGCTCATTTTCACTATGTTCTTTCTATAGGAGCTGTATT  
TGCAATTATAGCCGGAATTGTCCAATGATTCCCATTATTTACTGGACTAACCTTA  
ATAATTTTTTTTTTAAAAACCCAATTTATTACTATATTTTTAGGTGTAAATTTAACAT  
TTTTTCCTCAACACTTTTTAGGGCTAAGAGGAATGCCTCGGCGATATTCGGATTA  
TCCAGATGCTTTCACTATCTGAAATGCCATTTTCATCTATTGGTTCCATTATTTCTC  
TCACAAGAATTATCTTTTTTTTATTTATCTTATGAGAAAGGCTTTCTTCCCAACGT  
AAATCTTTGAGAACTTTAAATGTAACAACCTTCAATTGAATGGTTCAAGCCCTACC  
CCCTAGTG

MEX\_MAL\_2

ATTATTAGACAAGAAAGGGGGGAAAAAAGAAGCTTTTGGACCTTAGGAATAATTTA

TGCCATAATAGCTATGGGATTATTAGGATTCGTCGTTTGAGCTCACCATATATTT  
ACAGTAGATAGATGTAGATACCCGAGCTTACTTCACTTCAGCAACTATAATTATT  
GCGGTTCCAACCTGGGATTAAGTCTTTAGATGACTAGCCACCTTTCATGGAACCT  
CAAATTTTAAATAGACCAGTAACCCTGTGAGCTTTAGGTTTTGTATTTTTATTTAC  
AGTAGGAGGATTAACAGGGGTAATTTAGCTAATTCTTCAATTGATATTATTCTTC  
ACGATACTTACTATGTAGTAGCTCATTTTCACTATGTTCTTTCTATAGGAGCTGTA  
TTTGCAATTATAGCCGGAATTGTCCAATGATTCCCATTATTTACTGGACTAACCTT  
AAATAATTTTTTTTTTAAAAACCCAATTTATTACTATATTTTTTAGGTGTAAATTTAACA  
TTTTTTCCTCAACACTTTTTAGGGCTAAGAGGAATGCCTCGGCGATATTCGGATT  
ATCCAGATGCTTTCACTATCTGAAATGCCATTTTCATCCATTGGTTCCATTATTTCT  
CTCACAAGAATTATCTTTTTTTTTATTTATCCTATGAGAAAGGCTTTCTTCCCAACG  
TAAATCTTTGAGAACTTTAAATGTAACAACCTTCAATTGAATGGTTCAAGCCCTACC  
CCCTAGTG

MEX\_OCU\_1

ATTATTAGACAAGAAAGGGGGGAAAAAAGAAGCTTTTGGACCTTAGGAATAATTTA  
TGCCATAATAGCTATCGGATTATTAGGATTCGTAGTTTGAGCTCACCATATATTTA  
CAGTAGATAGATGTAGATACCCGAGCTTACTTCACTTCAGCAACTATAATTATTG  
CGGTTCCAACCTGGGATTAAGTCTTTAGATGACTAGCCACCTTTCATGGAACCTCA  
AATTTTAAATAGACCAGTAACCCTGTGAGCTTTAGGTTTTGTATTTTTATTTACAG  
TAGGAGGATTAACAGGGGTAATTTAGCTAATTCTTCAATTGATATTATTCTTCAC  
GATACTTACTATGTAGTAGCTCATTTTCACTATGTTCTTTCTATAGGAGCTGTATT  
TGCAATTATAGCCGGAATTGTCCAATGATTCCCATTATTTACTGGACTAACCTTA  
AATAATTTTTTTTTTAAAAACCCAATTTATTACTATATTTTTAGGTGTAAATTTAACAT  
TTTTTTCCTCAACACTTTTTAGGGCTAAGAGGAATGCCTCGGCGATATTCGGATTA  
TCCAGATGCTTTCACTATCTGAAATGCCATTTTCATCTATTGGTTCCATTATTTCTC  
TCACAAGAATTATCTTTTTTTTTATTTATCTTATGAGAAAGGCTTTCTTCCCAACGT  
AAATCTTTGAGAACTTTAAATGTAACAACCTTCAATTGAATGGTTCAAGCCCTACC  
CCCTAGTG

MEX\_OCU\_2

ATTATTAGACAAGAAAGGGGGGAAAAAAGAAGCTTTTGGACCTTAGGAATAATTTA  
TGCCATAATAGCTATCGGATTATTAGGATTCGTAGTTTGAGCTCACCATATATTTA  
CAGTAGATAGATGTAGATACCCGAGCTTACTTCACTTCAGCAACTATAATTATTG  
CGGTTCCAACCTGGGATTAAGTCTTTAGATGACTAGCCACCTTTCATGGAACCTCA  
AATTTTAAATAGACCAGTAACCCTGTGAGCTTTAGGTTTTGTATTTTTATTTACAG  
TAGGAGGATTAACAGGGGTAATTTAGCTAATTCTTCAATTGATATTATTCTTCAC  
GATACTTACTATGTAGTAGCTCATTTTCACTATGTTCTTTCTATAGGAGCTGTATT  
TGCAATTATAGCCGGAATTGTCCAATGATTCCCATTATTTACTGGACTAACCTTA  
AATAATTTTTTTTTTAAAAACCCAATTTATTACTATATTTTTAGGTGTAAATTTAACAT  
TTTTTTCCTCAACACTTTTTAGGGCTAAGAGGAATGCCTCGGCGATATTCGGATTA  
TCCAGATGCTTTCACTATCTGAAATGCCATTTTCATCTATTGGTTCCATTATTTCTC  
TCACAAGAATTATCTTTTTTTTTATTTATCTTATGAGAAAGGCTTTCTTCCCAACGT  
AAATCTTTGAGAACTTTAAATGTAACAACCTTCAATTGAATGGTTCAAGCCCTACC  
CCCTAGTG

MEX\_SAG\_1

ATTATTAGACAAGAAAGGGGGGAAAAAAGAAGCTTTTGGACCTTAGGAATAATTTA  
TGCCATAATAGCTATCGGATTATTAGGATTCGTAGTTTGAGCTCACCATATATTTA  
CAGTAGATAGATGTAGATACCCGAGCTTACTTCACTTCAGCAACTATAATTATTG  
CGGTTCCAACCTGGGATTAAGTCTTTAGATGACTAGCCACCTTTCATGGAACCTCA  
AATTTTAAATAGACCAGTAACCCTGTGAGCTTTAGGTTTTGTATTTTTATTTACAG  
TAGGAGGATTAACAGGGGTAATTTAGCTAATTCTTCAATTGATATTATTCTTCAC

GATACTTACTATGTAGTAGCTCATTTTCACTATGTTCTTTCTATAGGAGCTGTATT  
TGCAATTATAGCCGGAATTGTCCAATGATTCCCATTATTTACTGGGCTAACCTTA  
ATAAATTTTTTTTTAAAAACCCAATTTATTACTATATTTTTAGGTGTAAATTTAACAT  
TTTTTCCTCAACACTTTTTAGGGCTAAGAGGAATGCCTCGGCGATATTCGGATTA  
TCCAGATGCTTTCACTATCTGAAATGCCATTTTCATCTATTGGTTCCATTATTTCTC  
TCACAAGAATTATCTTTTTTTTTATTTATCTTATGAGAAAGGCTTTCTTCCCAACGT  
AAATCTTTGAGAACTTTAAATGTAACAACCTTCAATTGAATGGTTCAAGCCCTACC  
CCCTAGTG

MEX\_SAG\_2

ATTATTAGACAAGAAAGGGGGAAAAAAGAAGCTTTTGGACCTTAGGAATAATTTA  
TGCCATAATAGCTATCGGATTATTAGGATTTCGTAGTTTGAGCTCACCATATATTTA  
CAGTAGATAGATGTAGATACCCGAGCTTACTTCACTTCAGCAACTATAATTATTG  
CGGTTCCAACCTGGGATTAAGTCTTTAGATGACTAGCCACCTTTTCATGGAECTCA  
AATTTTAAATAGACCAGTAACCCTGTGAGCTTTAGGTTTTGTATTTTTATTTACAG  
TAGGAGGATTAACAGGGGGTAATTTTAGCTAATTCTTCAATTGATATTATTCTTCAC  
GATACTTACTATGTAGTAGCTCATTTTCACTATGTTCTTTCTATAGGAGCTGTATT  
TGCAATTATAGCCGGAATTGTCCAATGATTCCCATTATTTACTGGGCTAACCTTA  
ATAAATTTTTTTTTAAAAACCCAATTTATTACTATATTTTTAGGTGTAAATTTAACAT  
TTTTTCCTCAACACTTTTTAGGGCTAAGAGGAATGCCTCGGCGATATTCGGATTA  
TCCAGATGCTTTCACTATCTGAAATGCCATTTTCATCTATTGGTTCCATTATTTCTC  
TCACAAGAATTATCTTTTTTTTTATTTATCTTATGAGAAAGGCTTTCTTCCCAACGT  
AAATCTTTGAGAACTTTAAATGTAACAACCTTCAATTGAATGGTTCAAGCCCTACC  
CCCTAGTG

MEX\_SJC\_1

ATTATTAGACAAGAAAGGGGGAAAAAAGAAGCTTTTGGACCTTAGGAATAATTTA  
TGCCATAATAGCTATCGGATTATTAGGATTTCGTAGTTTGAGCTCACCATATATTTA  
CAGTAGATAGATGTAGATACCCGAGCTTACTTCACTTCAGCAACTATAATTATTG  
CGGTTCCAACCTGGGATTAAGTCTTTAGATGACTAGCCACCTTTTCATGGAECTCA  
AATTTTAAATAGACCAGTAACCCTGTGAGCTTTAGGTTTTGTATTTTTATTTACAG  
TAGGAGGATTAACAGGGGGTAATTTTAGCTAATTCTTCAATTGATATTATTCTTCAC  
GATACTTACTATGTAGTAGCTCATTTTCACTATGTTCTTTCTATAGGAGCTGTATT  
TGCAATTATAGCCGGAATTGTCCAATGATTCCCATTATTTACTGGACTAACCTTA  
ATAAATTTTTTTTTAAAAACCCAATTTATTACTATATTTTTAGGTGTAAATTTAACAT  
TTTTTCCTCAACACTTTTTAGGGCTAAGAGGAATGCCTCGGCGATATTCGGATTA  
TCCAGATGCTTTCACTATCTGAAATGCCATTTTCATCTATTGGTTCCATTATTTCTC  
TCACAAGAATTATCTTTTTTTTTATTTATCTTATGAGAAAGGCTTTCTTCCCAACGT  
AAATCTTTGAGAACTTTAAATGTAACAACCTTCAATTGAATGATTCAAGCCCTACCC  
CCTAGTG

MEX\_SJC\_2

ATTATTAGACAAGAAAGGGGGAAAAAAGAAGCTTTTGGACCTTAGGAATAATTTA  
TGCCATAATAGCTATCGGATTATTAGGATTTCGTAGTTTGAGCTCACCATATATTTA  
CAGTAGATAGATGTAGATACCCGAGCTTACTTCACTTCAGCAACTATAATTATTG  
CGGTTCCAACCTGGGATTAAGTCTTTAGATGACTAGCCACCTTTTCATGGAECTCA  
AATTTTAAATAGACCAGTAACCCTGTGAGCTTTAGGTTTTGTATTTTTATTTACAG  
TAGGAGGATTAACAGGGGGTAATTTTAGCTAATTCTTCAATTGATATTATTCTTCAC  
GATACTTACTATGTAGTAGCTCATTTTCACTATGTTCTTTCTATAGGAGCTGTATT  
TGCAATTATAGCCGGAATTGTCCAATGATTCCCATTATTTACTGGACTAACCTTA  
ATAAATTTTTTTTTAAAAACCCAATTTATTACTATATTTTTAGGTGTAAATTTAACAT  
TTTTTCCTCAACACTTTTTAGGGCTAAGAGGAATGCCTCGGCGATATTCGGATTA  
TCCAGATGCTTTCACTATCTGAAATGCCATTTTCATCTATTGGTTCCATTATTTCTC

TCACAAGAATTATCTTTTTTTTTATTTATCTTATGAGAAAGGCTTTCTTCCCAACGT  
AAATCTTTGAGAACTTTAAATGTAACAACCTTCAATTGAATGGTTCAAGCCCTACC  
CCCTAGTG

MEX\_SJC\_3

ATTATTAGACAAGAAAGGGGGGAAAAAAGAAGCTTTTGGACCTTAGGAATAATTTA  
TGCCATAATAGCTATCGGATTATTAGGATTTCGTAGTTTGAGCTCACCATATATTTA  
CAGTAGATAGATGTAGATACCCGAGCTTACTTCACTTCAGCAACTATAATTATTG  
CGGTTCCAACCTGGGATTAAGTCTTTAGATGACTAGCCACCTTTCATGGAACTCA  
AATTTTAAATAGACCAGTAACCCTGTGAGCTTTAGGTTTTGTATTTTTATTTACAG  
TAGGAGGATTAACAGGGGTAAATTTAGCTAATTCTTCAATTGATATTATTCTTCAC  
GATACTTACTATGTAGTAGCTCATTTTCACTATGTTCTTTCTATAGGAGCTGTATT  
TGCAATTATAGCCGGAATTGTCCAATGATTCCCATTATTTACTGGACTAACCTTA  
ATAAATTTTTTTTTAAAAACCCAATTTATTACTATATTTTTAGGTGTAAATTTAACAT  
TTTTTCCTCAACACTTTTTAGGGCTAAGAGGAATGCCTCGGCGATATTCGGATTA  
TCCAGATGCTTTCACTATCTGAAATGCCATTTTCATCTATTGGTTCCATTATTTCTC  
TCACAAGAATTATCTTTTTTTTTATTTATCTTATGAGAAAGGCTTTCTTCCCAACGT  
AAATCTTTGAGAACTTTAAATGTAACAACCTTCAATTGAATGGTTCAAGCCCTACC  
CCCTAGTG

MEX\_SJS

ATTATTAGACAAGAAAGGGGGGAAAAAAGAACCTTTTGGACCTTAGGAATAATTTA  
TGCCATAATAGCTATCGGATTATTAGGATTTCGTAGTTTGAGCTCACCATATATTTA  
CAGTAGATAGATGTAGATACCCGAGCTTACTTCACTTCAGCAACTATAATTATTG  
CGGTTCCAACCTGGAATTAAGTCTTTAGATGACTAGCCACCTTTCATGGAACTCA  
AATTTTAAATAGACCAGTAACCCTGTGAGCTTTAGGTTTTGTATTTTTATTTACAG  
TAGGAGGATTAACAGGGGTAAATTTAGCTAATTCTTCAATTGATATTATTCTTCAC  
GATACTTACTATGTAGTAGCTCATTTTCACTATGTTCTTTCTATAGGAGCTGTATT  
TGCAATTATAGCCGGAATTGTCCAATGATTCCCATTATTTACTGGACTAACCTTA  
ATAAATTTTTTTTTAAAAACCCAATTTATTACTATATTTTTAGGTGTAAATTTAACAT  
TTTTTCCTCAACACTTTTTAGGGCTAAGAGGAATGCCTCGGCGATATTCGGATTA  
TCCAGATGCTTTCACTATCTGAAATGCCATTTTCATCTATTGGTTCCATTATTTCTC  
TCACAAGAATTATCTTTTTTTTTATTTATCTTATGAGAAAGGCTTTCTTCCCAACGT  
AAATCTTTGAGAACTTTAAATGTAACAACCTTCAATTGAATGGTTCAAGCCCTACC  
CCCTAGTG

MEX\_SJS\_1

ATTATTAGACAAGAAAGGGGGGAAAAAAGAAGCTTTTGGACCTTAGGAATAATTTA  
TGCCATAATACCTATCGGATTATTAGGATTTCGTCTGTTTGAGCTCACCATATATTTA  
CAGTAGATAGATGTAGATACCCGAGCTTACTTCACTTCAGCAACTATAATTATTG  
CGGTTCCAACCTGGGATTAAGTCTTTAGATGACTAGCCACCTTTCATGGAACTCA  
AATTTTAAATAGACCAGTAACCCTGTGAGCTTTAGGTTTTGTATTTTTATTTACAG  
TAGGAGGATTAACAGGGGTAAATTTAGCTAATTCTTCAATTGATATTATTCTTCAC  
GATACTTACTATGTAGTAGCTCATTTTCACTATGTTCTTTCTATAGGAGCTGTATT  
TGCAATTATAGCCGGAATTATCCAATGATTCCCATTATTTACTGGACTAACCTTAA  
ATAATTTTTTTTTAAAAACCCAATTTATTACTATATTTTTAGGTGTAAATTTAACATT  
TTTTTCCTCAACACTTTTTAGGGCTAAGAGGAATGCCTCGGCGATATTCGGATTAT  
CCAGATGCTTTCACTATCTGAAATGCCATTTTCATCCATTGGTTCCATTATTTCTCT  
CACAAGAATTATCTTTTTTTTTATTTATCTTATGAGAAAGGCTTTCTTCCCAACGTA  
AATCTTTGAGAACTTCAAATGTAACAACCTTCAATTGAATGGTGCAAGCCCTACCC  
CCTAGTG

MEX\_SJS\_3

ATTATTAGACAAGAAAGGGGGGAAAAAAGAAGCTTTTGGACCTTAGGAATAATTTA

TGCCATAATACCTATCGGATTATTAGGATTCGTCGTTTGAGCTCACCATATATTTA  
CAGTAGATAGATGTAGATACCCGAGCTTACTTCACTTCAGCAACTATAATTATTG  
CGGTTCCAACCTGGGATTAAGTCTTTAGATGACTAGCCACCTTTCATGGAACCTCA  
AATTTTAAATAGACCAGTAACCCTGTGAGCTTTAGGTTTTGTATTTTTATTTACAG  
TAGGAGGATTAACAGGGGTAATTTTAGCTAATTCTTCAATTGATATTATTCTTCAC  
GATACTTACTATGTAGTAGCTCATTTTCACTATGTTCTTTCTATAGGAGCTGTATT  
TGCAATTATAGCCGGAATTATCCAATGATTCCCATTATTTACTGGACTAACCTTAA  
ATAATTTTTTTTTTAAAAACCCAATTTATTACTATATTTTTTAGGTGTAAATTTAACATT  
TTTTCTCAACACTTTTTAGGGCTAAGAGGAATGCCTCGGCGATATTCGGATTAT  
CCAGATGCTTTCCTATCTGAAATGCCATTTTCATCCATTGGTTCCATTATTTCTCT  
CACAAGAATTATCTTTTTTTTTATTTATCTTATGAGAAAGGCTTTCTTCCCAACGTA  
AATCTTTGAGAACTTCAAATGTAACAACCTTCAATTGAATGGTGCAAGCCCTACCC  
CCTAGTG

MEX\_SPT\_1

ATTATTAGACAAGAAAGGGGGGAAAAAAGAAGCTTTTGGACCTTAGGAATAATTTA  
TGCCATAATAGCTATCGGATTATTAGGATTCGTAGTTTGAGCTCACCATATATTTA  
CAGTAGATAGATGTAGATACCCGAGCTTACTTCACTTCAGCAACTATAATTATTG  
CGGTTCCAACCTGGGATTAAGTCTTTAGATGACTAGCCACCTTTCATGGAACCTCA  
AATTTTAAATAGACCAGTAACCCTGTGAGCTCTAGGTTTTGTATTTTTATTTACAG  
TAGGAGGATTAACAGGGGTAATTTTAGCTAATTCTTCAATTGATATTATTCTTCAC  
GATACTTACTATGTAGTAGCTCATTTTCACTATGTTCTTTCTATAGGAGCTGTATT  
TGCAATTATAGCCGGAATTGTCCAATGATTCCCATTATTTACTGGACTAACCTTA  
AATAATTTTTTTTTTAAAAACCCAATTTATTACTATATTTTTTAGGTGTAAATTTAACAT  
TTTTCTCAACACTTTTTAGGGCTAAGAGGAATGCCTCGGCGATATTCGGATTAT  
TCCAGATGCTTTCCTATCTGAAATGCCATTTTCATCTATTGGTTCCATTATTTCTC  
TCACAAGAATTATCTTTTTTTTTATTTATCTTATGAGAAAGGCTTTCTTCCCAACGT  
AAATCTTTGAGAACTTTAAATGTAACAACCTTCAATTGAATGGTTCAAGCCCTACC  
CCCTAGTG

MEX\_SPT\_2

ATTATTAGACAAGAAAGGGGGGAAAAAAGAAGCTTTTGGACCTTAGGAATAATTTA  
TGCCATAATAGCTATCGGATTATTAGGATTCGTAGTTTGAGCTCACCATATATTTA  
CAGTAGATAGATGTAGATACCCGAGCTTACTTCACTTCAGCAACTATAATTATTG  
CGGTTCCAACCTGGGATTAAGTCTTTAGATGACTAGCCACCTTTCATGGAACCTCT  
AATTTTAAATAGACCAGTAACCCTATGAGCTTTAGGTTTTGTATTTTTATTTACAG  
TAGGAGGTTTAAACAGGAGTAATTTTAGCTAATTCTTCAATTGATATTATTCTTCAC  
GATACTTACTATGTAGTAGCTCATTTTCACTATGTTCTTTCTATAGGAGCTGTATT  
TGCAATTATAGCCGGAATTGTCCAATGATTCCCATTATTTACTGGACTAACCTTA  
AATAATTTTTTTTTTAAAAACCCAATTTATTACTATATTTTTTAGGTGTAAATTTAACAT  
TTTTCTCAACACTTTTTAGGGCTAAGAGGAATGCCTCGGCGATATTCGGATTAT  
TCCAGATGCTTTCCTATCTGAAATGCCATTTTCATCTATTGGTTCTATTATTTCTC  
TCACAAGAATTATCTTTTTTTTTATTTATCTTATGAGAAAGGCTTTCTTCCCAACGT  
AAATCTTTGAGAACTTTAAATGTAACAACCTTCAATTGAATGGTTCAAGCCCTACC  
CCCTAGTG

MEX\_SPT\_3

ATTATTAGACAAGAAAGGGGGGAAAAAAGAAGCTTTTGGACCTTAGGAATAATTTA  
TGCCATAATAGCTATCGGATTATTAGGATTCGTAGTTTGAGCTCACCATATATTTA  
CAGTAGATAGATGTAGATACCCGAGCTTACTTCACTTCAGCAACTATAATTATTG  
CGGTTCCAACCTGGGATTAAGTCTTTAGATGACTAGCCACCTTTCATGGAACCTCT  
AATTTTAAATAGACCAGTAACCCTATGAGCTTTAGGTTTTGTATTTTTATTTACAG  
TAGGAGGTTTAAACAGGAGTAATTTTAGCTAATTCTTCAATTGATATTATTCTTCAC



GATACTTACTATGTAGTAGCTCATTTTTCACTATGTTCTTTCTATAGGAGCTGTATT  
TGCAATTATAGCCGGAATTGTCCAATGATTCCCATTATTTACTGGACTAACCTTA  
ATAAATTTTTTTTTAAAAACCCAATTTATTACTATATTTTTAGGTGTAAATTTAACAT  
TTTTTCCTCAACACTTTTTAGGGCTAAGAGGAATGCCTCGGCGATATTCGGATTA  
TCCAGATGCTTTCACTATCTGAAATGCCATTTTCATCTATTGGTTCTATTATTTCTC  
TCACAAGAATTATCTTTTTTTTTATTTATCTTATGAGAAAGGCTTTCTTCCCAACGT  
AAATCTTTGAGAACTTTAAATGTAACAACCTTCAATTGAATGGTTCAAGCCCTACC  
CCCTAGTG

MEX\_TEP

ATTATTAGACAAGAAAGGGGGAAAAAAGAAGCTTTTGGACCTTAGGAATAATTTA  
TGCCATAATAGCTATCGGATTATTAGGATTTCGTAGTTTGAGCTCACCATATATTTA  
CAGTAGATAGATGTAGATACCCGAGCTTACTTCACTTCAGCAACTATAATTATTG  
CGGTTCCAACCTGGGATTAAGTCTTTAGATGACTAGCCACCTTTTCATGGAACCTCA  
AATTTTAAATAGACCAGTAACCCTGTGAGCTTTAGGTTTTGTATTTTTATTTACAG  
TAGGAGGATTAACAGGGGGTAATTTTAGCTAATTCTTCAATTGATATTATTCTTCAC  
GATACTTACTATGTAGTAGCTCATTTTTCACTATGTTCTTTCTATAGGAGCTGTATT  
TGCAATTATAGCCGGAATTGTCCAATGATTCCCATTATTTACTGGACTAACCTTA  
ATAAATTTTTTTTTAAAAACCCAATTTATTACTATATTTTTAGGTGTAAATTTAACAT  
TTTTTCCTCAACACTTTTTAGGGCTAAGAGGAATGCCTCGGCGATATTCGGATTA  
TCCAGATGCTTTCACTATCTGAAATGCCATTTTCATCTATTGGTTCCATTATTTCTC  
TCACAAGAATTATCTTTTTTTTTATTTATCTTATGAGAAAGGCTTTCTTCCCAACGT  
AAATCTTTGAGAACTTTAAATGTAACAACCTTCAATTGAATGGTTCAAGCCCTACC  
CCCTAGTG

MEX\_TEP\_1

ATTATTAGACAAGAAAGGGGGAAAAAAGAAGCTTTTGGACCTTAGGAATAATTTA  
TGCCATAATAGCTATCGGATTATTAGGATTTCGTAGTTTGAGCTCACCATATATTTA  
CAGTAGATAGATGTAGATACCCGAGCTTACTTCACTTCAGCAACTATAATTATTG  
CGGTTCCAACCTGGGATTAAGTCTTTAGATGACTAGCCACCTTTTCATGGAACCTCA  
AATTTTAAATAGACCAGTAACCCTGTGAGCTTTAGGTTTTGTATTTTTATTTACAG  
TAGGAGGATTAACAGGGGGTAATTTTAGCTAATTCTTCAATTGATATTATTCTTCAC  
GATACTTACTATGTAGTAGCTCATTTTTCACTATGTTCTTTCTATAGGAGCTGTATT  
TGCAATTATAGCCGGAATTGTCCAATGATTCCCATTATTTACTGGACTAACCTTA  
ATAAATTTTTTTTTAAAAACCCAATTTATTACTATATTTTTAGGTGTAAATTTAACAT  
TTTTTCCTCAACACTTTTTAGGGCTAAGAGGAATGCCTCGGCGATATTCGGATTA  
TCCAGATGCTTTCACTATCTGAAATGCCATTTTCATCTATTGGTTCCATTATTTCTC  
TCACAAGAATTATCTTTTTTTTTATTTATCTTATGAGAAAGGCTTTCTTCCCAACGT  
AAATCTTTGAGAACTTTAAATGTAACAACCTTCAATTGAATGGTTCAAGCCCTACC  
CCCTAGTG

MEX\_TEP\_2

ATTATTAGACAAGAAAGGGGGAAAAAAGAAGCTTTTGGACCTTAGGAATAATTTA  
TGCCATAATAGCTATCGGATTATTAGGATTTCGTAGTTTGAGCTCACCATATATTTA  
CAGTAGATAGATGTAGATACCCGAGCTTACTTCACTTCAGCAACTATAATTATTG  
CGGTTCCAACCTGGGATTAAGTCTTTAGATGACTAGCCACCTTTTCATGGAACCTCA  
AATTTTAAATAGACCAGTAACCCTGTGAGCTTTAGGTTTTGTATTTTTATTTACAG  
TAGGAGGATTAACAGGGGGTAATTTTAGCTAATTCTTCAATTGATATTATTCTTCAC  
GATACTTACTATGTAGTAGCTCATTTTTCACTATGTTCTTTCTATAGGAGCTGTATT  
TGCAATTATAGCCGGAATTGTCCAATGATTTCCATTATTTACTGGACTAACCTTAA  
ATAATTTTTTTTTAAAAACCCAATTTATTACTATATTTTTAGGTGTAAATTTAACATT  
TTTTTCCTCAACACTTTTTAGGGCTAAGAGGAATGCCTCGGCGATATTCGGATTAT  
CCAGATGCTTTCACTATCTGAAATGCCATTTTCATCTATTGGTTCCATTATTTCTCT

CACAAGAATTATCTTTTTTTTATTTATCTTATGAGAAAGGCTTTCTTCCCAACGTA  
AATCTTTGAGAACTTTAAATGTAACAACCTTCAATTGAATGGTTCAAGCCCTACCC  
CCTAGTG

MEX\_TLA

ATTATTAGACAAGAAAGGGGGGAAAAAAGAAGCTTTTGGACCTTAGGAATAATTTA  
TGCCATAATAGCTATCGGATTATTAGGATTCGTAGTTTGAGCTCACCATATATTTA  
CAGTAGATAGATGTAGATACCCGAGCTTACTTCACTTCAGCACCTATGATTATTG  
CGGTTCCAACCTGGGATTAAGTCTTTAGATGACTAGCCACCTTTTCATGGAACCTCA  
AATTTTAAATAGACCAGTAACCCTGTGAGCTTTAGGTTTTGTATTTTTATTTACAG  
TAGGAGGATTAACAGGGGTAAATTTAGCTAATTCTTCAATTGATATTATTCTTCAC  
GATACTTACTATGTAGTAGCTCATTTTCACTATGTTCTTTCTATAGGAGCTGTATT  
TGCAATTATAGCCGGAATTGTCCAATGATTCCCATTATTTACTGGACTAACCTTA  
ATAAATTTTTTTTTAAAAACCCAATTTATTACTATATTTTTAGGTGTAATTTAACAT  
TTTTTCCTCAACACTTTTTAGGGCTAAGAGGAATGCCTCGGCGATATTCGGATTA  
TCCAGATGCTTTCACTATCTGAAATGCCATTTTCATCTATTGGTTCCATTATTTCTC  
TCACAAGAATTATCTTTTTTTTATTTATCTTATGAGAAAGGCTTTCTTCCCAACGT  
AAATCTTTGAGAACTTTAAATGTAACAACCTTCAATTGAATGGTTCAAGCCCTACC  
CCCTAGTG

MEX\_TLA\_2

ATTATTAGACAAGAAAGGGGGGAAAAAAGAACCTTTTGGACCTTAGGAATAATTTA  
TCCCTTATTACCTATCGGATTATTAGGATTCGTCTGTTTGAGCTCACCATATCTTTA  
CAGTAGATAGCTGTAGATACCCGAGCTTACTTCACTTCAGCAACTATAATTATTG  
CGGTTCCAACCTGGGATTAAGTCTTTAGATGACTAGCCACCTTTTCATGGAACCTCA  
AATTTTAAATAGACCAGTAACCCTGTGAGCTTTAGGTTTTGTATTTTTATTTACAG  
TAGGAGGATTAACAGGGGTAAATTTAGCTAATTCTTCAATTGATATTATTCTTCAC  
GATACTTACTATGTAGTAGCTCATTTTCACTATGTTCTTTCTATAGGAGCTGTATT  
TGCAATTATAGCCGGAATTAGCCAATGATTCCCATTATTTACTGGACTAACCTTA  
ATAAATTTTTTTTTAAAAACCCAATTTATTACTATATTTTTAGGTGTAATTTAACAT  
TTTTTCCTCAACACTTTTTAGGGCTAAGAGGAATGCCTCGGCGATATTCGGATTA  
TCCAGATGCTTTCACTACCTGAAATGCCATTTTCATCCATTGGTTCCATTATTTCTC  
TCACAAGAATTATCTTTTTTTTATTTATCTTATGAGAAAGGCTTTCTTCCCAACGT  
AAATCTTTGAGAACTTCAAATGTAACAACCTTCAATTGAATGGTGCAAGCCCTACC  
CCCTAGTG

MEX\_TLA\_3

ATTATTAGACAAGAAAGGGGGGAAAAAAGAAGCTTTTGGACCTTAGGAATAATTTA  
TGCCATAATAGCTATCGGATTATTAGGATTCGTAGTTTGAGCTCACCATATATTTA  
CAGTAGATAGATGTAGATACCCGAGCTTACTTCACTTCAGCAACTATAATTATTG  
CGGTTCCAACCTGGGATTAAGTCTTTAGATGACTAGCCACCTTTTCATGGAACCTCA  
AATTTTAAATAGACCAGTAACCCTGTGAGCTTTAGGTTTTGTATTTTTATTTACAG  
TAGGAGGATTAACAGGGGTAAATTTAGCTAATTCTTCAATTGATATTATTCTTCAC  
GATACTTACTATGTAGTAGCTCATTTTCACTATGTTCTTTCTATAGGAGCTGTATT  
TGCAATTATAGCCGGAATTGTCCAATGATTCCCATTATTTACTGGACTAACCTTA  
ATAAATTTTTTTTTAAAAACCCAATTTATTACTATATTTTTAGGTGTAATTTAACAT  
TTTTTCCTCAACACTTTTTAGGGCTAAGAGGAATGCCTCGGCGATATTCGGATTA  
TCCAGATGCTTTCACTATCTGAAATGCCATTTTCATCTATTGGTTCCATTATTTCTC  
TCACAAGAATTATCTTTTTTTTATTTATCTTATGAGAAAGGCTTTCTTCCCAACGT  
AAATCTTTGAGAACTTTAAATGTAACAACCTTCAATTGAATGGTTCAAGCCCTACC  
CCCTAGTG

MEX\_YAU\_1

ATTATTAGACAAGAAAGGGGGGAAAAAAGAAGCTTTTGGACCTTAGGAATAATTTA

TGCCATGATAGCTATCGGATTATTAGGATTTCGTAGTTTGAGCTCACCATATATTT  
ACAGTAGATAGATGTAGATACCCGAGCTTACTTCACTTCAGCAACTATAATTATT  
GCGGTTCCAACACTGGGATTAAGTCTTTAGATGGCTAGCCACCTTTCATGGA  
CAAATTTTAAATAGACCAGTAACCCTGTGAGCTTTAGGTTTTGTATTTTTATTTAC  
AGTAGGAGGATTAACAGGGGTAATTTAGCTAATTCTTCAATTGATATTATTCTTC  
ACGATACTTACTATGTAGTAGCTCATTTTCACTATGTTCTTTCTATAGGAGCTGTA  
TTTGCAATTATAGCCGGAATTAGCCAATGATTCCCATTATTTACTGGACTAACCTT  
AAATAATTTTTTTTTAAAAACCCAATTTATTACTATATTTTTAGGTGTAAATTTAACA  
TTTTTTCCTCAACACTTTTTAGGGCTAAGAGGAATGCCTCGGCGATATTCGGATT  
ATCCAGATGCTTTCCTACTATCTGAAATGCCATTTTCATCTATTGGTTCATTATTTCT  
CTCACAAGAATTATCTTTTTTTTTATTTATCTTATGAGAAAGGCTTTCTTCCCAACG  
TAAATCTTTGAGAACTTTAAATGTAACAACCTTCAATTGAATGGTTCAGCCCTACC  
CCCTAGTG

MEX\_YAU\_2

ATTATTAGACAAGAAAGGGGGGAAAAAAGAAGCTTTTGGACCTTAGGAATAATTTA  
TGCCATAATAGCTATCGGATTATTAGGATTTCGTAGTTTGAGCTCACCATATATTTA  
CAGTAGATAGATGTAGATACCCGAGCTTACTTCACTTCAGCAACTATAATTATTG  
CGGTTCCAACACTGGGATTAAGTCTTTAGATGACTAGCCACCTTTCATGGA  
AATTTTAAATAGACCAGTAACCCTGTGAGCTTTAGGTTTTGTATTTTTATTTACAG  
TAGGAGGATTAACAGGGGTAATTTAGCTAATTCTTCAATTGATATTATTCTTCAC  
GATACTTACTATGTAGTAGCTCATTTTCACTATGTTCTTTCTATAGGAGCTGTATT  
TGCAATTATAGCCGGAATTGTCCAATGATTCCCATTATTTACTGGACTAACCTTA  
AATAATTTTTTTTTAAAAACCCAATTTATTACTATATTTTTAGGTGTAAATTTAACA  
TTTTTTCCTCAACACTTTTTAGGGCTAAGAGGAATGCCTCGGCGATATTCGGATTA  
TCCAGATGCTTTCCTACTATCTGAAATGCCATTTTCATCTATTGGCTCCATTATTTCTC  
TCACAAGAATTATCTTTTTTTTTATTTATCTTATGAGAAAGGCTTTCTTCCCAACG  
AAATCTTTGAGAACTTTAAATGTAACAACCTTCAATTGAATGGTTCAGCCCTACC  
CCCTAGTG

CAM\_YAH

ATTATTAGACAAGAAAGGGGGGAAAAAAGAAGCTTTTGGACCTTAGGAATAATTTA  
TGCCATGATAGCTATCGGATTATTAGGATTTCGTAGTTTGAGCTCTCCATATATTT  
ACAGTAGATAGATGTAGATACCCGAGCTTACTTCACTTCAGCAACTATGATTATC  
GCGGTTCCAACACTGGGATTAAGTCTTTAGGTGACTAGCCACCTTTCATGGA  
CAAATTTTAAATAGACCAGTAACCCTGTGAGCTTTAGGTTTTGTATTTTTATTTAC  
AGTAGGAGGATTAACAGGGGTAATTTAGCTAATTCTTCAATTGATATTATTCTTC  
ACGATACTTACTATGTAGTAGCTCATTTTCACTATGTTCTTTCTATAGGAGCTGTA  
TTTGCAATTATAGCCGGAATTGTCCAATGATTCCCATTATTTACTGGACTAACCTT  
AAATAATTTTTTTTTAAAAACCCAATTTATTACTATATTTTTAGGTGTAAATTTAACA  
TTTTTTCCTCAACACTTTTTAGGGCTAAGAGGAATGCCTCGGCGATATTCGGATT  
ATCCAGATGCTTTCCTACTATCTGAAATGCCATTTTCATCTATTGGTTCATTATTTCT  
CTCACAAGAATTATCTTTTTTTTTATTTATCTTATGAGAAAGGCTTTCTTCCCAACG  
TAAATCTTTGAGAACTTTAAATGTAACAACCTTCAATTGAATGGTTCAGCCCTACC  
CCCTAGTG

CAM\_YAH01

ATTATTAGACAAGAAAGGGGGGAAAAAAGAAGCTTTTGGACCTTAGGAATAATTTA  
TGCCATGATAGCTATCGGATTATTAGGATTTCGTAGTTTGAGCTCTCCATATATTT  
ACAGTAGATAGATGTAGATACCCGAGCTTACTTCACTTCAGCAACTATGATTATC  
GCGGTTCCAACACTGGGATTAAGTCTTTAGGTGACTAGCCACCTTTCATGGA  
CAAATTTTAAATAGACCAGTAACCCTGTGAGCTTTAGGTTTTGTATTTTTATTTAC  
AGTAGGAGGATTAACAGGGGTAATTTAGCTAATTCTTCAATTGATATTATTCTTC

ACGATACTTACTATGTAGTAGCTCATTTTTCACTATGTTCTTTCTATAGGAGCTGTA  
TTTGCAATTATAGCCGGAATTGTCCAATGATTCCCATTATTTACTGGACTAACCTT  
AAATAATTTTTTTTTAAAAACCCAATTTATTACTATATTTTTAGGTGTAAATTTAACA  
TTTTTTCCTCAACACTTTTTAGGGCTAAGAGGAATGCCTCGGCGATATTCGGATT  
ATCCAGATGCTTTCCTACTATCTGAAATGCCATTTTCATCTATTGGTTCCATTATTTCT  
CTCACAAGAATTATCTTTTTTTTTATTTATCTTATGAGAAAGGCTTTCTTCCCAACG  
TAAATCTTTGAGAACTTTAAATGTAACAACCTTCAATTGAATGGTTCAAGCCCTACC  
CCCTAGTG

CAM\_YAH02

ATTATTAGACAAGAAAGGGGGGAAAAAGAAGCTTTTGGACCTTAGGAATAATTTA  
TGCCATGATAGCTATCGGATTATTAGGATTCGTAGTTTGAGCTCTCCATATATTT  
ACAGTAGATAGATGTAGATACCCGAGCTTACTTCACTTCAGCAACTATGATTATC  
GCGGTTCCAACACTGGGATTAAGTCTTTAGGTGACTAGCCACCTTTCATGGA  
CAAATTTTAAATAGACCAGTAACCCTGTGAGCTTTAGGTTTTGTATTTTTATTTAC  
AGTAGGAGGATTAACAGGGGTAATTTTAGCTAATTCTTCAATTGATATTATTCTTC  
ACGATACTTACTATGTAGTAGCTCATTTTTCACTATGTTCTTTCTATAGGAGCTGTA  
TTTGCAATTATAGCCGGAATTGTCCAATGATTCCCATTATTTACTGGACTAACCTT  
AAATAATTTTTTTTTAAAAACCCAATTTATTACTATATTTTTAGGTGTAAATTTAACA  
TTTTTTCCTCAACACTTTTTAGGGCTAAGAGGAATGCCTCGGCGATATTCGGATT  
ATCCAGATGCTTTCCTACTATCTGAAATGCCATTTTCATCTATTGGTTCCATTATTTCT  
CTCACAAGAATTATCTTTTTTTTTATTTATCTTATGAGAAAGGCTTTCTTCCCAACG  
TAAATCTTTGAGAACTTTAAATGTAACAACCTTCAATTGAATGGTTCAAGCCCTACC  
CCCTAGTG

China

ATTATTAGACAAGAAAGGGGGGAAAAAGAAGCTTTTGGACCTTAGGAATAATTTA  
TGCCATGATAGCTATCGGATTATTAGGATTCGTAGTTTGAGCTCACCATATATTT  
ACAGTAGATAGATGTAGATACCCGAGCTTACTTCACTTCAGCAACTATAATTATT  
GCGGTTCCAACACTGGGATTAAGTCTTTAGATGACTAGCCACCTTTCATGGA  
CAAATTTTAAATAGACCAGTAACCCTGTGAGCTTTAGGTTTTGTATTTTTATTTAC  
AGTAGGAGGATTAACAGGGGTAATTTTAGCTAATTCTTCAATTGATATTATTCTTC  
ACGATACTTACTATGTAGTAGCTCATTTTTCACTATGTTCTTTCTATAGGAGCTGTA  
TTTGCAATTATAGCCGGAATTGTCCAATGATTCCCATTATTTACCGGACTAACCT  
TAAATAATTTTTTTTTAAAAACCCAATTTATTACTATATTTTTAGGTGTAAATTTAAC  
ATTTTTTCCCAACACTTTTTAGGGCTAAGAGGAATGCCTCGGCGATATTCGGAT  
TATCCAGATGCTTTCCTACTATCTGAAATGCCATTTTCATCTATTGGTTCCATTATTTCT  
TCTCACAAGAATTATCTTTTTTTTTATTTATCTTATGAGAAAGGCTTTCTTCCCAAC  
GTAATCTTTGAGAACTTTAAATGTAACAACCTTCAATTGAATGGTTCAAGCCCTAC  
CCCCTAGTG

FRA\_CHA\_5

ATTATTAGACAAGAAAGGGGGGAAAAAGAAGCTTTTGGACCTTAGGAATAATTTA  
TGCCATGATAGCTATCGGATTATTAGGATTCGTAGTTTGAGCTCACCATATATTT  
ACAGTAGATAGATGTAGATACCCGAGCTTACTTCACTTCAGCAACTATAATTATT  
GCGGTTCCAACACTGGGATTAAGTCTTTAGATGACTAGCCACCTTTCATGGA  
CAAATTTTAAATAGACCAGTAACCCTGTGAGCTTTAGGCTTTGTATTTTTATTTAC  
AGTAGGAGGATTAACAGGGGTAATTTTAGCTAATTCTTCAATTGATATTATTCTTC  
ACGATACTTACTATGTAGTAGCTCATTTTTCACTATGTTCTTTCTATAGGAGCTGTA  
TTTGCAATTATAGCCGGAATTGTCCAATGATTTCCATTATTTACTGGACTAACCTT  
AAATAATTTTTTTTTAAAAACCCAATTTATTACTATATTTTTAGGTGTAAATTTAACA  
TTTTTTCCTCAACACTTTTTAGGGCTAAGAGGAATGCCTCGGCGATATTCGGATT  
ATCCAGATGCTTTCCTACTATCTGAAATGCCATTTTCATCTATTGGTTCCATTATTTCT

CTCACAGAATTATCTTTTTTTTATTTATCTTATGAGAAAGGCTTTCTTCCCAACG  
TAAATCTTTGAGAACTTTAAATGTAACAACCTTCAATTGAATGGTTCAAGCCCTACC  
CCCTAGTG

SPA\_PRA\_1

ATTATTAGACAAGAAAGGGGGGAAAAAAGAAGCTTTTGGACCTTAGGAATAATTTA  
TGCCATGATAGCTATCGGATTATTAGGATTCGTAGTTTGAGCTCACCATATATTT  
ACAGTAGATAGATGTAGATACCCGAGCTTACTTCACTTCAGCAACTATAATTATT  
GCGGTTCCAACCTGGGATTAAGTCTTTAGATGACTAGCCACCTTTTCATGGAACCT  
CAAATTTTAAATAGACCAGTAACCCTGTGAGCTTTAGGTTTTGTATTTTTATTTAC  
AGTAGGAGGATTAACAGGGGTAATTTAGCTAATTCTTCAATTGATATTATTCTTC  
ACGATACTTACTATGTAGTAGCTCATTTTCACTATGTTCTTTCTATAGGAGCTGTA  
TTTGCAATTATAGCCGGAATTGTCCAATGATTCCCATTATTTACCGGACTAACCT  
TAAATAATTTTTTTTTAAAAACCCAATTTATTACTATATTTTTAGGTGTAAATTTAAC  
ATTTTTTCCCAACACTTTTTAGGGCTAAGAGGAATGCCTCGGCGATATTTCGGAT  
TATCCAGATGCTTTCACTATCTGAAATGCCATTTTCATCTATTGGTTCCATTATTTCT  
TCTCACAGAATTATCTTTTTTTTATTTATCTTATGAGAAAGGCTTTCTTCCCAAC  
GTAATCTTTGAGAACTTTAAATGTAACAACCTTCAATTGAATGGTTCAAGCCCTAC  
CCCCTAGTG

SWI\_NEU\_1

ATTATTAGACAAGAAAGGGGGGAAAAAAGAAGCTTTTGGACCTTAGGAATAATTTA  
TGCCATGATAGCTATCGGATTATTAGGATTCGTAGTTTGAGCTCACCATATATTT  
ACAGTAGATAGATGTAGATACCCGAGCTTACTTCACTTCAGCAACTATGATTATC  
GCGGTTCCAACCTGGGATTAAGTCTTTAGGTGGCTAGCCACCTTTTCATGGAACCT  
CAAATTTTAAATAGACCAGTAACCCTGTGAGCTTTAGGTTTTGTATTTTTATTTAC  
AGTAGGAGGATTAACAGGGGTAATTTAGCTAATTCTTCAATTGATATTATTCTTC  
ACGATACTTACTATGTAGTAGCTCATTTTCACTATGTTCTTTCTATAGGAGCTGTA  
TTTGCAATTATAGCCGGAATTGTCCAATGATTCCCATTATTTACTGGACTAACCTT  
AAATAATTTTTTTTTAAAAACCCAATTTATTACTATATTTTTAGGTGTAAATTTAAC  
TTTTTTCCTCAACACTTTTTAGGGCTAAGAGGAATGCCTCGGCGATATTTCGGATT  
ATCCAGATGCTTTCACTATCTGAAATGCCATTTTCATCTATTGGTTCCATTATTTCT  
CTCACAGAATTATCTTTTTTTTATTTATCTTATGAGAAAGGCTTTCTTCCCAACG  
TAAATCTTTGAGAACTTTAAATGTAACAACCTTCAATTGAATGGTTCAAGCCCTACC  
CCCTAGTG

SWT\_NEU

ATTATTAGACAAGAAAGGGGGGAAAAAAGAAGCTTTTGGACCTTAGGAATAATTTA  
TGCCATGATAGCTATCGGATTATTAGGATTCGTAGTTTGAGCTCACCATATATTT  
ACAGTAGATAGATGTAGATACCCGAGCTTACTTCACTTCAGCAACTATGATTATC  
GCGGTTCCAACCTGGGATTAAGTCTTTAGGTGGCTAGCCACCTTTTCATGGAACCT  
CAAATTTTAAATAGACCAGTAACCCTGTGAGCTTTAGGTTTTGTATTTTTATTTAC  
AGTAGGAGGATTAACAGGGGTAATTTAGCTAATTCTTCAATTGATATTATTCTTC  
ACGATACTTACTATGTAGTAGCTCATTTTCACTATGTTCTTTCTATAGGAGCTGTA  
TTTGCAATTATAGCCGGAATTGTCCAATGATTCCCATTATTTACTGGACTAACCTT  
AAATAATTTTTTTTTAAAAACCCAATTTATTACTATATTTTTAGGTGTAAATTTAAC  
TTTTTTCCTCAACACTTTTTAGGGCTAAGAGGAATGCCTCGGCGATATTTCGGATT  
ATCCAGATGCTTTCACTATCTGAAATGCCATTTTCATCTATTGGTTCCATTATTTCT  
CTCACAGAATTATCTTTTTTTTATTTATCTTATGAGAAAGGCTTTCTTCCCAACG  
TAAATCTTTGAGAACTTTAAATGTAACAACCTTCAATTGAATGGTTCAAGCCCTACC  
CCCTAGTG

SWT\_NEU2

ATTATTAGACAAGAAAGGGGGGAAAAAAGAAGCTTTTGGACCTTAGGAATAATTTA

TGCCATGATAGCTATCGGATTATTAGGATTCGTAGTTTGAGCTCACCATATATTT  
ACAGTAGATAGATGTAGATACCCGAGCTTACTTCACTTCAGCAACTATGATTATC  
GCGGTTCCAACCTGGGATTAAGTCTTTAGGTGGCTAGCCACCTTTCATGGAAC  
CAAATTTTAAATAGACCAGTAACCCTGTGAGCTTTAGGTTTTGTATTTTTATTTAC  
AGTAGGAGGATTAACAGGGGTAATTTAGCTAATTCTTCAATTGATATTATTCTTC  
ACGATACTTACTATGTAGTAGCTCATTTTCACTATGTTCTTTCTATAGGAGCTGTA  
TTTGCAATTATAGCCGGAATTGTCCAATGATTCCCATTATTTACTGGACTAACCTT  
AAATAATTTTTTTTTTAAAAACCCAATTTATTACTATATTTTTTAGGTGTAAATTTAACA  
TTTTTTCCTCAACACTTTTTAGGGCTAAGAGGAATGCCTCGGCGATATTCGGATT  
ATCCAGATGCTTTCACTATCTGAAATGCCATTTTCATCTATTGGTTCCATTATTTCT  
CTCACAAGAATTATCTTTTTTTTTATTTATCTTATGAGAAAGGCTTTCTTCCCAACG  
TAAATCTTTGAGAACTTTAAATGTAACAACCTTCAATTGAATGGTTCAAGCCCTACC  
CCCTAGTG

MEX\_YOH

ATTATTAGACAAGAAAGGGGGGAAAAAAGAAGCTTTTGGACCTTAGGAATAATTTA  
TGCTATAATAGCTATCGGATTATTAGGATTCGTAGTTTGAGCTCACCATATATTTA  
CAGTAGATAGATGTAGATACCCGAGCTTACTTCACTTCAGCAACTATAATTATTG  
CGGTTCCAACCTGGGATTAAGTCTTTAGATGACTAGCCACCTTTCATGGAAC  
AATTTTAAATAGACCAGTAACCCTGTGAGCTTTAGGTTTTGTATTTTTATTTACAG  
TAGGAGGATTAACAGGGGTAATTTAGCTAATTCTTCAATTGATATTATTCTCCAC  
GATACTTACTATGTAGTAGCTCATTTTCACTATGTTCTTTCTATAGGAGCTGTATT  
TGCAATTATAGCCGGAATTGTCCAATGATTCCCATTATTTACCGGACTAACCTTA  
AATAATTTTTTTTTTAAAAACCCAATTTATTACTATATTTTTAGGTGTAAATTTAACA  
TTTTTTCCTCAACACTTTTTAGGGCTAAGAGGAATGCCTCGGCGATATTCGGATTA  
TCCAGATGCTTTCACTATCTGAAATGCCATTTTCATCTATTGGTTCCATTATTTCTC  
TCACAAGAATTATCTTTTTTTTTATTTATCTTATGAGAAAGGCTTTCTTCCCAACG  
AAATCTTTGAGAACTTTAAATGTAACAACCTTCAATTGAATGGTTCAAGCCCTACC  
CCCTAGTG

MEX\_YOH\_1

ATTATTAGACAAGAAAGGGGGGAAAAAAGAAGCTTTTGGACCTTAGGAATAATTTA  
TGCTATAATAGCTATCGGATTATTAGGATTCGTAGTTTGAGCTCACCATATATTTA  
CAGTAGATAGATGTAGATACCCGAGCTTACTTCACTTCAGCAACTATAATTATTG  
CGGTTCCAACCTGGGATTAAGTCTTTAGATGACTAGCCACCTTTCATGGAAC  
AATTTTAAATAGACCAGTAACCCTGTGAGCTTTAGGTTTTGTATTTTTATTTACAG  
TAGGAGGATTAACAGGGGTAATTTAGCTAATTCTTCAATTGATATTATTCTCCAC  
GATACTTACTATGTAGTAGCTCATTTTCACTATGTTCTTTCTATAGGAGCTGTATT  
TGCAATTATAGCCGGAATTGTCCAATGATTCCCATTATTTACCGGACTAACCTTA  
AATAATTTTTTTTTTAAAAACCCAATTTATTACTATATTTTTAGGTGTAAATTTAACA  
TTTTTTCCTCAACACTTTTTAGGGCTAAGAGGAATGCCTCGGCGATATTCGGATTA  
TCCAGATGCTTTCACTATCTGAAATGCCATTTTCATCTATTGGTTCCATTATTTCTC  
TCACAAGAATTATCTTTTTTTTTATTTATCTTATGAGAAAGGCTTTCTTCCCAACG  
AAATCTTTGAGAACTTTAAATGTAACAACCTTCAATTGAATGGTTCAAGCCCTACC  
CCCTAGTG

MEX\_YOH\_2

ATTATTAGACAAGAAAGGGGGGAAAAAAGAAGCTTTTGGACCTTAGGAATAATTTA  
TGCTATAATAGCTATCGGATTATTAGGATTCGTAGTTTGAGCTCACCATATATTTA  
CAGTAGATAGATGTAGATACCCGAGCTTACTTCACTTCAGCAACTATAATTATTG  
CGGTTCCAACCTGGGATTAAGTCTTTAGATGACTAGCCACCTTTCATGGAAC  
AATTTTAAATAGACCAGTAACCCTGTGAGCTTTAGGTTTTGTATTTTTATTTACAG  
TAGGAGGATTAACAGGGGTAATTTAGCTAATTCTTCAATTGATATTATTCTCCAC

GATACTTACTATGTAGTAGCTCATTTTTCACTATGTTCTTTCTATAGGAGCTGTATT  
TGCAATTATAGCCGGAATTGTCCAATGATTCCCATTATTTACCGGACTAACCTTA  
ATAAATTTTTTTTTAAAAACCCAATTTATTACTATATTTTTAGGTGTAATTTAACAT  
TTTTTCCTCAACACTTTTTAGGGCTAAGAGGAATGCCTCGGCGATATTCGGATTA  
TCCAGATGCTTTCACTATCTGAAATGCCATTTTCATCTATTGGTTCCATTATTTCTC  
TCACAAGAATTATCTTTTTTTTTATTTATCTTATGAGAAAGGCTTTCTTCCCAACGT  
AAATCTTTGAGAACTTTAAATGTAACAACCTTCAATTGAATGGTTCAAGCCCTACC  
CCCTAGTG

AOPE\_15

ATTATTAGACAAGAAAGGGGGAAAAAAGAAGCTTTTGGACCTTAGGAATAATTTA  
TGCTATAATAGCTATCGGATTATTAGGATTCGTAGTTTGAGCTCACCATATATTTA  
CAGTAGATAGATGTAGATACCCGAGCTTACTTCACTTCAGCAACTATAATTATTG  
CGGTTCCAACCTGGGATTAAGTCTTTAGATGACTAGCCACCTTTTCATGGAECTCA  
AATTTTAAATAGACCAGTAACCCTGTGAGCTTTAGGTTTTGTATTTTTATTTACAG  
TAGGAGGATTAACAGGGGTAATTTTAGCTAATTCTTCAATTGATATTATTCTCCAC  
GATACTTACTATGTAGTAGCTCATTTTTCACTATGTTCTTTCTATAGGAGCTGTATT  
TGCAATTATAGCCGGAATTGTCCAATGATTCCCATTATTTACCGGACTAACCTTA  
ATAAATTTTTTTTTAAAAACCCAATTTATTACTATATTTTTAGGTGTAATTTAACAT  
TTTTTCCTCAACACTTTTTAGGGCTAAGAGGAATGCCTCGGCGATATTCGGATTA  
TCCAGATGCTTTCACTATCTGAAATGCCATTTTCATCTATTGGTTCCATTATTTCTC  
TCACAAGAATTATCTTTTTTTTTATTTATCTTATGAGAAAGGCTTTCTTCCCAACGT  
AAATCTTTGAGAACTTTAAATGTAACAACCTTCAATTGAATGGTTCAAGCCCTACC  
CCCTAGTG

AOPE\_2

ATTATTAGACAAGAAAGGGGGAAAAAAGAAGCTTTTGGACCTTAGGAATAATTTA  
TGCTATAATAGCTATCGGATTATTAGGATTCGTAGTTTGAGCTCACCATATATTTA  
CAGTAGATAGATGTAGATACCCGAGCTTACTTCACTTCAGCAACTATAATTATTG  
CGGTTCCAACCTGGGATTAAGTCTTTAGATGACTAGCCACCTTTTCATGGAECTCA  
AATTTTAAATAGACCAGTAACCCTGTGAGCTTTAGGTTTTGTATTTTTATTTACAG  
TAGGAGGATTAACAGGGGTAATTTTAGCTAATTCTTCAATTGATATTATTCTCCAC  
GATACTTACTATGTAGTAGCTCATTTTTCACTATGTTCTTTCTATAGGAGCTGTATT  
TGCAATTATAGCCGGAATTGTCCAATGATTCCCATTATTTACCGGACTAACCTTA  
ATAAATTTTTTTTTAAAAACCCAATTTATTACTATATTTTTAGGTGTAATTTAACAT  
TTTTTCCTCAACACTTTTTAGGGCTAAGAGGAATGCCTCGGCGATATTCGGATTA  
TCCAGATGCTTTCACTATCTGAAATGCCATTTTCATCTATTGGTTCCATTATTTCTC  
TCACAAGAATTATCTTTTTTTTTATTTATCTTATGAGAAAGGCTTTCTTCCCAACGT  
AAATCTTTGAGAACTTTAAATGTAACAACCTTCAATTGAATGGTTCAAGCCCTACC  
CCCTAGTG

AOPE\_3

ATTATTAGACAAGAAAGGGGGAAAAAAGAAGCTTTTGGACCTTAGGAATAATTTA  
TGCTATAATAGCTATCGGATTATTAGGATTCGTAGTTTGAGCTCACCATATATTTA  
CAGTAGATAGATGTAGATACCCGAGCTTACTTCACTTCAGCAACTATAATTATTG  
CGGTTCCAACCTGGGATTAAGTCTTTAGATGACTAGCCACCTTTTCATGGAECTCA  
AATTTTAAATAGACCAGTAACCCTGTGAGCTTTAGGTTTTGTATTTTTATTTACAG  
TAGGAGGATTAACAGGGGTAATTTTAGCTAATTCTTCAATTGATATTATTCTCCAC  
GATACTTACTATGTAGTAGCTCATTTTTCACTATGTTCTTTCTATAGGAGCTGTATT  
TGCAATTATAGCCGGAATTGTCCAATGATTCCCATTATTTACCGGACTAACCTTA  
ATAAATTTTTTTTTAAAAACCCAATTTATTACTATATTTTTAGGTGTAATTTAACAT  
TTTTTCCTCAACACTTTTTAGGGCTAAGAGGAATGCCTCGGCGATATTCGGATTA  
TCCAGATGCTTTCACTATCTGAAATGCCATTTTCATCTATTGGTTCCATTATTTCTC

TCACAAGAATTATCTTTTTTTTTATTTATCTTATGAGAAAGGCTTTCTTCCCAACGT  
AAATCTTTGAGAACTTTAAATGTAACAACCTTCAATTGAATGGTTCAAGCCCTACC  
CCCTAGTG

AOPE\_12

ATTATTAGACAAGAAAGGGGGGAAAAAAGAAGCTTTTGGACCTTAGGAATAATTTA  
TGCTATAATAGCTATCGGATTATTAGGATTCGTAGTTTGAGCTCACCATATATTTA  
CAGTAGATAGATGTAGATACCCGAGCTTACTTCACTTCAGCAACTATAATTATTG  
CGGTTCCAACCTGGGATTAAGTCTTTAGATGACTAGCCACCTTTTCATGGAACCTCA  
AATTTTAAATAGACCAGTAACCCTGTGAGCTTTAGGTTTTGTATTTTTATTTACAG  
TAGGAGGATTAACAGGGGTAAATTTAGCTAATTCTTCAATTGATATTATTCTCCAC  
GATACTTACTATGTAGTAGCTCATTTTCACTATGTTCTTTCTATAGGAGCTGTATT  
TGCAATTATAGCCGGAATTGTCCAATGATTCCCATTATTTACCGGACTAACCTTA  
ATAAATTTTTTTTTAAAAACCCAATTTATTACTATATTTTTAGGTGTAATTTAACAT  
TTTTTCCTCAACACTTTTTAGGGCTAAGAGGAATGCCTCGGCGATATTCGGATTA  
TCCAGATGCTTTCACTATCTGAAATGCCATTTTCATCTATTGGTTCCATTATTTCTC  
TCACAAGAATTATCTTTTTTTTTATTTATCTTATGAGAAAGGCTTTCTTCCCAACGT  
AAATCTTTGAGAACTTTAAATGTAACAACCTTCAATTGAATGGTTCAAGCCCTACC  
CCCTAGTG

AOPE\_13

ATTATTAGACAAGAAAGGGGGGAAAAAAGAAGCTTTTGGACCTTAGGAATAATTTA  
TGCTATAATAGCTATCGGATTATTAGGATTCGTAGTTTGAGCTCACCATATATTTA  
CAGTAGATAGATGTAGATACCCGAGCTTACTTCACTTCAGCAACTATAATTATTG  
CGGTTCCAACCTGGGATTAAGTCTTTAGATGACTAGCCACCTTTTCATGGAACCTCA  
AATTTTAAATAGACCAGTAACCCTGTGAGCTTTAGGTTTTGTATTTTTATTTACAG  
TAGGAGGATTAACAGGGGTAAATTTAGCTAATTCTTCAATTGATATTATTCTCCAC  
GATACTTACTATGTAGTAGCTCATTTTCACTATGTTCTTTCTATAGGAGCTGTATT  
TGCAATTATAGCCGGAATTGTCCAATGATTCCCATTATTTACCGGACTAACCTTA  
ATAAATTTTTTTTTAAAAACCCAATTTATTACTATATTTTTAGGTGTAATTTAACAT  
TTTTTCCTCAACACTTTTTAGGGCTAAGAGGAATGCCTCGGCGATATTCGGATTA  
TCCAGATGCTTTCACTATCTGAAATGCCATTTTCATCTATTGGTTCCATTATTTCTC  
TCACAAGAATTATCTTTTTTTTTATTTATCTTATGAGAAAGGCTTTCTTCCCAACGT  
AAATCTTTGAGAACTTTAAATGTAACAACCTTCAATTGAATGGTTCAAGCCCTACC  
CCCTAGTG

AOPE\_14

ATTATTAGACAAGAAAGGGGGGAAAAAAGAAGCTTTTGGACCTTAGGAATAATTTA  
TGCTATAATAGCTATCGGATTATTAGGATTCGTAGTTTGAGCTCACCATATATTTA  
CAGTAGATAGATGTAGATACCCGAGCTTACTTCACTTCAGCAACTATAATTATTG  
CGGTTCCAACCTGGGATTAAGTCTTTAGATGACTAGCCACCTTTTCATGGAACCTCA  
AATTTTAAATAGACCAGTAACCCTGTGAGCTTTAGGTTTTGTATTTTTATTTACAG  
TAGGAGGATTAACAGGGGTAAATTTAGCTAATTCTTCAATTGATATTATTCTCCAC  
GATACTTACTATGTAGTAGCTCATTTTCACTATGTTCTTTCTATAGGAGCTGTATT  
TGCAATTATAGCCGGAATTGTCCAATGATTCCCATTATTTACCGGACTAACCTTA  
ATAAATTTTTTTTTAAAAACCCAATTTATTACTATATTTTTAGGTGTAATTTAACAT  
TTTTTCCTCAACACTTTTTAGGGCTAAGAGGAATGCCTCGGCGATATTCGGATTA  
TCCAGATGCTTTCACTATCTGAAATGCCATTTTCATCTATTGGTTCCATTATTTCTC  
TCACAAGAATTATCTTTTTTTTTATTTATCTTATGAGAAAGGCTTTCTTCCCAACGT  
AAATCTTTGAGAACTTTAAATGTAACAACCTTCAATTGAATGGTTCAAGCCCTACC  
CCCTAGTG

AOPE\_4

ATTATTAGACAAGAAAGGGGGGAAAAAAGAAGCTTTTGGACCTTAGGAATAATTTA



TGCTATAATAGCTATCGGATTATTAGGATTCGTAGTTTGAGCTCACCATATATTTA  
CAGTAGATAGATGTAGATACCCGAGCTTACTTCACTTCAGCAACTATAATTATTG  
CGGTTCCAACCTGGGATTAAGTCTTTAGATGACTAGCCACCTTTTCATGGAACCTCA  
AATTTTAAATAGACCAGTAACCCTGTGAGCTTTAGGTTTTGTATTTTTATTTACAG  
TAGGAGGATTAACAGGGGTAATTTTAGCTAATTCTTCAATTGATATTATTCTCCAC  
GATACTTACTATGTAGTAGCTCATTTTCACTATGTTCTTTCTATAGGAGCTGTATT  
TGCAATTATAGCCGGAATTGTCCAATGATTCCCATTATTTACCGGACTAACCTTA  
AATAATTTTTTTTTTAAAAACCCAATTTATTACTATATTTTTAGGTGTAAATTTAACAT  
TTTTTCCTCAACACTTTTTAGGGCTAAGAGGAATGCCTCGGCGATATTCGGATTA  
TCCAGATGCTTTCACTATCTGAAATGCCATTTTCATCTATTGGTTCCATTATTTCTC  
TCACAAGAATTATCTTTTTTTTTATTTATCTTATGAGAAAGGCTTTCTTCCCAACGT  
AAATCTTTGAGAACCTTTAAATGTAACAACCTTCAATTGAATGGTTCAAGCCCTACC  
CCCTAGTG

PE2\_1

ATTATTAGACAAGAAAGGGGGGAAAAAAGAAGCTTTTGGACCTTAGGAATAATTTA  
TGCTATAATAGCTATCGGATTATTAGGATTCGTAGTTTGAGCTCACCATATATTTA  
CAGTAGATAGATGTAGATACCCGAGCTTACTTCACTTCAGCAACTATAATTATTG  
CGGTTCCAACCTGGGATTAAGTCTTTAGATGACTAGCCACCTTTTCATGGAACCTCA  
AATTTTAAATAGACCAGTAACCCTGTGAGCTTTAGGTTTTGTATTTTTATTTACAG  
TAGGAGGATTAACAGGGGTAATTTTAGCTAATTCTTCAATTGATATTATTCTCCAC  
GATACTTACTATGTAGTAGCTCATTTTCACTATGTTCTTTCTATAGGAGCTGTATT  
TGCAATTATAGCCGGAATTGTCCAATGATTCCCATTATTTACCGGACTAACCTTA  
AATAATTTTTTTTTTAAAAACCCAATTTATTACTATATTTTTAGGTGTAAATTTAACAT  
TTTTTCCTCAACACTTTTTAGGGCTAAGAGGAATGCCTCGGCGATATTCGGATTA  
TCCAGATGCTTTCACTATCTGAAATGCCATTTTCATCTATTGGTTCCATTATTTCTC  
TCACAAGAATTATCTTTTTTTTTATTTATCTTATGAGAAAGGCTTTCTTCCCAACGT  
AAATCTTTGAGAACCTTTAAATGTAACAACCTTCAATTGAATGGTTCAAGCCCTACC  
CCCTAGTG

PE2\_2

ATTATTAGACAAGAAAGGGGGGAAAAAAGAAGCTTTTGGACCTTAGGAATAATTTA  
TGCTATAATAGCTATCGGATTATTAGGATTCGTAGTTTGAGCTCACCATATATTTA  
CAGTAGATAGATGTAGATACCCGAGCTTACTTCACTTCAGCAACTATAATTATTG  
CGGTTCCAACCTGGGATTAAGTCTTTAGATGACTAGCCACCTTTTCATGGAACCTCA  
AATTTTAAATAGACCAGTAACCCTGTGAGCTTTAGGTTTTGTATTTTTATTTACAG  
TAGGAGGATTAACAGGGGTAATTTTAGCTAATTCTTCAATTGATATTATTCTCCAC  
GATACTTACTATGTAGTAGCTCATTTTCACTATGTTCTTTCTATAGGAGCTGTATT  
TGCAATTATAGCCGGAATTGTCCAATGATTCCCATTATTTACCGGACTAACCTTA  
AATAATTTTTTTTTTAAAAACCCAATTTATTACTATATTTTTAGGTGTAAATTTAACAT  
TTTTTCCTCAACACTTTTTAGGGCTAAGAGGAATGCCTCGGCGATATTCGGATTA  
TCCAGATGCTTTCACTATCTGAAATGCCATTTTCATCTATTGGTTCCATTATTTCTC  
TCACAAGAATTATCTTTTTTTTTATTTATCTTATGAGAAAGGCTTTCTTCCCAACGT  
AAATCTTTGAGAACCTTTAAATGTAACAACCTTCAATTGAATGGTTCAAGCCCTACC  
CCCTAGTG

PE2\_3

ATTATTAGACAAGAAAGGGGGGAAAAAAGAAGCTTTTGGACCTTAGGAATAATTTA  
TGCTATAATAGCTATCGGATTATTAGGATTCGTAGTTTGAGCTCACCATATATTTA  
CAGTAGATAGATGTAGATACCCGAGCTTACTTCACTTCAGCAACTATAATTATTG  
CGGTTCCAACCTGGGATTAAGTCTTTAGATGACTAGCCACCTTTTCATGGAACCTCA  
AATTTTAAATAGACCAGTAACCCTGTGAGCTTTAGGTTTTGTATTTTTATTTACAG  
TAGGAGGATTAACAGGGGTAATTTTAGCTAATTCTTCAATTGATATTATTCTCCAC

GATACTTACTATGTAGTAGCTCATTTTTCACTATGTTCTTTCTATAGGAGCTGTATT  
TGCAATTATAGCCGGAATTGTCCAATGATTCCCATTATTTACCGGACTAACCTTA  
ATAAATTTTTTTTTAAAAACCCAATTTATTACTATATTTTTAGGTGTAAATTTAACAT  
TTTTTCCTCAACACTTTTTAGGGCTAAGAGGAATGCCTCGGCGATATTCGGATTA  
TCCAGATGCTTTCACTATCTGAAATGCCATTTTCATCTATTGGTTCCATTATTTCTC  
TCACAAGAATTATCTTTTTTTTTATTTATCTTATGAGAAAGGCTTTCTTCCCAACGT  
AAATCTTTGAGAACTTTAAATGTAACAACCTTCAATTGAATGGTTCAAGCCCTACC  
CCCTAGTG

PE2\_4

ATTATTAGACAAGAAAGGGGGAAAAAAGAAGCTTTTGGACCTTAGGAATAATTTA  
TGCTATAATAGCTATCGGATTATTAGGATTCGTAGTTTGAGCTCACCATATATTTA  
CAGTAGATAGATGTAGATACCCGAGCTTACTTCACTTCAGCAACTATAATTATTG  
CGGTTCCAACCTGGGATTAAGTCTTTAGATGACTAGCCACCTTTTCATGGAECTCA  
AATTTTAAATAGACCAGTAACCCTGTGAGCTTTAGGTTTTGTATTTTTATTTACAG  
TAGGAGGATTAACAGGGGTAAATTTAGCTAATTCTTCAATTGATATTATTCTCCAC  
GATACTTACTATGTAGTAGCTCATTTTTCACTATGTTCTTTCTATAGGAGCTGTATT  
TGCAATTATAGCCGGAATTGTCCAATGATTCCCATTATTTACCGGACTAACCTTA  
ATAAATTTTTTTTTAAAAACCCAATTTATTACTATATTTTTAGGTGTAAATTTAACAT  
TTTTTCCTCAACACTTTTTAGGGCTAAGAGGAATGCCTCGGCGATATTCGGATTA  
TCCAGATGCTTTCACTATCTGAAATGCCATTTTCATCTATTGGTTCCATTATTTCTC  
TCACAAGAATTATCTTTTTTTTTATTTATCTTATGAGAAAGGCTTTCTTCCCAACGT  
AAATCTTTGAGAACTTTAAATGTAACAACCTTCAATTGAATGGTTCAAGCCCTACC  
CCCTAGTG

PE2\_5

ATTATTAGACAAGAAAGGGGGAAAAAAGAAGCTTTTGGACCTTAGGAATAATTTA  
TGCTATAATAGCTATCGGATTATTAGGATTCGTAGTTTGAGCTCACCATATATTTA  
CAGTAGATAGATGTAGATACCCGAGCTTACTTCACTTCAGCAACTATAATTATTG  
CGGTTCCAACCTGGGATTAAGTCTTTAGATGACTAGCCACCTTTTCATGGAECTCA  
AATTTTAAATAGACCAGTAACCCTGTGAGCTTTAGGTTTTGTATTTTTATTTACAG  
TAGGAGGATTAACAGGGGTAAATTTAGCTAATTCTTCAATTGATATTATTCTCCAC  
GATACTTACTATGTAGTAGCTCATTTTTCACTATGTTCTTTCTATAGGAGCTGTATT  
TGCAATTATAGCCGGAATTGTCCAATGATTCCCATTATTTACCGGACTAACCTTA  
ATAAATTTTTTTTTAAAAACCCAATTTATTACTATATTTTTAGGTGTAAATTTAACAT  
TTTTTCCTCAACACTTTTTAGGGCTAAGAGGAATGCCTCGGCGATATTCGGATTA  
TCCAGATGCTTTCACTATCTGAAATGCCATTTTCATCTATTGGTTCCATTATTTCTC  
TCACAAGAATTATCTTTTTTTTTATTTATCTTATGAGAAAGGCTTTCTTCCCAACGT  
AAATCTTTGAGAACTTTAAATGTAACAACCTTCAATTGAATGGTTCAAGCCCTACC  
CCCTAGTG

PE2\_6

ATTATTAGACAAGAAAGGGGGAAAAAAGAAGCTTTTGGACCTTAGGAATAATTTA  
TGCTATAATAGCTATCGGATTATTAGGATTCGTAGTTTGAGCTCACCATATATTTA  
CAGTAGATAGATGTAGATACCCGAGCTTACTTCACTTCAGCAACTATAATTATTG  
CGGTTCCAACCTGGGATTAAGTCTTTAGATGACTAGCCACCTTTTCATGGAECTCA  
AATTTTAAATAGACCAGTAACCCTGTGAGCTTTAGGTTTTGTATTTTTATTTACAG  
TAGGAGGATTAACAGGGGTAAATTTAGCTAATTCTTCAATTGATATTATTCTCCAC  
GATACTTACTATGTAGTAGCTCATTTTTCACTATGTTCTTTCTATAGGAGCTGTATT  
TGCAATTATAGCCGGAATTGTCCAATGATTCCCATTATTTACCGGACTAACCTTA  
ATAAATTTTTTTTTAAAAACCCAATTTATTACTATATTTTTAGGTGTAAATTTAACAT  
TTTTTCCTCAACACTTTTTAGGGCTAAGAGGAATGCCTCGGCGATATTCGGATTA  
TCCAGATGCTTTCACTATCTGAAATGCCATTTTCATCTATTGGTTCCATTATTTCTC

TCACAAGAATTATCTTTTTTTTTATTTATCTTATGAGAAAGGCTTTCTTCCCAACGT  
AAATCTTTGAGAACTTTAAATGTAACAACCTTCAATTGAATGGTTCAAGCCCTACC  
CCCTAGTG

PE2\_7

ATTATTAGACAAGAAAGGGGGGAAAAAAGAAGCTTTTGGACCTTAGGAATAATTTA  
TGCTATAATAGCTATCGGATTATTAGGATTCGTAGTTTGAGCTCACCATATATTTA  
CAGTAGATAGATGTAGATACCCGAGCTTACTTCACTTCAGCAACTATAATTATTG  
CGGTTCCAACCTGGGATTAAGTCTTTAGATGACTAGCCACCTTTTCATGGAACCTCA  
AATTTTAAATAGACCAGTAACCCTGTGAGCTTTAGGTTTTGTATTTTTATTTACAG  
TAGGAGGATTAACAGGGGTAAATTTAGCTAATTCTTCAATTGATATTATTCTCCAC  
GATACTTACTATGTAGTAGCTCATTTTCACTATGTTCTTTCTATAGGAGCTGTATT  
TGCAATTATAGCCGGAATTGTCCAATGATTCCCATTATTTACCGGACTAACCTTA  
ATAAATTTTTTTTTAAAAACCCAATTTATTACTATATTTTTAGGTGTAATTTAACAT  
TTTTTCCTCAACACTTTTTAGGGCTAAGAGGAATGCCTCGGCGATATTCGGATTA  
TCCAGATGCTTTCACTATCTGAAATGCCATTTTCATCTATTGGTTCCATTATTTCTC  
TCACAAGAATTATCTTTTTTTTTATTTATCTTATGAGAAAGGCTTTCTTCCCAACGT  
AAATCTTTGAGAACTTTAAATGTAACAACCTTCAATTGAATGGTTCAAGCCCTACC  
CCCTAGTG

PE3\_1

ATTATTAGACAAGAAAGGGGGGAAAAAAGAAGCTTTTGGACCTTAGGAATAATTTA  
TGCTATAATAGCTATCGGATTATTAGGATTCGTAGTTTGAGCTCACCATATATTTA  
CAGTAGATAGATGTAGATACCCGAGCTTACTTCACTTCAGCAACTATAATTATTG  
CGGTTCCAACCTGGGATTAAGTCTTTAGATGACTAGCCACCTTTTCATGGAACCTCA  
AATTTTAAATAGACCAGTAACCCTGTGAGCTTTAGGTTTTGTATTTTTATTTACAG  
TAGGAGGATTAACAGGGGTAAATTTAGCTAATTCTTCAATTGATATTATTCTCCAC  
GATACTTACTATGTAGTAGCTCATTTTCACTATGTTCTTTCTATAGGAGCTGTATT  
TGCAATTATAGCCGGAATTGTCCAATGATTCCCATTATTTACCGGACTAACCTTA  
ATAAATTTTTTTTTAAAAACCCAATTTATTACTATATTTTTAGGTGTAATTTAACAT  
TTTTTCCTCAACACTTTTTAGGGCTAAGAGGAATGCCTCGGCGATATTCGGATTA  
TCCAGATGCTTTCACTATCTGAAATGCCATTTTCATCTATTGGTTCCATTATTTCTC  
TCACAAGAATTATCTTTTTTTTTATTTATCTTATGAGAAAGGCTTTCTTCCCAACGT  
AAATCTTTGAGAACTTTAAATGTAACAACCTTCAATTGAATGGTTCAAGCCCTACC  
CCCTAGTG

PE4\_1

ATTATTAGACAAGAAAGGGGGGAAAAAAGAAGCTTTTGGACCTTAGGAATAATTTA  
TGCTATAATAGCTATCGGATTATTAGGATTCGTAGTTTGAGCTCACCATATATTTA  
CAGTAGATAGATGTAGATACCCGAGCTTACTTCACTTCAGCAACTATAATTATTG  
CGGTTCCAACCTGGGATTAAGTCTTTAGATGACTAGCCACCTTTTCATGGAACCTCA  
AATTTTAAATAGACCAGTAACCCTGTGAGCTTTAGGTTTTGTATTTTTATTTACAG  
TAGGAGGATTAACAGGGGTAAATTTAGCTAATTCTTCAATTGATATTATTCTCCAC  
GATACTTACTATGTAGTAGCTCATTTTCACTATGTTCTTTCTATAGGAGCTGTATT  
TGCAATTATAGCCGGAATTGTCCAATGATTCCCATTATTTACCGGACTAACCTTA  
ATAAATTTTTTTTTAAAAACCCAATTTATTACTATATTTTTAGGTGTAATTTAACAT  
TTTTTCCTCAACACTTTTTAGGGCTAAGAGGAATGCCTCGGCGATATTCGGATTA  
TCCAGATGCTTTCACTATCTGAAATGCCATTTTCATCTATTGGTTCCATTATTTCTC  
TCACAAGAATTATCTTTTTTTTTATTTATCTTATGAGAAAGGCTTTCTTCCCAACGT  
AAATCTTTGAGAACTTTAAATGTAACAACCTTCAATTGAATGGTTCAAGCCCTACC  
CCCTAGTG

PE4\_2

ATTATTAGACAAGAAAGGGGGGAAAAAAGAAGCTTTTGGACCTTAGGAATAATTTA

TGCTATAATAGCTATCGGATTATTAGGATTCGTAGTTTGAGCTCACCATATATTTA  
CAGTAGATAGATGTAGATACCCGAGCTTACTTCACTTCAGCAACTATAATTATTG  
CGGTTCCAACCTGGGATTAAGTCTTTAGATGACTAGCCACCTTTTCATGGAACCTCA  
AATTTTAAATAGACCAGTAACCCTGTGAGCTTTAGGTTTTGTATTTTTATTTACAG  
TAGGAGGATTAACAGGGGTAATTTTAGCTAATTCTTCAATTGATATTATTCTCCAC  
GATACTTACTATGTAGTAGCTCATTTTCACTATGTTCTTTCTATAGGAGCTGTATT  
TGCAATTATAGCCGGAATTGTCCAATGATTCCCATTATTTACCGGACTAACCTTA  
AATAATTTTTTTTTTAAAAACCCAATTTATTACTATATTTTTAGGTGTAAATTTAACAT  
TTTTTCCTCAACACTTTTTAGGGCTAAGAGGAATGCCTCGGCGATATTCGGATTA  
TCCAGATGCTTTCACTATCTGAAATGCCATTTTCATCTATTGGTTCCATTATTTCTC  
TCACAAGAATTATCTTTTTTTTTATTTATCTTATGAGAAAGGCTTTCTTCCCAACGT  
AAATCTTTGAGAACCTTTAAATGTAACAACCTTCAATTGAATGGTTCAAGCCCTACC  
CCCTAGTG

PE4\_3

ATTATTAGACAAGAAAGGGGGGAAAAAAGAAGCTTTTGGACCTTAGGAATAATTTA  
TGCTATAATAGCTATCGGATTATTAGGATTCGTAGTTTGAGCTCACCATATATTTA  
CAGTAGATAGATGTAGATACCCGAGCTTACTTCACTTCAGCAACTATAATTATTG  
CGGTTCCAACCTGGGATTAAGTCTTTAGATGACTAGCCACCTTTTCATGGAACCTCA  
AATTTTAAATAGACCAGTAACCCTGTGAGCTTTAGGTTTTGTATTTTTATTTACAG  
TAGGAGGATTAACAGGGGTAATTTTAGCTAATTCTTCAATTGATATTATTCTCCAC  
GATACTTACTATGTAGTAGCTCATTTTCACTATGTTCTTTCTATAGGAGCTGTATT  
TGCAATTATAGCCGGAATTGTCCAATGATTCCCATTATTTACCGGACTAACCTTA  
AATAATTTTTTTTTTAAAAACCCAATTTATTACTATATTTTTAGGTGTAAATTTAACAT  
TTTTTCCTCAACACTTTTTAGGGCTAAGAGGAATGCCTCGGCGATATTCGGATTA  
TCCAGATGCTTTCACTATCTGAAATGCCATTTTCATCTATTGGTTCCATTATTTCTC  
TCACAAGAATTATCTTTTTTTTTATTTATCTTATGAGAAAGGCTTTCTTCCCAACGT  
AAATCTTTGAGAACCTTTAAATGTAACAACCTTCAATTGAATGGTTCAAGCCCTACC  
CCCTAGTG

PE4\_5

ATTATTAGACAAGAAAGGGGGGAAAAAAGAAGCTTTTGGACCTTAGGAATAATTTA  
TGCTATAATAGCTATCGGATTATTAGGATTCGTAGTTTGAGCTCACCATATATTTA  
CAGTAGATAGATGTAGATACCCGAGCTTACTTCACTTCAGCAACTATAATTATTG  
CGGTTCCAACCTGGGATTAAGTCTTTAGATGACTAGCCACCTTTTCATGGAACCTCA  
AATTTTAAATAGACCAGTAACCCTGTGAGCTTTAGGTTTTGTATTTTTATTTACAG  
TAGGAGGATTAACAGGGGTAATTTTAGCTAATTCTTCAATTGATATTATTCTCCAC  
GATACTTACTATGTAGTAGCTCATTTTCACTATGTTCTTTCTATAGGAGCTGTATT  
TGCAATTATAGCCGGAATTGTCCAATGATTCCCATTATTTACCGGACTAACCTTA  
AATAATTTTTTTTTTAAAAACCCAATTTATTACTATATTTTTAGGTGTAAATTTAACAT  
TTTTTCCTCAACACTTTTTAGGGCTAAGAGGAATGCCTCGGCGATATTCGGATTA  
TCCAGATGCTTTCACTATCTGAAATGCCATTTTCATCTATTGGTTCCATTATTTCTC  
TCACAAGAATTATCTTTTTTTTTATTTATCTTATGAGAAAGGCTTTCTTCCCAACGT  
AAATCTTTGAGAACCTTTAAATGTAACAACCTTCAATTGAATGGTTCAAGCCCTACC  
CCCTAGTG

PE\_12

ATTATTAGTCAAGAAAGGGGGGAAAAAAGAACCTTTTGGACCTTAGGAATAATTTA  
TGCTATAATAGCTATCGGATTATTAGGATTCGTAGTTTGAGCTCACCATATATTTA  
CAGTAGATAGATGTAGATACCCGAGCTTACTTCACTTCAGCAACTATAATTATTG  
CGGTTCCAACCTGGGATTAAGTCTTTAGATGACTAGCCACCTTTTCATGGAACCTCA  
AATTTTAAATAGACCAGTAACCCTGTGAGCTTTAGGTTTTGTATTTTTATTTACAG  
TAGGAGGATTAACAGGGGTAATTTTAGCTAATTCTTCAATTGATATTATTCTCCAC

GATACTTACTATGTAGTAGCTCATTTTTCACTATGTTCTTTCTATAGGAGCTGTATT  
TGCAATTATAGCCGGAATTGTCCAATGATTCCCATTATTTACCGGACTAACCTTA  
ATAAATTTTTTTTTAAAAACCCAATTTATTACTATATTTTTAGGTGTAAATTTAACAT  
TTTTTCCTCAACACTTTTTAGGGCTAAGAGGAATGCCTCGGCGATATTCGGATTA  
TCCAGATGCTTTCACTATCTGAAATGCCATTTTCATCTATTGGTTCCATTATTTCTC  
TCACAAGAATTATCTTTTTTTTTATTTATCTTATGAGAAAGGCTTTCTTCCCAACGT  
AAATCTTTGAGAACTTTAAATGTAACAACCTTCAATTGAATGGTTCAAGCCCTACC  
CCCTAGTG

PE\_13

ATTATTAGACAAGAAAGGGGGAAAAAAGAACCTTTTGGACCTTAGGAATAATTTA  
TGCTATAATAGCTATCGGATTATTAGGATTCGTAGTTTGAGCTCACCATATATTTA  
CAGTAGATAGATGTAGATACCCGAGCTTACTTCACTTCAGCAACTATAATTATTG  
CGGTTCCAACCTGGGATTAAGTCTTTAGATGACTAGCCACCTTTTCATGGAACTCA  
AATTTTAAATAGACCAGTAACCCTGTGAGCTTTAGGTTTTGTATTTTTATTTACAG  
TAGGAGGATTAACAGGGGTAATTTTAGCTAATTCTTCAATTGATATTATTCTCCAC  
GATACTTACTATGTAGTAGCTCATTTTTCACTATGTTCTTTCTATAGGAGCTGTATT  
TGCAATTATAGCCGGAATTGTCCAATGATTCCCATTATTTACCGGACTAACCTTA  
ATAAATTTTTTTTTAAAAACCCAATTTATTACTATATTTTTAGGTGTAAATTTAACAT  
TTTTTCCTCAACACTTTTTAGGGCTAAGAGGAATGCCTCGGCGATATTCGGATTA  
TCCAGATGCTTTCACTATCTGAAATGCCATTTTCATCTATTGGTTCCATTATTTCTC  
TCACAAGAATTATCTTTTTTTTTATTTATCTTATGAGAAAGGCTTTCTTCCCAACGT  
AAATCTTTGAGAACTTTAAATGTAACAACCTTCAATTGAATGGTTCAAGCCCTACC  
CCCTAGTG

PE\_15

ATTATTAGACAAGAAAGGGGGAAAAAAGAACCTTTTGGACCTTAGGAATAATTTA  
TGCTATAATACCTATCGGATTATTAGGATTCGTAGTTTGAGCTCACCATATATTTA  
CAGTAGATAGATGTAGATACCCGAGCTTACTTCACTTCAGCAACTATAATTATTG  
CGGTTCCAACCTGGGATTAAGTCTTTAGATGACTAGCCACCTTTTCATGGAACTCA  
AATTTTAAATAGACCAGTAACCCTGTGAGCTTTAGGTTTTGTATTTTTATTTACAG  
TAGGAGGATTAACAGGGGTAATTTTAGCTAATTCTTCAATTGATATTATTCTCCAC  
GATACTTACTATGTAGTAGCTCATTTTTCACTATGTTCTTTCTATAGGAGCTGTATT  
TGCAATTATAGCCGGAATTGTCCAATGATTCCCATTATTTACCGGACTAACCTTA  
ATAAATTTTTTTTTAAAAACCCAATTTATTACTATATTTTTAGGTGTAAATTTAACAT  
TTTTTCCTCAACACTTTTTAGGGCTAAGAGGAATGCCTCGGCGATATTCGGATTA  
TCCAGATGCTTTCACTATCTGAAATGCCATTTTCATCCATTGGTTCCATTATTTCTC  
TCACAAGAATTATCTTTTTTTTTATTTATCTTATGAGAAAGGCTTTCTTCCCAACGT  
AAATCTGTGAGAACTTTAAATGTAACAACCTTCAATTGAATGGTTCAAGCCCTACC  
CCCTAGTG

PE\_16

ATTATTAGACAAGAAAGGGGGAAAAAAGAAGCTTTTGGACCTTAGGAATAATTTA  
TGCTATAATAGCTATCGGATTATTAGGATTCGTAGTTTGAGCTCACCATATATTTA  
CAGTAGATAGATGTAGATACCCGAGCTTACTTCACTTCAGCAACTATAATTATTG  
CGGTTCCAACCTGGGATTAAGTCTTTAGATGACTAGCCACCTTTTCATGGAACTCA  
AATTTTAAATAGACCAGTCACCCTGTGAGCTTTAGGTTTTGTATTTTTATTTACAG  
TAGGAGGATTAACAGGGGTAATTTTAGCTAATTCTTCAATTGATATTATTCTCCAC  
GATACTTACTATGTAGTAGCTCATTTTTCACTATGTTCTTTCTATAGGAGCTGTATT  
TGCAATTATAGCCGGAATTGTCCAATGATTCCCATTATTTACCGGACTAACCTTA  
ATAAATTTTTTTTTAAAAACCCAATTTATTACTATATTTTTAGGTGTAAATTTAACAT  
TTTTTCCTCAACACTTTTTAGGGCTAAGAGGAATGCCTCGGCGATATTCGGATTA  
TCCAGATGCTTTCACTATCTGAAATGCCATTTTCATCTATTGGTTCCATTATTTCTC

TCACAAGAATTATCTTTTTTTTTATTTATCTTATGAGAAAGGCTTTCTTCCCAACGT  
AAATCTTTGAGAACTTTAAATGTAACAACCTTCAATTGAATGGTTCAAGCCCTACC  
CCCTAGTG

PE\_19

ATTATTAGACAAGAAAGGGGGGAAAAAAGAAGCTTTTGGACCTTAGGAATAATTTA  
TGCTATAATAGCTATCGGATTATTAGGATTCGTAGTTTGAGCTCACCATATATTTA  
CAGTAGATAGATGTAGATACCCGAGCTTACTTCACTTCAGCAACTATAATTATTG  
CGGTTCCAACCTGGGATTAAGTCTTTAGATGACTAGCCACCTTTTCATGGAACCTCA  
AATTTTAAATAGACCAGTCACCCTGTGAGCTTTAGGTTTTGTATTTTTATTTACAG  
TAGGAGGATTAACAGGGGTAAATTTAGCTAATTCTTCAATTGATATTATTCTCCAC  
GATACTTACTATGTAGTAGCTCATTTTCACTATGTTCTTTCTATAGGAGCTGTATT  
TGCAATTATAGCCGGAATTGTCCAATGATTCCCATTATTTACCGGACTAACCTTA  
ATAAATTTTTTTTTAAAAACCCAATTTATTACTATATTTTTAGGTGTAATTTAACAT  
TTTTTCCTCAACACTTTTTAGGGCTAAGAGGAATGCCTCGGCGATATTCGGATTA  
TCCAGATGCTTTCACTATCTGAAATGCCATTTTCATCCATTGGTTCCATTATTTCTC  
TCACAAGAATTATCTTTTTTTTTATTTATCTTATGAGAAAGGCTTTCTTCCCAACGT  
AAATCTTTGAGAACTTTAAATGTAACAACCTTCAATTGAATGGTTCAAGCCCTACC  
CCCTAGTG

PE\_2

ATTATTAGACAAGAAAGGGGGGAAAAAAGAAGCTTTTGGACCTTAGGAATAATTTA  
TGCTATAATAGCTATCGGATTATTAGGATTCGTAGTTTGAGCTCACCATATATTTA  
CAGTAGATAGATGTAGATACCCGAGCTTACTTCACTTCAGCAACTATAATTATTG  
CGGTTCCAACCTGGGATTAAGTCTTTAGATGACTAGCCACCTTTTCATGGAACCTCA  
AATTTTAAATAGACCAGTCACCCTGTGAGCTTTAGGTTTTGTATTTTTATTTACAG  
TAGGAGGATTAACAGGGGTAAATTTAGCTAATTCTTCAATTGATATTATTCTCCAC  
GATACTTACTATGTAGTAGCTCATTTTCACTATGTTCTTTCTATAGGAGCTGTATT  
TGCAATTATAGCCGGAATTGTCCAATGATTCCCATTATTTACCGGACTAACCTTA  
ATAAATTTTTTTTTAAAAACCCAATTTATTACTATATTTTTAGGTGTAATTTAACAT  
TTTTTCCTCAACACTTTTTAGGGCTAAGAGGAATGCCTCGGCGATATTCGGATTA  
TCCAGATGCTTTCACTATCTGAAATGCCATTTTCATCTATTGGTTCCATTATTTCTC  
TCACAAGAATTATCTTTTTTTTTATTTATCTTATGAGAAAGGCTTTCTTCCCAACGT  
AAATCTTTGAGAACTTTAAATGTAACAACCTTCAATTGAATGGTTCAAGCCCTACC  
CCCTAGTG

PE\_23

ATTATTAGACAAGAAAGGGGGGAAAAAAGAAGCTTTTGGACCTTAGGAATAATTTA  
TGCTATAATAGCTATCGGATTATTAGGATTCGTAGTTTGAGCTCACCATATATTTA  
CAGTAGATAGATGTAGATACCCGAGCTTACTTCACTTCAGCAACTATAATTATTG  
CGGTTCCAACCTGGGATTAAGTCTTTAGATGACTAGCCACCTTTTCATGGAACCTCA  
AATTTTAAATAGACCAGTAACCCTGTGAGCTTTAGGTTTTGTATTTTTATTTACAG  
TAGGAGGATTAACAGGGGTAAATTTAGCTAATTCTTCAATTGATATTATTCTCCAC  
GATACTTACTATGTAGTAGCTCATTTTCACTATGTTCTTTCTATAGGAGCTGTATT  
TGCAATTATAGCCGGAATTGTCCAATGATTCCCATTATTTACCGGACTAACCTTA  
ATAAATTTTTTTTTAAAAACCCAATTTATTACTATATTTTTAGGTGTAATTTAACAT  
TTTTTCCTCAACACTTTTTAGGGCTAAGAGGAATGCCTCGGCGATATTCGGATTA  
TCCAGATGCTTTCACTATCTGAAATGCCATTTTCATCTATTGGTTCCATTATTTCTC  
TCACAAGAATTATCTTTTTTTTTATTTATCTTATGAGAAAGGCTTTCTTCCCAACGT  
AAATCTTTGAGAACTTTAAATGTAACAACCTTCAATTGAATGGTTCAAGCCCTACC  
CCCTAGTG

PE\_29

ATTATTAGACAAGAAAGGGGGGAAAAAAGAAGCTTTTGGACCTTAGGAATAATTTA

TGCTATAATAGCTATCGGATTATTAGGATTCGTAGTTTGAGCTCACCATATATTTA  
CAGTAGATAGATGTAGATACCCGAGCTTACTTCACTTCAGCAACTATAATTATTG  
CGGTTCCAACCTGGGATTAAGTCTTTAGATGACTAGCCACCTTTTCATGGAACCTCA  
AATTTTAAATAGACCAGTCACCCTGTGAGCTTTAGGTTTTGTATTTTTATTTACAG  
TAGGAGGATTAACAGGGGTAATTTTAGCTAATTCTTCAATTGATATTATTCTCCAC  
GATACTTACTATGTAGTAGCTCATTTTCACTATGTTCTTTCTATAGGAGCTGTATT  
TGCAATTATAGCCGGAATTGTCCAATGATTCCCATTATTTACCGGACTAACCTTA  
AATAATTTTTTTTTTAAAAACCCAATTTATTACTATATTTTTAGGTGTAAATTTAACAT  
TTTTTCCTCAACACTTTTTAGGGCTAAGAGGAATGCCTCGGCGATATTCGGATTA  
TCCAGATGCTTTCACTATCTGAAATGCCATTTTCATCTATTGGTTCCATTATTTCTC  
TCACAAGAATTATCTTTTTTTTTATTTATCTTATGAGAAAGGCTTTCTTCCCAACGT  
AAATCTTTGAGAACCTTTAAATGTAACAACCTTCAATTGAATGGTTCAAGCCCTACC  
CCCTAGTG

PE\_6

ATTATTAGACAAGAAAGGGGGGAAAAAAGAAGCTTTTGGACCTTAGGAATAATTTA  
TGCTATAATAGCTATCGGATTATTAGGATTCGTAGTTTGAGCTCACCATATATTTA  
CAGTAGATAGATGTAGATACCCGAGCTTACTTCACTTCAGCAACTATAATTATTG  
CGGTTCCAACCTGGGATTAAGTCTTTAGATGACTAGCCACCTTTTCATGGAACCTCA  
AATTTTAAATAGACCAGTAACCCTGTGAGCTTTAGGTTTTGTATTTTTATTTACAG  
TAGGAGGATTAACAGGGGTAATTTTAGCTAATTCTTCAATTGATATTATTCTCCAC  
GATACTTACTATGTAGTAGCTCATTTTCACTATGTTCTTTCTATAGGAGCTGTATT  
TGCAATTATAGCCGGAATTGTCCAATGATTCCCATTATTTACCGGACTAACCTTA  
AATAATTTTTTTTTTAAAAACCCAATTTATTACTATATTTTTAGGTGTAAATTTAACAT  
TTTTTCCTCAACACTTTTTAGGGCTAAGAGGAATGCCTCGGCGATATTCGGATTA  
TCCAGATGCTTTCACTATCTGAAATGCCATTTTCATCTATTGGTTCCATTATTTCTC  
TCACAAGAATTATCTTTTTTTTTATTTATCTTATGAGAAAGGCTTTCTTCCCAACGT  
AAATCTTTGAGAACCTTTAAATGTAACAACCTTCAATTGAATGGTTCAAGCCCTACC  
CCCTAGTG

PE\_8

ATTATTAGACAAGAAAGGGGGGAAAAAAGAAGCTTTTGGACCTTAGGAATAATTTA  
TGCTATAATAGCTATCGGATTATTAGGATTCGTAGTTTGAGCTCACCATATATTTA  
CAGTAGATAGATGTAGATACCCGAGCTTACTTCACTTCAGCAACTATAATTATTG  
CGGTTCCAACCTGGGATTAAGTCTTTAGATGACTAGCCACCTTTTCATGGAACCTCA  
AATTTTAAATAGACCAGTAACCCTGTGAGCTTTAGGTTTTGTATTTTTATTTACAG  
TAGGAGGATTAACAGGGGTAATTTTAGCTAATTCTTCAATTGATATTATTCTCCAC  
GATACTTACTATGTAGTAGCTCATTTTCACTATGTTCTTTCTATAGGAGCTGTATT  
TGCAATTATAGCCGGAATTGTCCAATGATTCCCATTATTTACCGGACTAACCTTA  
AATAATTTTTTTTTTAAAAACCCAATTTATTACTATATTTTTAGGTGTAAATTTAACAT  
TTTTTCCTCAACACTTTTTAGGGCTAAGAGGAATGCCTCGGCGATATTCGGATTA  
TCCAGATGCTTTCACTATCTGAAATGCCATTTTCATCTATTGGTTCCATTATTTCTC  
TCACAAGAATTATCTTTTTTTTTATTTATCTTATGAGAAAGGCTTTCTTCCCAACGT  
AAATCTTTGAGAACCTTTAAATGTAACAACCTTCAATTGAATGGTTCAAGCCCTACC  
CCCTAGTG

CL1\_1

ATTATTAGACAAGAAAGGGGGGAAAAAAGAAGCTTTTGGACCTTAGGAATAATTTA  
TGCTATAATAGCTATCGGATTATTAGGATTCGTAGTTTGAGCTCACCATATATTTA  
CAGTAGATAGATGTAGATACCCGAGCTTACTTCACTTCAGCAACTATAATTATTG  
CGGTTCCAACCTGGGATTAAGTCTTTAGATGACTAGCCACCTTTTCATGGAACCTCA  
AATTTTAAATAGACCAGTAACCCTGTGAGCTTTAGGTTTTGTATTTTTATTTACAG  
TAGGAGGATTAACAGGGGTAATTTTAGCTAATTCTTCAATTGATATTATTCTCCAC

GATACTTACTATGTAGTAGCTCATTTTCACTATGTTCTTTCTATAGGAGCTGTATT  
TGCAATTATAGCCGGAATTGTCCAATGATTCCCATTATTTACCGGACTAACCTTA  
AATAATTTTTTTTTAAAAACCCAATTTATTACTATATTTTTAGGTGTAAATTTAACAT  
TTTTTCCTCAACACTTTTTAGGGCTAAGAGGAATGCCTCGGCGATATTCGGATTA  
TCCAGATGCTTTCACTATCTGAAATGCCATTTTCATCTATTGGTTCCATTATTTCTC  
TCACAAGAATTATCTTTTTTTTATTTATCTTATGAGAAAGGCTTTCTTCCCAACGT  
AAATCTTTGAGAACTTTAAATGTAACAACCTTCAATTGAATGGTTCAAGCCCTACC  
CCCTAGTG

CL1\_2

ATTATTAGACAAGAAAGGGGGAAAAAAGAAGCTTTTGGACCTTAGGAATAATTTA  
TGCTATAATAGCTATCGGATTATTAGGATTCGTAGTTTGAGCTCACCATATATTTA  
CAGTAGATAGATGTAGATACCCGAGCTTACTTCACTTCAGCAACTATAATTATTG  
CGGTTCCAACCTGGGATTAAGTCTTTAGATGACTAGCCACCTTTTCATGGAACTCA  
AATTTTAAATAGACCAGTAACCCTGTGAGCTTTAGGTTTTGTATTTTTATTTACAG  
TAGGAGGATTAACAGGGGTAATTTTAGCTAATTCTTCAATTGATATTATTCTCCAC  
GATACTTACTATGTAGTAGCTCATTTTCACTATGTTCTTTCTATAGGAGCTGTATT  
TGCAATTATAGCCGGAATTGTCCAATGATTCCCATTATTTACCGGACTAACCTTA  
AATAATTTTTTTTTAAAAACCCAATTTATTACCATATTTTTAGGTGTAAATTTAACA  
TTTTTCCTCAACACTTTTTAGGGCTAAGAGGAATGCCTCGGCGATATTCGGATT  
ATCCAGATGCTTTCACTATCTGAAATGCCATTTTCATCTATTGGTTCCATTATTTCT  
CTCACAAGAATTATCTTTTTTTTATTTATCTTATGAGAAAGGCTTTCTTCCCAACG  
TAAATCTTTGAGAACTTTAAATGTAACAACCTTCAATTGAATGGTTCAAGCCCTACC  
CCCTAGTG

CL1\_3

ATTATTAGACAAGAAAGGGGGAAAAAAGAAGCTTTTGGACCTTAGGAATAATTTA  
TGCTATAATAGCTATCGGATTATTAGGATTCGTAGTTTGAGCTCACCATATATTTA  
CAGTAGATAGATGTAGATACCCGAGCTTACTTCACTTCAGCAACTATAATTATTG  
CGGTTCCAACCTGGGATTAAGTCTTTAGATGACTAGCCACCTTTTCATGGAACTCA  
AATTTTAAATAGACCAGTAACCCTGTGAGCTTTAGGTTTTGTATTTTTATTTACAG  
TAGGAGGATTAACAGGGGTAATTTTAGCTAATTCTTCAATTGATATTATTCTCCAC  
GATACTTACTATGTAGTAGCTCATTTTCACTATGTTCTTTCTATAGGAGCTGTATT  
TGCAATTATAGCCGGAATTGTCCAATGATTCCCATTATTTACCGGACTAACCTTA  
AATAATTTTTTTTTAAAAACCCAATTTATTACTATATTTTTAGGTGTAAATTTAACAT  
TTTTTCCTCAACACTTTTTAGGGCTAAGAGGAATGCCTCGGCGATATTCGGATTA  
TCCAGATGCTTTCACTATCTGAAATGCCATTTTCATCTATTGGTTCCATTATTTCTC  
TCACAAGAATTATCTTTTTTTTATTTATCTTATGAGAAAGGCTTTCTTCCCAACGT  
AAATCTTTGAGAACTTTAAATGTAACAACCTTCAATTGAATGGTTCAAGCCCTACC  
CCCTAGTG

CL1\_4

ATTATTAGACAAGAAAGGGGGAAAAAAGAAGCTTTTGGACCTTAGGAATAATTTA  
TGCTATAATAGCTATCGGATTATTAGGATTCGTAGTTTGAGCTCACCATATATTTA  
CAGTAGATAGATGTAGATACCCGAGCTTACTTCACTTCAGCAACTATAATTATTG  
CGGTTCCAACCTGGGATTAAGTCTTTAGATGACTAGCCACCTTTTCATGGAACTCA  
AATTTTAAATAGACCAGTAACCCTGTGAGCTTTAGGTTTTGTATTTTTATTTACAG  
TAGGAGGATTAACAGGGGTAATTTTAGCTAATTCTTCAATTGATATTATTCTCCAC  
GATACTTACTATGTAGTAGCTCATTTTCACTATGTTCTTTCTATAGGAGCTGTATT  
TGCAATTATAGCCGGAATTGTCCAATGATTCCCATTATTTACCGGACTAACCTTA  
AATAATTTTTTTTTAAAAACCCAATTTATTACTATATTTTTAGGTGTAAATTTAACAT  
TTTTTCCTCAACACTTTTTAGGGCTAAGAGGAATGCCTCGGCGATATTCGGATTA  
TCCAGATGCTTTCACTATCTGAAATGCCATTTTCATCTATTGGTTCCATTATTTCTC



TCACAAGAATTATCTTTTTTTTTATTTATCTTATGAGAAAGGCTTTCTTCCCAACGT  
AAATCTTTGAGAACTTTAAATGTAACAACCTTCAATTGAATGGTTCAAGCCCTACC  
CCCTAGTG

CL1\_5

ATTATTAGACAAGAAAGGGGGGAAAAAAGAAGCTTTTGGACCTTAGGAATAATTTA  
TGCTATAATAGCTATCGGATTATTAGGATTCGTAGTTTGAGCTCACCATATATTTA  
CAGTAGATAGATGTAGATACCCGAGCTTACTTCACTTCAGCAACTATAATTATTG  
CGGTTCCAACCTGGGATTAAGTCTTTAGATGACTAGCCACCTTTTATGGAACTCA  
AATTTTAAATAGACCAGTAACCCTGTGAGCTTTAGGTTTTGTATTTTTATTTACAG  
TAGGAGGATTAACAGGGGTAAATTTAGCTAATTCTTCAATTGATATTATTCTCCAC  
GATACTTACTATGTAGTAGCTCATTTTCACTATGTTCTTTCTATAGGAGCTGTATT  
TGCAATTATAGCCGGAATTGTCCAATGATTCCCATTATTTACCGGACTAACCTTA  
ATAAATTTTTTTTTAAAAACCCAATTTATTACCATATTTTTAGGTGTAAATTTAACA  
TTTTTTCCTCAACACTTTTTAGGGCTAAGAGGAATGCCTCGGCGATATTCGGATT  
ATCCAGATGCTTTCACTATCTGAAATGCCATTTTATCTATTGGTTCCATTATTTCT  
CTCACAAGAATTATCTTTTTTTTTATTTATCTTATGAGAAAGGCTTTCTTCCCAACG  
TAAATCTTTGAGAACTTTAAATGTAACAACCTTCAATTGAATGGTTCAAGCCCTACC  
CCCTAGTG

CL1\_6

ATTATTAGACAAGAAAGGGGGGAAAAAAGAAGCTTTTGGACCTTAGGAATAATTTA  
TGCTATAATAGCTATCGGATTATTAGGATTCGTAGTTTGAGCTCACCATATATTTA  
CAGTAGATAGATGTAGATACCCGAGCTTACTTCACTTCAGCAACTATAATTATTG  
CGGTTCCAACCTGGGATTAAGTCTTTAGATGACTAGCCACCTTTTATGGAACTCA  
AATTTTAAATAGACCAGTAACCCTGTGAGCTTTAGGTTTTGTATTTTTATTTACAG  
TAGGAGGATTAACAGGGGTAAATTTAGCTAATTCTTCAATTGATATTATTCTCCAC  
GATACTTACTATGTAGTAGCTCATTTTCACTATGTTCTTTCTATAGGAGCTGTATT  
TGCAATTATAGCCGGAATTGTCCAATGATTCCCATTATTTACCGGACTAACCTTA  
ATAAATTTTTTTTTAAAAACCCAATTTATTACCATATTTTTAGGTGTAAATTTAACA  
TTTTTTCCTCAACACTTTTTAGGGCTAAGAGGAATGCCTCGGCGATATTCGGATT  
ATCCAGATGCTTTCACTATCTGAAATGCCATTTTATCTATTGGTTCCATTATTTCT  
CTCACAAGAATTATCTTTTTTTTTATTTATCTTATGAGAAAGGCTTTCTTCCCAACG  
TAAATCTTTGAGAACTTTAAATGTAACAACCTTCAATTGAATGGTTCAAGCCCTACC  
CCCTAGTG

CL1\_7

ATTATTAGACAAGAAAGGGGGGAAAAAAGAAGCTTTTGGACCTTAGGAATAATTTA  
TGCTATAATAGCTATCGGATTATTAGGATTCGTAGTTTGAGCTCACCATATATTTA  
CAGTAGATAGATGTAGATACCCGAGCTTACTTCACTTCAGCAACTATAATTATTG  
CGGTTCCAACCTGGGATTAAGTCTTTAGATGACTAGCCACCTTTTATGGAACTCA  
AATTTTAAATAGACCAGTAACCCTGTGAGCTTTAGGTTTTGTATTTTTATTTACAG  
TAGGAGGATTAACAGGGGTAAATTTAGCTAATTCTTCAATTGATATTATTCTCCAC  
GATACTTACTATGTAGTAGCTCATTTTCACTATGTTCTTTCTATAGGAGCTGTATT  
TGCAATTATAGCCGGAATTGTCCAATGATTCCCATTATTTACCGGACTAACCTTA  
ATAAATTTTTTTTTAAAAACCCAATTTATTACTATATTTTTAGGTGTAAATTTAACAT  
TTTTTTCCTCAACACTTTTTAGGGCTAAGAGGAATGCCTCGGCGATATTCGGATTA  
TCCAGATGCTTTCACTATCTGAAATGCCATTTTATCTATTGGTTCCATTATTTCTC  
TCACAAGAATTATCTTTTTTTTTATTTATCTTATGAGAAAGGCTTTCTTCCCAACGT  
AAATCTTTGAGAACTTTAAATGTAACAACCTTCAATTGAATGGTTCAAGCCCTACC  
CCCTAGTG

CL1\_8

ATTATTAGACAAGAAAGGGGGGAAAAAAGAAGCTTTTGGACCTTAGGAATAATTTA

TGCTATAATAGCTATCGGATTATTAGGATTCGTAGTTTGAGCTCACCATATATTTA  
CAGTAGATAGATGTAGATACCCGAGCTTACTTCACTTCAGCAACTATAATTATTG  
CGGTTCCAACCTGGGATTAAGTCTTTAGATGACTAGCCACCTTTTCATGGAACTCA  
AATTTTAAATAGACCAGTAACCCTGTGAGCTTTAGGTTTTGTATTTTTATTTACAG  
TAGGAGGATTAACAGGGGTAATTTTAGCTAATTCTTCAATTGATATTATTCTCCAC  
GATACTTACTATGTAGTAGCTCATTTTCACTATGTTCTTTCTATAGGAGCTGTATT  
TGCAATTATAGCCGGAATTGTCCAATGATTCCCATTATTTACCGGACTAACCTTA  
AATAATTTTTTTTTTAAAAACCCAATTTATTACCATATTTTTAGGTGTAAATTTAACA  
TTTTTTCCTCAACACTTTTTAGGGCTAAGAGGAATGCCTCGGCGATATTCGGATT  
ATCCAGATGCTTTCACTATCTGAAATGCCATTTTCATCTATTGGTTCCATTATTTCT  
CTCACAAGAATTATCTTTTTTTTTATTTATCTTATGAGAAAGGCTTTCTTCCCAACG  
TAAATCTTTGAGAACTTTAAATGTAACAACCTTCAATTGAATGGTTCAAGCCCTACC  
CCCTAGTG

CL1\_9

ATTATTAGACAAGAAAGGGGGGAAAAAAGAAGCTTTTGGACCTTAGGAATAATTTA  
TGCTATAATAGCTATCGGATTATTAGGATTCGTAGTTTGAGCTCACCATATATTTA  
CAGTAGATAGATGTAGATACCCGAGCTTACTTCACTTCAGCAACTATAATTATTG  
CGGTTCCAACCTGGGATTAAGTCTTTAGATGACTAGCCACCTTTTCATGGAACTCA  
AATTTTAAATAGACCAGTAACCCTGTGAGCTTTAGGTTTTGTATTTTTATTTACAG  
TAGGAGGATTAACAGGGGTAATTTTAGCTAATTCTTCAATTGATATTATTCTCCAC  
GATACTTACTATGTAGTAGCTCATTTTCACTATGTTCTTTCTATAGGAGCTGTATT  
TGCAATTATAGCCGGAATTGTCCAATGATTCCCATTATTTACCGGACTAACCTTA  
AATAATTTTTTTTTTAAAAACCCAATTTATTACTATATTTTTAGGTGTAAATTTAACA  
TTTTTTCCTCAACACTTTTTAGGGCTAAGAGGAATGCCTCGGCGATATTCGGATTA  
TCCAGATGCTTTCACTATCTGAAATGCCATTTTCATCTATTGGTTCCATTATTTCTC  
TCACAAGAATTATCTTTTTTTTTATTTATCTTATGAGAAAGGCTTTCTTCCCAACG  
AAATCTTTGAGAACTTTAAATGTAACAACCTTCAATTGAATGGTTCAAGCCCTACC  
CCCTAGTG

CL2\_3

ATTATTAGACAAGAAAGGGGGGAAAAAAGAAGCTTTTGGACCTTAGGAATAATTTA  
TGCTATAATAGCTATCGGATTATTAGGATTCGTAGTTTGAGCTCACCATATATTTA  
CAGTAGATAGATGTAGATACCCGAGCTTACTTCACTTCAGCAACTATAATTATTG  
CGGTTCCAACCTGGGATTAAGTCTTTAGATGACTAGCCACCTTTTCATGGAACTCA  
AATTTTAAATAGACCAGTAACCCTGTGAGCTTTAGGTTTTGTATTTTTATTTACAG  
TAGGAGGATTAACAGGGGTAATTTTAGCTAATTCTTCAATTGATATTATTCTCCAC  
GATACTTACTATGTAGTAGCTCATTTTCACTATGTTCTTTCTATAGGAGCTGTATT  
TGCAATTATAGCCGGAATTGTCCAATGATTCCCATTATTTACCGGACTAACCTTA  
AATAATTTTTTTTTTAAAAACCCAATTTATTACTATATTTTTAGGTGTAAATTTAACA  
TTTTTTCCTCAACACTTTTTAGGGCTAAGAGGAATGCCTCGGCGATATTCGGATTA  
TCCAGATGCTTTCACTATCTGAAATGCCATTTTCATCTATTGGTTCCATTATTTCTC  
TCACAAGAATTATCTTTTTTTTTATTTATCTTATGAGAAAGGCTTTCTTCCCAACG  
AAATCTTTGAGAACTTTAAATGTAACAACCTTCAATTGAATGGTTCAAGCCCTACC  
CCCTAGTG

CL2\_4

ATTATTAGACAAGAAAGGGGGGAAAAAAGAAGCTTTTGGACCTTAGGAATAATTTA  
TGCTATAATAGCTATCGGATTATTAGGATTCGTAGTTTGAGCTCACCATATATTTA  
CAGTAGATAGATGTAGATACCCGAGCTTACTTCACTTCAGCAACTATAATTATTG  
CGGTTCCAACCTGGGATTAAGTCTTTAGATGACTAGCCACCTTTTCATGGAACTCA  
AATTTTAAATAGACCAGTAACCCTGTGAGCTTTAGGTTTTGTATTTTTATTTACAG  
TAGGAGGATTAACAGGGGTAATTTTAGCTAATTCTTCAATTGATATTATTCTCCAC

GATACTTACTATGTAGTAGCTCATTTTCACTATGTTCTTTCTATAGGAGCTGTATT  
TGCAATTATAGCCGGAATTGTCCAATGATTCCCATTATTTACCGGACTAACCTTA  
AATAATTTTTTTTTAAAAACCCAATTTATTACTATATTTTTAGGTGTAATTTAACAT  
TTTTTCCTCAACACTTTTTAGGGCTAAGAGGAATGCCTCGGCGATATTCGGATTA  
TCCAGATGCTTTCACTATCTGAAATGCCATTTTCATCTATTGGTTCCATTATTTCTC  
TCACAAGAATTATCTTTTTTTTTATTTATCTTATGAGAAAGGCTTTCTTCCCAACGT  
AAATCTTTGAGAACTTTAAATGTAACAACCTTCAATTGAATGGTTCAAGCCCTACC  
CCCTAGTG

CL2\_5

ATTATTAGACAAGAAAGGGGGAAAAAAGAAGCTTTTGGACCTTAGGAATAATTTA  
TGCTATAATAGCTATCGGATTATTAGGATTCGTAGTTTGAGCTCACCATATATTTA  
CAGTAGATAGATGTAGATACCCGAGCTTACTTCACTTCAGCAACTATAATTATTG  
CGGTTCCAACCTGGGATTAAGTCTTTAGATGACTAGCCACCTTTTCATGGAACCTCA  
AATTTTAAATAGACCAGTAACCCTGTGAGCTTTAGGTTTTGTATTTTTATTTACAG  
TAGGAGGATTAACAGGGGTAATTTTAGCTAATTCTTCAATTGATATTATTCTCCAC  
GATACTTACTATGTAGTAGCTCATTTTCACTATGTTCTTTCTATAGGAGCTGTATT  
TGCAATTATAGCCGGAATTGTCCAATGATTCCCATTATTTACCGGACTAACCTTA  
AATAATTTTTTTTTAAAAACCCAATTTATTACTATATTTTTAGGTGTAATTTAACAT  
TTTTTCCTCAACACTTTTTAGGGCTAAGAGGAATGCCTCGGCGATATTCGGATTA  
TCCAGATGCTTTCACTATCTGAAATGCCATTTTCATCTATTGGTTCCATTATTTCTC  
TCACAAGAATTATCTTTTTTTTTATTTATCTTATGAGAAAGGCTTTCTTCCCAACGT  
AAATCTTTGAGAACTTTAAATGTAACAACCTTCAATTGAATGGTTCAAGCCCTACC  
CCCTAGTG

CL2\_6

ATTATTAGACAAGAAAGGGGGAAAAAAGAAGCTTTTGGACCTTAGGAATAATTTA  
TGCTATAATAGCTATCGGATTATTAGGATTCGTAGTTTGAGCTCACCATATATTTA  
CAGTAGATAGATGTAGATACCCGAGCTTACTTCACTTCAGCAACTATAATTATTG  
CGGTTCCAACCTGGGATTAAGTCTTTAGATGACTAGCCACCTTTTCATGGAACCTCA  
AATTTTAAATAGACCAGTAACCCTGTGAGCTTTAGGTTTTGTATTTTTATTTACAG  
TAGGAGGATTAACAGGGGTAATTTTAGCTAATTCTTCAATTGATATTATTCTCCAC  
GATACTTACTATGTAGTAGCTCATTTTCACTATGTTCTTTCTATAGGAGCTGTATT  
TGCAATTATAGCCGGAATTGTCCAATGATTCCCATTATTTACCGGACTAACCTTA  
AATAATTTTTTTTTAAAAACCCAATTTATTACTATATTTTTAGGTGTAATTTAACAT  
TTTTTCCTCAACACTTTTTAGGGCTAAGAGGAATGCCTCGGCGATATTCGGATTA  
TCCAGATGCTTTCACTATCTGAAATGCCATTTTCATCTATTGGTTCCATTATTTCTC  
TCACAAGAATTATCTTTTTTTTTATTTATCTTATGAGAAAGGCTTTCTTCCCAACGT  
AAATCTTTGAGAACTTTAAATGTAACAACCTTCAATTGAATGGTTCAAGCCCTACC  
CCCTAGTG

CL2\_7

ATTATTAGACAAGAAAGGGGGAAAAAAGAAGCTTTTGGACCTTAGGAATAATTTA  
TGCTATAATAGCTATCGGATTATTAGGATTCGTAGTTTGAGCTCACCATATATTTA  
CAGTAGATAGATGTAGATACCCGAGCTTACTTCACTTCAGCAACTATAATTATTG  
CGGTTCCAACCTGGGATTAAGTCTTTAGATGACTAGCCACCTTTTCATGGAACCTCA  
AATTTTAAATAGACCAGTAACCCTGTGAGCTTTAGGTTTTGTATTTTTATTTACAG  
TAGGAGGATTAACAGGGGTAATTTTAGCTAATTCTTCAATTGATATTATTCTCCAC  
GATACTTACTATGTAGTAGCTCATTTTCACTATGTTCTTTCTATAGGAGCTGTATT  
TGCAATTATAGCCGGAATTGTCCAATGATTCCCATTATTTACCGGACTAACCTTA  
AATAATTTTTTTTTAAAAACCCAATTTATTACTATATTTTTAGGTGTAATTTAACAT  
TTTTTCCTCAACACTTTTTAGGGCTAAGAGGAATGCCTCGGCGATATTCGGATTA  
TCCAGATGCTTTCACTATCTGAAATGCCATTTTCATCTATTGGTTCCATTATTTCTC

TCACAAGAATTATCTTTTTTTTTATTTATCTTATGAGAAAGGCTTTCTTCCCAACGT  
AAATCTTTGAGAACTTTAAATGTAACAACCTTCAATTGAATGGTTCAAGCCCTACC  
CCCTAGTG

CL2\_8

ATTATTAGACAAGAAAGGGGGGAAAAAAGAAGCTTTTGGACCTTAGGAATAATTTA  
TGCTATAATAGCTATCGGATTATTAGGATTCGTAGTTTGAGCTCACCATATATTTA  
CAGTAGATAGATGTAGATACCCGAGCTTACTTCACTTCAGCAACTATAATTATTG  
CGGTTCCAACCTGGGATTAAGTCTTTAGATGACTAGCCACCTTTTCATGGAACCTCA  
AATTTTAAATAGACCAGTAACCCTGTGAGCTTTAGGTTTTGTATTTTTATTTACAG  
TAGGAGGATTAACAGGGGTAAATTTAGCTAATTCTTCAATTGATATTATTCTCCAC  
GATACTTACTATGTAGTAGCTCATTTTCACTATGTTCTTTCTATAGGAGCTGTATT  
TGCAATTATAGCCGGAATTGTCCAATGATTCCCATTATTTACCGGACTAACCTTA  
ATAAATTTTTTTTTAAAAACCCAATTTATTACTATATTTTTAGGTGTAATTTAACAT  
TTTTTCCTCAACACTTTTTAGGGCTAAGAGGAATGCCTCGGCGATATTCGGATTA  
TCCAGATGCTTTCACTATCTGAAATGCCATTTTCATCTATTGGTTCCATTATTTCTC  
TCACAAGAATTATCTTTTTTTTTATTTATCTTATGAGAAAGGCTTTCTTCCCAACGT  
AAATCTTTGAGAACTTTAAATGTAACAACCTTCAATTGAATGGTTCAAGCCCTACC  
CCCTAGTG

CL2\_1

ATTATTAGACAAGAAAGGGGGGAAAAAAGAAGCTTTTGGACCTTAGGAATAATTTA  
TGCTATAATAGCTATCGGATTATTAGGATTCGTAGTTTGAGCTCACCATATATTTA  
CAGTAGATAGATGTAGATACCCGAGCTTACTTCACTTCAGCAACTATAATTATTG  
CGGTTCCAACCTGGGATTAAGTCTTTAGATGACTAGCCACCTTTTCATGGAACCTCA  
AATTTTAAATAGACCAGTAACCCTGTGAGCTTTAGGTTTTGTATTTTTATTTACAG  
TAGGAGGATTAACAGGGGTAAATTTAGCTAATTCTTCAATTGATATTATTCTCCAC  
GATACTTACTATGTAGTAGCTCATTTTCACTATGTTCTTTCTATAGGAGCTGTATT  
TGCAATTATAGCCGGAATTGTCCAATGATTCCCATTATTTACCGGACTAACCTTA  
ATAAATTTTTTTTTAAAAACCCAATTTATTACTATATTTTTAGGTGTAATTTAACAT  
TTTTTCCTCAACACTTTTTAGGGCTAAGAGGAATGCCTCGGCGATATTCGGATTA  
TCCAGATGCTTTCACTATCTGAAATGCCATTTTCATCTATTGGTTCCATTATTTCTC  
TCACAAGAATTATCTTTTTTTTTATTTATCTTATGAGAAAGGCTTTCTTCCCAACGT  
AAATCTTTGAGAACTTTAAATGTAACAACCTTCAATTGAATGGTTCAAGCCCTACC  
CCCTAGTG

CL2\_2

ATTATTAGACAAGAAAGGGGGGAAAAAAGAAGCTTTTGGACCTTAGGAATAATTTA  
TGCTATAATAGCTATCGGATTATTAGGATTCGTAGTTTGAGCTCACCATATATTTA  
CAGTAGATAGATGTAGATACCCGAGCTTACTTCACTTCAGCAACTATAATTATTG  
CGGTTCCAACCTGGGATTAAGTCTTTAGATGACTAGCCACCTTTTCATGGAACCTCA  
AATTTTAAATAGACCAGTAACCCTGTGAGCTTTAGGTTTTGTATTTTTATTTACAG  
TAGGAGGATTAACAGGGGTAAATTTAGCTAATTCTTCAATTGATATTATTCTCCAC  
GATACTTACTATGTAGTAGCTCATTTTCACTATGTTCTTTCTATAGGAGCTGTATT  
TGCAATTATAGCCGGAATTGTCCAATGATTCCCATTATTTACCGGACTAACCTTA  
ATAAATTTTTTTTTAAAAACCCAATTTATTACTATATTTTTAGGTGTAATTTAACAT  
TTTTTCCTCAACACTTTTTAGGGCTAAGAGGAATGCCTCGGCGATATTCGGATTA  
TCCAGATGCTTTCACTATCTGAAATGCCATTTTCATCTATTGGTTCCATTATTTCTC  
TCACAAGAATTATCTTTTTTTTTATTTATCTTATGAGAAAGGCTTTCTTCCCAACGT  
AAATCTTTGAGAACTTTAAATGTAACAACCTTCAATTGAATGGTTCAAGCCCTACC  
CCCTAGTG

EQ1\_3

ATTATTAGACAAGAAAGGGGGGAAAAAAGAAGCTTTTGGACCTTAGGAATAATTTA

TGCTATAATAGCTATCGGATTATTAGGATTCGTAGTTTGAGCTCACCATATATTTA  
CAGTAGATAGATGTAGATACCCGAGCTTACTTCACTTCAGCAACTATAATTATTG  
CGGTTCCAACCTGGGATTAAGTCTTTAGATGACTAGCCACCTTTTCATGGAACCTCA  
AATTTTAAATAGACCAGTAACCCTGTGAGCTTTAGGTTTTGTATTTTTATTTACAG  
TAGGAGGATTAACAGGGGTAATTTTAGCTAATTCTTCAATTGATATTATTCTCCAC  
GATACTTACTATGTAGTAGCTCATTTTCACTATGTTCTTTCTATAGGAGCTGTATT  
TGCAATTATAGCCGGAATTGTCCAATGATTCCCATTATTTACCGGACTAACCTTA  
AATAATTTTTTTTTTAAAAACCCAATTTATTACTATATTTTTAGGTGTAAATTTAACAT  
TTTTTCCTCAACACTTTTTAGGGCTAAGAGGAATGCCTCGGCGATATTCGGATTA  
TCCAGATGCTTTCACTATCTGAAATGCCATTTTCATCTATTGGTTCCATTATTTCTC  
TCACAAGAATTATCTTTTTTTTTATTTATCTTATGAGAAAGGCTTTCTTCCCAACGT  
AAATCTTTGAGAACCTTTAAATGTAACAACCTTCAATTGAATGGTTCAAGCCCTACC  
CCCTAGTG

EQ1\_6

ATTATTAGACAAGAAAGGGGGGAAAAAAGAAGCTTTTGGACCTTAGGAATAATTTA  
TGCTATAATAGCTATCGGATTATTAGGATTCGTAGTTTGAGCTCACCATATATTTA  
CAGTAGATAGATGTAGATACCCGAGCTTACTTCACTTCAGCAACTATAATTATTG  
CGGTTCCAACCTGGGATTAAGTCTTTAGATGACTAGCCACCTTTTCATGGAACCTCA  
AATTTTAAATAGACCAGTAACCCTGTGAGCTTTAGGTTTTGTATTTTTATTTACAG  
TAGGAGGATTAACAGGGGTAATTTTAGCTAATTCTTCAATTGATATTATTCTCCAC  
GATACTTACTATGTAGTAGCTCATTTTCACTATGTTCTTTCTATAGGAGCTGTATT  
TGCAATTATAGCCGGAATTGTCCAATGATTCCCATTATTTACCGGACTAACCTTA  
AATAATTTTTTTTTTAAAAACCCAATTTATTACTATATTTTTAGGTGTAAATTTAACAT  
TTTTTCCTCAACACTTTTTAGGGCTAAGAGGAATGCCTCGGCGATATTCGGATTA  
TCCAGATGCTTTCACTATCTGAAATGCCATTTTCATCTATTGGTTCCATTATTTCTC  
TCACAAGAATTATCTTTTTTTTTATTTATCTTATGAGAAAGGCTTTCTTCCCAACGT  
AAATCTTTGAGAACCTTTAAATGTAACAACCTTCAATTGAATGGTTCAAGCCCTACC  
CCCTAGTG

EQ1\_7

ATTATTAGACAAGAAAGGGGGGAAAAAAGAAGCTTTTGGACCTTAGGAATAATTTA  
TGCTATAATAGCTATCGGATTATTAGGATTCGTAGTTTGAGCTCACCATATATTTA  
CAGTAGATAGATGTAGATACCCGAGCTTACTTCACTTCAGCAACTATAATTATTG  
CGGTTCCAACCTGGGATTAAGTCTTTAGATGACTAGCCACCTTTTCATGGAACCTCA  
AATTTTAAATAGACCAGTAACCCTGTGAGCTTTAGGTTTTGTATTTTTATTTACAG  
TAGGAGGATTAACAGGGGTAATTTTAGCTAATTCTTCAATTGATATTATTCTCCAC  
GATACTTACTATGTAGTAGCTCATTTTCACTATGTTCTTTCTATAGGAGCTGTATT  
TGCAATTATAGCCGGAATTGTCCAATGATTCCCATTATTTACCGGACTAACCTTA  
AATAATTTTTTTTTTAAAAACCCAATTTATTACTATATTTTTAGGTGTAAATTTAACAT  
TTTTTCCTCAACACTTTTTAGGGCTAAGAGGAATGCCTCGGCGATATTCGGATTA  
TCCAGATGCTTTCACTATCTGAAATGCCATTTTCATCTATTGGTTCCATTATTTCTC  
TCACAAGAATTATCTTTTTTTTTATTTATCTTATGAGAAAGGCTTTCTTCCCAACGT  
AAATCTTTGAGAACCTTTAAATGTAACAACCTTCAATTGAATGGTTCAAGCCCTACC  
CCCTAGTG

EQ1\_8

ATTATTAGACAAGAAAGGGGGGAAAAAAGAAGCTTTTGGACCTTAGGAATAATTTA  
TGCTATAATAGCTATCGGATTATTAGGATTCGTAGTTTGAGCTCACCATATATTTA  
CAGTAGATAGATGTAGATACCCGAGCTTACTTCACTTCAGCAACTATAATTATTG  
CGGTTCCAACCTGGGATTAAGTCTTTAGATGACTAGCCACCTTTTCATGGAACCTCA  
AATTTTAAATAGACCAGTAACCCTGTGAGCTTTAGGTTTTGTATTTTTATTTACAG  
TAGGAGGATTAACAGGGGTAATTTTAGCTAATTCTTCAATTGATATTATTCTCCAC

GATACTTACTATGTAGTAGCTCATTTTCACTATGTTCTTTCTATAGGAGCTGTATT  
TGCAATTATAGCCGGAATTGTCCAATGATTCCCATTATTTACCGGACTAACCTTA  
AATAATTTTTTTTTAAAAACCCAATTTATTACTATATTTTTAGGTGTAAATTTAACAT  
TTTTTCCTCAACACTTTTTAGGGCTAAGAGGAATGCCTCGGCGATATTCGGATTA  
TCCAGATGCTTTCACTATCTGAAATGCCATTTTCATCTATTGGTTCCATTATTTCTC  
TCACAAGAATTATCTTTTTTTTTATTTATCTTATGAGAAAGGCTTTCTTCCCAACGT  
AAATCTTTGAGAACTTTAAATGTAACAACCTTCAATTGAATGGTTCAAGCCCTACC  
CCCTAGTG

EQU\_5

ATTATTAGACAAGAAAGGGGGAAAAAGAAGCTTTTGGACCTTAGGAATAATTTA  
TGCTATAATAGCTATCGGATTATTAGGATTCGTAGTTTGAGCTCACCATATATTTA  
CAGTAGATAGATGTAGATACCCGAGCTTACTTCACTTCAGCAACTATAATTATTG  
CGGTTCCAACCTGGGATTAAGTCTTTAGATGACTAGCCACCTTTTCATGGAACCTCA  
AATTTAAATAGACCAGTAACCCTGTGAGCTTTAGGTTTTGTATTTTTATTTACAG  
TAGGAGGATTAACAGGGGTAAATTTAGCTAATTCTTCAATTGATATTATTCTCCAC  
GATACTTACTATGTAGTAGCTCATTTTCACTATGTTCTTTCTATAGGAGCTGTATT  
TGCAATTATAGCCGGAATTGTCCAATGATTCCCATTATTTACCGGACTAACCTTA  
AATAATTTTTTTTTAAAAACCCAATTTATTACTATATTTTTAGGTGTAAATTTAACAT  
TTTTTCCTCAACACTTTTTAGGGCTAAGAGGAATGCCTCGGCGATATTCGGATTA  
TCCAGATGCTTTCACTATCTGAAATGCCATTTTCATCTATTGGTTCCATTATTTCTC  
TCACAAGAATTATCTTTTTTTTTATTTATCTTATGAGAAAGGCTTTCTTCCCAACGT  
AAATCTTTGAGAACTTTAAATGTAACAACCTTCAATTGAATGGTTCAAGCCCTACC  
CCCTAGTG

;

endblock;

**datasetS6**

#NEXUS

begin data;  
dimensions ntax=187 nchar=732;  
format datatype=dna gap=- interleave=no;  
matrix

AFR10

ATTATTAGACAAGAAAGGGGGGAAAAAAGAAGCTTTTGGACCTTAGGAATAATTTA  
TGCCATGATAGCTATCGGATTATTAGGATTCGTAGTTTGAGCTCACCATATATTT  
ACAGTAGATAGATGTAGATACCCGAGCTTACTTCACTTCAGCAACTATAATTATT  
GCGGTTCCAACCTGGGATTAAGTCTTTAGATGACTAGCCACCTTTCATGGAACCT  
CAAATTTTAAATAGACCAGTAACCCTGTGAGCTTTAGGTTTTGTATTTTTATTTAC  
AGTAGGAGGATTAACAGGGGTAATTTTAGCTAATTCTTCAATTGATATTATTCTTC  
ACGATACTTACTATGTAGTAGCTCATTTTCACTATGTTCTTTCTATAGGAGCTGTA  
TTTGCAATTATAGCCGGAATTGTCCAATGATTCCCATTATTTACCGGACTAACCT  
TAAATAATTTTTTTTTTAAAAACCCAATTTATTACTATATTTTTAGGTGTAAATTTAAC  
ATTTTTTCCCAACACTTTTTAGGGCTAAGAGGAATGCCTCGGCGATATTCCGGAT  
TATCCAGATGCTTTCCTATCTGAAATGCCATTTTCATCTATTGGTTCCATTATTTTC  
TCTCACAAGAATTATCTTTTTTTTTATTTATCTTATGAGAAAGGCTTTTCTTCCCAAC  
GTAATCTTTGAGAACTTTAAATGTAACAACCTTCAATTGAATGGTTCAAGCCCTAC  
CCCCTAGTG

AFR11

ATTATTAGACAAGAAAGGGGGGAAAAAAGAAGCTTTTGGACCTTAGGAATAATTTA  
TGCCATGATAGCTATCGGATTATTAGGATTCGTAGTTTGAGCTCACCATATATTT  
ACAGTAGATAGATGTAGATACCCGAGCTTACTTCACTTCAGCAACTATAATTATT  
GCGGTTCCAACCTGGGATTAAGTCTTTAGATGACTAGCCACCTTTCATGGAACCT  
CAAATTTTAAATAGACCAGTAACCCTGTGAGCTTTAGGTTTTGTATTTTTATTTAC  
AGTAGGAGGATTAACAGGGGTAATTTTAGCTAATTCTTCAATTGATATTATTCTTC  
ACGATACTTACTATGTAGTAGCTCATTTTCACTATGTTCTTTCTATAGGAGCTGTA  
TTTGCAATTATAGCCGGAATTGTCCAATGATTCCCATTATTTACCGGACTAACCT  
TAAATAATTTTTTTTTTAAAAACCCAATTTATTACTATATTTTTAGGTGTAAATTTAAC  
ATTTTTTCCCAACACTTTTTAGGGCTAAGAGGAATGCCTCGGCGATATTCCGGAT  
TATCCAGATGCTTTCCTATCTGAAATGCCATTTTCATCTATTGGTTCCATTATTTTC  
TCTCACAAGAATTATCTTTTTTTTTATTTATCTTATGAGAAAGGCTTTTCTTCCCAAC  
GTAATCTTTGAGAACTTTAAATGTAACAACCTTCAATTGAATGGTTCAAGCCCTAC  
CCCCTAGTG

AFR12

ATTATTAGACAAGAAAGGGGGGAAAAAAGAAGCTTTTGGACCTTAGGAATAATTTA  
TGCCATGATAGCTATCGGATTATTAGGATTCGTAGTTTGAGCTCACCATATATTT  
ACAGTAGATAGATGTAGATACCCGAGCTTACTTCACTTCAGCAACTATAATTATT  
GCGGTTCCAACCTGGGATTAAGTCTTTAGATGACTAGCCACCTTTCATGGAACCT  
CAAATTTTAAATAGACCAGTAACCCTGTGAGCTTTAGGTTTTGTATTTTTATTTAC  
AGTAGGAGGATTAACAGGGGTAATTTTAGCTAATTCTTCAATTGATATTATTCTTC  
ACGATACTTACTATGTAGTAGCTCATTTTCACTATGTTCTTTCTATAGGAGCTGTA  
TTTGCAATTATAGCCGGAATTGTCCAATGATTCCCATTATTTACCGGACTAACCT  
TAAATAATTTTTTTTTTAAAAACCCAATTTATTACTATATTTTTAGGTGTAAATTTAAC  
ATTTTTTCCCAACACTTTTTAGGGCTAAGAGGAATGCCTCGGCGATATTCCGGAT  
TATCCAGATGCTTTCCTATCTGAAATGCCATTTTCATCTATTGGTTCCATTATTTTC

TCTCACAAGAATTATCTTTTTTTTTATTTATCTTATGAGAAAGGCTTTCTTCCCAAC  
GTAATCTTTGAGAACTTTAAATGTAACAACCTTCAATTGAATGGTTCAAGCCCTAC  
CCCCTAGTG

AFR18

ATTATTAGACAAGAAAGGGGGGAAAAAAGAAGCTTTTGGACCTTAGGAATAATTTA  
TGCCATGATAGCTATCGGATTATTAGGATTCGTAGTTTGAGCTCACCATATATTT  
ACAGTAGATAGATGTAGATACCCGAGCTTACTTCACTTCAGCAACTATAATTATT  
GCGGTTCCAACCTGGGATTAAGTCTTTAGATGACTAGCCACCTTTTCATGGAAC  
CAAATTTTAAATAGACCAGTAACCCTGTGAGCTTTAGGTTTTGTATTTTTATTTAC  
AGTAGGAGGATTAACAGGGGTAATTTAGCTAATTCTTCAATTGATATTATTCTTC  
ACGATACTTACTATGTAGTAGCTCATTTTCACTATGTTCTTTCTATAGGAGCTGTA  
TTTGCAATTATAGCCGGAATTGTCCAATGATTCCCATTATTTACCGGACTAACCT  
TAAATAATTTTTTTTTTAAAAACCCAATTTATTACTATATTTTTAGGTGTAAATTTAAC  
ATTTTTTCCCAACACTTTTTAGGGCTAAGAGGAATGCCTCGGCGATATTTCGGAT  
TATCCAGATGCTTTCACTATCTGAAATGCCATTTTCATCTATTGGTTCCATTATTTTC  
TCTCACAAGAATTATCTTTTTTTTTATTTATCTTATGAGAAAGGCTTTCTTCCCAAC  
GTAATCTTTGAGAACTTTAAATGTAACAACCTTCAATTGAATGGTTCAAGCCCTAC  
CCCCTAGTG

afr19

ATTATTAGACAAGAAAGGGGGGAAAAAAGAAGCTTTTGGACCTTAGGAATAATTTA  
TGCCATGATAGCTATCGGATTATTAGGATTCGTAGTTTGAGCTCACCATATATTT  
ACAGTAGATAGATGTAGATACCCGAGCTTACTTCACTTCAGCAACTATAATTATT  
GCGGTTCCAACCTGGGATTAAGTCTTTAGATGACTAGCCACCTTTTCATGGAAC  
CAAATTTTAAATAGACCAGTAACCCTGTGAGCTTTAGGTTTTGTATTTTTATTTAC  
AGTAGGAGGATTAACAGGGGTAATTTAGCTAATTCTTCAATTGATATTATTCTTC  
ACGATACTTACTATGTAGTAGCTCATTTTCACTATGTTCTTTCTATAGGAGCTGTA  
TTTGCAATTATAGCCGGAATTGTCCAATGATTCCCATTATTTACCGGACTAACCT  
TAAATAATTTTTTTTTTAAAAACCCAATTTATTACTATATTTTTAGGTGTAAATTTAAC  
ATTTTTTCCCAACACTTTTTAGGGCTAAGAGGAATGCCTCGGCGATATTTCGGAT  
TATCCAGATGCTTTCACTATCTGAAATGCCATTTTCATCTATTGGTTCCATTATTTTC  
TCTCACAAGAATTATCTTTTTTTTTATTTATCTTATGAGAAAGGCTTTCTTCCCAAC  
GTAATCTTTGAGAACTTTAAATGTAACAACCTTCAATTGAATGGTTCAAGCCCTAC  
CCCCTAGTG

AFR2

ATTATTAGACAAGAAAGGGGGGAAAAAAGAAGCTTTTGGACCTTAGGAATAATTTA  
TGCCATGATAGCTATCGGATTATTAGGATTCGTAGTTTGAGCTCACCATATATTT  
ACAGTAGATAGATGTAGATACCCGAGCTTACTTCACTTCAGCAACTATAATTATT  
GCGGTTCCAACCTGGGATTAAGTCTTTAGATGACTAGCCACCTTTTCATGGAAC  
CAAATTTTAAATAGACCAGTAACCCTGTGAGCTTTAGGTTTTGTATTTTTATTTAC  
AGTAGGAGGATTAACAGGGGTAATTTAGCTAATTCTTCAATTGATATTATTCTTC  
ACGATACTTACTATGTAGTAGCTCATTTTCACTATGTTCTTTCTATAGGAGCTGTA  
TTTGCAATTATAGCCGGAATTGTCCAATGATTCCCATTATTTACCGGACTAACCT  
TAAATAATTTTTTTTTTAAAAACCCAATTTATTACTATATTTTTAGGTGTAAATTTAAC  
ATTTTTTCCCAACACTTTTTAGGGCTAAGAGGAATGCCTCGGCGATATTTCGGAT  
TATCCAGATGCTTTCACTATCTGAAATGCCATTTTCATCTATTGGTTCCATTATTTTC  
TCTCACAAGAATTATCTTTTTTTTTATTTATCTTATGAGAAAGGCTTTCTTCCCAAC  
GTAATCTTTGAGAACTTTAAATGTAACAACCTTCAATTGAATGGTTCAAGCCCTAC  
CCCCTAGTG

AFR3

ATTATTAGACAAGAAAGGGGGGAAAAAAGAAGCTTTTGGACCTTAGGAATAATTTA



TGCCATGATAGCTATCGGATTATTAGGATTCGTAGTTTGAGCTCACCATATATTT  
ACAGTAGATAGATGTAGATACCCGAGCTTACTTCACTTCAGCAACTATAATTATT  
GCGGTTCCAACACTGGGATTAAGTCTTTAGATGACTAGCCACCTTTCATGGAAC  
CAAATTTTAAATAGACCAGTAACCCTGTGAGCTTTAGGTTTTGTATTTTTATTTAC  
AGTAGGAGGATTAACAGGGGTAATTTAGCTAATTCTTCAATTGATATTATTCTTC  
ACGATACTTACTATGTAGTAGCTCATTTTCACTATGTTCTTTCTATAGGAGCTGTA  
TTTGCAATTATAGCCGGAATTGTCCAATGATTCCCATTTTACCGGACTAACCT  
TAAATAATTTTTTTTTTAAAAACCCAATTTATTACTATATTTTTAGGTGTAAATTTAAC  
ATTTTTTCCCAACACTTTTTAGGGCTAAGAGGAATGCCTCGGCGATATTTCGGAT  
TATCCAGATGCTTTCCTATCTGAAATGCCATTTTCACTATTGGTTCCATTATTTCT  
TCTCACAAGAATTATCTTTTTTTTTATTTATCTTATGAGAAAGGCTTTCTTCCCAAC  
GTAATCTTTGAGAACTTTAAATGTAACAACCTTCAATTGAATGGTTCAAGCCCTAC  
CCCCTAGTG

AFR5

ATTATTAGACAAGAAAGGGGGGAAAAAAGAAGCTTTTGGACCTTAGGAATAATTTA  
TGCCATGATAGCTATCGGATTATTAGGATTCGTAGTTTGAGCTCACCATATATTT  
ACAGTAGATAGATGTAGATACCCGAGCTTACTTCACTTCAGCAACTATAATTATT  
GCGGTTCCAACACTGGGATTAAGTCTTTAGATGACTAGCCACCTTTCATGGAAC  
CAAATTTTAAATAGACCAGTAACCCTGTGAGCTTTAGGTTTTGTATTTTTATTTAC  
AGTAGGAGGATTAACAGGGGTAATTTAGCTAATTCTTCAATTGATATTATTCTTC  
ACGATACTTACTATGTAGTAGCTCATTTTCACTATGTTCTTTCTATAGGAGCTGTA  
TTTGCAATTATAGCCGGAATTGTCCAATGATTCCCATTTTACCGGACTAACCT  
TAAATAATTTTTTTTTTAAAAACCCAATTTATTACTATATTTTTAGGTGTAAATTTAAC  
ATTTTTTCCCAACACTTTTTAGGGCTAAGAGGAATGCCTCGGCGATATTTCGGAT  
TATCCAGATGCTTTCCTATCTGAAATGCCATTTTCACTATTGGTTCCATTATTTCT  
TCTCACAAGAATTATCTTTTTTTTTATTTATCTTATGAGAAAGGCTTTCTTCCCAAC  
GTAATCTTTGAGAACTTTAAATGTAACAACCTTCAATTGAATGGTTCAAGCCCTAC  
CCCCTAGTG

afr9

ATTATTAGACAAGAAAGGGGGGAAAAAAGAAGCTTTTGGACCTTAGGAATAATTTA  
TGCCATGATAGCTATCGGATTATTAGGATTCGTAGTTTGAGCTCACCATATATTT  
ACAGTAGATAGATGTAGATACCCGAGCTTACTTCACTTCAGCAACTATAATTATC  
GCGGTTCCAACACTGGGATTAAGTCTTTAGGTGACTAGCCACCTTTCATGGAAC  
CAAATTTTAAATAGACCAGTAACCCTGTGAGCTTTAGGTTTTGTATTTTTATTTAC  
AGTAGGAGGATTAACAGGGGTAATTTAGCTAATTCTTCAATTGATATTATTCTTC  
ACGATACTTACTATGTAGTAGCTCATTTTCACTATGTTCTTTCTATAGGAGCTGTA  
TTTGCAATTATAGCCGGAATTGTCCAATGATTCCCATTTTACTGGACTAACCTT  
AAATAATTTTTTTTTTAAAAACCCAATTTATTACTATATTTTTAGGTGTAAATTTAACA  
TTTTTCTCAACACTTTTTAGGGCTAAGAGGAATGCCTCGGCGATATTTCGGATT  
ATCCAGATGCTTTCCTATCTGAAATGCCATTTTCACTATTGGTTCCATTATTTCT  
CTCACAAGAATTATCTTTTTTTTTATTTATCTTATGAGAAAGGCTTTCTTCCCAACG  
TAAATCTTTGAGAACTTTAAATGTAACAACCTTCAATTGAATGGTTCAAGCCCTACC  
CCCTAGTG

AQU10

ATTATTAGACAAGAAAGGGGGGAAAAAAGAAGCTTTTGGACCTTAGGAATAATTTA  
TGCCATGATAGCTATCGGATTATTAGGATTCGTAGTTTGAGCTCACCATATATTT  
ACAGTAGATAGATGTAGATACCCGAGCTTACTTCACTTCAGCAACTATAATTATT  
GCGGTTCCAACACTGGGATTAAGTCTTTAGATGACTAGCCACCTTTCATGGAAC  
CAAATTTTAAATAGACCAGTAACCCTGTGAGCTTTAGGTTTTGTATTTTTATTTAC  
AGTAGGAGGATTAACAGGGGTAATTTAGCTAATTCTTCAATTGATATTATTCTTC

ACGATACTTACTATGTAGTAGCTCATTTTTCACTATGTTCTTTCTATAGGAGCTGTA  
TTTGCAATTATAGCCGGAATTGTCCAATGATTCCCATTATTTACCGGACTAACCT  
TAAATAATTTTTTTTTAAAAACCCAATTTATTACTATATTTTTAGGTGTAAATTTAAC  
ATTTTTTCCCAACACTTTTTAGGGCTAAGAGGAATGCCTCGGCGATATTCCGGAT  
TATCCAGATGCTTTCACTATCTGAAATGCCATTTTCATCTATTGGTTCCATTATTTT  
TCTCACAAGAATTATCTTTTTTTTTATTTATCTTATGAGAAAGGCTTTCTTCCCAAC  
GTAATCTTTGAGAACTTTAAATGTAACAACCTTCAATTGAATGGTTCAAGCCCTAC  
CCCCTAGTG

AQU12

ATTATTAGACAAGAAAGGGGGAAAAAAGAAGCTTTTGGACCTTAGGAATAATTTA  
TGCCATGATAGCTATCGGATTATTAGGATTCGTAGTCTGAGCTCACCATATATTT  
ACAGTAGATAGATGTAGATACCCGAGCTTACTTCACTTCAGCAACTATAATTATT  
GCGGTTCCAACACTGGGATTAAGTCTTTAGATGACTAGCCACCTTTTCATGGAAC  
CAAATTTTAAATAGACCAGTAACCCTGTGAGCTTTAGGTTTTGTATTTTTATTTAC  
AGTAGGAGGATTAACAGGGGTAATTTTAGCTAATTCTTCAATTGATATTATTCTTC  
ACGATACTTACTATGTAGTAGCTCATTTTTCACTATGTTCTTTCTATAGGAGCTGTA  
TTTGCAATTATAGCCGGAATTGTCCAATGATTCCCATTATTTACCGGACTAACCT  
TAAATAATTTTTTTTTAAAAACCCAATTTATTACTATATTTTTAGGTGTAAATTTAAC  
ATTTTTTCCCAACACTTTTTAGGGCTAAGAGGAATGCCTCGGCGATATTCCGGAT  
TATCCAGATGCTTTCACTATCTGAAATGCCATTTTCATCTATTGGTTCCATTATTTT  
TCTCACAAGAATTATCTTTTTTTTTATTTATCTTATGAGAAAGGCTTTCTTCCCAAC  
GTAATCTTTGAGAACTTTAAATGTAACAACCTTCAATTGAATGGTTCAAGCCCTAC  
CCCCTAGTG

AQU13

ATTATTAGACAAGAAAGGGGGAAAAAAGAAGCTTTTGGACCTTAGGAATAATTTA  
TGCCATGATAGCTATCGGATTATTAGGATTCGTAGTTTGGAGCTCACCATATATTT  
ACAGTAGATAGATGTAGATACCCGAGCTTACTTCACTTCAGCAACTATAATTATT  
GCGGTTCCAACACTGGGATTAAGTCTTTAGATGACTAGCCACCTTTTCATGGAAC  
CAAATTTTAAATAGACCAGTAACCCTGTGAGCTTTAGGTTTTGTATTTTTATTTAC  
AGTAGGAGGATTAACAGGGGTAATTTTAGCTAATTCTTCAATTGATATTATTCTTC  
ACGATACTTACTATGTAGTAGCTCATTTTTCACTATGTTCTTTCTATAGGAGCTGTA  
TTTGCAATTATAGCCGGAATTGTCCAATGATTCCCATTATTTACCGGACTAACCT  
TAAATAATTTTTTTTTAAAAACCCAATTTATTACTATATTTTTAGGTGTAAATTTAAC  
ATTTTTTCCCAACACTTTTTAGGGCTAAGAGGAATGCCTCGGCGATATTCCGGAT  
TATCCAGATGCTTTCACTATCTGAAATGCCATTTTCATCTATTGGTTCCATTATTTT  
TCTCACAAGAATTATCTTTTTTTTTATTTATCTTATGAGAAAGGCTTTCTTCCCAAC  
GTAATCTTTGAGAACTTTAAATGTAACAACCTTCAATTGAATGGTTCAAGCCCTAC  
CCCCTAGTG

AQU14

ATTATTAGACAAGAAAGGGGGAAAAAAGAAGCTTTTGGACCTTAGGAATAATTTA  
TGCCATGATAGCTATCGGATTATTAGGATTCGTAGTTTGGAGCTCACCATATATTT  
ACAGTAGATAGATGTAGATACCCGAGCTTACTTCACTTCAGCAACTATAATTATT  
GCGGTTCCAACACTGGGATTAAGTCTTTAGATGACTAGCCACCTTTTCATGGAAC  
CAAATTTTAAATAGACCAGTAACCCTGTGAGCTTTAGGTTTTGTATTTTTATTTAC  
AGTAGGAGGATTAACAGGGGTAATTTTAGCTAATTCTTCAATTGATATTATTCTTC  
ACGATACTTACTATGTAGTAGCTCATTTTTCACTATGTTCTTTCTATAGGAGCTGTA  
TTTGCAATTATAGCCGGAATTGTCCAATGATTCCCATTATTTACCGGACTAACCT  
TAAATAATTTTTTTTTAAAAACCCAATTTATTACTATATTTTTAGGTGTAAATTTAAC  
ATTTTTTCCCAACACTTTTTAGGGCTAAGAGGAATGCCTCGGCGATATTCCGGAT  
TATCCAGATGCTTTCACTATCTGAAATGCCATTTTCATCTATTGGTTCCATTATTTT

TCTCACAAGAATTATCTTTTTTTTTATTTATCTTATGAGAAAGGCTTTCTTCCCAAC  
GTAATCTTTGAGAACTTTAAATGTAACAACCTTCAATTGAATGGTTCAAGCCCTAC  
CCCCTAGTG

AQU4

ATTATTAGACAAGAAAGGGGGGAAAAAAGAAGCTTTTGGACCTTAGGAATAATTTA  
TGCCATGATAGCTATCGGATTATTAGGATTCGTAGTCTGAGCTCACCATATATTT  
ACAGTAGATAGATGTAGATACCCGAGCTTACTTCACTTCAGCAACTATAATTATT  
GCGGTTCCAACCTGGGATTAAGTCTTTAGATGACTAGCCACCTTTTCATGGAAC  
CAAATTTTAAATAGACCAGTAACCCTGTGAGCTTTAGGTTTTGTATTTTTATTTAC  
AGTAGGAGGATTAACAGGGGTAATTTAGCTAATTCTTCAATTGATATTATTCTTC  
ACGATACTTACTATGTAGTAGCTCATTTTCACTATGTTCTTTCTATAGGAGCTGTA  
TTTGCAATTATAGCCGGAATTGTCCAATGATTCCCATTATTTACCGGACTAACCT  
TAAATAATTTTTTTTTTAAAAACCCAATTTATTACTATATTTTTAGGTGTAAATTTAAC  
ATTTTTTCCCAACACTTTTTAGGGCTAAGAGGAATGCCTCGGCGATATTTCGGAT  
TATCCAGATGCTTTCACTATCTGAAATGCCATTTTCATCTATTGGTTCCATTATTTTC  
TCTCACAAGAATTATCTTTTTTTTTATTTATCTTATGAGAAAGGCTTTCTTCCCAAC  
GTAATCTTTGAGAACTTTAAATGTAACAACCTTCAATTGAATGGTTCAAGCCCTAC  
CCCCTAGTG

bj1

ATTATTAGACAAGAAAGGGGGGAAAAAAGAAGCTTTTGGACCTTAGGAATAATTTA  
TGCCATGATAGCTATCGGATTATTAGGATTCGTAGTTTGGAGCTCACCATATATTT  
ACAGTAGATAGATGTAGATACCCGAGCTTACTTCACTTCAGCAACTATAATTATT  
GCGGTTCCAACCTGGGATTAAGTCTTTAGATGACTAGCCACCTTTTCATGGAAC  
CAAATTTTAAATAGACCAGTAACCCTGTGAGCTTTAGGTTTTGTATTTTTATTTAC  
AGTAGGAGGATTAACAGGGGTAATTTAGCTAATTCTTCAATTGATATTATTCTTC  
ACGATACTTACTATGTAGTAGCTCATTTTCACTATGTTCTTTCTATAGGAGCTGTA  
TTTGCAATTATAGCCGGAATTGTCCAATGATTCCCATTATTTACCGGACTAACCT  
TAAATAATTTTTTTTTTAAAAACCCAATTTATTACTATATTTTTAGGTGTAAATTTAAC  
ATTTTTTCCCAACACTTTTTAGGGCTAAGAGGAATGCCTCGGCGATATTTCGGAT  
TATCCAGATGCTTTCACTATCTGAAATGCCATTTTCATCTATTGGTTCCATTATTTTC  
TCTCACAAGAATTATCTTTTTTTTTATTTATCTTATGAGAAAGGCTTTCTTCCCAAC  
GTAATCTTTGAGAACTTTAAATGTAACAACCTTCAATTGAATGGTTCAAGCCCTAC  
CCCCTAGTG

BJA2

ATTATTAGACAAGAAAGGGGGGAAAAAAGAAGCTTTTGGACCTTAGGAATAATTTA  
TGCCATGATAGCTATCGGATTATTAGGATTCGTAGTTTGGAGCTCACCATATATTT  
ACAGTAGATAGATGTAGATACCCGAGCTTACTTCACTTCAGCAACTATAATTATT  
GCGGTTCCAACCTGGGATTAAGTCTTTAGATGACTAGCCACCTTTTCATGGAAC  
CAAATTTTAAATAGACCAGTAACCCTGTGAGCTTTAGGTTTTGTATTTTTATTTAC  
AGTAGGAGGATTAACAGGGGTAATTTAGCTAATTCTTCAATTGATATTATTCTTC  
ACGATACTTACTATGTAGTAGCTCATTTTCACTATGTTCTTTCTATAGGAGCTGTA  
TTTGCAATTATAGCCGGAATTGTCCAATGATTCCCATTATTTACCGGACTAACCT  
TAAATAATTTTTTTTTTAAAAACCCAATTTATTACTATATTTTTAGGTGTAAATTTAAC  
ATTTTTTCCCAACACTTTTTAGGGCTAAGAGGAATGCCTCGGCGATATTTCGGAT  
TATCCAGATGCTTTCACTATCTGAAATGCCATTTTCATCTATTGGTTCCATTATTTTC  
TCTCACAAGAATTATCTTTTTTTTTATTTATCTTATGAGAAAGGCTTTCTTCCCAAC  
GTAATCTTTGAGAACTTTAAATGTAACAACCTTCAATTGAATGGTTCAAGCCCTAC  
CCCCTAGTG

BJA4

ATTATTAGACAAGAAAGGGGGGAAAAAAGAAGCTTTTGGACCTTAGGAATAATTTA

TGCCATGATAGCTATCGGATTATTAGGATTCGTAGTTTGAGCTCACCATATATTT  
ACAGTAGATAGATGTAGATACCCGAGCTTACTTCACTTCAGCAACTATAATTATT  
GCGGTTCCAACCTGGGATTAAGTCTTTAGATGACTAGCCACCTTTCATGGAAC  
CAAATTTTAAATAGACCAGTAACCCTGTGAGCTTTAGGTTTTGTATTTTTATTTAC  
AGTAGGAGGATTAACAGGGGTAATTTAGCTAATTCTTCAATTGATATTATTCTTC  
ACGATACTTACTATGTAGTAGCTCATTTTCACTATGTTCTTTCTATAGGAGCTGTA  
TTTGCAATTATAGCCGGAATTGTCCAATGATTCCCATTTTACCGGACTAACCT  
TAAATAATTTTTTTTTTAAAAACCCAATTTATTACTATATTTTTAGGTGTAAATTTAAC  
ATTTTTTCCCAACACTTTTTAGGGCTAAGAGGAATGCCTCGGCGATATTTCGGAT  
TATCCAGATGCTTTCCTATCTGAAATGCCATTTTCACTATTGGTTCCATTATTTTC  
TCTCACAAGAATTATCTTTTTTTTTATTTATCTTATGAGAAAGGCTTTCTTCCCAAC  
GTAATCTTTGAGAACTTTAAATGTAACAACCTTCAATTGAATGGTTCAAGCCCTAC  
CCCCTAGTG

CAM1

ATTATTAGACAAGAAAGGGGGGAAAAAAGAAGCTTTTGGACCTTAGGAATAATTTA  
TGCCATGATAGCTATCGGATTATTAGGATTCGTAGTTTGAGCTCACCATATATTT  
ACAGTAGATAGATGTAGATACCCGAGCTTACTTCACTTCAGCAACTATAATTATT  
GCGGTTCCAACCTGGGATTAAGTCTTTAGATGACTAGCCACCTTTCATGGAAC  
CAAATTTTAAATAGACCAGTAACCCTGTGAGCTTTAGGTTTTGTATTTTTATTTAC  
AGTAGGAGGATTAACAGGGGTAATTTAGCTAATTCTTCAATTGATATTATTCTTC  
ACGATACTTACTATGTAGTAGCTCATTTTCACTATGTTCTTTCTATAGGAGCTGTA  
TTTGCAATTATAGCCGGAATTGTCCAATGATTCCCATTTTACCGGACTAACCT  
TAAATAATTTTTTTTTTAAAAACCCAATTTATTACTATATTTTTAGGTGTAAATTTAAC  
ATTTTTTCCCAACACTTTTTAGGGCTAAGAGGAATGCCTCGGCGATATTTCGGAT  
TATCCAGATGCTTTCCTATCTGAAATGCCATTTTCACTATTGGTTCCATTATTTTC  
TCTCACAAGAATTATCTTTTTTTTTATTTATCTTATGAGAAAGGCTTTCTTCCCAAC  
GTAATCTTTGAGAACTTTAAATGTAACAACCTTCAATTGAATGGTTCAAGCCCTAC  
CCCCTAGTG

CAM2

ATTATTAGACAAGAAAGGGGGGAAAAAAGAAGCTTTTGGACCTTAGGAATAATTTA  
TGCCATGATAGCTATCGGATTATTAGGATTCGTAGTTTGAGCTCACCATATATTT  
ACAGTAGATAGATGTAGATACCCGAGCTTACTTCACTTCAGCAACTATAATTATT  
GCGGTTCCAACCTGGGATTAAGTCTTTAGATGACTAGCCACCTTTCATGGAAC  
CAAATTTTAAATAGACCAGTAACCCTGTGAGCTTTAGGTTTTGTATTTTTATTTAC  
AGTAGGAGGATTAACAGGGGTAATTTAGCTAATTCTTCAATTGATATTATTCTTC  
ACGATACTTACTATGTAGTAGCTCATTTTCACTATGTTCTTTCTATAGGAGCTGTA  
TTTGCAATTATAGCCGGAATTGTCCAATGATTCCCATTTTACCGGACTAACCT  
TAAATAATTTTTTTTTTAAAAACCCAATTTATTACTATATTTTTAGGTGTAAATTTAAC  
ATTTTTTCCCAACACTTTTTAGGGCTAAGAGGAATGCCTCGGCGATATTTCGGAT  
TATCCAGATGCTTTCCTATCTGAAATGCCATTTTCACTATTGGTTCCATTATTTTC  
TCTCACAAGAATTATCTTTTTTTTTATTTATCTTATGAGAAAGGCTTTCTTCCCAAC  
GTAATCTTTGAGAACTTTAAATGTAACAACCTTCAATTGAATGGTTCAAGCCCTAC  
CCCCTAGTG

CMO1\_1

ATTATTAGACAAGAAAGGGGGGAAAAAAGAAGCTTTTGGACCTTAGGAATAATTTA  
TGCCATGATAGCTATCGGATTATTAGGATTCGTAGTTTGAGCTCACCATATATTT  
ACAGTAGATAGATGTAGATACCCGAGCTTACTTCACTTCAGCAACTATAATTATT  
GCGGTTCCAACCTGGGATTAAGTCTTTAGATGACTAGCCACCTTTCATGGAAC  
CAAATTTTAAATAGACCAGTAACCCTGTGAGCTTTAGGTTTTGTATTTTTATTTAC  
AGTAGGAGGATTAACAGGGGTAATTTAGCTAATTCTTCAATTGATATTATTCTTC

ACGATACTTACTATGTAGTAGCTCATTTTTCACTATGTTCTTTCTATAGGAGCTGTA  
TTTGCAATTATAGCCGGAATTGTCCAATGATTCCCATTATTTACCGGACTAACCT  
TAAATAATTTTTTTTTAAAAACCCAATTTATTACTATATTTTTAGGTGTAAATTTAAC  
ATTTTTTCCCCAACACTTTTTAGGGCTAAGAGGAATGCCTCGGCGATATTCCGGAT  
TATCCAGATGCTTTCACTATCTGAAATGCCATTTTCATCTATTGGTTCCATTATTTT  
TCTCACAAGAATTATCTTTTTTTTTATTTATCTTATGAGAAAGGCTTTCTTCCCAAC  
GTAATCTTTGAGAACTTTAAATGTAACAACCTTCAATTGAATGGTTCAAGCCCTAC  
CCCCTAGTG

CMO1\_2

ATTATTAGACAAGAAAGGGGGAAAAAAGAAGCTTTTGGACCTTAGGAATAATTTA  
TGCCATGATAGCTATCGGATTATTAGGATTCGTAGTTTGAGCTCACCATATATTT  
ACAGTAGATAGATGTAGATACCCGAGCTTACTTCACTTCAGCAACTATAATTATT  
GCGGTTCCAACCTGGGATTAAGTCTTTAGATGACTAGCCACCTTTCATGGAACCT  
CAAATTTTAAATAGACCAGTAACCCTGTGAGCTTTAGGTTTTGTATTTTTATTTAC  
AGTAGGAGGATTAACAGGGGTAATTTTAGCTAATTCTTCAATTGATATTATTCTTC  
ACGATACTTACTATGTAGTAGCTCATTTTTCACTATGTTCTTTCTATAGGAGCTGTA  
TTTGCAATTATAGCCGGAATTGTCCAATGATTCCCATTATTTACCGGACTAACCT  
TAAATAATTTTTTTTTAAAAACCCAATTTATTACTATATTTTTAGGTGTAAATTTAAC  
ATTTTTTCCCCAACACTTTTTAGGGCTAAGAGGAATGCCTCGGCGATATTCCGGAT  
TATCCAGATGCTTTCACTATCTGAAATGCCATTTTCATCTATTGGTTCCATTATTTT  
TCTCACAAGAATTATCTTTTTTTTTATTTATCTTATGAGAAAGGCTTTCTTCCCAAC  
GTAATCTTTGAGAACTTTAAATGTAACAACCTTCAATTGAATGGTTCAAGCCCTAC  
CCCCTAGTG

CMO2\_1

ATTATTAGACAAGAAAGGGGGAAAAAAGAAGCTTTTGGACCTTAGGAATAATTTA  
TGCCATGATAGCTATCGGATTATTAGGATTCGTAGTTTGAGCTCACCATATATTT  
ACAGTAGATAGATGTAGATACCCGAGCTTACTTCACTTCAGCAACTATAATTATT  
GCGGTTCCAACCTGGGATTAAGTCTTTAGATGACTAGCCACCTTTCATGGAACCT  
CAAATTTTAAATAGACCAGTAACCCTGTGAGCTTTAGGTTTTGTATTTTTATTTAC  
AGTAGGAGGATTAACAGGGGTAATTTTAGCTAATTCTTCAATTGATATTATTCTTC  
ACGATACTTACTATGTAGTAGCTCATTTTTCACTATGTTCTTTCTATAGGAGCTGTA  
TTTGCAATTATAGCCGGAATTGTCCAATGATTCCCATTATTTACCGGACTAACCT  
TAAATAATTTTTTTTTAAAAACCCAATTTATTACTATATTTTTAGGTGTAAATTTAAC  
ATTTTTTCCCCAACACTTTTTAGGGCTAAGAGGAATGCCTCGGCGATATTCCGGAT  
TATCCAGATGCTTTCACTATCTGAAATGCCATTTTCATCTATTGGTTCCATTATTTT  
TCTCACAAGAATTATCTTTTTTTTTATTTATCTTATGAGAAAGGCTTTCTTCCCAAC  
GTAATCTTTGAGAACTTTAAATGTAACAACCTTCAATTGAATGGTTCAAGCCCTAC  
CCCCTAGTG

CMO2\_2

ATTATTAGACAAGAAAGGGGGAAAAAAGAAGCTTTTGGACCTTAGGAATAATTTA  
TGCCATGATAGCTATCGGATTATTAGGATTCGTAGTTTGAGCTCACCATATATTT  
ACAGTAGATAGATGTAGATACCCGAGCTTACTTCACTTCAGCAACTATAATTATT  
GCGGTTCCAACCTGGGATTAAGTCTTTAGATGACTAGCCACCTTTCATGGAACCT  
CAAATTTTAAATAGACCAGTAACCCTGTGAGCTTTAGGTTTTGTATTTTTATTTAC  
AGTAGGAGGATTAACAGGGGTAATTTTAGCTAATTCTTCAATTGATATTATTCTTC  
ACGATACTTACTATGTAGTAGCTCATTTTTCACTATGTTCTTTCTATAGGAGCTGTA  
TTTGCAATTATAGCCGGAATTGTCCAATGATTCCCATTATTTACCGGACTAACCT  
TAAATAATTTTTTTTTAAAAACCCAATTTATTACTATATTTTTAGGTGTAAATTTAAC  
ATTTTTTCCCCAACACTTTTTAGGGCTAAGAGGAATGCCTCGGCGATATTCCGGAT  
TATCCAGATGCTTTCACTATCTGAAATGCCATTTTCATCTATTGGTTCCATTATTTT

TCTCACAAGAATTATCTTTTTTTTTATTTATCTTATGAGAAAGGCTTTCTTCCCAAC  
GTAATCTTTGAGAACTTTAAATGTAACAACCTTCAATTGAATGGTTCAAGCCCTAC  
CCCCTAGTG

COI1

ATTATTAGACAAGAAAGGGGGGAAAAAAGAAGCTTTTGGACCTTAGGAATAATTTA  
TGCCATGATAGCTATCGGATTATTAGGATTCGTAGTTTGAGCTCACCATATATTT  
ACAGTAGATAGATGTAGATACCCGAGCTTACTTCACTTCAGCAACTATAATTATT  
GCGGTTCCAACCTGGGATTAAGTCTTTAGATGACTAGCCACCTTTTCATGGAAC  
CAAATTTTAAATAGACCAGTAACCCTGTGAGCTTTAGGTTTTGTATTTTTATTTAC  
AGTAGGAGGATTAACAGGGGTAATTTAGCTAATTCTTCAATTGATATTATTCTTC  
ACGATACTTACTATGTAGTAGCTCATTTTCACTATGTTCTTTCTATAGGAGCTGTA  
TTTGCAATTATAGCCGGAATTGTCCAATGATTCCCATTATTTACCGGACTAACCT  
TAAATAATTTTTTTTTAAAAACCCAATTTATTACTATATTTTTAGGTGTAAATTTAAC  
ATTTTTTCCCAACACTTTTTAGGGCTAAGAGGAATGCCTCGGCGATATTCGGAT  
TATCCAGATGCTTTCACTATCTGAAATGCCATTTTCATCTATTGGTTCCATTATTT  
TCTCACAAGAATTATCTTTTTTTTTATTTATCTTATGAGAAAGGCTTTCTTCCCAAC  
GTAATCTTTGAGAACTTTAAATGTAACAACCTTCAATTGAATGGTTCAAGCCCTAC  
CCCCTAGTG

CSJ1

ATTATTAGACAAGAAAGGGGGGAAAAAAGAAGCTTTTGGACCTTAGGAATAATTTA  
TGCCATGATAGCTATCGGATTATTAGGATTCGTAGTTTGAGCTCACCATATATTT  
ACAGTAGATAGATGTAGATACCCGAGCTTACTTCACTTCAGCAACTATAATTATT  
GCGGTTCCAACCTGGGATTAAGTCTTTAGATGACTAGCCACCTTTTCATGGAAC  
CAAATTTTAAATAGACCAGTAACCCTGTGAGCTTTAGGTTTTGTATTTTTATTTAC  
AGTAGGAGGATTAACAGGGGTAATTTAGCTAATTCTTCAATTGATATTATTCTTC  
ACGATACTTACTATGTAGTAGCTCATTTTCACTATGTTCTTTCTATAGGAGCTGTA  
TTTGCAATTATAGCCGGAATTGTCCAATGATTCCCATTATTTACCGGACTAACCT  
TAAATAATTTTTTTTTAAAAACCCAATTTATTACTATATTTTTAGGTGTAAATTTAAC  
ATTTTTTCCCAACACTTTTTAGGGCTAAGAGGAATGCCTCGGCGATATTCGGAT  
TATCCAGATGCTTTCACTATCTGAAATGCCATTTTCATCTATTGGTTCCATTATTT  
TCTCACAAGAATTATCTTTTTTTTTATTTATCTTATGAGAAAGGCTTTCTTCCCAAC  
GTAATCTTTGAGAACTTTAAATGTAACAACCTTCAATTGAATGGTTCAAGCCCTAC  
CCCCTAGTG

ERV1

ATTATTAGACAAGAAAGGGGGGAAAAAAGAAGCTTTTGGACCTTAGGAATAATTTA  
TGCCATGATAGCTATCGGATTATTAGGATTCGTAGTTTGAGCTCACCATATATTT  
ACAGTAGATAGATGTAGATACCCGAGCTTACTTCACTTCAGCAACTATAATTATT  
GCGGTTCCAACCTGGGATTAAGTCTTTAGATGACTAGCCACCTTTTCATGGAAC  
CAAATTTTAAATAGACCAGTAACCCTGTGAGCTTTAGGTTTTGTATTTTTATTTAC  
AGTAGGAGGATTAACAGGGGTAATTTAGCTAATTCTTCAATTGATATTATTCTTC  
ACGATACTTACTATGTAGTAGCTCATTTTCACTATGTTCTTTCTATAGGAGCTGTA  
TTTGCAATTATAGCCGGAATTGTCCAATGATTCCCATTATTTACCGGACTAACCT  
TAAATAATTTTTTTTTAAAAACCCAATTTATTACTATATTTTTAGGTGTAAATTTAAC  
ATTTTTTCCCAACACTTTTTAGGGCTAAGAGGAATGCCTCGGCGATATTCGGAT  
TATCCAGATGCTTTCACTATCTGAAATGCCATTTTCATCTATTGGTTCCATTATTT  
TCTCACAAGAATTATCTTTTTTTTTATTTATCTTATGAGAAAGGCTTTCTTCCCAAC  
GTAATCTTTGAGAACTTTAAATGTAACAACCTTCAATTGAATGGTTCAAGCCCTAC  
CCCCTAGTG

ERV2

ATTATTAGACAAGAAAGGGGGGAAAAAAGAAGCTTTTGGACCTTAGGAATAATTTA

TGCCATGATAGCTATCGGATTATTAGGATTCGTAGTTTGAGCTCACCATATATTT  
ACAGTAGATAGATGTAGATACCCGAGCTTACTTCACTTCAGCAACTATAATTATT  
GCGGTTCCAACACTGGGATTAAGTCTTTAGATGACTAGCCACCTTTCATGGAAC  
CAAATTTTAAATAGACCAGTAACCCTGTGAGCTTTAGGTTTTGTATTTTTATTTAC  
AGTAGGAGGATTAACAGGGGTAATTTAGCTAATTCTTCAATTGATATTATTCTTC  
ACGATACTTACTATGTAGTAGCTCATTTTCACTATGTTCTTTCTATAGGAGCTGTA  
TTTGCAATTATAGCCGGAATTGTCCAATGATTCCCATTTTACCGGACTAACCT  
TAAATAATTTTTTTTTTAAAAACCCAATTTATTACTATATTTTTAGGTGTAAATTTAAC  
ATTTTTTCCCAACACTTTTTAGGGCTAAGAGGAATGCCTCGGCGATATTGCGAT  
TATCCAGATGCTTTCCTATCTGAAATGCCATTTTCACTATTGGTTCCATTATTTTC  
TCTCACAAGAATTATCTTTTTTTTTATTTATCTTATGAGAAAGGCTTTCTTCCCAAC  
GTAATCTTTGAGAACTTTAAATGTAACAACCTTCAATTGAATGGTTCAAGCCCTAC  
CCCCTAGTG

GOV1

ATTATTAGACAAGAAAGGGGGGAAAAAAGAAGCTTTTGGACCTTAGGAATAATTTA  
TGCCATGATAGCTATCGGATTATTAGGATTCGTAGTTTGAGCTCACCATATATTT  
ACAGTAGATAGATGTAGATACCCGAGCTTACTTCACTTCAGCAACTATAATTATT  
GCGGTTCCAACACTGGGATTAAGTCTTTAGATGACTAGCCACCTTTCATGGAAC  
CAAATTTTAAATAGACCAGTAACCCTGTGAGCTTTAGGTTTTGTATTTTTATTTAC  
AGTAGGAGGATTAACAGGGGTAATTTAGCTAATTCTTCAATTGATATTATTCTTC  
ACGATACTTACTATGTAGTAGCTCATTTTCACTATGTTCTTTCTATAGGAGCTGTA  
TTTGCAATTATAGCCGGAATTGTCCAATGATTCCCATTTTACCGGACTAACCT  
TAAATAATTTTTTTTTTAAAAACCCAATTTATTACTATATTTTTAGGTGTAAATTTAAC  
ATTTTTTCCCAACACTTTTTAGGGCTAAGAGGAATGCCTCGGCGATATTGCGAT  
TATCCAGATGCTTTCCTATCTGAAATGCCATTTTCACTATTGGTTCCATTATTTTC  
TCTCACAAGAATTATCTTTTTTTTTATTTATCTTATGAGAAAGGCTTTCTTCCCAAC  
GTAATCTTTGAGAACTTTAAATGTAACAACCTTCAATTGAATGGTTCAAGCCCTAC  
CCCCTAGTG

GOV2

ATTATTAGACAAGAAAGGGGGGAAAAAAGAAGCTTTTGGACCTTAGGAATAATTTA  
TGCCATGATAGCTATCGGATTATTAGGATTCGTAGTTTGAGCTCACCATATATTT  
ACAGTAGATAGATGTAGATACCCGAGCTTACTTCACTTCAGCAACTATAATTATT  
GCGGTTCCAACACTGGGATTAAGTCTTTAGATGACTAGCCACCTTTCATGGAAC  
CAAATTTTAAATAGACCAGTAACCCTGTGAGCTTTAGGTTTTGTATTTTTATTTAC  
AGTAGGAGGATTAACAGGGGTAATTTAGCTAATTCTTCAATTGATATTATTCTTC  
ACGATACTTACTATGTAGTAGCTCATTTTCACTATGTTCTTTCTATAGGAGCTGTA  
TTTGCAATTATAGCCGGAATTGTCCAATGATTCCCATTTTACCGGACTAACCT  
TAAATAATTTTTTTTTTAAAAACCCAATTTATTACTATATTTTTAGGTGTAAATTTAAC  
ATTTTTTCCCAACACTTTTTAGGGCTAAGAGGAATGCCTCGGCGATATTGCGAT  
TATCCAGATGCTTTCCTATCTGAAATGCCATTTTCACTATTGGTTCCATTATTTTC  
TCTCACAAGAATTATCTTTTTTTTTATTTATCTTATGAGAAAGGCTTTCTTCCCAAC  
GTAATCTTTGAGAACTTTAAATGTAACAACCTTCAATTGAATGGTTCAAGCCCTAC  
CCCCTAGTG

HEM1

ATTATTAGACAAGAAAGGGGGGAAAAAAGAAGCTTTTGGACCTTAGGAATAATTTA  
TGCCATGATAGCTATCGGATTATTAGGATTCGTAGTTTGAGCTCACCATATATTT  
ACAGTAGATAGATGTAGATACCCGAGCTTACTTCACTTCAGCAACTATAATTATT  
GCGGTTCCAACACTGGGATTAAGTCTTTAGATGACTAGCCACCTTTCATGGAAC  
CAAATTTTAAATAGACCAGTAACCCTGTGAGCTTTAGGTTTTGTATTTTTATTTAC  
AGTAGGAGGATTAACAGGGGTAATTTAGCTAATTCTTCAATTGATATTATTCTTC

ACGATACTTACTATGTAGTAGCTCATTTTTCACTATGTTCTTTCTATAGGAGCTGTA  
TTTGCAATTATAGCCGGAATTGTCCAATGATTCCCATTATTTACCGGACTAACCT  
TAAATAATTTTTTTTTAAAAACCCAATTTATTACTATATTTTTAGGTGTAAATTTAAC  
ATTTTTTCCCAACACTTTTTAGGGCTAAGAGGAATGCCTCGGCGATATTCCGGAT  
TATCCAGATGCTTTCACTATCTGAAATGCCATTTTCATCTATTGGTTCCATTATTTT  
TCTCACAAGAATTATCTTTTTTTTTATTTATCTTATGAGAAAGGCTTTCTTCCCAAC  
GTAATCTTTGAGAACTTTAAATGTAACAACCTTCAATTGAATGGTTCAAGCCCTAC  
CCCCTAGTG

HEM2

ATTATTAGACAAGAAAGGGGGGAAAAAGAAGCTTTTGGACCTTAGGAATAATTTA  
TGCCATGATAGCTATCGGATTATTAGGATTCGTAGTTTGAGCTCACCATATATTT  
ACAGTAGATAGATGTAGATACCCGAGCTTACTTCACTTCAGCAACTATAATTATT  
GCGGTTCCAACCTGGGATTAAGTCTTTAGATGACTAGCCACCTTTCATGGAACCT  
CAAATTTTAAATAGACCAGTAACCCTGTGAGCTTTAGGTTTTGTATTTTTATTTAC  
AGTAGGAGGATTAACAGGGGTAATTTTAGCTAATTCTTCAATTGATATTATTCTTC  
ACGATACTTACTATGTAGTAGCTCATTTTTCACTATGTTCTTTCTATAGGAGCTGTA  
TTTGCAATTATAGCCGGAATTGTCCAATGATTCCCATTATTTACCGGACTAACCT  
TAAATAATTTTTTTTTAAAAACCCAATTTATTACTATATTTTTAGGTGTAAATTTAAC  
ATTTTTTCCCAACACTTTTTAGGGCTAAGAGGAATGCCTCGGCGATATTCCGGAT  
TATCCAGATGCTTTCACTATCTGAAATGCCATTTTCATCTATTGGTTCCATTATTTT  
TCTCACAAGAATTATCTTTTTTTTTATTTATCTTATGAGAAAGGCTTTCTTCCCAAC  
GTAATCTTTGAGAACTTTAAATGTAACAACCTTCAATTGAATGGTTCAAGCCCTAC  
CCCCTAGTG

HER1

ATTATTAGACAAGAAAGGGGGGAAAAAGAAGCTTTTGGACCTTAGGAATAATTTA  
TGCCATGATAGCTATCGGATTATTAGGATTCGTAGTTTGAGCTCACCATATATTT  
ACAGTAGATAGATGTAGATACCCGAGCTTACTTCACTTCAGCAACTATAATTATT  
GCGGTTCCAACCTGGGATTAAGTCTTTAGATGACTAGCCACCTTTCATGGAACCT  
CAAATTTTAAATAGACCAGTAACCCTGTGAGCTTTAGGTTTTGTATTTTTATTTAC  
AGTAGGAGGATTAACAGGGGTAATTTTAGCTAATTCTTCAATTGATATTATTCTTC  
ACGATACTTACTATGTAGTAGCTCATTTTTCACTATGTTCTTTCTATAGGAGCTGTA  
TTTGCAATTATAGCCGGAATTGTCCAATGATTCCCATTATTTACCGGACTAACCT  
TAAATAATTTTTTTTTAAAAACCCAATTTATTACTATATTTTTAGGTGTAAATTTAAC  
ATTTTTTCCCAACACTTTTTAGGGCTAAGAGGAATGCCTCGGCGATATTCCGGAT  
TATCCAGATGCTTTCACTATCTGAAATGCCATTTTCATCTATTGGTTCCATTATTTT  
TCTCACAAGAATTATCTTTTTTTTTATTTATCTTATGAGAAAGGCTTTCTTCCCAAC  
GTAATCTTTGAGAACTTTAAATGTAACAACCTTCAATTGAATGGTTCAAGCCCTAC  
CCCCTAGTG

HER2

ATTATTAGACAAGAAAGGGGGGAAAAAGAAGCTTTTGGACCTTAGGAATAATTTA  
TGCCATGATAGCTATCGGATTATTAGGATTCGTAGTTTGAGCTCACCATATATTT  
ACAGTAGATAGATGTAGATACCCGAGCTTACTTCACTTCAGCAACTATAATTATT  
GCGGTTCCAACCTGGGATTAAGTCTTTAGATGACTAGCCACCTTTCATGGAACCT  
CAAATTTTAAATAGACCAGTAACCCTGTGAGCTTTAGGTTTTGTATTTTTATTTAC  
AGTAGGAGGATTAACAGGGGTAATTTTAGCTAATTCTTCAATTGATATTATTCTTC  
ACGATACTTACTATGTAGTAGCTCATTTTTCACTATGTTCTTTCTATAGGAGCTGTA  
TTTGCAATTATAGCCGGAATTGTCCAATGATTCCCATTATTTACCGGACTAACCT  
TAAATAATTTTTTTTTAAAAACCCAATTTATTACTATATTTTTAGGTGTAAATTTAAC  
ATTTTTTCCCAACACTTTTTAGGGCTAAGAGGAATGCCTCGGCGATATTCCGGAT  
TATCCAGATGCTTTCACTATCTGAAATGCCATTTTCATCTATTGGTTCCATTATTTT



TCTCACAAGAATTATCTTTTTTTTTATTTATCTTATGAGAAAGGCTTTCTTCCCAAC  
GTAATCTTTGAGAACTTTAAATGTAACAACCTTCAATTGAATGGTTCAAGCCCTAC  
CCCCTAGTG

HEV1

ATTATTAGACAAGAAAGGGGGGAAAAAAGAAGCTTTTGGACCTTAGGAATAATTTA  
TGCCATGATAGCTATCGGATTATTAGGATTCGTAGTTTGAGCTCACCATATATTT  
ACAGTAGATAGATGTAGATACCCGAGCTTACTTCACTTCAGCAACTATAATTATT  
GCGGTTCCAACCTGGGATTAAGTCTTTAGATGACTAGCCACCTTTTCATGGAACCT  
CAAATTTTAAATAGACCAGTAACCCTGTGAGCTTTAGGTTTTGTATTTTTATTTAC  
AGTAGGAGGATTAACAGGGGTAATTTAGCTAATTCTTCAATTGATATTATTCTTC  
ACGATACTTACTATGTAGTAGCTCATTTTCACTATGTTCTTTCTATAGGAGCTGTA  
TTTGCAATTATAGCCGGAATTGTCCAATGATTCCCATTATTTACCGGACTAACCT  
TAAATAATTTTTTTTTAAAAACCCAATTTATTACTATATTTTTAGGTGTAAATTTAAC  
ATTTTTTCCCAACACTTTTTAGGGCTAAGAGGAATGCCTCGGCGATATTTCGGAT  
TATCCAGATGCTTTCACTATCTGAAATGCCATTTTCATCTATTGGTTCCATTATTTCT  
TCTCACAAGAATTATCTTTTTTTTTATTTATCTTATGAGAAAGGCTTTCTTCCCAAC  
GTAATCTTTGAGAACTTTAAATGTAACAACCTTCAATTGAATGGTTCAAGCCCTAC  
CCCCTAGTG

HEV1\_2

ATTATTAGACAAGAAAGGGGGGAAAAAAGAAGCTTTTGGACCTTAGGAATAATTTA  
TGCCATGATAGCTATCGGATTATTAGGATTCGTAGTTTGAGCTCACCATATATTT  
ACAGTAGATAGATGTAGATACCCGAGCTTACTTCACTTCAGCAACTATAATTATT  
GCGGTTCCAACCTGGGATTAAGTCTTTAGATGACTAGCCACCTTTTCATGGAACCT  
CAAATTTTAAATAGACCAGTAACCCTGTGAGCTTTAGGTTTTGTATTTTTATTTAC  
AGTAGGAGGATTAACAGGGGTAATTTAGCTAATTCTTCAATTGATATTATTCTTC  
ACGATACTTACTATGTAGTAGCTCATTTTCACTATGTTCTTTCTATAGGAGCTGTA  
TTTGCAATTATAGCCGGAATTGTCCAATGATTCCCATTATTTACCGGACTAACCT  
TAAATAATTTTTTTTTAAAAACCCAATTTATTACTATATTTTTAGGTGTAAATTTAAC  
ATTTTTTCCCAACACTTTTTAGGGCTAAGAGGAATGCCTCGGCGATATTTCGGAT  
TATCCAGATGCTTTCACTATCTGAAATGCCATTTTCATCTATTGGTTCCATTATTTCT  
TCTCACAAGAATTATCTTTTTTTTTATTTATCTTATGAGAAAGGCTTTCTTCCCAAC  
GTAATCTTTGAGAACTTTAAATGTAACAACCTTCAATTGAATGGTTCAAGCCCTAC  
CCCCTAGTG

HEV2

ATTATTAGACAAGAAAGGGGGGAAAAAAGAAGCTTTTGGACCTTAGGAATAATTTA  
TGCCATGATAGCTATCGGATTATTAGGATTCGTAGTTTGAGCTCACCATATATTT  
ACAGTAGATAGATGTAGATACCCGAGCTTACTTCACTTCAGCAACTATAATTATC  
GCGGTTCCAACCTGGGATTAAGTCTTTAGGTGACTAGCCACCTTTTCATGGAACCT  
CAAATTTTAAATAGACCAGTAACCCTGTGAGCTTTAGGTTTTGTATTTTTATTTAC  
AGTAGGAGGATTAACAGGGGTAATTTAGCTAATTCTTCAATTGATATTATTCTTC  
ACGATACTTACTATGTAGTAGCTCATTTTCACTATGTTCTTTCTATAGGAGCTGTA  
TTTGCAATTATAGCCGGAATTGTCCAATGATTCCCATTATTTACTGGACTAACCTT  
AAATAATTTTTTTTTAAAAACCCAATTTATTACTATATTTTTAGGTGTAAATTTAAC  
TTTTTTCCTCAACACTTTTTAGGGCTAAGAGGAATGCCTCGGCGATATTTCGGATT  
ATCCAGATGCTTTCACTATCTGAAATGCCATTTTCATCTATTGGTTCCATTATTTCT  
CTCACAAGAATTATCTTTTTTTTTATTTATCTTATGAGAAAGGCTTTCTTCCCAACG  
TAAATCTTTGAGAACTTTAAATGTAACAACCTTCAATTGAATGGTTCAAGCCCTACC  
CCCTAGTG

HEV2\_2

ATTATTAGACAAGAAAGGGGGGAAAAAAGAAGCTTTTGGACCTTAGGAATAATTTA

TGCCATGATAGCTATCGGATTATTAGGATTCGTAGTTTGAGCTCACCATATATTT  
ACAGTAGATAGATGTAGATACCCGAGCTTACTTCACTTCAGCAACTATAATTATC  
GCGGTTCCAACACTGGGATTAAGTCTTTAGGTGACTAGCCACCTTTCATGGAAC  
CAAATTTTAAATAGACCAGTAACCCTGTGAGCTTTAGGTTTTGTATTTTTATTTAC  
AGTAGGAGGATTAACAGGGGTAATTTAGCTAATTCTTCAATTGATATTATTCTTC  
ACGATACTTACTATGTAGTAGCTCATTTTCACTATGTTCTTTCTATAGGAGCTGTA  
TTTGCAATTATAGCCGGAATTGTCCAATGATTCCCATTATTTACTGGACTAACCTT  
AAATAATTTTTTTTTTAAAAACCCAATTTATTACTATATTTTTAGGTGTAAATTTAACA  
TTTTTTCCTCAACACTTTTTAGGGCTAAGAGGAATGCCTCGGCGATATTCGGATT  
ATCCAGATGCTTTCACTATCTGAAATGCCATTTTCACTATTGGTTCCATTATTTCT  
CTCACAAGAATTATCTTTTTTTTTATTTATCTTATGAGAAAGGCTTTCTTCCCAACG  
TAAATCTTTGAGAACTTTAAATGTAACAACCTTCAATTGAATGGTTCAAGCCCTACC  
CCCTAGTG

JAB2

ATTATTAGACAAGAAAGGGGGGAAAAAAGAAGCTTTTGGACCTTAGGAATAATTTA  
TGCCATGATAGCTATCGGATTATTAGGATTCGTAGTTTGAGCTCACCATATATTT  
ACAGTAGATAGATGTAGATACCCGAGCTTACTTCACTTCAGCAACTATAATTATT  
GCGGTTCCAACACTGGGATTAAGTCTTTAGATGACTAGCCACCTTTCATGGAAC  
CAAATTTTAAATAGACCAGTAACCCTGTGAGCTTTAGGTTTTGTATTTTTATTTAC  
AGTAGGAGGATTAACAGGGGTAATTTAGCTAATTCTTCAATTGATATTATTCTTC  
ACGATACTTACTATGTAGTAGCTCATTTTCACTATGTTCTTTCTATAGGAGCTGTA  
TTTGCAATTATAGCCGGAATTGTCCAATGATTCCCATTATTTACCGGACTAACCT  
TAAATAATTTTTTTTTTAAAAACCCAATTTATTACTATATTTTTAGGTGTAAATTTAACA  
ATTTTTTCCCAACACTTTTTAGGGCTAAGAGGAATGCCTCGGCGATATTCGGAT  
TATCCAGATGCTTTCACTATCTGAAATGCCATTTTCACTATTGGTTCCATTATTTCT  
TCTCACAAGAATTATCTTTTTTTTTATTTATCTTATGAGAAAGGCTTTCTTCCCAAC  
GTAATCTTTGAGAACTTTAAATGTAACAACCTTCAATTGAATGGTTCAAGCCCTAC  
CCCCTAGTG

JAB4

ATTATTAGACAAGAAAGGGGGGAAAAAAGAAGCTTTTGGACCTTAGGAATAATTTA  
TGCCATGATAGCTATCGGATTATTAGGATTCGTAGTTTGAGCTCACCATATATTT  
ACAGTAGATAGATGTAGATACCCGAGCTTACTTCACTTCAGCAACTATAATTATT  
GCGGTTCCAACACTGGGATTAAGTCTTTAGATGACTAGCCACCTTTCATGGAAC  
CAAATTTTAAATAGACCAGTAACCCTGTGAGCTTTAGGTTTTGTATTTTTATTTAC  
AGTAGGAGGATTAACAGGGGTAATTTAGCTAATTCTTCAATTGATATTATTCTTC  
ACGATACTTACTATGTAGTAGCTCATTTTCACTATGTTCTTTCTATAGGAGCTGTA  
TTTGCAATTATAGCCGGAATTGTCCAATGATTCCCATTATTTACCGGACTAACCT  
TAAATAATTTTTTTTTTAAAAACCCAATTTATTACTATATTTTTAGGTGTAAATTTAACA  
ATTTTTTCCCAACACTTTTTAGGGCTAAGAGGAATGCCTCGGCGATATTCGGAT  
TATCCAGATGCTTTCACTATCTGAAATGCCATTTTCACTATTGGTTCCATTATTTCT  
TCTCACAAGAATTATCTTTTTTTTTATTTATCTTATGAGAAAGGCTTTCTTCCCAAC  
GTAATCTTTGAGAACTTTAAATGTAACAACCTTCAATTGAATGGTTCAAGCCCTAC  
CCCCTAGTG

LAV1

ATTATTAGACAAGAAAGGGGGGAAAAAAGAAGCTTTTGGACCTTAGGAATAATTTA  
TGCCATGATAGCTATCGGATTATTAGGATTCGTAGTTTGAGCTCACCATATATTT  
ACAGTAGATAGATGTAGATACCCGAGCTTACTTCACTTCAGCAACTATAATTATT  
GCGGTTCCAACACTGGGATTAAGTCTTTAGATGACTAGCCACCTTTCATGGAAC  
CAAATTTTAAATAGACCAGTAACCCTGTGAGCTTTAGGTTTTGTATTTTTATTTAC  
AGTAGGAGGATTAACAGGGGTAATTTAGCTAATTCTTCAATTGATATTATTCTTC

ACGATACTTACTATGTAGTAGCTCATTTTTCACTATGTTCTTTCTATAGGAGCTGTA  
TTTGCAATTATAGCCGGAATTGTCCAATGATTCCCATTATTTACCGGACTAACCT  
TAAATAATTTTTTTTTAAAAACCCAATTTATTACTATATTTTTAGGTGTAAATTTAAC  
ATTTTTTCCCAACACTTTTTAGGGCTAAGAGGAATGCCTCGGCGATATTCCGGAT  
TATCCAGATGCTTTCACTATCTGAAATGCCATTTTCATCTATTGGTTCCATTATTTCT  
TCTCACAAGAATTATCTTTTTTTTTATTTATCTTATGAGAAAGGCTTTCTTCCCAAC  
GTAATCTTTGAGAACTTTAAATGTAACAACCTTCAATTGAATGGTTCAAGCCCTAC  
CCCCTAGTG

LAV2

ATTATTAGACAAGAAAGGGGGGAAAAAAGAAGCTTTTGGACCTTAGGAATAATTTA  
TGCCATGATAGCTATCGGATTATTAGGATTCGTAGTTTGAGCTCACCATATATTT  
ACAGTAGATAGATGTAGATACCCGAGCTTACTTCACTTCAGCAACTATAATTATT  
GCGGTTCCAACCTGGGATTAAGTCTTTAGATGACTAGCCACCTTTTCATGGAACCT  
CAAATTTTAAATAGACCAGTAACCCTGTGAGCTTTAGGTTTTGTATTTTTATTTAC  
AGTAGGAGGATTAACAGGGGTAATTTTAGCTAATTCTTCAATTGATATTATTCTTC  
ACGATACTTACTATGTAGTAGCTCATTTTTCACTATGTTCTTTCTATAGGAGCTGTA  
TTTGCAATTATAGCCGGAATTGTTCAATGATTCCCATTATTTACCGGACTAACCTT  
AAATAATTTTTTTTTAAAAACCCAATTTATTACTATATTTTTAGGTGTAAATTTAACA  
TTTTTTCCCAACACTTTTTAGGGCTAAGAGGAATGCCTCGGCGATATTCCGGATT  
ATCCAGATGCTTTCACTATCTGAAATGCCATTTTCATCTATTGGTTCCATTATTTCT  
CTCACAAGAATTATCTTTTTTTTTATTTATCTTATGAGAAAGGCTTTCTTCCCAACG  
TAAATCTTTGAGAACTTTAAATGTAACAACCTTCAATTGAATGGTTCAAGCCCTACC  
CCCTAGTG

MAC2

ATTATTAGACAAGAAAGGGGGGAAAAAAGAAGCTTTTGGACCTTAGGAATAATTTA  
TGCCATGATAGCTATCGGATTATTAGGATTCGTAGTTTGAGCTCACCATATATTT  
ACAGTAGATAGATGTAGATACCCGAGCTTACTTCACTTCAGCAACTATAATTATT  
GCGGTTCCAACCTGGGATTAAGTCTTTAGATGACTAGCCACCTTTTCATGGAACCT  
CAAATTTTAAATAGACCAGTAACCCTGTGAGCTTTAGGTTTTGTATTTTTATTTAC  
AGTAGGAGGATTAACAGGGGTAATTTTAGCTAATTCTTCAATTGATATTATTCTTC  
ACGATACTTACTATGTAGTAGCTCATTTTTCACTATGTTCTTTCTATAGGAGCTGTA  
TTTGCAATTATAGCCGGAATTGTCCAATGATTCCCATTATTTACCGGACTAACCT  
TAAATAATTTTTTTTTAAAAACCCAATTTATTACTATATTTTTAGGTGTAAATTTAAC  
ATTTTTTCCCAACACTTTTTAGGGCTAAGAGGAATGCCTCGGCGATATTCCGGAT  
TATCCAGATGCTTTCACTATCTGAAATGCCATTTTCATCTATTGGTTCCATTATTTCT  
TCTCACAAGAATTATCTTTTTTTTTATTTATCTTATGAGAAAGGCTTTCTTCCCAAC  
GTAATCTTTGAGAACTTTAAATGTAACAACCTTCAATTGAATGGTTCAAGCCCTAC  
CCCCTAGTG

MAC4

ATTATTAGACAAGAAAGGGGGGAAAAAAGAAGCTTTTGGACCTTAGGAATAATTTA  
TGCCATGATAGCTATCGGATTATTAGGATTCGTAGTTTGAGCTCACCATATATTT  
ACAGTAGATAGATGTAGATACCCGAGCTTACTTCACTTCAGCAACTATAATTATT  
GCGGTTCCAACCTGGGATTAAGTCTTTAGATGACTAGCCACCTTTTCATGGAACCT  
CAAATTTTAAATAGACCAGTAACCCTGTGAGCTTTAGGTTTTGTATTTTTATTTAC  
AGTAGGAGGATTAACAGGGGTAATTTTAGCTAATTCTTCAATTGATATTATTCTTC  
ACGATACTTACTATGTAGTAGCTCATTTTTCACTATGTTCTTTCTATAGGAGCTGTA  
TTTGCAATTATAGCCGGAATTGTCCAATGATTCCCATTATTTACCGGACTAACCT  
TAAATAATTTTTTTTTAAAAACCCAATTTATTACTATATTTTTAGGTGTAAATTTAAC  
ATTTTTTCCCAACACTTTTTAGGGCTAAGAGGAATGCCTCGGCGATATTCCGGAT  
TATCCAGATGCTTTCACTATCTGAAATGCCATTTTCATCTATTGGTTCCATTATTTCT

TCTCACAAGAATTATCTTTTTTTTTATTTATCTTATGAGAAAGGCTTTCTTCCCAAC  
GTAATCTTTGAGAACTTTAAATGTAACAACCTTCAATTGAATGGTTCAAGCCCTAC  
CCCCTAGTG

MAC6

ATTATTAGACAAGAAAGGGGGGAAAAAAGAAGCTTTTGGACCTTAGGAATAATTTA  
TGCCATGATAGCTATCGGATTATTAGGATTCGTAGTTTGAGCTCACCATATATTT  
ACAGTAGATAGATGTAGATACCCGAGCTTACTTCACTTCAGCAACTATAATTATT  
GCGGTTCCAACCTGGGATTAAGTCTTTAGATGACTAGCCACCTTTTCATGGAAC  
CAAATTTTAAATAGACCAGTAACCCTGTGAGCTTTAGGTTTTGTATTTTTATTTAC  
AGTAGGAGGATTAACAGGGGTAATTTAGCTAATTCTTCAATTGATATTATTCTTC  
ACGATACTTACTATGTAGTAGCTCATTTTCACTATGTTCTTTCTATAGGAGCTGTA  
TTTGCAATTATAGCCGGAATTGTCCAATGATTCCCATTATTTACCGGACTAACCT  
TAAATAATTTTTTTTTTAAAAACCCAATTTATTACTATATTTTTAGGTGTAAATTTAAC  
ATTTTTTCCCAACACTTTTTAGGGCTAAGAGGAATGCCTCGGCGATATTCGGAT  
TATCCAGATGCTTTCACTATCTGAAATGCCATTTTCATCTATTGGTTCCATTATTT  
TCTCACAAGAATTATCTTTTTTTTTATTTATCTTATGAGAAAGGCTTTCTTCCCAAC  
GTAATCTTTGAGAACTTTAAATGTAACAACCTTCAATTGAATGGTTCAAGCCCTAC  
CCCCTAGTG

MAR2\_1

ATTATTAGACAAGAAAGGGGGGAAAAAAGAAGCTTTTGGACCTTAGGAATAATTTA  
TGCCATGATAGCTATCGGATTATTAGGATTCGTAGTTTGAGCTCACCATATATTT  
ACAGTAGATAGATGTAGATACCCGAGCTTACTTCACTTCAGCAACTATAATTATT  
GCGGTTCCAACCTGGGATTAAGTCTTTAGATGACTAGCCACCTTTTCATGGAAC  
CAAATTTTAAATAGACCAGTAACCCTGTGAGCTTTAGGTTTTGTATTTTTATTTAC  
AGTAGGAGGATTAACAGGGGTAATTTAGCTAATTCTTCAATTGATATTATTCTTC  
ACGATACTTACTATGTAGTAGCTCATTTTCACTATGTTCTTTCTATAGGAGCTGTA  
TTTGCAATTATAGCCGGAATTGTCCAATGATTCCCATTATTTACCGGACTAACCT  
TAAATAATTTTTTTTTTAAAAACCCAATTTATTACTATATTTTTAGGTGTAAATTTAAC  
ATTTTTTCCCAACACTTTTTAGGGCTAAGAGGAATGCCTCGGCGATATTCGGAT  
TATCCAGATGCTTTCACTATCTGAAATGCCATTTTCATCTATTGGTTCCATTATTT  
TCTCACAAGAATTATCTTTTTTTTTATTTATCTTATGAGAAAGGCTTTCTTCCCAAC  
GTAATCTTTGAGAACTTTAAATGTAACAACCTTCAATTGAATGGTTCAAGCCCTAC  
CCCCTAGTG

MAR2\_2

ATTATTAGACAAGAAAGGGGGGAAAAAAGAAGCTTTTGGACCTTAGGAATAATTTA  
TGCCATGATAGCTATCGGATTATTAGGATTCGTAGTTTGAGCTCACCATATATTT  
ACAGTAGATAGATGTAGATACCCGAGCTTACTTCACTTCAGCAACTATAATTATT  
GCGGTTCCAACCTGGGATTAAGTCTTTAGATGACTAGCCACCTTTTCATGGAAC  
CAAATTTTAAATAGACCAGTAACCCTGTGAGCTTTAGGTTTTGTATTTTTATTTAC  
AGTAGGAGGATTAACAGGGGTAATTTAGCTAATTCTTCAATTGATATTATTCTTC  
ACGATACTTACTATGTAGTAGCTCATTTTCACTATGTTCTTTCTATAGGAGCTGTA  
TTTGCAATTATAGCCGGAATTGTCCAATGATTCCCATTATTTACCGGACTAACCT  
TAAATAATTTTTTTTTTAAAAACCCAATTTATTACTATATTTTTAGGTGTAAATTTAAC  
ATTTTTTCCCAACACTTTTTAGGGCTAAGAGGAATGCCTCGGCGATATTCGGAT  
TATCCAGATGCTTTCACTATCTGAAATGCCATTTTCATCTATTGGTTCCATTATTT  
TCTCACAAGAATTATCTTTTTTTTTATTTATCTTATGAGAAAGGCTTTCTTCCCAAC  
GTAATCTTTGAGAACTTTAAATGTAACAACCTTCAATTGAATGGTTCAAGCCCTAC  
CCCCTAGTG

MAR3\_1

ATTATTAGACAAGAAAGGGGGGAAAAAAGAAGCTTTTGGACCTTAGGAATAATTTA

TGCCATGATAGCTATCGGATTATTAGGATTCGTAGTTTGAGCTCACCATATATTT  
ACAGTAGATAGATGTAGATACCCGAGCTTACTTCACTTCAGCAACTATAATTATT  
GCGGTTCCAACACTGGGATTAAGTCTTTAGATGACTAGCCACCTTTCATGGAAC  
CAAATTTTAAATAGACCAGTAACCCTGTGAGCTTTAGGTTTTGTATTTTTATTTAC  
AGTAGGAGGATTAACAGGGGTAATTTAGCTAATTCTTCAATTGATATTATTCTTC  
ACGATACTTACTATGTAGTAGCTCATTTTCACTATGTTCTTTCTATAGGAGCTGTA  
TTTGCAATTATAGCCGGAATTGTCCAATGATTCCCATTTTACCGGACTAACCT  
TAAATAATTTTTTTTTTAAAAACCCAATTTATTACTATATTTTTAGGTGTAAATTTAAC  
ATTTTTTCCCAACACTTTTTAGGGCTAAGAGGAATGCCTCGGCGATATTTCGGAT  
TATCCAGATGCTTTCCTATCTGAAATGCCATTTTCACTATTGGTTCCATTATTTTC  
TCTCACAAGAATTATCTTTTTTTTTATTTATCTTATGAGAAAGGCTTTCTTCCCAAC  
GTAATCTTTGAGAACTTTAAATGTAACAACCTTCAATTGAATGGTTCAAGCCCTAC  
CCCCTAGTG

MAR3\_2

ATTATTAGACAAGAAAGGGGGGAAAAAAGAAGCTTTTGGACCTTAGGAATAATTTA  
TGCCATGATAGCTATCGGATTATTAGGATTCGTAGTTTGAGCTCACCATATATTT  
ACAGTAGATAGATGTAGATACCCGAGCTTACTTCACTTCAGCAACTATAATTATT  
GCGGTTCCAACACTGGGATTAAGTCTTTAGATGACTAGCCACCTTTCATGGAAC  
CAAATTTTAAATAGACCAGTAACCCTGTGAGCTTTAGGTTTTGTATTTTTATTTAC  
AGTAGGAGGATTAACAGGGGTAATTTAGCTAATTCTTCAATTGATATTATTCTTC  
ACGATACTTACTATGTAGTAGCTCATTTTCACTATGTTCTTTCTATAGGAGCTGTA  
TTTGCAATTATAGCCGGAATTGTCCAATGATTCCCATTTTACCGGACTAACCT  
TAAATAATTTTTTTTTTAAAAACCCAATTTATTACTATATTTTTAGGTGTAAATTTAAC  
ATTTTTTCCCAACACTTTTTAGGGCTAAGAGGAATGCCTCGGCGATATTTCGGAT  
TATCCAGATGCTTTCCTATCTGAAATGCCATTTTCACTATTGGTTCCATTATTTTC  
TCTCACAAGAATTATCTTTTTTTTTATTTATCTTATGAGAAAGGCTTTCTTCCCAAC  
GTAATCTTTGAGAACTTTAAATGTAACAACCTTCAATTGAATGGTTCAAGCCCTAC  
CCCCTAGTG

MOC1

ATTATTAGACAAGAAAGGGGGGAAAAAAGAAGCTTTTGGACCTTAGGAATAATTTA  
TGCCATGATAGCTATCGGATTATTAGGATTCGTAGTTTGAGCTCACCATATATTT  
ACAGTAGATAGATGTAGATACCCGAGCTTACTTCACTTCAGCAACTATAATTATT  
GCGGTTCCAACACTGGGATTAAGTCTTTAGATGACTAGCCACCTTTCATGGAAC  
CAAATTTTAAATAGACCAGTAACCCTGTGAGCTTTAGGTTTTGTATTTTTATTTAC  
AGTAGGAGGATTAACAGGGGTAATTTAGCTAATTCTTCAATTGATATTATTCTTC  
ACGATACTTACTATGTAGTAGCTCATTTTCACTATGTTCTTTCTATAGGAGCTGTA  
TTTGCAATTATAGCCGGAATTGTCCAATGATTCCCATTTTACCGGACTAACCT  
TAAATAATTTTTTTTTTAAAAACCCAATTTATTACTATATTTTTAGGTGTAAATTTAAC  
ATTTTTTCCCAACACTTTTTAGGGCTAAGAGGAATGCCTCGGCGATATTTCGGAT  
TATCCAGATGCTTTCCTATCTGAAATGCCATTTTCACTATTGGTTCCATTATTTTC  
TCTCACAAGAATTATCTTTTTTTTTATTTATCTTATGAGAAAGGCTTTCTTCCCAAC  
GTAATCTTTGAGAACTTTAAATGTAACAACCTTCAATTGAATGGTTCAAGCCCTAC  
CCCCTAGTG

MOC2

ATTATTAGACAAGAAAGGGGGGAAAAAAGAAGCTTTTGGACCTTAGGAATAATTTA  
TGCCATGATAGCTATCGGATTATTAGGATTCGTAGTTTGAGCTCACCATATATTT  
ACAGTAGATAGATGTAGATACCCGAGCTTACTTCACTTCAGCAACTATAATTATT  
GCGGTTCCAACACTGGGATTAAGTCTTTAGATGACTAGCCACCTTTCATGGAAC  
CAAATTTTAAATAGACCAGTAACCCTGTGAGCTTTAGGTTTTGTATTTTTATTTAC  
AGTAGGAGGATTAACAGGGGTAATTTAGCTAATTCTTCAATTGATATTATTCTTC

ACGATACTTACTATGTAGTAGCTCATTTTTCACTATGTTCTTTCTATAGGAGCTGTA  
TTTGCAATTATAGCCGGAATTGTCCAATGATTCCCATTATTTACCGGACTAACCT  
TAAATAATTTTTTTTTAAAAACCCAATTTATTACTATATTTTTAGGTGTAAATTTAAC  
ATTTTTTCCCAACACTTTTTAGGGCTAAGAGGAATGCCTCGGCGATATTCCGGAT  
TATCCAGATGCTTTCACTATCTGAAATGCCATTTTCATCTATTGGTTCCATTATTTT  
TCTCACAAGAATTATCTTTTTTTTTATTTATCTTATGAGAAAGGCTTTCTTCCCAAC  
GTAATCTTTGAGAACTTTAAATGTAACAACCTTCAATTGAATGGTTCAAGCCCTAC  
CCCCTAGTG

MOC2\_0

ATTATTAGACAAGAAAGGGGGAAAAAAGAAGCTTTTGGACCTTAGGAATAATTTA  
TGCCATGATAGCTATCGGATTATTAGGATTCGTAGTTTGAGCTCACCATATATTT  
ACAGTAGATAGATGTAGATACCCGAGCTTACTTCACTTCAGCAACTATAATTATT  
GCGGTTCCAACCTGGGATTAAGTCTTTAGATGACTAGCCACCTTTTCATGGAACCT  
CAAATTTTAAATAGACCAGTAACCCTGTGAGCTTTAGGTTTTGTATTTTTATTTAC  
AGTAGGAGGATTAACAGGGGTAATTTTAGCTAATTCTTCAATTGATATTATTCTTC  
ACGATACTTACTATGTAGTAGCTCATTTTTCACTATGTTCTTTCTATAGGAGCTGTA  
TTTGCAATTATAGCCGGAATTGTCCAATGATTCCCATTATTTACCGGACTAACCT  
TAAATAATTTTTTTTTAAAAACCCAATTTATTACTATATTTTTAGGTGTAAATTTAAC  
ATTTTTTCCCAACACTTTTTAGGGCTAAGAGGAATGCCTCGGCGATATTCCGGAT  
TATCCAGATGCTTTCACTATCTGAAATGCCATTTTCATCTATTGGTTCCATTATTTT  
TCTCACAAGAATTATCTTTTTTTTTATTTATCTTATGAGAAAGGCTTTCTTCCCAAC  
GTAATCTTTGAGAACTTTAAATGTAACAACCTTCAATTGAATGGTTCAAGCCCTAC  
CCCCTAGTG

MOC2\_1

ATTATTAGACAAGAAAGGGGGAAAAAAGAAGCTTTTGGACCTTAGGAATAATTTA  
TGCCATGATAGCTATCGGATTATTAGGATTCGTAGTTTGAGCTCACCATATATTT  
ACAGTAGATAGATGTAGATACCCGAGCTTACTTCACTTCAGCAACTATAATTATT  
GCGGTTCCAACCTGGGATTAAGTCTTTAGATGACTAGCCACCTTTTCATGGAACCT  
CAAATTTTAAATAGACCAGTAACCCTGTGAGCTTTAGGTTTTGTATTTTTATTTAC  
AGTAGGAGGATTAACAGGGGTAATTTTAGCTAATTCTTCAATTGATATTATTCTTC  
ACGATACTTACTATGTAGTAGCTCATTTTTCACTATGTTCTTTCTATAGGAGCTGTA  
TTTGCAATTATAGCCGGAATTGTCCAATGATTCCCATTATTTACCGGACTAACCT  
TAAATAATTTTTTTTTAAAAACCCAATTTATTACTATATTTTTAGGTGTAAATTTAAC  
ATTTTTTCCCAACACTTTTTAGGGCTAAGAGGAATGCCTCGGCGATATTCCGGAT  
TATCCAGATGCTTTCACTATCTGAAATGCCATTTTCATCTATTGGTTCCATTATTTT  
TCTCACAAGAATTATCTTTTTTTTTATTTATCTTATGAGAAAGGCTTTCTTCCCAAC  
GTAATCTTTGAGAACTTTAAATGTAACAACCTTCAATTGAATGGTTCAAGCCCTAC  
CCCCTAGTG

MOC3

ATTATTAGACAAGAAAGGGGGAAAAAAGAAGCTTTTGGACCTTAGGAATAATTTA  
TGCCATGATAGCTATCGGATTATTAGGATTCGTAGTTTGAGCTCACCATATATTT  
ACAGTAGATAGATGTAGATACCCGAGCTTACTTCACTTCAGCAACTATAATTATT  
GCGGTTCCAACCTGGGATTAAGTCTTTAGATGACTAGCCACCTTTTCATGGAACCT  
CAAATTTTAAATAGACCAGTAACCCTGTGAGCTTTAGGTTTTGTATTTTTATTTAC  
AGTAGGAGGATTAACAGGGGTAATTTTAGCTAATTCTTCAATTGATATTATTCTTC  
ACGATACTTACTATGTAGTAGCTCATTTTTCACTATGTTCTTTCTATAGGAGCTGTA  
TTTGCAATTATAGCCGGAATTGTCCAATGATTCCCATTATTTACCGGACTAACCT  
TAAATAATTTTTTTTTAAAAACCCAATTTATTACTATATTTTTAGGTGTAAATTTAAC  
ATTTTTTCCCAACACTTTTTAGGGCTAAGAGGAATGCCTCGGCGATATTCCGGAT  
TATCCAGATGCTTTCACTATCTGAAATGCCATTTTCATCTATTGGTTCCATTATTTT

TCTCACAAGAATTATCTTTTTTTTTATTTATCTTATGAGAAAGGCTTTCTTCCCAAC  
GTAATCTTTGAGAACTTTAAATGTAACAACCTTCAATTGAATGGTTCAAGCCCTAC  
CCCCTAGTG

MOC4

ATTATTAGACAAGAAAGGGGGGAAAAAAGAAGCTTTTGGACCTTAGGAATAATTTA  
TGCCATGATAGCTATCGGATTATTAGGATTCGTAGTTTGAGCTCACCATATATTT  
ACAGTAGATAGATGTAGATACCCGAGCTTACTTCACTTCAGCAACTATAATTATT  
GCGGTTCCAACCTGGGATTAAGTCTTTAGATGACTAGCCACCTTTTCATGGAAC  
CAAATTTTAAATAGACCAGTAACCCTGTGAGCTTTAGGTTTTGTATTTTTATTTAC  
AGTAGGAGGATTAACAGGGGTAATTTAGCTAATTCTTCAATTGATATTATTCTTC  
ACGATACTTACTATGTAGTAGCTCATTTTCACTATGTTCTTTCTATAGGAGCTGTA  
TTTGCAATTATAGCCGGAATTGTCCAATGATTCCCATTATTTACCGGACTAACCT  
TAAATAATTTTTTTTTAAAAACCCAATTTATTACTATATTTTTAGGTGTAAATTTAAC  
ATTTTTTCCCAACACTTTTTAGGGCTAAGAGGAATGCCTCGGCGATATTTCGGAT  
TATCCAGATGCTTTCACTATCTGAAATGCCATTTTCATCTATTGGTTCCATTATTTCT  
TCTCACAAGAATTATCTTTTTTTTTATTTATCTTATGAGAAAGGCTTTCTTCCCAAC  
GTAATCTTTGAGAACTTTAAATGTAACAACCTTCAATTGAATGGTTCAAGCCCTAC  
CCCCTAGTG

moc5

ATTATTAGACAAGAAAGGGGGGAAAAAAGAAGCTTTTGGACCTTAGGAATAATTTA  
TGCCATGATAGCTATCGGATTATTAGGATTCGTAGTTTGAGCTCACCATATATTT  
ACAGTAGATAGATGTAGATACCCGAGCTTACTTCACTTCAGCAACTATAATTATT  
GCGGTTCCAACCTGGGATTAAGTCTTTAGATGACTAGCCACCTTTTCATGGAAC  
CAAATTTTAAATAGACCAGTAACCCTGTGAGCTTTAGGTTTTGTATTTTTATTTAC  
AGTAGGAGGATTAACAGGGGTAATTTAGCTAATTCTTCAATTGATATTATTCTTC  
ACGATACTTACTATGTAGTAGCTCATTTTCACTATGTTCTTTCTATAGGAGCTGTA  
TTTGCAATTATAGCCGGAATTGTCCAATGATTCCCATTATTTACCGGACTAACCT  
TAAATAATTTTTTTTTAAAAACCCAATTTATTACTATATTTTTAGGTGTAAATTTAAC  
ATTTTTTCCCAACACTTTTTAGGGCTAAGAGGAATGCCTCGGCGATATTTCGGAT  
TATCCAGATGCTTTCACTATCTGAAATGCCATTTTCATCTATTGGTTCCATTATTTCT  
TCTCACAAGAATTATCTTTTTTTTTATTTATCTTATGAGAAAGGCTTTCTTCCCAAC  
GTAATCTTTGAGAACTTTAAATGTAACAACCTTCAATTGAATGGTTCAAGCCCTAC  
CCCCTAGTG

pit1

ATTATTAGACAAGAAAGGGGGGAAAAAAGAAGCTTTTGGACCTTAGGAATAATTTA  
TGCCATGATAGCTATCGGATTATTAGGATTCGTAGTTTGAGCTCACCATATATTT  
ACAGTAGATAGATGTAGATACCCGAGCTTACTTCACTTCAGCAACTATAATTATC  
GCGGTTCCAACCTGGGATTAAGTCTTTAGGTGACTAGCCACCTTTTCATGGAAC  
CAAATTTTAAATAGACCAGTAACCCTGTGAGCTTTAGGTTTTGTATTTTTATTTAC  
AGTAGGAGGATTAACAGGGGTAATTTAGCTAATTCTTCAATTGATATTATTCTTC  
ACGATACTTACTATGTAGTAGCTCATTTTCACTATGTTCTTTCTATAGGAGCTGTA  
TTTGCAATTATAGCCGGAATTGTCCAATGATTCCCATTATTTACTGGACTAACCTT  
AAATAATTTTTTTTTAAAAACCCAATTTATTACTATATTTTTAGGTGTAAATTTAAC  
TTTTTTCCTCAACACTTTTTAGGGCTAAGAGGAATGCCTCGGCGATATTTCGGATT  
ATCCAGATGCTTTCACTATCTGAAATGCCATTTTCATCTATTGGTTCCATTATTTCT  
CTCACAAGAATTATCTTTTTTTTTATTTATCTTATGAGAAAGGCTTTCTTCCCAACG  
TAAATCTTTGAGAACTTTAAATGTAACAACCTTCAATTGAATGGTTCAAGCCCTACC  
CCCTAGTG

PIT1\_1

ATTATTAGACAAGAAAGGGGGGAAAAAAGAAGCTTTTGGACCTTAGGAATAATTTA

TGCCATGATAGCTATCGGATTATTAGGATTCGTAGTTTGAGCTCACCATATATTT  
ACAGTAGATAGATGTAGATACCCGAGCTTACTTCACTTCAGCAACTATAATTATC  
GCGGTTCCAACACTGGGATTAAGTCTTTAGGTGACTAGCCACCTTTCATGGAAC  
CAAATTTTAAATAGACCAGTAACCCTGTGAGCTTTAGGTTTTGTATTTTTATTTAC  
AGTAGGAGGATTAACAGGGGTAATTTAGCTAATTCTTCAATTGATATTATTCTTC  
ACGATACTTACTATGTAGTAGCTCATTTTCACTATGTTCTTTCTATAGGAGCTGTA  
TTTGCAATTATAGCCGGAATTGTCCAATGATTCCCATTTACTGGACTAACCTT  
AAATAATTTTTTTTTAAAAACCCAATTTATTACTATATTTTTAGGTGTAAATTTAACA  
TTTTTTCCTCAACACTTTTTAGGGCTAAGAGGAATGCCTCGGCGATATTCGGATT  
ATCCAGATGCTTTCACTATCTGAAATGCCATTTTCACTATTGGTTCATTATTTCT  
CTCACAAGAATTATCTTTTTTTTTATTTATCTTATGAGAAAGGCTTTCTTCCCAACG  
TAAATCTTTGAGAACTTTAAATGTAACAACCTTCAATTGAATGGTTCAGCCCTACC  
CCCTAGTG

PIT1\_2

ATTATTAGACAAGAAAGGGGGGAAAAAAGAAGCTTTTGGACCTTAGGAATAATTTA  
TGCCATGATAGCTATCGGATTATTAGGATTCGTAGTTTGAGCTCACCATATATTT  
ACAGTAGATAGATGTAGATACCCGAGCTTACTTCACTTCAGCAACTATAATTATT  
GCGGTTCCAACACTGGGATTAAGTCTTTAGATGACTAGCCACCTTTCATGGAAC  
CAAATTTTAAATAGACCAGTAACCCTGTGAGCTTTAGGTTTTGTATTTTTATTTAC  
AGTAGGAGGATTAACAGGGGTAATTTAGCTAATTCTTCAATTGATATTATTCTTC  
ACGATACTTACTATGTAGTAGCTCATTTTCACTATGTTCTTTCTATAGGAGCTGTA  
TTTGCAATTATAGCCGGAATTGTCCAATGATTCCCATTTACTGGACTAACCTT  
AAATAATTTTTTTTTAAAAACCCAATTTATTACTATATTTTTAGGTGTAAATTTAACA  
TTTTTTCCTCAACACTTTTTAGGGCTAAGAGGAATGCCTCGGCGATATTCGGATT  
ATCCAGATGCTTTCACTATCTGAAATGCCATTTTCACTATTGGTTCATTATTTCT  
CTCACAAGAATTATCTTTTTTTTTATTTATCTTATGAGAAAGGCTTTCTTCCCAACG  
TAAATCTTTGAGAACTTTAAATGTAACAACCTTCAATTGAATGGTTCAGCCCTACC  
CCCTAGTG

pit2

ATTATTAGACAAGAAAGGGGGGAAAAAAGAAGCTTTTGGACCTTAGGAATAATTTA  
TGCCATGATAGCTATCGGATTATTAGGATTCGTAGTTTGAGCTCACCATATATTT  
ACAGTAGATAGATGTAGATACCCGAGCTTACTTCACTTCAGCAACTATAATTATC  
GCGGTTCCAACACTGGGATTAAGTCTTTAGGTGACTAGCCACCTTTCATGGAAC  
CAAATTTTAAATAGACCAGTAACCCTGTGAGCTTTAGGTTTTGTATTTTTATTTAC  
AGTAGGAGGATTAACAGGGGTAATTTAGCTAATTCTTCAATTGATATTATTCTTC  
ACGATACTTACTATGTAGTAGCTCATTTTCACTATGTTCTTTCTATAGGAGCTGTA  
TTTGCAATTATAGCCGGAATTGTCCAATGATTCCCATTTACTGGACTAACCTT  
AAATAATTTTTTTTTAAAAACCCAATTTATTACTATATTTTTAGGTGTAAATTTAACA  
TTTTTTCCTCAACACTTTTTAGGGCTAAGAGGAATGCCTCGGCGATATTCGGATT  
ATCCAGATGCTTTCACTATCTGAAATGCCATTTTCACTATTGGTTCATTATTTCT  
CTCACAAGAATTATCTTTTTTTTTATTTATCTTATGAGAAAGGCTTTCTTCCCAACG  
TAAATCTTTGAGAACTTTAAATGTAACAACCTTCAATTGAATGGTTCAGCCCTACC  
CCCTAGTG

pit4

ATTATTAGACAAGAAAGGGGGGAAAAAAGAAGCTTTTGGACCTTAGGAATAATTTA  
TGCCATGATAGCTATCGGATTATTAGGATTCGTAGTTTGAGCTCACCATATATTT  
ACAGTAGATAGATGTAGATACCCGAGCTTACTTCACTTCAGCAACTATAATTATT  
GCGGTTCCAACACTGGGATTAAGTCTTTAGATGACTAGCCACCTTTCATGGAAC  
CAAATTTTAAATAGACCAGTAACCCTGTGAGCTTTAGGTTTTGTATTTTTATTTAC  
AGTAGGAGGATTAACAGGGGTAATTTAGCTAATTCTTCAATTGATATTATTCTTC



ACGATACTTACTATGTAGTAGCTCATTTTTCACTATGTTCTTTCTATAGGAGCTGTA  
TTTGCAATTATAGCCGGAATTGTCCAATGATTCCCATTATTTACTGGACTAACCTT  
AAATAATTTTTTTTTAAAAACCCAATTTATTACTATATTTTTAGGTGTAAATTTAACA  
TTTTTTCCTCAACACTTTTTAGGGCTAAGAGGAATGCCTCGGCGATATTCGGATT  
ATCCAGATGCTTTCCTACTATCTGAAATGCCATTTTCATCTATTGGTTCCATTATTTCT  
CTCACAAGAATTATCTTTTTTTTTATTTATCTTATGAGAAAGGCTTTCTTCCCAACG  
TAAATCTTTGAGAACTTTAAATGTAACAACCTTCAATTGAATGGTTCAAGCCCTACC  
CCCTAGTG

RON1

ATTATTAGACAAGAAAGGGGGGAAAAAAGAAGCTTTTGGACCTTAGGAATAATTTA  
TGCCATGATAGCTATCGGATTATTAGGATTCGTAGTTTGAGCTCACCATATATTT  
ACAGTAGATAGATGTAGATACCCGAGCTTACTTCACTTCAGCAACTATAATTATT  
GCGGTTCCAACCTGGGATTAAGTCTTTAGATGACTAGCCACCTTTCATGGAACCT  
CAAATTTTAAATAGACCAGTAACCCTGTGAGCTTTAGGTTTTGTATTTTTATTTAC  
AGTAGGAGGATTAACAGGGGTAATTTTAGCTAATTCTTCAATTGATATTATTCTTC  
ACGATACTTACTATGTAGTAGCTCATTTTTCACTATGTTCTTTCTATAGGAGCTGTA  
TTTGCAATTATAGCCGGAATTGTCCAATGATTCCCATTATTTACCGGACTAACCT  
TAAATAATTTTTTTTTAAAAACCCAATTTATTACTATATTTTTAGGTGTAAATTTAAC  
ATTTTTTCCCAACACTTTTTAGGGCTAAGAGGAATGCCTCGGCGATATTCGGAT  
TATCCAGATGCTTTCCTACTATCTGAAATGCCATTTTCATCTATTGGTTCCATTATTTCT  
TCTCACAAGAATTATCTTTTTTTTTATTTATCTTATGAGAAAGGCTTTCTTCCCAAC  
GTAATCTTTGAGAACTTTAAATGTAACAACCTTCAATTGAATGGTTCAAGCCCTAC  
CCCCTAGTG

RON2

ATTATTAGACAAGAAAGGGGGGAAAAAAGAAGCTTTTGGACCTTAGGAATAATTTA  
TGCCATGATAGCTATCGGATTATTAGGATTCGTAGTTTGAGCTCACCATATATTT  
ACAGTAGATAGATGTAGATACCCGAGCTTACTTCACTTCAGCAACTATAATTATT  
GCGGTTCCAACCTGGGATTAAGTCTTTAGATGACTAGCCACCTTTCATGGAACCT  
CAAATTTTAAATAGACCAGTAACCCTGTGAGCTTTAGGTTTTGTATTTTTATTTAC  
AGTAGGAGGATTAACAGGGGTAATTTTAGCTAATTCTTCAATTGATATTATTCTTC  
ACGATACTTACTATGTAGTAGCTCATTTTTCACTATGTTCTTTCTATAGGAGCTGTA  
TTTGCAATTATAGCCGGAATTGTCCAATGATTCCCATTATTTACCGGACTAACCT  
TAAATAATTTTTTTTTAAAAACCCAATTTATTACTATATTTTTAGGTGTAAATTTAAC  
ATTTTTTCCCAACACTTTTTAGGGCTAAGAGGAATGCCTCGGCGATATTCGGAT  
TATCCAGATGCTTTCCTACTATCTGAAATGCCATTTTCATCTATTGGTTCCATTATTTCT  
TCTCACAAGAATTATCTTTTTTTTTATTTATCTTATGAGAAAGGCTTTCTTCCCAAC  
GTAATCTTTGAGAACTTTAAATGTAACAACCTTCAATTGAATGGTTCAAGCCCTAC  
CCCCTAGTG

ron3

ATTATTAGACAAGAAAGGGGGGAAAAAAGAAGCTTTTGGACCTTAGGAATAATTTA  
TGCCATGATAGCTATCGGATTATTAGGATTCGTAGTTTGAGCTCACCATATATTT  
ACAGTAGATAGATGTAGATACCCGAGCTTACTTCACTTCAGCAACTATAATTATT  
GCGGTTCCAACCTGGGATTAAGTCTTTAGATGACTAGCCACCTTTCATGGAACCT  
CAAATTTTAAATAGACCAGTAACCCTGTGAGCTTTAGGTTTTGTATTTTTATTTAC  
AGTAGGAGGATTAACAGGGGTAATTTTAGCTAATTCTTCAATTGATATTATTCTTC  
ACGATACTTACTATGTAGTAGCTCATTTTTCACTATGTTCTTTCTATAGGAGCTGTA  
TTTGCAATTATAGCCGGAATTGTCCAATGATTCCCATTATTTACCGGACTAACCT  
TAAATAATTTTTTTTTAAAAACCCAATTTATTACTATATTTTTAGGTGTAAATTTAAC  
ATTTTTTCCCAACACTTTTTAGGGCTAAGAGGAATGCCTCGGCGATATTCGGAT  
TATCCAGATGCTTTCCTACTATCTGAAATGCCATTTTCATCTATTGGTTCCATTATTTCT

TCTCACAAGAATTATCTTTTTTTTTATTTATCTTATGAGAAAGGCTTTCTTCCCAAC  
GTAATCTTTGAGAACTTTAAATGTAACAACCTTCAATTGAATGGTTCAAGCCCTAC  
CCCCTAGTG

RON4

ATTATTAGACAAGAAAGGGGGGAAAAAAGAAGCTTTTGGACCTTAGGAATAATTTA  
TGCCATGATAGCTATCGGATTATTAGGATTCGTAGTTTGAGCTCACCATATATTT  
ACAGTAGATAGATGTAGATACCCGAGCTTACTTCACTTCAGCAACTATAATTATT  
GCGGTTCCAACCTGGGATTAAGTCTTTAGATGACTAGCCACCTTTTCATGGAAC  
CAAATTTTAAATAGACCAGTAACCCTGTGAGCTTTAGGTTTTGTATTTTTATTTAC  
AGTAGGAGGATTAACAGGGGTAATTTAGCTAATTCTTCAATTGATATTATTCTTC  
ACGATACTTACTATGTAGTAGCTCATTTTCACTATGTTCTTTCTATAGGAGCTGTA  
TTTGCAATTATAGCCGGAATTGTCCAATGATTCCCATTATTTACCGGACTAACCT  
TAAATAATTTTTTTTTTAAAAACCCAATTTATTACTATATTTTTAGGTGTAAATTTAAC  
ATTTTTTCCCAACACTTTTTAGGGCTAAGAGGAATGCCTCGGCGATATTTCGGAT  
TATCCAGATGCTTTCACTATCTGAAATGCCATTTTCATCTATTGGTTCCATTATTTTC  
TCTCACAAGAATTATCTTTTTTTTTATTTATCTTATGAGAAAGGCTTTCTTCCCAAC  
GTAATCTTTGAGAACTTTAAATGTAACAACCTTCAATTGAATGGTTCAAGCCCTAC  
CCCCTAGTG

RON7

ATTATTAGACAAGAAAGGGGGGAAAAAAGAAGCTTTTGGACCTTAGGAATAATTTA  
TGCCATGATAGCTATCGGATTATTAGGATTCGTAGTTTGAGCTCACCATATATTT  
ACAGTAGATAGATGTAGATACCCGAGCTTACTTCACTTCAGCAACTATAATTATT  
GCGGTTCCAACCTGGGATTAAGTCTTTAGATGACTAGCCACCTTTTCATGGAAC  
CAAATTTTAAATAGACCAGTAACCCTGTGAGCTTTAGGTTTTGTATTTTTATTTAC  
AGTAGGAGGATTAACAGGGGTAATTTAGCTAATTCTTCAATTGATATTATTCTTC  
ACGATACTTACTATGTAGTAGCTCATTTTCACTATGTTCTTTCTATAGGAGCTGTA  
TTTGCAATTATAGCCGGAATTGTCCAATGATTCCCATTATTTACCGGACTAACCT  
TAAATAATTTTTTTTTTAAAAACCCAATTTATTACTATATTTTTAGGTGTAAATTTAAC  
ATTTTTTCCCAACACTTTTTAGGGCTAAGAGGAATGCCTCGGCGATATTTCGGAT  
TATCCAGATGCTTTCACTATCTGAAATGCCATTTTCATCTATTGGTTCCATTATTTTC  
TCTCACAAGAATTATCTTTTTTTTTATTTATCTTATGAGAAAGGCTTTCTTCCCAAC  
GTAATCTTTGAGAACTTTAAATGTAACAACCTTCAATTGAATGGTTCAAGCCCTAC  
CCCCTAGTG

SG01

ATTATTAGACAAGAAAGGGGGGAAAAAAGAAGCTTTTGGACCTTAGGAATAATTTA  
TGCCATGATAGCTATCGGATTATTAGGATTCGTAGTTTGAGCTCACCATATATTT  
ACAGTAGATAGATGTAGATACCCGAGCTTACTTCACTTCAGCAACTATAATTATT  
GCGGTTCCAACCTGGGATTAAGTCTTTAGATGACTAGCCACCTTTTCATGGAAC  
CAAATTTTAAATAGACCAGTAACCCTGTGAGCTTTAGGTTTTGTATTTTTATTTAC  
AGTAGGAGGATTAACAGGGGTAATTTAGCTAATTCTTCAATTGATATTATTCTTC  
ACGATACTTACTATGTAGTAGCTCATTTTCACTATGTTCTTTCTATAGGAGCTGTA  
TTTGCAATTATAGCCGGAATTGTCCAATGATTCCCATTATTTACCGGACTAACCT  
TAAATAATTTTTTTTTTAAAAACCCAATTTATTACTATATTTTTAGGTGTAAATTTAAC  
ATTTTTTCCCAACACTTTTTAGGGCTAAGAGGAATGCCTCGGCGATATTTCGGAT  
TATCCAGATGCTTTCACTATCTGAAATGCCATTTTCATCTATTGGTTCCATTATTTTC  
TCTCACAAGAATTATCTTTTTTTTTATTTATCTTATGAGAAAGGCTTTCTTCCCAAC  
GTAATCTTTGAGAACTTTAAATGTAACAACCTTCAATTGAATGGTTCAAGCCCTAC  
CCCCTAGTG

SG02

ATTATTAGACAAGAAAGGGGGGAAAAAAGAAGCTTTTGGACCTTAGGAATAATTTA

TGCCATGATAGCTATCGGATTATTAGGATTCGTAGTTTGAGCTCACCATATATTT  
ACAGTAGATAGATGTAGATACCCGAGCTTACTTCACTTCAGCAACTATAATTATT  
GCGGTTCCAACACTGGGATTAAGTCTTTAGATGACTAGCCACCTTTCATGGAAC  
CAAATTTTAAATAGACCAGTAACCCTGTGAGCTTTAGGTTTTGTATTTTTATTTAC  
AGTAGGAGGATTAACAGGGGTAATTTAGCTAATTCTTCAATTGATATTATTCTTC  
ACGATACTTACTATGTAGTAGCTCATTTTCACTATGTTCTTTCTATAGGAGCTGTA  
TTTGCAATTATAGCCGGAATTGTCCAATGATTCCCATTTTACCGGACTAACCT  
TAAATAATTTTTTTTTTAAAAACCCAATTTATTACTATATTTTTAGGTGTAAATTTAAC  
ATTTTTTCCCAACACTTTTTAGGGCTAAGAGGAATGCCTCGGCGATATTTCGGAT  
TATCCAGATGCTTTCCTATCTGAAATGCCATTTTCACTATTGGTTCCATTATTTTC  
TCTCACAAGAATTATCTTTTTTTTTATTTATCTTATGAGAAAGGCTTTCTTCCCAAC  
GTAATCTTTGAGAACTTTAAATGTAACAACCTTCAATTGAATGGTTCAAGCCCTAC  
CCCCTAGTG

SJA12

ATTATTAGACAAGAAAGGGGGGAAAAAAGAAGCTTTTGGACCTTAGGAATAATTTA  
TGCCATGATAGCTATCGGATTATTAGGATTCGTAGTTTGAGCTCACCATATATTT  
ACAGTAGATAGATGTAGATACCCGAGCTTACTTCACTTCAGCAACTATAATTATT  
GCGGTTCCAACACTGGGATTAAGTCTTTAGATGACTAGCCACCTTTCATGGAAC  
CAAATTTTAAATAGACCAGTAACCCTGTGAGCTTTAGGTTTTGTATTTTTATTTAC  
AGTAGGAGGATTAACAGGGGTAATTTAGCTAATTCTTCAATTGATATTATTCTTC  
ACGATACTTACTATGTAGTAGCTCATTTTCACTATGTTCTTTCTATAGGAGCTGTA  
TTTGCAATTATAGCCGGAATTGTCCAATGATTCCCATTTTACCGGACTAACCT  
TAAATAATTTTTTTTTTAAAAACCCAATTTATTACTATATTTTTAGGTGTAAATTTAAC  
ATTTTTTCCCAACACTTTTTAGGGCTAAGAGGAATGCCTCGGCGATATTTCGGAT  
TATCCAGATGCTTTCCTATCTGAAATGCCATTTTCACTATTGGTTCCATTATTTTC  
TCTCACAAGAATTATCTTTTTTTTTATTTATCTTATGAGAAAGGCTTTCTTCCCAAC  
GTAATCTTTGAGAACTTTAAATGTAACAACCTTCAATTGAATGGTTCAAGCCCTAC  
CCCCTAGTG

SJA13

ATTATTAGACAAGAAAGGGGGGAAAAAAGAAGCTTTTGGACCTTAGGAATAATTTA  
TGCCATGATAGCTATCGGATTATTAGGATTCGTAGTTTGAGCTCACCATATATTT  
ACAGTAGATAGATGTAGATACCCGAGCTTACTTCACTTCAGCAACTATAATTATT  
GCGGTTCCAACACTGGGATTAAGTCTTTAGATGACTAGCCACCTTTCATGGAAC  
CAAATTTTAAATAGACCAGTAACCCTGTGAGCTTTAGGTTTTGTATTTTTATTTAC  
AGTAGGAGGATTAACAGGGGTAATTTAGCTAATTCTTCAATTGATATTATTCTTC  
ACGATACTTACTATGTAGTAGCTCATTTTCACTATGTTCTTTCTATAGGAGCTGTA  
TTTGCAATTATAGCCGGAATTGTCCAATGATTCCCATTTTACCGGACTAACCT  
TAAATAATTTTTTTTTTAAAAACCCAATTTATTACTATATTTTTAGGTGTAAATTTAAC  
ATTTTTTCCCAACACTTTTTAGGGCTAAGAGGAATGCCTCGGCGATATTTCGGAT  
TATCCAGATGCTTTCCTATCTGAAATGCCATTTTCACTATTGGTTCCATTATTTTC  
TCTCACAAGAATTATCTTTTTTTTTATTTATCTTATGAGAAAGGCTTTCTTCCCAAC  
GTAATCTTTGAGAACTTTAAATGTAACAACCTTCAATTGAATGGTTCAAGCCCTAC  
CCCCTAGTG

SJA14

ATTATTAGACAAGAAAGGGGGGAAAAAAGAAGCTTTTGGACCTTAGGAATAATTTA  
TGCCATGATAGCTATCGGATTATTAGGATTCGTAGTTTGAGCTCACCATATATTT  
ACAGTAGATAGATGTAGATACCCGAGCTTACTTCACTTCAGCAACTATAATTATT  
GCGGTTCCAACACTGGGATTAAGTCTTTAGATGACTAGCCACCTTTCATGGAAC  
CAAATTTTAAATAGACCAGTAACCCTGTGAGCTTTAGGTTTTGTATTTTTATTTAC  
AGTAGGAGGATTAACAGGGGTAATTTAGCTAATTCTTCAATTGATATTATTCTTC

ACGATACTTACTATGTAGTAGCTCATTTTTCACTATGTTCTTTCTATAGGAGCTGTA  
TTTGCAATTATAGCCGGAATTGTCCAATGATTCCCATTATTTACCGGACTAACCT  
TAAATAATTTTTTTTTTAAAAACCCAATTTATTACTATATTTTTAGGTGTAAATTTAAC  
ATTTTTTCCCAACACTTTTTAGGGCTAAGAGGAATGCCTCGGCGATATTCCGGAT  
TATCCAGATGCTTTCACTATCTGAAATGCCATTTTCATCTATTGGTTCCATTATTTT  
TCTCACAAGAATTATCTTTTTTTTTATTTATCTTATGAGAAAGGCTTTCTTCCCAAC  
GTAATCTTTGAGAACTTTAAATGTAACAACCTTCAATTGAATGGTTCAAGCCCTAC  
CCCCTAGTG

SJA17

ATTATTAGACAAGAAAGGGGGGAAAAAAGAAGCTTTTGGACCTTAGGAATAATTTA  
TGCCATGATAGCTATCGGATTATTAGGATTCGTAGTTTGAGCTCACCATATATTT  
ACAGTAGATAGATGTAGATACCCGAGCTTACTTCACTTCAGCAACTATAATTATT  
GCGGTTCCAACACTGGGATTAAGTCTTTAGATGACTAGCCACCTTTTCATGGAAC  
CAAATTTTAAATAGACCAGTAACCCTGTGAGCTTTAGGTTTTGTATTTTTATTTAC  
AGTAGGAGGATTAACAGGGGTAATTTTAGCTAATTCTTCAATTGATATTATTCTTC  
ACGATACTTACTATGTAGTAGCTCATTTTTCACTATGTTCTTTCTATAGGAGCTGTA  
TTTGCAATTATAGCCGGAATTGTCCAATGATTCCCATTATTTACCGGACTAACCT  
TAAATAATTTTTTTTTTAAAAACCCAATTTATTACTATATTTTTAGGTGTAAATTTAAC  
ATTTTTTCCCAACACTTTTTAGGGCTAAGAGGAATGCCTCGGCGATATTCCGGAT  
TATCCAGATGCTTTCACTATCTGAAATGCCATTTTCATCTATTGGTTCCATTATTTT  
TCTCACAAGAATTATCTTTTTTTTTATTTATCTTATGAGAAAGGCTTTCTTCCCAAC  
GTAATCTTTGAGAACTTTAAATGTAACAACCTTCAATTGAATGGTTCAAGCCCTAC  
CCCCTAGTG

SJA3

ATTATTAGACAAGAAAGGGGGGAAAAAAGAAGCTTTTGGACCTTAGGAATAATTTA  
TGCCATGATAGCTATCGGATTATTAGGATTCGTAGTTTGAGCTCACCATATATTT  
ACAGTAGATAGATGTAGATACCCGAGCTTACTTCACTTCAGCAACTATAATTATT  
GCGGTTCCAACACTGGGATTAAGTCTTTAGATGACTAGCCACCTTTTCATGGAAC  
CAAATTTTAAATAGACCAGTAACCCTGTGAGCTTTAGGTTTTGTATTTTTATTTAC  
AGTAGGAGGATTAACAGGGGTAATTTTAGCTAATTCTTCAATTGATATTATTCTTC  
ACGATACTTACTATGTAGTAGCTCATTTTTCACTATGTTCTTTCTATAGGAGCTGTA  
TTTGCAATTATAGCCGGAATTGTCCAATGATTCCCATTATTTACCGGACTAACCT  
TAAATAATTTTTTTTTTAAAAACCCAATTTATTACTATATTTTTAGGTGTAAATTTAAC  
ATTTTTTCCCAACACTTTTTAGGGCTAAGAGGAATGCCTCGGCGATATTCCGGAT  
TATCCAGATGCTTTCACTATCTGAAATGCCATTTTCATCTATTGGTTCCATTATTTT  
TCTCACAAGAATTATCTTTTTTTTTATTTATCTTATGAGAAAGGCTTTCTTCCCAAC  
GTAATCTTTGAGAACTTTAAATGTAACAACCTTCAATTGAATGGTTCAAGCCCTAC  
CCCCTAGTG

SJA4

ATTATTAGACAAGAAAGGGGGGAAAAAAGAAGCTTTTGGACCTTAGGAATAATTTA  
TGCCATGATAGCTATCGGATTATTAGGATTCGTAGTTTGAGCTCACCATATATTT  
ACAGTAGATAGATGTAGATACCCGAGCTTACTTCACTTCAGCAACTATAATTATT  
GCGGTTCCAACACTGGGATTAAGTCTTTAGATGACTAGCCACCTTTTCATGGAAC  
CAAATTTTAAATAGACCAGTAACCCTGTGAGCTTTAGGTTTTGTATTTTTATTTAC  
AGTAGGAGGATTAACAGGGGTAATTTTAGCTAATTCTTCAATTGATATTATTCTTC  
ACGATACTTACTATGTAGTAGCTCATTTTTCACTATGTTCTTTCTATAGGAGCTGTA  
TTTGCAATTATAGCCGGAATTGTCCAATGATTCCCATTATTTACCGGACTAACCT  
TAAATAATTTTTTTTTTAAAAACCCAATTTATTACTATATTTTTAGGTGTAAATTTAAC  
ATTTTTTCCCAACACTTTTTAGGGCTAAGAGGAATGCCTCGGCGATATTCCGGAT  
TATCCAGATGCTTTCACTATCTGAAATGCCATTTTCATCTATTGGTTCCATTATTTT

TCTCACAAGAATTATCTTTTTTTTTATTTATCTTATGAGAAAGGCTTTCTTCCCAAC  
GTAATCTTTGAGAACTTTAAATGTAACAACCTTCAATTGAATGGTTCAAGCCCTAC  
CCCCTAGTG

SJA5

ATTATTAGACAAGAAAGGGGGGAAAAAAGAAGCTTTTGGACCTTAGGAATAATTTA  
TGCCATGATAGCTATCGGATTATTAGGATTCGTAGTTTGAGCTCACCATATATTT  
ACAGTAGATAGATGTAGATACCCGAGCTTACTTCACTTCAGCAACTATAATTATT  
GCGGTTCCAACCTGGGATTAAGTCTTTAGATGACTAGCCACCTTTTCATGGAAC  
CAAATTTTAAATAGACCAGTAACCCTGTGAGCTTTAGGTTTTGTATTTTTATTTAC  
AGTAGGAGGATTAACAGGGGTAATTTAGCTAATTCTTCAATTGATATTATTCTTC  
ACGATACTTACTATGTAGTAGCTCATTTTCACTATGTTCTTTCTATAGGAGCTGTA  
TTTGCAATTATAGCCGGAATTGTCCAATGATTCCCATTATTTACCGGACTAACCT  
TAAATAATTTTTTTTTTAAAAACCCAATTTATTACTATATTTTTAGGTGTAAATTTAAC  
ATTTTTTCCCAACACTTTTTAGGGCTAAGAGGAATGCCTCGGCGATATTCGGAT  
TATCCAGATGCTTTCACTATCTGAAATGCCATTTTCATCTATTGGTTCCATTATTT  
TCTCACAAGAATTATCTTTTTTTTTATTTATCTTATGAGAAAGGCTTTCTTCCCAAC  
GTAATCTTTGAGAACTTTAAATGTAACAACCTTCAATTGAATGGTTCAAGCCCTAC  
CCCCTAGTG

SMA1

ATTATTAGACAAGAAAGGGGGGAAAAAAGAAGCTTTTGGACCTTAGGAATAATTTA  
TGCCATGATAGCTATCGGATTATTAGGATTCGTAGTTTGAGCTCACCATATATTT  
ACAGTAGATAGATGTAGATACCCGAGCTTACTTCACTTCAGCAACTATAATTATT  
GCGGTTCCAACCTGGGATTAAGTCTTTAGATGACTAGCCACCTTTTCATGGAAC  
CAAATTTTAAATAGACCAGTAACCCTGTGAGCTTTAGGTTTTGTATTTTTATTTAC  
AGTAGGAGGATTAACAGGGGTAATTTAGCTAATTCTTCAATTGATATTATTCTTC  
ACGATACTTACTATGTAGTAGCTCATTTTCACTATGTTCTTTCTATAGGAGCTGTA  
TTTGCAATTATAGCCGGAATTGTCCAATGATTCCCATTATTTACCGGACTAACCT  
TAAATAATTTTTTTTTTAAAAACCCAATTTATTACTATATTTTTAGGTGTAAATTTAAC  
ATTTTTTCCCAACACTTTTTAGGGCTAAGAGGAATGCCTCGGCGATATTCGGAT  
TATCCAGATGCTTTCACTATCTGAAATGCCATTTTCATCTATTGGTTCCATTATTT  
TCTCACAAGAATTATCTTTTTTTTTATTTATCTTATGAGAAAGGCTTTCTTCCCAAC  
GTAATCTTTGAGAACTTTAAATGTAACAACCTTCAATTGAATGGTTCAAGCCCTAC  
CCCCTAGTG

SMA10

ATTATTAGACAAGAAAGGGGGGAAAAAAGAAGCTTTTGGACCTTAGGAATAATTTA  
TGCCATGATAGCTATCGGATTATTAGGATTCGTAGTTTGAGCTCACCATATATTT  
ACAGTAGATAGATGTAGATACCCGAGCTTACTTCACTTCAGCAACTATAATTATT  
GCGGTTCCAACCTGGGATTAAGTCTTTAGATGACTAGCCACCTTTTCATGGAAC  
CAAATTTTAAATAGACCAGTAACCCTGTGAGCTTTAGGTTTTGTATTTTTATTTAC  
AGTAGGAGGATTAACAGGGGTAATTTAGCTAATTCTTCAATTGATATTATTCTTC  
ACGATACTTACTATGTAGTAGCTCATTTTCACTATGTTCTTTCTATAGGAGCTGTA  
TTTGCAATTATAGCCGGAATTGTCCAATGATTCCCATTATTTACCGGACTAACCT  
TAAATAATTTTTTTTTTAAAAACCCAATTTATTACTATATTTTTAGGTGTAAATTTAAC  
ATTTTTTCCCAACACTTTTTAGGGCTAAGAGGAATGCCTCGGCGATATTCGGAT  
TATCCAGATGCTTTCACTATCTGAAATGCCATTTTCATCTATTGGTTCCATTATTT  
TCTCACAAGAATTATCTTTTTTTTTATTTATCTTATGAGAAAGGCTTTCTTCCCAAC  
GTAATCTTTGAGAACTTTAAATGTAACAACCTTCAATTGAATGGTTCAAGCCCTAC  
CCCCTAGTG

SMA11

ATTATTAGACAAGAAAGGGGGGAAAAAAGAAGCTTTTGGACCTTAGGAATAATTTA

TGCCATGATAGCTATCGGATTATTAGGATTCGTAGTTTGAGCTCACCATATATTT  
ACAGTAGATAGATGTAGATACCCGAGCTTACTTCACTTCAGCAACTATAATTATT  
GCGGTTCCAACACTGGGATTAAGTCTTTAGATGACTAGCCACCTTTCATGGAAC  
CAAATTTTAAATAGACCAGTAACCCTGTGAGCTTTAGGTTTTGTATTTTTATTTAC  
AGTAGGAGGATTAACAGGGGTAATTTAGCTAATTCTTCAATTGATATTATTCTTC  
ACGATACTTACTATGTAGTAGCTCATTTTCACTATGTTCTTTCTATAGGAGCTGTA  
TTTGCAATTATAGCCGGAATTGTCCAATGATTCCCATTTTACCGGACTAACCT  
TAAATAATTTTTTTTTTAAAAACCCAATTTATTACTATATTTTTAGGTGTAAATTTAAC  
ATTTTTTCCCAACACTTTTTAGGGCTAAGAGGAATGCCTCGGCGATATTGCGGAT  
TATCCAGATGCTTTCCTATCTGAAATGCCATTTTCACTATTGGTTCCATTATTTTC  
TCTCACAAGAATTATCTTTTTTTTTATTTATCTTATGAGAAAGGCTTTCTTCCCAAC  
GTAATCTTTGAGAACTTTAAATGTAACAACCTTCAATTGAATGGTTCAAGCCCTAC  
CCCCTAGTG

SMA12

ATTATTAGACAAGAAAGGGGGGAAAAAAGAAGCTTTTGGACCTTAGGAATAATTTA  
TGCCATGATAGCTATCGGATTATTAGGATTCGTAGTTTGAGCTCACCATATATTT  
ACAGTAGATAGATGTAGATACCCGAGCTTACTTCACTTCAGCAACTATAATTATT  
GCGGTTCCAACACTGGGATTAAGTCTTTAGATGACTAGCCACCTTTCATGGAAC  
CAAATTTTAAATAGACCAGTAACCCTGTGAGCTTTAGGTTTTGTATTTTTATTTAC  
AGTAGGAGGATTAACAGGGGTAATTTAGCTAATTCTTCAATTGATATTATTCTTC  
ACGATACTTACTATGTAGTAGCTCATTTTCACTATGTTCTTTCTATAGGAGCTGTA  
TTTGCAATTATAGCCGGAATTGTCCAATGATTCCCATTTTACCGGACTAACCT  
TAAATAATTTTTTTTTTAAAAACCCAATTTATTACTATATTTTTAGGTGTAAATTTAAC  
ATTTTTTCCCAACACTTTTTAGGGCTAAGAGGAATGCCTCGGCGATATTGCGGAT  
TATCCAGATGCTTTCCTATCTGAAATGCCATTTTCACTATTGGTTCCATTATTTTC  
TCTCACAAGAATTATCTTTTTTTTTATTTATCTTATGAGAAAGGCTTTCTTCCCAAC  
GTAATCTTTGAGAACTTTAAATGTAACAACCTTCAATTGAATGGTTCAAGCCCTAC  
CCCCTAGTG

SMA13

ATTATTAGACAAGAAAGGGGGGAAAAAAGAAGCTTTTGGACCTTAGGAATAATTTA  
TGCCATGATAGCTATCGGATTATTAGGATTCGTAGTTTGAGCTCACCATATATTT  
ACAGTAGATAGATGTAGATACCCGAGCTTACTTCACTTCAGCAACTATAATTATT  
GCGGTTCCAACACTGGGATTAAGTCTTTAGATGACTAGCCACCTTTCATGGAAC  
CAAATTTTAAATAGACCAGTAACCCTGTGAGCTTTAGGTTTTGTATTTTTATTTAC  
AGTAGGAGGATTAACAGGGGTAATTTAGCTAATTCTTCAATTGATATTATTCTTC  
ACGATACTTACTATGTAGTAGCTCATTTTCACTATGTTCTTTCTATAGGAGCTGTA  
TTTGCAATTATAGCCGGAATTGTCCAATGATTCCCATTTTACCGGACTAACCT  
TAAATAATTTTTTTTTTAAAAACCCAATTTATTACTATATTTTTAGGTGTAAATTTAAC  
ATTTTTTCCCAACACTTTTTAGGGCTAAGAGGAATGCCTCGGCGATATTGCGGAT  
TATCCAGATGCTTTCCTATCTGAAATGCCATTTTCACTATTGGTTCCATTATTTTC  
TCTCACAAGAATTATCTTTTTTTTTATTTATCTTATGAGAAAGGCTTTCTTCCCAAC  
GTAATCTTTGAGAACTTTAAATGTAACAACCTTCAATTGAATGGTTCAAGCCCTAC  
CCCCTAGTG

SMA14

ATTATTAGACAAGAAAGGGGGGAAAAAAGAAGCTTTTGGACCTTAGGAATAATTTA  
TGCCATGATAGCTATCGGATTATTAGGATTCGTAGTTTGAGCTCACCATATATTT  
ACAGTAGATAGATGTAGATACCCGAGCTTACTTCACTTCAGCAACTATAATTATT  
GCGGTTCCAACACTGGGATTAAGTCTTTAGATGACTAGCCACCTTTCATGGAAC  
CAAATTTTAAATAGACCAGTAACCCTGTGAGCTTTAGGTTTTGTATTTTTATTTAC  
AGTAGGAGGATTAACAGGGGTAATTTAGCTAATTCTTCAATTGATATTATTCTTC

ACGATACTTACTATGTAGTAGCTCATTTTTCACTATGTTCCCTTCTATAGGAGCTGTA  
TTTGCAATTATAGCCGGAATTGTCCAATGATTCCCATTATTTACCGGACTAACCT  
TAAATAATTTTTTTTTTAAAAACCCAATTTATTACTATATTTTTAGGTGTAAATTTAAC  
ATTTTTTCCCAACACTTTTTAGGGCTAAGAGGAATGCCTCGGCGATATTCCGGAT  
TATCCAGATGCTTTCACTATCTGAAATGCCATTTTCATCTATTGGTTCCATTATTTTC  
TCTCACAAGAATTATCTTTTTTTTTATTTATCTTATGAGAAAGGCTTTCTTCCCAAC  
GTAATCTTTGAGAACTTTAAATGTAACAACCTTCAATTGAATGGTTCAAGCCCTAC  
CCCCTAGTG

SMA6

ATTATTAGACAAGAAAGGGGGGAAAAAGAAGCTTTTGGACCTTAGGAATAATTTA  
TGCCATGATAGCTATCGGATTATTAGGATTCGTAGTTTGAGCTCACCATATATTT  
ACAGTAGATAGATGTAGATACCCGAGCTTACTTCACTTCAGCAACTATAATTATT  
GCGGTTCCAACCTGGGATTAAGTCTTTAGATGACTAGCCACCTTTCATGGAACCT  
CAAATTTTAAATAGACCAGTAACCCTGTGAGCTTTAGGTTTTGTATTTTTATTTAC  
AGTAGGAGGATTAACAGGGGTAATTTTAGCTAATTCTTCAATTGATATTATTCTTC  
ACGATACTTACTATGTAGTAGCTCATTTTTCACTATGTTCTTTCTATAGGAGCTGTA  
TTTGCAATTATAGCCGGAATTGTCCAATGATTCCCATTATTTACCGGACTAACCT  
TAAATAATTTTTTTTTTAAAAACCCAATTTATTACTATATTTTTAGGTGTAAATTTAAC  
ATTTTTTCCCAACACTTTTTAGGGCTAAGAGGAATGCCTCGGCGATATTCCGGAT  
TATCCAGATGCTTTCACTATCTGAAATGCCATTTTCATCTATTGGTTCCATTATTTTC  
TCTCACAAGAATTATCTTTTTTTTTATTTATCTTATGAGAAAGGCTTTCTTCCCAAC  
GTAATCTTTGAGAACTTTAAATGTAACAACCTTCAATTGAATGGTTCAAGCCCTAC  
CCCCTAGTG

SMI1

ATTATTAGACAAGAAAGGGGGGAAAAAGAAGCTTTTGGACCTTAGGAATAATTTA  
TGCCATGATAGCTATCGGATTATTAGGATTCGTAGTTTGAGCTCACCATATATTT  
ACAGTAGATAGATGTAGATACCCGAGCTTACTTCACTTCAGCAACTATAATTATT  
GCGGTTCCAACCTGGGATTAAGTCTTTAGATGACTAGCCACCTTTCATGGAACCT  
CAAATTTTAAATAGACCAGTAACCCTGTGAGCTTTAGGTTTTGTATTTTTATTTAC  
AGTAGGAGGATTAACAGGGGTAATTTTAGCTAATTCTTCAATTGATATTATTCTTC  
ACGATACTTACTATGTAGTAGCTCATTTTTCACTATGTTCTTTCTATAGGAGCTGTA  
TTTGCAATTATAGCCGGAATTGTCCAATGATTCCCATTATTTACCGGACTAACCT  
TAAATAATTTTTTTTTTAAAAACCCAATTTATTACTATATTTTTAGGTGTAAATTTAAC  
ATTTTTTCCCAACACTTTTTAGGGCTAAGAGGAATGCCTCGGCGATATTCCGGAT  
TATCCAGATGCTTTCACTATCTGAAATGCCATTTTCATCTATTGGTTCCATTATTTTC  
TCTCACAAGAATTATCTTTTTTTTTATTTATCTTATGAGAAAGGCTTTCTTCCCAAC  
GTAATCTTTGAGAACTTTAAATGTAACAACCTTCAATTGAATGGTTCAAGCCCTAC  
CCCCTAGTG

SMI2

ATTATTAGACAAGAAAGGGGGGAAAAAGAAGCTTTTGGACCTTAGGAATAATTTA  
TGCCATGATAGCTATCGGATTATTAGGATTCGTAGTTTGAGCTCACCATATATTT  
ACAGTAGATAGATGTAGATACCCGAGCTTACTTCACTTCAGCAACTATAATTATT  
GCGGTTCCAACCTGGGATTAAGTCTTTAGATGACTAGCCACCTTTCATGGAACCT  
CAAATTTTAAATAGACCAGTAACCCTGTGAGCTTTAGGTTTTGTATTTTTATTTAC  
AGTAGGAGGATTAACAGGGGTAATTTTAGCTAATTCTTCAATTGATATTATTCTTC  
ACGATACTTACTATGTAGTAGCTCATTTTTCACTATGTTCTTTCTATAGGAGCTGTA  
TTTGCAATTATAGCCGGAATTGTCCAATGATTCCCATTATTTACCGGACTAACCT  
TAAATAATTTTTTTTTTAAAAACCCAATTTATTACTATATTTTTAGGTGTAAATTTAAC  
ATTTTTTCCCAACACTTTTTAGGGCTAAGAGGAATGCCTCGGCGATATTCCGGAT  
TATCCAGATGCTTTCACTATCTGAAATGCCATTTTCATCTATTGGTTCCATTATTTTC

TCTCACAAGAATTATCTTTTTTTTTATTTATCTTATGAGAAAGGCTTTCTTCCCAAC  
GTAATCTTTGAGAACTTTAAATGTAACAACCTTCAATTGAATGGTTCAAGCCCTAC  
CCCCTAGTG

sob1

ATTATTAGACAAGAAAGGGGGGAAAAAAGAAGCTTTTGGACCTTAGGAATAATTTA  
TGCCATGATAGCTATCGGATTATTAGGATTCGTAGTTTGAGCTCACCATATATTT  
ACAGTAGATAGATGTAGATACCCGAGCTTACTTCACTTCAGCAACTATAATTATT  
GCGGTTCCAACCTGGGATTAAGTCTTTAGATGACTAGCCACCTTTTCATGGAAC  
CAAATTTTAAATAGACCAGTAACCCTGTGAGCTTTAGGTTTTGTATTTTTATTTAC  
AGTAGGAGGATTAACGGGGGTAATTTAGCTAATTCTTCAATTGATATTATTCTTC  
ACGATACTTACTATGTAGTAGCTCATTTTCACTATGTTCTTTCTATAGGAGCTGTA  
TTTGCAATTATAGCCGGAATTGTCCAATGATTCCCATTATTTACCGGACTAACCT  
TAAATAATTTTTTTTTAAAAACCCAATTTATTACTATATTTTTAGGTGTAAATTTAAC  
ATTTTTTCCCAACACTTTTTAGGGCTAAGAGGAATGCCTCGGCGATATTCGGAT  
TATCCAGATGCTTTCACTATCTGAAATGCCATTTTCATCTATTGGTTCCATTATTTCT  
TCTCACAAGAATTATCTTTTTTTTTATTTATCTTATGAGAAAGGCTTTCTTCCCAAC  
GTAATCTTTGAGAACTTTAAATGTAACAACCTTCAATTGAATGGTTCAAGCCCTAC  
CCCCTAGTG

SOB10

ATTATTAGACAAGAAAGGGGGGAAAAAAGAAGCTTTTGGACCTTAGGAATAATTTA  
TGCCATGATAGCTATCGGATTATTAGGATTCGTAGTTTGAGCTCACCATATATTT  
ACAGTAGATAGATGTAGATACCCGAGCTTACTTCACTTCAGCAACTATAATTATC  
GCGGTTCCAACCTGGGATTAAGTCTTTAGGTGACTAGCCACCTTTTCATGGAAC  
CAAATTTTAAATAGACCAGTAACCCTGTGAGCTTTAGGTTTTGTATTTTTATTTAC  
AGTAGGAGGATTAACAGGGGTAATTTAGCTAATTCTTCAATTGATATTATTCTTC  
ACGATACTTACTATGTAGTAGCTCATTTTCACTATGTTCTTTCTATAGGAGCTGTA  
TTTGCAATTATAGCCGGAATTGTCCAATGATTCCCATTATTTACTGGACTAACCTT  
AAATAATTTTTTTTTAAAAACCCAATTTATTACTATATTTTTAGGTGTAAATTTAACA  
TTTTTTCCTCAACACTTTTTAGGGCTAAGAGGGATGCCTCGGCGATATTCGGATT  
ATCCAGATGCTTTCACTATCTGAAATGCCATTTTCATCTATTGGTTCCATTATTTCT  
CTCACAAGAATTATCTTTTTTTTTATTTATCTTATGAGAAAGGCTTTCTTCCCAACG  
TAAATCTTTGAGAACTTTAAATGTAACAACCTTCAATTGAATGGTTCAAGCCCTACC  
CCCTAGTG

SOB12

ATTATTAGACAAGAAAGGGGGGAAAAAAGAAGCTTTTGGACCTTAGGAATAATTTA  
TGCCATGATAGCTATCGGATTATTAGGATTCGTAGTTTGAGCTCACCATATATTT  
ACAGTAGATAGATGTAGATACCCGAGCTTACTTCACTTCAGCAACTATAATTATC  
GCGGTTCCAACCTGGGATTAAGTCTTTAGGTGACTAGCCACCTTTTCATGGAAC  
CAAATTTTAAATAGACCAGTAACCCTGTGAGCTTTAGGTTTTGTATTTTTATTTAC  
AGTAGGAGGATTAACAGGGGTAATTTAGCTAATTCTTCAATTGATATTATTCTTC  
ACGATACTTACTATGTAGTAGCTCATTTTCACTATGTTCTTTCTATAGGAGCTGTA  
TTTGCAATTATAGCCGGAATTGTCCAATGATTCCCATTATTTACTGGACTAACCTT  
AAATAATTTTTTTTTAAAAACCCAATTTATTACTATATTTTTAGGTGTAAATTTAACA  
TTTTTTCCTCAACACTTTTTAGGGCTAAGAGGAATGCCTCGGCGATATTCGGATT  
ATCCAGATGCTTTCACTATCTGAAATGCCATTTTCATCTATTGGTTCCATTATTTCT  
CTCACAAGAATTATCTTTTTTTTTATTTATCTTATGAGAAAGGCTTTCTTCCCAACG  
TAAATCTTTGAGAACTTTAAATGTAACAACCTTCAATTGAATGGTTCAAGCCCTACC  
CCCTAGTG

SOB1\_2

ATTATTAGACAAGAAAGGGGGGAAAAAAGAAGCTTTTGGACCTTAGGAATAATTTA



TGCCATGATAGCTATCGGATTATTAGGATTCGTAGTTTGAGCTCACCATATATTT  
ACAGTAGATAGATGTAGATACCCGAGCTTACTTCACTTCAGCAACTATAATTATC  
GCGGTTCCAACACTGGGATTAAGTCTTTAGGTGACTAGCCACCTTTCATGGAAC  
CAAATTTTAAATAGACCAGTAACCCTGTGAGCTTTAGGTTTTGTATTTTTATTTAC  
AGTAGGAGGATTAACAGGGGTAATTTAGCTAATTCTTCAATTGATATTATTCTTC  
ACGATACTTACTATGTAGTAGCTCATTTTCACTATGTTCTTTCTATAGGAGCTGTA  
TTTGCAATTATAGCCGGAATTGTCCAATGATTCCCATTATTTACTGGACTAACCTT  
AAATAATTTTTTTTTTAAAAACCCAATTTATTACTATATTTTTAGGTGTAAATTTAACA  
TTTTTTCCTCAACACTTTTTAGGGCTAAGAGGAATGCCTCGGCGATATTCGGATT  
ATCCAGATGCTTTCACTATCTGAAATGCCATTTTCATCTATTGGTTCCATTATTTCT  
CTCACAAGAATTATCTTTTTTTTTATTTATCTTATGAGAAAGGCTTTCTTCCCAACG  
TAAATCTTTGAGAACTTTAAATGTAACAACCTTCAATTGAATGGTTCAAGCCCTACC  
CCCTAGTG

SOB2

ATTATTAGACAAGAAAGGGGGGAAAAAAGAAGCTTTTGGACCTTAGGAATAATTTA  
TGCCATGATAGCTATCGGATTATTAGGATTCGTAGTTTGAGCTCACCATATATTT  
ACAGTAGATAGATGTAGATACCCGAGCTTACTTCACTTCAGCAACTATAATTATT  
GCGGTTCCAACACTGGGATTAAGTCTTTAGATGACTAGCCACCTTTCATGGAAC  
CAAATTTTAAATAGACCAGTAACCCTGTGAGCTTTAGGTTTTGTATTTTTATTTAC  
AGTAGGAGGATTAACAGGGGTAATTTAGCTAATTCTTCAATTGATATTATTCTTC  
ACGATACTTACTATGTAGTAGCTCATTTTCACTATGTTCTTTCTATAGGAGCTGTA  
TTTGCAATTATAGCCGGAATTGTCCAATGATTCCCATTATTTACCGGACTAACCT  
TAAATAATTTTTTTTTTAAAAACCCAATTTATTACTATATTTTTAGGTGTAAATTTAACA  
ATTTTTTCCCAACACTTTTTAGGGCTAAGAGGAATGCCTCGGCGATATTCGGAT  
TATCCAGATGCTTTCACTATCTGAAATGCCATTTTCATCTATTGGTTCCATTATTTCT  
TCTCACAAGAATTATCTTTTTTTTTATTTATCTTATGAGAAAGGCTTTCTTCCCAAC  
GTAATCTTTGAGAACTTTAAATGTAACAACCTTCAATTGAATGGTTCAAGCCCTAC  
CCCTAGTG

SOB2\_1

ATTATTAGACAAGAAAGGGGGGAAAAAAGAAGCTTTTGGACCTTAGGAATAATTTA  
TGCCATGATAGCTATCGGATTATTAGGATTCGTAGTTTGAGCTCACCATATATTT  
ACAGTAGATAGATGTAGATACCCGAGCTTACTTCACTTCAGCAACTATAATTATC  
GCGGTTCCAACACTGGGATTAAGTCTTTAGGTGACTAGCCACCTTTCATGGAAC  
CAAATTTTAAATAGACCAGTAACCCTGTGAGCTTTAGGTTTTGTATTTTTATTTAC  
AGTAGGAGGATTAACAGGGGTAATTTAGCTAATTCTTCAATTGATATTATTCTTC  
ACGATACTTACTATGTAGTAGCTCATTTTCACTATGTTCTTTCTATAGGAGCTGTA  
TTTGCAATTATAGCCGGAATTGTCCAATGATTCCCATTATTTACTGGACTAACCTT  
AAATAATTTTTTTTTTAAAAACCCAATTTATTACTATATTTTTAGGTGTAAATTTAACA  
TTTTTTCCTCAACACTTTTTAGGGCTAAGAGGAATGCCTCGGCGATATTCGGATT  
ATCCAGATGCTTTCACTATCTGAAATGCCATTTTCATCTATTGGTTCCATTATTTCT  
CTCACAAGAATTATCTTTTTTTTTATTTATCTTATGAGAAAGGCTTTCTTCCCAACG  
TAAATCTTTGAGAACTTTAAATGTAACAACCTTCAATTGAATGGTTCAAGCCCTACC  
CCCTAGTG

TAP1

ATTATTAGACAAGAAAGGGGGGAAAAAAGAAGCTTTTGGACCTTAGGAATAATTTA  
TGCCATGATAGCTATCGGATTATTAGGATTCGTAGTTTGAGCTCACCATATATTT  
ACAGTAGATAGATGTAGATACCCGAGCTTACTTCACTTCAGCAACTATAATTATT  
GCGGTTCCAACACTGGGATTAAGTCTTTAGATGACTAGCCACCTTTCATGGAAC  
CAAATTTTAAATAGACCAGTAACCCTGTGAGCTTTAGGTTTTGTATTTTTATTTAC  
AGTAGGAGGATTAACAGGGGTAATTTAGCTAATTCTTCAATTGATATTATTCTTC

ACGATACTTACTATGTAGTAGCTCATTTTTCACTATGTTCTTTCTATAGGAGCTGTA  
TTTGCAATTATAGCCGGAATTGTCCAATGATTCCCATTATTTACCGGACTAACCT  
TAAATAATTTTTTTTTAAAAACCCAATTTATTACTATATTTTTAGGTGTAAATTTAAC  
ATTTTTTCCCAACACTTTTTAGGGCTAAGAGGAATGCCTCGGCGATATTCCGGAT  
TATCCAGATGCTTTCACTATCTGAAATGCCATTTTCATCTATTGGTTCCATTATTTT  
TCTCACAAGAATTATCTTTTTTTTTATTTATCTTATGAGAAAGGCTTTCTTCCCAAC  
GTAATCTTTGAGAACTTTAAATGTAACAACCTTCAATTGAATGGTTCAAGCCCTAC  
CCCCTAGTG

TAP2

ATTATTAGACAAGAAAGGGGGGAAAAAAGAAGCTTTTGGACCTTAGGAATAATTTA  
TGCCATGATAGCTATCGGATTATTAGGATTCGTAGTTTGAGCTCACCATATATTT  
ACAGTAGATAGATGTAGATACCCGAGCTTACTTCACTTCAGCAACTATAATTATT  
GCGGTTCCAACCTGGGATTAAGTCTTTAGATGACTAGCCACCTTTCATGGAACCT  
CAAATTTTAAATAGACCAGTAACCCTGTGAGCTTTAGGTTTTGTATTTTTATTTAC  
AGTAGGAGGATTAACAGGGGTAATTTTAGCTAATTCTTCAATTGATATTATTCTTC  
ACGATACTTACTATGTAGTAGCTCATTTTTCACTATGTTCTTTCTATAGGAGCTGTA  
TTTGCAATTATAGCCGGAATTGTCCAATGATTCCCATTATTTACCGGACTAACCT  
TAAATAATTTTTTTTTAAAAACCCAATTTATTACTATATTTTTAGGTGTAAATTTAAC  
ATTTTTTCCCAACACTTTTTAGGGCTAAGAGGAATGCCTCGGCGATATTCCGGAT  
TATCCAGATGCTTTCACTATCTGAAATGCCATTTTCATCTATTGGTTCCATTATTTT  
TCTCACAAGAATTATCTTTTTTTTTATTTATCTTATGAGAAAGGCTTTCTTCCCAAC  
GTAATCTTTGAGAACTTTAAATGTAACAACCTTCAATTGAATGGTTCAAGCCCTAC  
CCCCTAGTG

tol1

ATTATTAGACAAGAAAGGGGGGAAAAAAGAAGCTTTTGGACCTTAGGAATAATTTA  
TGCCATGATAGCTATCGGATTATTAGGATTCGTAGTTTGAGCTCACCATATATTT  
ACAGTAGATAGATGTAGATACCCGAGCTTACTTCACTTCAGCAACTATAATTATT  
GCGGTTCCAACCTGGGATTAAGTCTTTAGATGACTAGCCACCTTTCATGGAACCT  
CAAATTTTAAATAGACCAGTAACCCTGTGAGCTTTAGGTTTTGTATTTTTATTTAC  
AGTAGGAGGATTAACAGGGGTAATTTTAGCTAATTCTTCAATTGATATTATTCTTC  
ACGATACTTACTATGTAGTAGCTCATTTTTCACTATGTTCTTTCTATAGGAGCTGTA  
TTTGCAATTATAGCCGGAATTGTCCAATGATTCCCATTATTTACCGGACTAACCT  
TAAATAATTTTTTTTTAAAAACCCAATTTATTACTATATTTTTAGGTGTAAATTTAAC  
ATTTTTTCCCAACACTTTTTAGGGCTAAGAGGAATGCCTCGGCGATATTCCGGAT  
TATCCAGATGCTTTCACTATCTGAAATGCCATTTTCATCTATTGGTTCCATTATTTT  
TCTCACAAGAATTATCTTTTTTTTTATTTATCTTATGAGAAAGGCTTTCTTCCCAAC  
GTAATCTTTGAGAACTTTAAATGTAACAACCTTCAATTGAATGGTTCAAGCCCTAC  
CCCCTAGTG

TOL1\_1

ATTATTAGACAAGAAAGGGGGGAAAAAAGAAGCTTTTGGACCTTAGGAATAATTTA  
TGCCATGATAGCTATCGGATTATTAGGATTCGTAGTTTGAGCTCACCATATATTT  
ACAGTAGATAGATGTAGATACCCGAGCTTACTTCACTTCAGCAACTATAATTATT  
GCGGTTCCAACCTGGGATTAAGTCTTTAGATGACTAGCCACCTTTCATGGAACCT  
CAAATTTTAAATAGACCAGTAACCCTGTGAGCTTTAGGTTTTGTATTTTTATTTAC  
AGTAGGAGGATTAACAGGGGTAATTTTAGCTAATTCTTCAATTGATATTATTCTTC  
ACGATACTTACTATGTAGTAGCTCATTTTTCACTATGTTCTTTCTATAGGAGCTGTA  
TTTGCAATTATAGCCGGAATTGTCCAATGATTCCCATTATTTACCGGACTAACCT  
TAAATAATTTTTTTTTAAAAACCCAATTTATTACTATATTTTTAGGTGTAAATTTAAC  
ATTTTTTCCCAACACTTTTTAGGGCTAAGAGGAATGCCTCGGCGATATTCCGGAT  
TATCCAGATGCTTTCACTATCTGAAATGCCATTTTCATCTATTGGTTCCATTATTTT

TCTCACAAGAATTATCTTTTTTTTTATTTATCTTATGAGAAAGGCTTTCTTCCCAAC  
GTAATCTTTGAGAACTTTAAATGTAACAACCTTCAATTGAATGGTTCAAGCCCTAC  
CCCCTAGTG

TOL5

ATTATTAGACAAGAAAGGGGGGAAAAAAGAAGCTTTTGGACCTTAGGAATAATTTA  
TGCCATGATAGCTATCGGATTATTAGGATTCGTAGTTTGAGCTCACCATATATTT  
ACAGTAGATAGATGTAGATACCCGAGCTTACTTCACTTCAGCAACTATAATTATT  
GCGGTTCCAACCTGGGATTAAGTCTTTAGATGACTAGCCACCTTTTCATGGAACCT  
CAAATTTTAAATAGACCAGTAACCCTGTGAGCTTTAGGTTTTGTATTTTTATTTAC  
AGTAGGAGGATTAACAGGGGTAATTTAGCTAATTCTTCAATTGATATTATTCTTC  
ACGATACTTACTATGTAGTAGCTCATTTTCACTATGTTCTTTCTATAGGAGCTGTA  
TTTGCAATTATAGCCGGAATTGTCCAATGATTCCCATTATTTACCGGACTAACCT  
TAAATAATTTTTTTTTTAAAAACCCAATTTATTACTATATTTTTAGGTGTAAATTTAAC  
ATTTTTTCCCAACACTTTTTAGGGCTAAGAGGAATGCCTCGGCGATATTCGGAT  
TATCCAGATGCTTTCACTATCTGAAATGCCATTTTCATCTATTGGTTCCATTATTTCT  
TCTCACAAGAATTATCTTTTTTTTTATTTATCTTATGAGAAAGGCTTTCTTCCCAAC  
GTAATCTTTGAGAACTTTAAATGTAACAACCTTCAATTGAATGGTTCAAGCCCTAC  
CCCCTAGTG

VIC10

ATTATTAGACAAGAAAGGGGGGAAAAAAGAAGCTTTTGGACCTTAGGAATAATTTA  
TGCCATGATAGCTATCGGATTATTAGGATTCGTAGTTTGAGCTCACCATATATTT  
ACAGTAGATAGATGTAGATACCCGAGCTTACTTCACTTCAGCAACTATAATTATT  
GCGGTTCCAACCTGGGATTAAGTCTTTAGATGACTAGCCACCTTTTCATGGAACCT  
CAAATTTTAAATAGACCAGTAACCCTGTGAGCTTTAGGTTTTGTATTTTTATTTAC  
AGTAGGAGGATTAACAGGGGTAATTTAGCTAATTCTTCAATTGATATTATTCTTC  
ACGATACTTACTATGTAGTAGCTCATTTTCACTATGTTCTTTCTATAGGAGCTGTA  
TTTGCAATTATAGCCGGAATTGTCCAATGATTCCCATTATTTACCGGACTAACCT  
TAAATAATTTTTTTTTTAAAAACCCAATTTATTACTATATTTTTAGGTGTAAATTTAAC  
ATTTTTTCCCAACACTTTTTAGGGCTAAGAGGAATGCCTCGGCGATATTCGGAT  
TATCCAGATGCTTTCACTATCTGAAATGCCATTTTCATCTATTGGTTCCATTATTTCT  
TCTCACAAGAATTATCTTTTTTTTTATTTATCTTATGAGAAAGGCTTTCTTCCCAAC  
GTAATCTTTGAGAACTTTAAATGTAACAACCTTCAATTGAATGGTTCAAGCCCTAC  
CCCCTAGTG

XAN4

ATTATTAGACAAGAAAGGGGGGAAAAAAGAAGCTTTTGGACCTTAGGAATAATTTA  
TGCCATGATAGCTATCGGATTATTAGGATTCGTAGTTTGAGCTCACCATATATTT  
ACAGTAGATAGATGTAGATACCCGAGCTTACTTCACTTCAGCAACTATAATTATC  
GCGGTTCCAACCTGGGATTAAGTCTTTAGGTGACTAGCCACCTTTTCATGGAACCT  
CAAATTTTAAATAGACCAGTAACCCTGTGAGCTTTAGGTTTTGTATTTTTATTTAC  
AGTAGGAGGATTAACAGGGGTAATTTAGCTAATTCTTCAATTGATATTATTCTTC  
ACGATACTTACTATGTAGTAGCTCATTTTCACTATGTTCTTTCTATAGGAGCTGTA  
TTTGCAATTATAGCCGGAATTGTCCAATGATTCCCATTATTTACTGGACTAACCTT  
AAATAATTTTTTTTTTAAAAACCCAATTTATTACTATATTTTTAGGTGTAAATTTAAC  
TTTTTTCCTCAACACTTTTTAGGGCTAAGAGGAATGCCTCGGCGATATTCGGATT  
ATCCAGATGCTTTTCGCTATCTGAAATGCCATTTTCATCTATTGGTTCCATTATTTCT  
CTCACAAGAATTATCTTTTTTTTTATTTATCTTATGAGAAAGGCTTTCTTCCCAACG  
TAAATCTTTGAGAACTTTAAATGTAACAACCTTCAATTGAATGGTTCAAGCCCTACC  
CCCTAGTG

XAX2

ATTATTAGACAAGAAAGGGGGGAAAAAAGAAGCTTTTGGACCTTAGGAATAATTTA

TGCCATGATAGCTATCGGATTATTAGGATTCGTAGTTTGAGCTCACCATATATTT  
ACAGTAGATAGATGTAGATACCCGAGCTTACTTCACTTCAGCAACTATAATTATT  
GCGGTTCCAACACTGGGATTAAGTCTTTAGATGACTAGCCACCTTTCATGGAAC  
CAAATTTTAAATAGACCAGTAACCCTGTGAGCTTTAGGTTTTGTATTTTTATTTAC  
AGTAGGAGGATTAACAGGGGTAATTTAGCTAATTCTTCAATTGATATTATTCTTC  
ACGATACTTACTATGTAGTAGCTCATTTTCACTATGTTCTTTCTATAGGAGCTGTA  
TTTGCAATTATAGCCGGAATTGTCCAATGATTCCCATTATTTACCGGACTAACCT  
TAAATAATTTTTTTTTTAAAAACCCAATTTATTACTATATTTTTAGGTGTAAATTTAAC  
ATTTTTTCCCAACACTTTTTAGGGCTAAGAGGAATGCCTCGGCGATATTCGGAT  
TATCCAGATGCTTTCCTATCTGAAATGCCATTTTCACTATTGGTTCCATTATTTCTC  
TCTCACAAGAATTATCTTTTTTTTTATTTATCTTATGAGAAAGGCTTTCTTCCCAAC  
GTAATCTTTGAGAACTTTAAATGTAACAACCTTCAATTGAATGGTTCAAGCCCTAC  
CCCTAGTG

MEX\_SFP

ATTATTAGACAAGAAAGGGGGGAAAAAAGAAGCTTTTGGACCTTAGGAATAATTTA  
TGCCATAATAGCTATCGGATTATTAGGATTCGTAGTTTGAGCTCACCATATATTTA  
CAGTAGATAGATGTAGATACCCGAGCTTACTTCACTTCAGCAACTATAATTATTG  
CGGTTCCAACACTGGGATTAAGTCTTTAGATGACTAGCCACCTTTCATGGAAC  
AATTTTAAATAGACCAGTAACCCTGTGAGCTTTAGGTTTTGTATTTTTATTTACAG  
TAGGAGGATTAACAGGGGTAATTTAGCTAATTCTTCAATTGATATTATTCTTCAC  
GATACTTACTATGTAGTAGCTCATTTTCACTATGTTCTTTCTATAGGAGCTGTATT  
TGCAATTATAGCCGGAATTGTCCAATGATTCCCATTATTTACTGGACTAACCTTA  
AATAATTTTTTTTTTAAAAACCCAATTTATTACTATATTTTTAGGTGTAAATTTAACAT  
TTTTTCCTCAACACTTTTTAGGGCTAAGAGGAATGCCTCGGCGATATTCGGATTA  
TCCAGATGCTTTCCTATCTGAAATGCCATTTTCACTATTGGTTCCATTATTTCTC  
TCACAAGAATTATCTTTTTTTTTATTTATCTTATGAGAAAGGCTTTCTTCCCAACGT  
AAATCTTTGAGAACTTTAAATGTAACAACCTTCAATTGAATGGTTCAAGCCCTACC  
CCCTAGTG

MEX\_COE\_2

ATTATTAGACAAGAAAGGGGGGAAAAAAGAACCTTTTGGACCTTAGGAATAATTTA  
TGCCATAATAGCTATCGGATTATTAGGATTCGTAGTTTGAGCTCACCATATATTTA  
CAGTAGATAGATGTAGATACCCGAGCTTACTTCACTTCAGCAACTATAATTATTG  
CGGTTCCAACACTGGGATTAAGTCTTTAGATGACTAGCCACCTTTCATGGAAC  
AATTTTAAATAGACCAGTAACCCTGTGAGCTTTAGGTTTTGTATTTTTATTTACAG  
TAGGAGGATTAACAGGGGTAATTTAGCTAATTCTTCAATTGATATTATTCTTCAC  
GATACTTACTATGTAGTAGCTCATTTTCACTATGTTCTTTCTATAGGAGCTGTATT  
TGCAATTATAGCCGGAATTGTCCAATGATTCCCATTATTTACTGGACTAACCTTA  
AATAATTTTTTTTTTAAAAACCCAATTTATTACTATATTTTTAGGTGTAAATTTAACAT  
TTTTTCCTCAACACTTTTTAGGGCTAAGAGGAATGCCTCGGCGATATTCGGATTA  
TCCAGATGCTTTCCTATCTGAAATGCCATTTTCACTATTGGTTCCATTATTTCTC  
TCACAAGAATTATCTTTTTTTTTATTTATCTTATGAGAAAGGCTTTCTTCCCAACGT  
AAATCTTTGAGAACTTTAAATGTAACAACCTTCAATTGAATGGTTCAAGCCCTACC  
CCCTAGTG

MEX\_SAG\_5

ATTATTAGACAAGAAAGGGGGGAAAAAAGAAGCTTTTGGACCTTAGGAATAATTTA  
TGCCATAATAGCTATCGGATTATTAGGATTCGTAGTTTGAGCTCACCATATATTTA  
CAGTAGATAGATGTAGATACCCGAGCTTACTTCACTTCAGCAACTATAATTATTG  
CGGTTCCAACACTGGGATTAAGTCTTTAGATGACTAGCCACCTTTCATGGAAC  
AATTTTAAATAGACCAGTAACCCTGTGAGCTTTAGGTTTTGTATTTTTATTTACAG  
TAGGAGGATTAACAGGGGTAATTTAGCTAATTCTTCAATTGATATTATTCTTCAC

GATACTTACTATGTAGTAGCTCATTTTTCACTATGTTCTTTCTATAGGAGCTGTATT  
TGCAATTATAGCCGGAATTGTCCAATGATTCCCATTATTTACTGGGCTAACCTTA  
ATAAATTTTTTTTTAAAAACCCAATTTATTACTATATTTTTAGGTGTAAATTTAACAT  
TTTTTCCTCAACACTTTTTAGGGCTAAGAGGAATGCCTCGGCGATATTCGGATTA  
TCCAGATGCTTTCACTATCTGAAATGCCATTTTCATCTATTGGTTCCATTATTTCTC  
TCACAAGAATTATCTTTTTTTTTATTTATCTTATGAGAAAGGCTTTCTTCCCAACGT  
AAATCTTTGAGAACTTTAAATGTAACAACCTTCAATTGAATGGTTCAAGCCCTACC  
CCCTAGTG

MEX\_SCA

ATTATTAGACAAGAAAGGGGGAAAAAAGAAGCTTTTGGACCTTAGGAATAATTTA  
TGCCATAATAGCTATCGGATTATTAGGATTTCGTAGTTTGAGCTCACCATATATTTA  
CAGTAGATAGATGTAGATACCCGAGCTTACTTCACTTCAGCACCTATGATTATTG  
CGGTTCCAACCTGGGATTAAGTCTTTAGATGACTAGCCACCTTTTCATGGAACCTCA  
AATTTTAAATAGACCAGTAACCCTGTGAGCTTTAGGTTTTGTATTTTTATTTACAG  
TAGGAGGATTAACAGGGGGTAATTTTAGCTAATTCTTCAATTGATATTATTCTTCAC  
GATACTTACTATGTAGTAGCTCATTTTTCACTATGTTCTTTCTATAGGAGCTGTATT  
TGCAATTATAGCCGGAATTGTCCAATGATTCCCATTATTTACTGGACTAACCTTA  
ATAAATTTTTTTTTAAAAACCCAATTTATTACTATATTTTTAGGTGTAAATTTAACAT  
TTTTTCCTCAACACTTTTTAGGGCTAAGAGGAATGCCTCGGCGATATTCGGATTA  
TCCAGATGCTTTCACTATCTGAAATGCCATTTTCATCTATTGGTTCCATTATTTCTC  
TCACAAGAATTATCTTTTTTTTTATTTATCTTATGAGAAAGGCTTTCTTCCCAACGT  
AAATCTTTGAGAACTTTAAATGTAACAACCTTCAATTGAATGGTTCAAGCCCTACC  
CCCTAGTG

MEX\_SJS\_2

ATTATTAGACAAGAAAGGGGGAAAAAAGAACCTTTTGGACCTTAGGAATAATTTA  
TGCCATAATAGCTATCGGATTATTAGGATTTCGTAGTTTGAGCTCACCATATATTTA  
CAGTAGATAGATGTAGATACCCGAGCTTACTTCACTTCAGCAACTATAATTATTG  
CGGTTCCAACCTGGAATTAAGTCTTTAGATGACTAGCCACCTTTTCATGGAACCTCA  
AATTTTAAATAGACCAGTAACCCTGTGAGCTTTAGGTTTTGTATTTTTATTTACAG  
TAGGAGGATTAACAGGGGGTAATTTTAGCTAATTCTTCAATTGATATTATTCTTCAC  
GATACTTACTATGTAGTAGCTCATTTTTCACTATGTTCTTTCTATAGGAGCTGTATT  
TGCAATTATAGCCGGAATTGTCCAATGATTCCCATTATTTACTGGACTAACCTTA  
ATAAATTTTTTTTTAAAAACCCAATTTATTACTATATTTTTAGGTGTAAATTTAACAT  
TTTTTCCTCAACACTTTTTAGGGCTAAGAGGAATGCCTCGGCGATATTCGGATTA  
TCCAGATGCTTTCACTATCTGAAATGCCATTTTCATCTATTGGTTCCATTATTTCTC  
TCACAAGAATTATCTTTTTTTTTATTTATCTTATGAGAAAGGCTTTCTTCCCAACGT  
AAATCTTTGAGAACTTTAAATGTAACAACCTTCAATTGAATGGTTCAAGCCCTACC  
CCCTAGTG

MEX\_STO

ATTATTAGACAAGAAAGGGGGAAAAAAGAACCTTTTGGACCTTAGGAATAATTTA  
TGCCATAATAGCTATCGGATTATTAGGATTTCGTAGTTTGAGCTCACCATATATTTA  
CAGTAGATAGATGTAGATACCCGAGCTTACTTCACTTCAGCAACTATAATTATTG  
CGGTTCCAACCTGGGATTAAGTCTTTAGATGACTAGCCACCTTTTCATGGAACCTCA  
AATTTTAAATAGACCAGTAACCCTGTGAGCTTTAGGTTTTGTATTTTTATTTACAG  
TAGGAGGATTAACAGGGGGTAATTTTAGCTAATTCTTCAATTGATATTATTCTTCAC  
GATACTTACTATGTAGTAGCTCATTTTTCACTATGTTCTTTCTATAGGAGCTGTATT  
TGCAATTATAGCCGGAATTGTCCAATGATTCCCATTATTTACTGGACTAACCTTA  
ATAAATTTTTTTTTAAAAACCCAATTTATTACTATATTTTTAGGTGTAAATTTAACAT  
TTTTTCCTCAACACTTTTTAGGGCTAAGAGGAATGCCTCGGCGATATTCGGATTA  
TCCAGATGCTTTCACTATCTGAAATGCCATTTTCATCTATTGGTTCCATTATTTCTC

TCACAAGAATTATCTTTTTTTTTATTTATCTTATGAGAAAGGCTTTCTTCCCAACGT  
AAATCTTTGAGAACTTTAAATGTAACAACCTTCAATTGAATGGTTCAAGCCCTACC  
CCCTAGTG

MEX\_TLA\_1

ATTATTAGACAAGAAAGGGGGGAAAAAAGAAGCTTTTGGACCTTAGGAATAATTTA  
TGCCATAATAGCTATCGGATTATTAGGATTTCGTAGTTTGAGCTCACCATATATTTA  
CAGTAGATAGATGTAGATACCCGAGCTTACTTCACTTCAGCACCTATGATTATTG  
CGGTTCCAACCTGGGATTAAGTCTTTAGATGACTAGCCACCTTTTCATGGAACCTCA  
AATTTTAAATAGACCAGTAACCCTGTGAGCTTTAGGTTTTGTATTTTTATTTACAG  
TAGGAGGATTAACAGGGGTAAATTTAGCTAATTCTTCAATTGATATTATTCTTCAC  
GATACTTACTATGTAGTAGCTCATTTTCACTATGTTCTTTCTATAGGAGCTGTATT  
TGCAATTATAGCCGGAATTGTCCAATGATTCCCATTATTTACTGGACTAACCTTA  
ATAAATTTTTTTTTAAAAACCCAATTTATTACTATATTTTTAGGTGTAAATTTAACAT  
TTTTTCCTCAACACTTTTTAGGGCTAAGAGGAATGCCTCGGCGATATTCGGATTA  
TCCAGATGCTTTCACTATCTGAAATGCCATTTTCATCTATTGGTTCCATTATTTCTC  
TCACAAGAATTATCTTTTTTTTTATTTATCTTATGAGAAAGGCTTTCTTCCCAACGT  
AAATCTTTGAGAACTTTAAATGTAACAACCTTCAATTGAATGGTTCAAGCCCTACC  
CCCTAGTG

MEX\_MAL\_1

ATTATTAGACAAGAAAGGGGGGAAAAAAGAAGCTTTTGGACCTTAGGAATAATTTA  
TGCCATAATAGCTATCGGATTATTAGGATTTCGTAGTTTGAGCTCACCATATATTTA  
CAGTAGATAGATGTAGATACCCGAGCTTACTTCACTTCAGCAACTATAATTATTG  
CGGTTCCAACCTGGGATTAAGTCTTTAGATGACTAGCCACCTTTTCATGGAACCTCA  
AATTTTAAATAGACCAGTAACCCTGTGAGCTTTAGGTTTTGTATTTTTATTTACAG  
TAGGAGGATTAACAGGGGTAAATTTAGCTAATTCTTCAATTGATATTATTCTTCAC  
GATACTTACTATGTAGTAGCTCATTTTCACTATGTTCTTTCTATAGGAGCTGTATT  
TGCAATTATAGCCGGAATTGTCCAATGATTCCCATTATTTACTGGACTAACCTTA  
ATAAATTTTTTTTTAAAAACCCAATTTATTACTATATTTTTAGGTGTAAATTTAACAT  
TTTTTCCTCAACACTTTTTAGGGCTAAGAGGAATGCCTCGGCGATATTCGGATTA  
TCCAGATGCTTTCACTATCTGAAATGCCATTTTCATCTATTGGTTCCATTATTTCTC  
TCACAAGAATTATCTTTTTTTTTATTTATCTTATGAGAAAGGCTTTCTTCCCAACGT  
AAATCTTTGAGAACTTTAAATGTAACAACCTTCAATTGAATGGTTCAAGCCCTACC  
CCCTAGTG

MEX\_MAL\_2

ATTATTAGACAAGAAAGGGGGGAAAAAAGAAGCTTTTGGACCTTAGGAATAATTTA  
TGCCATAATAGCTATGGGATTATTAGGATTTCGTCTGTTTGAGCTCACCATATATTT  
ACAGTAGATAGATGTAGATACCCGAGCTTACTTCACTTCAGCAACTATAATTATT  
GCGGTTCCAACCTGGGATTAAGTCTTTAGATGACTAGCCACCTTTTCATGGAACCT  
CAAATTTTAAATAGACCAGTAACCCTGTGAGCTTTAGGTTTTGTATTTTTATTTAC  
AGTAGGAGGATTAACAGGGGTAAATTTAGCTAATTCTTCAATTGATATTATTCTTC  
ACGATACTTACTATGTAGTAGCTCATTTTCACTATGTTCTTTCTATAGGAGCTGTA  
TTTGCAATTATAGCCGGAATTGTCCAATGATTCCCATTATTTACTGGACTAACCTT  
AAATAATTTTTTTTTAAAAACCCAATTTATTACTATATTTTTAGGTGTAAATTTAAC  
TTTTTCCTCAACACTTTTTAGGGCTAAGAGGAATGCCTCGGCGATATTCGGATT  
ATCCAGATGCTTTCACTATCTGAAATGCCATTTTCATCCATTGGTTCCATTATTTCT  
CTCACAAGAATTATCTTTTTTTTTATTTATCCTATGAGAAAGGCTTTCTTCCCAACG  
TAAATCTTTGAGAACTTTAAATGTAACAACCTTCAATTGAATGGTTCAAGCCCTACC  
CCCTAGTG

MEX\_OCU\_1

ATTATTAGACAAGAAAGGGGGGAAAAAAGAAGCTTTTGGACCTTAGGAATAATTTA

TGCCATAATAGCTATCGGATTATTAGGATTTCGTAGTTTGAGCTCACCATATATTTA  
CAGTAGATAGATGTAGATACCCGAGCTTACTTCACTTCAGCAACTATAATTATTG  
CGGTTCCAACCTGGGATTAAGTCTTTAGATGACTAGCCACCTTTTCATGGAACCTCA  
AATTTTAAATAGACCAGTAACCCTGTGAGCTTTAGGTTTTGTATTTTTATTTACAG  
TAGGAGGATTAACAGGGGTAATTTTAGCTAATTCTTCAATTGATATTATTCTTCAC  
GATACTTACTATGTAGTAGCTCATTTTCACTATGTTCTTTCTATAGGAGCTGTATT  
TGCAATTATAGCCGGAATTGTCCAATGATTCCCATTATTTACTGGACTAACCTTA  
AATAATTTTTTTTTTAAAAACCCAATTTATTACTATATTTTTAGGTGTAAATTTAACAT  
TTTTTCCTCAACACTTTTTAGGGCTAAGAGGAATGCCTCGGCGATATTCGGATTA  
TCCAGATGCTTTCACTATCTGAAATGCCATTTTCATCTATTGGTTCCATTATTTCTC  
TCACAAGAATTATCTTTTTTTTTATTTATCTTATGAGAAAGGCTTTCTTCCCAACGT  
AAATCTTTGAGAACCTTTAAATGTAACAACCTTCAATTGAATGGTTCAAGCCCTACC  
CCCTAGTG

MEX\_OCU\_2

ATTATTAGACAAGAAAGGGGGGAAAAAAGAAGCTTTTGGACCTTAGGAATAATTTA  
TGCCATAATAGCTATCGGATTATTAGGATTTCGTAGTTTGAGCTCACCATATATTTA  
CAGTAGATAGATGTAGATACCCGAGCTTACTTCACTTCAGCAACTATAATTATTG  
CGGTTCCAACCTGGGATTAAGTCTTTAGATGACTAGCCACCTTTTCATGGAACCTCA  
AATTTTAAATAGACCAGTAACCCTGTGAGCTTTAGGTTTTGTATTTTTATTTACAG  
TAGGAGGATTAACAGGGGTAATTTTAGCTAATTCTTCAATTGATATTATTCTTCAC  
GATACTTACTATGTAGTAGCTCATTTTCACTATGTTCTTTCTATAGGAGCTGTATT  
TGCAATTATAGCCGGAATTGTCCAATGATTCCCATTATTTACTGGACTAACCTTA  
AATAATTTTTTTTTTAAAAACCCAATTTATTACTATATTTTTAGGTGTAAATTTAACAT  
TTTTTCCTCAACACTTTTTAGGGCTAAGAGGAATGCCTCGGCGATATTCGGATTA  
TCCAGATGCTTTCACTATCTGAAATGCCATTTTCATCTATTGGTTCCATTATTTCTC  
TCACAAGAATTATCTTTTTTTTTATTTATCTTATGAGAAAGGCTTTCTTCCCAACGT  
AAATCTTTGAGAACCTTTAAATGTAACAACCTTCAATTGAATGGTTCAAGCCCTACC  
CCCTAGTG

MEX\_SAG\_1

ATTATTAGACAAGAAAGGGGGGAAAAAAGAAGCTTTTGGACCTTAGGAATAATTTA  
TGCCATAATAGCTATCGGATTATTAGGATTTCGTAGTTTGAGCTCACCATATATTTA  
CAGTAGATAGATGTAGATACCCGAGCTTACTTCACTTCAGCAACTATAATTATTG  
CGGTTCCAACCTGGGATTAAGTCTTTAGATGACTAGCCACCTTTTCATGGAACCTCA  
AATTTTAAATAGACCAGTAACCCTGTGAGCTTTAGGTTTTGTATTTTTATTTACAG  
TAGGAGGATTAACAGGGGTAATTTTAGCTAATTCTTCAATTGATATTATTCTTCAC  
GATACTTACTATGTAGTAGCTCATTTTCACTATGTTCTTTCTATAGGAGCTGTATT  
TGCAATTATAGCCGGAATTGTCCAATGATTCCCATTATTTACTGGGCTAACCTTA  
AATAATTTTTTTTTTAAAAACCCAATTTATTACTATATTTTTAGGTGTAAATTTAACAT  
TTTTTCCTCAACACTTTTTAGGGCTAAGAGGAATGCCTCGGCGATATTCGGATTA  
TCCAGATGCTTTCACTATCTGAAATGCCATTTTCATCTATTGGTTCCATTATTTCTC  
TCACAAGAATTATCTTTTTTTTTATTTATCTTATGAGAAAGGCTTTCTTCCCAACGT  
AAATCTTTGAGAACCTTTAAATGTAACAACCTTCAATTGAATGGTTCAAGCCCTACC  
CCCTAGTG

MEX\_SAG\_2

ATTATTAGACAAGAAAGGGGGGAAAAAAGAAGCTTTTGGACCTTAGGAATAATTTA  
TGCCATAATAGCTATCGGATTATTAGGATTTCGTAGTTTGAGCTCACCATATATTTA  
CAGTAGATAGATGTAGATACCCGAGCTTACTTCACTTCAGCAACTATAATTATTG  
CGGTTCCAACCTGGGATTAAGTCTTTAGATGACTAGCCACCTTTTCATGGAACCTCA  
AATTTTAAATAGACCAGTAACCCTGTGAGCTTTAGGTTTTGTATTTTTATTTACAG  
TAGGAGGATTAACAGGGGTAATTTTAGCTAATTCTTCAATTGATATTATTCTTCAC

GATACTTACTATGTAGTAGCTCATTTTTCACTATGTTCTTTCTATAGGAGCTGTATT  
TGCAATTATAGCCGGAATTGTCCAATGATTCCCATTATTTACTGGGCTAACCTTA  
ATAAATTTTTTTTTAAAAACCCAATTTATTACTATATTTTTAGGTGTAAATTTAACAT  
TTTTTCCTCAACACTTTTTAGGGCTAAGAGGAATGCCTCGGCGATATTCGGATTA  
TCCAGATGCTTTCACTATCTGAAATGCCATTTTCATCTATTGGTTCCATTATTTCTC  
TCACAAGAATTATCTTTTTTTTTATTTATCTTATGAGAAAGGCTTTCTTCCCAACGT  
AAATCTTTGAGAACTTTAAATGTAACAACCTTCAATTGAATGGTTCAAGCCCTACC  
CCCTAGTG

MEX\_SJC\_1

ATTATTAGACAAGAAAGGGGGAAAAAAGAAGCTTTTGGACCTTAGGAATAATTTA  
TGCCATAATAGCTATCGGATTATTAGGATTTCGTAGTTTGAGCTCACCATATATTTA  
CAGTAGATAGATGTAGATACCCGAGCTTACTTCACTTCAGCAACTATAATTATTG  
CGGTTCCAACCTGGGATTAAGTCTTTAGATGACTAGCCACCTTTTCATGGAACCTCA  
AATTTTAAATAGACCAGTAACCCTGTGAGCTTTAGGTTTTGTATTTTTATTTACAG  
TAGGAGGATTAACAGGGGGTAATTTTAGCTAATTCTTCAATTGATATTATTCTTCAC  
GATACTTACTATGTAGTAGCTCATTTTTCACTATGTTCTTTCTATAGGAGCTGTATT  
TGCAATTATAGCCGGAATTGTCCAATGATTCCCATTATTTACTGGACTAACCTTA  
ATAAATTTTTTTTTAAAAACCCAATTTATTACTATATTTTTAGGTGTAAATTTAACAT  
TTTTTCCTCAACACTTTTTAGGGCTAAGAGGAATGCCTCGGCGATATTCGGATTA  
TCCAGATGCTTTCACTATCTGAAATGCCATTTTCATCTATTGGTTCCATTATTTCTC  
TCACAAGAATTATCTTTTTTTTTATTTATCTTATGAGAAAGGCTTTCTTCCCAACGT  
AAATCTTTGAGAACTTTAAATGTAACAACCTTCAATTGAATGATTCAAGCCCTACCC  
CCTAGTG

MEX\_SJC\_2

ATTATTAGACAAGAAAGGGGGAAAAAAGAAGCTTTTGGACCTTAGGAATAATTTA  
TGCCATAATAGCTATCGGATTATTAGGATTTCGTAGTTTGAGCTCACCATATATTTA  
CAGTAGATAGATGTAGATACCCGAGCTTACTTCACTTCAGCAACTATAATTATTG  
CGGTTCCAACCTGGGATTAAGTCTTTAGATGACTAGCCACCTTTTCATGGAACCTCA  
AATTTTAAATAGACCAGTAACCCTGTGAGCTTTAGGTTTTGTATTTTTATTTACAG  
TAGGAGGATTAACAGGGGGTAATTTTAGCTAATTCTTCAATTGATATTATTCTTCAC  
GATACTTACTATGTAGTAGCTCATTTTTCACTATGTTCTTTCTATAGGAGCTGTATT  
TGCAATTATAGCCGGAATTGTCCAATGATTCCCATTATTTACTGGACTAACCTTA  
ATAAATTTTTTTTTAAAAACCCAATTTATTACTATATTTTTAGGTGTAAATTTAACAT  
TTTTTCCTCAACACTTTTTAGGGCTAAGAGGAATGCCTCGGCGATATTCGGATTA  
TCCAGATGCTTTCACTATCTGAAATGCCATTTTCATCTATTGGTTCCATTATTTCTC  
TCACAAGAATTATCTTTTTTTTTATTTATCTTATGAGAAAGGCTTTCTTCCCAACGT  
AAATCTTTGAGAACTTTAAATGTAACAACCTTCAATTGAATGGTTCAAGCCCTACC  
CCCTAGTG

MEX\_SJC\_3

ATTATTAGACAAGAAAGGGGGAAAAAAGAAGCTTTTGGACCTTAGGAATAATTTA  
TGCCATAATAGCTATCGGATTATTAGGATTTCGTAGTTTGAGCTCACCATATATTTA  
CAGTAGATAGATGTAGATACCCGAGCTTACTTCACTTCAGCAACTATAATTATTG  
CGGTTCCAACCTGGGATTAAGTCTTTAGATGACTAGCCACCTTTTCATGGAACCTCA  
AATTTTAAATAGACCAGTAACCCTGTGAGCTTTAGGTTTTGTATTTTTATTTACAG  
TAGGAGGATTAACAGGGGGTAATTTTAGCTAATTCTTCAATTGATATTATTCTTCAC  
GATACTTACTATGTAGTAGCTCATTTTTCACTATGTTCTTTCTATAGGAGCTGTATT  
TGCAATTATAGCCGGAATTGTCCAATGATTCCCATTATTTACTGGACTAACCTTA  
ATAAATTTTTTTTTAAAAACCCAATTTATTACTATATTTTTAGGTGTAAATTTAACAT  
TTTTTCCTCAACACTTTTTAGGGCTAAGAGGAATGCCTCGGCGATATTCGGATTA  
TCCAGATGCTTTCACTATCTGAAATGCCATTTTCATCTATTGGTTCCATTATTTCTC



TCACAAGAATTATCTTTTTTTTTATTTATCTTATGAGAAAGGCTTTCTTCCCAACGT  
AAATCTTTGAGAACTTTAAATGTAACAACCTTCAATTGAATGGTTCAAGCCCTACC  
CCCTAGTG

MEX\_SJS

ATTATTAGACAAGAAAGGGGGGAAAAAAGAACCTTTTGGACCTTAGGAATAATTTA  
TGCCATAATAGCTATCGGATTATTAGGATTTCGTAGTTTGAGCTCACCATATATTTA  
CAGTAGATAGATGTAGATACCCGAGCTTACTTCACTTCAGCAACTATAATTATTG  
CGGTTCCAACCTGGAATTAAGTCTTTAGATGACTAGCCACCTTTTCATGGAACCTCA  
AATTTTAAATAGACCAGTAACCCTGTGAGCTTTAGGTTTTGTATTTTTATTTACAG  
TAGGAGGATTAACAGGGGTAAATTTAGCTAATTCTTCAATTGATATTATTCTTCAC  
GATACTTACTATGTAGTAGCTCATTTTCACTATGTTCTTTCTATAGGAGCTGTATT  
TGCAATTATAGCCGGAATTGTCCAATGATTCCCATTATTTACTGGACTAACCTTA  
ATAATTTTTTTTTTAAAAACCCAATTTATTACTATATTTTTAGGTGTAAATTTAACAT  
TTTTCTCAACACTTTTTAGGGCTAAGAGGAATGCCTCGGCGATATTCGGATTA  
TCCAGATGCTTTCACTATCTGAAATGCCATTTTCATCTATTGGTTCCATTATTTCTC  
TCACAAGAATTATCTTTTTTTTTATTTATCTTATGAGAAAGGCTTTCTTCCCAACGT  
AAATCTTTGAGAACTTTAAATGTAACAACCTTCAATTGAATGGTTCAAGCCCTACC  
CCCTAGTG

MEX\_SJS\_1

ATTATTAGACAAGAAAGGGGGGAAAAAAGAAGCTTTTGGACCTTAGGAATAATTTA  
TGCCATAATACCTATCGGATTATTAGGATTTCGTCTGTTTGAGCTCACCATATATTTA  
CAGTAGATAGATGTAGATACCCGAGCTTACTTCACTTCAGCAACTATAATTATTG  
CGGTTCCAACCTGGGATTAAGTCTTTAGATGACTAGCCACCTTTTCATGGAACCTCA  
AATTTTAAATAGACCAGTAACCCTGTGAGCTTTAGGTTTTGTATTTTTATTTACAG  
TAGGAGGATTAACAGGGGTAAATTTAGCTAATTCTTCAATTGATATTATTCTTCAC  
GATACTTACTATGTAGTAGCTCATTTTCACTATGTTCTTTCTATAGGAGCTGTATT  
TGCAATTATAGCCGGAATTATCCAATGATTCCCATTATTTACTGGACTAACCTTAA  
ATAATTTTTTTTTTAAAAACCCAATTTATTACTATATTTTTAGGTGTAAATTTAACATT  
TTTTCTCAACACTTTTTAGGGCTAAGAGGAATGCCTCGGCGATATTCGGATTAT  
CCAGATGCTTTCACTATCTGAAATGCCATTTTCATCCATTGGTTCCATTATTTCTCT  
CACAAGAATTATCTTTTTTTTTATTTATCTTATGAGAAAGGCTTTCTTCCCAACGTA  
AATCTTTGAGAACTTCAAATGTAACAACCTTCAATTGAATGGTGCAAGCCCTACCC  
CCTAGTG

MEX\_SJS\_3

ATTATTAGACAAGAAAGGGGGGAAAAAAGAAGCTTTTGGACCTTAGGAATAATTTA  
TGCCATAATACCTATCGGATTATTAGGATTTCGTCTGTTTGAGCTCACCATATATTTA  
CAGTAGATAGATGTAGATACCCGAGCTTACTTCACTTCAGCAACTATAATTATTG  
CGGTTCCAACCTGGGATTAAGTCTTTAGATGACTAGCCACCTTTTCATGGAACCTCA  
AATTTTAAATAGACCAGTAACCCTGTGAGCTTTAGGTTTTGTATTTTTATTTACAG  
TAGGAGGATTAACAGGGGTAAATTTAGCTAATTCTTCAATTGATATTATTCTTCAC  
GATACTTACTATGTAGTAGCTCATTTTCACTATGTTCTTTCTATAGGAGCTGTATT  
TGCAATTATAGCCGGAATTATCCAATGATTCCCATTATTTACTGGACTAACCTTAA  
ATAATTTTTTTTTTAAAAACCCAATTTATTACTATATTTTTAGGTGTAAATTTAACATT  
TTTTCTCAACACTTTTTAGGGCTAAGAGGAATGCCTCGGCGATATTCGGATTAT  
CCAGATGCTTTCACTATCTGAAATGCCATTTTCATCCATTGGTTCCATTATTTCTCT  
CACAAGAATTATCTTTTTTTTTATTTATCTTATGAGAAAGGCTTTCTTCCCAACGTA  
AATCTTTGAGAACTTCAAATGTAACAACCTTCAATTGAATGGTGCAAGCCCTACCC  
CCTAGTG

MEX\_SPT\_1

ATTATTAGACAAGAAAGGGGGGAAAAAAGAAGCTTTTGGACCTTAGGAATAATTTA

TGCCATAATAGCTATCGGATTATTAGGATTTCGTAGTTTGAGCTCACCATATATTTA  
CAGTAGATAGATGTAGATACCCGAGCTTACTTCACTTCAGCAACTATAATTATTG  
CGGTTCCAACCTGGGATTAAGTCTTTAGATGACTAGCCACCTTTTCATGGAACCTCA  
AATTTTAAATAGACCAGTAACCCTGTGAGCTCTAGGTTTTGTATTTTTATTTACAG  
TAGGAGGATTAACAGGGGTAATTTTAGCTAATTCTTCAATTGATATTATTCTTCAC  
GATACTTACTATGTAGTAGCTCATTTTCACTATGTTCTTTCTATAGGAGCTGTATT  
TGCAATTATAGCCGGAATTGTCCAATGATTCCCATTATTTACTGGACTAACCTTA  
AATAATTTTTTTTTTAAAAACCCAATTTATTACTATATTTTTAGGTGTAAATTTAACAT  
TTTTTCCTCAACACTTTTTAGGGCTAAGAGGAATGCCTCGGCGATATTCGGATTA  
TCCAGATGCTTTCACTATCTGAAATGCCATTTTCATCTATTGGTTCCATTATTTCTC  
TCACAAGAATTATCTTTTTTTTTATTTATCTTATGAGAAAGGCTTTCTTCCCAACGT  
AAATCTTTGAGAACCTTTAAATGTAACAACCTTCAATTGAATGGTTCAAGCCCTACC  
CCCTAGTG

MEX\_SPT\_2

ATTATTAGACAAGAAAGGGGGGAAAAAAGAAGCTTTTGGACCTTAGGAATAATTTA  
TGCCATAATAGCTATCGGATTATTAGGATTTCGTAGTTTGAGCTCACCATATATTTA  
CAGTAGATAGATGTAGATACCCGAGCTTACTTCACTTCAGCAACTATAATTATTG  
CGGTTCCAACCTGGGATTAAGTCTTTAGATGACTAGCCACCTTTTCATGGAACCTCT  
AATTTTAAATAGACCAGTAACCCTATGAGCTTTAGGTTTTGTATTTTTATTTACAG  
TAGGAGGTTTAAACAGGAGTAATTTTAGCTAATTCTTCAATTGATATTATTCTTCAC  
GATACTTACTATGTAGTAGCTCATTTTCACTATGTTCTTTCTATAGGAGCTGTATT  
TGCAATTATAGCCGGAATTGTCCAATGATTCCCATTATTTACTGGACTAACCTTA  
AATAATTTTTTTTTTAAAAACCCAATTTATTACTATATTTTTAGGTGTAAATTTAACAT  
TTTTTCCTCAACACTTTTTAGGGCTAAGAGGAATGCCTCGGCGATATTCGGATTA  
TCCAGATGCTTTCACTATCTGAAATGCCATTTTCATCTATTGGTTCTATTATTTCTC  
TCACAAGAATTATCTTTTTTTTTATTTATCTTATGAGAAAGGCTTTCTTCCCAACGT  
AAATCTTTGAGAACCTTTAAATGTAACAACCTTCAATTGAATGGTTCAAGCCCTACC  
CCCTAGTG

MEX\_SPT\_3

ATTATTAGACAAGAAAGGGGGGAAAAAAGAAGCTTTTGGACCTTAGGAATAATTTA  
TGCCATAATAGCTATCGGATTATTAGGATTTCGTAGTTTGAGCTCACCATATATTTA  
CAGTAGATAGATGTAGATACCCGAGCTTACTTCACTTCAGCAACTATAATTATTG  
CGGTTCCAACCTGGGATTAAGTCTTTAGATGACTAGCCACCTTTTCATGGAACCTCT  
AATTTTAAATAGACCAGTAACCCTATGAGCTTTAGGTTTTGTATTTTTATTTACAG  
TAGGAGGTTTAAACAGGAGTAATTTTAGCTAATTCTTCAATTGATATTATTCTTCAC  
GATACTTACTATGTAGTAGCTCATTTTCACTATGTTCTTTCTATAGGAGCTGTATT  
TGCAATTATAGCCGGAATTGTCCAATGATTCCCATTATTTACTGGACTAACCTTA  
AATAATTTTTTTTTTAAAAACCCAATTTATTACTATATTTTTAGGTGTAAATTTAACAT  
TTTTTCCTCAACACTTTTTAGGGCTAAGAGGAATGCCTCGGCGATATTCGGATTA  
TCCAGATGCTTTCACTATCTGAAATGCCATTTTCATCTATTGGTTCTATTATTTCTC  
TCACAAGAATTATCTTTTTTTTTATTTATCTTATGAGAAAGGCTTTCTTCCCAACGT  
AAATCTTTGAGAACCTTTAAATGTAACAACCTTCAATTGAATGGTTCAAGCCCTACC  
CCCTAGTG

MEX\_TEP

ATTATTAGACAAGAAAGGGGGGAAAAAAGAAGCTTTTGGACCTTAGGAATAATTTA  
TGCCATAATAGCTATCGGATTATTAGGATTTCGTAGTTTGAGCTCACCATATATTTA  
CAGTAGATAGATGTAGATACCCGAGCTTACTTCACTTCAGCAACTATAATTATTG  
CGGTTCCAACCTGGGATTAAGTCTTTAGATGACTAGCCACCTTTTCATGGAACCTCA  
AATTTTAAATAGACCAGTAACCCTGTGAGCTTTAGGTTTTGTATTTTTATTTACAG  
TAGGAGGATTAACAGGGGTAATTTTAGCTAATTCTTCAATTGATATTATTCTTCAC

GATACTTACTATGTAGTAGCTCATTTTTCACTATGTTCTTTCTATAGGAGCTGTATT  
TGCAATTATAGCCGGAATTGTCCAATGATTCCCATTATTTACTGGACTAACCTTA  
ATAAATTTTTTTTTAAAAACCCAATTTATTACTATATTTTTAGGTGTAAATTTAACAT  
TTTTTCCTCAACACTTTTTAGGGCTAAGAGGAATGCCTCGGCGATATTCGGATTA  
TCCAGATGCTTTCACTATCTGAAATGCCATTTTCATCTATTGGTTCCATTATTTCTC  
TCACAAGAATTATCTTTTTTTTTATTTATCTTATGAGAAAGGCTTTCTTCCCAACGT  
AAATCTTTGAGAACTTTAAATGTAACAACCTTCAATTGAATGGTTCAAGCCCTACC  
CCCTAGTG

MEX\_TEP\_1

ATTATTAGACAAGAAAGGGGGAAAAAAGAAGCTTTTGGACCTTAGGAATAATTTA  
TGCCATAATAGCTATCGGATTATTAGGATTTCGTAGTTTGAGCTCACCATATATTTA  
CAGTAGATAGATGTAGATACCCGAGCTTACTTCACTTCAGCAACTATAATTATTG  
CGGTTCCAACCTGGGATTAAGTCTTTAGATGACTAGCCACCTTTTCATGGAACCTCA  
AATTTTAAATAGACCAGTAACCCTGTGAGCTTTAGGTTTTGTATTTTTATTTACAG  
TAGGAGGATTAACAGGGGGTAATTTTAGCTAATTCTTCAATTGATATTATTCTTCAC  
GATACTTACTATGTAGTAGCTCATTTTTCACTATGTTCTTTCTATAGGAGCTGTATT  
TGCAATTATAGCCGGAATTGTCCAATGATTCCCATTATTTACTGGACTAACCTTA  
ATAAATTTTTTTTTAAAAACCCAATTTATTACTATATTTTTAGGTGTAAATTTAACAT  
TTTTTCCTCAACACTTTTTAGGGCTAAGAGGAATGCCTCGGCGATATTCGGATTA  
TCCAGATGCTTTCACTATCTGAAATGCCATTTTCATCTATTGGTTCCATTATTTCTC  
TCACAAGAATTATCTTTTTTTTTATTTATCTTATGAGAAAGGCTTTCTTCCCAACGT  
AAATCTTTGAGAACTTTAAATGTAACAACCTTCAATTGAATGGTTCAAGCCCTACC  
CCCTAGTG

MEX\_TEP\_2

ATTATTAGACAAGAAAGGGGGAAAAAAGAAGCTTTTGGACCTTAGGAATAATTTA  
TGCCATAATAGCTATCGGATTATTAGGATTTCGTAGTTTGAGCTCACCATATATTTA  
CAGTAGATAGATGTAGATACCCGAGCTTACTTCACTTCAGCAACTATAATTATTG  
CGGTTCCAACCTGGGATTAAGTCTTTAGATGACTAGCCACCTTTTCATGGAACCTCA  
AATTTTAAATAGACCAGTAACCCTGTGAGCTTTAGGTTTTGTATTTTTATTTACAG  
TAGGAGGATTAACAGGGGGTAATTTTAGCTAATTCTTCAATTGATATTATTCTTCAC  
GATACTTACTATGTAGTAGCTCATTTTTCACTATGTTCTTTCTATAGGAGCTGTATT  
TGCAATTATAGCCGGAATTGTCCAATGATTTCCATTATTTACTGGACTAACCTTAA  
ATAATTTTTTTTTAAAAACCCAATTTATTACTATATTTTTAGGTGTAAATTTAACATT  
TTTTTCCTCAACACTTTTTAGGGCTAAGAGGAATGCCTCGGCGATATTCGGATTAT  
CCAGATGCTTTCACTATCTGAAATGCCATTTTCATCTATTGGTTCCATTATTTCTCT  
CACAAGAATTATCTTTTTTTTTATTTATCTTATGAGAAAGGCTTTCTTCCCAACGTA  
AATCTTTGAGAACTTTAAATGTAACAACCTTCAATTGAATGGTTCAAGCCCTACCC  
CCTAGTG

MEX\_TLA

ATTATTAGACAAGAAAGGGGGAAAAAAGAAGCTTTTGGACCTTAGGAATAATTTA  
TGCCATAATAGCTATCGGATTATTAGGATTTCGTAGTTTGAGCTCACCATATATTTA  
CAGTAGATAGATGTAGATACCCGAGCTTACTTCACTTCAGCACCTATGATTATTG  
CGGTTCCAACCTGGGATTAAGTCTTTAGATGACTAGCCACCTTTTCATGGAACCTCA  
AATTTTAAATAGACCAGTAACCCTGTGAGCTTTAGGTTTTGTATTTTTATTTACAG  
TAGGAGGATTAACAGGGGGTAATTTTAGCTAATTCTTCAATTGATATTATTCTTCAC  
GATACTTACTATGTAGTAGCTCATTTTTCACTATGTTCTTTCTATAGGAGCTGTATT  
TGCAATTATAGCCGGAATTGTCCAATGATTCCCATTATTTACTGGACTAACCTTA  
ATAAATTTTTTTTTAAAAACCCAATTTATTACTATATTTTTAGGTGTAAATTTAACAT  
TTTTTCCTCAACACTTTTTAGGGCTAAGAGGAATGCCTCGGCGATATTCGGATTA  
TCCAGATGCTTTCACTATCTGAAATGCCATTTTCATCTATTGGTTCCATTATTTCTC

TCACAAGAATTATCTTTTTTTTTATTTATCTTATGAGAAAGGCTTTCTTCCCAACGT  
AAATCTTTGAGAACTTTAAATGTAACAACCTTCAATTGAATGGTTCAAGCCCTACC  
CCCTAGTG

MEX\_TLA\_2

ATTATTAGACAAGAAAGGGGGGAAAAAAGAACCTTTTGGACCTTAGGAATAATTTA  
TCCCTTATTACCTATCGGATTATTAGGATTCGTTCGTTTGAGCTCACCATATCTTTA  
CAGTAGATAGCTGTAGATACCCGAGCTTACTTCACTTCAGCAACTATAATTATTG  
CGGTTCCAACCTGGGATTAAGTCTTTAGATGACTAGCCACCTTTTCATGGAACCTCA  
AATTTTAAATAGACCAGTAACCCTGTGAGCTTTAGGTTTTGTATTTTTATTTACAG  
TAGGAGGATTAACAGGGGTAAATTTAGCTAATTCTTCAATTGATATTATTCTTCAC  
GATACTTACTATGTAGTAGCTCATTTTCACTATGTTCTTTCTATAGGAGCTGTATT  
TGCAATTATAGCCGGAATTAGCCAATGATTCCCATTATTTACTGGACTAACCTTA  
ATAAATTTTTTTTTAAAAACCCAATTTATTACTATATTTTTAGGTGTAAATTTAACAT  
TTTTTCCTCAACACTTTTTAGGGCTAAGAGGAATGCCTCGGCGATATTCGGATTA  
TCCAGATGCTTTCACTACCTGAAATGCCATTTTCATCCATTGGTTCCATTATTTCTC  
TCACAAGAATTATCTTTTTTTTTATTTATCTTATGAGAAAGGCTTTCTTCCCAACGT  
AAATCTTTGAGAACTTCAATGTAACAACCTTCAATTGAATGGTGCAAGCCCTACC  
CCCTAGTG

MEX\_TLA\_3

ATTATTAGACAAGAAAGGGGGGAAAAAAGAAGCTTTTGGACCTTAGGAATAATTTA  
TGCCATAATAGCTATCGGATTATTAGGATTCGTAGTTTGAGCTCACCATATATTTA  
CAGTAGATAGATGTAGATACCCGAGCTTACTTCACTTCAGCAACTATAATTATTG  
CGGTTCCAACCTGGGATTAAGTCTTTAGATGACTAGCCACCTTTTCATGGAACCTCA  
AATTTTAAATAGACCAGTAACCCTGTGAGCTTTAGGTTTTGTATTTTTATTTACAG  
TAGGAGGATTAACAGGGGTAAATTTAGCTAATTCTTCAATTGATATTATTCTTCAC  
GATACTTACTATGTAGTAGCTCATTTTCACTATGTTCTTTCTATAGGAGCTGTATT  
TGCAATTATAGCCGGAATTGTCCAATGATTCCCATTATTTACTGGACTAACCTTA  
ATAAATTTTTTTTTAAAAACCCAATTTATTACTATATTTTTAGGTGTAAATTTAACAT  
TTTTTCCTCAACACTTTTTAGGGCTAAGAGGAATGCCTCGGCGATATTCGGATTA  
TCCAGATGCTTTCACTATCTGAAATGCCATTTTCATCTATTGGTTCCATTATTTCTC  
TCACAAGAATTATCTTTTTTTTTATTTATCTTATGAGAAAGGCTTTCTTCCCAACGT  
AAATCTTTGAGAACTTTAAATGTAACAACCTTCAATTGAATGGTTCAAGCCCTACC  
CCCTAGTG

MEX\_YAU\_1

ATTATTAGACAAGAAAGGGGGGAAAAAAGAAGCTTTTGGACCTTAGGAATAATTTA  
TGCCATGATAGCTATCGGATTATTAGGATTCGTAGTTTGAGCTCACCATATATTT  
ACAGTAGATAGATGTAGATACCCGAGCTTACTTCACTTCAGCAACTATAATTATT  
GCGGTTCCAACCTGGGATTAAGTCTTTAGATGGCTAGCCACCTTTTCATGGAACCT  
CAAATTTTAAATAGACCAGTAACCCTGTGAGCTTTAGGTTTTGTATTTTTATTTAC  
AGTAGGAGGATTAACAGGGGTAAATTTAGCTAATTCTTCAATTGATATTATTCTTC  
ACGATACTTACTATGTAGTAGCTCATTTTCACTATGTTCTTTCTATAGGAGCTGTA  
TTTGCAATTATAGCCGGAATTAGCCAATGATTCCCATTATTTACTGGACTAACCTT  
AAATAATTTTTTTTTAAAAACCCAATTTATTACTATATTTTTAGGTGTAAATTTAACA  
TTTTTCCTCAACACTTTTTAGGGCTAAGAGGAATGCCTCGGCGATATTCGGATT  
ATCCAGATGCTTTCACTATCTGAAATGCCATTTTCATCTATTGGTTCCATTATTTCT  
CTCACAAGAATTATCTTTTTTTTTATTTATCTTATGAGAAAGGCTTTCTTCCCAACG  
TAAATCTTTGAGAACTTTAAATGTAACAACCTTCAATTGAATGGTTCAAGCCCTACC  
CCCTAGTG

MEX\_YAU\_2

ATTATTAGACAAGAAAGGGGGGAAAAAAGAAGCTTTTGGACCTTAGGAATAATTTA

TGCCATAATAGCTATCGGATTATTAGGATTTCGTAGTTTGAGCTCACCATATATTTA  
CAGTAGATAGATGTAGATACCCGAGCTTACTTCACTTCAGCAACTATAATTATTG  
CGGTTCCAACCTGGGATTAAGTCTTTAGATGACTAGCCACCTTTCATGGAACCTCA  
AATTTTAAATAGACCAGTAACCCTGTGAGCTTTAGGTTTTGTATTTTTATTTACAG  
TAGGAGGATTAACAGGGGTAATTTTAGCTAATTCTTCAATTGATATTATTCTTCAC  
GATACTTACTATGTAGTAGCTCATTTTCACTATGTTCTTTCTATAGGAGCTGTATT  
TGCAATTATAGCCGGAATTGTCCAATGATTCCCATTATTTACTGGACTAACCTTA  
AATAATTTTTTTTTTAAAAACCCAATTTATTACTATATTTTTAGGTGTAAATTTAACAT  
TTTTTCCTCAACACTTTTTAGGGCTAAGAGGAATGCCTCGGCGATATTCGGATTA  
TCCAGATGCTTTCACTATCTGAAATGCCATTTTCATCTATTGGCTCCATTATTTCTC  
TCACAAGAATTATCTTTTTTTTTATTTATCTTATGAGAAAGGCTTTCTTCCCAACGT  
AAATCTTTGAGAACTTTAAATGTAACAACCTTCAATTGAATGGTTCAAGCCCTACC  
CCCTAGTG

CAM\_YAH

ATTATTAGACAAGAAAGGGGGGAAAAAAGAAGCTTTTGGACCTTAGGAATAATTTA  
TGCCATGATAGCTATCGGATTATTAGGATTTCGTAGTTTGAGCTCTCCATATATTT  
ACAGTAGATAGATGTAGATACCCGAGCTTACTTCACTTCAGCAACTATGATTATC  
GCGGTTCCAACCTGGGATTAAGTCTTTAGGTGACTAGCCACCTTTCATGGAACCT  
CAAATTTTAAATAGACCAGTAACCCTGTGAGCTTTAGGTTTTGTATTTTTATTTAC  
AGTAGGAGGATTAACAGGGGTAATTTTAGCTAATTCTTCAATTGATATTATTCTTC  
ACGATACTTACTATGTAGTAGCTCATTTTCACTATGTTCTTTCTATAGGAGCTGTA  
TTTGCAATTATAGCCGGAATTGTCCAATGATTCCCATTATTTACTGGACTAACCTT  
AAATAATTTTTTTTTTAAAAACCCAATTTATTACTATATTTTTAGGTGTAAATTTAACA  
TTTTTCCTCAACACTTTTTAGGGCTAAGAGGAATGCCTCGGCGATATTCGGATT  
ATCCAGATGCTTTCACTATCTGAAATGCCATTTTCATCTATTGGTTCCATTATTTCT  
CTCACAAGAATTATCTTTTTTTTTATTTATCTTATGAGAAAGGCTTTCTTCCCAACG  
TAAATCTTTGAGAACTTTAAATGTAACAACCTTCAATTGAATGGTTCAAGCCCTACC  
CCCTAGTG

CAM\_YAH01

ATTATTAGACAAGAAAGGGGGGAAAAAAGAAGCTTTTGGACCTTAGGAATAATTTA  
TGCCATGATAGCTATCGGATTATTAGGATTTCGTAGTTTGAGCTCTCCATATATTT  
ACAGTAGATAGATGTAGATACCCGAGCTTACTTCACTTCAGCAACTATGATTATC  
GCGGTTCCAACCTGGGATTAAGTCTTTAGGTGACTAGCCACCTTTCATGGAACCT  
CAAATTTTAAATAGACCAGTAACCCTGTGAGCTTTAGGTTTTGTATTTTTATTTAC  
AGTAGGAGGATTAACAGGGGTAATTTTAGCTAATTCTTCAATTGATATTATTCTTC  
ACGATACTTACTATGTAGTAGCTCATTTTCACTATGTTCTTTCTATAGGAGCTGTA  
TTTGCAATTATAGCCGGAATTGTCCAATGATTCCCATTATTTACTGGACTAACCTT  
AAATAATTTTTTTTTTAAAAACCCAATTTATTACTATATTTTTAGGTGTAAATTTAACA  
TTTTTCCTCAACACTTTTTAGGGCTAAGAGGAATGCCTCGGCGATATTCGGATT  
ATCCAGATGCTTTCACTATCTGAAATGCCATTTTCATCTATTGGTTCCATTATTTCT  
CTCACAAGAATTATCTTTTTTTTTATTTATCTTATGAGAAAGGCTTTCTTCCCAACG  
TAAATCTTTGAGAACTTTAAATGTAACAACCTTCAATTGAATGGTTCAAGCCCTACC  
CCCTAGTG

CAM\_YAH02

ATTATTAGACAAGAAAGGGGGGAAAAAAGAAGCTTTTGGACCTTAGGAATAATTTA  
TGCCATGATAGCTATCGGATTATTAGGATTTCGTAGTTTGAGCTCTCCATATATTT  
ACAGTAGATAGATGTAGATACCCGAGCTTACTTCACTTCAGCAACTATGATTATC  
GCGGTTCCAACCTGGGATTAAGTCTTTAGGTGACTAGCCACCTTTCATGGAACCT  
CAAATTTTAAATAGACCAGTAACCCTGTGAGCTTTAGGTTTTGTATTTTTATTTAC  
AGTAGGAGGATTAACAGGGGTAATTTTAGCTAATTCTTCAATTGATATTATTCTTC

ACGATACTTACTATGTAGTAGCTCATTTTTCACTATGTTCTTTCTATAGGAGCTGTA  
TTTGCAATTATAGCCGGAATTGTCCAATGATTCCTATTATTTACTGGACTAACCTT  
AAATAATTTTTTTTTAAAAACCCAATTTATTACTATATTTTTAGGTGTAAATTTAACA  
TTTTTTCCTCAACACTTTTTAGGGCTAAGAGGAATGCCTCGGCGATATTCGGATT  
ATCCAGATGCTTTCCTACTATCTGAAATGCCATTTTCATCTATTGGTTCCATTATTTCT  
CTCACAAGAATTATCTTTTTTTTTATTTATCTTATGAGAAAGGCTTTCTTCCCAACG  
TAAATCTTTGAGAACTTTAAATGTAACAACCTTCAATTGAATGGTTCAAGCCCTACC  
CCCTAGTG

China

ATTATTAGACAAGAAAGGGGGGAAAAAGAAGCTTTTGGACCTTAGGAATAATTTA  
TGCCATGATAGCTATCGGATTATTAGGATTCGTAGTTTGAGCTCACCATATATTT  
ACAGTAGATAGATGTAGATACCCGAGCTTACTTCACTTCAGCAACTATAATTATT  
GCGGTTCCAACACTGGGATTAAGTCTTTAGATGACTAGCCACCTTTCATGGAACCT  
CAAATTTTAAATAGACCAGTAACCCTGTGAGCTTTAGGTTTTGTATTTTTATTTAC  
AGTAGGAGGATTAACAGGGGTAATTTTAGCTAATTCTTCAATTGATATTATTCTTC  
ACGATACTTACTATGTAGTAGCTCATTTTTCACTATGTTCTTTCTATAGGAGCTGTA  
TTTGCAATTATAGCCGGAATTGTCCAATGATTCCTATTATTTACCGGACTAACCT  
TAAATAATTTTTTTTTAAAAACCCAATTTATTACTATATTTTTAGGTGTAAATTTAAC  
ATTTTTTCCCAACACTTTTTAGGGCTAAGAGGAATGCCTCGGCGATATTCGGAT  
TATCCAGATGCTTTCCTACTATCTGAAATGCCATTTTCATCTATTGGTTCCATTATTTCT  
TCTCACAAGAATTATCTTTTTTTTTATTTATCTTATGAGAAAGGCTTTCTTCCCAAC  
GTAATCTTTGAGAACTTTAAATGTAACAACCTTCAATTGAATGGTTCAAGCCCTAC  
CCCCTAGTG

FRA\_CHA\_5

ATTATTAGACAAGAAAGGGGGGAAAAAGAAGCTTTTGGACCTTAGGAATAATTTA  
TGCCATGATAGCTATCGGATTATTAGGATTCGTAGTTTGAGCTCACCATATATTT  
ACAGTAGATAGATGTAGATACCCGAGCTTACTTCACTTCAGCAACTATAATTATT  
GCGGTTCCAACACTGGGATTAAGTCTTTAGATGACTAGCCACCTTTCATGGAACCT  
CAAATTTTAAATAGACCAGTAACCCTGTGAGCTTTAGGCTTTGTATTTTTATTTAC  
AGTAGGAGGATTAACAGGGGTAATTTTAGCTAATTCTTCAATTGATATTATTCTTC  
ACGATACTTACTATGTAGTAGCTCATTTTTCACTATGTTCTTTCTATAGGAGCTGTA  
TTTGCAATTATAGCCGGAATTGTCCAATGATTTCCATTATTTACTGGACTAACCTT  
AAATAATTTTTTTTTAAAAACCCAATTTATTACTATATTTTTAGGTGTAAATTTAACA  
TTTTTTCCTCAACACTTTTTAGGGCTAAGAGGAATGCCTCGGCGATATTCGGATT  
ATCCAGATGCTTTCCTACTATCTGAAATGCCATTTTCATCTATTGGTTCCATTATTTCT  
CTCACAAGAATTATCTTTTTTTTTATTTATCTTATGAGAAAGGCTTTCTTCCCAACG  
TAAATCTTTGAGAACTTTAAATGTAACAACCTTCAATTGAATGGTTCAAGCCCTACC  
CCCTAGTG

SPA\_PRA\_1

ATTATTAGACAAGAAAGGGGGGAAAAAGAAGCTTTTGGACCTTAGGAATAATTTA  
TGCCATGATAGCTATCGGATTATTAGGATTCGTAGTTTGAGCTCACCATATATTT  
ACAGTAGATAGATGTAGATACCCGAGCTTACTTCACTTCAGCAACTATAATTATT  
GCGGTTCCAACACTGGGATTAAGTCTTTAGATGACTAGCCACCTTTCATGGAACCT  
CAAATTTTAAATAGACCAGTAACCCTGTGAGCTTTAGGTTTTGTATTTTTATTTAC  
AGTAGGAGGATTAACAGGGGTAATTTTAGCTAATTCTTCAATTGATATTATTCTTC  
ACGATACTTACTATGTAGTAGCTCATTTTTCACTATGTTCTTTCTATAGGAGCTGTA  
TTTGCAATTATAGCCGGAATTGTCCAATGATTCCTATTATTTACCGGACTAACCT  
TAAATAATTTTTTTTTAAAAACCCAATTTATTACTATATTTTTAGGTGTAAATTTAAC  
ATTTTTTCCCAACACTTTTTAGGGCTAAGAGGAATGCCTCGGCGATATTCGGAT  
TATCCAGATGCTTTCCTACTATCTGAAATGCCATTTTCATCTATTGGTTCCATTATTTCT

TCTCACAAGAATTATCTTTTTTTTTATTTATCTTATGAGAAAGGCTTTCTTCCCAAC  
GTAATCTTTGAGAACTTTAAATGTAACAACCTTCAATTGAATGGTTCAAGCCCTAC  
CCCCTAGTG

SWI\_NEU\_1

ATTATTAGACAAGAAAGGGGGGAAAAAAGAAGCTTTTGGACCTTAGGAATAATTTA  
TGCCATGATAGCTATCGGATTATTAGGATTCGTAGTTTGAGCTCACCATATATTT  
ACAGTAGATAGATGTAGATACCCGAGCTTACTTCACTTCAGCAACTATGATTATC  
GCGGTTCCAACCTGGGATTAAGTCTTTAGGTGGCTAGCCACCTTTTCATGGAAC  
CAAATTTTAAATAGACCAGTAACCCTGTGAGCTTTAGGTTTTGTATTTTTATTTAC  
AGTAGGAGGATTAACAGGGGTAATTTAGCTAATTCTTCAATTGATATTATTCTTC  
ACGATACTTACTATGTAGTAGCTCATTTTCACTATGTTCTTTCTATAGGAGCTGTA  
TTTGCAATTATAGCCGGAATTGTCCAATGATTCCCATTATTTACTGGACTAACCTT  
AAATAATTTTTTTTTAAAAACCCAATTTATTACTATATTTTTAGGTGTAAATTTAACA  
TTTTTTCCTCAACACTTTTTAGGGCTAAGAGGAATGCCTCGGCGATATTTCGGATT  
ATCCAGATGCTTTCACTATCTGAAATGCCATTTTCATCTATTGGTTCCATTATTTCT  
CTCACAAGAATTATCTTTTTTTTTATTTATCTTATGAGAAAGGCTTTCTTCCCAACG  
TAAATCTTTGAGAACTTTAAATGTAACAACCTTCAATTGAATGGTTCAAGCCCTACC  
CCCTAGTG

SWT\_NEU

ATTATTAGACAAGAAAGGGGGGAAAAAAGAAGCTTTTGGACCTTAGGAATAATTTA  
TGCCATGATAGCTATCGGATTATTAGGATTCGTAGTTTGAGCTCACCATATATTT  
ACAGTAGATAGATGTAGATACCCGAGCTTACTTCACTTCAGCAACTATGATTATC  
GCGGTTCCAACCTGGGATTAAGTCTTTAGGTGGCTAGCCACCTTTTCATGGAAC  
CAAATTTTAAATAGACCAGTAACCCTGTGAGCTTTAGGTTTTGTATTTTTATTTAC  
AGTAGGAGGATTAACAGGGGTAATTTAGCTAATTCTTCAATTGATATTATTCTTC  
ACGATACTTACTATGTAGTAGCTCATTTTCACTATGTTCTTTCTATAGGAGCTGTA  
TTTGCAATTATAGCCGGAATTGTCCAATGATTCCCATTATTTACTGGACTAACCTT  
AAATAATTTTTTTTTAAAAACCCAATTTATTACTATATTTTTAGGTGTAAATTTAACA  
TTTTTTCCTCAACACTTTTTAGGGCTAAGAGGAATGCCTCGGCGATATTTCGGATT  
ATCCAGATGCTTTCACTATCTGAAATGCCATTTTCATCTATTGGTTCCATTATTTCT  
CTCACAAGAATTATCTTTTTTTTTATTTATCTTATGAGAAAGGCTTTCTTCCCAACG  
TAAATCTTTGAGAACTTTAAATGTAACAACCTTCAATTGAATGGTTCAAGCCCTACC  
CCCTAGTG

SWT\_NEU2

ATTATTAGACAAGAAAGGGGGGAAAAAAGAAGCTTTTGGACCTTAGGAATAATTTA  
TGCCATGATAGCTATCGGATTATTAGGATTCGTAGTTTGAGCTCACCATATATTT  
ACAGTAGATAGATGTAGATACCCGAGCTTACTTCACTTCAGCAACTATGATTATC  
GCGGTTCCAACCTGGGATTAAGTCTTTAGGTGGCTAGCCACCTTTTCATGGAAC  
CAAATTTTAAATAGACCAGTAACCCTGTGAGCTTTAGGTTTTGTATTTTTATTTAC  
AGTAGGAGGATTAACAGGGGTAATTTAGCTAATTCTTCAATTGATATTATTCTTC  
ACGATACTTACTATGTAGTAGCTCATTTTCACTATGTTCTTTCTATAGGAGCTGTA  
TTTGCAATTATAGCCGGAATTGTCCAATGATTCCCATTATTTACTGGACTAACCTT  
AAATAATTTTTTTTTAAAAACCCAATTTATTACTATATTTTTAGGTGTAAATTTAACA  
TTTTTTCCTCAACACTTTTTAGGGCTAAGAGGAATGCCTCGGCGATATTTCGGATT  
ATCCAGATGCTTTCACTATCTGAAATGCCATTTTCATCTATTGGTTCCATTATTTCT  
CTCACAAGAATTATCTTTTTTTTTATTTATCTTATGAGAAAGGCTTTCTTCCCAACG  
TAAATCTTTGAGAACTTTAAATGTAACAACCTTCAATTGAATGGTTCAAGCCCTACC  
CCCTAGTG

AOPE\_15

ATTATTAGACAAGAAAGGGGGGAAAAAAGAAGCTTTTGGACCTTAGGAATAATTTA

TGCTATAATAGCTATCGGATTATTAGGATTCGTAGTTTGAGCTCACCATATATTTA  
CAGTAGATAGATGTAGATACCCGAGCTTACTTCACTTCAGCAACTATAATTATTG  
CGGTTCCAACCTGGGATTAAGTCTTTAGATGACTAGCCACCTTTTCATGGAACCTCA  
AATTTTAAATAGACCAGTAACCCTGTGAGCTTTAGGTTTTGTATTTTTATTTACAG  
TAGGAGGATTAACAGGGGTAATTTTAGCTAATTCTTCAATTGATATTATTCTCCAC  
GATACTTACTATGTAGTAGCTCATTTTCACTATGTTCTTTCTATAGGAGCTGTATT  
TGCAATTATAGCCGGAATTGTCCAATGATTCCCATTATTTACCGGACTAACCTTA  
AATAATTTTTTTTTTAAAAACCCAATTTATTACTATATTTTTTAGGTGTAAATTTAACAT  
TTTTTCCTCAACACTTTTTAGGGCTAAGAGGAATGCCTCGGCGATATTCGGATTA  
TCCAGATGCTTTCACTATCTGAAATGCCATTTTCATCTATTGGTTCCATTATTTCTC  
TCACAAGAATTATCTTTTTTTTTATTTATCTTATGAGAAAGGCTTTCTTCCCAACGT  
AAATCTTTGAGAACCTTTAAATGTAACAACCTTCAATTGAATGGTTCAAGCCCTACC  
CCCTAGTG

AOPE\_2

ATTATTAGACAAGAAAGGGGGGAAAAAAGAAGCTTTTGGACCTTAGGAATAATTTA  
TGCTATAATAGCTATCGGATTATTAGGATTCGTAGTTTGAGCTCACCATATATTTA  
CAGTAGATAGATGTAGATACCCGAGCTTACTTCACTTCAGCAACTATAATTATTG  
CGGTTCCAACCTGGGATTAAGTCTTTAGATGACTAGCCACCTTTTCATGGAACCTCA  
AATTTTAAATAGACCAGTAACCCTGTGAGCTTTAGGTTTTGTATTTTTATTTACAG  
TAGGAGGATTAACAGGGGTAATTTTAGCTAATTCTTCAATTGATATTATTCTCCAC  
GATACTTACTATGTAGTAGCTCATTTTCACTATGTTCTTTCTATAGGAGCTGTATT  
TGCAATTATAGCCGGAATTGTCCAATGATTCCCATTATTTACCGGACTAACCTTA  
AATAATTTTTTTTTTAAAAACCCAATTTATTACTATATTTTTTAGGTGTAAATTTAACAT  
TTTTTCCTCAACACTTTTTAGGGCTAAGAGGAATGCCTCGGCGATATTCGGATTA  
TCCAGATGCTTTCACTATCTGAAATGCCATTTTCATCTATTGGTTCCATTATTTCTC  
TCACAAGAATTATCTTTTTTTTTATTTATCTTATGAGAAAGGCTTTCTTCCCAACGT  
AAATCTTTGAGAACCTTTAAATGTAACAACCTTCAATTGAATGGTTCAAGCCCTACC  
CCCTAGTG

AOPE\_3

ATTATTAGACAAGAAAGGGGGGAAAAAAGAAGCTTTTGGACCTTAGGAATAATTTA  
TGCTATAATAGCTATCGGATTATTAGGATTCGTAGTTTGAGCTCACCATATATTTA  
CAGTAGATAGATGTAGATACCCGAGCTTACTTCACTTCAGCAACTATAATTATTG  
CGGTTCCAACCTGGGATTAAGTCTTTAGATGACTAGCCACCTTTTCATGGAACCTCA  
AATTTTAAATAGACCAGTAACCCTGTGAGCTTTAGGTTTTGTATTTTTATTTACAG  
TAGGAGGATTAACAGGGGTAATTTTAGCTAATTCTTCAATTGATATTATTCTCCAC  
GATACTTACTATGTAGTAGCTCATTTTCACTATGTTCTTTCTATAGGAGCTGTATT  
TGCAATTATAGCCGGAATTGTCCAATGATTCCCATTATTTACCGGACTAACCTTA  
AATAATTTTTTTTTTAAAAACCCAATTTATTACTATATTTTTTAGGTGTAAATTTAACAT  
TTTTTCCTCAACACTTTTTAGGGCTAAGAGGAATGCCTCGGCGATATTCGGATTA  
TCCAGATGCTTTCACTATCTGAAATGCCATTTTCATCTATTGGTTCCATTATTTCTC  
TCACAAGAATTATCTTTTTTTTTATTTATCTTATGAGAAAGGCTTTCTTCCCAACGT  
AAATCTTTGAGAACCTTTAAATGTAACAACCTTCAATTGAATGGTTCAAGCCCTACC  
CCCTAGTG

AOPE\_12

ATTATTAGACAAGAAAGGGGGGAAAAAAGAAGCTTTTGGACCTTAGGAATAATTTA  
TGCTATAATAGCTATCGGATTATTAGGATTCGTAGTTTGAGCTCACCATATATTTA  
CAGTAGATAGATGTAGATACCCGAGCTTACTTCACTTCAGCAACTATAATTATTG  
CGGTTCCAACCTGGGATTAAGTCTTTAGATGACTAGCCACCTTTTCATGGAACCTCA  
AATTTTAAATAGACCAGTAACCCTGTGAGCTTTAGGTTTTGTATTTTTATTTACAG  
TAGGAGGATTAACAGGGGTAATTTTAGCTAATTCTTCAATTGATATTATTCTCCAC



GATACTTACTATGTAGTAGCTCATTTTTCACTATGTTCTTTCTATAGGAGCTGTATT  
TGCAATTATAGCCGGAATTGTCCAATGATTCCCATTATTTACCGGACTAACCTTA  
ATAAATTTTTTTTTAAAAACCCAATTTATTACTATATTTTTAGGTGTAATTTAACAT  
TTTTTCCTCAACACTTTTTAGGGCTAAGAGGAATGCCTCGGCGATATTCGGATTA  
TCCAGATGCTTTCACTATCTGAAATGCCATTTTCATCTATTGGTTCCATTATTTCTC  
TCACAAGAATTATCTTTTTTTTTATTTATCTTATGAGAAAGGCTTTCTTCCCAACGT  
AAATCTTTGAGAACTTTAAATGTAACAACCTTCAATTGAATGGTTCAAGCCCTACC  
CCCTAGTG

AOPE\_13

ATTATTAGACAAGAAAGGGGGAAAAAAGAAGCTTTTGGACCTTAGGAATAATTTA  
TGCTATAATAGCTATCGGATTATTAGGATTCGTAGTTTGAGCTCACCATATATTTA  
CAGTAGATAGATGTAGATACCCGAGCTTACTTCACTTCAGCAACTATAATTATTG  
CGGTTCCAACCTGGGATTAAGTCTTTAGATGACTAGCCACCTTTTCATGGAACCTCA  
AATTTTAAATAGACCAGTAACCCTGTGAGCTTTAGGTTTTGTATTTTTATTTACAG  
TAGGAGGATTAACAGGGGTAATTTTAGCTAATTCTTCAATTGATATTATTCTCCAC  
GATACTTACTATGTAGTAGCTCATTTTTCACTATGTTCTTTCTATAGGAGCTGTATT  
TGCAATTATAGCCGGAATTGTCCAATGATTCCCATTATTTACCGGACTAACCTTA  
ATAAATTTTTTTTTAAAAACCCAATTTATTACTATATTTTTAGGTGTAATTTAACAT  
TTTTTCCTCAACACTTTTTAGGGCTAAGAGGAATGCCTCGGCGATATTCGGATTA  
TCCAGATGCTTTCACTATCTGAAATGCCATTTTCATCTATTGGTTCCATTATTTCTC  
TCACAAGAATTATCTTTTTTTTTATTTATCTTATGAGAAAGGCTTTCTTCCCAACGT  
AAATCTTTGAGAACTTTAAATGTAACAACCTTCAATTGAATGGTTCAAGCCCTACC  
CCCTAGTG

AOPE\_14

ATTATTAGACAAGAAAGGGGGAAAAAAGAAGCTTTTGGACCTTAGGAATAATTTA  
TGCTATAATAGCTATCGGATTATTAGGATTCGTAGTTTGAGCTCACCATATATTTA  
CAGTAGATAGATGTAGATACCCGAGCTTACTTCACTTCAGCAACTATAATTATTG  
CGGTTCCAACCTGGGATTAAGTCTTTAGATGACTAGCCACCTTTTCATGGAACCTCA  
AATTTTAAATAGACCAGTAACCCTGTGAGCTTTAGGTTTTGTATTTTTATTTACAG  
TAGGAGGATTAACAGGGGTAATTTTAGCTAATTCTTCAATTGATATTATTCTCCAC  
GATACTTACTATGTAGTAGCTCATTTTTCACTATGTTCTTTCTATAGGAGCTGTATT  
TGCAATTATAGCCGGAATTGTCCAATGATTCCCATTATTTACCGGACTAACCTTA  
ATAAATTTTTTTTTAAAAACCCAATTTATTACTATATTTTTAGGTGTAATTTAACAT  
TTTTTCCTCAACACTTTTTAGGGCTAAGAGGAATGCCTCGGCGATATTCGGATTA  
TCCAGATGCTTTCACTATCTGAAATGCCATTTTCATCTATTGGTTCCATTATTTCTC  
TCACAAGAATTATCTTTTTTTTTATTTATCTTATGAGAAAGGCTTTCTTCCCAACGT  
AAATCTTTGAGAACTTTAAATGTAACAACCTTCAATTGAATGGTTCAAGCCCTACC  
CCCTAGTG

AOPE\_4

ATTATTAGACAAGAAAGGGGGAAAAAAGAAGCTTTTGGACCTTAGGAATAATTTA  
TGCTATAATAGCTATCGGATTATTAGGATTCGTAGTTTGAGCTCACCATATATTTA  
CAGTAGATAGATGTAGATACCCGAGCTTACTTCACTTCAGCAACTATAATTATTG  
CGGTTCCAACCTGGGATTAAGTCTTTAGATGACTAGCCACCTTTTCATGGAACCTCA  
AATTTTAAATAGACCAGTAACCCTGTGAGCTTTAGGTTTTGTATTTTTATTTACAG  
TAGGAGGATTAACAGGGGTAATTTTAGCTAATTCTTCAATTGATATTATTCTCCAC  
GATACTTACTATGTAGTAGCTCATTTTTCACTATGTTCTTTCTATAGGAGCTGTATT  
TGCAATTATAGCCGGAATTGTCCAATGATTCCCATTATTTACCGGACTAACCTTA  
ATAAATTTTTTTTTAAAAACCCAATTTATTACTATATTTTTAGGTGTAATTTAACAT  
TTTTTCCTCAACACTTTTTAGGGCTAAGAGGAATGCCTCGGCGATATTCGGATTA  
TCCAGATGCTTTCACTATCTGAAATGCCATTTTCATCTATTGGTTCCATTATTTCTC

TCACAAGAATTATCTTTTTTTTTATTTATCTTATGAGAAAGGCTTTCTTCCCAACGT  
AAATCTTTGAGAACTTTAAATGTAACAACCTTCAATTGAATGGTTCAAGCCCTACC  
CCCTAGTG

PE2\_1

ATTATTAGACAAGAAAGGGGGGAAAAAAGAAGCTTTTGGACCTTAGGAATAATTTA  
TGCTATAATAGCTATCGGATTATTAGGATTCGTAGTTTGAGCTCACCATATATTTA  
CAGTAGATAGATGTAGATACCCGAGCTTACTTCACTTCAGCAACTATAATTATTG  
CGGTTCCAACCTGGGATTAAGTCTTTAGATGACTAGCCACCTTTCATGGAACCTCA  
AATTTTAAATAGACCAGTAACCCTGTGAGCTTTAGGTTTTGTATTTTTATTTACAG  
TAGGAGGATTAACAGGGGTAAATTTAGCTAATTCTTCAATTGATATTATTCTCCAC  
GATACTTACTATGTAGTAGCTCATTTTCACTATGTTCTTTCTATAGGAGCTGTATT  
TGCAATTATAGCCGGAATTGTCCAATGATTCCCATTATTTACCGGACTAACCTTA  
ATAAATTTTTTTTTAAAAACCCAATTTATTACTATATTTTTAGGTGTAATTTAACAT  
TTTTTCCTCAACACTTTTTAGGGCTAAGAGGAATGCCTCGGCGATATTCGGATTA  
TCCAGATGCTTTCACTATCTGAAATGCCATTTTCATCTATTGGTTCCATTATTTCTC  
TCACAAGAATTATCTTTTTTTTTATTTATCTTATGAGAAAGGCTTTCTTCCCAACGT  
AAATCTTTGAGAACTTTAAATGTAACAACCTTCAATTGAATGGTTCAAGCCCTACC  
CCCTAGTG

PE2\_2

ATTATTAGACAAGAAAGGGGGGAAAAAAGAAGCTTTTGGACCTTAGGAATAATTTA  
TGCTATAATAGCTATCGGATTATTAGGATTCGTAGTTTGAGCTCACCATATATTTA  
CAGTAGATAGATGTAGATACCCGAGCTTACTTCACTTCAGCAACTATAATTATTG  
CGGTTCCAACCTGGGATTAAGTCTTTAGATGACTAGCCACCTTTCATGGAACCTCA  
AATTTTAAATAGACCAGTAACCCTGTGAGCTTTAGGTTTTGTATTTTTATTTACAG  
TAGGAGGATTAACAGGGGTAAATTTAGCTAATTCTTCAATTGATATTATTCTCCAC  
GATACTTACTATGTAGTAGCTCATTTTCACTATGTTCTTTCTATAGGAGCTGTATT  
TGCAATTATAGCCGGAATTGTCCAATGATTCCCATTATTTACCGGACTAACCTTA  
ATAAATTTTTTTTTAAAAACCCAATTTATTACTATATTTTTAGGTGTAATTTAACAT  
TTTTTCCTCAACACTTTTTAGGGCTAAGAGGAATGCCTCGGCGATATTCGGATTA  
TCCAGATGCTTTCACTATCTGAAATGCCATTTTCATCTATTGGTTCCATTATTTCTC  
TCACAAGAATTATCTTTTTTTTTATTTATCTTATGAGAAAGGCTTTCTTCCCAACGT  
AAATCTTTGAGAACTTTAAATGTAACAACCTTCAATTGAATGGTTCAAGCCCTACC  
CCCTAGTG

PE2\_3

ATTATTAGACAAGAAAGGGGGGAAAAAAGAAGCTTTTGGACCTTAGGAATAATTTA  
TGCTATAATAGCTATCGGATTATTAGGATTCGTAGTTTGAGCTCACCATATATTTA  
CAGTAGATAGATGTAGATACCCGAGCTTACTTCACTTCAGCAACTATAATTATTG  
CGGTTCCAACCTGGGATTAAGTCTTTAGATGACTAGCCACCTTTCATGGAACCTCA  
AATTTTAAATAGACCAGTAACCCTGTGAGCTTTAGGTTTTGTATTTTTATTTACAG  
TAGGAGGATTAACAGGGGTAAATTTAGCTAATTCTTCAATTGATATTATTCTCCAC  
GATACTTACTATGTAGTAGCTCATTTTCACTATGTTCTTTCTATAGGAGCTGTATT  
TGCAATTATAGCCGGAATTGTCCAATGATTCCCATTATTTACCGGACTAACCTTA  
ATAAATTTTTTTTTAAAAACCCAATTTATTACTATATTTTTAGGTGTAATTTAACAT  
TTTTTCCTCAACACTTTTTAGGGCTAAGAGGAATGCCTCGGCGATATTCGGATTA  
TCCAGATGCTTTCACTATCTGAAATGCCATTTTCATCTATTGGTTCCATTATTTCTC  
TCACAAGAATTATCTTTTTTTTTATTTATCTTATGAGAAAGGCTTTCTTCCCAACGT  
AAATCTTTGAGAACTTTAAATGTAACAACCTTCAATTGAATGGTTCAAGCCCTACC  
CCCTAGTG

PE2\_4

ATTATTAGACAAGAAAGGGGGGAAAAAAGAAGCTTTTGGACCTTAGGAATAATTTA

TGCTATAATAGCTATCGGATTATTAGGATTCGTAGTTTGAGCTCACCATATATTTA  
CAGTAGATAGATGTAGATACCCGAGCTTACTTCACTTCAGCAACTATAATTATTG  
CGGTTCCAACCTGGGATTAAGTCTTTAGATGACTAGCCACCTTTCATGGAACTCA  
AATTTTAAATAGACCAGTAACCCTGTGAGCTTTAGGTTTTGTATTTTTATTTACAG  
TAGGAGGATTAACAGGGGTAATTTTAGCTAATTCTTCAATTGATATTATTCTCCAC  
GATACTTACTATGTAGTAGCTCATTTTCACTATGTTCTTTCTATAGGAGCTGTATT  
TGCAATTATAGCCGGAATTGTCCAATGATTCCCATTATTTACCGGACTAACCTTA  
AATAATTTTTTTTTTAAAAACCCAATTTATTACTATATTTTTAGGTGTAAATTTAACAT  
TTTTTCCTCAACACTTTTTAGGGCTAAGAGGAATGCCTCGGCGATATTCGGATTA  
TCCAGATGCTTTCACTATCTGAAATGCCATTTTCATCTATTGGTTCCATTATTTCTC  
TCACAAGAATTATCTTTTTTTTTATTTATCTTATGAGAAAGGCTTTCTTCCCAACGT  
AAATCTTTGAGAACCTTTAAATGTAACAACCTTCAATTGAATGGTTCAAGCCCTACC  
CCCTAGTG

PE2\_5

ATTATTAGACAAGAAAGGGGGGAAAAAAGAAGCTTTTGGACCTTAGGAATAATTTA  
TGCTATAATAGCTATCGGATTATTAGGATTCGTAGTTTGAGCTCACCATATATTTA  
CAGTAGATAGATGTAGATACCCGAGCTTACTTCACTTCAGCAACTATAATTATTG  
CGGTTCCAACCTGGGATTAAGTCTTTAGATGACTAGCCACCTTTCATGGAACTCA  
AATTTTAAATAGACCAGTAACCCTGTGAGCTTTAGGTTTTGTATTTTTATTTACAG  
TAGGAGGATTAACAGGGGTAATTTTAGCTAATTCTTCAATTGATATTATTCTCCAC  
GATACTTACTATGTAGTAGCTCATTTTCACTATGTTCTTTCTATAGGAGCTGTATT  
TGCAATTATAGCCGGAATTGTCCAATGATTCCCATTATTTACCGGACTAACCTTA  
AATAATTTTTTTTTTAAAAACCCAATTTATTACTATATTTTTAGGTGTAAATTTAACAT  
TTTTTCCTCAACACTTTTTAGGGCTAAGAGGAATGCCTCGGCGATATTCGGATTA  
TCCAGATGCTTTCACTATCTGAAATGCCATTTTCATCTATTGGTTCCATTATTTCTC  
TCACAAGAATTATCTTTTTTTTTATTTATCTTATGAGAAAGGCTTTCTTCCCAACGT  
AAATCTTTGAGAACCTTTAAATGTAACAACCTTCAATTGAATGGTTCAAGCCCTACC  
CCCTAGTG

PE2\_6

ATTATTAGACAAGAAAGGGGGGAAAAAAGAAGCTTTTGGACCTTAGGAATAATTTA  
TGCTATAATAGCTATCGGATTATTAGGATTCGTAGTTTGAGCTCACCATATATTTA  
CAGTAGATAGATGTAGATACCCGAGCTTACTTCACTTCAGCAACTATAATTATTG  
CGGTTCCAACCTGGGATTAAGTCTTTAGATGACTAGCCACCTTTCATGGAACTCA  
AATTTTAAATAGACCAGTAACCCTGTGAGCTTTAGGTTTTGTATTTTTATTTACAG  
TAGGAGGATTAACAGGGGTAATTTTAGCTAATTCTTCAATTGATATTATTCTCCAC  
GATACTTACTATGTAGTAGCTCATTTTCACTATGTTCTTTCTATAGGAGCTGTATT  
TGCAATTATAGCCGGAATTGTCCAATGATTCCCATTATTTACCGGACTAACCTTA  
AATAATTTTTTTTTTAAAAACCCAATTTATTACTATATTTTTAGGTGTAAATTTAACAT  
TTTTTCCTCAACACTTTTTAGGGCTAAGAGGAATGCCTCGGCGATATTCGGATTA  
TCCAGATGCTTTCACTATCTGAAATGCCATTTTCATCTATTGGTTCCATTATTTCTC  
TCACAAGAATTATCTTTTTTTTTATTTATCTTATGAGAAAGGCTTTCTTCCCAACGT  
AAATCTTTGAGAACCTTTAAATGTAACAACCTTCAATTGAATGGTTCAAGCCCTACC  
CCCTAGTG

PE2\_7

ATTATTAGACAAGAAAGGGGGGAAAAAAGAAGCTTTTGGACCTTAGGAATAATTTA  
TGCTATAATAGCTATCGGATTATTAGGATTCGTAGTTTGAGCTCACCATATATTTA  
CAGTAGATAGATGTAGATACCCGAGCTTACTTCACTTCAGCAACTATAATTATTG  
CGGTTCCAACCTGGGATTAAGTCTTTAGATGACTAGCCACCTTTCATGGAACTCA  
AATTTTAAATAGACCAGTAACCCTGTGAGCTTTAGGTTTTGTATTTTTATTTACAG  
TAGGAGGATTAACAGGGGTAATTTTAGCTAATTCTTCAATTGATATTATTCTCCAC

GATACTTACTATGTAGTAGCTCATTTTTCACTATGTTCTTTCTATAGGAGCTGTATT  
TGCAATTATAGCCGGAATTGTCCAATGATTCCCATTATTTACCGGACTAACCTTA  
ATAAATTTTTTTTTAAAAACCCAATTTATTACTATATTTTTAGGTGTAAATTTAACAT  
TTTTTCCTCAACACTTTTTAGGGCTAAGAGGAATGCCTCGGCGATATTCGGATTA  
TCCAGATGCTTTCACTATCTGAAATGCCATTTTCATCTATTGGTTCCATTATTTCTC  
TCACAAGAATTATCTTTTTTTTTATTTATCTTATGAGAAAGGCTTTCTTCCCAACGT  
AAATCTTTGAGAACTTTAAATGTAACAACCTTCAATTGAATGGTTCAAGCCCTACC  
CCCTAGTG

PE3\_1

ATTATTAGACAAGAAAGGGGGAAAAAAGAAGCTTTTGGACCTTAGGAATAATTTA  
TGCTATAATAGCTATCGGATTATTAGGATTCGTAGTTTGAGCTCACCATATATTTA  
CAGTAGATAGATGTAGATACCCGAGCTTACTTCACTTCAGCAACTATAATTATTG  
CGGTTCCAACCTGGGATTAAGTCTTTAGATGACTAGCCACCTTTTCATGGAACCTCA  
AATTTAAATAGACCAGTAACCCTGTGAGCTTTAGGTTTTGTATTTTTATTTACAG  
TAGGAGGATTAACAGGGGGTAATTTTAGCTAATTCTTCAATTGATATTATTCTCCAC  
GATACTTACTATGTAGTAGCTCATTTTTCACTATGTTCTTTCTATAGGAGCTGTATT  
TGCAATTATAGCCGGAATTGTCCAATGATTCCCATTATTTACCGGACTAACCTTA  
ATAAATTTTTTTTTAAAAACCCAATTTATTACTATATTTTTAGGTGTAAATTTAACAT  
TTTTTCCTCAACACTTTTTAGGGCTAAGAGGAATGCCTCGGCGATATTCGGATTA  
TCCAGATGCTTTCACTATCTGAAATGCCATTTTCATCTATTGGTTCCATTATTTCTC  
TCACAAGAATTATCTTTTTTTTTATTTATCTTATGAGAAAGGCTTTCTTCCCAACGT  
AAATCTTTGAGAACTTTAAATGTAACAACCTTCAATTGAATGGTTCAAGCCCTACC  
CCCTAGTG

PE4\_1

ATTATTAGACAAGAAAGGGGGAAAAAAGAAGCTTTTGGACCTTAGGAATAATTTA  
TGCTATAATAGCTATCGGATTATTAGGATTCGTAGTTTGAGCTCACCATATATTTA  
CAGTAGATAGATGTAGATACCCGAGCTTACTTCACTTCAGCAACTATAATTATTG  
CGGTTCCAACCTGGGATTAAGTCTTTAGATGACTAGCCACCTTTTCATGGAACCTCA  
AATTTAAATAGACCAGTAACCCTGTGAGCTTTAGGTTTTGTATTTTTATTTACAG  
TAGGAGGATTAACAGGGGGTAATTTTAGCTAATTCTTCAATTGATATTATTCTCCAC  
GATACTTACTATGTAGTAGCTCATTTTTCACTATGTTCTTTCTATAGGAGCTGTATT  
TGCAATTATAGCCGGAATTGTCCAATGATTCCCATTATTTACCGGACTAACCTTA  
ATAAATTTTTTTTTAAAAACCCAATTTATTACTATATTTTTAGGTGTAAATTTAACAT  
TTTTTCCTCAACACTTTTTAGGGCTAAGAGGAATGCCTCGGCGATATTCGGATTA  
TCCAGATGCTTTCACTATCTGAAATGCCATTTTCATCTATTGGTTCCATTATTTCTC  
TCACAAGAATTATCTTTTTTTTTATTTATCTTATGAGAAAGGCTTTCTTCCCAACGT  
AAATCTTTGAGAACTTTAAATGTAACAACCTTCAATTGAATGGTTCAAGCCCTACC  
CCCTAGTG

PE4\_2

ATTATTAGACAAGAAAGGGGGAAAAAAGAAGCTTTTGGACCTTAGGAATAATTTA  
TGCTATAATAGCTATCGGATTATTAGGATTCGTAGTTTGAGCTCACCATATATTTA  
CAGTAGATAGATGTAGATACCCGAGCTTACTTCACTTCAGCAACTATAATTATTG  
CGGTTCCAACCTGGGATTAAGTCTTTAGATGACTAGCCACCTTTTCATGGAACCTCA  
AATTTAAATAGACCAGTAACCCTGTGAGCTTTAGGTTTTGTATTTTTATTTACAG  
TAGGAGGATTAACAGGGGGTAATTTTAGCTAATTCTTCAATTGATATTATTCTCCAC  
GATACTTACTATGTAGTAGCTCATTTTTCACTATGTTCTTTCTATAGGAGCTGTATT  
TGCAATTATAGCCGGAATTGTCCAATGATTCCCATTATTTACCGGACTAACCTTA  
ATAAATTTTTTTTTAAAAACCCAATTTATTACTATATTTTTAGGTGTAAATTTAACAT  
TTTTTCCTCAACACTTTTTAGGGCTAAGAGGAATGCCTCGGCGATATTCGGATTA  
TCCAGATGCTTTCACTATCTGAAATGCCATTTTCATCTATTGGTTCCATTATTTCTC

TCACAAGAATTATCTTTTTTTTTATTTATCTTATGAGAAAGGCTTTCTTCCCAACGT  
AAATCTTTGAGAACTTTAAATGTAACAACCTTCAATTGAATGGTTCAAGCCCTACC  
CCCTAGTG

PE4\_3

ATTATTAGACAAGAAAGGGGGGAAAAAAGAAGCTTTTGGACCTTAGGAATAATTTA  
TGCTATAATAGCTATCGGATTATTAGGATTCGTAGTTTGAGCTCACCATATATTTA  
CAGTAGATAGATGTAGATACCCGAGCTTACTTCACTTCAGCAACTATAATTATTG  
CGGTTCCAACCTGGGATTAAGTCTTTAGATGACTAGCCACCTTTTCATGGAACCTCA  
AATTTTAAATAGACCAGTAACCCTGTGAGCTTTAGGTTTTGTATTTTTATTTACAG  
TAGGAGGATTAACAGGGGTAAATTTAGCTAATTCTTCAATTGATATTATTCTCCAC  
GATACTTACTATGTAGTAGCTCATTTTCACTATGTTCTTTCTATAGGAGCTGTATT  
TGCAATTATAGCCGGAATTGTCCAATGATTCCCATTATTTACCGGACTAACCTTA  
ATAATTTTTTTTTTAAAAACCCAATTTATTACTATATTTTTAGGTGTAATTTAACAT  
TTTTTCCTCAACACTTTTTAGGGCTAAGAGGAATGCCTCGGCGATATTCGGATTA  
TCCAGATGCTTTCACTATCTGAAATGCCATTTTCATCTATTGGTTCCATTATTTCTC  
TCACAAGAATTATCTTTTTTTTTATTTATCTTATGAGAAAGGCTTTCTTCCCAACGT  
AAATCTTTGAGAACTTTAAATGTAACAACCTTCAATTGAATGGTTCAAGCCCTACC  
CCCTAGTG

PE4\_5

ATTATTAGACAAGAAAGGGGGGAAAAAAGAAGCTTTTGGACCTTAGGAATAATTTA  
TGCTATAATAGCTATCGGATTATTAGGATTCGTAGTTTGAGCTCACCATATATTTA  
CAGTAGATAGATGTAGATACCCGAGCTTACTTCACTTCAGCAACTATAATTATTG  
CGGTTCCAACCTGGGATTAAGTCTTTAGATGACTAGCCACCTTTTCATGGAACCTCA  
AATTTTAAATAGACCAGTAACCCTGTGAGCTTTAGGTTTTGTATTTTTATTTACAG  
TAGGAGGATTAACAGGGGTAAATTTAGCTAATTCTTCAATTGATATTATTCTCCAC  
GATACTTACTATGTAGTAGCTCATTTTCACTATGTTCTTTCTATAGGAGCTGTATT  
TGCAATTATAGCCGGAATTGTCCAATGATTCCCATTATTTACCGGACTAACCTTA  
ATAATTTTTTTTTTAAAAACCCAATTTATTACTATATTTTTAGGTGTAATTTAACAT  
TTTTTCCTCAACACTTTTTAGGGCTAAGAGGAATGCCTCGGCGATATTCGGATTA  
TCCAGATGCTTTCACTATCTGAAATGCCATTTTCATCTATTGGTTCCATTATTTCTC  
TCACAAGAATTATCTTTTTTTTTATTTATCTTATGAGAAAGGCTTTCTTCCCAACGT  
AAATCTTTGAGAACTTTAAATGTAACAACCTTCAATTGAATGGTTCAAGCCCTACC  
CCCTAGTG

PE\_12

ATTATTAGTCAAGAAAGGGGGGAAAAAAGAACCTTTTGGACCTTAGGAATAATTTA  
TGCTATAATAGCTATCGGATTATTAGGATTCGTAGTTTGAGCTCACCATATATTTA  
CAGTAGATAGATGTAGATACCCGAGCTTACTTCACTTCAGCAACTATAATTATTG  
CGGTTCCAACCTGGGATTAAGTCTTTAGATGACTAGCCACCTTTTCATGGAACCTCA  
AATTTTAAATAGACCAGTAACCCTGTGAGCTTTAGGTTTTGTATTTTTATTTACAG  
TAGGAGGATTAACAGGGGTAAATTTAGCTAATTCTTCAATTGATATTATTCTCCAC  
GATACTTACTATGTAGTAGCTCATTTTCACTATGTTCTTTCTATAGGAGCTGTATT  
TGCAATTATAGCCGGAATTGTCCAATGATTCCCATTATTTACCGGACTAACCTTA  
ATAATTTTTTTTTTAAAAACCCAATTTATTACTATATTTTTAGGTGTAATTTAACAT  
TTTTTCCTCAACACTTTTTAGGGCTAAGAGGAATGCCTCGGCGATATTCGGATTA  
TCCAGATGCTTTCACTATCTGAAATGCCATTTTCATCTATTGGTTCCATTATTTCTC  
TCACAAGAATTATCTTTTTTTTTATTTATCTTATGAGAAAGGCTTTCTTCCCAACGT  
AAATCTTTGAGAACTTTAAATGTAACAACCTTCAATTGAATGGTTCAAGCCCTACC  
CCCTAGTG

PE\_13

ATTATTAGACAAGAAAGGGGGGAAAAAAGAACCTTTTGGACCTTAGGAATAATTTA

TGCTATAATAGCTATCGGATTATTAGGATTCGTAGTTTGAGCTCACCATATATTTA  
CAGTAGATAGATGTAGATACCCGAGCTTACTTCACTTCAGCAACTATAATTATTG  
CGGTTCCAACCTGGGATTAAGTCTTTAGATGACTAGCCACCTTTTCATGGAACCTCA  
AATTTTAAATAGACCAGTAACCCTGTGAGCTTTAGGTTTTGTATTTTTATTTACAG  
TAGGAGGATTAACAGGGGTAAATTTAGCTAATTCTTCAATTGATATTATTCTCCAC  
GATACTTACTATGTAGTAGCTCATTTTCACTATGTTCTTTCTATAGGAGCTGTATT  
TGCAATTATAGCCGGAATTGTCCAATGATTCCCATTATTTACCGGACTAACCTTA  
AATAATTTTTTTTTTAAAAACCCAATTTATTACTATATTTTTAGGTGTAAATTTAACAT  
TTTTTCCTCAACACTTTTTAGGGCTAAGAGGAATGCCTCGGCGATATTCGGATTA  
TCCAGATGCTTTCACTATCTGAAATGCCATTTTCATCTATTGGTTCCATTATTTCTC  
TCACAAGAATTATCTTTTTTTTTATTTATCTTATGAGAAAGGCTTTCTTCCCAACGT  
AAATCTTTGAGAACCTTTAAATGTAACAACCTTCAATTGAATGGTTCAAGCCCTACC  
CCCTAGTG

PE\_15

ATTATTAGACAAGAAAGGGGGGAAAAAAGAACCTTTTGGACCTTAGGAATAATTTA  
TGCTATAATACCTATCGGATTATTAGGATTCGTAGTTTGAGCTCACCATATATTTA  
CAGTAGATAGATGTAGATACCCGAGCTTACTTCACTTCAGCAACTATAATTATTG  
CGGTTCCAACCTGGGATTAAGTCTTTAGATGACTAGCCACCTTTTCATGGAACCTCA  
AATTTTAAATAGACCAGTAACCCTGTGAGCTTTAGGTTTTGTATTTTTATTTACAG  
TAGGAGGATTAACAGGGGTAAATTTAGCTAATTCTTCAATTGATATTATTCTCCAC  
GATACTTACTATGTAGTAGCTCATTTTCACTATGTTCTTTCTATAGGAGCTGTATT  
TGCAATTATAGCCGGAATTGTCCAATGATTCCCATTATTTACCGGACTAACCTTA  
AATAATTTTTTTTTTAAAAACCCAATTTATTACTATATTTTTAGGTGTAAATTTAACAT  
TTTTTCCTCAACACTTTTTAGGGCTAAGAGGAATGCCTCGGCGATATTCGGATTA  
TCCAGATGCTTTCACTATCTGAAATGCCATTTTCATCCATTGGTTCCATTATTTCTC  
TCACAAGAATTATCTTTTTTTTTATTTATCTTATGAGAAAGGCTTTCTTCCCAACGT  
AAATCTGTGAGAACCTTTAAATGTAACAACCTTCAATTGAATGGTTCAAGCCCTACC  
CCCTAGTG

PE\_16

ATTATTAGACAAGAAAGGGGGGAAAAAAGAAGCTTTTGGACCTTAGGAATAATTTA  
TGCTATAATAGCTATCGGATTATTAGGATTCGTAGTTTGAGCTCACCATATATTTA  
CAGTAGATAGATGTAGATACCCGAGCTTACTTCACTTCAGCAACTATAATTATTG  
CGGTTCCAACCTGGGATTAAGTCTTTAGATGACTAGCCACCTTTTCATGGAACCTCA  
AATTTTAAATAGACCAGTCACCCTGTGAGCTTTAGGTTTTGTATTTTTATTTACAG  
TAGGAGGATTAACAGGGGTAAATTTAGCTAATTCTTCAATTGATATTATTCTCCAC  
GATACTTACTATGTAGTAGCTCATTTTCACTATGTTCTTTCTATAGGAGCTGTATT  
TGCAATTATAGCCGGAATTGTCCAATGATTCCCATTATTTACCGGACTAACCTTA  
AATAATTTTTTTTTTAAAAACCCAATTTATTACTATATTTTTAGGTGTAAATTTAACAT  
TTTTTCCTCAACACTTTTTAGGGCTAAGAGGAATGCCTCGGCGATATTCGGATTA  
TCCAGATGCTTTCACTATCTGAAATGCCATTTTCATCTATTGGTTCCATTATTTCTC  
TCACAAGAATTATCTTTTTTTTTATTTATCTTATGAGAAAGGCTTTCTTCCCAACGT  
AAATCTTTGAGAACCTTTAAATGTAACAACCTTCAATTGAATGGTTCAAGCCCTACC  
CCCTAGTG

PE\_19

ATTATTAGACAAGAAAGGGGGGAAAAAAGAAGCTTTTGGACCTTAGGAATAATTTA  
TGCTATAATAGCTATCGGATTATTAGGATTCGTAGTTTGAGCTCACCATATATTTA  
CAGTAGATAGATGTAGATACCCGAGCTTACTTCACTTCAGCAACTATAATTATTG  
CGGTTCCAACCTGGGATTAAGTCTTTAGATGACTAGCCACCTTTTCATGGAACCTCA  
AATTTTAAATAGACCAGTCACCCTGTGAGCTTTAGGTTTTGTATTTTTATTTACAG  
TAGGAGGATTAACAGGGGTAAATTTAGCTAATTCTTCAATTGATATTATTCTCCAC

GATACTTACTATGTAGTAGCTCATTTTTCACTATGTTCTTTCTATAGGAGCTGTATT  
TGCAATTATAGCCGGAATTGTCCAATGATTCCCATTATTTACCGGACTAACCTTA  
ATAAATTTTTTTTTAAAAACCCAATTTATTACTATATTTTTAGGTGTAAATTTAACAT  
TTTTTCCTCAACACTTTTTAGGGCTAAGAGGAATGCCTCGGCGATATTCGGATTA  
TCCAGATGCTTTCACTATCTGAAATGCCATTTTCATCCATTGGTTCCATTATTTCTC  
TCACAAGAATTATCTTTTTTTTTATTTATCTTATGAGAAAGGCTTTCTTCCCAACGT  
AAATCTTTGAGAACTTTAAATGTAACAACCTTCAATTGAATGGTTCAAGCCCTACC  
CCCTAGTG

PE\_2

ATTATTAGACAAGAAAGGGGGAAAAAAGAAGCTTTTGGACCTTAGGAATAATTTA  
TGCTATAATAGCTATCGGATTATTAGGATTCGTAGTTTGAGCTCACCATATATTTA  
CAGTAGATAGATGTAGATACCCGAGCTTACTTCACTTCAGCAACTATAATTATTG  
CGGTTCCAACCTGGGATTAAGTCTTTAGATGACTAGCCACCTTTTCATGGAACTCA  
AATTTTAAATAGACCAGTCACCCTGTGAGCTTTAGGTTTTGTATTTTTATTTACAG  
TAGGAGGATTAACAGGGGTAATTTTAGCTAATTCTTCAATTGATATTATTCTCCAC  
GATACTTACTATGTAGTAGCTCATTTTTCACTATGTTCTTTCTATAGGAGCTGTATT  
TGCAATTATAGCCGGAATTGTCCAATGATTCCCATTATTTACCGGACTAACCTTA  
ATAAATTTTTTTTTAAAAACCCAATTTATTACTATATTTTTAGGTGTAAATTTAACAT  
TTTTTCCTCAACACTTTTTAGGGCTAAGAGGAATGCCTCGGCGATATTCGGATTA  
TCCAGATGCTTTCACTATCTGAAATGCCATTTTCATCTATTGGTTCCATTATTTCTC  
TCACAAGAATTATCTTTTTTTTTATTTATCTTATGAGAAAGGCTTTCTTCCCAACGT  
AAATCTTTGAGAACTTTAAATGTAACAACCTTCAATTGAATGGTTCAAGCCCTACC  
CCCTAGTG

PE\_23

ATTATTAGACAAGAAAGGGGGAAAAAAGAAGCTTTTGGACCTTAGGAATAATTTA  
TGCTATAATAGCTATCGGATTATTAGGATTCGTAGTTTGAGCTCACCATATATTTA  
CAGTAGATAGATGTAGATACCCGAGCTTACTTCACTTCAGCAACTATAATTATTG  
CGGTTCCAACCTGGGATTAAGTCTTTAGATGACTAGCCACCTTTTCATGGAACTCA  
AATTTTAAATAGACCAGTAACCCTGTGAGCTTTAGGTTTTGTATTTTTATTTACAG  
TAGGAGGATTAACAGGGGTAATTTTAGCTAATTCTTCAATTGATATTATTCTCCAC  
GATACTTACTATGTAGTAGCTCATTTTTCACTATGTTCTTTCTATAGGAGCTGTATT  
TGCAATTATAGCCGGAATTGTCCAATGATTCCCATTATTTACCGGACTAACCTTA  
ATAAATTTTTTTTTAAAAACCCAATTTATTACTATATTTTTAGGTGTAAATTTAACAT  
TTTTTCCTCAACACTTTTTAGGGCTAAGAGGAATGCCTCGGCGATATTCGGATTA  
TCCAGATGCTTTCACTATCTGAAATGCCATTTTCATCTATTGGTTCCATTATTTCTC  
TCACAAGAATTATCTTTTTTTTTATTTATCTTATGAGAAAGGCTTTCTTCCCAACGT  
AAATCTTTGAGAACTTTAAATGTAACAACCTTCAATTGAATGGTTCAAGCCCTACC  
CCCTAGTG

PE\_29

ATTATTAGACAAGAAAGGGGGAAAAAAGAAGCTTTTGGACCTTAGGAATAATTTA  
TGCTATAATAGCTATCGGATTATTAGGATTCGTAGTTTGAGCTCACCATATATTTA  
CAGTAGATAGATGTAGATACCCGAGCTTACTTCACTTCAGCAACTATAATTATTG  
CGGTTCCAACCTGGGATTAAGTCTTTAGATGACTAGCCACCTTTTCATGGAACTCA  
AATTTTAAATAGACCAGTCACCCTGTGAGCTTTAGGTTTTGTATTTTTATTTACAG  
TAGGAGGATTAACAGGGGTAATTTTAGCTAATTCTTCAATTGATATTATTCTCCAC  
GATACTTACTATGTAGTAGCTCATTTTTCACTATGTTCTTTCTATAGGAGCTGTATT  
TGCAATTATAGCCGGAATTGTCCAATGATTCCCATTATTTACCGGACTAACCTTA  
ATAAATTTTTTTTTAAAAACCCAATTTATTACTATATTTTTAGGTGTAAATTTAACAT  
TTTTTCCTCAACACTTTTTAGGGCTAAGAGGAATGCCTCGGCGATATTCGGATTA  
TCCAGATGCTTTCACTATCTGAAATGCCATTTTCATCTATTGGTTCCATTATTTCTC

TCACAAGAATTATCTTTTTTTTTATTTATCTTATGAGAAAGGCTTTCTTCCCAACGT  
AAATCTTTGAGAACTTTAAATGTAACAACCTTCAATTGAATGGTTCAAGCCCTACC  
CCCTAGTG

PE\_6

ATTATTAGACAAGAAAGGGGGGAAAAAAGAAGCTTTTGGACCTTAGGAATAATTTA  
TGCTATAATAGCTATCGGATTATTAGGATTCGTAGTTTGAGCTCACCATATATTTA  
CAGTAGATAGATGTAGATACCCGAGCTTACTTCACTTCAGCAACTATAATTATTG  
CGGTTCCAACCTGGGATTAAGTCTTTAGATGACTAGCCACCTTTTCATGGAACCTCA  
AATTTTAAATAGACCAGTAACCCTGTGAGCTTTAGGTTTTGTATTTTTATTTACAG  
TAGGAGGATTAACAGGGGTAAATTTAGCTAATTCTTCAATTGATATTATTCTCCAC  
GATACTTACTATGTAGTAGCTCATTTTCACTATGTTCTTTCTATAGGAGCTGTATT  
TGCAATTATAGCCGGAATTGTCCAATGATTCCCATTATTTACCGGACTAACCTTA  
ATAAATTTTTTTTTAAAAACCCAATTTATTACTATATTTTTAGGTGTAATTTAACAT  
TTTTTCCTCAACACTTTTTAGGGCTAAGAGGAATGCCTCGGCGATATTCGGATTA  
TCCAGATGCTTTCACTATCTGAAATGCCATTTTCATCTATTGGTTCCATTATTTCTC  
TCACAAGAATTATCTTTTTTTTTATTTATCTTATGAGAAAGGCTTTCTTCCCAACGT  
AAATCTTTGAGAACTTTAAATGTAACAACCTTCAATTGAATGGTTCAAGCCCTACC  
CCCTAGTG

PE\_8

ATTATTAGACAAGAAAGGGGGGAAAAAAGAAGCTTTTGGACCTTAGGAATAATTTA  
TGCTATAATAGCTATCGGATTATTAGGATTCGTAGTTTGAGCTCACCATATATTTA  
CAGTAGATAGATGTAGATACCCGAGCTTACTTCACTTCAGCAACTATAATTATTG  
CGGTTCCAACCTGGGATTAAGTCTTTAGATGACTAGCCACCTTTTCATGGAACCTCA  
AATTTTAAATAGACCAGTAACCCTGTGAGCTTTAGGTTTTGTATTTTTATTTACAG  
TAGGAGGATTAACAGGGGTAAATTTAGCTAATTCTTCAATTGATATTATTCTCCAC  
GATACTTACTATGTAGTAGCTCATTTTCACTATGTTCTTTCTATAGGAGCTGTATT  
TGCAATTATAGCCGGAATTGTCCAATGATTCCCATTATTTACCGGACTAACCTTA  
ATAAATTTTTTTTTAAAAACCCAATTTATTACTATATTTTTAGGTGTAATTTAACAT  
TTTTTCCTCAACACTTTTTAGGGCTAAGAGGAATGCCTCGGCGATATTCGGATTA  
TCCAGATGCTTTCACTATCTGAAATGCCATTTTCATCTATTGGTTCCATTATTTCTC  
TCACAAGAATTATCTTTTTTTTTATTTATCTTATGAGAAAGGCTTTCTTCCCAACGT  
AAATCTTTGAGAACTTTAAATGTAACAACCTTCAATTGAATGGTTCAAGCCCTACC  
CCCTAGTG

CL1\_1

ATTATTAGACAAGAAAGGGGGGAAAAAAGAAGCTTTTGGACCTTAGGAATAATTTA  
TGCTATAATAGCTATCGGATTATTAGGATTCGTAGTTTGAGCTCACCATATATTTA  
CAGTAGATAGATGTAGATACCCGAGCTTACTTCACTTCAGCAACTATAATTATTG  
CGGTTCCAACCTGGGATTAAGTCTTTAGATGACTAGCCACCTTTTCATGGAACCTCA  
AATTTTAAATAGACCAGTAACCCTGTGAGCTTTAGGTTTTGTATTTTTATTTACAG  
TAGGAGGATTAACAGGGGTAAATTTAGCTAATTCTTCAATTGATATTATTCTCCAC  
GATACTTACTATGTAGTAGCTCATTTTCACTATGTTCTTTCTATAGGAGCTGTATT  
TGCAATTATAGCCGGAATTGTCCAATGATTCCCATTATTTACCGGACTAACCTTA  
ATAAATTTTTTTTTAAAAACCCAATTTATTACTATATTTTTAGGTGTAATTTAACAT  
TTTTTCCTCAACACTTTTTAGGGCTAAGAGGAATGCCTCGGCGATATTCGGATTA  
TCCAGATGCTTTCACTATCTGAAATGCCATTTTCATCTATTGGTTCCATTATTTCTC  
TCACAAGAATTATCTTTTTTTTTATTTATCTTATGAGAAAGGCTTTCTTCCCAACGT  
AAATCTTTGAGAACTTTAAATGTAACAACCTTCAATTGAATGGTTCAAGCCCTACC  
CCCTAGTG

CL1\_2

ATTATTAGACAAGAAAGGGGGGAAAAAAGAAGCTTTTGGACCTTAGGAATAATTTA



TGCTATAATAGCTATCGGATTATTAGGATTCGTAGTTTGAGCTCACCATATATTTA  
CAGTAGATAGATGTAGATACCCGAGCTTACTTCACTTCAGCAACTATAATTATTG  
CGGTTCCAACCTGGGATTAAGTCTTTAGATGACTAGCCACCTTTTCATGGAACTCA  
AATTTTAAATAGACCAGTAACCCTGTGAGCTTTAGGTTTTGTATTTTTATTTACAG  
TAGGAGGATTAACAGGGGTAATTTTAGCTAATTCTTCAATTGATATTATTCTCCAC  
GATACTTACTATGTAGTAGCTCATTTTCACTATGTTCTTTCTATAGGAGCTGTATT  
TGCAATTATAGCCGGAATTGTCCAATGATTCCCATTATTTACCGGACTAACCTTA  
AATAATTTTTTTTTTAAAAACCCAATTTATTACCATATTTTTAGGTGTAAATTTAACA  
TTTTTTCCTCAACACTTTTTAGGGCTAAGAGGAATGCCTCGGCGATATTCGGATT  
ATCCAGATGCTTTCACTATCTGAAATGCCATTTTCATCTATTGGTTCCATTATTTCT  
CTCACAAGAATTATCTTTTTTTTTATTTATCTTATGAGAAAGGCTTTCTTCCCAACG  
TAAATCTTTGAGAACTTTAAATGTAACAACCTTCAATTGAATGGTTCAAGCCCTACC  
CCCTAGTG

CL1\_3

ATTATTAGACAAGAAAGGGGGGAAAAAAGAAGCTTTTGGACCTTAGGAATAATTTA  
TGCTATAATAGCTATCGGATTATTAGGATTCGTAGTTTGAGCTCACCATATATTTA  
CAGTAGATAGATGTAGATACCCGAGCTTACTTCACTTCAGCAACTATAATTATTG  
CGGTTCCAACCTGGGATTAAGTCTTTAGATGACTAGCCACCTTTTCATGGAACTCA  
AATTTTAAATAGACCAGTAACCCTGTGAGCTTTAGGTTTTGTATTTTTATTTACAG  
TAGGAGGATTAACAGGGGTAATTTTAGCTAATTCTTCAATTGATATTATTCTCCAC  
GATACTTACTATGTAGTAGCTCATTTTCACTATGTTCTTTCTATAGGAGCTGTATT  
TGCAATTATAGCCGGAATTGTCCAATGATTCCCATTATTTACCGGACTAACCTTA  
AATAATTTTTTTTTTAAAAACCCAATTTATTACTATATTTTTAGGTGTAAATTTAACA  
TTTTTTCCTCAACACTTTTTAGGGCTAAGAGGAATGCCTCGGCGATATTCGGATTA  
TCCAGATGCTTTCACTATCTGAAATGCCATTTTCATCTATTGGTTCCATTATTTCTC  
TCACAAGAATTATCTTTTTTTTTATTTATCTTATGAGAAAGGCTTTCTTCCCAACG  
AAATCTTTGAGAACTTTAAATGTAACAACCTTCAATTGAATGGTTCAAGCCCTACC  
CCCTAGTG

CL1\_4

ATTATTAGACAAGAAAGGGGGGAAAAAAGAAGCTTTTGGACCTTAGGAATAATTTA  
TGCTATAATAGCTATCGGATTATTAGGATTCGTAGTTTGAGCTCACCATATATTTA  
CAGTAGATAGATGTAGATACCCGAGCTTACTTCACTTCAGCAACTATAATTATTG  
CGGTTCCAACCTGGGATTAAGTCTTTAGATGACTAGCCACCTTTTCATGGAACTCA  
AATTTTAAATAGACCAGTAACCCTGTGAGCTTTAGGTTTTGTATTTTTATTTACAG  
TAGGAGGATTAACAGGGGTAATTTTAGCTAATTCTTCAATTGATATTATTCTCCAC  
GATACTTACTATGTAGTAGCTCATTTTCACTATGTTCTTTCTATAGGAGCTGTATT  
TGCAATTATAGCCGGAATTGTCCAATGATTCCCATTATTTACCGGACTAACCTTA  
AATAATTTTTTTTTTAAAAACCCAATTTATTACTATATTTTTAGGTGTAAATTTAACA  
TTTTTTCCTCAACACTTTTTAGGGCTAAGAGGAATGCCTCGGCGATATTCGGATTA  
TCCAGATGCTTTCACTATCTGAAATGCCATTTTCATCTATTGGTTCCATTATTTCTC  
TCACAAGAATTATCTTTTTTTTTATTTATCTTATGAGAAAGGCTTTCTTCCCAACG  
AAATCTTTGAGAACTTTAAATGTAACAACCTTCAATTGAATGGTTCAAGCCCTACC  
CCCTAGTG

CL1\_5

ATTATTAGACAAGAAAGGGGGGAAAAAAGAAGCTTTTGGACCTTAGGAATAATTTA  
TGCTATAATAGCTATCGGATTATTAGGATTCGTAGTTTGAGCTCACCATATATTTA  
CAGTAGATAGATGTAGATACCCGAGCTTACTTCACTTCAGCAACTATAATTATTG  
CGGTTCCAACCTGGGATTAAGTCTTTAGATGACTAGCCACCTTTTCATGGAACTCA  
AATTTTAAATAGACCAGTAACCCTGTGAGCTTTAGGTTTTGTATTTTTATTTACAG  
TAGGAGGATTAACAGGGGTAATTTTAGCTAATTCTTCAATTGATATTATTCTCCAC

GATACTTACTATGTAGTAGCTCATTTTTCACTATGTTCTTTCTATAGGAGCTGTATT  
TGCAATTATAGCCGGAATTGTCCAATGATTCCCATTATTTACCGGACTAACCTTA  
AATAATTTTTTTTTAAAAACCCAATTTATTACCATATTTTTAGGTGTAAATTTAACA  
TTTTTTCCTCAACACTTTTTAGGGCTAAGAGGAATGCCTCGGCGATATTCGGATT  
ATCCAGATGCTTTCCTACTATCTGAAATGCCATTTTCATCTATTGGTTCCATTATTTCT  
CTCACAAGAATTATCTTTTTTTTTATTTATCTTATGAGAAAGGCTTTCTTCCCAACG  
TAAATCTTTGAGAACTTTAAATGTAACAACCTTCAATTGAATGGTTCAAGCCCTACC  
CCCTAGTG

CL1\_6

ATTATTAGACAAGAAAGGGGGGAAAAAAGAAGCTTTTGGACCTTAGGAATAATTTA  
TGCTATAATAGCTATCGGATTATTAGGATTCGTAGTTTGAGCTCACCATATATTTA  
CAGTAGATAGATGTAGATACCCGAGCTTACTTCACTTCAGCAACTATAATTATTG  
CGGTTCCAACCTGGGATTAAGTCTTTAGATGACTAGCCACCTTTCATGGAACTCA  
AATTTTAAATAGACCAGTAACCCTGTGAGCTTTAGGTTTTGTATTTTTATTTACAG  
TAGGAGGATTAACAGGGGGTAATTTTAGCTAATTCTTCAATTGATATTATTCTCCAC  
GATACTTACTATGTAGTAGCTCATTTTTCACTATGTTCTTTCTATAGGAGCTGTATT  
TGCAATTATAGCCGGAATTGTCCAATGATTCCCATTATTTACCGGACTAACCTTA  
AATAATTTTTTTTTAAAAACCCAATTTATTACCATATTTTTAGGTGTAAATTTAACA  
TTTTTTCCTCAACACTTTTTAGGGCTAAGAGGAATGCCTCGGCGATATTCGGATT  
ATCCAGATGCTTTCCTACTATCTGAAATGCCATTTTCATCTATTGGTTCCATTATTTCT  
CTCACAAGAATTATCTTTTTTTTTATTTATCTTATGAGAAAGGCTTTCTTCCCAACG  
TAAATCTTTGAGAACTTTAAATGTAACAACCTTCAATTGAATGGTTCAAGCCCTACC  
CCCTAGTG

CL1\_7

ATTATTAGACAAGAAAGGGGGGAAAAAAGAAGCTTTTGGACCTTAGGAATAATTTA  
TGCTATAATAGCTATCGGATTATTAGGATTCGTAGTTTGAGCTCACCATATATTTA  
CAGTAGATAGATGTAGATACCCGAGCTTACTTCACTTCAGCAACTATAATTATTG  
CGGTTCCAACCTGGGATTAAGTCTTTAGATGACTAGCCACCTTTCATGGAACTCA  
AATTTTAAATAGACCAGTAACCCTGTGAGCTTTAGGTTTTGTATTTTTATTTACAG  
TAGGAGGATTAACAGGGGGTAATTTTAGCTAATTCTTCAATTGATATTATTCTCCAC  
GATACTTACTATGTAGTAGCTCATTTTTCACTATGTTCTTTCTATAGGAGCTGTATT  
TGCAATTATAGCCGGAATTGTCCAATGATTCCCATTATTTACCGGACTAACCTTA  
AATAATTTTTTTTTAAAAACCCAATTTATTACTATATTTTTAGGTGTAAATTTAACA  
TTTTTTCCTCAACACTTTTTAGGGCTAAGAGGAATGCCTCGGCGATATTCGGATTA  
TCCAGATGCTTTCCTACTATCTGAAATGCCATTTTCATCTATTGGTTCCATTATTTCTC  
TCACAAGAATTATCTTTTTTTTTATTTATCTTATGAGAAAGGCTTTCTTCCCAACGT  
AAATCTTTGAGAACTTTAAATGTAACAACCTTCAATTGAATGGTTCAAGCCCTACC  
CCCTAGTG

CL1\_8

ATTATTAGACAAGAAAGGGGGGAAAAAAGAAGCTTTTGGACCTTAGGAATAATTTA  
TGCTATAATAGCTATCGGATTATTAGGATTCGTAGTTTGAGCTCACCATATATTTA  
CAGTAGATAGATGTAGATACCCGAGCTTACTTCACTTCAGCAACTATAATTATTG  
CGGTTCCAACCTGGGATTAAGTCTTTAGATGACTAGCCACCTTTCATGGAACTCA  
AATTTTAAATAGACCAGTAACCCTGTGAGCTTTAGGTTTTGTATTTTTATTTACAG  
TAGGAGGATTAACAGGGGGTAATTTTAGCTAATTCTTCAATTGATATTATTCTCCAC  
GATACTTACTATGTAGTAGCTCATTTTTCACTATGTTCTTTCTATAGGAGCTGTATT  
TGCAATTATAGCCGGAATTGTCCAATGATTCCCATTATTTACCGGACTAACCTTA  
AATAATTTTTTTTTAAAAACCCAATTTATTACCATATTTTTAGGTGTAAATTTAACA  
TTTTTTCCTCAACACTTTTTAGGGCTAAGAGGAATGCCTCGGCGATATTCGGATT  
ATCCAGATGCTTTCCTACTATCTGAAATGCCATTTTCATCTATTGGTTCCATTATTTCT

CTCACAAGAATTATCTTTTTTTTTATTTATCTTATGAGAAAGGCTTTCTTCCCAACG  
TAAATCTTTGAGAACTTTAAATGTAACAACCTTCAATTGAATGGTTCAAGCCCTACC  
CCCTAGTG

CL1\_9

ATTATTAGACAAGAAAGGGGGGAAAAAAGAAGCTTTTGGACCTTAGGAATAATTTA  
TGCTATAATAGCTATCGGATTATTAGGATTCGTAGTTTGAGCTCACCATATATTTA  
CAGTAGATAGATGTAGATACCCGAGCTTACTTCACTTCAGCAACTATAATTATTG  
CGGTTCCAACCTGGGATTAAGTCTTTAGATGACTAGCCACCTTTTCATGGAACTCA  
AATTTTAAATAGACCAGTAACCCTGTGAGCTTTAGGTTTTGTATTTTTATTTACAG  
TAGGAGGATTAACAGGGGTAAATTTAGCTAATTCTTCAATTGATATTATTCTCCAC  
GATACTTACTATGTAGTAGCTCATTTTCACTATGTTCTTTCTATAGGAGCTGTATT  
TGCAATTATAGCCGGAATTGTCCAATGATTCCCATTATTTACCGGACTAACCTTA  
ATAAATTTTTTTTTAAAAACCCAATTTATTACTATATTTTTAGGTGTAATTTAACAT  
TTTTTCCTCAACACTTTTTAGGGCTAAGAGGAATGCCTCGGCGATATTCGGATTA  
TCCAGATGCTTTCACTATCTGAAATGCCATTTTCATCTATTGGTTCCATTATTTCTC  
TCACAAGAATTATCTTTTTTTTTATTTATCTTATGAGAAAGGCTTTCTTCCCAACG  
AAATCTTTGAGAACTTTAAATGTAACAACCTTCAATTGAATGGTTCAAGCCCTACC  
CCCTAGTG

CL2\_3

ATTATTAGACAAGAAAGGGGGGAAAAAAGAAGCTTTTGGACCTTAGGAATAATTTA  
TGCTATAATAGCTATCGGATTATTAGGATTCGTAGTTTGAGCTCACCATATATTTA  
CAGTAGATAGATGTAGATACCCGAGCTTACTTCACTTCAGCAACTATAATTATTG  
CGGTTCCAACCTGGGATTAAGTCTTTAGATGACTAGCCACCTTTTCATGGAACTCA  
AATTTTAAATAGACCAGTAACCCTGTGAGCTTTAGGTTTTGTATTTTTATTTACAG  
TAGGAGGATTAACAGGGGTAAATTTAGCTAATTCTTCAATTGATATTATTCTCCAC  
GATACTTACTATGTAGTAGCTCATTTTCACTATGTTCTTTCTATAGGAGCTGTATT  
TGCAATTATAGCCGGAATTGTCCAATGATTCCCATTATTTACCGGACTAACCTTA  
ATAAATTTTTTTTTAAAAACCCAATTTATTACTATATTTTTAGGTGTAATTTAACAT  
TTTTTCCTCAACACTTTTTAGGGCTAAGAGGAATGCCTCGGCGATATTCGGATTA  
TCCAGATGCTTTCACTATCTGAAATGCCATTTTCATCTATTGGTTCCATTATTTCTC  
TCACAAGAATTATCTTTTTTTTTATTTATCTTATGAGAAAGGCTTTCTTCCCAACG  
AAATCTTTGAGAACTTTAAATGTAACAACCTTCAATTGAATGGTTCAAGCCCTACC  
CCCTAGTG

CL2\_4

ATTATTAGACAAGAAAGGGGGGAAAAAAGAAGCTTTTGGACCTTAGGAATAATTTA  
TGCTATAATAGCTATCGGATTATTAGGATTCGTAGTTTGAGCTCACCATATATTTA  
CAGTAGATAGATGTAGATACCCGAGCTTACTTCACTTCAGCAACTATAATTATTG  
CGGTTCCAACCTGGGATTAAGTCTTTAGATGACTAGCCACCTTTTCATGGAACTCA  
AATTTTAAATAGACCAGTAACCCTGTGAGCTTTAGGTTTTGTATTTTTATTTACAG  
TAGGAGGATTAACAGGGGTAAATTTAGCTAATTCTTCAATTGATATTATTCTCCAC  
GATACTTACTATGTAGTAGCTCATTTTCACTATGTTCTTTCTATAGGAGCTGTATT  
TGCAATTATAGCCGGAATTGTCCAATGATTCCCATTATTTACCGGACTAACCTTA  
ATAAATTTTTTTTTAAAAACCCAATTTATTACTATATTTTTAGGTGTAATTTAACAT  
TTTTTCCTCAACACTTTTTAGGGCTAAGAGGAATGCCTCGGCGATATTCGGATTA  
TCCAGATGCTTTCACTATCTGAAATGCCATTTTCATCTATTGGTTCCATTATTTCTC  
TCACAAGAATTATCTTTTTTTTTATTTATCTTATGAGAAAGGCTTTCTTCCCAACG  
AAATCTTTGAGAACTTTAAATGTAACAACCTTCAATTGAATGGTTCAAGCCCTACC  
CCCTAGTG

CL2\_5

ATTATTAGACAAGAAAGGGGGGAAAAAAGAAGCTTTTGGACCTTAGGAATAATTTA

TGCTATAATAGCTATCGGATTATTAGGATTCGTAGTTTGAGCTCACCATATATTTA  
CAGTAGATAGATGTAGATACCCGAGCTTACTTCACTTCAGCAACTATAATTATTG  
CGGTTCCAACCTGGGATTAAGTCTTTAGATGACTAGCCACCTTTCATGGAACTCA  
AATTTTAAATAGACCAGTAACCCTGTGAGCTTTAGGTTTTGTATTTTTATTTACAG  
TAGGAGGATTAACAGGGGTAATTTTAGCTAATTCTTCAATTGATATTATTCTCCAC  
GATACTTACTATGTAGTAGCTCATTTTCACTATGTTCTTTCTATAGGAGCTGTATT  
TGCAATTATAGCCGGAATTGTCCAATGATTCCCATTATTTACCGGACTAACCTTA  
AATAATTTTTTTTTTAAAAACCCAATTTATTACTATATTTTTAGGTGTAAATTTAACAT  
TTTTTCCTCAACACTTTTTAGGGCTAAGAGGAATGCCTCGGCGATATTCGGATTA  
TCCAGATGCTTTCACTATCTGAAATGCCATTTTCATCTATTGGTTCCATTATTTCTC  
TCACAAGAATTATCTTTTTTTTTATTTATCTTATGAGAAAGGCTTTCTTCCCAACGT  
AAATCTTTGAGAACCTTTAAATGTAACAACCTTCAATTGAATGGTTCAAGCCCTACC  
CCCTAGTG

CL2\_6

ATTATTAGACAAGAAAGGGGGGAAAAAAGAAGCTTTTGGACCTTAGGAATAATTTA  
TGCTATAATAGCTATCGGATTATTAGGATTCGTAGTTTGAGCTCACCATATATTTA  
CAGTAGATAGATGTAGATACCCGAGCTTACTTCACTTCAGCAACTATAATTATTG  
CGGTTCCAACCTGGGATTAAGTCTTTAGATGACTAGCCACCTTTCATGGAACTCA  
AATTTTAAATAGACCAGTAACCCTGTGAGCTTTAGGTTTTGTATTTTTATTTACAG  
TAGGAGGATTAACAGGGGTAATTTTAGCTAATTCTTCAATTGATATTATTCTCCAC  
GATACTTACTATGTAGTAGCTCATTTTCACTATGTTCTTTCTATAGGAGCTGTATT  
TGCAATTATAGCCGGAATTGTCCAATGATTCCCATTATTTACCGGACTAACCTTA  
AATAATTTTTTTTTTAAAAACCCAATTTATTACTATATTTTTAGGTGTAAATTTAACAT  
TTTTTCCTCAACACTTTTTAGGGCTAAGAGGAATGCCTCGGCGATATTCGGATTA  
TCCAGATGCTTTCACTATCTGAAATGCCATTTTCATCTATTGGTTCCATTATTTCTC  
TCACAAGAATTATCTTTTTTTTTATTTATCTTATGAGAAAGGCTTTCTTCCCAACGT  
AAATCTTTGAGAACCTTTAAATGTAACAACCTTCAATTGAATGGTTCAAGCCCTACC  
CCCTAGTG

CL2\_7

ATTATTAGACAAGAAAGGGGGGAAAAAAGAAGCTTTTGGACCTTAGGAATAATTTA  
TGCTATAATAGCTATCGGATTATTAGGATTCGTAGTTTGAGCTCACCATATATTTA  
CAGTAGATAGATGTAGATACCCGAGCTTACTTCACTTCAGCAACTATAATTATTG  
CGGTTCCAACCTGGGATTAAGTCTTTAGATGACTAGCCACCTTTCATGGAACTCA  
AATTTTAAATAGACCAGTAACCCTGTGAGCTTTAGGTTTTGTATTTTTATTTACAG  
TAGGAGGATTAACAGGGGTAATTTTAGCTAATTCTTCAATTGATATTATTCTCCAC  
GATACTTACTATGTAGTAGCTCATTTTCACTATGTTCTTTCTATAGGAGCTGTATT  
TGCAATTATAGCCGGAATTGTCCAATGATTCCCATTATTTACCGGACTAACCTTA  
AATAATTTTTTTTTTAAAAACCCAATTTATTACTATATTTTTAGGTGTAAATTTAACAT  
TTTTTCCTCAACACTTTTTAGGGCTAAGAGGAATGCCTCGGCGATATTCGGATTA  
TCCAGATGCTTTCACTATCTGAAATGCCATTTTCATCTATTGGTTCCATTATTTCTC  
TCACAAGAATTATCTTTTTTTTTATTTATCTTATGAGAAAGGCTTTCTTCCCAACGT  
AAATCTTTGAGAACCTTTAAATGTAACAACCTTCAATTGAATGGTTCAAGCCCTACC  
CCCTAGTG

CL2\_8

ATTATTAGACAAGAAAGGGGGGAAAAAAGAAGCTTTTGGACCTTAGGAATAATTTA  
TGCTATAATAGCTATCGGATTATTAGGATTCGTAGTTTGAGCTCACCATATATTTA  
CAGTAGATAGATGTAGATACCCGAGCTTACTTCACTTCAGCAACTATAATTATTG  
CGGTTCCAACCTGGGATTAAGTCTTTAGATGACTAGCCACCTTTCATGGAACTCA  
AATTTTAAATAGACCAGTAACCCTGTGAGCTTTAGGTTTTGTATTTTTATTTACAG  
TAGGAGGATTAACAGGGGTAATTTTAGCTAATTCTTCAATTGATATTATTCTCCAC

GATACTTACTATGTAGTAGCTCATTTTTCACTATGTTCTTTCTATAGGAGCTGTATT  
TGCAATTATAGCCGGAATTGTCCAATGATTCCCATTATTTACCGGACTAACCTTA  
ATAAATTTTTTTTTAAAAACCCAATTTATTACTATATTTTTAGGTGTAATTTAACAT  
TTTTTCCTCAACACTTTTTAGGGCTAAGAGGAATGCCTCGGCGATATTCGGATTA  
TCCAGATGCTTTCACTATCTGAAATGCCATTTTCATCTATTGGTTCCATTATTTCTC  
TCACAAGAATTATCTTTTTTTTTATTTATCTTATGAGAAAGGCTTTCTTCCCAACGT  
AAATCTTTGAGAACTTTAAATGTAACAACCTTCAATTGAATGGTTCAAGCCCTACC  
CCCTAGTG

CL2\_1

ATTATTAGACAAGAAAGGGGGAAAAAAGAAGCTTTTGGACCTTAGGAATAATTTA  
TGCTATAATAGCTATCGGATTATTAGGATTCGTAGTTTGAGCTCACCATATATTTA  
CAGTAGATAGATGTAGATACCCGAGCTTACTTCACTTCAGCAACTATAATTATTG  
CGGTTCCAACCTGGGATTAAGTCTTTAGATGACTAGCCACCTTTTCATGGAACCTCA  
AATTTTAAATAGACCAGTAACCCTGTGAGCTTTAGGTTTTGTATTTTTATTTACAG  
TAGGAGGATTAACAGGGGTAATTTTAGCTAATTCTTCAATTGATATTATTCTCCAC  
GATACTTACTATGTAGTAGCTCATTTTTCACTATGTTCTTTCTATAGGAGCTGTATT  
TGCAATTATAGCCGGAATTGTCCAATGATTCCCATTATTTACCGGACTAACCTTA  
ATAAATTTTTTTTTAAAAACCCAATTTATTACTATATTTTTAGGTGTAATTTAACAT  
TTTTTCCTCAACACTTTTTAGGGCTAAGAGGAATGCCTCGGCGATATTCGGATTA  
TCCAGATGCTTTCACTATCTGAAATGCCATTTTCATCTATTGGTTCCATTATTTCTC  
TCACAAGAATTATCTTTTTTTTTATTTATCTTATGAGAAAGGCTTTCTTCCCAACGT  
AAATCTTTGAGAACTTTAAATGTAACAACCTTCAATTGAATGGTTCAAGCCCTACC  
CCCTAGTG

CL2\_2

ATTATTAGACAAGAAAGGGGGAAAAAAGAAGCTTTTGGACCTTAGGAATAATTTA  
TGCTATAATAGCTATCGGATTATTAGGATTCGTAGTTTGAGCTCACCATATATTTA  
CAGTAGATAGATGTAGATACCCGAGCTTACTTCACTTCAGCAACTATAATTATTG  
CGGTTCCAACCTGGGATTAAGTCTTTAGATGACTAGCCACCTTTTCATGGAACCTCA  
AATTTTAAATAGACCAGTAACCCTGTGAGCTTTAGGTTTTGTATTTTTATTTACAG  
TAGGAGGATTAACAGGGGTAATTTTAGCTAATTCTTCAATTGATATTATTCTCCAC  
GATACTTACTATGTAGTAGCTCATTTTTCACTATGTTCTTTCTATAGGAGCTGTATT  
TGCAATTATAGCCGGAATTGTCCAATGATTCCCATTATTTACCGGACTAACCTTA  
ATAAATTTTTTTTTAAAAACCCAATTTATTACTATATTTTTAGGTGTAATTTAACAT  
TTTTTCCTCAACACTTTTTAGGGCTAAGAGGAATGCCTCGGCGATATTCGGATTA  
TCCAGATGCTTTCACTATCTGAAATGCCATTTTCATCTATTGGTTCCATTATTTCTC  
TCACAAGAATTATCTTTTTTTTTATTTATCTTATGAGAAAGGCTTTCTTCCCAACGT  
AAATCTTTGAGAACTTTAAATGTAACAACCTTCAATTGAATGGTTCAAGCCCTACC  
CCCTAGTG

EQ1\_3

ATTATTAGACAAGAAAGGGGGAAAAAAGAAGCTTTTGGACCTTAGGAATAATTTA  
TGCTATAATAGCTATCGGATTATTAGGATTCGTAGTTTGAGCTCACCATATATTTA  
CAGTAGATAGATGTAGATACCCGAGCTTACTTCACTTCAGCAACTATAATTATTG  
CGGTTCCAACCTGGGATTAAGTCTTTAGATGACTAGCCACCTTTTCATGGAACCTCA  
AATTTTAAATAGACCAGTAACCCTGTGAGCTTTAGGTTTTGTATTTTTATTTACAG  
TAGGAGGATTAACAGGGGTAATTTTAGCTAATTCTTCAATTGATATTATTCTCCAC  
GATACTTACTATGTAGTAGCTCATTTTTCACTATGTTCTTTCTATAGGAGCTGTATT  
TGCAATTATAGCCGGAATTGTCCAATGATTCCCATTATTTACCGGACTAACCTTA  
ATAAATTTTTTTTTAAAAACCCAATTTATTACTATATTTTTAGGTGTAATTTAACAT  
TTTTTCCTCAACACTTTTTAGGGCTAAGAGGAATGCCTCGGCGATATTCGGATTA  
TCCAGATGCTTTCACTATCTGAAATGCCATTTTCATCTATTGGTTCCATTATTTCTC

TCACAAGAATTATCTTTTTTTTTATTTATCTTATGAGAAAGGCTTTCTTCCCAACGT  
AAATCTTTGAGAACTTTAAATGTAACAACCTTCAATTGAATGGTTCAAGCCCTACC  
CCCTAGTG

EQ1\_6

ATTATTAGACAAGAAAGGGGGGAAAAAAGAAGCTTTTGGACCTTAGGAATAATTTA  
TGCTATAATAGCTATCGGATTATTAGGATTCGTAGTTTGAGCTCACCATATATTTA  
CAGTAGATAGATGTAGATACCCGAGCTTACTTCACTTCAGCAACTATAATTATTG  
CGGTTCCAACCTGGGATTAAGTCTTTAGATGACTAGCCACCTTTTCATGGAACCTCA  
AATTTTAAATAGACCAGTAACCCTGTGAGCTTTAGGTTTTGTATTTTTATTTACAG  
TAGGAGGATTAACAGGGGTAAATTTAGCTAATTCTTCAATTGATATTATTCTCCAC  
GATACTTACTATGTAGTAGCTCATTTTCACTATGTTCTTTCTATAGGAGCTGTATT  
TGCAATTATAGCCGGAATTGTCCAATGATTCCCATTATTTACCGGACTAACCTTA  
ATAAATTTTTTTTTAAAAACCCAATTTATTACTATATTTTTAGGTGTAATTTAACAT  
TTTTTCCTCAACACTTTTTAGGGCTAAGAGGAATGCCTCGGCGATATTCGGATTA  
TCCAGATGCTTTCACTATCTGAAATGCCATTTTCATCTATTGGTTCCATTATTTCTC  
TCACAAGAATTATCTTTTTTTTTATTTATCTTATGAGAAAGGCTTTCTTCCCAACGT  
AAATCTTTGAGAACTTTAAATGTAACAACCTTCAATTGAATGGTTCAAGCCCTACC  
CCCTAGTG

EQ1\_7

ATTATTAGACAAGAAAGGGGGGAAAAAAGAAGCTTTTGGACCTTAGGAATAATTTA  
TGCTATAATAGCTATCGGATTATTAGGATTCGTAGTTTGAGCTCACCATATATTTA  
CAGTAGATAGATGTAGATACCCGAGCTTACTTCACTTCAGCAACTATAATTATTG  
CGGTTCCAACCTGGGATTAAGTCTTTAGATGACTAGCCACCTTTTCATGGAACCTCA  
AATTTTAAATAGACCAGTAACCCTGTGAGCTTTAGGTTTTGTATTTTTATTTACAG  
TAGGAGGATTAACAGGGGTAAATTTAGCTAATTCTTCAATTGATATTATTCTCCAC  
GATACTTACTATGTAGTAGCTCATTTTCACTATGTTCTTTCTATAGGAGCTGTATT  
TGCAATTATAGCCGGAATTGTCCAATGATTCCCATTATTTACCGGACTAACCTTA  
ATAAATTTTTTTTTAAAAACCCAATTTATTACTATATTTTTAGGTGTAATTTAACAT  
TTTTTCCTCAACACTTTTTAGGGCTAAGAGGAATGCCTCGGCGATATTCGGATTA  
TCCAGATGCTTTCACTATCTGAAATGCCATTTTCATCTATTGGTTCCATTATTTCTC  
TCACAAGAATTATCTTTTTTTTTATTTATCTTATGAGAAAGGCTTTCTTCCCAACGT  
AAATCTTTGAGAACTTTAAATGTAACAACCTTCAATTGAATGGTTCAAGCCCTACC  
CCCTAGTG

EQ1\_8

ATTATTAGACAAGAAAGGGGGGAAAAAAGAAGCTTTTGGACCTTAGGAATAATTTA  
TGCTATAATAGCTATCGGATTATTAGGATTCGTAGTTTGAGCTCACCATATATTTA  
CAGTAGATAGATGTAGATACCCGAGCTTACTTCACTTCAGCAACTATAATTATTG  
CGGTTCCAACCTGGGATTAAGTCTTTAGATGACTAGCCACCTTTTCATGGAACCTCA  
AATTTTAAATAGACCAGTAACCCTGTGAGCTTTAGGTTTTGTATTTTTATTTACAG  
TAGGAGGATTAACAGGGGTAAATTTAGCTAATTCTTCAATTGATATTATTCTCCAC  
GATACTTACTATGTAGTAGCTCATTTTCACTATGTTCTTTCTATAGGAGCTGTATT  
TGCAATTATAGCCGGAATTGTCCAATGATTCCCATTATTTACCGGACTAACCTTA  
ATAAATTTTTTTTTAAAAACCCAATTTATTACTATATTTTTAGGTGTAATTTAACAT  
TTTTTCCTCAACACTTTTTAGGGCTAAGAGGAATGCCTCGGCGATATTCGGATTA  
TCCAGATGCTTTCACTATCTGAAATGCCATTTTCATCTATTGGTTCCATTATTTCTC  
TCACAAGAATTATCTTTTTTTTTATTTATCTTATGAGAAAGGCTTTCTTCCCAACGT  
AAATCTTTGAGAACTTTAAATGTAACAACCTTCAATTGAATGGTTCAAGCCCTACC  
CCCTAGTG

EQU\_5

ATTATTAGACAAGAAAGGGGGGAAAAAAGAAGCTTTTGGACCTTAGGAATAATTTA

TGCTATAATAGCTATCGGATTATTAGGATTCGTAGTTTGAGCTCACCATATATTTA  
CAGTAGATAGATGTAGATACCCGAGCTTACTTCACTTCAGCAACTATAATTATTG  
CGGTTCCAAGTGGGATTAAGTCTTTAGATGACTAGCCACCTTTTCATGGAAGTCA  
AATTTTAAATAGACCAGTAACCCTGTGAGCTTTAGGTTTTGTATTTTTATTTACAG  
TAGGAGGATTAACAGGGGTAATTTTAGCTAATTCTTCAATTGATATTATTCTCCAC  
GATACTTACTATGTAGTAGCTCATTTTCACTATGTTCTTTCTATAGGAGCTGTATT  
TGCAATTATAGCCGGAATTGTCCAATGATTCCCATTATTTACCGGACTAACCTTA  
AATAATTTTTTTTTTAAAAACCCAATTTATTACTATATTTTTTAGGTGTAAATTTAACAT  
TTTTTCCTCAACACTTTTTAGGGCTAAGAGGAATGCCTCGGCGATATTCGGATTA  
TCCAGATGCTTTCACTATCTGAAATGCCATTTTCATCTATTGGTTCCATTATTTCTC  
TCACAAGAATTATCTTTTTTTTTATTTATCTTATGAGAAAGGCTTTCTTCCCAACGT  
AAATCTTTGAGAACTTTAAATGTAACAACCTTCAATTGAATGGTTCAAGCCCTACC  
CCCTAGTG

;

endblock;
